# Supplementary material for: Arsenite Exposure to Human RPCs (HRTPT) Produces a Reversible Epithelial Mesenchymal Transition (EMT): In-Vitro and In-Silico Study
Source: MDPI journal article supplement (doi:10.3390/ijms24065092), 2023-03-07
Supplement: s1 [file s1]

Supplementary Table S1: The list of most significant genes (p<0.05) using ANOVA across all possible conditions (i.e., Control, P3, P8, P10, p2, P11).

|                   | probe             | PublicGeneIDs | HUGO.gene.symbol | Entrez Gene.ID                 | f.v<br>alue     | p. value     | X.lo<br>g10. p. | FDR          | Fisher.s.LSD                                                                                                                                              |
|-------------------|-------------------|---------------|------------------|--------------------------------|-----------------|--------------|-----------------|--------------|-----------------------------------------------------------------------------------------------------------------------------------------------------------|
| TC0700006913.hg.1 | TC0700006913.hg.1 | NM_001005340  | GNPMB            | 10457                          | 27<br>34.<br>4  | 6.66<br>E-18 | 17.1<br>76      | 1.66<br>E-14 | ctrl - P10; P11 - ctrl; ctrl - P2; ctrl - P3; ctrl - P8; P11 - P10; P2 - P10; P3 - P10; P8 - P10; P11 - P2; P11 - P3; P11 - P8; P2 - P3; P2 - P8; P3 - P8 |
| TC1100006995.hg.1 | TC1100006995.hg.1 | NM_000331     | SAA1             | 6288                           | 10<br>95.<br>1  | 1.60<br>E-15 | 14.7<br>96      | 2.00<br>E-12 | P10 - ctrl; ctrl - P11; ctrl - P2; P3 - ctrl; P8 - ctrl; P10 - P11; P10 - P2; P10 - P3; P8 - P10; P11 - P2; P3 - P11; P8 - P11; P3 - P2; P8 - P2; P8 - P3 |
| TC1600007235.hg.1 | TC1600007235.hg.1 | NM_005030     | PLK1             | 5347                           | 99<br>2.6<br>8  | 2.88<br>E-15 | 14.5<br>41      | 2.09<br>E-12 | P10 - ctrl; ctrl - P11; ctrl - P2; P8 - ctrl; P10 - P11; P10 - P2; P10 - P3; P8 - P10; P11 - P2; P3 - P11; P8 - P11; P3 - P2; P8 - P2; P8 - P3            |
| TC1900009443.hg.1 | TC1900009443.hg.1 | NM_000064     | C3               | 718                            | 96<br>8.2<br>4  | 3.34<br>E-15 | 14.4<br>76      | 2.09<br>E-12 | P10 - ctrl; P3 - ctrl; P8 - ctrl; P10 - P11; P10 - P2; P10 - P3; P3 - P11; P8 - P11; P3 - P2; P8 - P2; P8 - P3                                            |
| TC1500010739.hg.1 | TC1500010739.hg.1 | NM_000338     | SLC12A1          | chloride transporter, member 1 | 87<br>7.5       | 6.02<br>E-15 | 14.2<br>21      | 3.01<br>E-12 | ctrl - P10; ctrl - P2; ctrl - P3; ctrl - P8; P11 - P10; P2 - P10; P3 - P10; P8 - P10; P11 - P2; P11 - P3; P11 - P8; P2 - P3; P2 - P8; P3 - P8             |
| TC1200009834.hg.1 | TC1200009834.hg.1 | NM_001297709  | MFAP5            | 8076                           | 71<br>0.8<br>6  | 2.12<br>E-14 | 13.6<br>74      | 7.72<br>E-12 | P10 - ctrl; P11 - ctrl; P2 - ctrl; P3 - ctrl; P8 - ctrl; P10 - P11; P10 - P2; P2 - P11; P3 - P11; P8 - P11; P3 - P2; P8 - P2; P8 - P3                     |
| TC0900008847.hg.1 | TC0900008847.hg.1 | NM_005564     | LCN2             | 3934                           | 68<br>8.8<br>5  | 2.56<br>E-14 | 13.5<br>92      | 7.72<br>E-12 | P10 - ctrl; P11 - ctrl; P3 - ctrl; P8 - ctrl; P10 - P11; P10 - P2; P10 - P3; P11 - P2; P3 - P11; P8 - P11; P3 - P2; P8 - P2; P8 - P3                      |
| TC0200007418.hg.1 | TC0200007418.hg.1 | NM_000341     | SLC3A1           | 6519                           | 68<br>6.8<br>7  | 2.60<br>E-14 | 13.5<br>85      | 7.72<br>E-12 | ctrl - P10; P11 - ctrl; ctrl - P2; ctrl - P3; ctrl - P8; P11 - P10; P2 - P10; P10 - P3; P10 - P8; P11 - P2; P11 - P3; P11 - P8; P2 - P3; P2 - P8; P8 - P3 |
| TC0300012768.hg.1 | TC0300012768.hg.1 | NM_000096     | CP               | 1356                           | 67<br>9.2<br>8  | 2.78<br>E-14 | 13.5<br>56      | 7.72<br>E-12 | P10 - ctrl; P3 - ctrl; P8 - ctrl; P10 - P11; P10 - P2; P10 - P3; P2 - P11; P3 - P11; P8 - P11; P3 - P2; P8 - P2; P8 - P3                                  |
| TC0400011180.hg.1 | TC0400011180.hg.1 | NM_001037582  | SCD5             | 79966                          | 64<br>0.5<br>7  | 3.95<br>E-14 | 13.4<br>04      | 9.86<br>E-12 | ctrl - P10; ctrl - P11; ctrl - P2; ctrl - P3; ctrl - P8; P11 - P10; P2 - P10; P3 - P10; P8 - P10; P11 - P2; P11 - P3; P11 - P8; P3 - P2; P3 - P8          |
| TC0700012754.hg.1 | TC0700012754.hg.1 | NM_020632     | ATP6V0A4         | 50617                          | 56<br>9.4<br>6  | 7.97<br>E-14 | 13.0<br>99      | 1.81<br>E-11 | ctrl - P10; P11 - ctrl; ctrl - P2; ctrl - P3; ctrl - P8; P11 - P10; P2 - P10; P3 - P10; P11 - P2; P11 - P3; P11 - P8; P2 - P3; P2 - P8; P3 - P8           |
| TC0500012470.hg.1 | TC0500012470.hg.1 | NM_001025158  | CD74             | 972                            | 55<br>1.4<br>7  | 9.65<br>E-14 | 13.0<br>15      | 2.01<br>E-11 | P10 - ctrl; P3 - ctrl; P8 - ctrl; P10 - P11; P10 - P2; P10 - P3; P3 - P11; P8 - P11; P3 - P2; P8 - P2; P8 - P3                                            |
| TC0600014273.hg.1 | TC0600014273.hg.1 | NM_001243965  | HLA-DRB1         | 3123                           | 49<br>8.8<br>2  | 1.76<br>E-13 | 12.7<br>55      | 3.38<br>E-11 | P10 - ctrl; P3 - ctrl; P8 - ctrl; P10 - P11; P10 - P2; P10 - P3; P8 - P11; P8 - P2; P8 - P3                                                               |
| TC0200009067.hg.1 | TC0200009067.hg.1 | NM_183240     | TMEM37           | 140738                         | 46<br>9.6<br>3  | 2.52<br>E-13 | 12.5<br>99      | 4.49<br>E-11 | ctrl - P10; P11 - ctrl; ctrl - P2; ctrl - P3; ctrl - P8; P11 - P10; P2 - P10; P10 - P3; P10 - P8; P11 - P2; P11 - P3; P11 - P8; P2 - P3; P2 - P8; P8 - P3 |
| TC1100013152.hg.1 | TC1100013152.hg.1 | NM_001127380  | SAA2             | 6289                           | 45<br>6.7<br>9  | 2.97<br>E-13 | 12.5<br>27      | 4.95<br>E-11 | P10 - ctrl; ctrl - P11; ctrl - P2; P3 - ctrl; P8 - ctrl; P10 - P11; P10 - P2; P10 - P3; P11 - P2; P3 - P11; P8 - P11; P3 - P2; P8 - P2; P8 - P3           |
| TC0100017084.hg.1 | TC0100017084.hg.1 | NM_001910     | CTSE             | 1510                           | 44<br>7.6       | 3.35<br>E-13 | 12.4<br>75      | 5.23<br>E-11 | P10 - ctrl; P11 - ctrl; P2 - ctrl; P3 - ctrl; P8 - ctrl; P10 - P11; P10 - P2; P10 - P3; P8 - P10; P3 - P11; P8 - P11; P3 - P2; P8 - P2; P8 - P3           |
| TC0900010106.hg.1 | TC0900010106.hg.1 | NA            | NA               | NA                             | 44<br>1.2       | 3.65<br>E-13 | 12.4<br>37      | 5.37<br>E-11 | ctrl - P10; ctrl - P11; P2 - ctrl; P3 - ctrl; ctrl - P8; P10 - P11; P2 - P10; P3 - P10; P10 - P8; P2 - P11; P3 - P11; P8 - P11; P2 - P3; P2 - P8; P3 - P8 |
| TC1500006925.hg.1 | TC1500006925.hg.1 | NM_003246     | THBS1            | 7057                           | 43<br>5.3<br>4  | 3.96<br>E-13 | 12.4<br>03      | 5.49<br>E-11 | P10 - ctrl; ctrl - P11; ctrl - P2; P3 - ctrl; P8 - ctrl; P10 - P11; P10 - P2; P3 - P10; P8 - P10; P3 - P11; P8 - P11; P3 - P2; P8 - P2; P8 - P3           |
| TC0100017310.hg.1 | TC0100017310.hg.1 | NM_001134285  | ESRRG            | 2104                           | 42<br>3.8<br>3  | 4.64<br>E-13 | 12.3<br>34      | 6.10<br>E-11 | ctrl - P10; P11 - ctrl; ctrl - P2; ctrl - P3; ctrl - P8; P11 - P10; P2 - P10; P10 - P3; P10 - P8; P11 - P2; P11 - P3; P11 - P8; P2 - P3; P2 - P8          |
| TC1200006730.hg.1 | TC1200006730.hg.1 | NM_001297776  | RIMKLB           | 57494                          | 41<br>2.5<br>6  | 5.45<br>E-13 | 12.2<br>64      | 6.81<br>E-11 | P10 - ctrl; ctrl - P11; P2 - ctrl; P3 - ctrl; P8 - ctrl; P10 - P11; P10 - P3; P10 - P8; P2 - P11; P3 - P11; P8 - P11; P3 - P2; P8 - P2; P8 - P3           |
| TC0200010627.hg.1 | TC0200010627.hg.1 | NM_001309516  | PTH2R            | 5746                           | 40<br>5.6<br>1  | 6.03<br>E-13 | 12.2<br>2       | 7.17<br>E-11 | ctrl - P10; ctrl - P11; ctrl - P2; ctrl - P3; ctrl - P8; P11 - P10; P2 - P10; P3 - P10; P11 - P2; P11 - P3; P11 - P8; P2 - P3; P2 - P8; P3 - P8           |
| TC1700006999.hg.1 | TC1700006999.hg.1 | NM_000676     | ADORA2B          | 136                            | 39<br>1.1<br>2  | 7.49<br>E-13 | 12.1<br>26      | 8.08<br>E-11 | P10 - ctrl; ctrl - P2; P3 - ctrl; P8 - ctrl; P10 - P11; P10 - P2; P8 - P10; P11 - P2; P3 - P11; P8 - P11; P3 - P2; P8 - P2; P8 - P3                       |
| TC2000009058.hg.1 | TC2000009058.hg.1 | NM_004613     | TGM2             | 7052                           | 38<br>9.6<br>6  | 7.65<br>E-13 | 12.1<br>16      | 8.08<br>E-11 | P10 - ctrl; ctrl - P2; P3 - ctrl; P8 - ctrl; P10 - P11; P10 - P2; P8 - P10; P11 - P2; P3 - P11; P8 - P11; P3 - P2; P8 - P2; P8 - P3                       |
| TC0200013861.hg.1 | TC0200013861.hg.1 | NM_005434     | MALL             | 7851                           | 38<br>8.8       | 7.76<br>E-13 | 12.1<br>1       | 8.08<br>E-11 | P10 - ctrl; ctrl - P2; P3 - ctrl; P8 - ctrl; P10 - P11; P10 - P2; P3 - P10; P8 - P10; P11 - P2; P3 - P11; P8 - P11; P3 - P2; P8 - P2; P8 - P3             |
| TC0100014988.hg.1 | TC0100014988.hg.1 | NM_001178096  | F3               | 2152                           | 38<br>8.35<br>4 | 12.0<br>E-13 | 78              | 8.35<br>E-11 | P10 - ctrl; P3 - ctrl; P8 - ctrl; P10 - P11; P10 - P2; P10 - P3; P8 - P10; P11 - P2; P3 - P11; P8 - P11; P3 - P2; P8 - P2; P8 - P3                        |
| TC0800007888.hg.1 | TC0800007888.hg.1 | NM_001195639  | C8orf34          | 116328                         | 37<br>6.4       | 9.41<br>E-13 | 12.0<br>27      | 9.04<br>E-11 | P10 - ctrl; ctrl - P11; P2 - ctrl; P3 - ctrl; P8 - ctrl; P10 - P11; P10 - P2; P10 - P3; P2 - P11; P3 - P11; P8 - P11; P3 - P2; P8 - P2; P8 - P3           |
| TC1900011967.hg.1 | TC1900011967.hg.1 | NM_001301707  | PSG9             | 5678                           | 37<br>1.9       | 1.01<br>E-12 | 11.9<br>95      | 9.12<br>E-11 | P10 - ctrl; ctrl - P11; ctrl - P2; P3 - ctrl; P8 - ctrl; P10 - P11; P10 - P2; P11 - P2; P3 - P11; P8 - P11; P3 - P2; P8 - P2                              |
| TC1200008675.hg.1 | TC1200008675.hg.1 | NM_001093771  | TXNRD1           | 7296                           | 36<br>8.3       | 1.07<br>E-12 | 11.9<br>7       | 9.12<br>E-11 | P10 - ctrl; P11 - ctrl; ctrl - P2; P3 - ctrl; P8 - ctrl; P10 - P11; P10 - P2; P8 - P10; P11 - P2; P3 - P11; P8 - P11; P3 - P2; P8 - P2; P8 - P3           |
| TC2100006834.hg.1 | TC2100006834.hg.1 | NR_126010     | LOC284825        | 284825                         | 36<br>8         | 1.08<br>E-12 | 11.9<br>68      | 9.12<br>E-11 | P10 - ctrl; P11 - ctrl; P2 - ctrl; P3 - ctrl; P8 - ctrl; P10 - P11; P10 - P2; P10 - P3; P2 - P11; P3 - P11; P8 - P11; P2 - P3; P8 - P2; P8 - P3           |
| TC0700010348.hg.1 | TC0700010348.hg.1 | NM_015464     | SOSTDC1          | 25928                          | 36<br>6.9<br>4  | 1.09<br>E-12 | 11.9<br>61      | 9.12<br>E-11 | ctrl - P10; ctrl - P2; ctrl - P3; ctrl - P8; P11 - P10; P2 - P10; P10 - P3; P11 - P2; P11 - P3; P11 - P8; P2 - P3; P2 - P8; P8 - P3                       |

|                         |                         |                               |            |        |                  |              |              |              |                                                                                                                                                                    |
|-------------------------|-------------------------|-------------------------------|------------|--------|------------------|--------------|--------------|--------------|--------------------------------------------------------------------------------------------------------------------------------------------------------------------|
| TC1100007111.hg.1       | TC1100007111.hg.1       | NM_003986                     | BBOX1      | 8424   | 35<br>9.6<br>9   | 1.23<br>E-12 | 11.9<br>09   | 9.94<br>E-11 | ctrl - P10; ctrl - P11; ctrl - P2; ctrl - P3; ctrl - P8; P11 - P10; P2 - P10; P11 - P2; P11 - P3; P11 - P8; P2 - P3; P2 - P8                                       |
| TC0800007040.hg.1       | TC0800007040.hg.1       | NM_001304351                  | ADAM28     | 10863  | 35<br>5.9<br>8   | 1.31<br>E-12 | 11.8<br>82   | 1.02<br>E-10 | P10 - ctrl; P2 - ctrl; P3 - ctrl; P8 - ctrl; P10 - P11; P10 - P2; P10 - P3; P2 - P11; P3 - P11; P8 - P11; P2 - P3; P8 - P2; P8 - P3                                |
| TC1400010618.hg.1       | TC1400010618.hg.1       | NR_039985                     | FLJ22447   | 400221 | 35<br>2.6        | 1.39<br>E-12 | 11.8<br>58   | 1.05<br>E-10 | P10 - ctrl; ctrl - P11; P3 - ctrl; P8 - ctrl; P10 - P11; P10 - P2; P8 - P10; P3 - P11; P8 - P11; P3 - P2; P8 - P2; P8 - P3                                         |
| TC1600011514.hg.1       | TC1600011514.hg.1       | NR_002473                     | SMG1P2     | 440354 | 33<br>7.0<br>9   | 1.81<br>E-12 | 11.7<br>41   | 1.33<br>E-10 | ctrl - P10; ctrl - P11; P2 - ctrl; ctrl - P3; ctrl - P8; P11 - P10; P2 - P10; P3 - P10; P10 - P8; P2 - P11; P11 - P8; P2 - P3; P2 - P8; P3 - P8                    |
| TC1100007899.hg.1       | TC1100007899.hg.1       | NM_004585                     | RARRES3    | 5920   | 33<br>3.9<br>4   | 1.92<br>E-12 | 11.7<br>17   | 1.37<br>E-10 | P10 - ctrl; P11 - ctrl; ctrl - P2; P3 - ctrl; P8 - ctrl; P10 - P11; P10 - P2; P3 - P10; P8 - P10; P11 - P2; P3 - P11; P8 - P11; P3 - P2; P8 - P2; P3 - P8          |
| TC0400011015.hg.1       | TC0400011015.hg.1       | NM_002090                     | CXCL3      | 2921   | 33<br>1.5<br>9   | 2.00<br>E-12 | 11.6<br>99   | 1.39<br>E-10 | P10 - ctrl; ctrl - P11; ctrl - P2; P3 - ctrl; P8 - ctrl; P10 - P11; P10 - P2; P10 - P3; P8 - P10; P3 - P11; P8 - P11; P3 - P2; P8 - P2; P8 - P3                    |
| TC1600007205.hg.1       | TC1600007205.hg.1       | fusny.aAug10-<br>unspliced    | fusny      | NA     | 32<br>9.1        | 2.09<br>E-12 | 11.6<br>79   | 1.41<br>E-10 | ctrl - P10; ctrl - P11; P2 - ctrl; ctrl - P3; ctrl - P8; P11 - P10; P2 - P10; P3 - P10; P10 - P8; P2 - P11; P11 - P8; P2 - P3; P2 - P8; P3 - P8                    |
| TC0400007799.hg.1       | TC0400007799.hg.1       | NM_001098484                  | SLC4A4     | 8671   | 32<br>6.1<br>7   | 2.21<br>E-12 | 11.6<br>56   | 1.45<br>E-10 | ctrl - P10; P11 - ctrl; ctrl - P2; ctrl - P3; ctrl - P8; P11 - P10; P2 - P10; P10 - P3; P10 - P8; P11 - P2; P11 - P3; P11 - P8; P2 - P3; P2 - P8; P3 - P8; P3 - P8 |
| TC2200008370.hg.1       | TC2200008370.hg.1       | NM_001079539                  | XBP1       | 7494   | 31<br>4.7<br>1   | 2.73<br>E-12 | 11.5<br>64   | 1.75<br>E-10 | P10 - ctrl; P11 - ctrl; P3 - ctrl; P8 - ctrl; P10 - P11; P10 - P2; P10 - P3; P10 - P8; P11 - P2; P11 - P3; P8 - P11; P3 - P2; P8 - P2; P8 - P3                     |
| TC1900011742.hg.1       | TC1900011742.hg.1       | NM_002483                     | CEACAM6    | 4680   | 31<br>1.0<br>1   | 2.93<br>E-12 | 11.5<br>33   | 1.83<br>E-10 | P10 - ctrl; P3 - ctrl; P8 - ctrl; P10 - P11; P10 - P2; P3 - P10; P8 - P10; P3 - P11; P8 - P11; P3 - P2; P8 - P2; P3 - P8                                           |
| TC0600007650.hg.1       | TC0600007650.hg.1       | NM_019111                     | HLA-DRA    | 3122   | 30<br>8.2<br>5   | 3.09<br>E-12 | 11.5<br>1    | 1.88<br>E-10 | P10 - ctrl; P8 - ctrl; P10 - P11; P10 - P2; P10 - P3; P8 - P11; P8 - P2; P8 - P3                                                                                   |
| TC0100012444.hg.1       | TC0100012444.hg.1       | NA                            | NA         | NA     | 30<br>6.0<br>9   | 3.22<br>E-12 | 11.4<br>92   | 1.89<br>E-10 | ctrl - P10; ctrl - P11; P2 - ctrl; ctrl - P3; ctrl - P8; P11 - P10; P2 - P10; P3 - P10; P2 - P11; P3 - P11; P11 - P8; P2 - P3; P2 - P8; P3 - P8                    |
| TC1500009355.hg.1       | TC1500009355.hg.1       | NM_203349                     | SHC4       | 399694 | 30<br>4.9<br>2   | 3.29<br>E-12 | 11.4<br>82   | 1.89<br>E-10 | P10 - ctrl; ctrl - P11; ctrl - P2; P3 - ctrl; P8 - ctrl; P10 - P11; P10 - P2; P10 - P3; P3 - P11; P8 - P11; P3 - P2; P8 - P2; P8 - P3                              |
| TC0600014083.hg.1       | TC0600014083.hg.1       | NM_021064                     | HIST1H2AG  | 8969   | 30<br>4.4<br>7   | 3.32<br>E-12 | 11.4<br>79   | 1.89<br>E-10 | P10 - ctrl; ctrl - P2; P3 - ctrl; P8 - ctrl; P10 - P11; P10 - P2; P10 - P3; P8 - P10; P11 - P2; P3 - P11; P8 - P11; P3 - P2; P8 - P2; P8 - P3                      |
| TC1600006658.hg.1       | TC1600006658.hg.1       | NM_001012631                  | IL32       | 9235   | 30<br>1.7<br>1   | 3.51<br>E-12 | 11.4<br>55   | 1.91<br>E-10 | P10 - ctrl; P2 - ctrl; P3 - ctrl; P8 - ctrl; P10 - P11; P10 - P2; P10 - P3; P8 - P10; P2 - P11; P3 - P11; P8 - P11; P3 - P2; P8 - P2; P8 - P3                      |
| TC1600011505.hg.1       | TC1600011505.hg.1       | NM_001310148                  | NPIP84     | 440345 | 29<br>9.1<br>1   | 3.69<br>E-12 | 11.4<br>33   | 1.91<br>E-10 | ctrl - P10; ctrl - P11; P2 - ctrl; ctrl - P3; ctrl - P8; P11 - P10; P2 - P10; P3 - P10; P8 - P10; P2 - P11; P11 - P8; P2 - P3; P2 - P8; P3 - P8                    |
| TC0700006890.hg.1       | TC0700006890.hg.1       | NM_000600                     | IL6        | 3569   | 29<br>7.7<br>8   | 3.79<br>E-12 | 11.4<br>21   | 1.91<br>E-10 | P10 - ctrl; ctrl - P11; ctrl - P2; P3 - ctrl; P8 - ctrl; P10 - P11; P10 - P2; P10 - P3; P11 - P2; P3 - P11; P8 - P11; P3 - P2; P8 - P2; P8 - P3                    |
| TC2000009216.hg.1       | TC2000009216.hg.1       | NM_003064                     | SLPI       | 6590   | 29<br>7.4<br>1   | 3.82<br>E-12 | 11.4<br>18   | 1.91<br>E-10 | P10 - ctrl; P11 - ctrl; P3 - ctrl; P8 - ctrl; P10 - P11; P10 - P2; P10 - P8; P11 - P2; P3 - P11; P8 - P11; P3 - P2; P8 - P2                                        |
| TC0700006468.hg.1       | TC0700006468.hg.1       | NA                            | NA         | NA     | 29<br>6.3<br>8   | 3.90<br>E-12 | 11.4<br>09   | 1.91<br>E-10 | ctrl - P10; ctrl - P11; P2 - ctrl; ctrl - P3; ctrl - P8; P11 - P10; P2 - P10; P3 - P10; P2 - P11; P11 - P8; P2 - P3; P2 - P8; P3 - P8                              |
| TC0800011064.hg.1       | TC0800011064.hg.1       | NM_004929                     | CALB1      | 793    | 29<br>5.3<br>9   | 3.98<br>E-12 | 11.4<br>11.4 | 1.91<br>E-10 | P10 - ctrl; P3 - ctrl; P8 - ctrl; P10 - P11; P10 - P2; P10 - P3; P8 - P10; P3 - P11; P8 - P11; P3 - P2; P8 - P2; P8 - P3                                           |
| TC2100007792.hg.1       | TC2100007792.hg.1       | ENST00000419694.1             | AP000221.1 |        | 29<br>4.8<br>5   | 4.02<br>E-12 | 11.3<br>96   | 1.91<br>E-10 | P10 - ctrl; ctrl - P11; P3 - ctrl; P8 - ctrl; P10 - P11; P3 - P10; P8 - P10; P2 - P11; P3 - P11; P8 - P11; P3 - P2; P8 - P2; P3 - P8                               |
| TC1100012786.hg.1       | TC1100012786.hg.1       | NM_000220                     | KCNJ1      | 3758   | 29<br>3.9<br>3   | 4.10<br>E-12 | 11.3<br>88   | 1.91<br>E-10 | ctrl - P10; ctrl - P2; ctrl - P3; ctrl - P8; P11 - P10; P2 - P10; P3 - P10; P11 - P2; P11 - P3; P11 - P8; P2 - P3; P2 - P8; P3 - P8                                |
| TSUnmapped00000976.hg.1 | TSUnmapped00000976.hg.1 | NA                            | NA         | NA     | 29<br>3.8<br>3   | 4.10<br>E-12 | 11.3<br>87   | 1.91<br>E-10 | P10 - ctrl; P3 - ctrl; P8 - ctrl; P10 - P11; P10 - P2; P10 - P3; P3 - P11; P8 - P11; P3 - P2; P8 - P2; P8 - P3                                                     |
| TC1400008705.hg.1       | TC1400008705.hg.1       | NM_001267036                  | SLC7A8     | 23428  | 29<br>2.9<br>3.6 | 4.12<br>E-12 | 11.3<br>85   | 1.91<br>E-10 | ctrl - P10; ctrl - P2; ctrl - P3; ctrl - P8; P11 - P10; P10 - P2; P11 - P2; P11 - P3; P11 - P8                                                                     |
| TC1700011813.hg.1       | TC1700011813.hg.1       | NM_001289107                  | ST6GALNAC1 | 55808  | 29<br>2.3<br>8   | 4.23<br>E-12 | 11.3<br>74   | 1.91<br>E-10 | P10 - ctrl; P11 - ctrl; P2 - ctrl; P3 - ctrl; P8 - ctrl; P10 - P11; P10 - P2; P10 - P3; P11 - P2; P11 - P3; P8 - P11; P3 - P2; P8 - P2; P8 - P3                    |
| TC0300006677.hg.1       | TC0300006677.hg.1       | NM_001134367                  | SLC6A6     | 6533   | 29<br>0.9<br>2   | 4.35<br>E-12 | 11.3<br>61   | 1.91<br>E-10 | P10 - ctrl; ctrl - P11; ctrl - P2; P3 - ctrl; P8 - ctrl; P10 - P11; P10 - P2; P10 - P3; P8 - P10; P3 - P11; P8 - P11; P3 - P2; P8 - P2; P8 - P3                    |
| TC1200010023.hg.1       | TC1200010023.hg.1       | NM_001300784                  | ERP27      | 121506 | 29<br>0.2<br>3   | 4.42<br>E-12 | 11.3<br>55   | 1.91<br>E-10 | P10 - ctrl; P11 - ctrl; ctrl - P2; ctrl - P3; P8 - ctrl; P10 - P11; P10 - P2; P10 - P3; P10 - P8; P11 - P2; P11 - P3; P11 - P8; P3 - P2; P8 - P2; P8 - P3          |
| TC0200016202.hg.1       | TC0200016202.hg.1       | NM_022449                     | RAB17      | 64284  | 29<br>0.0<br>3   | 4.43<br>E-12 | 11.3<br>53   | 1.91<br>E-10 | ctrl - P10; ctrl - P11; ctrl - P2; ctrl - P3; ctrl - P8; P11 - P10; P2 - P10; P10 - P3; P10 - P8; P11 - P2; P11 - P3; P11 - P8; P2 - P3; P2 - P8                   |
| TC0100013445.hg.1       | TC0100013445.hg.1       | NM_002038                     | IFI6       | 2537   | 28<br>4.9<br>2   | 4.93<br>E-12 | 11.3<br>07   | 2.09<br>E-10 | P10 - ctrl; ctrl - P2; P3 - ctrl; P8 - ctrl; P10 - P11; P10 - P2; P11 - P2; P3 - P11; P8 - P11; P3 - P2; P8 - P2                                                   |
| TC0800008263.hg.1       | TC0800008263.hg.1       | NM_001034915                  | ESRP1      | 54845  | 28<br>3.3<br>7   | 5.09<br>E-12 | 11.2<br>93   | 2.12<br>E-10 | ctrl - P10; P11 - ctrl; ctrl - P2; ctrl - P3; ctrl - P8; P11 - P10; P2 - P10; P3 - P10; P11 - P2; P11 - P3; P11 - P8; P3 - P2; P2 - P8; P3 - P8                    |
| TC1900008286.hg.1       | TC1900008286.hg.1       | NM_001013257                  | BCAM       | 4059   | 28<br>2.5<br>9   | 5.17<br>E-12 | 11.2<br>86   | 2.12<br>E-10 | ctrl - P10; P11 - ctrl; ctrl - P2; ctrl - P3; ctrl - P8; P11 - P10; P10 - P3; P11 - P2; P11 - P3; P11 - P8; P2 - P3; P8 - P2; P8 - P3                              |
| TC0100009542.hg.1       | TC0100009542.hg.1       | flyreebo.aAug10-<br>unspliced | flyreebo   | NA     | 28<br>0.0<br>9   | 5.45<br>E-12 | 11.2<br>63   | 2.20<br>E-10 | ctrl - P10; ctrl - P11; ctrl - P2; ctrl - P3; ctrl - P8; P11 - P10; P2 - P10; P3 - P10; P10 - P8; P2 - P11; P11 - P3; P11 - P8; P2 - P3; P2 - P8; P3 - P8          |
| TC1900006814.hg.1       | TC1900006814.hg.1       | NA                            | NA         | NA     | 27<br>8.1<br>8   | 5.68<br>E-12 | 11.2<br>46   | 2.25<br>E-10 | P10 - ctrl; P11 - ctrl; P3 - ctrl; P8 - ctrl; P10 - P11; P10 - P2; P10 - P3; P10 - P8; P11 - P2; P3 - P11; P8 - P11; P3 - P2; P8 - P2; P8 - P3                     |

|                   |                   |                                 |            |          |                |              |            |              |                                                                                                                                                           |
|-------------------|-------------------|---------------------------------|------------|----------|----------------|--------------|------------|--------------|-----------------------------------------------------------------------------------------------------------------------------------------------------------|
| TC1000011186.hg.1 | TC1000011186.hg.1 | NA                              | NA         | NA       | 27<br>7.2<br>9 | 5.79<br>E-12 | 11.2<br>37 | 2.26<br>E-10 | ctrl - P10; ctrl - P11; P2 - ctrl; ctrl - P3; ctrl - P8; P11 - P10; P2 - P10; P3 - P10; P2 - P11; P3 - P11; P11 - P8; P2 - P3; P2 - P8; P3 - P8           |
| TC2200007204.hg.1 | TC2200007204.hg.1 | NM_002133                       | HMOX1      | 3162     | 26<br>7.1<br>6 | 7.22<br>E-12 | 11.1<br>41 | 2.74<br>E-10 | P10 - ctrl; P3 - ctrl; P8 - ctrl; P10 - P11; P10 - P2; P10 - P3; P10 - P8; P3 - P11; P8 - P11; P3 - P2; P8 - P2                                           |
| TC0200008436.hg.1 | TC0200008436.hg.1 | NA                              | NA         | NA       | 26<br>6.9<br>8 | 7.25<br>E-12 | 11.1<br>4  | 2.74<br>E-10 | ctrl - P10; ctrl - P11; P2 - ctrl; P3 - ctrl; ctrl - P8; P2 - P10; P3 - P10; P2 - P11; P3 - P11; P8 - P11; P2 - P3; P2 - P8; P3 - P8                      |
| TC0400007857.hg.1 | TC0400007857.hg.1 | NM_001657                       | AREG       | 374      | 25<br>9.8<br>2 | 8.52<br>E-12 | 11.0<br>7  | 3.18<br>E-10 | P10 - ctrl; P11 - ctrl; P3 - ctrl; P8 - ctrl; P10 - P11; P10 - P2; P3 - P10; P8 - P10; P11 - P2; P3 - P11; P8 - P11; P3 - P2; P8 - P2; P8 - P3            |
| TC1500007699.hg.1 | TC1500007699.hg.1 | NM_001281301                    | KIF23      | 9493     | 25<br>7.0<br>7 | 9.07<br>E-12 | 11.0<br>42 | 3.30<br>E-10 | P10 - ctrl; ctrl - P11; ctrl - P2; P8 - ctrl; P10 - P11; P10 - P2; P10 - P3; P8 - P10; P2 - P11; P3 - P11; P8 - P11; P3 - P2; P8 - P2; P8 - P3            |
| TC0200009068.hg.1 | TC0200009068.hg.1 | miniyo.aAug10-<br>unspliced     | miniyo     | NA       | 25<br>6.2<br>9 | 9.24<br>E-12 | 11.0<br>34 | 3.30<br>E-10 | ctrl - P10; ctrl - P11; ctrl - P2; ctrl - P3; ctrl - P8; P11 - P10; P2 - P10; P10 - P3; P10 - P8; P11 - P3; P11 - P8; P2 - P3; P2 - P8                    |
| TC0100018286.hg.1 | TC0100018286.hg.1 | ENST00000369227                 | NBPF19     | 1.01E+08 | 25<br>6.2<br>4 | 9.25<br>E-12 | 11.0<br>34 | 3.30<br>E-10 | ctrl - P10; ctrl - P11; ctrl - P3; ctrl - P8; P11 - P10; P2 - P10; P3 - P10; P2 - P11; P11 - P3; P11 - P8; P2 - P3; P2 - P8; P3 - P8                      |
| TC0200016099.hg.1 | TC0200016099.hg.1 | NM_001282962                    | HJURP      | 55355    | 25<br>3.3<br>9 | 9.88<br>E-12 | 11.0<br>05 | 3.47<br>E-10 | P10 - ctrl; ctrl - P11; ctrl - P2; P8 - ctrl; P10 - P11; P10 - P2; P10 - P3; P8 - P10; P2 - P11; P3 - P11; P8 - P11; P3 - P2; P8 - P2; P8 - P3            |
| TC0200015616.hg.1 | TC0200015616.hg.1 | NM_001042599                    | ERBB4      | 2066     | 25<br>2.9<br>3 | 9.99<br>E-12 |            | 3.47<br>E-10 | ctrl - P10; P11 - ctrl; ctrl - P2; ctrl - P3; ctrl - P8; P11 - P10; P2 - P10; P10 - P3; P10 - P8; P11 - P2; P11 - P3; P11 - P8; P2 - P3; P2 - P8; P8 - P3 |
| TC1600009958.hg.1 | TC1600009958.hg.1 | ENST00000520915                 | NPIP84     | 440345   | 25<br>1.1<br>8 | 1.04<br>E-11 | 10.9<br>82 | 3.56<br>E-10 | ctrl - P10; ctrl - P11; P2 - ctrl; ctrl - P3; ctrl - P8; P11 - P10; P2 - P10; P3 - P10; P2 - P11; P11 - P8; P2 - P3; P2 - P8; P3 - P8                     |
| TC1500010618.hg.1 | TC1500010618.hg.1 | dazee.aAug10                    | dazee      |          | 25<br>0.6<br>4 | 1.05<br>E-11 | 10.9<br>77 | 3.56<br>E-10 | ctrl - P10; ctrl - P11; ctrl - P3; ctrl - P8; P11 - P10; P2 - P10; P3 - P10; P10 - P8; P2 - P11; P11 - P8; P2 - P3; P2 - P8; P3 - P8                      |
| TC0400007840.hg.1 | TC0400007840.hg.1 | NM_001511                       | CXCL1      | 2919     | 24<br>9.0<br>9 | 1.09<br>E-11 | 10.9<br>61 | 3.65<br>E-10 | P10 - ctrl; ctrl - P11; ctrl - P2; P3 - ctrl; P8 - ctrl; P10 - P11; P10 - P2; P10 - P3; P8 - P10; P2 - P11; P3 - P11; P8 - P11; P3 - P2; P8 - P2; P8 - P3 |
| TC0500011705.hg.1 | TC0500011705.hg.1 | NM_001142474                    | NREP       | 9315     | 24<br>8.0<br>7 | 1.12<br>E-11 | 10.9<br>5  | 3.67<br>E-10 | ctrl - P10; ctrl - P2; ctrl - P3; ctrl - P8; P11 - P10; P2 - P10; P3 - P10; P8 - P10; P11 - P2; P11 - P3; P11 - P8; P2 - P8; P3 - P8                      |
| TC0300013520.hg.1 | TC0300013520.hg.1 | NM_021101                       | CLDN1      | 9076     | 24<br>7.7<br>2 | 1.13<br>E-11 | 10.9<br>47 | 3.67<br>E-10 | P10 - ctrl; ctrl - P11; ctrl - P2; P3 - ctrl; P8 - ctrl; P10 - P11; P10 - P2; P10 - P3; P8 - P10; P2 - P11; P3 - P11; P8 - P11; P3 - P2; P8 - P2; P8 - P3 |
| TC1600010375.hg.1 | TC1600010375.hg.1 | NM_001308963                    | CRNDE      | 643911   | 24<br>5.8<br>4 | 1.18<br>E-11 | 10.9<br>27 | 3.79<br>E-10 | ctrl - P10; ctrl - P11; ctrl - P3; ctrl - P8; P11 - P10; P2 - P10; P10 - P3; P2 - P11; P11 - P3; P11 - P8; P2 - P3; P2 - P8; P8 - P3                      |
| TC1500007067.hg.1 | TC1500007067.hg.1 | NM_001015001                    | CKMT1A     | 548596   | 24<br>5.2<br>8 | 1.20<br>E-11 | 10.9<br>21 | 3.79<br>E-10 | P10 - ctrl; ctrl - P2; P3 - ctrl; P8 - ctrl; P10 - P11; P10 - P2; P10 - P3; P11 - P2; P3 - P11; P8 - P11; P3 - P2; P8 - P2; P8 - P3                       |
| TC0100015155.hg.1 | TC0100015155.hg.1 | NM_001079874                    | VAV3       | 10451    | 24<br>3.7<br>3 | 1.24<br>E-11 | 10.9<br>05 | 3.89<br>E-10 | ctrl - P10; ctrl - P2; ctrl - P3; ctrl - P8; P11 - P10; P2 - P10; P10 - P3; P10 - P8; P11 - P2; P11 - P3; P11 - P8; P2 - P3; P2 - P8; P3 - P8             |
| TC0400012829.hg.1 | TC0400012829.hg.1 | NM_001242729                    | ARHGEF38   | 54848    | 24<br>3.0<br>2 | 1.27<br>E-11 | 10.8<br>97 | 3.91<br>E-10 | ctrl - P10; ctrl - P11; ctrl - P2; ctrl - P3; ctrl - P8; P11 - P10; P2 - P10; P10 - P3; P10 - P8; P2 - P11; P11 - P3; P11 - P8; P2 - P3; P2 - P8; P3 - P8 |
| TC1700008719.hg.1 | TC1700008719.hg.1 | NM_002266                       | KPNA2      | 3838     | 24<br>1.9<br>6 | 1.30<br>E-11 | 10.8<br>86 | 3.93<br>E-10 | P10 - ctrl; ctrl - P11; ctrl - P2; P3 - ctrl; P8 - ctrl; P10 - P11; P10 - P2; P10 - P3; P8 - P10; P11 - P2; P3 - P11; P8 - P11; P3 - P2; P8 - P2; P8 - P3 |
| TC0600014277.hg.1 | TC0600014277.hg.1 | NM_006120                       | HLA-DMA    | 3108     | 24<br>1.6<br>2 | 1.31<br>E-11 | 10.8<br>83 | 3.93<br>E-10 | P10 - ctrl; ctrl - P2; P3 - ctrl; P8 - ctrl; P10 - P11; P10 - P2; P10 - P3; P11 - P2; P3 - P11; P8 - P11; P3 - P2; P8 - P2; P8 - P3                       |
| TC1600006946.hg.1 | TC1600006946.hg.1 | wupa.aAug10-<br>unspliced       | wupa       | NA       | 24<br>1.2<br>7 | 1.32<br>E-11 | 10.8<br>79 | 3.93<br>E-10 | ctrl - P10; ctrl - P11; P2 - ctrl; ctrl - P3; ctrl - P8; P11 - P10; P2 - P10; P3 - P10; P10 - P8; P2 - P11; P11 - P3; P11 - P8; P2 - P3; P2 - P8; P3 - P8 |
| TC0500010553.hg.1 | TC0500010553.hg.1 | NM_001243093                    | FYB        | 2533     | 23<br>9.6<br>9 | 1.37<br>E-11 | 10.8<br>62 | 4.04<br>E-10 | ctrl - P10; P11 - ctrl; ctrl - P2; ctrl - P3; ctrl - P8; P11 - P10; P2 - P10; P3 - P10; P11 - P2; P11 - P3; P11 - P8; P2 - P8; P11 - P2 - P8              |
| TC0700008182.hg.1 | TC0700008182.hg.1 | kleysmeebu.aAug10-<br>unspliced | kleysmeebu | NA       | 23<br>8.8<br>8 | 1.40<br>E-11 | 10.8<br>53 | 4.07<br>E-10 | ctrl - P10; ctrl - P11; P2 - ctrl; ctrl - P3; ctrl - P8; P11 - P10; P2 - P10; P3 - P10; P10 - P8; P2 - P11; P11 - P8; P2 - P3; P2 - P8; P3 - P8           |
| TC1100008018.hg.1 | TC1100008018.hg.1 | NR_028272                       | NEAT1      | 283131   | 23<br>7.8<br>8 | 1.44<br>E-11 | 10.8<br>42 | 4.13<br>E-10 | ctrl - P10; ctrl - P11; ctrl - P3; ctrl - P8; P11 - P10; P2 - P10; P3 - P10; P10 - P8; P2 - P11; P3 - P11; P11 - P8; P2 - P3; P2 - P8; P3 - P8            |
| TC0400012621.hg.1 | TC0400012621.hg.1 | NM_001286708                    | ACSL1      | 2180     | 23<br>6.2<br>3 | 1.50<br>E-11 | 10.8<br>24 | 4.25<br>E-10 | ctrl - P10; P11 - ctrl; ctrl - P2; ctrl - P3; ctrl - P8; P11 - P10; P10 - P3; P10 - P8; P11 - P2; P11 - P3; P11 - P8; P2 - P3; P2 - P8; P3 - P8           |
| TC0300008123.hg.1 | TC0300008123.hg.1 | ENST00000473756.1               | LINC00973  |          | 23<br>5.2<br>4 | 1.54<br>E-11 | 10.8<br>14 | 4.31<br>E-10 | P10 - ctrl; ctrl - P11; ctrl - P2; P3 - ctrl; P8 - ctrl; P10 - P11; P10 - P2; P3 - P10; P8 - P10; P3 - P11; P8 - P11; P3 - P2; P8 - P2; P3 - P8           |
| TC0100015868.hg.1 | TC0100015868.hg.1 | NM_005978                       | S100A2     | 6273     | 23<br>4.3<br>9 | 1.57<br>E-11 | 10.8<br>04 | 4.35<br>E-10 | ctrl - P10; ctrl - P2; P3 - ctrl; ctrl - P8; P11 - P10; P2 - P10; P3 - P10; P8 - P10; P11 - P2; P3 - P11; P11 - P8; P3 - P2; P2 - P8; P3 - P8             |
| TC0100010798.hg.1 | TC0100010798.hg.1 | NM_001004128                    | QSOX1      | 5768     | 23<br>4.0<br>2 | 1.58<br>E-11 | 10.8<br>10 | 4.35<br>E-10 | P10 - ctrl; ctrl - P2; P3 - ctrl; P8 - ctrl; P10 - P11; P10 - P2; P10 - P3; P11 - P2; P3 - P11; P8 - P11; P3 - P2; P8 - P2; P8 - P3                       |
| TC0200015624.hg.1 | TC0200015624.hg.1 | zoyklu.aAug10-<br>unspliced     | zoyklu     | NA       | 23<br>3.3<br>8 | 1.61<br>E-11 | 10.7<br>93 | 4.37<br>E-10 | ctrl - P10; ctrl - P11; ctrl - P3; ctrl - P8; P11 - P10; P2 - P10; P10 - P3; P10 - P8; P2 - P11; P11 - P3; P11 - P8; P2 - P3; P2 - P8; P3 - P8            |
| TC1600008890.hg.1 | TC1600008890.hg.1 | NA                              | NA         | NA       | 23<br>0.1<br>3 | 1.75<br>E-11 | 10.7<br>57 | 4.68<br>E-10 | ctrl - P10; ctrl - P11; P2 - ctrl; ctrl - P8; P10 - P11; P2 - P10; P3 - P10; P2 - P11; P3 - P11; P8 - P11; P2 - P3; P2 - P8; P3 - P8                      |
| TC0200007261.hg.1 | TC0200007261.hg.1 | NM_012413                       | QPCT       | 25797    | 22<br>9.8<br>2 | 1.76<br>E-11 | 10.7<br>54 | 4.68<br>E-10 | ctrl - P10; ctrl - P2; ctrl - P8; P11 - P10; P2 - P10; P3 - P10; P11 - P2; P11 - P8; P3 - P2; P2 - P8; P3 - P8                                            |
| TC2100007208.hg.1 | TC2100007208.hg.1 | NM_001144925                    | MX1        | 4599     | 22<br>7.9<br>4 | 1.85<br>E-11 | 10.7<br>33 | 4.87<br>E-10 | P10 - ctrl; ctrl - P11; ctrl - P2; P3 - ctrl; P8 - ctrl; P10 - P11; P10 - P2; P10 - P3; P11 - P2; P3 - P11; P8 - P11; P3 - P2; P8 - P2; P8 - P3           |

|                   |                   |                                 |                            |          |                  |              |            |              |                                                                                                                                                           |
|-------------------|-------------------|---------------------------------|----------------------------|----------|------------------|--------------|------------|--------------|-----------------------------------------------------------------------------------------------------------------------------------------------------------|
| TC0400011014.hg.1 | TC0400011014.hg.1 | NM_002994                       | CXCL5                      | 6374     | 22<br>6.3<br>9   | 1.93<br>E-11 | 10.7<br>15 | 5.02<br>E-10 | ctrl - P10; ctrl - P2; P3 - ctrl; ctrl - P8; P11 - P10; P3 - P10; P8 - P10; P11 - P2; P3 - P11; P11 - P8; P3 - P2; P8 - P2; P3 - P8                       |
| TC1000012235.hg.1 | TC1000012235.hg.1 | NM_001145966                    | MKI67                      | 4288     | 22<br>4.6<br>3   | 2.02<br>E-11 | 10.6<br>95 | 5.20<br>E-10 | P10 - ctrl; ctrl - P11; ctrl - P2; P8 - ctrl; P10 - P11; P10 - P2; P10 - P3; P8 - P10; P3 - P11; P8 - P11; P3 - P2; P8 - P2; P8 - P3                      |
| TC1900009559.hg.1 | TC1900009559.hg.1 | NM_024690                       | MUC16                      | 94025    | 22<br>4.1<br>8   | 2.04<br>E-11 | 10.6<br>9  | 5.21<br>E-10 | P10 - ctrl; P3 - ctrl; P8 - ctrl; P10 - P11; P10 - P2; P10 - P3; P8 - P10; P3 - P11; P8 - P11; P3 - P2; P8 - P2; P8 - P3                                  |
| TC2000009604.hg.1 | TC2000009604.hg.1 | NM_001255976                    | PMEPA1                     | 56937    | 22<br>3.6<br>8   | 2.07<br>E-11 | 10.6<br>84 | 5.22<br>E-10 | P10 - ctrl; ctrl - P11; P3 - ctrl; P8 - ctrl; P10 - P11; P10 - P2; P10 - P3; P8 - P10; P2 - P11; P3 - P11; P8 - P11; P3 - P2; P8 - P2; P8 - P3            |
| TC0500007974.hg.1 | TC0500007974.hg.1 | spoyplayby.aAug10-<br>unspliced | spoyplayby                 | NA       | 22<br>2.2<br>8   | 2.15<br>E-11 | 10.6<br>68 | 5.37<br>E-10 | ctrl - P10; ctrl - P11; P2 - ctrl; P3 - ctrl; ctrl - P8; P10 - P11; P2 - P10; P3 - P10; P10 - P8; P2 - P11; P3 - P11; P2 - P3; P2 - P8; P3 - P8           |
| TC0X00006799.hg.1 | TC0X00006799.hg.1 | NM_002970                       | SAT1                       | Xp22.1   | 22<br>1.9<br>3   | 2.17<br>E-11 | 10.6<br>64 | 5.37<br>E-10 | P10 - ctrl; ctrl - P11; ctrl - P2; P3 - ctrl; P8 - ctrl; P10 - P11; P10 - P2; P3 - P11; P8 - P11; P3 - P2; P8 - P2                                        |
| TC0700013427.hg.1 | TC0700013427.hg.1 | NR_036569                       | STAG3L5P-<br>PVRIG2P-PILRB | 1.02E+08 | 22<br>0.3<br>3   | 2.26<br>E-11 | 10.6<br>45 | 5.55<br>E-10 | ctrl - P10; ctrl - P11; ctrl - P2; ctrl - P3; ctrl - P8; P11 - P10; P2 - P10; P3 - P10; P2 - P11; P11 - P8; P2 - P3; P2 - P8; P3 - P8                     |
| TC0200010980.hg.1 | TC0200010980.hg.1 | NM_001130046                    | CCL20                      | 6364     | 21<br>8.9<br>8   | 2.35<br>E-11 | 10.6<br>29 | 5.70<br>E-10 | P10 - ctrl; P11 - ctrl; P2 - ctrl; P3 - ctrl; P8 - ctrl; P10 - P11; P10 - P2; P10 - P3; P8 - P10; P3 - P11; P8 - P11; P3 - P2; P8 - P2; P8 - P3           |
| TC0100009364.hg.1 | TC0100009364.hg.1 | NM_000757                       | CSF1                       | 1435     | 21<br>7.3<br>8   | 2.45<br>E-11 | 10.6<br>11 | 5.87<br>E-10 | P10 - ctrl; P11 - ctrl; ctrl - P2; P3 - ctrl; P8 - ctrl; P10 - P11; P10 - P2; P3 - P10; P8 - P10; P11 - P2; P3 - P11; P8 - P11; P3 - P2; P8 - P2; P8 - P3 |
| TC0300009853.hg.1 | TC0300009853.hg.1 | NM_006580                       | CLDN16                     | 10686    | 21<br>7.1<br>7   | 2.47<br>E-11 | 10.6<br>08 | 5.87<br>E-10 | ctrl - P10; ctrl - P11; ctrl - P2; ctrl - P3; ctrl - P8; P11 - P10; P2 - P10; P3 - P10; P11 - P2; P11 - P3; P11 - P8; P3 - P2; P2 - P8; P3 - P8           |
| TC0800007715.hg.1 | TC0800007715.hg.1 | NR_038235_2                     | LINC01606                  |          | 21<br>5.2<br>6   | 2.60<br>E-11 | 10.5<br>85 | 6.09<br>E-10 | ctrl - P10; ctrl - P11; ctrl - P2; ctrl - P3; ctrl - P8; P11 - P10; P2 - P10; P3 - P10; P11 - P2; P11 - P3; P11 - P8; P2 - P3; P2 - P8; P3 - P8           |
| TC0100014193.hg.1 | TC0100014193.hg.1 | NM_015913                       | TXNDC12                    | 51060    | 21<br>5.1<br>6   | 2.61<br>E-11 | 10.5<br>84 | 6.09<br>E-10 | P10 - ctrl; P11 - ctrl; ctrl - P2; ctrl - P3; P8 - ctrl; P10 - P11; P10 - P2; P10 - P3; P10 - P8; P11 - P2; P11 - P3; P8 - P11; P3 - P2; P8 - P2; P8 - P3 |
| TC1500010407.hg.1 | TC1500010407.hg.1 | NM_001150                       | ANPEP                      | 290      | 21<br>3.7<br>1   | 2.71<br>E-11 | 10.5<br>67 | 6.27<br>E-10 | ctrl - P10; ctrl - P11; ctrl - P2; P3 - ctrl; ctrl - P8; P11 - P10; P2 - P10; P3 - P10; P8 - P10; P3 - P11; P8 - P11; P3 - P2; P3 - P8                    |
| TC0600011938.hg.1 | TC0600011938.hg.1 | NM_001114086                    | CLIC5                      | 53405    | 21<br>2.2<br>2   | 2.83<br>E-11 | 10.5<br>49 | 6.48<br>E-10 | P10 - ctrl; ctrl - P2; P3 - ctrl; P8 - ctrl; P10 - P11; P10 - P2; P8 - P10; P3 - P11; P8 - P11; P3 - P2; P8 - P2; P8 - P3                                 |
| TC0300009139.hg.1 | TC0300009139.hg.1 | NM_004617                       | TM4SF4                     | 7104     | 21<br>1.7<br>5   | 2.86<br>E-11 | 10.5<br>43 | 6.51<br>E-10 | P10 - ctrl; ctrl - P11; P2 - ctrl; P3 - ctrl; P8 - ctrl; P10 - P11; P10 - P2; P10 - P8; P2 - P11; P3 - P11; P8 - P11; P3 - P2; P3 - P8                    |
| TC1600010168.hg.1 | TC1600010168.hg.1 | NM_024745                       | SHCBP1                     | 79801    | 20<br>9.0<br>5   | 3.09<br>E-11 | 10.5<br>1  | 6.95<br>E-10 | P10 - ctrl; ctrl - P11; ctrl - P2; P8 - ctrl; P10 - P11; P10 - P2; P10 - P3; P8 - P10; P3 - P11; P8 - P11; P3 - P2; P8 - P2; P8 - P3                      |
| TC0900011072.hg.1 | TC0900011072.hg.1 | NM_005502                       | ABCA1                      | 19       | 20<br>8.5<br>5   | 3.13<br>E-11 | 10.5<br>04 | 6.99<br>E-10 | P10 - ctrl; P11 - ctrl; P2 - ctrl; P3 - ctrl; P8 - ctrl; P10 - P11; P10 - P2; P10 - P3; P3 - P11; P8 - P11; P3 - P2; P8 - P2; P8 - P3                     |
| TC0300012236.hg.1 | TC0300012236.hg.1 | NM_033049                       | MUC13                      | 56667    | 20<br>8.2<br>7   | 3.16<br>E-11 | 10.5<br>01 | 6.99<br>E-10 | P10 - ctrl; P11 - ctrl; P2 - ctrl; P3 - ctrl; P8 - ctrl; P10 - P11; P10 - P2; P10 - P3; P10 - P8; P11 - P2; P3 - P11; P8 - P11; P3 - P2; P8 - P2; P8 - P3 |
| TC1400008677.hg.1 | TC1400008677.hg.1 | NM_001126105                    | SLC7A7                     | 9056     | 20<br>2.0<br>7.5 | 3.23<br>E-11 | 10.4<br>91 | 7.08<br>E-10 | P10 - ctrl; P11 - ctrl; P2 - ctrl; P3 - ctrl; P8 - ctrl; P10 - P11; P10 - P2; P10 - P3; P3 - P11; P8 - P11; P3 - P2; P8 - P2; P8 - P3                     |
| TC1700010618.hg.1 | TC1700010618.hg.1 | NM_001067                       | TOP2A                      | 7153     | 20<br>5.8<br>2   | 3.39<br>E-11 | 10.4<br>7  | 7.37<br>E-10 | P10 - ctrl; ctrl - P11; ctrl - P2; P3 - ctrl; P8 - ctrl; P10 - P11; P10 - P2; P10 - P3; P8 - P10; P3 - P11; P8 - P11; P3 - P2; P8 - P2; P8 - P3           |
| TC0400008137.hg.1 | TC0400008137.hg.1 | NM_001145065                    | CCSER1                     | 401145   | 20<br>4.8<br>1   | 3.49<br>E-11 | 10.4<br>58 | 7.51<br>E-10 | ctrl - P10; P11 - ctrl; ctrl - P2; ctrl - P3; ctrl - P8; P11 - P10; P2 - P10; P3 - P10; P11 - P2; P11 - P3; P11 - P8; P2 - P3; P2 - P8; P3 - P8           |
| TC2000008316.hg.1 | TC2000008316.hg.1 | NM_152611                       | LRRN4                      | 164312   | 20<br>2.7<br>1   | 3.71<br>E-11 | 10.4<br>31 | 7.87<br>E-10 | ctrl - P11; ctrl - P2; P3 - ctrl; P8 - ctrl; P10 - P11; P10 - P2; P3 - P10; P8 - P10; P11 - P2; P3 - P11; P8 - P11; P3 - P2; P8 - P2                      |
| TC0100015641.hg.1 | TC0100015641.hg.1 | NR_111936                       | PDZK1P1                    | 1E+08    | 20<br>2.6<br>2   | 3.72<br>E-11 | 10.4<br>3  | 7.87<br>E-10 | ctrl - P10; ctrl - P11; ctrl - P2; ctrl - P3; ctrl - P8; P11 - P10; P2 - P10; P10 - P3; P10 - P8; P11 - P3; P11 - P8; P2 - P3; P2 - P8                    |
| TC0400010242.hg.1 | TC0400010242.hg.1 | NM_013261                       | PPARGC1A                   | 10891    | 20<br>0.3<br>6   | 3.97<br>E-11 | 10.4<br>01 | 8.34<br>E-10 | ctrl - P10; ctrl - P2; ctrl - P3; ctrl - P8; P11 - P10; P2 - P10; P10 - P3; P10 - P8; P11 - P2; P11 - P3; P11 - P8; P2 - P3; P2 - P8; P8 - P3             |
| TC1200010145.hg.1 | TC1200010145.hg.1 | NM_001178091                    | BCAT1                      | 586      | 19<br>8.1<br>4   | 4.24<br>E-11 | 10.3<br>72 | 8.81<br>E-10 | P10 - ctrl; P3 - ctrl; P8 - ctrl; P10 - P11; P10 - P2; P10 - P3; P8 - P10; P3 - P11; P8 - P11; P3 - P2; P8 - P2; P8 - P3                                  |
| TC1500008370.hg.1 | TC1500008370.hg.1 | NM_006011                       | ST8SIA2                    | 8128     | 19<br>7.9<br>4   | 4.27<br>E-11 | 10.3<br>7  | 8.81<br>E-10 | P10 - ctrl; P11 - ctrl; P2 - ctrl; P3 - ctrl; P8 - ctrl; P10 - P11; P10 - P2; P10 - P3; P8 - P10; P11 - P2; P3 - P11; P8 - P11; P3 - P2; P8 - P2; P8 - P3 |
| TC0200016769.hg.1 | TC0200016769.hg.1 | NA                              | NA                         | NA       | 19<br>7.1<br>4   | 4.37<br>E-11 | 10.3<br>59 | 8.92<br>E-10 | ctrl - P10; ctrl - P11; ctrl - P2; ctrl - P3; ctrl - P8; P11 - P10; P2 - P10; P3 - P10; P11 - P2; P11 - P3; P11 - P8; P2 - P3; P2 - P8; P3 - P8           |
| TC1500007409.hg.1 | TC1500007409.hg.1 | NM_004751                       | GCNT3                      | 9245     | 19<br>6.9<br>9   | 4.39<br>E-11 | 10.3<br>58 | 8.92<br>E-10 | P10 - ctrl; P11 - ctrl; P2 - ctrl; P3 - ctrl; P8 - ctrl; P10 - P11; P10 - P2; P11 - P2; P3 - P11; P8 - P11; P3 - P2; P8 - P2; P8 - P3                     |
| TC1500006999.hg.1 | TC1500006999.hg.1 | NM_001243142                    | NUSAP1                     | 51203    | 19<br>6.3<br>6   | 4.47<br>E-11 | 10.3<br>49 | 9.02<br>E-10 | P10 - ctrl; ctrl - P11; ctrl - P2; ctrl - P3; P8 - ctrl; P10 - P11; P10 - P2; P10 - P3; P8 - P10; P8 - P11; P3 - P2; P8 - P2; P8 - P3                     |
| TC1900007808.hg.1 | TC1900007808.hg.1 | NA                              | NA                         | NA       | 19<br>5.5<br>5   | 4.59<br>E-11 | 10.3<br>39 | 9.17<br>E-10 | ctrl - P10; ctrl - P11; ctrl - P2; ctrl - P3; ctrl - P8; P11 - P10; P2 - P10; P3 - P10; P10 - P8; P2 - P11; P11 - P8; P2 - P3; P2 - P8; P3 - P8           |
| TC1200012748.hg.1 | TC1200012748.hg.1 | NM_001297650                    | CD163L1                    | 283316   | 19<br>3.9<br>8   | 4.81<br>E-11 | 10.3<br>18 | 9.54<br>E-10 | P10 - ctrl; P11 - ctrl; P2 - ctrl; P3 - ctrl; P8 - ctrl; P10 - P11; P10 - P2; P8 - P10; P11 - P2; P3 - P11; P8 - P11; P3 - P2; P8 - P2; P8 - P3           |
| TC1000010567.hg.1 | TC1000010567.hg.1 | charsho.aAug10-<br>unspliced    | charsho                    | NA       | 19<br>3.3<br>8   | 4.90<br>E-11 | 10.3<br>1  | 9.64<br>E-10 | ctrl - P10; ctrl - P11; P2 - ctrl; ctrl - P3; ctrl - P8; P11 - P10; P2 - P10; P3 - P10; P2 - P11; P3 - P11; P11 - P8; P2 - P3; P2 - P8; P3 - P8           |
| TC1100011375.hg.1 | TC1100011375.hg.1 | NM_001300913                    | C11orf24                   | 53838    | 19<br>2.6<br>1   | 5.01<br>E-11 | 10.3       | 9.79<br>E-10 | P10 - ctrl; ctrl - P2; P3 - ctrl; P8 - ctrl; P10 - P11; P10 - P2; P10 - P3; P8 - P10; P11 - P2; P3 - P11; P8 - P11; P3 - P2; P8 - P2; P8 - P3             |

|                   |                   |                             |               |        |           |              |            |              |                                                                                                                                                           |
|-------------------|-------------------|-----------------------------|---------------|--------|-----------|--------------|------------|--------------|-----------------------------------------------------------------------------------------------------------------------------------------------------------|
| TC0800007491.hg.1 | TC0800007491.hg.1 | NA                          | NA            | NA     | 19<br>1.8 | 5.14<br>E-11 | 10.2<br>89 | 9.95<br>E-10 | ctrl - P10; ctrl - P11; P2 - ctrl; ctrl - P8; P2 - P10; P3 - P10; P8 - P10; P2 - P11; P3 - P11; P8 - P11; P2 - P3; P2 - P8; P3 - P8                       |
| TC1200012768.hg.1 | TC1200012768.hg.1 | NM_001190726                | REERG         | 85004  | 19<br>1.5 | 5.18<br>E-11 | 10.2<br>86 | 9.95<br>E-10 | ctrl - P10; ctrl - P2; ctrl - P3; ctrl - P8; P11 - P10; P2 - P10; P3 - P10; P11 - P2; P11 - P3; P11 - P8; P2 - P3; P2 - P8; P3 - P8                       |
| TC0700010965.hg.1 | TC0700010965.hg.1 | NM_000598                   | IGFBP3        | 3486   | 19<br>1.3 | 5.21<br>E-11 | 10.2<br>83 | 9.95<br>E-10 | P10 - ctrl; P11 - ctrl; ctrl - P2; P3 - ctrl; P8 - ctrl; P10 - P11; P10 - P2; P10 - P3; P8 - P10; P11 - P2; P11 - P3; P8 - P11; P3 - P2; P8 - P2; P8 - P3 |
| TC1600010006.hg.1 | TC1600010006.hg.1 | NM_002773                   | PRSS8         | 5652   | 19<br>0.7 | 5.31<br>E-11 | 10.2<br>75 | 1.00<br>E-09 | P10 - ctrl; P11 - ctrl; ctrl - P2; ctrl - P3; P8 - ctrl; P10 - P11; P10 - P2; P10 - P3; P10 - P8; P11 - P2; P11 - P3; P8 - P11; P2 - P3; P8 - P2; P8 - P3 |
| TC0800009970.hg.1 | TC0800009970.hg.1 | NM_001278945                | PBK           | 55872  | 19<br>0.6 | 5.33<br>E-11 | 10.2<br>73 | 1.00<br>E-09 | P10 - ctrl; ctrl - P11; ctrl - P2; P3 - ctrl; P8 - ctrl; P10 - P11; P10 - P2; P10 - P3; P8 - P10; P3 - P11; P8 - P11; P3 - P2; P8 - P2; P8 - P3           |
| TC0Y00006486.hg.1 | TC0Y00006486.hg.1 | rorbor.aAug10-unspliced     | rorbor        | NA     | 19<br>0   | 5.44<br>E-11 | 10.2<br>65 | 1.01<br>E-09 | ctrl - P10; ctrl - P11; P2 - ctrl; ctrl - P3; ctrl - P8; P11 - P10; P2 - P10; P3 - P10; P10 - P8; P2 - P11; P11 - P8; P2 - P3; P2 - P8; P3 - P8           |
| TC1500009504.hg.1 | TC1500009504.hg.1 | NM_015617                   | PYGO1         | 26108  | 18<br>9.9 | 5.45<br>E-11 | 10.2<br>63 | 1.01<br>E-09 | P10 - ctrl; ctrl - P11; P3 - ctrl; P8 - ctrl; P10 - P11; P10 - P2; P10 - P3; P2 - P11; P3 - P11; P8 - P11; P3 - P2; P8 - P2; P8 - P3                      |
| TC0400007836.hg.1 | TC0400007836.hg.1 | NM_000584                   | CXCL8         | 3576   | 18<br>9.5 | 5.51<br>E-11 | 10.2<br>59 | 1.01<br>E-09 | P10 - ctrl; ctrl - P11; P3 - ctrl; P8 - ctrl; P10 - P11; P10 - P2; P8 - P10; P3 - P11; P8 - P11; P3 - P2; P8 - P2; P8 - P3                                |
| TC1200009829.hg.1 | TC1200009829.hg.1 | NM_014358                   | CLEC4E        | 26253  | 18<br>6.7 | 6.02<br>E-11 | 10.2<br>21 | 1.09<br>E-09 | P10 - ctrl; P2 - ctrl; P3 - ctrl; P8 - ctrl; P10 - P11; P10 - P2; P10 - P3; P2 - P11; P3 - P11; P8 - P11; P3 - P2; P8 - P2; P8 - P3                       |
| TC0700010604.hg.1 | TC0700010604.hg.1 | NM_019029                   | CPVL          | 54504  | 18<br>6.4 | 6.08<br>E-11 | 10.2<br>16 | 1.09<br>E-09 | ctrl - P10; ctrl - P2; ctrl - P3; ctrl - P8; P11 - P10; P2 - P10; P3 - P10; P10 - P8; P11 - P2; P11 - P3; P11 - P8; P2 - P8; P3 - P8                      |
| TC0300013076.hg.1 | TC0300013076.hg.1 | skorsweyby.aAug10-unspliced | skorsweyby    | NA     | 18<br>6.4 | 6.08<br>E-11 | 10.2<br>16 | 1.09<br>E-09 | ctrl - P10; ctrl - P11; P2 - ctrl; ctrl - P3; ctrl - P8; P11 - P10; P2 - P10; P10 - P8; P2 - P11; P11 - P3; P11 - P8; P2 - P3; P2 - P8; P3 - P8           |
| TC0400006889.hg.1 | TC0400006889.hg.1 | NA                          | NA            | NA     | 18<br>5.5 | 6.25<br>E-11 | 10.2<br>04 | 1.11<br>E-09 | P10 - ctrl; P3 - ctrl; P8 - ctrl; P10 - P11; P10 - P2; P3 - P10; P10 - P8; P3 - P11; P8 - P11; P3 - P2; P8 - P2; P3 - P8                                  |
| TC1600009929.hg.1 | TC1600009929.hg.1 | uc021tgb.2                  | RP11-231C14.4 |        | 18<br>5.1 | 6.34<br>E-11 | 10.1<br>98 | 1.12<br>E-09 | ctrl - P10; ctrl - P11; P2 - ctrl; ctrl - P3; ctrl - P8; P11 - P10; P2 - P10; P3 - P10; P8 - P10; P2 - P11; P11 - P8; P2 - P3; P2 - P8; P3 - P8           |
| TC0500011596.hg.1 | TC0500011596.hg.1 | NM_180991                   | SLCO4C1       | 353189 | 18<br>5.0 | 6.36<br>E-11 | 10.1<br>97 | 1.12<br>E-09 | ctrl - P10; ctrl - P11; ctrl - P2; ctrl - P3; ctrl - P8; P11 - P10; P10 - P3; P10 - P8; P11 - P2; P11 - P3; P11 - P8; P2 - P3; P2 - P8; P3 - P8           |
| TC0700013394.hg.1 | TC0700013394.hg.1 | NM_020879                   | CCDC146       | 57639  | 18<br>4.3 | 6.49<br>E-11 | 10.1<br>88 | 1.13<br>E-09 | P10 - ctrl; ctrl - P11; P2 - ctrl; P3 - ctrl; P8 - ctrl; P10 - P11; P10 - P2; P10 - P3; P8 - P10; P2 - P11; P3 - P11; P8 - P11; P3 - P2; P8 - P2; P8 - P3 |
| TC1300009580.hg.1 | TC1300009580.hg.1 | NM_005073                   | SLC15A1       | 6564   | 18<br>3.7 | 6.62<br>E-11 | 10.1<br>79 | 1.15<br>E-09 | P10 - ctrl; P2 - ctrl; P3 - ctrl; P8 - ctrl; P10 - P11; P10 - P2; P10 - P3; P10 - P8; P2 - P11; P3 - P11; P8 - P11; P2 - P3; P8 - P2; P8 - P3             |
| TC1300008013.hg.1 | TC1300008013.hg.1 | NA                          | NA            | NA     | 18<br>2.9 | 6.80<br>E-11 | 10.1<br>67 | 1.17<br>E-09 | ctrl - P10; ctrl - P11; P2 - ctrl; ctrl - P3; ctrl - P8; P10 - P11; P2 - P10; P10 - P8; P2 - P11; P3 - P11; P11 - P8; P2 - P3; P2 - P8; P3 - P8           |
| TC1000007471.hg.1 | TC1000007471.hg.1 | NM_000698                   | ALOX5         | 240    | 18<br>2.7 | 6.84<br>E-11 | 10.1<br>65 | 1.17<br>E-09 | P10 - ctrl; P11 - ctrl; P3 - ctrl; P8 - ctrl; P10 - P11; P10 - P2; P10 - P3; P11 - P2; P3 - P11; P8 - P11; P3 - P2; P8 - P2; P8 - P3                      |
| TC0500008777.hg.1 | TC0500008777.hg.1 | NM_005733                   | KIF20A        | 10112  | 18<br>2.4 | 6.91<br>E-11 | 10.1<br>6  | 1.18<br>E-09 | P10 - ctrl; ctrl - P11; P2 - ctrl; ctrl - P3; P8 - ctrl; P10 - P11; P10 - P2; P10 - P3; P8 - P10; P11 - P2; P3 - P11; P8 - P11; P3 - P2; P8 - P2; P8 - P3 |
| TC1800006484.hg.1 | TC1800006484.hg.1 | NM_006101                   | NDC80         | 10403  | 18<br>1.8 | 7.04<br>E-11 | 10.1<br>52 | 1.19<br>E-09 | P10 - ctrl; ctrl - P11; ctrl - P2; P8 - ctrl; P10 - P11; P10 - P2; P10 - P3; P8 - P10; P11 - P2; P3 - P11; P8 - P11; P3 - P2; P8 - P2; P8 - P3            |
| TC0100018480.hg.1 | TC0100018480.hg.1 | NM_015383                   | NBPF14        | 25832  | 18<br>1.2 | 7.17<br>E-11 | 10.1<br>44 | 1.20<br>E-09 | ctrl - P10; ctrl - P11; ctrl - P3; ctrl - P8; P11 - P10; P2 - P10; P3 - P10; P2 - P11; P11 - P3; P11 - P8; P2 - P3; P2 - P8; P3 - P8                      |
| TC1600011512.hg.1 | TC1600011512.hg.1 | NA                          | NA            | NA     | 18<br>1.1 | 7.21<br>E-11 | 10.1<br>42 | 1.20<br>E-09 | ctrl - P10; ctrl - P11; P2 - ctrl; ctrl - P3; ctrl - P8; P11 - P10; P2 - P10; P3 - P10; P2 - P11; P11 - P8; P2 - P3; P2 - P8; P3 - P8                     |
| TC1500007143.hg.1 | TC1500007143.hg.1 | NM_001198999                | SEMA6D        | 80031  | 17<br>8.5 | 7.85<br>E-11 | 10.1<br>05 | 1.30<br>E-09 | ctrl - P10; P11 - ctrl; ctrl - P2; ctrl - P3; ctrl - P8; P11 - P10; P2 - P10; P3 - P10; P11 - P2; P11 - P3; P11 - P8; P2 - P3; P2 - P8; P3 - P8           |
| TC1000011400.hg.1 | TC1000011400.hg.1 | NM_014391                   | ANKRD1        | 27063  | 17<br>8.4 | 7.88<br>E-11 | 10.1<br>03 | 1.30<br>E-09 | P10 - ctrl; P3 - ctrl; P8 - ctrl; P10 - P11; P10 - P2; P8 - P10; P3 - P11; P8 - P11; P3 - P2; P8 - P2; P8 - P3                                            |
| TC1900011233.hg.1 | TC1900011233.hg.1 | NM_001077500                | KLK10         | 5655   | 17<br>7.5 | 8.12<br>E-11 | 10.0<br>9  | 1.32<br>E-09 | P10 - ctrl; ctrl - P2; P3 - ctrl; P8 - ctrl; P10 - P11; P10 - P2; P8 - P10; P11 - P2; P3 - P11; P8 - P11; P3 - P2; P8 - P2; P8 - P3                       |
| TC1900006671.hg.1 | TC1900006671.hg.1 | NA                          | NA            | NA     | 17<br>7.4 | 8.15<br>E-11 | 10.0<br>89 | 1.32<br>E-09 | ctrl - P10; ctrl - P11; P2 - ctrl; ctrl - P3; ctrl - P8; P11 - P10; P2 - P10; P3 - P10; P2 - P11; P11 - P8; P2 - P3; P2 - P8; P3 - P8                     |
| TC0500012294.hg.1 | TC0500012294.hg.1 | NM_001278613                | PCDH1         | 5097   | 17<br>6.6 | 8.35<br>E-11 | 10.0<br>78 | 1.35<br>E-09 | P10 - ctrl; P11 - ctrl; P3 - ctrl; P8 - ctrl; P10 - P11; P10 - P2; P11 - P2; P3 - P11; P8 - P11; P3 - P2; P8 - P2                                         |
| TC0800007382.hg.1 | TC0800007382.hg.1 | NM_002164                   | IDO1          | 3620   | 17<br>5.8 | 8.59<br>E-11 | 10.0<br>66 | 1.37<br>E-09 | P10 - ctrl; P8 - ctrl; P10 - P11; P10 - P2; P10 - P3; P8 - P10; P3 - P11; P8 - P11; P3 - P2; P8 - P3                                                      |
| TC1900011741.hg.1 | TC1900011741.hg.1 | NM_001291484                | CEACAM5       | 1048   | 17<br>5.6 | 8.64<br>E-11 | 10.0<br>63 | 1.37<br>E-09 | P10 - ctrl; ctrl - P2; P3 - ctrl; P8 - ctrl; P10 - P11; P10 - P2; P3 - P10; P8 - P10; P11 - P2; P3 - P11; P8 - P11; P3 - P2; P8 - P2; P3 - P8             |
| TC0X00010155.hg.1 | TC0X00010155.hg.1 | NM_001171581                | ITM2A         | 9452   | 17<br>5.6 | 8.65<br>E-11 | 10.0<br>63 | 1.37<br>E-09 | ctrl - P10; ctrl - P2; ctrl - P3; ctrl - P8; P11 - P10; P2 - P10; P3 - P10; P8 - P10; P11 - P2; P11 - P3; P11 - P8; P3 - P2; P2 - P8; P3 - P8             |
| TC1300008095.hg.1 | TC1300008095.hg.1 | NA                          | NA            | NA     | 17<br>5.1 | 8.79<br>E-11 | 10.0<br>56 | 1.38<br>E-09 | ctrl - P10; ctrl - P11; ctrl - P3; ctrl - P8; P11 - P10; P2 - P10; P10 - P8; P2 - P11; P11 - P3; P11 - P8; P2 - P3; P2 - P8; P3 - P8                      |
| TC1200007012.hg.1 | TC1200007012.hg.1 | cheenar.aAug10-unspliced    | cheenar       | NA     | 17<br>4.7 | 8.92<br>E-11 | 10.0<br>49 | 1.39<br>E-09 | ctrl - P10; ctrl - P11; P2 - ctrl; ctrl - P8; P11 - P10; P2 - P10; P3 - P10; P10 - P8; P2 - P11; P3 - P11; P11 - P8; P2 - P3; P2 - P8; P3 - P8            |
| TC0400011013.hg.1 | TC0400011013.hg.1 | NM_002704                   | PPBP          | 5473   | 17<br>4.3 | 9.04<br>E-11 | 10.0<br>44 | 1.40<br>E-09 | P10 - ctrl; P3 - ctrl; P8 - ctrl; P10 - P11; P10 - P2; P10 - P3; P8 - P10; P3 - P11; P8 - P11; P3 - P2; P8 - P2; P8 - P3                                  |

|                       |                   |                        |                   |        |                  |              |              |              |                                                                                                                                                           |
|-----------------------|-------------------|------------------------|-------------------|--------|------------------|--------------|--------------|--------------|-----------------------------------------------------------------------------------------------------------------------------------------------------------|
| TC0500010639.hg.<br>1 | TC0500010639.hg.1 | NM_001301873           | CCL28             | 56477  | 17<br>1.4<br>6   | 9.97<br>E-11 | 10.0<br>02   | 1.54<br>E-09 | P10 - ctrl; ctrl - P2; P3 - ctrl; P8 - ctrl; P10 - P11; P10 - P2; P10 - P3; P8 - P10; P11 - P2; P3 - P11; P8 - P11; P3 - P2; P8 - P2; P3 - P8             |
| TC1900010807.hg.<br>1 | TC1900010807.hg.1 | NM_001024912           | CEACAM1           | 634    | 16<br>8.7<br>4   | 1.10<br>E-10 | 9.96<br>05   | 1.66<br>E-09 | P10 - ctrl; ctrl - P2; P3 - ctrl; P8 - ctrl; P10 - P11; P10 - P2; P3 - P10; P11 - P2; P3 - P11; P8 - P11; P3 - P2; P8 - P2; P3 - P8                       |
| TC1700012274.hg.<br>1 | TC1700012274.hg.1 | NM_000212              | ITGB3             | 3690   | 16<br>8.7        | 1.10<br>E-10 | 9.95<br>99   | 1.66<br>E-09 | P10 - ctrl; ctrl - P11; P3 - ctrl; P8 - ctrl; P10 - P11; P10 - P2; P8 - P10; P2 - P11; P3 - P11; P8 - P11; P3 - P2; P8 - P2                               |
| TC0500007044.hg.<br>1 | TC0500007044.hg.1 | NM_004932              | CDH6              | 1004   | 16<br>8.7        | 1.10<br>E-10 | 9.95<br>99   | 1.66<br>E-09 | P10 - ctrl; ctrl - P11; P3 - ctrl; P8 - ctrl; P10 - P11; P10 - P2; P3 - P10; P8 - P10; P2 - P11; P3 - P11; P8 - P11; P3 - P2; P8 - P2                     |
| TC1800008210.hg.<br>1 | TC1800008210.hg.1 | OTTHUMT00000443<br>414 | BNIP3P3           |        | 16<br>7.8<br>1   | 1.13<br>E-10 | 9.94<br>63   | 1.70<br>E-09 | ctrl - P10; ctrl - P11; P2 - ctrl; P3 - ctrl; ctrl - P8; P10 - P11; P2 - P10; P3 - P10; P10 - P8; P2 - P11; P3 - P11; P8 - P11; P2 - P3; P2 - P8; P3 - P8 |
| TC0600014106.hg.<br>1 | TC0600014106.hg.1 | NM_001710              | CFB               | 629    | 16<br>7.7<br>6   | 1.13<br>E-10 | 9.94<br>56   | 1.70<br>E-09 | P10 - ctrl; P3 - ctrl; P8 - ctrl; P10 - P11; P10 - P2; P10 - P3; P3 - P11; P8 - P11; P3 - P2; P8 - P2; P8 - P3                                            |
| TC1700007135.hg.<br>1 | TC1700007135.hg.1 | NM_001037330           | TRIM16L           | 147166 | 16<br>7.3<br>5   | 1.15<br>E-10 | 9.93<br>94   | 1.71<br>E-09 | P10 - ctrl; ctrl - P2; P3 - ctrl; P8 - ctrl; P10 - P11; P10 - P2; P8 - P10; P11 - P2; P3 - P11; P8 - P11; P3 - P2; P8 - P2; P8 - P3                       |
| TC0Y00007337.hg.1     | TC0Y00007337.hg.1 | moybu.aAug10           | moybu             | NA     | 16<br>7          | 1.16<br>E-10 | 9.93<br>39   | 1.72<br>E-09 | P10 - ctrl; ctrl - P11; P2 - ctrl; P3 - ctrl; P8 - ctrl; P10 - P11; P10 - P2; P10 - P3; P2 - P11; P3 - P11; P8 - P11; P8 - P2; P8 - P3                    |
| TC1900007465.hg.<br>1 | TC1900007465.hg.1 | NM_052852              | ZNF486            | 90649  | 16<br>6.6<br>3   | 1.18<br>E-10 | 9.92<br>83   | 1.73<br>E-09 | P10 - ctrl; ctrl - P11; P2 - ctrl; P3 - ctrl; P8 - ctrl; P10 - P11; P10 - P2; P10 - P3; P10 - P8; P2 - P11; P3 - P11; P8 - P11; P3 - P2; P8 - P2; P8 - P3 |
| TC0200006677.hg.<br>1 | TC0200006677.hg.1 | NM_001034              | RRM2              | 6241   | 16<br>6.4<br>4   | 1.19<br>E-10 | 9.92<br>54   | 1.74<br>E-09 | P10 - ctrl; ctrl - P11; ctrl - P2; P8 - ctrl; P10 - P11; P10 - P2; P10 - P3; P8 - P10; P3 - P11; P8 - P11; P3 - P2; P8 - P2; P8 - P3                      |
| TC1000008891.hg.<br>1 | TC1000008891.hg.1 | NM_004419              | DUSP5             | 1847   | 16<br>5.9<br>9   | 1.21<br>E-10 | 9.91<br>85   | 1.75<br>E-09 | P10 - ctrl; P11 - ctrl; ctrl - P2; P3 - ctrl; P8 - ctrl; P10 - P11; P10 - P2; P11 - P2; P3 - P11; P8 - P11; P3 - P2; P8 - P2                              |
| TC1600009916.hg.<br>1 | TC1600009916.hg.1 | NM_001310137           | NPIP811           | 728888 | 16<br>5.4<br>4   | 1.23<br>E-10 | 9.91<br>E-09 | 1.77<br>E-09 | ctrl - P10; ctrl - P11; P2 - ctrl; ctrl - P3; ctrl - P8; P11 - P10; P2 - P10; P3 - P10; P8 - P10; P2 - P11; P11 - P8; P2 - P3; P2 - P8; P3 - P8           |
| TC0300007915.hg.<br>1 | TC0300007915.hg.1 | ENST00000461528.<br>1  | RP11-<br>314M24.1 |        | 16<br>5.4<br>3   | 1.23<br>E-10 | 9.90<br>97   | 1.77<br>E-09 | P10 - ctrl; ctrl - P11; P2 - ctrl; ctrl - P3; P10 - P11; P2 - P10; P10 - P3; P10 - P8; P2 - P11; P11 - P3; P8 - P11; P2 - P3; P2 - P8; P8 - P3            |
| TC0700011809.hg.<br>1 | TC0700011809.hg.1 | NM_001271003           | TFPI2             | 7980   | 16<br>4.7<br>7   | 1.26<br>E-10 | 9.89<br>96   | 1.80<br>E-09 | P10 - ctrl; P11 - ctrl; P3 - ctrl; P8 - ctrl; P10 - P11; P10 - P2; P8 - P10; P11 - P2; P3 - P11; P8 - P11; P3 - P2; P8 - P2; P8 - P3                      |
| TC0500011064.hg.<br>1 | TC0500011064.hg.1 | NA                     | NA                | NA     | 16<br>3.2<br>7   | 1.33<br>E-10 | 9.87<br>61   | 1.89<br>E-09 | ctrl - P10; ctrl - P11; P2 - ctrl; ctrl - P3; ctrl - P8; P11 - P10; P2 - P10; P3 - P10; P10 - P8; P2 - P11; P11 - P8; P2 - P3; P2 - P8; P3 - P8           |
| TC0500013301.hg.<br>1 | TC0500013301.hg.1 | NM_001244871           | DAB2              | 1601   | 16<br>2.3<br>5   | 1.38<br>E-10 | 9.86<br>17   | 1.93<br>E-09 | ctrl - P10; ctrl - P2; ctrl - P3; ctrl - P8; P11 - P10; P2 - P10; P3 - P10; P11 - P2; P11 - P3; P11 - P8; P2 - P3; P8 - P3                                |
| TC0100015586.hg.<br>1 | TC0100015586.hg.1 | NM_001201325           | PDZK1             | 5174   | 16<br>2.3<br>4   | 1.38<br>E-10 | 9.86<br>15   | 1.93<br>E-09 | ctrl - P10; ctrl - P11; ctrl - P3; ctrl - P8; P11 - P10; P2 - P10; P10 - P8; P2 - P11; P11 - P3; P11 - P8; P2 - P3; P2 - P8                               |
| TC1600011501.hg.<br>1 | TC1600011501.hg.1 | NM_130464              | NPIP83            | 23117  | 16<br>1.5<br>4   | 1.42<br>E-10 | 9.84<br>88   | 1.98<br>E-09 | ctrl - P10; ctrl - P11; P2 - ctrl; ctrl - P3; ctrl - P8; P11 - P10; P2 - P10; P3 - P10; P2 - P11; P11 - P8; P2 - P3; P2 - P8; P3 - P8                     |
| TC0800010002.hg.<br>1 | TC0800010002.hg.1 | NM_001394              | DUSP4             | 1846   | 16<br>1.2<br>3   | 1.43<br>E-10 | 9.84<br>4    | 1.98<br>E-09 | P10 - ctrl; P3 - ctrl; P8 - ctrl; P10 - P11; P10 - P2; P11 - P2; P3 - P11; P8 - P11; P3 - P2; P8 - P2; P8 - P3                                            |
| TC0800007673.hg.<br>1 | TC0800007673.hg.1 | NA                     | NA                | NA     | 16<br>1.2<br>1   | 1.43<br>E-10 | 9.84<br>34   | 1.98<br>E-09 | ctrl - P10; ctrl - P11; P2 - ctrl; P3 - ctrl; ctrl - P8; P10 - P11; P2 - P10; P3 - P10; P10 - P8; P2 - P11; P3 - P11; P11 - P8; P2 - P3; P2 - P8; P3 - P8 |
| TC1800006897.hg.<br>1 | TC1800006897.hg.1 | NM_000227              | LAMA3             | 3909   | 16<br>1.0<br>3   | 1.44<br>E-10 | 9.84<br>08   | 1.98<br>E-09 | P10 - ctrl; P11 - ctrl; P3 - ctrl; P8 - ctrl; P10 - P11; P10 - P2; P3 - P10; P8 - P10; P11 - P2; P3 - P11; P8 - P11; P3 - P2; P8 - P2                     |
| TC0500007665.hg.<br>1 | TC0500007665.hg.1 | NM_031966              | CCNB1             | 891    | 16<br>0.9<br>2   | 1.45<br>E-10 | 9.83<br>9    | 1.98<br>E-09 | P10 - ctrl; ctrl - P11; ctrl - P2; P3 - ctrl; P8 - ctrl; P10 - P11; P10 - P2; P10 - P3; P8 - P10; P3 - P11; P8 - P11; P3 - P2; P8 - P2; P8 - P3           |
| TC0600011945.hg.<br>1 | TC0600011945.hg.1 | NM_001251973           | RCAN2             | 10231  | 16<br>0.7<br>2   | 1.46<br>E-10 | 9.83<br>59   | 1.98<br>E-09 | P10 - ctrl; ctrl - P11; ctrl - P2; P8 - ctrl; P10 - P11; P10 - P2; P10 - P3; P8 - P10; P3 - P11; P8 - P11; P3 - P2; P8 - P2; P8 - P3                      |
| TC1500008889.hg.<br>1 | TC1500008889.hg.1 | NA                     | NA                | NA     | 16<br>0.0<br>6   | 1.50<br>E-10 | 9.82<br>53   | 2.01<br>E-09 | ctrl - P10; ctrl - P11; P2 - ctrl; ctrl - P3; ctrl - P8; P11 - P10; P2 - P10; P3 - P10; P2 - P11; P3 - P11; P11 - P8; P2 - P3; P2 - P8; P3 - P8           |
| TC0100008812.hg.<br>1 | TC0100008812.hg.1 | NM_000959              | PTGFR             | 5737   | 15<br>9.8<br>6   | 1.51<br>E-10 | 9.82<br>21   | 2.01<br>E-09 | ctrl - P10; ctrl - P11; ctrl - P2; ctrl - P3; ctrl - P8; P11 - P10; P2 - P10; P3 - P10; P11 - P2; P11 - P3; P11 - P8; P2 - P8; P3 - P8                    |
| TC0400006538.hg.<br>1 | TC0400006538.hg.1 | NM_006342              | TACC3             | 10460  | 15<br>9.8<br>5   | 1.51<br>E-10 | 9.82<br>19   | 2.01<br>E-09 | P10 - ctrl; ctrl - P11; ctrl - P2; P8 - ctrl; P10 - P11; P10 - P2; P10 - P3; P8 - P10; P11 - P2; P3 - P11; P8 - P11; P3 - P2; P8 - P2; P8 - P3            |
| TC0900007667.hg.<br>1 | TC0900007667.hg.1 | NM_021154              | PSAT1             | 29968  | 15<br>8.7<br>6   | 1.57<br>E-10 | 9.80<br>45   | 2.07<br>E-09 | P10 - ctrl; ctrl - P2; P3 - ctrl; P8 - ctrl; P10 - P11; P10 - P2; P10 - P3; P11 - P2; P3 - P11; P8 - P11; P3 - P2; P8 - P2; P8 - P3                       |
| TC0500007738.hg.<br>1 | TC0500007738.hg.1 | NM_005909              | MAP1B             | 4131   | 15<br>8.7<br>6   | 1.57<br>E-10 | 9.80<br>44   | 2.07<br>E-09 | P10 - ctrl; ctrl - P11; P2 - ctrl; P3 - ctrl; P8 - ctrl; P10 - P11; P10 - P2; P10 - P3; P2 - P11; P3 - P11; P8 - P11; P3 - P2; P8 - P2; P8 - P3           |
| TC0300011978.hg.<br>1 | TC0300011978.hg.1 | ENST00000462510        | RP11-615J4.4      | NA     | 15<br>8.5<br>9   | 1.58<br>E-10 | 9.80<br>16   | 2.07<br>E-09 | P10 - ctrl; ctrl - P2; P3 - ctrl; P8 - ctrl; P10 - P11; P10 - P2; P10 - P3; P11 - P2; P3 - P11; P8 - P11; P3 - P2; P8 - P2; P8 - P3                       |
| TC0800007119.hg.<br>1 | TC0800007119.hg.1 | NM_001017420           | ESCO2             | 157570 | 15<br>1.5<br>8.5 | 1.58<br>E-10 | 9.80<br>03   | 2.07<br>E-09 | P10 - ctrl; ctrl - P11; ctrl - P2; P8 - ctrl; P10 - P11; P10 - P2; P10 - P3; P8 - P10; P2 - P11; P3 - P11; P8 - P11; P3 - P2; P8 - P2; P8 - P3            |
| TC0600013205.hg.<br>1 | TC0600013205.hg.1 | NM_001242350           | VNN2              | 8875   | 15<br>8.4<br>2   | 1.59<br>E-10 | 9.79<br>9    | 2.07<br>E-09 | P10 - ctrl; P2 - ctrl; P3 - ctrl; P8 - ctrl; P10 - P11; P10 - P2; P10 - P3; P10 - P8; P3 - P11; P8 - P11; P3 - P2; P8 - P2; P8 - P3                       |
| TC1000008628.hg.<br>1 | TC1000008628.hg.1 | NM_000392              | ABCC2             | 1244   | 15<br>7.9<br>6   | 1.62<br>E-10 | 9.79<br>14   | 2.09<br>E-09 | P10 - ctrl; P2 - ctrl; P3 - ctrl; P8 - ctrl; P10 - P11; P10 - P2; P3 - P10; P8 - P10; P3 - P11; P8 - P11; P3 - P2; P8 - P2; P3 - P8                       |
| TC0300014082.hg.<br>1 | TC0300014082.hg.1 | NM_004454              | ETV5              | 2119   | 15<br>7.8<br>1   | 1.63<br>E-10 | 9.78<br>91   | 2.09<br>E-09 | P10 - ctrl; P3 - ctrl; P8 - ctrl; P10 - P11; P10 - P2; P3 - P10; P8 - P10; P3 - P11; P8 - P11; P3 - P2; P8 - P2; P3 - P8                                  |

|                                        |                                        |                              |              |         |                                                                                                                                                                                                |
|----------------------------------------|----------------------------------------|------------------------------|--------------|---------|------------------------------------------------------------------------------------------------------------------------------------------------------------------------------------------------|
| TC1900007242.hg.1                      | TC1900007242.hg.1                      | NR_015379                    | UCA1         | 652995  | 15<br>7.1<br>1.66<br>9.77<br>2.13<br>P10 - ctrl; ctrl - P11; P3 - ctrl; P8 - ctrl; P10 - P11; P10 - P2; P3 - P11; P8 - P11; P3 - P2; P8 - P2                                                   |
| TC0500012017.hg.1                      | TC0500012017.hg.1                      | NM_002198                    | IRF1         | 3659    | 15<br>6.6<br>1.70<br>9.77<br>2.16<br>P10 - ctrl; P11 - ctrl; ctrl - P2; P3 - ctrl; P8 - ctrl; P10 - P11; P10 - P2; P10 - P3; P8 - P10; P11 - P2; P3 - P11; P8 - P11; P3 - P2; P8 - P2; P8 - P3 |
| TC0900009520.hg.1                      | TC0900009520.hg.1                      | NM_001040712                 | PTPRD        | 5789    | 15<br>6.3<br>1.72<br>9.76<br>2.18<br>ctrl - P10; ctrl - P11; ctrl - P2; ctrl - P3; ctrl - P8; P11 - P10; P2 - P10; P3 - P10; P11 - P2; P11 - P3; P11 - P8; P3 - P2; P2 - P8; P3 - P8           |
| TC0800008759.hg.1                      | TC0800008759.hg.1                      | NM_001039112                 | FER1L6       | 654463  | 15<br>5.8<br>1.75<br>9.75<br>2.21<br>P10 - ctrl; P11 - ctrl; P2 - ctrl; P3 - ctrl; P8 - ctrl; P10 - P11; P10 - P2; P8 - P10; P3 - P11; P8 - P11; P3 - P2; P8 - P2; P8 - P3                     |
| TC1700007319.hg.1                      | TC1700007319.hg.1                      | NM_015626                    | WSB1         | 26118   | 15<br>4.3<br>1.85<br>9.73<br>2.31<br>ctrl - P10; ctrl - P11; ctrl - P2; ctrl - P3; ctrl - P8; P10 - P11; P2 - P10; P10 - P8; P2 - P11; P3 - P11; P11 - P8; P2 - P3; P2 - P8; P3 - P8           |
| TC0400008483.hg.1                      | TC0400008483.hg.1                      | NM_001128174                 | UGT8         | 7368    | 15<br>4.3<br>1.85<br>9.73<br>2.31<br>ctrl - P10; ctrl - P2; ctrl - P3; ctrl - P8; P11 - P10; P2 - P10; P10 - P8; P11 - P2; P11 - P3; P11 - P8; P2 - P3; P2 - P8; P3 - P8                       |
| TC0900007552.hg.1                      | TC0900007552.hg.1                      | NM_001242505                 | GDA          | 9615    | 15<br>4.2<br>1.86<br>9.73<br>2.31<br>P10 - ctrl; P2 - ctrl; P3 - ctrl; P8 - ctrl; P10 - P11; P10 - P2; P10 - P3; P10 - P8; P2 - P11; P3 - P11; P8 - P11; P3 - P2; P8 - P2; P8 - P3             |
| TC1_KI270706v1_r<br>andom00006439.hg.1 | TC1_KI270706v1_r<br>andom00006439.hg.1 | ENST00000413897.2            | RP11-782C8.2 |         | 15<br>4.0<br>1.87<br>9.72<br>2.31<br>P10 - ctrl; P11 - ctrl; P2 - ctrl; P3 - ctrl; P8 - ctrl; P10 - P11; P2 - P10; P3 - P10; P8 - P10; P2 - P11; P3 - P11; P8 - P11; P3 - P2; P3 - P8          |
| TC0600008539.hg.1                      | TC0600008539.hg.1                      | NM_001159587                 | CD109        | 135228  | 15<br>3.9<br>1.88<br>9.72<br>2.31<br>P10 - ctrl; ctrl - P11; P3 - ctrl; P8 - ctrl; P10 - P11; P10 - P2; P10 - P3; P8 - P10; P2 - P11; P3 - P11; P8 - P11; P3 - P2; P8 - P2; P8 - P3            |
| TC0100007295.hg.1                      | TC0100007295.hg.1                      | NM_001309192                 | EPH82        | 2048    | 15<br>3.0<br>1.95<br>9.71<br>2.36<br>P10 - ctrl; ctrl - P11; ctrl - P2; P3 - ctrl; P8 - ctrl; P10 - P11; P10 - P2; P8 - P10; P11 - P2; P3 - P11; P8 - P11; P3 - P2; P8 - P2; P8 - P3           |
| TC0100013223.hg.1                      | TC0100013223.hg.1                      | NM_001145657                 | RAP1GAP      | 5909    | 15<br>2.9<br>1.96<br>9.70<br>2.36<br>ctrl - P10; P11 - ctrl; ctrl - P2; ctrl - P3; ctrl - P8; P11 - P10; P10 - P2; P10 - P3; P10 - P8; P11 - P2; P11 - P3; P11 - P8                            |
| TC0100016649.hg.1                      | TC0100016649.hg.1                      | NM_015039                    | NMNAT2       | 23057   | 15<br>2.8<br>1.97<br>9.70<br>2.36<br>ctrl - P10; P11 - ctrl; ctrl - P2; P3 - ctrl; ctrl - P8; P11 - P10; P3 - P10; P8 - P10; P11 - P2; P11 - P8; P3 - P2; P3 - P8                              |
| TC0300008544.hg.1                      | TC0300008544.hg.1                      | NM_000388                    | CASR         | 846     | 15<br>2.7<br>1.97<br>9.70<br>2.36<br>ctrl - P10; ctrl - P2; ctrl - P3; ctrl - P8; P11 - P10; P2 - P10; P8 - P10; P11 - P2; P11 - P3; P11 - P8; P2 - P3; P2 - P8                                |
| TC0800011611.hg.1                      | TC0800011611.hg.1                      | NM_002546                    | TNFRSF11B    | 4982    | 15<br>2.6<br>1.98<br>9.70<br>2.36<br>P10 - ctrl; P11 - ctrl; P2 - ctrl; P3 - ctrl; P8 - ctrl; P10 - P11; P10 - P2; P10 - P3; P2 - P11; P3 - P11; P8 - P11; P3 - P2; P8 - P2; P8 - P3           |
| TC1100009453.hg.1                      | TC1100009453.hg.1                      | NM_001254757                 | ST3GAL4      | 6484    | 15<br>2.6<br>1.98<br>9.70<br>2.36<br>ctrl - P10; P11 - ctrl; ctrl - P2; ctrl - P3; ctrl - P8; P11 - P10; P2 - P10; P10 - P3; P11 - P2; P11 - P3; P11 - P8; P2 - P3; P2 - P8                    |
| TC0200014819.hg.1                      | TC0200014819.hg.1                      | NM_002977                    | SCN9A        | 6335    | 15<br>2.5<br>1.98<br>9.70<br>2.36<br>ctrl - P10; ctrl - P11; ctrl - P2; ctrl - P3; ctrl - P8; P11 - P10; P2 - P10; P3 - P10; P11 - P3; P11 - P8; P2 - P3; P2 - P8; P3 - P8                     |
| TC2000008217.hg.1                      | TC2000008217.hg.1                      | NM_001174089                 | SLC4A11      | 83959   | 15<br>2.3<br>2.00<br>9.69<br>2.37<br>P10 - ctrl; ctrl - P11; ctrl - P2; P3 - ctrl; P8 - ctrl; P10 - P11; P10 - P2; P10 - P3; P8 - P10; P3 - P11; P8 - P11; P3 - P2; P8 - P2; P8 - P3           |
| TC0800010887.hg.1                      | TC0800010887.hg.1                      | NA                           | NA           | NA      | 15<br>2.1<br>2.02<br>9.69<br>2.38<br>P10 - ctrl; P8 - ctrl; P10 - P11; P10 - P2; P10 - P3; P8 - P11; P8 - P2; P8 - P3                                                                          |
| TC0100011402.hg.1                      | TC0100011402.hg.1                      | NM_000715                    | C4BPA        | 722     | 15<br>1.9<br>2.03<br>9.69<br>2.38<br>P10 - ctrl; P3 - ctrl; P8 - ctrl; P10 - P11; P10 - P2; P10 - P3; P10 - P8; P3 - P11; P8 - P11; P3 - P2; P8 - P2; P8 - P3                                  |
| TC0X00007130.hg.1                      | TC0X00007130.hg.1                      | sperfor.aAug10-<br>unspliced | sperfor      | NA      | 15<br>2.5<br>2.07<br>9.68<br>2.42<br>ctrl - P10; ctrl - P11; ctrl - P2; ctrl - P3; ctrl - P8; P11 - P10; P2 - P10; P3 - P10; P2 - P11; P11 - P8; P2 - P3; P2 - P8; P3 - P8                     |
| TC1200011991.hg.1                      | TC1200011991.hg.1                      | NM_138451                    | IQCD         | 115811  | 15<br>1.1<br>2.09<br>9.67<br>2.43<br>P10 - ctrl; ctrl - P2; P3 - ctrl; P8 - ctrl; P10 - P11; P10 - P2; P8 - P10; P11 - P2; P3 - P11; P8 - P11; P3 - P2; P8 - P2; P8 - P3                       |
| HTA2-pos-<br>PSR02023981.hg.1          | 23151074                               | NA                           | NA           | NA      | 15<br>2.5<br>2.10<br>9.67<br>2.43<br>ctrl - P10; ctrl - P11; P2 - ctrl; ctrl - P3; ctrl - P8; P11 - P10; P2 - P10; P3 - P10; P2 - P11; P11 - P8; P2 - P3; P2 - P8; P3 - P8                     |
| TC1600011507.hg.1                      | TC1600011507.hg.1                      | NPIPL3.iAug10                | NPIPL3       | NA      | 15<br>0.6<br>2.14<br>9.67<br>2.46<br>ctrl - P10; ctrl - P11; P2 - ctrl; ctrl - P3; ctrl - P8; P2 - P10; P10 - P8; P2 - P11; P11 - P3; P11 - P8; P2 - P3; P2 - P8; P3 - P8                      |
| TC0100009770.hg.1                      | TC0100009770.hg.1                      | NM_001278141                 | NBPFF12      | 149013  | 15<br>0.4<br>2.15<br>9.66<br>2.46<br>ctrl - P10; ctrl - P11; ctrl - P3; ctrl - P8; P11 - P10; P2 - P10; P3 - P10; P2 - P11; P11 - P3; P11 - P8; P2 - P3; P2 - P8; P3 - P8                      |
| TC0300012924.hg.1                      | TC0300012924.hg.1                      | NM_001167911                 | VEPH1        | 79674   | 15<br>0.4<br>2.15<br>9.66<br>2.46<br>ctrl - P10; ctrl - P2; ctrl - P3; ctrl - P8; P11 - P10; P2 - P10; P3 - P10; P11 - P2; P11 - P3; P11 - P8; P2 - P8; P3 - P8                                |
| TC1400007740.hg.1                      | TC1400007740.hg.1                      | ENST00000553613.1            | RP11-7F17.7  |         | 14<br>9.5<br>2.23<br>9.65<br>2.54<br>P10 - ctrl; P3 - ctrl; P8 - ctrl; P10 - P11; P10 - P2; P3 - P10; P8 - P10; P11 - P2; P3 - P11; P8 - P11; P3 - P2; P8 - P2                                 |
| TC0700012230.hg.1                      | TC0700012230.hg.1                      | NM_001037132                 | NRCAM        | 4897    | 14<br>9.3<br>2.25<br>9.64<br>2.55<br>P10 - ctrl; ctrl - P11; ctrl - P2; P3 - ctrl; P8 - ctrl; P10 - P11; P10 - P2; P8 - P10; P3 - P11; P8 - P11; P3 - P2; P8 - P2; P8 - P3                     |
| TC2100008391.hg.1                      | TC2100008391.hg.1                      | NA                           | NA           | NA      | 14<br>9.1<br>2.26<br>9.64<br>2.55<br>ctrl - P10; ctrl - P11; ctrl - P2; ctrl - P3; ctrl - P8; P2 - P10; P3 - P10; P10 - P8; P2 - P11; P3 - P11; P11 - P8; P2 - P3; P2 - P8; P3 - P8            |
| TC0600010626.hg.1                      | TC0600010626.hg.1                      | ENST00000566733.1            | RP1-140K8.5  |         | 14<br>8.3<br>2.34<br>9.63<br>2.62<br>ctrl - P10; P11 - ctrl; ctrl - P2; ctrl - P3; ctrl - P8; P11 - P10; P2 - P10; P10 - P3; P10 - P8; P11 - P2; P11 - P3; P11 - P8; P2 - P3; P2 - P8          |
| TC0400006994.hg.1                      | TC0400006994.hg.1                      | NM_022346                    | NCAPG        | 64151   | 14<br>8.2<br>2.35<br>9.62<br>2.62<br>P10 - ctrl; ctrl - P11; ctrl - P2; P8 - ctrl; P10 - P11; P10 - P2; P10 - P3; P8 - P10; P2 - P11; P3 - P11; P8 - P11; P3 - P2; P8 - P2; P8 - P3            |
| TC1900009744.hg.1                      | TC1900009744.hg.1                      | NR_002751                    | SNORD41      | 19p13.2 | 14<br>7.7<br>2.39<br>9.62<br>2.65<br>ctrl - P10; ctrl - P11; ctrl - P3; ctrl - P8; P11 - P10; P2 - P10; P2 - P11; P11 - P3; P11 - P8; P2 - P3; P2 - P8                                         |
| TC1000012050.hg.1                      | TC1000012050.hg.1                      | NM_000141                    | FGFR2        | 2263    | 14<br>7.3<br>2.44<br>9.61<br>2.65<br>ctrl - P10; ctrl - P2; ctrl - P3; ctrl - P8; P11 - P10; P2 - P10; P10 - P3; P11 - P2; P11 - P3; P11 - P8; P2 - P3; P2 - P8; P8 - P3                       |
| TC0300011815.hg.1                      | TC0300011815.hg.1                      | NM_080927                    | DCBLD2       | 131566  | 14<br>6.6<br>2.50<br>9.60<br>2.65<br>P10 - ctrl; ctrl - P11; ctrl - P2; P3 - ctrl; P8 - ctrl; P10 - P11; P10 - P2; P3 - P10; P8 - P10; P3 - P11; P8 - P11; P3 - P2; P8 - P2                    |

|                   |                   |                          |              |          |                |              |              |              |                                                                                                                                                           |
|-------------------|-------------------|--------------------------|--------------|----------|----------------|--------------|--------------|--------------|-----------------------------------------------------------------------------------------------------------------------------------------------------------|
| TC0300011005.hg.1 | TC0300011005.hg.1 | syfeybo.aAug10-unspliced | syfeybo      | NA       | 14<br>6.3<br>9 | 2.53<br>E-10 | 9.59<br>7    | 2.65<br>E-09 | ctrl - P10; ctrl - P11; P2 - ctrl; ctrl - P3; ctrl - P8; P2 - P10; P3 - P10; P10 - P8; P2 - P11; P3 - P11; P11 - P8; P2 - P3; P2 - P8; P3 - P8            |
| TC1300007845.hg.1 | TC1300007845.hg.1 | NM_206808                | CLYBL        | 171425   | 14<br>6.1<br>7 | 2.55<br>E-10 | 9.59<br>32   | 2.65<br>E-09 | ctrl - P10; P11 - ctrl; ctrl - P2; ctrl - P3; ctrl - P8; P11 - P10; P2 - P10; P10 - P3; P10 - P8; P11 - P2; P11 - P3; P11 - P8; P2 - P3; P2 - P8          |
| TC0600013228.hg.1 | TC0600013228.hg.1 | NM_145176                | SLC2A12      | 154091   | 14<br>6.1<br>4 | 2.55<br>E-10 | 9.59<br>27   | 2.65<br>E-09 | P10 - ctrl; ctrl - P11; ctrl - P2; ctrl - P3; P8 - ctrl; P10 - P11; P10 - P2; P10 - P3; P8 - P10; P11 - P2; P3 - P11; P8 - P11; P3 - P2; P8 - P2; P8 - P3 |
| TC0200009537.hg.1 | TC0200009537.hg.1 | NM_001032998             | KYNU         | 8942     | 14<br>6.1<br>2 | 2.56<br>E-10 | 9.59<br>23   | 2.65<br>E-09 | P10 - ctrl; P3 - ctrl; P8 - ctrl; P10 - P11; P10 - P2; P10 - P3; P3 - P11; P8 - P11; P3 - P2; P8 - P2; P8 - P3                                            |
| TC0400010125.hg.1 | TC0400010125.hg.1 | NM_005130                | FGFBP1       | 9982     | 14<br>5.9<br>9 | 2.57<br>E-10 | 9.59<br>E-09 | 2.65<br>E-09 | P10 - ctrl; ctrl - P11; ctrl - P2; P3 - ctrl; P8 - ctrl; P10 - P11; P10 - P2; P3 - P10; P8 - P10; P11 - P2; P3 - P11; P8 - P11; P3 - P2; P8 - P2; P8 - P3 |
| TC1700010767.hg.1 | TC1700010767.hg.1 | NR_002716                | RNU2-1       | 6066     | 14<br>5.8<br>7 | 2.58<br>E-10 | 9.58<br>79   | 2.65<br>E-09 | P10 - ctrl; P11 - ctrl; P2 - ctrl; P3 - ctrl; P8 - ctrl; P11 - P10; P2 - P10; P3 - P10; P2 - P11; P3 - P11; P11 - P8; P2 - P8; P3 - P8                    |
| TC1700010768.hg.1 | TC1700010768.hg.1 | NR_002716_2              | RNU2-1       |          | 14<br>5.8<br>7 | 2.58<br>E-10 | 9.58<br>79   | 2.65<br>E-09 | P10 - ctrl; P11 - ctrl; P2 - ctrl; P3 - ctrl; P8 - ctrl; P11 - P10; P2 - P10; P3 - P10; P2 - P11; P3 - P11; P11 - P8; P2 - P8; P3 - P8                    |
| TC1700010769.hg.1 | TC1700010769.hg.1 | NR_002716_3              | RNU2-1       |          | 14<br>5.8<br>7 | 2.58<br>E-10 | 9.58<br>79   | 2.65<br>E-09 | P10 - ctrl; P11 - ctrl; P2 - ctrl; P3 - ctrl; P8 - ctrl; P11 - P10; P2 - P10; P3 - P10; P2 - P11; P3 - P11; P11 - P8; P2 - P8; P3 - P8                    |
| TC1700010770.hg.1 | TC1700010770.hg.1 | NR_002716_4              | RNU2-1       |          | 14<br>5.8<br>7 | 2.58<br>E-10 | 9.58<br>79   | 2.65<br>E-09 | P10 - ctrl; P11 - ctrl; P2 - ctrl; P3 - ctrl; P8 - ctrl; P11 - P10; P2 - P10; P3 - P10; P2 - P11; P3 - P11; P11 - P8; P2 - P8; P3 - P8                    |
| TC1700010771.hg.1 | TC1700010771.hg.1 | NR_002716_5              | RNU2-1       |          | 14<br>5.8<br>7 | 2.58<br>E-10 | 9.58<br>79   | 2.65<br>E-09 | P10 - ctrl; P11 - ctrl; P2 - ctrl; P3 - ctrl; P8 - ctrl; P11 - P10; P2 - P10; P3 - P10; P2 - P11; P3 - P11; P11 - P8; P2 - P8; P3 - P8                    |
| TC1700010772.hg.1 | TC1700010772.hg.1 | NR_002716_6              | RNU2-1       |          | 14<br>5.8<br>7 | 2.58<br>E-10 | 9.58<br>79   | 2.65<br>E-09 | P10 - ctrl; P11 - ctrl; P2 - ctrl; P3 - ctrl; P8 - ctrl; P11 - P10; P2 - P10; P3 - P10; P2 - P11; P3 - P11; P11 - P8; P2 - P8; P3 - P8                    |
| TC1700010773.hg.1 | TC1700010773.hg.1 | uc060ftg.1               | U2           | NA       | 14<br>5.8<br>7 | 2.58<br>E-10 | 9.58<br>79   | 2.65<br>E-09 | P10 - ctrl; P11 - ctrl; P2 - ctrl; P3 - ctrl; P8 - ctrl; P11 - P10; P2 - P10; P3 - P10; P2 - P11; P3 - P11; P11 - P8; P2 - P8; P3 - P8                    |
| TC1700010774.hg.1 | TC1700010774.hg.1 | uc032fjc.2               | U2           | NA       | 14<br>5.8<br>7 | 2.58<br>E-10 | 9.58<br>79   | 2.65<br>E-09 | P10 - ctrl; P11 - ctrl; P2 - ctrl; P3 - ctrl; P8 - ctrl; P11 - P10; P2 - P10; P3 - P10; P2 - P11; P3 - P11; P11 - P8; P2 - P8; P3 - P8                    |
| TC1700010775.hg.1 | TC1700010775.hg.1 | NR_002716_7              | RNU2-1       |          | 14<br>5.8<br>7 | 2.58<br>E-10 | 9.58<br>79   | 2.65<br>E-09 | P10 - ctrl; P11 - ctrl; P2 - ctrl; P3 - ctrl; P8 - ctrl; P11 - P10; P2 - P10; P3 - P10; P2 - P11; P3 - P11; P11 - P8; P2 - P8; P3 - P8                    |
| TC1700010776.hg.1 | TC1700010776.hg.1 | NR_002716_8              | RNU2-1       |          | 14<br>5.8<br>7 | 2.58<br>E-10 | 9.58<br>79   | 2.65<br>E-09 | P10 - ctrl; P11 - ctrl; P2 - ctrl; P3 - ctrl; P8 - ctrl; P11 - P10; P2 - P10; P3 - P10; P2 - P11; P3 - P11; P11 - P8; P2 - P8; P3 - P8                    |
| TC1700010778.hg.1 | TC1700010778.hg.1 | NR_002716_9              | RNU2-1       |          | 14<br>5.8<br>7 | 2.58<br>E-10 | 9.58<br>79   | 2.65<br>E-09 | P10 - ctrl; P11 - ctrl; P2 - ctrl; P3 - ctrl; P8 - ctrl; P11 - P10; P2 - P10; P3 - P10; P2 - P11; P3 - P11; P11 - P8; P2 - P8; P3 - P8                    |
| TC1700010779.hg.1 | TC1700010779.hg.1 | NR_002716_10             | RNU2-1       |          | 14<br>5.8<br>7 | 2.58<br>E-10 | 9.58<br>79   | 2.65<br>E-09 | P10 - ctrl; P11 - ctrl; P2 - ctrl; P3 - ctrl; P8 - ctrl; P11 - P10; P2 - P10; P3 - P10; P2 - P11; P3 - P11; P11 - P8; P2 - P8; P3 - P8                    |
| TC1500007062.hg.1 | TC1500007062.hg.1 | NM_020990                | CKMT1B       | 1159     | 14<br>4.8<br>1 | 2.70<br>E-10 | 9.56<br>93   | 2.75<br>E-09 | P10 - ctrl; P11 - ctrl; ctrl - P2; P3 - ctrl; P8 - ctrl; P10 - P11; P10 - P2; P10 - P3; P11 - P2; P8 - P11; P3 - P2; P8 - P2; P8 - P3                     |
| TC1400008106.hg.1 | TC1400008106.hg.1 | NR_038861                | TUNAR        | 1.01E+08 | 14<br>4.3<br>8 | 2.74<br>E-10 | 9.56<br>17   | 2.79<br>E-09 | P10 - ctrl; P11 - ctrl; P2 - ctrl; P3 - ctrl; P8 - ctrl; P10 - P11; P10 - P2; P10 - P3; P8 - P10; P2 - P11; P3 - P11; P8 - P11; P3 - P2; P8 - P2; P8 - P3 |
| TC0200011138.hg.1 | TC0200011138.hg.1 | NM_000463                | UGT1A1       | 54658    | 14<br>4.1<br>1 | 2.77<br>E-10 | 9.55<br>69   | 2.81<br>E-09 | P10 - ctrl; P11 - ctrl; P2 - ctrl; P3 - ctrl; P8 - ctrl; P10 - P11; P10 - P2; P10 - P3; P11 - P2; P8 - P11; P3 - P2; P8 - P2; P8 - P3                     |
| TC1400008382.hg.1 | TC1400008382.hg.1 | NM_006291                | TNFAIP2      | 7127     | 14<br>3.9<br>1 | 2.80<br>E-10 | 9.55<br>33   | 2.82<br>E-09 | P10 - ctrl; ctrl - P11; P3 - ctrl; P8 - ctrl; P10 - P11; P10 - P2; P10 - P3; P8 - P10; P2 - P11; P3 - P11; P8 - P11; P3 - P2; P8 - P2; P8 - P3            |
| TC0500009211.hg.1 | TC0500009211.hg.1 | NM_001037333             | CYFIP2       | 26999    | 14<br>3.4<br>1 | 2.85<br>E-10 | 9.54<br>45   | 2.86<br>E-09 | ctrl - P10; P11 - ctrl; ctrl - P2; ctrl - P3; ctrl - P8; P11 - P10; P11 - P2; P11 - P3; P11 - P8                                                          |
| TC0600011232.hg.1 | TC0600011232.hg.1 | NM_005322                | HIST1H1B     | 3009     | 14<br>3.3<br>3 | 2.86<br>E-10 | 9.54<br>3    | 2.86<br>E-09 | P10 - ctrl; P3 - ctrl; P8 - ctrl; P10 - P11; P10 - P2; P10 - P3; P3 - P11; P8 - P11; P3 - P2; P8 - P2; P8 - P3                                            |
| TC1600009959.hg.1 | TC1600009959.hg.1 | NR_002453                | SMG1P5       | 595101   | 14<br>1.9<br>9 | 3.03<br>E-10 | 9.51<br>9    | 3.01<br>E-09 | ctrl - P10; ctrl - P11; P2 - ctrl; ctrl - P3; ctrl - P8; P11 - P10; P2 - P10; P10 - P8; P2 - P11; P11 - P3; P11 - P8; P2 - P3; P2 - P8                    |
| TC0800012462.hg.1 | TC0800012462.hg.1 | NR_120364                | CASC19       | 1.03E+08 | 14<br>1.7<br>8 | 3.05<br>E-10 | 9.51<br>53   | 3.03<br>E-09 | P10 - ctrl; P2 - ctrl; P3 - ctrl; P8 - ctrl; P10 - P11; P10 - P2; P3 - P10; P8 - P10; P2 - P11; P3 - P11; P8 - P11; P3 - P2; P8 - P2; P3 - P8             |
| TC1600011364.hg.1 | TC1600011364.hg.1 | NM_001135865             | NPIP85       | 1E+08    | 13<br>9.9<br>1 | 3.30<br>E-10 | 9.48<br>15   | 3.26<br>E-09 | ctrl - P10; ctrl - P11; P2 - ctrl; ctrl - P3; ctrl - P8; P11 - P10; P2 - P10; P3 - P10; P2 - P11; P11 - P8; P2 - P3; P2 - P8; P3 - P8                     |
| TC0100015234.hg.1 | TC0100015234.hg.1 | NM_001201546             | SLC16A4      | 9122     | 13<br>9.7<br>7 | 3.32<br>E-10 | 9.47<br>89   | 3.27<br>E-09 | ctrl - P10; ctrl - P2; ctrl - P8; P11 - P10; P2 - P10; P3 - P10; P11 - P2; P11 - P8; P3 - P2; P2 - P8; P3 - P8                                            |
| TC0700013623.hg.1 | TC0700013623.hg.1 | NM_001135914             | KCP          | 7q32.1   | 13<br>9.5<br>1 | 3.36<br>E-10 | 9.47<br>41   | 3.29<br>E-09 | ctrl - P10; ctrl - P11; ctrl - P2; ctrl - P3; ctrl - P8; P11 - P10; P2 - P10; P10 - P3; P10 - P8; P11 - P3; P11 - P8; P2 - P3; P2 - P8                    |
| TC1700008231.hg.1 | TC1700008231.hg.1 | OTTHUMT00000473570       | RP5-875H18.9 |          | 13<br>9.3<br>4 | 3.38<br>E-10 | 9.47<br>09   | 3.30<br>E-09 | P10 - ctrl; ctrl - P11; P3 - ctrl; P8 - ctrl; P10 - P11; P10 - P2; P3 - P10; P8 - P10; P2 - P11; P3 - P11; P8 - P11; P3 - P2; P8 - P2                     |
| TC1700008228.hg.1 | TC1700008228.hg.1 | NM_002204                | ITGA3        | 3675     | 13<br>8.9<br>8 | 3.43<br>E-10 | 9.46<br>43   | 3.34<br>E-09 | P10 - ctrl; ctrl - P2; P3 - ctrl; P8 - ctrl; P10 - P11; P10 - P2; P3 - P10; P8 - P10; P11 - P2; P3 - P11; P8 - P11; P3 - P2; P8 - P2; P3 - P8             |
| TC1700012285.hg.1 | TC1700012285.hg.1 | NM_018304                | PRR11        | 55771    | 13<br>8.6<br>8 | 3.48<br>E-10 | 9.45<br>89   | 3.36<br>E-09 | P10 - ctrl; ctrl - P11; ctrl - P2; P3 - ctrl; P8 - ctrl; P10 - P11; P10 - P2; P8 - P10; P11 - P2; P3 - P11; P8 - P11; P3 - P2; P8 - P2; P8 - P3           |
| TC0700007434.hg.1 | TC0700007434.hg.1 | NM_000596                | IGFBP1       | 3484     | 13<br>8.6<br>6 | 3.48<br>E-10 | 9.45<br>85   | 3.36<br>E-09 | P10 - ctrl; P11 - ctrl; P2 - ctrl; P3 - ctrl; P8 - ctrl; P10 - P11; P10 - P2; P10 - P3; P8 - P10; P2 - P11; P3 - P11; P8 - P11; P3 - P2; P8 - P2; P8 - P3 |



|                         |                         |                               |              |                   |                |              |            |              |                                                                                                                                                           |
|-------------------------|-------------------------|-------------------------------|--------------|-------------------|----------------|--------------|------------|--------------|-----------------------------------------------------------------------------------------------------------------------------------------------------------|
| TC0100013349.hg.1       | TC0100013349.hg.1       | NM_020317                     | RSRP1        | 1p36.1<br>3-p35.1 | 13<br>8.5<br>4 | 3.50<br>E-10 | 9.45<br>63 | 3.36<br>E-09 | ctrl - P10; ctrl - P11; ctrl - P2; ctrl - P3; ctrl - P8; P11 - P10; P2 - P10; P10 - P3; P10 - P8; P2 - P11; P11 - P3; P11 - P8; P2 - P3; P2 - P8          |
| TC0100018059.hg.1       | TC0100018059.hg.1       | NA                            | NA           | NA                | 13<br>8.3<br>7 | 3.52<br>E-10 | 9.45<br>31 | 3.36<br>E-09 | ctrl - P10; ctrl - P11; P2 - ctrl; ctrl - P3; ctrl - P8; P11 - P10; P2 - P10; P3 - P10; P10 - P8; P2 - P11; P3 - P11; P11 - P8; P2 - P3; P2 - P8; P3 - P8 |
| TC0900010261.hg.1       | TC0900010261.hg.1       | vuvybu.aAug10-<br>unspliced   | vuvybu       | NA                | 13<br>8.3<br>7 | 3.52<br>E-10 | 9.45<br>31 | 3.36<br>E-09 | ctrl - P10; ctrl - P11; P2 - ctrl; P3 - ctrl; ctrl - P8; P10 - P11; P2 - P10; P3 - P10; P10 - P8; P2 - P11; P3 - P11; P8 - P11; P2 - P3; P2 - P8; P3 - P8 |
| TC0300009774.hg.1       | TC0300009774.hg.1       | NM_000412                     | HRG          | 3273              | 13<br>7.7<br>8 | 3.61<br>E-10 | 9.44<br>23 | 3.43<br>E-09 | ctrl - P10; ctrl - P11; ctrl - P2; ctrl - P3; ctrl - P8; P11 - P10; P11 - P2; P11 - P3; P11 - P8                                                          |
| TC1500008988.hg.1       | TC1500008988.hg.1       | NM_181077                     | GOLGA8A      | 23015             | 13<br>7.7<br>2 | 3.62<br>E-10 | 9.44<br>11 | 3.43<br>E-09 | ctrl - P10; ctrl - P11; ctrl - P2; ctrl - P3; ctrl - P8; P11 - P10; P2 - P10; P3 - P10; P2 - P11; P11 - P8; P2 - P3; P2 - P8; P3 - P8                     |
| TC1500008888.hg.1       | TC1500008888.hg.1       | NA                            | NA           | NA                | 13<br>7.6<br>4 | 3.63<br>E-10 | 9.43<br>97 | 3.43<br>E-09 | ctrl - P10; ctrl - P11; P2 - ctrl; ctrl - P3; ctrl - P8; P2 - P10; P3 - P10; P10 - P8; P2 - P11; P3 - P11; P11 - P8; P2 - P3; P2 - P8; P3 - P8            |
| TC0200007976.hg.1       | TC0200007976.hg.1       | NM_001692                     | ATP6V1B1     | 2p13.1            | 13<br>7.5<br>4 | 3.65<br>E-10 | 9.43<br>77 | 3.43<br>E-09 | ctrl - P10; P11 - ctrl; ctrl - P2; ctrl - P3; ctrl - P8; P11 - P10; P11 - P2; P11 - P3; P11 - P8; P3 - P2                                                 |
| TC0900008150.hg.1       | TC0900008150.hg.1       | NM_001166116                  | TMOD1        | 7111              | 13<br>7.0<br>5 | 3.73<br>E-10 | 9.42<br>86 | 3.49<br>E-09 | P10 - ctrl; P3 - ctrl; P8 - ctrl; P10 - P11; P10 - P2; P8 - P10; P3 - P11; P8 - P11; P3 - P2; P8 - P2; P8 - P3                                            |
| TC0700013388.hg.1       | TC0700013388.hg.1       | NR_040583                     | STAG3L1      | 54441             | 13<br>6.8<br>5 | 3.76<br>E-10 | 9.42<br>51 | 3.50<br>E-09 | ctrl - P10; ctrl - P11; ctrl - P2; ctrl - P3; ctrl - P8; P11 - P10; P2 - P10; P3 - P10; P2 - P11; P11 - P8; P2 - P3; P2 - P8; P3 - P8                     |
| TC1800007471.hg.1       | TC1800007471.hg.1       | NM_021127                     | PMAIP1       | 5366              | 13<br>6.7<br>4 | 3.78<br>E-10 | 9.42<br>29 | 3.51<br>E-09 | P10 - ctrl; P11 - ctrl; ctrl - P2; P3 - ctrl; P8 - ctrl; P10 - P11; P10 - P2; P8 - P10; P11 - P2; P3 - P11; P8 - P11; P3 - P2; P8 - P2; P8 - P3           |
| TC0600014255.hg.1       | TC0600014255.hg.1       | ENST00000377050               | UBD          | 10537             | 13<br>6.6<br>1 | 3.80<br>E-10 | 9.42<br>05 | 3.51<br>E-09 | P10 - ctrl; P8 - ctrl; P10 - P11; P10 - P2; P10 - P3; P8 - P10; P8 - P11; P8 - P2; P8 - P3                                                                |
| TC0600011173.hg.1       | TC0600011173.hg.1       | NR_003504                     | GUSBP2       | 387036            | 13<br>6.5<br>2 | 3.81<br>E-10 | 9.41<br>88 | 3.52<br>E-09 | ctrl - P10; ctrl - P11; P2 - ctrl; ctrl - P3; ctrl - P8; P11 - P10; P2 - P10; P3 - P10; P10 - P8; P2 - P11; P11 - P3; P11 - P8; P2 - P3; P2 - P8; P3 - P8 |
| TC0X00010989.hg.1       | TC0X00010989.hg.1       | NM_012317                     | LDOC1        | 23641             | 13<br>6.2<br>9 | 3.85<br>E-10 | 9.41<br>45 | 3.54<br>E-09 | ctrl - P10; ctrl - P2; ctrl - P3; ctrl - P8; P11 - P10; P3 - P10; P11 - P2; P11 - P3; P11 - P8; P3 - P2; P3 - P8                                          |
| TC0900008891.hg.1       | TC0900008891.hg.1       | NM_001127244                  | LRRCA8A      | 56262             | 13<br>6.1<br>7 | 3.87<br>E-10 | 9.41<br>23 | 3.54<br>E-09 | P10 - ctrl; ctrl - P2; P3 - ctrl; P8 - ctrl; P10 - P11; P10 - P2; P3 - P10; P8 - P10; P11 - P2; P3 - P11; P8 - P11; P3 - P2; P8 - P2                      |
| TC1200006896.hg.1       | TC1200006896.hg.1       | NM_003979                     | GPRC5A       | 9052              | 13<br>6.1<br>3 | 3.88<br>E-10 | 9.41<br>16 | 3.54<br>E-09 | P10 - ctrl; ctrl - P2; P3 - ctrl; P8 - ctrl; P10 - P11; P10 - P2; P11 - P2; P3 - P11; P8 - P11; P3 - P2; P8 - P2; P8 - P3                                 |
| TC0100008057.hg.1       | TC0100008057.hg.1       | NM_001255                     | CDC20        | 991               | 13<br>5.8<br>8 | 3.92<br>E-10 | 9.40<br>68 | 3.55<br>E-09 | P10 - ctrl; ctrl - P11; ctrl - P2; P8 - ctrl; P10 - P11; P10 - P2; P10 - P3; P8 - P10; P3 - P11; P8 - P11; P3 - P2; P8 - P2; P8 - P3                      |
| TC2200007356.hg.1       | TC2200007356.hg.1       | NM_006855                     | KDELRL3      | 11015             | 13<br>5.8<br>7 | 3.92<br>E-10 | 9.40<br>67 | 3.55<br>E-09 | P10 - ctrl; ctrl - P11; ctrl - P2; P3 - ctrl; P8 - ctrl; P10 - P11; P10 - P2; P3 - P10; P8 - P10; P11 - P2; P3 - P11; P8 - P11; P3 - P2; P8 - P2          |
| TC0500012138.hg.1       | TC0500012138.hg.1       | NM_004598                     | SPOCK1       | 5q31.2            | 13<br>5.5<br>5 | 3.98<br>E-10 | 9.39<br>97 | 3.59<br>E-09 | ctrl - P10; ctrl - P2; P3 - ctrl; ctrl - P8; P11 - P10; P2 - P10; P3 - P10; P11 - P2; P3 - P11; P11 - P8; P3 - P2; P2 - P8; P3 - P8                       |
| TC0400011738.hg.1       | TC0400011738.hg.1       | NM_198179                     | QRFRP        | 84109             | 13<br>5.4<br>4 | 3.99<br>E-10 | 9.39<br>85 | 3.59<br>E-09 | ctrl - P10; P11 - ctrl; ctrl - P2; ctrl - P3; ctrl - P8; P11 - P10; P2 - P10; P3 - P10; P8 - P10; P11 - P2; P11 - P3; P11 - P8; P3 - P2; P2 - P8; P3 - P8 |
| TC1800006592.hg.1       | TC1800006592.hg.1       | leeterbu.aAug10-<br>unspliced | leeterbu     | NA                | 13<br>5.3<br>7 | 4.01<br>E-10 | 9.39<br>72 | 3.59<br>E-09 | ctrl - P10; ctrl - P11; P2 - ctrl; ctrl - P3; ctrl - P8; P2 - P10; P3 - P10; P10 - P8; P2 - P11; P3 - P11; P11 - P8; P2 - P3; P2 - P8; P3 - P8            |
| TC2100007543.hg.1       | TC2100007543.hg.1       | ENST00000624041               | bP-21264C1.1 | NA                | 13<br>5.0<br>3 | 4.07<br>E-10 | 9.39<br>08 | 3.63<br>E-09 | P10 - ctrl; P2 - ctrl; P3 - ctrl; P8 - ctrl; P10 - P11; P2 - P10; P3 - P10; P8 - P10; P2 - P11; P3 - P11; P8 - P11; P3 - P2; P2 - P8; P3 - P8             |
| TC1700010994.hg.1       | TC1700010994.hg.1       | skozy.aAug10-<br>unspliced    | skozy        | NA                | 13<br>4.7<br>8 | 4.11<br>E-10 | 9.38<br>61 | 3.66<br>E-09 | ctrl - P10; ctrl - P11; ctrl - P3; ctrl - P8; P11 - P10; P2 - P10; P3 - P10; P2 - P11; P11 - P3; P11 - P8; P2 - P3; P2 - P8; P3 - P8                      |
| TC0800010716.hg.1       | TC0800010716.hg.1       | NR_038877                     | C8orf34-AS1  | 286189            | 13<br>4.2<br>4 | 4.21<br>E-10 | 9.37<br>59 | 3.73<br>E-09 | P10 - ctrl; ctrl - P11; P2 - ctrl; P3 - ctrl; P8 - ctrl; P10 - P11; P10 - P2; P10 - P3; P2 - P11; P3 - P11; P8 - P11; P3 - P2; P8 - P2; P8 - P3           |
| TC1100011602.hg.1       | TC1100011602.hg.1       | NM_003355                     | UCP2         | 7351              | 13<br>4.0<br>9 | 4.24<br>E-10 | 9.37<br>3  | 3.74<br>E-09 | P10 - ctrl; ctrl - P11; ctrl - P2; P3 - ctrl; P8 - ctrl; P10 - P11; P10 - P2; P10 - P3; P2 - P11; P3 - P11; P8 - P11; P3 - P2; P8 - P2; P8 - P3           |
| TC1600009917.hg.1       | TC1600009917.hg.1       | NA                            | NA           | NA                | 13<br>3.7<br>1 | 4.31<br>E-10 | 9.36<br>58 | 3.79<br>E-09 | ctrl - P10; ctrl - P11; P2 - ctrl; ctrl - P3; ctrl - P8; P11 - P10; P2 - P10; P3 - P10; P8 - P10; P2 - P11; P11 - P3; P11 - P8; P2 - P3; P2 - P8; P3 - P8 |
| TC0900007815.hg.1       | TC0900007815.hg.1       | warteyby.aAug10-<br>unspliced | warteyby     | NA                | 13<br>3.5<br>9 | 4.33<br>E-10 | 9.36<br>35 | 3.80<br>E-09 | ctrl - P10; ctrl - P11; ctrl - P3; ctrl - P8; P11 - P10; P2 - P10; P3 - P10; P2 - P11; P11 - P8; P2 - P3; P2 - P8; P3 - P8                                |
| TC0500009603.hg.1       | TC0500009603.hg.1       | NM_133369                     | UNC5A        | 90249             | 13<br>2.6<br>5 | 4.51<br>E-10 | 9.34<br>55 | 3.94<br>E-09 | P10 - ctrl; ctrl - P2; P3 - ctrl; P8 - ctrl; P10 - P11; P10 - P2; P10 - P3; P8 - P10; P11 - P2; P3 - P11; P8 - P11; P3 - P2; P8 - P2; P8 - P3             |
| TC1200008921.hg.1       | TC1200008921.hg.1       | NM_001032731                  | OAS2         | 4939              | 13<br>2.5<br>9 | 4.53<br>E-10 | 9.34<br>44 | 3.94<br>E-09 | P10 - ctrl; P11 - ctrl; P3 - ctrl; P8 - ctrl; P10 - P11; P10 - P2; P10 - P3; P11 - P2; P3 - P11; P8 - P11; P3 - P2; P8 - P2; P8 - P3                      |
| TC0300008839.hg.1       | TC0300008839.hg.1       | NM_001099                     | ACPP         | 55                | 13<br>2.3<br>7 | 4.57<br>E-10 | 9.34<br>01 | 3.96<br>E-09 | ctrl - P10; ctrl - P2; ctrl - P3; ctrl - P8; P11 - P10; P2 - P10; P3 - P10; P11 - P2; P11 - P3; P11 - P8; P2 - P3; P2 - P8; P3 - P8                       |
| TC0200013912.hg.1       | TC0200013912.hg.1       | NM_001304361                  | CKAP2L       | 150468            | 13<br>2.3<br>2 | 4.58<br>E-10 | 9.33<br>91 | 3.96<br>E-09 | P10 - ctrl; ctrl - P11; ctrl - P2; P8 - ctrl; P10 - P11; P10 - P2; P10 - P3; P8 - P10; P3 - P11; P8 - P11; P3 - P2; P8 - P2; P8 - P3                      |
| TSUnmapped00000784.hg.1 | TSUnmapped00000784.hg.1 | ENST00000631074               | PADI1        | 29943             | 13<br>1.5<br>8 | 4.73<br>E-10 | 9.32<br>49 | 4.07<br>E-09 | P10 - ctrl; P3 - ctrl; P8 - ctrl; P10 - P11; P10 - P2; P8 - P10; P3 - P11; P8 - P11; P3 - P2; P8 - P2                                                     |
| TC1800008349.hg.1       | TC1800008349.hg.1       | NM_001256316                  | CHST9        | 83539             | 13<br>1.5<br>4 | 4.74<br>E-10 | 9.32<br>4  | 4.07<br>E-09 | ctrl - P10; ctrl - P8; P11 - P10; P2 - P10; P3 - P10; P8 - P10; P11 - P8; P2 - P8; P3 - P8                                                                |
| TC0800010397.hg.1       | TC0800010397.hg.1       | ENST00000518968               | PSAT1P1      | NA                | 13<br>1.1<br>8 | 4.82<br>E-10 | 9.31<br>72 | 4.12<br>E-09 | P10 - ctrl; P3 - ctrl; P8 - ctrl; P10 - P11; P10 - P2; P10 - P3; P3 - P11; P8 - P11; P3 - P2; P8 - P2; P8 - P3                                            |

|                   |                   |                              |               |        |                   |              |              |              |                                                                                                                                                           |
|-------------------|-------------------|------------------------------|---------------|--------|-------------------|--------------|--------------|--------------|-----------------------------------------------------------------------------------------------------------------------------------------------------------|
| TC0300007191.hg.1 | TC0300007191.hg.1 | ENST00000462240              | RN7SL517P     |        | 13<br>0.3<br>7    | 5.00<br>E-10 | 9.30<br>13   | 4.26<br>E-09 | ctrl - P10; ctrl - P11; ctrl - P3; ctrl - P8; P11 - P10; P2 - P10; P3 - P10; P10 - P8; P2 - P11; P11 - P3; P11 - P8; P2 - P3; P2 - P8; P3 - P8            |
| TC0600007847.hg.1 | TC0600007847.hg.1 | NM_000389                    | CDKN1A        | 1026   | 13<br>0.2<br>6    | 5.02<br>E-10 | 9.29<br>9    | 4.27<br>E-09 | P10 - ctrl; P11 - ctrl; P3 - ctrl; P8 - ctrl; P10 - P2; P11 - P2; P3 - P2; P8 - P2                                                                        |
| TC0100014081.hg.1 | TC0100014081.hg.1 | NM_005764                    | PDZK1IP1      | 10158  | 13<br>0.1<br>6    | 5.04<br>E-09 | 9.29<br>73   | 4.27<br>E-09 | P10 - ctrl; ctrl - P2; P3 - ctrl; P8 - ctrl; P10 - P11; P10 - P2; P10 - P3; P11 - P2; P3 - P11; P8 - P11; P3 - P2; P8 - P2; P8 - P3                       |
| TC0800010382.hg.1 | TC0800010382.hg.1 | NM_003068                    | SNAI2         | 6591   | 13<br>0.1<br>E-10 | 5.06<br>E-10 | 9.29<br>6    | 4.27<br>E-09 | P10 - ctrl; P3 - ctrl; P8 - ctrl; P10 - P11; P10 - P2; P10 - P3; P3 - P11; P8 - P11; P3 - P2; P8 - P2; P8 - P3                                            |
| TC0200012163.hg.1 | TC0200012163.hg.1 | NM_000379                    | XDH           | 7498   | 12<br>9.7<br>9    | 5.13<br>E-10 | 9.28<br>99   | 4.31<br>E-09 | P10 - ctrl; P3 - ctrl; P8 - ctrl; P10 - P11; P10 - P2; P3 - P11; P8 - P11; P3 - P2; P8 - P2                                                               |
| TC1600011375.hg.1 | TC1600011375.hg.1 | NM_014298                    | QPRT          | 23475  | 12<br>9.7<br>2    | 5.15<br>E-10 | 9.28<br>86   | 4.31<br>E-09 | ctrl - P10; ctrl - P11; ctrl - P2; ctrl - P8; P11 - P10; P2 - P10; P3 - P10; P8 - P10; P11 - P2; P11 - P8; P3 - P2; P3 - P8                               |
| TC0500011528.hg.1 | TC0500011528.hg.1 | NM_153234                    | LIX1          | 167410 | 12<br>9.6<br>2    | 5.17<br>E-10 | 9.28<br>66   | 4.31<br>E-09 | ctrl - P10; ctrl - P11; ctrl - P2; ctrl - P8; P11 - P10; P2 - P10; P3 - P10; P8 - P10; P11 - P2; P11 - P3; P11 - P8; P3 - P2; P2 - P8; P3 - P8            |
| TC0400011748.hg.1 | TC0400011748.hg.1 | NM_001237                    | CCNA2         | 890    | 12<br>5.17<br>9.6 | 9.28<br>E-10 | 4.31<br>62   | E-09         | P10 - ctrl; ctrl - P11; ctrl - P2; P8 - ctrl; P10 - P11; P10 - P2; P10 - P3; P8 - P10; P3 - P11; P8 - P11; P3 - P2; P8 - P2; P8 - P3                      |
| TC1800008094.hg.1 | TC1800008094.hg.1 | ENST00000609238.1            | RP11-78A19.4  |        | 12<br>9.3<br>7    | 5.23<br>E-10 | 9.28<br>17   | 4.34<br>E-09 | P10 - ctrl; ctrl - P11; P3 - ctrl; P8 - ctrl; P10 - P11; P10 - P2; P10 - P3; P2 - P11; P3 - P11; P8 - P11; P3 - P2; P8 - P2; P8 - P3                      |
| TC0700011953.hg.1 | TC0700011953.hg.1 | NM_000777                    | CYP3A5        | 1577   | 12<br>8.3<br>9    | 5.47<br>E-10 | 9.26<br>22   | 4.52<br>E-09 | P10 - ctrl; P3 - ctrl; P8 - ctrl; P10 - P11; P10 - P2; P3 - P10; P8 - P10; P2 - P11; P3 - P11; P8 - P11; P3 - P2; P8 - P2; P3 - P8                        |
| TC1500010369.hg.1 | TC1500010369.hg.1 | NM_001114614                 | MFGE8         | 4240   | 12<br>7.9<br>7    | 5.59<br>E-10 | 9.25<br>26   | 4.61<br>E-09 | P10 - ctrl; ctrl - P11; ctrl - P2; P3 - ctrl; P8 - ctrl; P10 - P11; P10 - P2; P10 - P3; P3 - P11; P8 - P11; P3 - P2; P8 - P2; P8 - P3                     |
| TC1400009248.hg.1 | TC1400009248.hg.1 | NM_001146015                 | DLGAP5        | 9787   | 12<br>7.2<br>8    | 5.75<br>E-10 | 9.24<br>02   | 4.70<br>E-09 | P10 - ctrl; ctrl - P11; ctrl - P2; P8 - ctrl; P10 - P11; P10 - P2; P10 - P3; P8 - P10; P11 - P2; P3 - P11; P8 - P11; P3 - P2; P8 - P2; P8 - P3            |
| TC0900011305.hg.1 | TC0900011305.hg.1 | NM_002160                    | TNC           | 3371   | 12<br>7.1<br>9    | 5.78<br>E-10 | 9.23<br>84   | 4.70<br>E-09 | ctrl - P10; ctrl - P11; ctrl - P2; P3 - ctrl; ctrl - P8; P11 - P10; P2 - P10; P3 - P10; P8 - P10; P3 - P11; P8 - P11; P3 - P2; P8 - P2; P3 - P8           |
| TC0500013189.hg.1 | TC0500013189.hg.1 | ENST00000427584.2            | RP11-60A8.1   |        | 12<br>7.1<br>9    | 5.78<br>E-10 | 9.23<br>84   | 4.70<br>E-09 | ctrl - P10; ctrl - P11; ctrl - P2; ctrl - P3; ctrl - P8; P11 - P10; P2 - P10; P11 - P2; P11 - P3; P11 - P8; P2 - P3; P2 - P8                              |
| TC0600006967.hg.1 | TC0600006967.hg.1 | NM_001168319                 | EDN1          | 1906   | 12<br>7.1<br>8    | 5.78<br>E-10 | 9.23<br>81   | 4.70<br>E-09 | P10 - ctrl; ctrl - P11; P2 - ctrl; P3 - ctrl; P8 - ctrl; P10 - P11; P10 - P2; P10 - P3; P8 - P10; P2 - P11; P3 - P11; P8 - P11; P3 - P2; P8 - P2; P8 - P3 |
| TC0100017541.hg.1 | TC0100017541.hg.1 | NA                           | NA            | NA     | 12<br>7.1<br>E-10 | 5.80<br>E-10 | 9.23<br>65   | 4.71<br>E-09 | ctrl - P10; ctrl - P11; ctrl - P2; ctrl - P3; ctrl - P8; P11 - P10; P2 - P10; P3 - P10; P11 - P3; P11 - P8; P2 - P3; P2 - P8; P3 - P8                     |
| TC1100012545.hg.1 | TC1100012545.hg.1 | NM_012101                    | TRIM29        | 23650  | 12<br>6.4<br>E-10 | 5.99<br>E-10 | 9.22<br>25   | 4.85<br>E-09 | P10 - ctrl; P11 - ctrl; ctrl - P2; P3 - ctrl; P8 - ctrl; P10 - P2; P3 - P10; P8 - P10; P11 - P2; P3 - P11; P8 - P11; P3 - P2; P8 - P2                     |
| TC1100007273.hg.1 | TC1100007273.hg.1 | NM_000610                    | CD44          | 960    | 12<br>6.1<br>3    | 6.07<br>E-10 | 9.21<br>7    | 4.89<br>E-09 | P10 - ctrl; P3 - ctrl; P8 - ctrl; P10 - P11; P10 - P2; P3 - P10; P8 - P10; P3 - P11; P8 - P11; P3 - P2; P8 - P2; P3 - P8                                  |
| TC0500010835.hg.1 | TC0500010835.hg.1 | NM_001252226                 | PLK2          | 10769  | 12<br>5.8<br>8    | 6.14<br>E-10 | 9.21<br>19   | 4.93<br>E-09 | P10 - ctrl; ctrl - P11; P2 - ctrl; P3 - ctrl; P8 - ctrl; P10 - P11; P10 - P2; P3 - P10; P2 - P11; P3 - P11; P8 - P11; P3 - P2; P8 - P2                    |
| TC0900008955.hg.1 | TC0900008955.hg.1 | NA                           | NA            | NA     | 12<br>5.3<br>9    | 6.28<br>E-10 | 9.20<br>2    | 5.03<br>E-09 | ctrl - P10; ctrl - P11; ctrl - P3; ctrl - P8; P11 - P10; P2 - P10; P10 - P3; P10 - P8; P2 - P11; P11 - P3; P11 - P8; P2 - P3; P2 - P8                     |
| TC1700008598.hg.1 | TC1700008598.hg.1 | NM_001085423                 | MILR1         | 284021 | 12<br>5.1<br>E-10 | 6.37<br>E-10 | 9.19<br>62   | 5.08<br>E-09 | P10 - ctrl; P2 - ctrl; P3 - ctrl; P8 - ctrl; P10 - P11; P10 - P2; P10 - P3; P2 - P11; P3 - P11; P8 - P11; P3 - P2; P8 - P2; P8 - P3                       |
| TC0200015650.hg.1 | TC0200015650.hg.1 | NM_001306129                 | FN1           | 2335   | 12<br>4.0<br>6    | 6.69<br>E-10 | 9.17<br>48   | 5.32<br>E-09 | ctrl - P11; ctrl - P2; P3 - ctrl; P8 - ctrl; P10 - P11; P10 - P2; P3 - P10; P8 - P10; P3 - P11; P8 - P11; P3 - P2; P8 - P2; P3 - P8                       |
| TC1300009646.hg.1 | TC1300009646.hg.1 | NM_052867                    | NALCN         | 259232 | 12<br>3.8<br>3    | 6.76<br>E-10 | 9.17<br>02   | 5.36<br>E-09 | P10 - ctrl; ctrl - P11; ctrl - P2; P3 - ctrl; P8 - ctrl; P10 - P11; P10 - P2; P3 - P10; P8 - P10; P3 - P11; P8 - P11; P3 - P2; P8 - P2; P8 - P3           |
| TC0800007662.hg.1 | TC0800007662.hg.1 | NM_022454                    | SOX17         | 64321  | 12<br>3.4<br>E-10 | 6.90<br>E-10 | 9.16<br>14   | 5.45<br>E-09 | P10 - ctrl; P11 - ctrl; P3 - ctrl; P8 - ctrl; P10 - P11; P10 - P2; P10 - P3; P8 - P10; P11 - P2; P3 - P11; P8 - P11; P3 - P2; P8 - P2; P8 - P3            |
| TC1100008236.hg.1 | TC1100008236.hg.1 | NM_053056                    | CCND1         | 595    | 12<br>3.2<br>9    | 6.93<br>E-10 | 9.15<br>9    | 5.45<br>E-09 | P10 - ctrl; ctrl - P2; P3 - ctrl; P8 - ctrl; P10 - P11; P10 - P2; P3 - P10; P8 - P10; P11 - P2; P3 - P11; P8 - P11; P3 - P2; P8 - P2                      |
| TC0400012949.hg.1 | TC0400012949.hg.1 | NM_001135146                 | SLC39A8       | 64116  | 12<br>3.2<br>4    | 6.95<br>E-10 | 9.15<br>8    | 5.45<br>E-09 | P10 - ctrl; ctrl - P2; P3 - ctrl; P8 - ctrl; P10 - P11; P10 - P2; P10 - P3; P11 - P2; P3 - P11; P8 - P11; P3 - P2; P8 - P2; P8 - P3                       |
| TC1600006483.hg.1 | TC1600006483.hg.1 | NM_001177355                 | MSLN          | 10232  | 12<br>3.1<br>8    | 6.97<br>E-10 | 9.15<br>68   | 5.45<br>E-09 | P10 - ctrl; P11 - ctrl; P3 - ctrl; P8 - ctrl; P10 - P11; P10 - P2; P10 - P3; P11 - P2; P3 - P11; P8 - P11; P3 - P2; P8 - P2; P8 - P3                      |
| TC0200008663.hg.1 | TC0200008663.hg.1 | NM_001261419                 | IL1R2         | 7850   | 12<br>3.1<br>6    | 6.98<br>E-10 | 9.15<br>64   | 5.45<br>E-09 | P10 - ctrl; P11 - ctrl; ctrl - P2; P3 - ctrl; P8 - ctrl; P10 - P2; P3 - P10; P8 - P10; P11 - P2; P3 - P11; P8 - P11; P3 - P2; P8 - P2; P8 - P3            |
| TC1200010229.hg.1 | TC1200010229.hg.1 | NM_002820                    | PTHLH         | 5744   | 12<br>2.9<br>1    | 7.06<br>E-10 | 9.15<br>11   | 5.49<br>E-09 | P10 - ctrl; P3 - ctrl; P8 - ctrl; P10 - P11; P10 - P2; P3 - P10; P8 - P10; P11 - P2; P3 - P11; P8 - P11; P3 - P2; P8 - P2                                 |
| TC0100013028.hg.1 | TC0100013028.hg.1 | NM_004431                    | EPHA2         | 1969   | 12<br>2.8<br>5    | 7.08<br>E-10 | 9.15<br>E-09 | 5.49<br>E-09 | P10 - ctrl; ctrl - P11; ctrl - P2; P3 - ctrl; P8 - ctrl; P10 - P11; P10 - P2; P3 - P10; P8 - P10; P11 - P2; P3 - P11; P8 - P11; P3 - P2; P8 - P2          |
| TC0700013297.hg.1 | TC0700013297.hg.1 | farbley.aAug10-<br>unspliced | farbley       | NA     | 12<br>1.9<br>5    | 7.39<br>E-10 | 9.13<br>12   | 5.72<br>E-09 | ctrl - P10; ctrl - P11; P2 - ctrl; ctrl - P3; ctrl - P8; P11 - P10; P2 - P10; P3 - P10; P10 - P8; P2 - P11; P3 - P11; P11 - P8; P2 - P3; P2 - P8; P3 - P8 |
| TC0800008202.hg.1 | TC0800008202.hg.1 | ENST00000467010              | CTD-2114J12.1 | NA     | 12<br>1.5<br>E-10 | 7.55<br>E-10 | 9.12<br>19   | 5.83<br>E-09 | P10 - ctrl; ctrl - P11; P2 - ctrl; P3 - ctrl; P8 - ctrl; P10 - P11; P10 - P2; P10 - P3; P8 - P10; P2 - P11; P3 - P11; P8 - P11; P3 - P2; P8 - P2; P8 - P3 |
| TC0500012842.hg.1 | TC0500012842.hg.1 | NM_004417                    | DUSP1         | 1843   | 12<br>1.4<br>E-10 | 7.59<br>E-10 | 9.11<br>97   | 5.84<br>E-09 | P10 - ctrl; ctrl - P2; P3 - ctrl; P8 - ctrl; P10 - P11; P10 - P2; P10 - P3; P11 - P2; P3 - P11; P8 - P11; P3 - P2; P8 - P2; P8 - P3                       |
| TC0200010545.hg.1 | TC0200010545.hg.1 | NM_003872                    | NRP2          | 8828   | 12<br>1.3<br>3    | 7.62<br>E-10 | 9.11<br>82   | 5.84<br>E-09 | P10 - ctrl; P11 - ctrl; ctrl - P2; P3 - ctrl; P8 - ctrl; P10 - P2; P3 - P10; P8 - P10; P11 - P2; P3 - P11; P8 - P11; P3 - P2; P8 - P2; P3 - P8            |

|                         |                         |                               |             |          |                |              |            |              |                                                                                                                                                           |
|-------------------------|-------------------------|-------------------------------|-------------|----------|----------------|--------------|------------|--------------|-----------------------------------------------------------------------------------------------------------------------------------------------------------|
| TC1000006754.hg.1       | TC1000006754.hg.1       | NM_001025076                  | CELF2       | 10659    | 12<br>1.1<br>6 | 7.68<br>E-10 | 9.11<br>46 | 5.86<br>E-09 | P10 - ctrl; ctrl - P11; P3 - ctrl; P8 - ctrl; P10 - P11; P10 - P2; P10 - P3; P8 - P10; P2 - P11; P3 - P11; P8 - P11; P3 - P2; P8 - P2; P8 - P3            |
| TC0800007114.hg.1       | TC0800007114.hg.1       | NM_016240                     | SCARA3      | 51435    | 12<br>1.1<br>3 | 7.69<br>E-10 | 9.11<br>41 | 5.86<br>E-09 | P10 - ctrl; ctrl - P2; ctrl - P3; P8 - ctrl; P10 - P11; P10 - P2; P10 - P3; P8 - P11; P8 - P2; P8 - P3                                                    |
| TC1000007748.hg.1       | TC1000007748.hg.1       | NM_001170406                  | CDK1        | 983      | 12<br>0.6<br>5 | 7.87<br>E-10 | 9.10<br>41 | 5.98<br>E-09 | P10 - ctrl; ctrl - P11; ctrl - P2; P8 - ctrl; P10 - P11; P10 - P2; P10 - P3; P8 - P10; P11 - P2; P3 - P11; P8 - P11; P3 - P2; P8 - P2; P8 - P3            |
| TC0800012069.hg.1       | TC0800012069.hg.1       | jozuby.aAug10-<br>unspliced   | jozuby      | NA       | 12<br>0.1<br>9 | 8.05<br>E-10 | 9.09<br>43 | 6.09<br>E-09 | ctrl - P10; ctrl - P11; ctrl - P2; ctrl - P3; ctrl - P8; P11 - P10; P2 - P10; P10 - P3; P10 - P8; P2 - P11; P11 - P3; P11 - P8; P2 - P3; P2 - P8          |
| TC0400007169.hg.1       | TC0400007169.hg.1       | NM_001173523                  | PCDH7       | 5099     | 11<br>9.7<br>7 | 8.22<br>E-10 | 9.08<br>53 | 6.20<br>E-09 | P10 - ctrl; P11 - ctrl; ctrl - P2; P3 - ctrl; P8 - ctrl; P10 - P11; P10 - P2; P10 - P3; P8 - P10; P11 - P2; P3 - P11; P8 - P11; P3 - P2; P8 - P2; P8 - P3 |
| TC0100017532.hg.1       | TC0100017532.hg.1       | NA                            | NA          | NA       | 11<br>9.5<br>9 | 8.29<br>E-10 | 9.08<br>15 | 6.24<br>E-09 | ctrl - P10; P11 - ctrl; ctrl - P2; ctrl - P3; ctrl - P8; P11 - P10; P10 - P3; P11 - P2; P11 - P3; P11 - P8; P2 - P3; P2 - P8                              |
| TC0X00007190.hg.1       | TC0X00007190.hg.1       | NM_001282167                  | PORCN       | 64840    | 11<br>8.9<br>9 | 8.54<br>E-10 | 9.06<br>87 | 6.39<br>E-09 | P10 - ctrl; P11 - ctrl; ctrl - P2; P3 - ctrl; P8 - ctrl; P10 - P11; P10 - P2; P10 - P3; P8 - P10; P11 - P2; P8 - P11; P3 - P2; P8 - P2; P8 - P3           |
| TC1500007695.hg.1       | TC1500007695.hg.1       | NM_001104554                  | PAQR5       | 54852    | 11<br>8.9<br>1 | 8.57<br>E-10 | 9.06<br>71 | 6.39<br>E-09 | ctrl - P10; P11 - ctrl; ctrl - P2; ctrl - P8; P11 - P10; P2 - P10; P3 - P10; P8 - P10; P11 - P2; P11 - P3; P11 - P8; P2 - P8; P3 - P8                     |
| TSUnmapped00000003.hg.1 | TSUnmapped00000003.hg.1 | ENST00000625425               | SLC2A6      | NA       | 11<br>8.9<br>8 | 8.57<br>E-10 | 9.06<br>68 | 6.39<br>E-09 | P10 - ctrl; ctrl - P11; ctrl - P2; P3 - ctrl; P8 - ctrl; P10 - P11; P10 - P2; P8 - P10; P3 - P11; P8 - P11; P3 - P2; P8 - P2; P8 - P3                     |
| TC0500013318.hg.1       | TC0500013318.hg.1       | NR_027386_5                   | GUSBP3      |          | 11<br>8.8<br>7 | 8.59<br>E-10 | 9.06<br>63 | 6.39<br>E-09 | ctrl - P10; ctrl - P11; P2 - ctrl; ctrl - P3; ctrl - P8; P11 - P10; P2 - P10; P3 - P10; P10 - P8; P2 - P11; P11 - P3; P11 - P8; P2 - P3; P2 - P8; P3 - P8 |
| TC0200015623.hg.1       | TC0200015623.hg.1       | gleygobu.aAug10-<br>unspliced | gleygobu    | NA       | 11<br>8.6<br>1 | 8.70<br>E-10 | 9.06<br>06 | 6.45<br>E-09 | ctrl - P10; P2 - ctrl; ctrl - P3; ctrl - P8; P11 - P10; P2 - P10; P10 - P3; P10 - P8; P2 - P11; P11 - P3; P11 - P8; P2 - P3; P2 - P8; P3 - P8             |
| TC0500009424.hg.1       | TC0500009424.hg.1       | NM_003862                     | FGF18       | 8817     | 11<br>8.5<br>2 | 8.74<br>E-10 | 9.05<br>86 | 6.46<br>E-09 | P10 - ctrl; P11 - ctrl; ctrl - P2; P3 - ctrl; P8 - ctrl; P10 - P11; P10 - P2; P3 - P10; P8 - P10; P11 - P2; P3 - P11; P8 - P11; P3 - P2; P8 - P2          |
| TC0300013075.hg.1       | TC0300013075.hg.1       | ENST00000469794.1             | RP11-3K16.2 |          | 11<br>8.4<br>6 | 8.76<br>E-10 | 9.05<br>74 | 6.46<br>E-09 | ctrl - P10; ctrl - P11; P2 - ctrl; ctrl - P3; ctrl - P8; P11 - P10; P2 - P10; P10 - P8; P2 - P11; P11 - P3; P11 - P8; P3 - P2; P8; P3 - P8                |
| TC1600007931.hg.1       | TC1600007931.hg.1       | NM_017839                     | LPCAT2      | 54947    | 11<br>8.3<br>4 | 8.81<br>E-10 | 9.05<br>49 | 6.47<br>E-09 | ctrl - P10; ctrl - P11; ctrl - P2; ctrl - P3; ctrl - P8; P11 - P10; P2 - P10; P3 - P10; P8 - P10; P2 - P11; P3 - P11; P8 - P11; P3 - P2; P8; P3 - P8      |
| TC0700007067.hg.1       | TC0700007067.hg.1       | NM_152793                     | MTURN       | 222166   | 11<br>8.3<br>8 | 8.83<br>E-10 | 9.05<br>4  | 6.47<br>E-09 | ctrl - P10; ctrl - P2; ctrl - P3; ctrl - P8; P11 - P10; P2 - P10; P11 - P2; P11 - P3; P11 - P8; P2 - P3; P2 - P8                                          |
| TC2200007312.hg.1       | TC2200007312.hg.1       | NM_002305                     | LGALS1      | 3956     | 11<br>8.0<br>8 | 8.93<br>E-10 | 9.04<br>91 | 6.53<br>E-09 | P10 - ctrl; ctrl - P11; P3 - ctrl; P8 - ctrl; P10 - P11; P10 - P2; P3 - P10; P8 - P10; P2 - P11; P3 - P11; P8 - P11; P3 - P2; P8; P2 - P3                 |
| TC1300008945.hg.1       | TC1300008945.hg.1       | gachy.aAug10-<br>unspliced    | gachy       | NA       | 11<br>7.8<br>7 | 9.05<br>E-10 | 9.04<br>32 | 6.60<br>E-09 | ctrl - P10; ctrl - P11; P2 - ctrl; ctrl - P3; ctrl - P8; P11 - P10; P2 - P10; P3 - P10; P10 - P8; P2 - P11; P11 - P8; P2 - P3; P2 - P8; P3 - P8           |
| TC0900007811.hg.1       | TC0900007811.hg.1       | steylaw.aAug10-<br>unspliced  | steylaw     | NA       | 11<br>7.4<br>4 | 9.22<br>E-10 | 9.03<br>53 | 6.70<br>E-09 | ctrl - P10; ctrl - P11; P2 - ctrl; ctrl - P3; ctrl - P8; P2 - P10; P3 - P10; P10 - P8; P2 - P11; P3 - P11; P11 - P8; P2 - P3; P2 - P8; P3 - P8            |
| TC1300009736.hg.1       | TC1300009736.hg.1       | NR_046848                     | FAM155A-IT1 | 1.01E+08 | 11<br>7.2<br>8 | 9.29<br>E-10 | 9.03<br>18 | 6.73<br>E-09 | ctrl - P10; ctrl - P11; P2 - ctrl; ctrl - P8; P11 - P10; P2 - P10; P3 - P10; P10 - P8; P2 - P11; P3 - P11; P11 - P8; P2 - P3; P2 - P8; P3 - P8            |
| TC0900008930.hg.1       | TC0900008930.hg.1       | NM_016307                     | PRRX2       | 51450    | 11<br>7.0<br>6 | 9.40<br>E-10 | 9.02<br>71 | 6.79<br>E-09 | P10 - ctrl; P11 - ctrl; P2 - ctrl; P3 - ctrl; P8 - ctrl; P10 - P11; P10 - P2; P10 - P3; P11 - P2; P3 - P11; P8 - P11; P3 - P2; P8 - P2; P8 - P3           |
| TC1500007664.hg.1       | TC1500007664.hg.1       | slerzo.aAug10-<br>unspliced   | slerzo      | NA       | 11<br>6.7<br>5 | 9.54<br>E-10 | 9.02<br>05 | 6.87<br>E-09 | ctrl - P10; ctrl - P11; P2 - ctrl; ctrl - P8; P11 - P10; P2 - P10; P3 - P10; P3 - P10; P10 - P8; P2 - P11; P3 - P11; P2 - P3; P2 - P8; P3 - P8            |
| TC0400011920.hg.1       | TC0400011920.hg.1       | NM_014331                     | SLC7A11     | 23657    | 11<br>6.1<br>5 | 9.83<br>E-10 | 9.00<br>72 | 7.06<br>E-09 | P10 - ctrl; P11 - ctrl; P2 - ctrl; P3 - ctrl; P8 - ctrl; P10 - P11; P10 - P2; P11 - P2; P3 - P11; P8 - P11; P3 - P2; P8 - P2                              |
| TC0200014617.hg.1       | TC0200014617.hg.1       | NM_001164507                  | NEB         | 4703     | 11<br>5.9<br>8 | 9.92<br>E-10 | 9.00<br>36 | 7.10<br>E-09 | ctrl - P10; ctrl - P3; ctrl - P8; P11 - P10; P2 - P10; P3 - P10; P2 - P11; P11 - P3; P11 - P8; P2 - P3; P2 - P8; P3 - P8                                  |
| TC1200011067.hg.1       | TC1200011067.hg.1       | NM_173812                     | DPY19L2     | 283417   | 11<br>5.4<br>8 | 1.02<br>E-09 | 8.99<br>26 | 7.26<br>E-09 | ctrl - P10; ctrl - P11; ctrl - P3; ctrl - P8; P11 - P10; P2 - P10; P3 - P10; P8 - P10; P2 - P11; P11 - P8; P2 - P3; P2 - P8; P3 - P8                      |
| TC0600012745.hg.1       | TC0600012745.hg.1       | tugleyby.aAug10-<br>unspliced | tugleyby    | NA       | 11<br>5.3<br>1 | 1.03<br>E-09 | 8.98<br>88 | 7.31<br>E-09 | ctrl - P10; ctrl - P11; P2 - ctrl; ctrl - P3; ctrl - P8; P2 - P10; P3 - P10; P10 - P8; P2 - P11; P11 - P8; P2 - P3; P2 - P8; P3 - P8                      |
| TC1000012117.hg.1       | TC1000012117.hg.1       | NM_001270764                  | CHST15      | 51363    | 11<br>5.0<br>6 | 1.04<br>E-09 | 8.98<br>33 | 7.38<br>E-09 | P10 - ctrl; ctrl - P11; P3 - ctrl; P8 - ctrl; P10 - P11; P10 - P2; P10 - P3; P2 - P11; P3 - P11; P8 - P11; P3 - P2; P8 - P2; P8 - P3                      |
| TC0800012147.hg.1       | TC0800012147.hg.1       | NM_003313                     | TSTA3       | 7264     | 11<br>4.8<br>8 | 1.05<br>E-09 | 8.97<br>94 | 7.42<br>E-09 | P10 - ctrl; P2 - ctrl; P3 - ctrl; P8 - ctrl; P10 - P11; P10 - P2; P3 - P10; P8 - P10; P2 - P11; P3 - P11; P8 - P11; P3 - P2; P8 - P2                      |
| TSUnmapped00000051.hg.1 | TSUnmapped00000051.hg.1 | ENST00000625489               | SLC2A6      | NA       | 11<br>4.4<br>8 | 1.07<br>E-09 | 8.96<br>87 | 7.59<br>E-09 | P10 - ctrl; ctrl - P11; ctrl - P2; P3 - ctrl; P8 - ctrl; P10 - P11; P10 - P2; P10 - P3; P8 - P10; P3 - P11; P8 - P11; P3 - P2; P8 - P2; P8 - P3           |
| TC1100006732.hg.1       | TC1100006732.hg.1       | sugyby.aAug10                 | sugyby      | NA       | 11<br>4.2<br>6 | 1.08<br>E-09 | 8.96<br>57 | 7.60<br>E-09 | P10 - ctrl; P11 - ctrl; ctrl - P2; P3 - ctrl; P8 - ctrl; P10 - P2; P10 - P3; P10 - P8; P11 - P2; P11 - P3; P11 - P8; P3 - P2; P8 - P2; P8 - P3            |
| TC0500013317.hg.1       | TC0500013317.hg.1       | NR_024054                     | SMA4        | 11039    | 11<br>4.2<br>4 | 1.08<br>E-09 | 8.96<br>51 | 7.60<br>E-09 | ctrl - P10; ctrl - P11; P2 - ctrl; ctrl - P3; ctrl - P8; P11 - P10; P2 - P10; P3 - P10; P2 - P11; P11 - P8; P2 - P3; P2 - P8; P3 - P8                     |
| TC1200008224.hg.1       | TC1200008224.hg.1       | NM_006851                     | GLIPR1      | 11010    | 11<br>4.2<br>1 | 1.09<br>E-09 | 8.96<br>45 | 7.60<br>E-09 | P10 - ctrl; ctrl - P2; P3 - ctrl; P8 - ctrl; P10 - P11; P10 - P2; P3 - P10; P8 - P10; P3 - P11; P8 - P11; P3 - P2; P8 - P2; P8 - P3                       |
| TC1300006543.hg.1       | TC1300006543.hg.1       | NM_002010                     | FGF9        | 2254     | 11<br>4.1<br>4 | 1.09<br>E-09 | 8.96<br>29 | 7.60<br>E-09 | ctrl - P10; ctrl - P3; ctrl - P8; P11 - P10; P2 - P10; P2 - P11; P11 - P3; P11 - P8; P2 - P3; P2 - P8; P3 - P8                                            |
| TC0200016019.hg.1       | TC0200016019.hg.1       | NR_002921                     | SNORA75     | 2q37.1   | 11<br>3.8<br>9 | 1.10<br>E-09 | 8.95<br>75 | 7.68<br>E-09 | ctrl - P10; P11 - ctrl; P2 - ctrl; ctrl - P8; P11 - P10; P2 - P10; P3 - P10; P2 - P11; P11 - P3; P11 - P8; P2 - P3; P2 - P8; P3 - P8                      |

|                                     |                                     |                              |              |        |                                                       |                                                                                                                                                           |
|-------------------------------------|-------------------------------------|------------------------------|--------------|--------|-------------------------------------------------------|-----------------------------------------------------------------------------------------------------------------------------------------------------------|
| TC0800011595.hg.1                   | TC0800011595.hg.1                   | hsa_circ_0002817             | EXT1         |        | 11<br>3.3<br>1.14<br>8.94<br>7.88<br>3 E-09 49 E-09   | ctrl - P10; ctrl - P11; P2 - ctrl; ctrl - P3; ctrl - P8; P10 - P11; P2 - P10; P3 - P10; P10 - P8; P2 - P11; P3 - P11; P11 - P8; P2 - P3; P2 - P8; P3 - P8 |
| TC1100011844.hg.1                   | TC1100011844.hg.1                   | fomorby.aAug10-<br>unspliced | fomorby      | NA     | 11<br>3.1<br>1.14<br>8.94<br>7.91<br>9 E-09 17 E-09   | ctrl - P10; ctrl - P11; P2 - ctrl; ctrl - P3; ctrl - P8; P11 - P10; P2 - P10; P3 - P10; P10 - P8; P2 - P11; P11 - P8; P2 - P3; P2 - P8; P3 - P8           |
| TC0500013319.hg.1                   | TC0500013319.hg.1                   | NR_033968                    | GUSBP9       | 1E+08  | 11<br>3.1<br>1.15<br>8.94<br>7.91<br>5 E-09 09 E-09   | ctrl - P10; ctrl - P11; P2 - ctrl; ctrl - P3; ctrl - P8; P11 - P10; P2 - P10; P3 - P10; P10 - P8; P2 - P11; P11 - P8; P2 - P3; P2 - P8; P3 - P8           |
| TC1600008712.hg.1                   | TC1600008712.hg.1                   | NM_002163                    | IRF8         | 3394   | 11<br>2.8<br>1.17<br>8.93<br>8.00<br>1 E-09 31 E-09   | P10 - ctrl; P3 - ctrl; P8 - ctrl; P10 - P11; P10 - P2; P10 - P3; P3 - P11; P8 - P11; P8 - P2; P8 - P3                                                     |
| TC1300009737.hg.1                   | TC1300009737.hg.1                   | roynoy.aAug10-<br>unspliced  | roynoy       | NA     | 11<br>2.7<br>1.17<br>8.93<br>8.00<br>9 E-09 27 E-09   | ctrl - P10; ctrl - P11; P2 - ctrl; ctrl - P3; ctrl - P8; P2 - P10; P3 - P10; P10 - P8; P2 - P11; P3 - P11; P11 - P8; P2 - P3; P2 - P8; P3 - P8            |
| TC1300008096.hg.1                   | TC1300008096.hg.1                   | NA                           | NA           | NA     | 11<br>2.7<br>1.17<br>8.93<br>8.00<br>7 E-09 23 E-09   | ctrl - P10; ctrl - P11; ctrl - P3; ctrl - P8; P2 - P10; P10 - P3; P10 - P8; P2 - P11; P11 - P3; P11 - P8; P2 - P3; P2 - P8; P3 - P8                       |
| TC2000006688.hg.1                   | TC2000006688.hg.1                   | NM_003081                    | SNAP25       | 6616   | 11<br>2.4<br>1.19<br>8.92<br>8.10<br>9 E-09 6 E-09    | P10 - ctrl; P11 - ctrl; P3 - ctrl; P8 - ctrl; P10 - P11; P10 - P2; P10 - P3; P11 - P2; P3 - P11; P8 - P11; P3 - P2; P8 - P2; P8 - P3                      |
| TC0200009762.hg.1                   | TC0200009762.hg.1                   | PKP4.vkAug10-<br>unspliced   | PKP4         | NA     | 11<br>1.9<br>1.22<br>8.91<br>8.27<br>8 E-09 44 E-09   | ctrl - P10; P2 - ctrl; ctrl - P3; ctrl - P8; P11 - P10; P2 - P10; P3 - P10; P10 - P8; P2 - P11; P11 - P3; P11 - P8; P2 - P3; P2 - P8; P3 - P8             |
| TC0600012743.hg.1                   | TC0600012743.hg.1                   | NR_033557                    | LOC100422737 | 1E+08  | 11<br>1.9<br>1.22<br>8.91<br>8.27<br>7 E-09 42 E-09   | ctrl - P10; ctrl - P11; ctrl - P2; ctrl - P3; ctrl - P8; P11 - P10; P2 - P10; P10 - P8; P2 - P11; P11 - P3; P11 - P8; P2 - P3; P2 - P8; P3 - P8           |
| TC1000010845.hg.1                   | TC1000010845.hg.1                   | jajor.aAug10-<br>unspliced   | jajor        | NA     | 11<br>1.8<br>1.23<br>8.91<br>8.27<br>1 E-09 05 E-09   | ctrl - P10; ctrl - P11; P2 - ctrl; ctrl - P3; ctrl - P8; P2 - P10; P10 - P8; P2 - P11; P11 - P8; P2 - P3; P2 - P8; P3 - P8                                |
| TC1100013087.hg.1                   | TC1100013087.hg.1                   | NM_001165                    | BIRC3        | 330    | 11<br>1.7<br>1.23<br>8.90<br>8.27<br>3 E-09 89 E-09   | P10 - ctrl; P11 - ctrl; P3 - ctrl; P8 - ctrl; P10 - P11; P10 - P2; P8 - P10; P3 - P11; P8 - P11; P3 - P2; P8 - P2; P8 - P3                                |
| TC2100006465.hg.1                   | TC2100006465.hg.1                   | uc032psp.2                   | FP671120.2   | NA     | 11<br>1.6<br>1.24<br>8.90<br>8.27<br>5 E-09 7 E-09    | ctrl - P10; ctrl - P11; P2 - ctrl; ctrl - P3; ctrl - P8; P2 - P10; P10 - P8; P2 - P11; P2 - P3; P2 - P8; P3 - P8                                          |
| TC2100006481.hg.1                   | TC2100006481.hg.1                   | uc032ptl.2                   | FP236383.8   | NA     | 11<br>1.6<br>1.24<br>8.90<br>8.27<br>5 E-09 7 E-09    | ctrl - P10; ctrl - P11; P2 - ctrl; ctrl - P3; ctrl - P8; P2 - P10; P10 - P8; P2 - P11; P2 - P3; P2 - P8; P3 - P8                                          |
| TC22_K1270733v1_random00006438.hg.1 | TC22_K1270733v1_random00006438.hg.1 | uc032qtv.2                   | AL353644.9   | NA     | 11<br>1.6<br>1.24<br>8.90<br>8.27<br>5 E-09 7 E-09    | ctrl - P10; ctrl - P11; P2 - ctrl; ctrl - P3; ctrl - P8; P2 - P10; P10 - P8; P2 - P11; P2 - P3; P2 - P8; P3 - P8                                          |
| TCUn_GL000220v1_00006438.hg.1       | TCUn_GL000220v1_00006438.hg.1       | uc022brg.2                   | AL592188.2   | NA     | 11<br>1.6<br>1.24<br>8.90<br>8.27<br>5 E-09 7 E-09    | ctrl - P10; ctrl - P11; P2 - ctrl; ctrl - P3; ctrl - P8; P2 - P10; P10 - P8; P2 - P11; P2 - P3; P2 - P8; P3 - P8                                          |
| TC0200009707.hg.1                   | TC0200009707.hg.1                   | NM_001260508                 | KCNJ3        | 3760   | 11<br>1.6<br>1.24<br>8.90<br>8.27<br>3 E-09 65 E-09   | ctrl - P10; P11 - ctrl; P2 - ctrl; ctrl - P3; ctrl - P8; P11 - P10; P2 - P10; P11 - P2; P11 - P3; P11 - P8; P2 - P3; P2 - P8                              |
| TC0300009777.hg.1                   | TC0300009777.hg.1                   | NM_000893                    | KNG1         | 3827   | 11<br>0.9<br>1.28<br>8.89<br>8.53<br>7 E-09 14 E-09   | ctrl - P10; ctrl - P11; ctrl - P2; ctrl - P3; ctrl - P8; P11 - P10; P10 - P2; P10 - P3; P10 - P8; P11 - P2; P11 - P3; P11 - P8; P8 - P2; P8 - P3          |
| TC0300008196.hg.1                   | TC0300008196.hg.1                   | NM_175056                    | ZPLD1        | 131368 | 11<br>0.6<br>1.31<br>8.88<br>8.65<br>4 E-09 38 E-09   | P10 - ctrl; P2 - ctrl; P3 - ctrl; P8 - ctrl; P10 - P11; P10 - P2; P10 - P3; P2 - P11; P3 - P11; P8 - P11; P3 - P2; P8 - P2                                |
| HTA2-pos-2985914_st                 | 23150250                            | NA                           | NA           | NA     | 11<br>0.6<br>1.31<br>8.88<br>8.65<br>2 E-09 34 E-09   | ctrl - P10; ctrl - P11; ctrl - P3; ctrl - P8; P11 - P10; P2 - P10; P3 - P10; P2 - P11; P11 - P8; P2 - P3; P2 - P8; P3 - P8                                |
| TC1200009547.hg.1                   | TC1200009547.hg.1                   | NM_001190997                 | SLC6A13      | 6540   | 11<br>0.4<br>1.32<br>8.88<br>8.67<br>9 E-09 03 E-09   | ctrl - P10; P11 - ctrl; ctrl - P2; ctrl - P3; ctrl - P8; P11 - P10; P3 - P10; P10 - P8; P11 - P2; P11 - P3; P11 - P8; P2 - P8; P3 - P8                    |
| TC1400009175.hg.1                   | TC1400009175.hg.1                   | NM_007361                    | NID2         | 22795  | 11<br>0.4<br>1.32<br>8.87<br>8.67<br>5 E-09 95 E-09   | P10 - ctrl; P2 - ctrl; P3 - ctrl; P8 - ctrl; P10 - P11; P10 - P2; P10 - P3; P2 - P11; P3 - P11; P8 - P11; P3 - P2; P8 - P2; P8 - P3                       |
| TC0400011284.hg.1                   | TC0400011284.hg.1                   | NA                           | NA           | NA     | 11<br>0.4<br>1.32<br>8.87<br>8.67<br>3 E-09 9 E-09    | ctrl - P10; ctrl - P11; ctrl - P3; ctrl - P8; P11 - P10; P2 - P10; P3 - P10; P10 - P8; P2 - P11; P11 - P3; P11 - P8; P2 - P3; P2 - P8; P3 - P8            |
| TC0100018482.hg.1                   | TC0100018482.hg.1                   | NM_001040874                 | HIST2H2AA4   | 723790 | 11<br>1.1<br>1.34<br>8.87<br>8.80<br>0.1 E-09 13 E-09 | P10 - ctrl; P11 - ctrl; ctrl - P2; ctrl - P3; ctrl - P8; P10 - P11; P10 - P2; P10 - P3; P11 - P2; P8 - P11; P3 - P2; P8 - P2; P8 - P3                     |
| TC1500009709.hg.1                   | TC1500009709.hg.1                   | NM_001218                    | CA12         | 771    | 10<br>9.9<br>1.35<br>8.86<br>8.83<br>7 E-09 85 E-09   | P10 - ctrl; P11 - ctrl; P3 - ctrl; P8 - ctrl; P10 - P11; P10 - P2; P3 - P11; P8 - P11; P3 - P2; P8 - P2; P8 - P3                                          |
| TC1000008767.hg.1                   | TC1000008767.hg.1                   | NM_032727                    | INA          | 9118   | 10<br>9.8<br>1.36<br>8.86<br>8.85<br>8 E-09 64 E-09   | P10 - ctrl; ctrl - P11; P2 - ctrl; P3 - ctrl; P8 - ctrl; P10 - P11; P10 - P2; P8 - P10; P2 - P11; P3 - P11; P8 - P11; P3 - P2; P8 - P2; P8 - P3           |
| TC0200015093.hg.1                   | TC0200015093.hg.1                   | NM_001113397                 | ZNF385B      | 151126 | 10<br>9.8<br>1.36<br>8.86<br>8.86<br>2 E-09 5 E-09    | ctrl - P10; P11 - ctrl; ctrl - P2; ctrl - P8; P11 - P10; P3 - P10; P8 - P10; P11 - P2; P11 - P3; P11 - P8; P3 - P2; P3 - P8                               |
| TC1000007954.hg.1                   | TC1000007954.hg.1                   | NM_001174098                 | SLC29A3      | 55315  | 10<br>9.7<br>1.37<br>8.86<br>8.86<br>8 E-09 4 E-09    | ctrl - P10; P11 - ctrl; ctrl - P2; ctrl - P3; ctrl - P8; P11 - P10; P10 - P2; P10 - P3; P11 - P2; P11 - P3; P11 - P8; P3 - P2; P8 - P2; P8 - P3           |
| TC1800008892.hg.1                   | TC1800008892.hg.1                   | snysky.aAug10-<br>unspliced  | snysky       | NA     | 10<br>9.7<br>1.37<br>8.86<br>8.87<br>1 E-09 23 E-09   | ctrl - P10; ctrl - P11; P2 - ctrl; ctrl - P3; ctrl - P8; P11 - P10; P2 - P10; P3 - P10; P2 - P11; P11 - P8; P2 - P3; P2 - P8; P3 - P8                     |
| TC0200008666.hg.1                   | TC0200008666.hg.1                   | NM_000877                    | IL1R1        | 3554   | 10<br>9.4<br>1.39<br>8.85<br>8.97<br>4 E-09 62 E-09   | P10 - ctrl; P11 - ctrl; P3 - ctrl; P8 - ctrl; P10 - P11; P10 - P2; P10 - P3; P11 - P2; P8 - P11; P3 - P2; P8 - P2; P8 - P3                                |
| TC0100018210.hg.1                   | TC0100018210.hg.1                   | NM_001162530                 | SH3D21       | 79729  | 10<br>9.2<br>1.41<br>8.85<br>9.05<br>2 E-09 11 E-09   | ctrl - P10; ctrl - P11; ctrl - P2; ctrl - P3; ctrl - P8; P11 - P10; P2 - P10; P3 - P10; P8 - P10; P11 - P2; P11 - P3; P11 - P8; P3 - P2; P3 - P8          |
| TC1900010856.hg.1                   | TC1900010856.hg.1                   | NM_001005376                 | PLAUR        | 5329   | 10<br>8.8<br>1.44<br>8.84<br>9.20<br>7 E-09 29 E-09   | P10 - ctrl; ctrl - P2; P3 - ctrl; P8 - ctrl; P10 - P11; P10 - P2; P8 - P10; P11 - P2; P3 - P11; P8 - P11; P3 - P2; P8 - P2; P8 - P3                       |
| TC0500011066.hg.1                   | TC0500011066.hg.1                   | NA                           | NA           | NA     | 10<br>8.6<br>1.45<br>8.83<br>9.29<br>5 E-09 78 E-09   | ctrl - P10; ctrl - P11; P2 - ctrl; ctrl - P3; ctrl - P8; P11 - P10; P2 - P10; P3 - P10; P10 - P8; P2 - P11; P11 - P8; P2 - P3; P2 - P8; P3 - P8           |
| TC1800008083.hg.1                   | TC1800008083.hg.1                   | NA                           | NA           | NA     | 10<br>8.3<br>1.48<br>8.83<br>9.42<br>4 E-09 06 E-09   | ctrl - P10; ctrl - P11; P2 - ctrl; ctrl - P3; ctrl - P8; P11 - P10; P2 - P10; P3 - P10; P10 - P8; P2 - P11; P11 - P8; P2 - P3; P2 - P8; P3 - P8           |

|                   |                   |                                 |             |          |                |              |            |              |                                                                                                                                                 |
|-------------------|-------------------|---------------------------------|-------------|----------|----------------|--------------|------------|--------------|-------------------------------------------------------------------------------------------------------------------------------------------------|
| TC1000010843.hg.1 | TC1000010843.hg.1 | NM_001033083                    | PBLD        | 64081    | 10<br>8.2<br>3 | 1.49<br>E-09 | 8.82<br>8  | 9.42<br>E-09 | ctrl - P10; P11 - ctrl; ctrl - P2; ctrl - P3; ctrl - P8; P11 - P10; P10 - P3; P11 - P2; P11 - P3; P11 - P8; P2 - P3; P8 - P3                    |
| TC0300010930.hg.1 | TC0300010930.hg.1 | NM_020208                       | SLC6A20     | 54716    | 10<br>8.2<br>3 | 1.49<br>E-09 | 8.82<br>73 | 9.42<br>E-09 | P10 - ctrl; P11 - ctrl; P2 - ctrl; P3 - ctrl; P8 - ctrl; P10 - P11; P10 - P2; P10 - P3; P8 - P11; P8 - P2; P8 - P3                              |
| TC0300010350.hg.1 | TC0300010350.hg.1 | NM_004625                       | WNT7A       | 7476     | 10<br>8.1<br>9 | 1.49<br>E-09 | 8.82<br>69 | 9.42<br>E-09 | P10 - ctrl; ctrl - P11; ctrl - P2; P3 - ctrl; P8 - ctrl; P10 - P11; P10 - P2; P3 - P11; P8 - P11; P3 - P2; P8 - P2; P8 - P3                     |
| TC0X00010954.hg.1 | TC0X00010954.hg.1 | NM_001139498                    | FGF13       | 2258     | 10<br>7.9<br>4 | 1.51<br>E-09 | 8.82<br>12 | 9.53<br>E-09 | ctrl - P10; ctrl - P2; ctrl - P3; ctrl - P8; P11 - P10; P2 - P10; P3 - P10; P11 - P2; P11 - P3; P11 - P8; P2 - P3; P2 - P8; P3 - P8             |
| TC1000008236.hg.1 | TC1000008236.hg.1 | NM_001128309                    | TSPAN14     | 81619    | 10<br>7.7<br>7 | 1.52<br>E-09 | 8.81<br>72 | 9.59<br>E-09 | P10 - ctrl; ctrl - P11; ctrl - P2; P8 - ctrl; P10 - P11; P10 - P2; P10 - P3; P11 - P2; P3 - P11; P8 - P11; P3 - P2; P8 - P2; P8 - P3            |
| TC0300013072.hg.1 | TC0300013072.hg.1 | shorjeebu.aAug10-<br>unspliced  | shorjeebu   | NA       | 10<br>7.7<br>2 | 1.53<br>E-09 | 8.81<br>56 | 9.60<br>E-09 | ctrl - P10; ctrl - P11; P2 - ctrl; ctrl - P3; ctrl - P8; P11 - P10; P2 - P10; P10 - P8; P2 - P11; P11 - P3; P11 - P8; P2 - P3; P2 - P8; P3 - P8 |
| TC0100017113.hg.1 | TC0100017113.hg.1 | NM_002644                       | PIGR        | 5284     | 10<br>7.4<br>4 | 1.55<br>E-09 | 8.80<br>95 | 9.71<br>E-09 | P10 - ctrl; P8 - ctrl; P10 - P11; P10 - P2; P10 - P3; P8 - P10; P8 - P11; P8 - P2; P8 - P3                                                      |
| TC0700011626.hg.1 | TC0700011626.hg.1 | NM_006379                       | SEMA3C      | 10512    | 10<br>5.8<br>7 | 1.69<br>E-09 | 8.77<br>09 | 1.06<br>E-08 | ctrl - P2; P3 - ctrl; P8 - ctrl; P10 - P11; P10 - P2; P3 - P10; P8 - P10; P11 - P2; P3 - P11; P8 - P11; P3 - P2; P8 - P2; P3 - P8               |
| TC0600011499.hg.1 | TC0600011499.hg.1 | NM_001243961                    | HLA-DQ81    | 3119     | 10<br>5.7<br>3 | 1.70<br>E-09 | 8.76<br>86 | 1.06<br>E-08 | P10 - ctrl; ctrl - P2; P8 - ctrl; P10 - P11; P10 - P2; P10 - P3; P11 - P2; P8 - P11; P3 - P2; P8 - P2; P8 - P3                                  |
| TC0400009129.hg.1 | TC0400009129.hg.1 | NM_001253727                    | RXFP1       | 4q32.1   | 10<br>5.6<br>8 | 1.71<br>E-09 | 8.76<br>76 | 1.06<br>E-08 | P10 - ctrl; P2 - ctrl; P3 - ctrl; P8 - ctrl; P10 - P11; P10 - P2; P10 - P3; P2 - P11; P3 - P11; P8 - P11; P3 - P2; P8 - P2; P8 - P3             |
| TC0300007061.hg.1 | TC0300007061.hg.1 | ployswerby.aAug10-<br>unspliced | ployswerby  | NA       | 10<br>5.6<br>7 | 1.71<br>E-09 | 8.76<br>72 | 1.06<br>E-08 | ctrl - P10; ctrl - P11; ctrl - P3; ctrl - P8; P11 - P10; P2 - P10; P3 - P10; P10 - P8; P2 - P11; P11 - P3; P11 - P8; P2 - P3; P2 - P8; P3 - P8  |
| TC1000009851.hg.1 | TC1000009851.hg.1 | NM_018027                       | FRMD4A      | 55691    | 10<br>5.4<br>8 | 1.73<br>E-09 | 8.76<br>28 | 1.07<br>E-08 | ctrl - P10; P11 - ctrl; ctrl - P2; ctrl - P3; ctrl - P8; P11 - P10; P10 - P3; P10 - P8; P11 - P2; P11 - P3; P11 - P8; P2 - P3; P2 - P8          |
| TC0X00007537.hg.1 | TC0X00007537.hg.1 | NM_012310                       | KIF4A       | 24137    | 10<br>5.3<br>5 | 1.74<br>E-09 | 8.75<br>95 | 1.07<br>E-08 | P10 - ctrl; ctrl - P11; ctrl - P2; ctrl - P3; P8 - ctrl; P10 - P11; P10 - P2; P10 - P3; P8 - P10; P8 - P11; P3 - P2; P8 - P2; P8 - P3           |
| TC0300007189.hg.1 | TC0300007189.hg.1 | NM_001100594                    | SNRK        | 54861    | 10<br>5.2<br>8 | 1.75<br>E-09 | 8.75<br>79 | 1.07<br>E-08 | ctrl - P10; P11 - ctrl; ctrl - P2; ctrl - P3; ctrl - P8; P11 - P10; P11 - P2; P11 - P3; P11 - P8; P2 - P3; P2 - P8                              |
| TC0300009852.hg.1 | TC0300009852.hg.1 | NA                              | NA          | NA       | 10<br>4.6<br>8 | 1.81<br>E-09 | 8.74<br>34 | 1.11<br>E-08 | P10 - ctrl; P3 - ctrl; P8 - ctrl; P10 - P11; P10 - P2; P10 - P3; P3 - P11; P8 - P11; P11 - P2; P8 - P2; P8 - P3                                 |
| TC0500011352.hg.1 | TC0500011352.hg.1 | NM_001278642                    | EDIL3       | 10085    | 10<br>3.6<br>3 | 1.91<br>E-09 | 8.71<br>79 | 1.17<br>E-08 | ctrl - P10; P2 - ctrl; ctrl - P8; P11 - P10; P2 - P10; P3 - P10; P10 - P8; P2 - P11; P11 - P8; P2 - P3; P2 - P8; P3 - P8                        |
| TC0800011416.hg.1 | TC0800011416.hg.1 | rawwybu.aAug10-<br>unspliced    | rawwybu     | NA       | 10<br>3.2<br>9 | 1.95<br>E-09 | 8.70<br>94 | 1.19<br>E-08 | ctrl - P10; ctrl - P11; P2 - ctrl; ctrl - P3; ctrl - P8; P11 - P10; P2 - P10; P10 - P8; P2 - P11; P11 - P8; P2 - P3; P2 - P8; P3 - P8           |
| TC2000007297.hg.1 | TC2000007297.hg.1 | NM_080607                       | VSTM2L      | 128434   | 10<br>3.2<br>6 | 1.96<br>E-09 | 8.70<br>88 | 1.19<br>E-08 | P10 - ctrl; P11 - ctrl; P3 - ctrl; P8 - ctrl; P10 - P11; P10 - P2; P3 - P10; P8 - P10; P11 - P2; P3 - P11; P8 - P11; P3 - P2; P8 - P2; P8 - P3  |
| TC1000012516.hg.1 | TC1000012516.hg.1 | NM_001135241                    | AKR1C2      | 1646     | 10<br>2.9<br>4 | 1.99<br>E-09 | 8.70<br>09 | 1.21<br>E-08 | P10 - ctrl; P11 - ctrl; ctrl - P2; P3 - ctrl; P8 - ctrl; P10 - P11; P10 - P2; P10 - P3; P11 - P2; P3 - P11; P8 - P11; P3 - P2; P8 - P2; P8 - P3 |
| TC1200009621.hg.1 | TC1200009621.hg.1 | NM_001243088                    | FOXN1       | 2305     | 10<br>2.7<br>2 | 2.02<br>E-09 | 8.69<br>55 | 1.22<br>E-08 | P10 - ctrl; ctrl - P11; ctrl - P2; P3 - ctrl; P8 - ctrl; P10 - P11; P10 - P2; P10 - P3; P8 - P10; P3 - P11; P8 - P11; P3 - P2; P8 - P2; P8 - P3 |
| TC0200014361.hg.1 | TC0200014361.hg.1 | NM_001077427                    | LYPD1       | 2q21.2   | 10<br>2.6<br>2 | 2.03<br>E-09 | 8.69<br>3  | 1.22<br>E-08 | P10 - ctrl; P11 - ctrl; P3 - ctrl; P8 - ctrl; P10 - P11; P10 - P2; P10 - P3; P10 - P8; P11 - P2; P3 - P11; P8 - P11; P3 - P2; P8 - P2           |
| TC0700012226.hg.1 | TC0700012226.hg.1 | NA                              | NA          | NA       | 10<br>2.6<br>1 | 2.03<br>E-09 | 8.69<br>28 | 1.22<br>E-08 | ctrl - P10; ctrl - P11; P2 - ctrl; ctrl - P3; ctrl - P8; P11 - P10; P2 - P10; P3 - P10; P2 - P11; P11 - P8; P2 - P3; P2 - P8; P3 - P8           |
| TC0800008378.hg.1 | TC0800008378.hg.1 | ENST00000519566.1               | KB-1991G8.1 |          | 10<br>2.5<br>5 | 2.04<br>E-09 | 8.69<br>14 | 1.23<br>E-08 | P10 - ctrl; P2 - ctrl; P3 - ctrl; P8 - ctrl; P10 - P11; P10 - P2; P10 - P3; P2 - P11; P3 - P11; P8 - P11; P3 - P2; P8 - P2; P8 - P3             |
| TC1700007790.hg.1 | TC1700007790.hg.1 | NM_001254                       | CDC6        | 990      | 10<br>2.3<br>5 | 2.06<br>E-09 | 8.68<br>64 | 1.24<br>E-08 | P10 - ctrl; ctrl - P11; P3 - ctrl; P8 - ctrl; P10 - P11; P10 - P2; P3 - P10; P8 - P10; P2 - P11; P3 - P11; P8 - P11; P3 - P2; P8 - P2           |
| TC1500009738.hg.1 | TC1500009738.hg.1 | NM_001029989                    | KIAA0101    | 9768     | 10<br>2.2<br>1 | 2.07<br>E-09 | 8.68<br>3  | 1.24<br>E-08 | P10 - ctrl; ctrl - P11; ctrl - P2; P3 - ctrl; P8 - ctrl; P10 - P11; P10 - P2; P10 - P3; P8 - P10; P3 - P11; P8 - P11; P3 - P2; P8 - P2; P8 - P3 |
| TC0100013561.hg.1 | TC0100013561.hg.1 | NM_004102                       | FABP3       | 2170     | 10<br>2.0<br>8 | 2.09<br>E-09 | 8.67<br>98 | 1.25<br>E-08 | ctrl - P10; P11 - ctrl; ctrl - P2; ctrl - P3; ctrl - P8; P11 - P10; P10 - P3; P10 - P8; P11 - P2; P11 - P3; P11 - P8; P2 - P8                   |
| TC1000008731.hg.1 | TC1000008731.hg.1 | NR_038937                       | RPARP-AS1   | 1.01E+08 | 10<br>2.0<br>1 | 2.10<br>E-09 | 8.67<br>79 | 1.25<br>E-08 | ctrl - P10; P11 - ctrl; ctrl - P2; ctrl - P3; ctrl - P8; P11 - P10; P2 - P10; P3 - P10; P11 - P2; P11 - P3; P11 - P8; P2 - P3; P2 - P8; P3 - P8 |
| TC1700008247.hg.1 | TC1700008247.hg.1 | NM_001168215                    | TMEM92      | 162461   | 10<br>1.3<br>6 | 2.18<br>E-09 | 8.66<br>17 | 1.30<br>E-08 | P10 - ctrl; P3 - ctrl; P8 - ctrl; P10 - P11; P10 - P2; P8 - P10; P2 - P11; P3 - P11; P8 - P11; P3 - P2; P8 - P2; P8 - P3                        |
| TC1700012468.hg.1 | TC1700012468.hg.1 | NM_001002032                    | HN1         | 51155    | 10<br>1.2<br>4 | 2.19<br>E-09 | 8.65<br>86 | 1.30<br>E-08 | P10 - ctrl; ctrl - P11; ctrl - P2; P3 - ctrl; P8 - ctrl; P10 - P11; P10 - P2; P10 - P3; P3 - P11; P8 - P11; P3 - P2; P8 - P2; P8 - P3           |
| TC1000011524.hg.1 | TC1000011524.hg.1 | NM_152309                       | PIK3AP1     | 118788   | 10<br>0.8<br>4 | 2.25<br>E-09 | 8.64<br>86 | 1.33<br>E-08 | P10 - ctrl; ctrl - P11; P2 - ctrl; P3 - ctrl; P8 - ctrl; P10 - P11; P10 - P2; P10 - P3; P2 - P11; P3 - P11; P8 - P11; P3 - P2; P8 - P2; P8 - P3 |
| TC1400007950.hg.1 | TC1400007950.hg.1 | NM_006888                       | CALM1       | 801      | 10<br>0.8<br>2 | 2.25<br>E-09 | 8.64<br>83 | 1.33<br>E-08 | P10 - ctrl; ctrl - P11; P3 - ctrl; P8 - ctrl; P10 - P11; P10 - P2; P10 - P3; P2 - P11; P3 - P11; P8 - P11; P3 - P2; P8 - P2; P8 - P3            |
| TC1100012788.hg.1 | TC1100012788.hg.1 | NA                              | NA          | NA       | 10<br>0.7<br>7 | 2.26<br>E-09 | 8.64<br>68 | 1.33<br>E-08 | ctrl - P10; ctrl - P11; ctrl - P2; ctrl - P3; ctrl - P8; P11 - P10; P2 - P10; P11 - P2; P11 - P3; P11 - P8; P2 - P3; P2 - P8                    |
| TC0600007006.hg.1 | TC0600007006.hg.1 | NM_001165032                    | RNF182      | 221687   | 10<br>0.2<br>9 | 2.32<br>E-09 | 8.63<br>49 | 1.36<br>E-08 | ctrl - P10; ctrl - P11; ctrl - P2; ctrl - P3; P11 - P10; P2 - P10; P3 - P10; P8 - P10; P11 - P2; P3 - P11; P11 - P8; P3 - P2; P2 - P8; P3 - P8  |

|                   |                   |                                 |              |              |                |              |            |              |                                                                                                                                                           |
|-------------------|-------------------|---------------------------------|--------------|--------------|----------------|--------------|------------|--------------|-----------------------------------------------------------------------------------------------------------------------------------------------------------|
| TC1500008995.hg.1 | TC1500008995.hg.1 | NM_001023567                    | GOLGA8B      | 440270       | 10<br>0.1<br>6 | 2.34<br>E-09 | 8.63<br>16 | 1.37<br>E-08 | ctrl - P10; ctrl - P11; ctrl - P2; ctrl - P3; ctrl - P8; P11 - P10; P2 - P10; P3 - P10; P2 - P11; P11 - P8; P2 - P3; P2 - P8; P3 - P8                     |
| TC0500011062.hg.1 | TC0500011062.hg.1 | kleyplarby.aAug10-<br>unspliced | kleyplarby   | NA           | 99.<br>78      | 2.39<br>E-09 | 8.62<br>19 | 1.40<br>E-08 | ctrl - P10; ctrl - P11; P2 - ctrl; ctrl - P3; ctrl - P8; P11 - P10; P2 - P10; P3 - P10; P10 - P8; P2 - P11; P11 - P8; P2 - P3; P2 - P8; P3 - P8           |
| TC1100011834.hg.1 | TC1100011834.hg.1 | riyare.aAug10-<br>unspliced     | riyare       | NA           | 99.<br>55<br>5 | 2.42<br>E-09 | 8.61<br>62 | 1.41<br>E-08 | ctrl - P10; ctrl - P11; ctrl - P2; ctrl - P3; ctrl - P8; P11 - P10; P2 - P10; P3 - P10; P10 - P8; P2 - P11; P3 - P11; P11 - P8; P2 - P3; P2 - P8; P3 - P8 |
| TC0700008053.hg.1 | TC0700008053.hg.1 | snarsharby.aAug10-<br>unspliced | snarsharby   | NA           | 99.<br>49<br>1 | 2.43<br>E-09 | 8.61<br>46 | 1.41<br>E-08 | ctrl - P10; ctrl - P11; ctrl - P3; ctrl - P8; P11 - P10; P2 - P10; P3 - P10; P2 - P11; P3 - P11; P11 - P8; P2 - P3; P2 - P8; P3 - P8                      |
| TC0100017313.hg.1 | TC0100017313.hg.1 | peenubu.aAug10-<br>unspliced    | peenubu      | NA           | 99.<br>35<br>8 | 2.45<br>E-09 | 8.61<br>12 | 1.42<br>E-08 | ctrl - P10; ctrl - P2; ctrl - P3; ctrl - P8; P11 - P10; P2 - P10; P3 - P10; P10 - P8; P11 - P3; P11 - P8; P2 - P3; P2 - P8; P3 - P8                       |
| TC0800009600.hg.1 | TC0800009600.hg.1 | NM_053279                       | FAM167A      | 83648        | 98.<br>97<br>7 | 2.50<br>E-09 | 8.60<br>15 | 1.45<br>E-08 | P10 - ctrl; ctrl - P2; ctrl - P3; P8 - ctrl; P10 - P11; P10 - P2; P10 - P3; P11 - P2; P11 - P3; P8 - P11; P3 - P2; P8 - P2; P8 - P3                       |
| TC0900010262.hg.1 | TC0900010262.hg.1 | gleytoyby.aAug10-<br>unspliced  | gleytoyby    | NA           | 98.<br>82<br>3 | 2.53<br>E-09 | 8.59<br>76 | 1.46<br>E-08 | ctrl - P11; P2 - ctrl; P3 - ctrl; ctrl - P8; P10 - P11; P2 - P10; P3 - P10; P10 - P8; P2 - P11; P3 - P11; P8 - P11; P2 - P3; P2 - P8; P3 - P8             |
| TC0800010252.hg.1 | TC0800010252.hg.1 | NM_000037                       | ANK1         | 286          | 98.<br>51<br>4 | 2.57<br>E-09 | 8.58<br>96 | 1.48<br>E-08 | P10 - ctrl; P11 - ctrl; P2 - ctrl; P3 - ctrl; P8 - ctrl; P10 - P2; P3 - P10; P8 - P10; P11 - P2; P3 - P11; P3 - P2; P8 - P2                               |
| TC1700012191.hg.1 | TC1700012191.hg.1 | NM_001040059                    | CD68         | 968          | 98.<br>43<br>2 | 2.59<br>E-09 | 8.58<br>75 | 1.49<br>E-08 | P10 - ctrl; P11 - ctrl; ctrl - P2; P3 - ctrl; P8 - ctrl; P10 - P2; P3 - P10; P10 - P8; P11 - P2; P11 - P8; P3 - P2; P8 - P2; P3 - P8                      |
| TC1500007410.hg.1 | TC1500007410.hg.1 | morser.aAug10-<br>unspliced     | morser       | NA           | 98.<br>38<br>8 | 2.59<br>E-09 | 8.58<br>64 | 1.49<br>E-08 | P10 - ctrl; P11 - ctrl; P3 - ctrl; P8 - ctrl; P10 - P11; P10 - P2; P8 - P10; P11 - P2; P3 - P11; P8 - P11; P3 - P2; P8 - P2; P8 - P3                      |
| TC0800007674.hg.1 | TC0800007674.hg.1 | ENST00000520251                 | LOC105375844 | 1.05E+<br>08 | 98.<br>38<br>3 | 2.59<br>E-09 | 8.58<br>63 | 1.49<br>E-08 | ctrl - P11; P2 - ctrl; P3 - ctrl; ctrl - P8; P10 - P11; P2 - P10; P3 - P10; P10 - P8; P2 - P11; P3 - P11; P11 - P8; P2 - P3; P2 - P8; P3 - P8             |
| TC0Y00007309.hg.1 | TC0Y00007309.hg.1 | blabo.aAug10-<br>unspliced      | blabo        | NA           | 98.<br>29<br>4 | 2.61<br>E-09 | 8.58<br>4  | 1.49<br>E-08 | ctrl - P10; ctrl - P11; ctrl - P2; ctrl - P3; ctrl - P8; P11 - P10; P3 - P10; P8 - P10; P11 - P2; P3 - P11; P11 - P8; P3 - P2; P8 - P2; P3 - P8           |
| TC0600008563.hg.1 | TC0600008563.hg.1 | uc063pqw.1                      | RNU6-1016P   | NA           | 98.<br>06<br>7 | 2.64<br>E-09 | 8.57<br>81 | 1.51<br>E-08 | ctrl - P10; ctrl - P11; P2 - ctrl; ctrl - P3; ctrl - P8; P11 - P10; P2 - P10; P3 - P10; P2 - P11; P3 - P11; P11 - P8; P2 - P3; P2 - P8; P3 - P8           |
| TC1500006588.hg.1 | TC1500006588.hg.1 | NR_003303                       | SNORD115-11  | 15q11.<br>2  | 97.<br>85<br>8 | 2.67<br>E-09 | 8.57<br>27 | 1.51<br>E-08 | P10 - ctrl; P11 - ctrl; P2 - ctrl; P3 - ctrl; P8 - ctrl; P10 - P11; P10 - P2; P3 - P10; P3 - P11; P8 - P11; P3 - P2; P8 - P2; P3 - P8                     |
| TC1500006603.hg.1 | TC1500006603.hg.1 | ENST00000362834                 | SNORD115-29  | 15q11.<br>2  | 97.<br>85<br>8 | 2.67<br>E-09 | 8.57<br>27 | 1.51<br>E-08 | P10 - ctrl; P11 - ctrl; P2 - ctrl; P3 - ctrl; P8 - ctrl; P10 - P11; P10 - P2; P3 - P10; P3 - P11; P8 - P11; P3 - P2; P8 - P2; P3 - P8                     |
| TC1500006604.hg.1 | TC1500006604.hg.1 | ENST00000365629                 | SNORD115-36  | 15q11.<br>2  | 97.<br>85<br>8 | 2.67<br>E-09 | 8.57<br>27 | 1.51<br>E-08 | P10 - ctrl; P11 - ctrl; P2 - ctrl; P3 - ctrl; P8 - ctrl; P10 - P11; P10 - P2; P3 - P10; P3 - P11; P8 - P11; P3 - P2; P8 - P2; P3 - P8                     |
| TC1500006607.hg.1 | TC1500006607.hg.1 | ENST00000365503                 | SNORD115-43  | 15q11.<br>2  | 97.<br>85<br>8 | 2.67<br>E-09 | 8.57<br>27 | 1.51<br>E-08 | P10 - ctrl; P11 - ctrl; P2 - ctrl; P3 - ctrl; P8 - ctrl; P10 - P11; P10 - P2; P3 - P10; P3 - P11; P8 - P11; P3 - P2; P8 - P2; P3 - P8                     |
| TC1500006598.hg.1 | TC1500006598.hg.1 | NR_003314                       | SNORD115-22  | 15q11.<br>2  | 97.<br>25<br>4 | 2.77<br>E-09 | 8.55<br>71 | 1.56<br>E-08 | P10 - ctrl; P11 - ctrl; P2 - ctrl; P3 - ctrl; P8 - ctrl; P10 - P11; P10 - P2; P3 - P10; P3 - P11; P8 - P11; P3 - P2; P8 - P2; P3 - P8                     |
| TC0200016684.hg.1 | TC0200016684.hg.1 | NM_022037                       | TIA1         | 7072         | 97.<br>04<br>7 | 2.81<br>E-09 | 8.55<br>17 | 1.58<br>E-08 | ctrl - P10; ctrl - P11; ctrl - P3; ctrl - P8; P11 - P10; P2 - P10; P3 - P10; P8 - P10; P2 - P11; P11 - P3; P11 - P8; P2 - P3; P2 - P8                     |
| TC0600006976.hg.1 | TC0600006976.hg.1 | NM_001242648                    | PHACTR1      | 221692       | 96.<br>87<br>8 | 2.84<br>E-09 | 8.54<br>71 | 1.59<br>E-08 | ctrl - P10; P11 - ctrl; ctrl - P2; ctrl - P3; ctrl - P8; P11 - P10; P2 - P10; P3 - P10; P10 - P8; P11 - P2; P11 - P3; P11 - P8; P2 - P3; P2 - P8; P3 - P8 |
| TC1500007392.hg.1 | TC1500007392.hg.1 | NM_004701                       | CCNB2        | 9133         | 96.<br>29<br>8 | 2.94<br>E-09 | 8.53<br>21 | 1.65<br>E-08 | P10 - ctrl; ctrl - P2; P3 - ctrl; P8 - ctrl; P10 - P11; P10 - P2; P10 - P3; P8 - P10; P11 - P2; P3 - P11; P8 - P11; P3 - P2; P8 - P2; P8 - P3             |
| TC2100006539.hg.1 | TC2100006539.hg.1 | NA                              | NA           | NA           | 96.<br>20<br>4 | 2.95<br>E-09 | 8.52<br>96 | 1.65<br>E-08 | ctrl - P11; P2 - ctrl; P3 - ctrl; ctrl - P8; P10 - P11; P2 - P10; P3 - P10; P10 - P8; P2 - P11; P3 - P11; P8 - P11; P2 - P3; P2 - P8; P3 - P8             |
| TC0600008544.hg.1 | TC0600008544.hg.1 | NR_110856                       | LOC101928516 | 1.02E+<br>08 | 96.<br>16<br>9 | 2.96<br>E-09 | 8.52<br>87 | 1.65<br>E-08 | P10 - ctrl; P2 - ctrl; P3 - ctrl; P8 - ctrl; P10 - P11; P10 - P3; P2 - P11; P3 - P11; P8 - P11; P2 - P3; P8 - P3                                          |
| TC1700012395.hg.1 | TC1700012395.hg.1 | OTTHUMT00000477<br>403          | TBC1D3L      | 1.01E+<br>08 | 95.<br>92<br>4 | 3.00<br>E-09 | 8.52<br>22 | 1.67<br>E-08 | ctrl - P10; ctrl - P11; ctrl - P3; ctrl - P8; P11 - P10; P2 - P10; P3 - P10; P2 - P11; P11 - P8; P2 - P3; P2 - P8; P3 - P8                                |
| TC0700008100.hg.1 | TC0700008100.hg.1 | barmorby.aAug10-<br>unspliced   | barmorby     | NA           | 95.<br>89<br>7 | 3.01<br>E-09 | 8.52<br>15 | 1.67<br>E-08 | ctrl - P10; ctrl - P11; ctrl - P3; ctrl - P8; P11 - P10; P2 - P10; P3 - P10; P2 - P11; P11 - P8; P2 - P3; P2 - P8; P3 - P8                                |
| TC2000007503.hg.1 | TC2000007503.hg.1 | NM_001281741                    | UBE2C        | 11065        | 95.<br>76<br>2 | 3.03<br>E-09 | 8.51<br>8  | 1.68<br>E-08 | P10 - ctrl; ctrl - P2; P8 - ctrl; P10 - P11; P10 - P2; P10 - P3; P8 - P10; P3 - P11; P8 - P11; P3 - P2; P8 - P2; P8 - P3                                  |
| TC0400012971.hg.1 | TC0400012971.hg.1 | NA                              | NA           | NA           | 95.<br>47<br>6 | 3.09<br>E-09 | 8.51<br>04 | 1.71<br>E-08 | ctrl - P10; ctrl - P11; ctrl - P2; ctrl - P3; ctrl - P8; P11 - P10; P2 - P10; P3 - P10; P11 - P2; P11 - P3; P11 - P8; P2 - P8; P3 - P8                    |
| TC0600013757.hg.1 | TC0600013757.hg.1 | NM_000636                       | SOD2         | 6648         | 95.<br>39<br>1 | 3.10<br>E-09 | 8.50<br>81 | 1.71<br>E-08 | P10 - ctrl; P11 - ctrl; P3 - ctrl; P8 - ctrl; P10 - P11; P10 - P2; P10 - P3; P10 - P8; P11 - P2; P8 - P11; P3 - P2; P8 - P2; P8 - P3                      |
| TC0700012096.hg.1 | TC0700012096.hg.1 | boneyby.aAug10-<br>unspliced    | boneyby      | NA           | 95.<br>26<br>5 | 3.13<br>E-09 | 8.50<br>48 | 1.72<br>E-08 | ctrl - P10; ctrl - P11; P2 - ctrl; ctrl - P3; ctrl - P8; P2 - P10; P3 - P10; P10 - P8; P2 - P11; P3 - P11; P11 - P8; P2 - P3; P2 - P8; P3 - P8            |
| TC2000007089.hg.1 | TC2000007089.hg.1 | NM_012112                       | TPX2         | 22974        | 95.<br>19<br>2 | 3.14<br>E-09 | 8.50<br>29 | 1.73<br>E-08 | P10 - ctrl; ctrl - P11; ctrl - P2; P3 - ctrl; P8 - ctrl; P10 - P11; P10 - P2; P10 - P3; P8 - P10; P3 - P11; P8 - P11; P3 - P2; P8 - P2; P8 - P3           |
| TC1000010727.hg.1 | TC1000010727.hg.1 | NM_001149                       | ANK3         | 288          | 95.<br>10<br>3 | 3.16<br>E-09 | 8.50<br>05 | 1.73<br>E-08 | ctrl - P10; ctrl - P3; ctrl - P8; P11 - P10; P2 - P10; P11 - P3; P11 - P8; P2 - P3; P2 - P8                                                               |
| TC1100011185.hg.1 | TC1100011185.hg.1 | NA                              | NA           | NA           | 94.<br>79<br>6 | 3.22<br>E-09 | 8.49<br>23 | 1.76<br>E-08 | ctrl - P10; ctrl - P11; ctrl - P3; ctrl - P8; P11 - P10; P2 - P10; P3 - P10; P2 - P11; P11 - P8; P2 - P3; P2 - P8; P3 - P8                                |

|                   |                   |                                |               |        |             |              |              |              |                                                                                                                                                  |
|-------------------|-------------------|--------------------------------|---------------|--------|-------------|--------------|--------------|--------------|--------------------------------------------------------------------------------------------------------------------------------------------------|
| TC0500011004.hg.1 | TC0500011004.hg.1 | OTTHUMT00000369094             | GUSBP3        | 653188 | 94.72<br>4  | 3.23<br>E-09 | 8.49<br>04   | 1.76<br>E-08 | ctrl - P10; ctrl - P11; ctrl - P3; ctrl - P8; P11 - P10; P2 - P10; P3 - P10; P10 - P8; P2 - P11; P11 - P3; P11 - P8; P2 - P3; P2 - P8; P3 - P8   |
| TC0100018431.hg.1 | TC0100018431.hg.1 | ENST00000466213                | SFPQ          | 1p34.3 | 94.25<br>9  | 3.33<br>E-09 | 8.47<br>8    | 1.81<br>E-08 | ctrl - P10; ctrl - P11; ctrl - P3; ctrl - P8; P11 - P10; P2 - P10; P3 - P10; P8 - P10; P2 - P11; P11 - P8; P2 - P3; P2 - P8; P3 - P8             |
| TC0600011809.hg.1 | TC0600011809.hg.1 | NM_001136017                   | CCND3         | 896    | 94.20<br>1  | 3.34<br>E-09 | 8.47<br>64   | 1.81<br>E-08 | P10 - ctrl; ctrl - P11; ctrl - P2; P3 - ctrl; P8 - ctrl; P10 - P11; P10 - P2; P3 - P10; P3 - P11; P8 - P11; P3 - P2; P8 - P2                     |
| TC2000008315.hg.1 | TC2000008315.hg.1 | NA                             | NA            | NA     | 94.12<br>7  | 3.35<br>E-09 | 8.47<br>44   | 1.82<br>E-08 | ctrl - P11; ctrl - P2; P3 - ctrl; P8 - ctrl; P10 - P11; P10 - P2; P3 - P10; P8 - P10; P2 - P11; P3 - P11; P8 - P11; P3 - P2; P8 - P2             |
| TC1700008103.hg.1 | TC1700008103.hg.1 | NA                             | NA            | NA     | 94.09<br>9  | 3.36<br>E-09 | 8.47<br>34   | 1.82<br>E-08 | ctrl - P10; ctrl - P11; ctrl - P2; ctrl - P3; ctrl - P8; P11 - P10; P2 - P10; P10 - P8; P2 - P11; P11 - P8; P2 - P3; P2 - P8; P3 - P8            |
| TC1300008558.hg.1 | TC1300008558.hg.1 | NR_026928                      | N4BP2L2-IT2   | 116828 | 94.05<br>3  | 3.37<br>E-09 | 8.47<br>24   | 1.82<br>E-08 | ctrl - P10; ctrl - P11; P2 - ctrl; ctrl - P3; ctrl - P8; P11 - P10; P2 - P10; P3 - P10; P10 - P8; P2 - P11; P11 - P8; P2 - P3; P2 - P8; P3 - P8  |
| TC0100014543.hg.1 | TC0100014543.hg.1 | NM_001114120                   | DEPDC1        | 55635  | 94.00<br>5  | 3.38<br>E-09 | 8.47<br>11   | 1.82<br>E-08 | P10 - ctrl; ctrl - P11; ctrl - P2; P8 - ctrl; P10 - P11; P10 - P2; P10 - P3; P8 - P10; P3 - P11; P8 - P11; P3 - P2; P8 - P2; P8 - P3             |
| TC1900008287.hg.1 | TC1900008287.hg.1 | NM_001042724                   | PVRL2         | 5819   | 93.62<br>5  | 3.46<br>E-09 | 8.46<br>09   | 1.86<br>E-08 | P10 - ctrl; ctrl - P11; ctrl - P2; P8 - ctrl; P10 - P11; P10 - P2; P10 - P3; P8 - P10; P11 - P2; P3 - P11; P8 - P11; P3 - P2; P8 - P2; P8 - P3   |
| TC0700011519.hg.1 | TC0700011519.hg.1 | NR_040584                      | STAG3L2       | 442582 | 93.62<br>9  | 3.46<br>E-09 | 8.46<br>08   | 1.86<br>E-08 | ctrl - P10; ctrl - P11; ctrl - P3; ctrl - P8; P11 - P10; P2 - P10; P3 - P10; P2 - P11; P11 - P8; P2 - P3; P2 - P8; P3 - P8                       |
| TC1100007727.hg.1 | TC1100007727.hg.1 | NM_001142703                   | FAM111B       | 374393 | 93.58<br>1  | 3.47<br>E-09 | 8.45<br>97   | 1.86<br>E-08 | P10 - ctrl; ctrl - P11; ctrl - P2; P3 - ctrl; P8 - ctrl; P10 - P11; P10 - P2; P3 - P10; P8 - P10; P2 - P11; P3 - P11; P8 - P11; P3 - P2; P8 - P2 |
| TC0200007717.hg.1 | TC0200007717.hg.1 | NM_152392                      | AHSA2         | 130872 | 93.48<br>3  | 3.49<br>E-09 | 8.45<br>71   | 1.86<br>E-08 | ctrl - P10; ctrl - P11; ctrl - P2; ctrl - P3; ctrl - P8; P11 - P10; P2 - P10; P3 - P10; P2 - P11; P11 - P8; P2 - P3; P2 - P8; P3 - P8            |
| TC0100010544.hg.1 | TC0100010544.hg.1 | momybu.aAug10-<br>unspliced    | momybu        | NA     | 93.46<br>4  | 3.49<br>E-09 | 8.45<br>66   | 1.86<br>E-08 | ctrl - P10; ctrl - P11; ctrl - P3; ctrl - P8; P11 - P10; P2 - P10; P10 - P3; P10 - P8; P2 - P11; P11 - P3; P11 - P8; P2 - P3; P2 - P8            |
| TC0400008007.hg.1 | TC0400008007.hg.1 | NM_001256421                   | GPAT3         | 84803  | 93.42<br>1  | 3.50<br>E-09 | 8.45<br>54   | 1.86<br>E-08 | P10 - ctrl; ctrl - P2; P3 - ctrl; P8 - ctrl; P10 - P11; P10 - P2; P11 - P2; P3 - P11; P8 - P11; P3 - P2; P8 - P2                                 |
| TC0300013863.hg.1 | TC0300013863.hg.1 | NM_006952                      | UPK1B         | 7348   | 92.97<br>6  | 3.60<br>E-09 | 8.44<br>34   | 1.91<br>E-08 | ctrl - P10; ctrl - P11; ctrl - P2; P3 - ctrl; ctrl - P8; P11 - P10; P2 - P10; P3 - P10; P8 - P10; P3 - P11; P8 - P11; P3 - P2; P8 - P2; P3 - P8  |
| TC1300007561.hg.1 | TC1300007561.hg.1 | NM_001160706                   | SCEL          | 8796   | 92.49<br>6  | 3.71<br>E-09 | 8.43<br>03   | 1.97<br>E-08 | P10 - ctrl; ctrl - P2; P3 - ctrl; P8 - ctrl; P10 - P11; P10 - P2; P3 - P10; P8 - P10; P3 - P11; P8 - P11; P3 - P2; P8 - P2                       |
| TC2000008722.hg.1 | TC2000008722.hg.1 | NM_001252675                   | ACSS1         | 84532  | 92.21<br>8  | 3.78<br>E-09 | 8.42<br>27   | 2.00<br>E-08 | ctrl - P10; ctrl - P2; ctrl - P3; ctrl - P8; P11 - P10; P10 - P3; P10 - P8; P11 - P2; P11 - P3; P11 - P8; P2 - P8                                |
| TC1100008453.hg.1 | TC1100008453.hg.1 | NM_001145211                   | SLCO2B1       | 11309  | 92.05<br>2  | 3.82<br>E-09 | 8.41<br>81   | 2.01<br>E-08 | P10 - ctrl; P3 - ctrl; P8 - ctrl; P10 - P11; P10 - P2; P3 - P10; P8 - P10; P3 - P11; P8 - P11; P3 - P2; P8 - P2; P8 - P3                         |
| TC1500009813.hg.1 | TC1500009813.hg.1 | ENST00000288745                | MEGF11        | 84465  | 91.81<br>2  | 3.88<br>E-09 | 8.41<br>15   | 2.04<br>E-08 | P10 - ctrl; P2 - ctrl; P3 - ctrl; P8 - ctrl; P10 - P11; P10 - P2; P10 - P3; P10 - P8; P2 - P11; P3 - P11; P8 - P11; P8 - P11; P8 - P2; P8 - P3   |
| TC0700010443.hg.1 | TC0700010443.hg.1 | NM_001164460                   | STEAP1B       | 256227 | 91.80<br>3  | 3.88<br>E-09 | 8.41<br>13   | 2.04<br>E-08 | P10 - ctrl; P11 - ctrl; P3 - ctrl; P8 - ctrl; P10 - P11; P10 - P2; P3 - P10; P8 - P10; P3 - P11; P8 - P11; P3 - P2; P8 - P2                      |
| TC1500009806.hg.1 | TC1500009806.hg.1 | uc059kld.1                     | snoU13        | NA     | 91.75<br>7  | 3.89<br>E-09 | 8.41<br>E-08 | 2.04<br>E-08 | ctrl - P10; ctrl - P11; P2 - ctrl; ctrl - P3; ctrl - P8; P11 - P10; P2 - P10; P3 - P10; P2 - P11; P11 - P8; P2 - P3; P2 - P8; P3 - P8            |
| TC0500007761.hg.1 | TC0500007761.hg.1 | NM_001161342                   | TMEM171       | 134285 | 91.51<br>5  | 3.95<br>E-09 | 8.40<br>33   | 2.07<br>E-08 | ctrl - P10; ctrl - P11; ctrl - P2; ctrl - P3; ctrl - P8; P11 - P10; P10 - P2; P10 - P3; P11 - P2; P11 - P3; P11 - P8; P8 - P2; P8 - P3           |
| TC0700011396.hg.1 | TC0700011396.hg.1 | NA                             | NA            | NA     | 91.23<br>1  | 4.02<br>E-09 | 8.39<br>55   | 2.10<br>E-08 | ctrl - P10; ctrl - P11; P2 - ctrl; ctrl - P3; ctrl - P8; P2 - P10; P3 - P10; P10 - P8; P2 - P11; P3 - P11; P11 - P8; P2 - P3; P2 - P8; P3 - P8   |
| TC0100013872.hg.1 | TC0100013872.hg.1 | NM_001302269                   | EDN2          | 1907   | 91.22<br>4  | 4.02<br>E-09 | 8.39<br>53   | 2.10<br>E-08 | ctrl - P11; ctrl - P2; ctrl - P3; P8 - ctrl; P10 - P11; P10 - P2; P10 - P3; P8 - P10; P3 - P11; P8 - P11; P3 - P2; P8 - P2; P8 - P3              |
| TC0800007187.hg.1 | TC0800007187.hg.1 | mayaya.aAug10-<br>unspliced    | mayaya        | NA     | 91.15<br>3  | 4.04<br>E-09 | 8.39<br>33   | 2.10<br>E-08 | ctrl - P10; ctrl - P11; P2 - ctrl; ctrl - P3; ctrl - P8; P10 - P11; P2 - P10; P10 - P8; P2 - P11; P3 - P11; P2 - P3; P2 - P8; P3 - P8            |
| TC0300012814.hg.1 | TC0300012814.hg.1 | NM_023915                      | GPR87         | 53836  | 90.65<br>1  | 4.17<br>E-09 | 8.37<br>94   | 2.16<br>E-08 | P10 - ctrl; ctrl - P11; P3 - ctrl; P8 - ctrl; P10 - P11; P10 - P2; P3 - P10; P8 - P10; P2 - P11; P3 - P11; P8 - P11; P3 - P2; P8 - P2            |
| TC0700012913.hg.1 | TC0700012913.hg.1 | kosmarbu.aAug10-<br>unspliced  | kosmarbu      | NA     | 90.90<br>62 | 4.18<br>E-09 | 8.37<br>85   | 2.16<br>E-08 | ctrl - P10; ctrl - P11; P2 - ctrl; ctrl - P3; ctrl - P8; P11 - P10; P2 - P10; P3 - P10; P10 - P8; P2 - P11; P11 - P8; P2 - P3; P2 - P8; P3 - P8  |
| TC0100011533.hg.1 | TC0100011533.hg.1 | NM_001030287                   | ATF3          | 467    | 90.57<br>4  | 4.20<br>E-09 | 8.37<br>73   | 2.17<br>E-08 | P10 - ctrl; P11 - ctrl; P2 - ctrl; P3 - ctrl; P8 - ctrl; P10 - P11; P10 - P2; P10 - P3; P8 - P10; P3 - P11; P8 - P11; P3 - P2; P8 - P2; P8 - P3  |
| TC0200009739.hg.1 | TC0200009739.hg.1 | NM_014568                      | GALNT5        | 11227  | 90.50<br>1  | 4.21<br>E-09 | 8.37<br>52   | 2.17<br>E-08 | P10 - ctrl; P2 - ctrl; P3 - ctrl; P8 - ctrl; P10 - P11; P10 - P2; P8 - P10; P2 - P11; P3 - P11; P8 - P11; P3 - P2; P8 - P2; P8 - P3              |
| TC1200010038.hg.1 | TC1200010038.hg.1 | NM_004447                      | EPS8          | 2059   | 90.42<br>3  | 4.24<br>E-09 | 8.37<br>3    | 2.18<br>E-08 | P10 - ctrl; P2 - ctrl; P3 - ctrl; P8 - ctrl; P10 - P11; P10 - P2; P10 - P3; P10 - P8; P2 - P11; P3 - P11; P8 - P11; P8 - P2; P8 - P3             |
| TC0500010510.hg.1 | TC0500010510.hg.1 | NA                             | NA            | NA     | 90.90<br>35 | 4.26<br>E-09 | 8.37<br>1    | 2.18<br>E-08 | ctrl - P10; ctrl - P11; P2 - ctrl; ctrl - P3; ctrl - P8; P2 - P10; P3 - P10; P10 - P8; P2 - P11; P3 - P11; P11 - P8; P2 - P3; P2 - P8; P3 - P8   |
| TC0600008146.hg.1 | TC0600008146.hg.1 | NM_001015051                   | RUNX2         | 860    | 89.92<br>1  | 4.38<br>E-09 | 8.35<br>9    | 2.24<br>E-08 | P10 - ctrl; ctrl - P2; P3 - ctrl; P8 - ctrl; P10 - P11; P10 - P2; P3 - P10; P8 - P10; P11 - P2; P3 - P11; P8 - P11; P3 - P2; P8 - P2             |
| TC0800007640.hg.1 | TC0800007640.hg.1 | ENST00000517688                | RP11-463C14.1 | NA     | 89.58<br>1  | 4.47<br>E-09 | 8.34<br>94   | 2.29<br>E-08 | ctrl - P10; ctrl - P2; ctrl - P3; ctrl - P8; P11 - P10; P2 - P10; P3 - P10; P11 - P2; P11 - P3; P11 - P8; P2 - P8; P3 - P8                       |
| TC0800007732.hg.1 | TC0800007732.hg.1 | toyskoybu.aAug10-<br>unspliced | toyskoybu     | NA     | 89.42<br>7  | 4.52<br>E-09 | 8.34<br>51   | 2.30<br>E-08 | ctrl - P10; ctrl - P11; P2 - ctrl; ctrl - P3; ctrl - P8; P11 - P10; P2 - P10; P3 - P10; P10 - P8; P2 - P11; P11 - P8; P2 - P3; P2 - P8; P3 - P8  |

|                                     |                                     |                                |              |          |            |              |              |              |                                                                                                                                                         |
|-------------------------------------|-------------------------------------|--------------------------------|--------------|----------|------------|--------------|--------------|--------------|---------------------------------------------------------------------------------------------------------------------------------------------------------|
| TC0800008243.hg.1                   | TC0800008243.hg.1                   | NM_001161779                   | PDP1         | 54704    | 89.38<br>6 | 4.53<br>E-09 | 8.34<br>39   | 2.31<br>E-08 | P10 - ctrl; P2 - ctrl; P3 - ctrl; P8 - ctrl; P10 - P11; P10 - P2; P10 - P3; P2 - P11; P3 - P11; P8 - P11; P3 - P2; P8 - P2; P8 - P3                     |
| TC1300009812.hg.1                   | TC1300009812.hg.1                   | ENST00000426991.1              | ANKRD10-IT1  |          | 89.14<br>9 | 4.60<br>E-09 | 8.33<br>72   | 2.34<br>E-08 | ctrl - P10; ctrl - P11; ctrl - P3; ctrl - P8; P11 - P10; P2 - P10; P3 - P10; P10 - P8; P2 - P11; P11 - P8; P2 - P3; P2 - P8; P3 - P8                    |
| TC0100009873.hg.1                   | TC0100009873.hg.1                   | uc057klq.1                     | AC239868.3   | NA       | 88.93<br>6 | 4.66<br>E-09 | 8.33<br>12   | 2.36<br>E-08 | P10 - ctrl; P11 - ctrl; ctrl - P2; P8 - ctrl; P10 - P11; P10 - P2; P10 - P3; P10 - P8; P11 - P2; P11 - P3; P8 - P11; P3 - P2; P8 - P2; P8 - P3          |
| TC1400007495.hg.1                   | TC1400007495.hg.1                   | NM_020715                      | PLEKHH1      | 57475    | 88.64<br>6 | 4.75<br>E-09 | 8.32<br>29   | 2.40<br>E-08 | ctrl - P10; ctrl - P11; ctrl - P3; ctrl - P8; P11 - P10; P2 - P10; P3 - P10; P2 - P11; P11 - P3; P11 - P8; P2 - P3; P2 - P8; P3 - P8                    |
| TC1600008917.hg.1                   | TC1600008917.hg.1                   | neereyby.aAug10-<br>unspliced  | neereyby     | NA       | 88.24<br>6 | 4.88<br>E-09 | 8.31<br>16   | 2.46<br>E-08 | ctrl - P10; ctrl - P11; P2 - ctrl; ctrl - P3; ctrl - P8; P11 - P10; P2 - P10; P3 - P10; P10 - P8; P2 - P11; P11 - P8; P2 - P3; P2 - P8; P3 - P8         |
| TC0800006975.hg.1                   | TC0800006975.hg.1                   | NM_001199                      | BMP1         | 649      | 88.20<br>7 | 4.89<br>E-09 | 8.31<br>05   | 2.47<br>E-08 | P10 - ctrl; ctrl - P2; P3 - ctrl; P8 - ctrl; P10 - P11; P10 - P2; P10 - P3; P8 - P10; P11 - P2; P11 - P3; P2 - P11; P8 - P11; P3 - P2; P8 - P2; P8 - P3 |
| TC1500007346.hg.1                   | TC1500007346.hg.1                   | NM_001252335                   | CGNL1        | 84952    | 88.04<br>7 | 4.94<br>E-09 | 8.30<br>59   | 2.49<br>E-08 | ctrl - P10; ctrl - P2; ctrl - P3; ctrl - P8; P11 - P10; P2 - P10; P3 - P10; P11 - P2; P11 - P3; P11 - P8; P3 - P2; P3 - P8                              |
| TC0500009857.hg.1                   | TC0500009857.hg.1                   | blorplaby.aAug10-<br>unspliced | blorplaby    | NA       | 87.99<br>9 | 4.96<br>E-09 | 8.30<br>45   | 2.49<br>E-08 | ctrl - P10; ctrl - P11; P2 - ctrl; ctrl - P3; ctrl - P8; P2 - P10; P10 - P8; P2 - P11; P11 - P8; P2 - P3; P2 - P8; P3 - P8                              |
| TC1900009896.hg.1                   | TC1900009896.hg.1                   | NM_001128932                   | CYP4F11      | 57834    | 87.87<br>7 | 5.06<br>E-09 | 8.29<br>59   | 2.53<br>E-08 | P10 - ctrl; P11 - ctrl; ctrl - P2; P3 - ctrl; P8 - ctrl; P10 - P11; P10 - P2; P10 - P3; P11 - P2; P3 - P11; P8 - P11; P3 - P2; P8 - P2; P8 - P3         |
| TC0600013010.hg.1                   | TC0600013010.hg.1                   | NM_005907                      | MAN1A1       | 4121     | 87.45<br>4 | 5.14<br>E-09 | 8.28<br>88   | 2.57<br>E-08 | ctrl - P10; ctrl - P2; ctrl - P3; ctrl - P8; P11 - P10; P2 - P10; P3 - P10; P11 - P2; P11 - P3; P11 - P8; P2 - P3; P2 - P8; P3 - P8                     |
| TC0X00007240.hg.1                   | TC0X00007240.hg.1                   | NM_000084                      | CLCN5        | 1184     | 87.29<br>2 | 5.20<br>E-09 | 8.28<br>41   | 2.59<br>E-08 | ctrl - P10; ctrl - P2; ctrl - P3; ctrl - P8; P11 - P10; P2 - P10; P11 - P2; P11 - P3; P11 - P8; P2 - P3; P2 - P8                                        |
| TC1400009422.hg.1                   | TC1400009422.hg.1                   | NM_001308154                   | RAB15        | 376267   | 87.28<br>7 | 5.20<br>E-09 | 8.28<br>4    | 2.59<br>E-08 | P10 - ctrl; ctrl - P2; P3 - ctrl; P8 - ctrl; P10 - P11; P10 - P2; P8 - P10; P3 - P11; P8 - P11; P3 - P2; P8 - P2; P8 - P3                               |
| TC2100006467.hg.1                   | TC2100006467.hg.1                   | NR_037458                      | MIR3687-1    | 1.01E+08 | 87.01<br>7 | 5.29<br>E-09 | 8.27<br>62   | 2.63<br>E-08 | ctrl - P10; ctrl - P11; ctrl - P3; ctrl - P8; P10 - P11; P2 - P10; P10 - P3; P10 - P8; P2 - P11; P2 - P3; P2 - P8; P8 - P3                              |
| TC22_K1270733v1_random00006440.hg.1 | TC22_K1270733v1_random00006440.hg.1 | NR_037458.4                    | MIR3687-1    |          | 87.01<br>7 | 5.29<br>E-09 | 8.27<br>62   | 2.63<br>E-08 | ctrl - P10; ctrl - P11; ctrl - P3; ctrl - P8; P10 - P11; P2 - P10; P10 - P3; P10 - P8; P2 - P11; P2 - P3; P2 - P8; P8 - P3                              |
| TC0900009425.hg.1                   | TC0900009425.hg.1                   | ENST00000457383.1              | RP11-70J12.1 |          | 86.97<br>3 | 5.31<br>E-09 | 8.27<br>49   | 2.63<br>E-08 | ctrl - P10; ctrl - P11; ctrl - P3; ctrl - P8; P11 - P10; P2 - P10; P2 - P11; P11 - P3; P11 - P8; P2 - P3; P2 - P8; P3 - P8                              |
| TC0600007111.hg.1                   | TC0600007111.hg.1                   | NA                             | NA           | NA       | 86.95<br>4 | 5.32<br>E-09 | 8.27<br>44   | 2.63<br>E-08 | P10 - ctrl; ctrl - P11; P2 - ctrl; P3 - ctrl; P8 - ctrl; P10 - P11; P10 - P2; P3 - P10; P2 - P11; P3 - P11; P8 - P11; P3 - P2; P3 - P2                  |
| TC0100008631.hg.1                   | TC0100008631.hg.1                   | NM_001308203                   | SGIP1        | 84251    | 86.80<br>3 | 5.37<br>E-09 | 8.27<br>E-08 | 2.65<br>E-08 | ctrl - P10; ctrl - P11; ctrl - P2; P3 - ctrl; ctrl - P8; P11 - P10; P2 - P10; P3 - P10; P8 - P10; P3 - P11; P3 - P2; P3 - P8                            |
| TC0100014585.hg.1                   | TC0100014585.hg.1                   | NM_173808                      | NEGR1        | 257194   | 86.77<br>1 | 5.38<br>E-09 | 8.26<br>91   | 2.65<br>E-08 | P10 - ctrl; ctrl - P2; P3 - ctrl; P8 - ctrl; P10 - P11; P10 - P2; P3 - P10; P8 - P10; P11 - P2; P3 - P11; P8 - P11; P3 - P2; P8 - P2                    |
| TC1100012389.hg.1                   | TC1100012389.hg.1                   | NM_001098517                   | CADM1        | 23705    | 86.66<br>3 | 5.42<br>E-09 | 8.26<br>59   | 2.66<br>E-08 | P10 - ctrl; P11 - ctrl; P8 - ctrl; P10 - P11; P10 - P2; P10 - P3; P10 - P8; P11 - P2; P11 - P3; P8 - P11; P8 - P2; P8 - P3                              |
| TC1100009330.hg.1                   | TC1100009330.hg.1                   | NM_032873                      | UBASH3B      | 84959    | 86.41<br>6 | 5.51<br>E-09 | 8.25<br>87   | 2.70<br>E-08 | P10 - ctrl; ctrl - P11; ctrl - P2; P3 - ctrl; P8 - ctrl; P10 - P11; P10 - P2; P3 - P10; P8 - P10; P3 - P11; P8 - P11; P3 - P2; P8 - P2; P3 - P8         |
| TC1600011546.hg.1                   | TC1600011546.hg.1                   | NM_015993                      | PLLP         | 51090    | 86.21<br>1 | 5.59<br>E-09 | 8.25<br>27   | 2.73<br>E-08 | P10 - ctrl; P2 - ctrl; P3 - ctrl; P8 - ctrl; P10 - P11; P10 - P2; P10 - P3; P8 - P10; P2 - P11; P3 - P11; P8 - P11; P3 - P2; P8 - P2; P8 - P3           |
| TC1700009075.hg.1                   | TC1700009075.hg.1                   | meeter.aAug10-<br>unspliced    | meeter       |          | 86.07<br>2 | 5.64<br>E-09 | 8.24<br>87   | 2.75<br>E-08 | P10 - ctrl; P11 - ctrl; ctrl - P2; P3 - ctrl; P8 - ctrl; P10 - P11; P10 - P2; P10 - P3; P10 - P8; P11 - P2; P11 - P3; P2 - P8; P2 - P8; P3 - P8         |
| TC0500010043.hg.1                   | TC0500010043.hg.1                   | NM_003966                      | SEMA5A       | 9037     | 85.98<br>6 | 5.68<br>E-09 | 8.24<br>E-08 | 2.76<br>E-08 | ctrl - P10; ctrl - P3; ctrl - P8; P11 - P10; P2 - P10; P3 - P10; P11 - P3; P11 - P8; P2 - P3; P2 - P8; P3 - P8                                          |
| TC0200011107.hg.1                   | TC0200011107.hg.1                   | NM_001243252                   | EFHD1        | 80303    | 85.86<br>3 | 5.72<br>E-09 | 8.24<br>25   | 2.78<br>E-08 | ctrl - P10; ctrl - P2; ctrl - P3; ctrl - P8; P11 - P10; P10 - P2; P10 - P3; P11 - P2; P11 - P3; P11 - P8; P8 - P2; P8 - P3                              |
| TC1600011453.hg.1                   | TC1600011453.hg.1                   | NM_001197181                   | TUBB3        | 10381    | 85.49<br>4 | 5.87<br>E-09 | 8.23<br>17   | 2.85<br>E-08 | P10 - ctrl; ctrl - P2; P3 - ctrl; P8 - ctrl; P10 - P11; P10 - P2; P10 - P3; P8 - P10; P3 - P11; P8 - P11; P3 - P2; P8 - P2; P8 - P3                     |
| TC1900011383.hg.1                   | TC1900011383.hg.1                   | ENST00000413496.2              | AC008440.5   |          | 84.82<br>5 | 6.14<br>E-09 | 8.21<br>19   | 2.97<br>E-08 | P10 - ctrl; P3 - ctrl; P8 - ctrl; P10 - P11; P10 - P2; P10 - P3; P8 - P10; P3 - P11; P8 - P11; P3 - P2; P8 - P2; P8 - P3                                |
| TC1600011502.hg.1                   | TC1600011502.hg.1                   | NR_024456                      | LOC100190986 | 1E+08    | 84.78<br>7 | 6.15<br>E-09 | 8.21<br>08   | 2.98<br>E-08 | ctrl - P10; ctrl - P11; P2 - ctrl; ctrl - P3; ctrl - P8; P11 - P10; P2 - P10; P10 - P8; P2 - P11; P11 - P8; P2 - P3; P2 - P8; P3 - P8                   |
| TC0300011995.hg.1                   | TC0300011995.hg.1                   | NA                             | NA           | NA       | 84.46<br>4 | 6.29<br>E-09 | 8.20<br>12   | 3.04<br>E-08 | ctrl - P10; ctrl - P11; P2 - ctrl; ctrl - P3; ctrl - P8; P2 - P10; P10 - P8; P2 - P11; P2 - P3; P2 - P8; P3 - P8                                        |
| TC0100017172.hg.1                   | TC0100017172.hg.1                   | NM_001206696                   | IRF6         | 3664     | 84.31<br>1 | 6.36<br>E-09 | 8.19<br>66   | 3.06<br>E-08 | P10 - ctrl; ctrl - P2; P8 - ctrl; P10 - P11; P10 - P2; P10 - P3; P8 - P11; P8 - P2; P8 - P3                                                             |
| TC0200015621.hg.1                   | TC0200015621.hg.1                   | zerklu.aAug10-<br>unspliced    | zerklu       | NA       | 84.29<br>7 | 6.37<br>E-09 | 8.19<br>62   | 3.06<br>E-08 | ctrl - P10; ctrl - P3; ctrl - P8; P11 - P10; P2 - P10; P10 - P3; P10 - P8; P11 - P3; P11 - P8; P2 - P3; P2 - P8                                         |
| TC0100018528.hg.1                   | TC0100018528.hg.1                   | NM_003851                      | CREG1        | 8804     | 84.22<br>3 | 6.40<br>E-09 | 8.19<br>4    | 3.07<br>E-08 | P11 - ctrl; ctrl - P2; ctrl - P3; P11 - P10; P10 - P2; P10 - P3; P10 - P8; P11 - P2; P11 - P3; P11 - P8; P8 - P2; P8 - P3                               |
| TC0600007262.hg.1                   | TC0600007262.hg.1                   | NM_003529                      | HIST1H3A     | 8350     | 84.18<br>3 | 6.42<br>E-09 | 8.19<br>28   | 3.07<br>E-08 | P10 - ctrl; ctrl - P2; P3 - ctrl; P8 - ctrl; P10 - P11; P10 - P2; P10 - P3; P11 - P2; P3 - P11; P8 - P11; P3 - P2; P8 - P2; P8 - P3                     |
| TC1100011841.hg.1                   | TC1100011841.hg.1                   | sportobo.aAug10-<br>unspliced  | sportobo     | NA       | 84.07<br>9 | 6.46<br>E-09 | 8.18<br>97   | 3.09<br>E-08 | ctrl - P10; ctrl - P11; P2 - ctrl; ctrl - P3; ctrl - P8; P11 - P10; P2 - P10; P10 - P8; P2 - P11; P11 - P8; P2 - P3; P2 - P8; P3 - P8                   |



|                   |                   |                                |               |          |       |           |         |           |                                                                                                                                                           |
|-------------------|-------------------|--------------------------------|---------------|----------|-------|-----------|---------|-----------|-----------------------------------------------------------------------------------------------------------------------------------------------------------|
| TC0200014343.hg.1 | TC0200014343.hg.1 | NA                             | NA            | NA       | 84.01 | 6.49 E-09 | 8.18 76 | 3.10 E-08 | ctrl - P11; P2 - ctrl; P3 - ctrl; ctrl - P8; P10 - P11; P2 - P10; P3 - P10; P10 - P8; P2 - P11; P3 - P11; P8 - P11; P2 - P3; P2 - P8; P3 - P8             |
| TC2100006475.hg.1 | TC2100006475.hg.1 | uc061yyt.1                     | FP671120.1    | NA       | 83.87 | 6.55 E-09 | 8.18 37 | 3.11 E-08 | ctrl - P10; ctrl - P11; ctrl - P3; ctrl - P8; P10 - P11; P2 - P10; P10 - P3; P10 - P8; P2 - P11; P2 - P3; P2 - P8; P8 - P3                                |
| TC0500013299.hg.1 | TC0500013299.hg.1 | ENST00000623525                | RP11-125015.1 |          | 83.87 | 6.56 E-09 | 8.18 34 | 3.11 E-08 | ctrl - P10; ctrl - P11; ctrl - P3; ctrl - P8; P11 - P10; P2 - P10; P3 - P10; P2 - P11; P11 - P8; P2 - P3; P2 - P8; P3 - P8                                |
| TC1300009734.hg.1 | TC1300009734.hg.1 | plozoy.aAug10-<br>unspliced    | plozoy        | NA       | 83.73 | 6.62 E-09 | 8.17 94 | 3.14 E-08 | ctrl - P10; ctrl - P11; P2 - ctrl; ctrl - P8; P2 - P10; P3 - P10; P10 - P8; P2 - P11; P3 - P11; P11 - P8; P2 - P3; P2 - P8; P3 - P8                       |
| TC0X00010734.hg.1 | TC0X00010734.hg.1 | NM_001163278                   | TENM1         | 10178    | 83.71 | 6.63 E-09 | 8.17 86 | 3.14 E-08 | ctrl - P10; ctrl - P2; ctrl - P3; ctrl - P8; P11 - P10; P2 - P10; P3 - P10; P11 - P2; P11 - P3; P11 - P8; P2 - P3; P2 - P8; P3 - P8                       |
| TC1600007353.hg.1 | TC1600007353.hg.1 | NM_001310136                   | NPIP8         | 728734   | 83.47 | 6.74 E-09 | 8.17 16 | 3.18 E-08 | ctrl - P10; ctrl - P11; ctrl - P3; ctrl - P8; P11 - P10; P2 - P10; P3 - P10; P8 - P10; P2 - P11; P11 - P8; P2 - P3; P2 - P8; P3 - P8                      |
| TC0100016206.hg.1 | TC0100016206.hg.1 | NM_053282                      | SH2D1B        | 117157   | 83.45 | 6.75 E-09 | 8.17 1  | 3.18 E-08 | P10 - ctrl; P11 - ctrl; P2 - ctrl; P3 - ctrl; P8 - ctrl; P10 - P11; P10 - P2; P10 - P3; P3 - P11; P8 - P11; P3 - P2; P8 - P2; P8 - P3                     |
| TC1800008902.hg.1 | TC1800008902.hg.1 | gloysar.aAug10-<br>unspliced   | gloysar       | NA       | 83.41 | 6.77 E-09 | 8.16 96 | 3.18 E-08 | ctrl - P10; ctrl - P11; P2 - ctrl; ctrl - P3; ctrl - P8; P2 - P10; P2 - P11; P11 - P8; P2 - P3; P2 - P8                                                   |
| TC0400009086.hg.1 | TC0400009086.hg.1 | NM_000856                      | GUCY1A3       | 2982     | 83.25 | 6.84 E-09 | 8.16 49 | 3.21 E-08 | ctrl - P10; ctrl - P3; ctrl - P8; P11 - P10; P2 - P10; P3 - P10; P10 - P8; P11 - P3; P11 - P8; P2 - P3; P2 - P8; P3 - P8                                  |
| TC0800007186.hg.1 | TC0800007186.hg.1 | sashor.aAug10                  | sashor        | NA       | 83.23 | 6.85 E-09 | 8.16 44 | 3.21 E-08 | ctrl - P11; P2 - ctrl; ctrl - P8; P10 - P11; P2 - P10; P10 - P8; P2 - P11; P3 - P11; P2 - P3; P2 - P8; P3 - P8                                            |
| TC0900009335.hg.1 | TC0900009335.hg.1 | fleewarby.aAug10-<br>unspliced | fleewarby     |          | 82.74 | 7.09 E-09 | 8.14 94 | 3.32 E-08 | ctrl - P10; ctrl - P11; ctrl - P3; ctrl - P8; P2 - P10; P3 - P10; P10 - P8; P2 - P11; P11 - P8; P2 - P3; P2 - P8; P3 - P8                                 |
| TC0700012684.hg.1 | TC0700012684.hg.1 | NM_001628                      | AKR1B1        | 231      | 82.71 | 7.10 E-09 | 8.14 86 | 3.32 E-08 | P10 - ctrl; ctrl - P11; ctrl - P2; P3 - ctrl; P8 - ctrl; P10 - P11; P10 - P2; P3 - P10; P3 - P11; P8 - P11; P3 - P2; P8 - P2                              |
| TC1100012513.hg.1 | TC1100012513.hg.1 | NM_002105                      | H2AFX         | 3014     | 82.45 | 7.24 E-09 | 8.14 05 | 3.37 E-08 | P10 - ctrl; ctrl - P2; P3 - ctrl; P8 - ctrl; P10 - P11; P10 - P2; P10 - P3; P8 - P10; P11 - P2; P3 - P11; P8 - P11; P3 - P2; P8 - P2; P8 - P3             |
| TC0500013184.hg.1 | TC0500013184.hg.1 | NR_029426                      | SMA4          | 11039    | 82.28 | 7.32 E-09 | 8.13 53 | 3.41 E-08 | ctrl - P10; ctrl - P11; ctrl - P3; ctrl - P8; P11 - P10; P2 - P10; P3 - P10; P10 - P8; P2 - P11; P11 - P3; P11 - P8; P2 - P3; P2 - P8; P3 - P8            |
| TC0200016503.hg.1 | TC0200016503.hg.1 | NM_006236                      | POU3F3        | 5455     | 82.15 | 7.39 E-09 | 8.13 14 | 3.43 E-08 | ctrl - P10; P11 - ctrl; ctrl - P2; ctrl - P3; ctrl - P8; P11 - P10; P2 - P10; P3 - P10; P11 - P2; P11 - P3; P11 - P8; P2 - P3; P2 - P8; P3 - P8           |
| TC0600007376.hg.1 | TC0600007376.hg.1 | uc063mkd.1                     | AL049822.1    | NA       | 82.14 | 7.39 E-09 | 8.13 11 | 3.43 E-08 | P10 - ctrl; P11 - ctrl; ctrl - P2; P8 - ctrl; P10 - P11; P10 - P2; P10 - P3; P11 - P2; P11 - P3; P8 - P11; P3 - P2; P8 - P2; P8 - P3                      |
| TC0600008310.hg.1 | TC0600008310.hg.1 | NM_014464                      | TINAG         | 27283    | 82.08 | 7.42 E-09 | 8.12 94 | 3.44 E-08 | ctrl - P10; P11 - ctrl; ctrl - P2; P3 - ctrl; ctrl - P8; P11 - P10; P2 - P10; P3 - P10; P11 - P2; P3 - P11; P11 - P8; P3 - P2; P2 - P8; P3 - P8           |
| TC0400006956.hg.1 | TC0400006956.hg.1 | NA                             | NA            | NA       | 82.03 | 7.45 E-09 | 8.12 76 | 3.44 E-08 | P10 - ctrl; P3 - ctrl; P8 - ctrl; P10 - P11; P10 - P2; P10 - P3; P3 - P11; P8 - P11; P3 - P2; P8 - P2; P8 - P3                                            |
| TC0600007374.hg.1 | TC0600007374.hg.1 | NM_003509                      | HIST1H2AI     | 8329     | 81.45 | 7.76 E-09 | 8.11    | 3.57 E-08 | P10 - ctrl; ctrl - P2; P3 - ctrl; P8 - ctrl; P10 - P11; P10 - P2; P10 - P3; P11 - P2; P3 - P11; P8 - P11; P3 - P2; P8 - P2; P8 - P3                       |
| TC0300007056.hg.1 | TC0300007056.hg.1 | jeefarbo.aAug10-<br>unspliced  | jeefarbo      | NA       | 81.45 | 7.77 E-09 | 8.10 98 | 3.57 E-08 | ctrl - P10; ctrl - P11; P2 - ctrl; ctrl - P3; ctrl - P8; P11 - P10; P2 - P10; P3 - P10; P10 - P8; P2 - P11; P11 - P3; P11 - P8; P2 - P3; P2 - P8; P3 - P8 |
| TC0100010713.hg.1 | TC0100010713.hg.1 | NM_020318                      | PAPPA2        | 60676    | 81.17 | 7.92 E-09 | 8.10 12 | 3.64 E-08 | ctrl - P10; P11 - ctrl; ctrl - P2; ctrl - P8; P11 - P10; P3 - P10; P11 - P2; P11 - P3; P11 - P8; P3 - P2; P3 - P8                                         |
| TC1700009064.hg.1 | TC1700009064.hg.1 | ENST00000587434.1              | RP11-323N12.5 |          | 81.02 | 8.00 E-09 | 8.09 67 | 3.67 E-08 | P10 - ctrl; P11 - ctrl; P3 - ctrl; P8 - ctrl; P10 - P2; P10 - P3; P10 - P8; P11 - P2; P11 - P3; P11 - P8; P3 - P2; P8 - P2                                |
| TC0X00010851.hg.1 | TC0X00010851.hg.1 | NM_001164617                   | GPC3          | 2719     | 80.87 | 8.10 E-09 | 8.09 18 | 3.71 E-08 | ctrl - P10; ctrl - P11; ctrl - P2; ctrl - P3; ctrl - P8; P11 - P10; P2 - P10; P11 - P3; P11 - P8; P2 - P3; P2 - P8                                        |
| TC1400009186.hg.1 | TC1400009186.hg.1 | NM_014584                      | ERO1A         | 30001    | 80.54 | 8.29 E-09 | 8.08 15 | 3.79 E-08 | P10 - ctrl; P11 - ctrl; ctrl - P2; P3 - ctrl; P8 - ctrl; P10 - P11; P10 - P2; P10 - P3; P11 - P2; P8 - P11; P3 - P2; P8 - P2; P8 - P3                     |
| TC0300008284.hg.1 | TC0300008284.hg.1 | NM_001282556                   | HHLA2         | 11148    | 80.48 | 8.32 E-09 | 8.07 98 | 3.80 E-08 | P10 - ctrl; P11 - ctrl; P8 - ctrl; P10 - P11; P10 - P2; P10 - P3; P10 - P8; P11 - P2; P11 - P3; P8 - P11; P8 - P2; P8 - P3                                |
| TC0700008183.hg.1 | TC0700008183.hg.1 | zysheeby.aAug10-<br>unspliced  | zysheeby      | NA       | 80.25 | 8.46 E-09 | 8.07 25 | 3.85 E-08 | ctrl - P10; ctrl - P11; P2 - ctrl; ctrl - P3; ctrl - P8; P11 - P10; P2 - P10; P3 - P10; P2 - P11; P11 - P8; P2 - P3; P2 - P8; P3 - P8                     |
| TC0500007697.hg.1 | TC0500007697.hg.1 | ENST00000505516                | RP11-589F5.4  | NA       | 79.99 | 8.62 E-09 | 8.06 44 | 3.92 E-08 | ctrl - P10; ctrl - P11; ctrl - P3; ctrl - P8; P11 - P10; P2 - P10; P3 - P10; P2 - P11; P11 - P3; P11 - P8; P2 - P3; P2 - P8; P3 - P8                      |
| TC1900010596.hg.1 | TC1900010596.hg.1 | NA                             | NA            | NA       | 79.78 | 8.75 E-09 | 8.05 78 | 3.97 E-08 | P10 - ctrl; P11 - ctrl; P3 - ctrl; P8 - ctrl; P10 - P11; P10 - P2; P10 - P3; P11 - P2; P8 - P11; P3 - P2; P8 - P2; P8 - P3                                |
| TC0700007000.hg.1 | TC0700007000.hg.1 | NR_038366                      | HOTAIRM1      | 1.01E+08 | 79.64 | 8.84 E-09 | 8.05 34 | 4.00 E-08 | ctrl - P10; ctrl - P11; ctrl - P2; ctrl - P3; ctrl - P8; P11 - P10; P2 - P10; P11 - P3; P11 - P8; P2 - P3; P2 - P8; P8 - P3                               |
| TC0600014192.hg.1 | TC0600014192.hg.1 | ENST00000427015.1              | RP11-307P5.1  |          | 79.56 | 8.89 E-09 | 8.05 09 | 4.02 E-08 | P10 - ctrl; P2 - ctrl; P3 - ctrl; P8 - ctrl; P10 - P11; P2 - P10; P10 - P8; P2 - P11; P3 - P11; P8 - P11; P2 - P3; P2 - P8                                |
| TC0100010155.hg.1 | TC0100010155.hg.1 | NM_001193300                   | SEMA4A        | 64218    | 79.42 | 8.99 E-09 | 8.04 64 | 4.05 E-08 | ctrl - P10; ctrl - P2; ctrl - P3; ctrl - P8; P11 - P10; P2 - P10; P3 - P10; P11 - P2; P11 - P3; P11 - P8; P2 - P8; P3 - P8                                |
| TC0600013326.hg.1 | TC0600013326.hg.1 | NM_022121                      | PERP          | 64065    | 79.01 | 9.26 E-09 | 8.03 34 | 4.17 E-08 | P10 - ctrl; P3 - ctrl; P8 - ctrl; P10 - P11; P10 - P2; P3 - P11; P8 - P11; P3 - P2; P8 - P2                                                               |
| TC1200010538.hg.1 | TC1200010538.hg.1 | NM_001143668                   | AMIGO2        | 347902   | 78.76 | 9.43 E-09 | 8.02 55 | 4.23 E-08 | P10 - ctrl; P3 - ctrl; P8 - ctrl; P10 - P11; P10 - P2; P10 - P3; P3 - P11; P8 - P11; P3 - P2; P8 - P2; P8 - P3                                            |

|                             |                             |                               |               |              |                |              |            |              |                                                                                                                                                  |
|-----------------------------|-----------------------------|-------------------------------|---------------|--------------|----------------|--------------|------------|--------------|--------------------------------------------------------------------------------------------------------------------------------------------------|
| TSUnmapped00000<br>246.hg.1 | TSUnmapped00000<br>246.hg.1 | ENST000000627452              | CCDC84        | 338657       | 78.<br>76<br>4 | 9.43<br>E-09 | 8.02<br>54 | 4.23<br>E-08 | ctrl - P10; ctrl - P11; ctrl - P3; ctrl - P8; P2 - P10; P3 - P10; P2 - P11; P3 - P11; P11 - P8; P2 - P3; P2 - P8; P3 - P8                        |
| TC1100009187.hg.<br>1       | TC1100009187.hg.1           | ENST00000525260.<br>1         | RP11-728F11.4 |              | 78.<br>70<br>5 | 9.47<br>E-09 | 8.02<br>35 | 4.24<br>E-08 | ctrl - P10; ctrl - P2; ctrl - P3; ctrl - P8; P11 - P10; P10 - P2; P10 - P3; P10 - P8; P11 - P2; P11 - P3; P11 - P8; P2 - P3; P8 - P2; P8 - P3    |
| TC1600009921.hg.<br>1       | TC1600009921.hg.1           | barseybo.aAug10-<br>unspliced | barseybo      | NA           | 78.<br>64<br>1 | 9.52<br>E-09 | 8.02<br>15 | 4.25<br>E-08 | ctrl - P10; ctrl - P11; P2 - ctrl; ctrl - P3; ctrl - P8; P11 - P10; P2 - P10; P3 - P10; P10 - P8; P2 - P11; P11 - P8; P2 - P3; P2 - P8; P3 - P8  |
| TC0200013750.hg.<br>1       | TC0200013750.hg.1           | NM_001039492                  | FHL2          | 2274         | 78.<br>60<br>1 | 9.55<br>E-09 | 8.02<br>02 | 4.26<br>E-08 | P10 - ctrl; P11 - ctrl; ctrl - P2; P3 - ctrl; P8 - ctrl; P10 - P11; P10 - P2; P11 - P2; P3 - P11; P8 - P11; P3 - P2; P8 - P2                     |
| TC0400007750.hg.<br>1       | TC0400007750.hg.1           | wadabo.aAug10-<br>unspliced   | wadabo        | NA           | 78.<br>41<br>1 | 9.68<br>E-09 | 8.01<br>41 | 4.31<br>E-08 | ctrl - P10; ctrl - P11; P2 - ctrl; ctrl - P8; P11 - P10; P2 - P10; P3 - P10; P2 - P11; P3 - P11; P11 - P8; P2 - P3; P2 - P8; P3 - P8             |
| TC0700010671.hg.<br>1       | TC0700010671.hg.1           | NM_001191056                  | PDE1C         | 5137         | 78.<br>24<br>1 | 9.80<br>E-09 | 8.00<br>87 | 4.36<br>E-08 | P10 - ctrl; ctrl - P11; ctrl - P2; P3 - ctrl; P8 - ctrl; P10 - P11; P10 - P2; P2 - P11; P3 - P11; P8 - P11; P3 - P2; P8 - P2                     |
| TC0X00007053.hg.<br>1       | TC0X00007053.hg.            | NM_000240                     | MAOA          | 4128         | 78.<br>17<br>1 | 9.85<br>E-09 | 8.00<br>64 | 4.37<br>E-08 | ctrl - P10; ctrl - P2; ctrl - P3; ctrl - P8; P11 - P10; P2 - P10; P3 - P10; P8 - P10; P11 - P2; P11 - P3; P11 - P8; P2 - P3; P2 - P8; P3 - P8    |
| TC0X00009044.hg.<br>1       | TC0X00009044.hg.<br>1       | NM_000273                     | GPR143        | 4935         | 78.<br>11<br>2 | 9.90<br>E-09 | 8.00<br>45 | 4.38<br>E-08 | P10 - ctrl; ctrl - P11; ctrl - P2; ctrl - P3; P8 - ctrl; P10 - P11; P10 - P2; P10 - P3; P2 - P11; P8 - P11; P8 - P2; P8 - P3                     |
| TC1600007204.hg.<br>1       | TC1600007204.hg.1           | wospar.aAug10-<br>unspliced   | wospar        | NA           | 77.<br>71<br>4 | 1.02<br>E-08 | 7.99<br>17 | 4.51<br>E-08 | ctrl - P10; ctrl - P11; ctrl - P3; ctrl - P8; P11 - P10; P2 - P10; P3 - P10; P10 - P8; P2 - P11; P11 - P8; P2 - P3; P2 - P8; P3 - P8             |
| TC0300009855.hg.<br>1       | TC0300009855.hg.1           | NM_001167928                  | IL1RAP        | 3556         | 76.<br>94<br>3 | 1.08<br>E-08 | 7.96<br>67 | 4.77<br>E-08 | P10 - ctrl; ctrl - P2; P3 - ctrl; P8 - ctrl; P10 - P11; P10 - P2; P10 - P3; P11 - P2; P3 - P11; P8 - P11; P3 - P2; P8 - P2; P8 - P3              |
| TC0100015830.hg.<br>1       | TC0100015830.hg.1           | NM_002016                     | FLG           | 2312         | 76.<br>91<br>1 | 1.08<br>E-08 | 7.96<br>56 | 4.77<br>E-08 | P2 - ctrl; P3 - ctrl; P8 - ctrl; P2 - P10; P3 - P10; P8 - P10; P2 - P11; P3 - P11; P8 - P11; P3 - P2; P8 - P2; P3 - P8                           |
| TC0600009362.hg.<br>1       | TC0600009362.hg.1           | NM_012259                     | HEY2          | 23493        | 76.<br>84<br>5 | 1.09<br>E-08 | 7.96<br>35 | 4.79<br>E-08 | ctrl - P10; P11 - ctrl; ctrl - P2; ctrl - P3; ctrl - P8; P11 - P10; P11 - P2; P11 - P3; P11 - P8                                                 |
| TC0900007457.hg.<br>1       | TC0900007457.hg.1           | NR_111893                     | CNTNAP3P2     | 643827       | 76.<br>77<br>4 | 1.09<br>E-08 | 7.96<br>11 | 4.80<br>E-08 | ctrl - P10; P2 - ctrl; ctrl - P8; P11 - P10; P2 - P10; P3 - P10; P2 - P11; P3 - P11; P11 - P8; P2 - P3; P2 - P8; P3 - P8                         |
| TC0800006669.hg.<br>1       | TC0800006669.hg.1           | NR_125431                     | LOC101929128  | 1.02E+<br>08 | 76.<br>65<br>4 | 1.10<br>E-08 | 7.95<br>72 | 4.83<br>E-08 | P10 - ctrl; ctrl - P11; P3 - ctrl; P8 - ctrl; P10 - P11; P10 - P2; P10 - P3; P8 - P10; P2 - P11; P3 - P11; P8 - P11; P3 - P2; P8 - P2; P8 - P3   |
| TC1800007986.hg.<br>1       | TC1800007986.hg.1           | NM_005559                     | LAMA1         | 284217       | 76.<br>65<br>3 | 1.10<br>E-08 | 7.95<br>72 | 4.83<br>E-08 | ctrl - P10; ctrl - P2; ctrl - P3; ctrl - P8; P11 - P10; P2 - P10; P3 - P10; P11 - P2; P11 - P3; P11 - P8; P2 - P3; P2 - P8; P3 - P8              |
| TC0200014705.hg.<br>1       | TC0200014705.hg.1           | jagarbo.aAug10-<br>unspliced  | jagarbo       | NA           | 76.<br>59<br>1 | 1.11<br>E-08 | 7.95<br>51 | 4.83<br>E-08 | ctrl - P10; ctrl - P11; ctrl - P3; ctrl - P8; P11 - P10; P2 - P10; P3 - P10; P2 - P11; P11 - P8; P2 - P3; P2 - P8; P3 - P8                       |
| TC1400010071.hg.<br>1       | TC1400010071.hg.1           | NM_024734                     | CLMN          | 79789        | 76.<br>57<br>1 | 1.11<br>E-08 | 7.95<br>45 | 4.83<br>E-08 | ctrl - P10; ctrl - P2; ctrl - P3; ctrl - P8; P11 - P10; P2 - P10; P3 - P10; P8 - P10; P11 - P2; P11 - P3; P11 - P8; P2 - P8; P3 - P8             |
| TC0900009880.hg.<br>1       | TC0900009880.hg.1           | vysooby.aAug10-<br>unspliced  | vysooby       | NA           | 76.<br>57<br>1 | 1.11<br>E-08 | 7.95<br>45 | 4.83<br>E-08 | ctrl - P10; ctrl - P11; ctrl - P3; ctrl - P8; P2 - P10; P3 - P10; P10 - P8; P2 - P11; P3 - P11; P11 - P8; P2 - P3; P2 - P8; P3 - P8              |
| TC1100010111.hg.<br>1       | TC1100010111.hg.1           | teygoby.aAug10-<br>unspliced  | teygoby       | NA           | 76.<br>45<br>3 | 1.12<br>E-08 | 7.95<br>06 | 4.87<br>E-08 | ctrl - P10; ctrl - P11; ctrl - P3; ctrl - P8; P11 - P10; P2 - P10; P3 - P10; P11 - P3; P11 - P8; P2 - P3; P2 - P8; P3 - P8                       |
| TC0800010285.hg.<br>1       | TC0800010285.hg.1           | NM_001257180                  | SLC20A2       | 6575         | 76.<br>38<br>8 | 1.13<br>E-08 | 7.94<br>85 | 4.88<br>E-08 | P10 - ctrl; P8 - ctrl; P10 - P11; P10 - P2; P10 - P3; P11 - P3; P8 - P11; P8 - P2; P8 - P3                                                       |
| TC1000008727.hg.<br>1       | TC1000008727.hg.1           | NM_001077494                  | NFKB2         | 10q24        | 76.<br>12<br>1 | 1.15<br>E-08 | 7.93<br>97 | 4.98<br>E-08 | P10 - ctrl; P3 - ctrl; P8 - ctrl; P10 - P11; P10 - P2; P8 - P10; P11 - P2; P3 - P11; P8 - P11; P3 - P2; P8 - P2; P8 - P3                         |
| TC2100006620.hg.<br>1       | TC2100006620.hg.1           | geefly.aAug10-<br>unspliced   | geefly        | NA           | 76.<br>05<br>6 | 1.15<br>E-08 | 7.93<br>76 | 4.99<br>E-08 | ctrl - P10; ctrl - P11; P2 - ctrl; ctrl - P3; ctrl - P8; P11 - P10; P2 - P10; P3 - P10; P2 - P11; P11 - P8; P2 - P3; P2 - P8; P3 - P8            |
| TC1300008092.hg.<br>1       | TC1300008092.hg.1           | OTTHUMT00000474<br>565        | RP11-73M11.3  |              | 75.<br>99<br>2 | 1.16<br>E-08 | 7.93<br>55 | 5.00<br>E-08 | ctrl - P10; ctrl - P11; ctrl - P3; ctrl - P8; P2 - P10; P10 - P8; P2 - P11; P11 - P3; P11 - P8; P2 - P3; P2 - P8; P3 - P8                        |
| TC1600006888.hg.<br>1       | TC1600006888.hg.1           | NM_000246                     | CIITA         | 4261         | 75.<br>98<br>3 | 1.16<br>E-08 | 7.93<br>52 | 5.00<br>E-08 | P10 - ctrl; P8 - ctrl; P10 - P11; P10 - P2; P10 - P3; P8 - P11; P8 - P2; P8 - P3                                                                 |
| TC0100007584.hg.<br>1       | TC0100007584.hg.1           | NM_001195001                  | PTPRU         | 10076        | 75.<br>84<br>7 | 1.17<br>E-08 | 7.93<br>07 | 5.05<br>E-08 | P10 - ctrl; P11 - ctrl; ctrl - P2; P3 - ctrl; P8 - ctrl; P10 - P11; P10 - P2; P3 - P10; P8 - P10; P11 - P2; P3 - P11; P8 - P11; P3 - P2; P8 - P2 |
| TC1200012327.hg.<br>1       | TC1200012327.hg.1           | NM_001082959                  | SCAR81        | 949          | 75.<br>82<br>1 | 1.18<br>E-08 | 7.92<br>98 | 5.05<br>E-08 | P10 - ctrl; P3 - ctrl; P8 - ctrl; P10 - P11; P10 - P2; P10 - P3; P3 - P11; P8 - P11; P3 - P2; P8 - P2; P8 - P3                                   |
| TC1000009025.hg.<br>1       | TC1000009025.hg.1           | NM_001165924                  | EMX2          | 2018         | 75.<br>64<br>1 | 1.19<br>E-08 | 7.92<br>38 | 5.11<br>E-08 | ctrl - P10; ctrl - P3; ctrl - P8; P11 - P10; P2 - P10; P3 - P10; P10 - P8; P11 - P3; P11 - P8; P2 - P3; P2 - P8; P3 - P8                         |
| TC1100007692.hg.<br>1       | TC1100007692.hg.1           | glyny.aAug10-<br>unspliced    | glyny         | NA           | 75.<br>45<br>4 | 1.21<br>E-08 | 7.91<br>76 | 5.17<br>E-08 | ctrl - P10; ctrl - P11; P2 - ctrl; ctrl - P3; ctrl - P8; P2 - P10; P3 - P10; P2 - P11; P3 - P11; P11 - P8; P2 - P3; P2 - P8; P3 - P8             |
| TC1200010182.hg.<br>1       | TC1200010182.hg.1           | NM_030762                     | BHLHE41       | 79365        | 75.<br>34<br>1 | 1.22<br>E-08 | 7.91<br>4  | 5.21<br>E-08 | P10 - ctrl; P11 - ctrl; P2 - ctrl; P3 - ctrl; P8 - ctrl; P11 - P10; P10 - P2; P3 - P10; P11 - P2; P3 - P11; P11 - P8; P3 - P2; P8 - P2; P3 - P8  |
| TC0200008322.hg.<br>1       | TC0200008322.hg.1           | NA                            | NA            | NA           | 75.<br>15<br>5 | 1.24<br>E-08 | 7.90<br>77 | 5.27<br>E-08 | ctrl - P10; ctrl - P11; ctrl - P3; ctrl - P8; P11 - P10; P2 - P10; P3 - P10; P2 - P11; P11 - P3; P11 - P8; P2 - P3; P2 - P8; P3 - P8             |
| TC0300006580.hg.<br>1       | TC0300006580.hg.1           | NM_001570                     | IRAK2         | 3656         | 75.<br>09<br>4 | 1.24<br>E-08 | 7.90<br>56 | 5.29<br>E-08 | P10 - ctrl; P11 - ctrl; P3 - ctrl; P8 - ctrl; P10 - P11; P10 - P2; P3 - P10; P8 - P10; P11 - P2; P3 - P11; P8 - P11; P3 - P2; P8 - P2            |
| TC0100015710.hg.<br>1       | TC0100015710.hg.1           | uc057klw.1                    | AC239868.1    | NA           | 75.<br>07<br>4 | 1.24<br>E-08 | 7.90<br>5  | 5.29<br>E-08 | P10 - ctrl; P11 - ctrl; P3 - ctrl; P8 - ctrl; P10 - P11; P10 - P2; P10 - P3; P10 - P8; P11 - P2; P11 - P3; P8 - P11; P3 - P2; P8 - P2; P8 - P3   |
| TC0800006869.hg.<br>1       | TC0800006869.hg.1           | NM_001008539                  | SLC7A2        | 6542         | 75.<br>05<br>6 | 1.25<br>E-08 | 7.90<br>44 | 5.29<br>E-08 | P10 - ctrl; P11 - ctrl; P2 - ctrl; P8 - ctrl; P10 - P11; P10 - P2; P10 - P3; P10 - P8; P11 - P3; P8 - P11; P8 - P2; P8 - P3                      |
| TC0600013203.hg.<br>1       | TC0600013203.hg.1           | NM_004666                     | VNN1          | 8876         | 74.<br>93<br>6 | 1.26<br>E-08 | 7.90<br>03 | 5.33<br>E-08 | P10 - ctrl; P3 - ctrl; P8 - ctrl; P10 - P11; P10 - P2; P8 - P10; P3 - P11; P8 - P11; P3 - P2; P8 - P2; P8 - P3                                   |

|                   |                   |                                           |                                    |         |            |              |            |              |                                                                                                                                                  |
|-------------------|-------------------|-------------------------------------------|------------------------------------|---------|------------|--------------|------------|--------------|--------------------------------------------------------------------------------------------------------------------------------------------------|
| TC0700006629.hg.1 | TC0700006629.hg.1 | NM_003088                                 | FSCN1                              | 6624    | 74.75<br>6 | 1.28<br>E-08 | 7.89<br>43 | 5.39<br>E-08 | P10 - ctrl; ctrl - P11; ctrl - P2; P3 - ctrl; P8 - ctrl; P10 - P11; P10 - P2; P3 - P10; P8 - P10; P3 - P11; P8 - P11; P3 - P2; P8 - P2           |
| TC1700011097.hg.1 | TC1700011097.hg.1 | NM_018509                                 | LRRC59                             | 55379   | 74.72<br>3 | 1.28<br>E-08 | 7.89<br>32 | 5.40<br>E-08 | P10 - ctrl; ctrl - P2; P3 - ctrl; P8 - ctrl; P10 - P11; P10 - P2; P10 - P3; P11 - P2; P3 - P11; P8 - P11; P3 - P2; P8 - P2; P8 - P3              |
| TC1100010207.hg.1 | TC1100010207.hg.1 | NM_001145811                              | SOX6                               | 55553   | 74.59<br>5 | 1.29<br>E-08 | 7.88<br>87 | 5.44<br>E-08 | ctrl - P10; ctrl - P3; ctrl - P8; P11 - P10; P2 - P10; P3 - P10; P10 - P8; P11 - P3; P11 - P8; P2 - P3; P2 - P8; P3 - P8                         |
| TC0100009723.hg.1 | TC0100009723.hg.1 | NM_207418                                 | FAM72D                             | 728833  | 74.48<br>3 | 1.30<br>E-08 | 7.88<br>51 | 5.48<br>E-08 | P10 - ctrl; ctrl - P11; ctrl - P2; P8 - ctrl; P10 - P11; P10 - P2; P10 - P3; P8 - P10; P3 - P11; P8 - P11; P3 - P2; P8 - P2; P8 - P3             |
| TC1800006448.hg.1 | TC1800006448.hg.1 | NM_001071                                 | TYM5                               | 7298    | 74.38<br>7 | 1.31<br>E-08 | 7.88<br>19 | 5.51<br>E-08 | P10 - ctrl; ctrl - P11; ctrl - P2; P3 - ctrl; P8 - ctrl; P10 - P11; P10 - P2; P8 - P10; P3 - P11; P8 - P11; P3 - P2; P8 - P2; P8 - P3            |
| TC0800011589.hg.1 | TC0800011589.hg.1 | snierla.aAug10-<br>unspliced              | snierla                            | NA      | 74.22<br>2 | 1.33<br>E-08 | 7.87<br>63 | 5.57<br>E-08 | ctrl - P10; ctrl - P11; P2 - ctrl; ctrl - P8; P10 - P11; P2 - P10; P3 - P10; P10 - P8; P2 - P11; P3 - P11; P2 - P3; P2 - P8; P3 - P8             |
| TC0700008050.hg.1 | TC0700008050.hg.1 | STAG3L1andTRIM7<br>andNSUN5P1.voAug<br>10 | STAG3L1andTRI<br>M73andNSUN5<br>P1 | NA      | 74.20<br>4 | 1.33<br>E-08 | 7.87<br>57 | 5.57<br>E-08 | ctrl - P10; ctrl - P11; ctrl - P3; ctrl - P8; P11 - P10; P2 - P10; P3 - P10; P2 - P11; P11 - P8; P2 - P3; P2 - P8; P3 - P8                       |
| TC0600011669.hg.1 | TC0600011669.hg.1 | skarglubyaAug10-<br>unspliced             | skarglubya                         | NA      | 74.16<br>1 | 1.34<br>E-08 | 7.87<br>43 | 5.58<br>E-08 | P10 - ctrl; P11 - ctrl; P3 - ctrl; P8 - ctrl; P10 - P2; P10 - P3; P11 - P2; P11 - P3; P3 - P2; P8 - P2; P8 - P3                                  |
| TC0500013322.hg.1 | TC0500013322.hg.1 | NM_022892                                 | NAIP                               | 4671    | 74.08<br>9 | 1.34<br>E-08 | 7.87<br>19 | 5.60<br>E-08 | ctrl - P10; ctrl - P11; P2 - ctrl; ctrl - P3; ctrl - P8; P11 - P10; P2 - P10; P3 - P10; P2 - P11; P11 - P8; P2 - P3; P2 - P8; P3 - P8            |
| TC0100017420.hg.1 | TC0100017420.hg.1 | NM_007207                                 | DUSP10                             | 11221   | 73.92<br>6 | 1.36<br>E-08 | 7.86<br>63 | 5.67<br>E-08 | P10 - ctrl; P3 - ctrl; P8 - ctrl; P10 - P11; P10 - P2; P8 - P10; P3 - P11; P8 - P11; P3 - P2; P8 - P2; P8 - P3                                   |
| TC1600007170.hg.1 | TC1600007170.hg.1 | ENST00000564271.<br>1                     | CTB-31N19.3                        | NA      | 73.80<br>1 | 1.37<br>E-08 | 7.86<br>21 | 5.71<br>E-08 | ctrl - P10; ctrl - P11; ctrl - P3; ctrl - P8; P11 - P10; P2 - P10; P10 - P8; P2 - P11; P11 - P3; P11 - P8; P2 - P3; P2 - P8; P3 - P8             |
| TC0400010786.hg.1 | TC0400010786.hg.1 | peegaw.aAug10-<br>unspliced               | peegaw                             | NA      | 73.72<br>2 | 1.38<br>E-08 | 7.85<br>94 | 5.73<br>E-08 | ctrl - P10; ctrl - P11; P2 - ctrl; ctrl - P8; P2 - P10; P3 - P10; P10 - P8; P2 - P11; P3 - P11; P11 - P8; P2 - P3; P2 - P8; P3 - P8              |
| TC0500012531.hg.1 | TC0500012531.hg.1 | NM_020167                                 | NMUR2                              | 56923   | 73.72<br>2 | 1.38<br>E-08 | 7.85<br>94 | 5.73<br>E-08 | P10 - ctrl; P3 - ctrl; P8 - ctrl; P10 - P11; P10 - P2; P8 - P10; P3 - P11; P8 - P11; P3 - P2; P8 - P2; P8 - P3                                   |
| TC0400006930.hg.1 | TC0400006930.hg.1 | NM_001177381                              | CPEB2                              | 132864  | 73.59<br>9 | 1.40<br>E-08 | 7.85<br>52 | 5.77<br>E-08 | ctrl - P10; ctrl - P3; ctrl - P8; P11 - P10; P2 - P10; P3 - P10; P11 - P3; P11 - P8; P2 - P3; P2 - P8; P3 - P8                                   |
| TC0600009866.hg.1 | TC0600009866.hg.1 | NA                                        | NA                                 | NA      | 73.41<br>3 | 1.42<br>E-08 | 7.84<br>89 | 5.85<br>E-08 | ctrl - P10; ctrl - P11; ctrl - P3; ctrl - P8; P11 - P10; P2 - P10; P3 - P10; P2 - P11; P11 - P8; P2 - P3; P2 - P8; P3 - P8                       |
| TC1700011566.hg.1 | TC1700011566.hg.1 | NM_001243746                              | FAM20A                             | 54757   | 73.05<br>7 | 1.46<br>E-08 | 7.83<br>67 | 6.01<br>E-08 | P10 - ctrl; P11 - ctrl; P3 - ctrl; P8 - ctrl; P10 - P11; P10 - P2; P10 - P3; P10 - P8; P8 - P11; P8 - P2; P8 - P3                                |
| TC0500013324.hg.1 | TC0500013324.hg.1 | NR_033968_7                               | GUSBP9                             | NA      | 72.97<br>2 | 1.47<br>E-08 | 7.83<br>38 | 6.04<br>E-08 | ctrl - P10; ctrl - P11; ctrl - P3; ctrl - P8; P11 - P10; P2 - P10; P3 - P10; P10 - P8; P2 - P11; P11 - P8; P2 - P3; P2 - P8; P3 - P8             |
| TC1700011892.hg.1 | TC1700011892.hg.1 | NM_003258                                 | TK1                                | 7083    | 72.90<br>7 | 1.47<br>E-08 | 7.83<br>16 | 6.06<br>E-08 | P10 - ctrl; ctrl - P11; ctrl - P2; P3 - ctrl; P8 - ctrl; P10 - P11; P10 - P2; P10 - P3; P8 - P10; P3 - P11; P8 - P11; P3 - P2; P8 - P2; P8 - P3  |
| TC2000006444.hg.1 | TC2000006444.hg.1 | NM_001301188                              | TRIB3                              | 57761   | 72.67<br>6 | 1.50<br>E-08 | 7.82<br>36 | 6.16<br>E-08 | P10 - ctrl; P11 - ctrl; ctrl - P2; P3 - ctrl; P8 - ctrl; P11 - P10; P10 - P2; P10 - P3; P11 - P2; P11 - P3; P3 - P2; P8 - P2; P8 - P3            |
| TC0600010781.hg.1 | TC0600010781.hg.1 | ENST00000431401.<br>1                     | RP1-290I0.5                        | NA      | 72.52<br>4 | 1.52<br>E-08 | 7.81<br>84 | 6.22<br>E-08 | P10 - ctrl; P3 - ctrl; P8 - ctrl; P10 - P11; P10 - P2; P8 - P10; P3 - P11; P8 - P11; P3 - P2; P8 - P2; P8 - P3                                   |
| TC0800010704.hg.1 | TC0800010704.hg.1 | wargey.aAug10-<br>unspliced               | wargey                             | NA      | 72.51<br>3 | 1.52<br>E-08 | 7.81<br>8  | 6.22<br>E-08 | ctrl - P10; ctrl - P11; P2 - ctrl; ctrl - P8; P2 - P10; P3 - P10; P10 - P8; P2 - P11; P3 - P11; P11 - P8; P2 - P3; P2 - P8; P3 - P8              |
| TC1300008668.hg.1 | TC1300008668.hg.1 | NM_005780                                 | LHFP                               | 10186   | 72.22<br>8 | 1.56<br>E-08 | 7.80<br>81 | 6.35<br>E-08 | ctrl - P10; ctrl - P11; ctrl - P2; P3 - ctrl; P11 - P10; P3 - P10; P8 - P10; P11 - P2; P3 - P11; P8 - P11; P3 - P2; P8 - P2; P3 - P8             |
| TC0200009219.hg.1 | TC0200009219.hg.1 | NM_001080527                              | MYO7B                              | 4648    | 72.14<br>3 | 1.57<br>E-08 | 7.80<br>52 | 6.38<br>E-08 | ctrl - P10; P11 - ctrl; ctrl - P2; ctrl - P3; ctrl - P8; P11 - P10; P10 - P3; P10 - P8; P11 - P2; P11 - P3; P11 - P8; P2 - P3; P2 - P8; P8 - P3  |
| TC0500011146.hg.1 | TC0500011146.hg.1 | NM_001256574                              | ENC1                               | 8507    | 71.89<br>6 | 1.60<br>E-08 | 7.79<br>66 | 6.50<br>E-08 | P10 - ctrl; ctrl - P2; P3 - ctrl; P8 - ctrl; P10 - P11; P10 - P2; P3 - P10; P8 - P10; P11 - P2; P3 - P11; P8 - P11; P3 - P2; P8 - P2             |
| TC0X00011355.hg.1 | TC0X00011355.hg.1 | NM_001018109                              | PIR                                | 8544    | 71.75<br>8 | 1.62<br>E-08 | 7.79<br>18 | 6.56<br>E-08 | P10 - ctrl; P11 - ctrl; P3 - ctrl; P8 - ctrl; P10 - P11; P10 - P2; P11 - P2; P3 - P11; P8 - P11; P3 - P2; P8 - P2                                |
| TC1500006582.hg.1 | TC1500006582.hg.1 | NR_003296                                 | SNORD115-4                         | 15q11.2 | 71.65<br>8 | 1.63<br>E-08 | 7.78<br>83 | 6.61<br>E-08 | P10 - ctrl; P11 - ctrl; P2 - ctrl; P3 - ctrl; P8 - ctrl; P10 - P11; P10 - P2; P3 - P10; P3 - P11; P8 - P11; P3 - P2; P8 - P2; P3 - P8            |
| TC0800008511.hg.1 | TC0800008511.hg.1 | floydarby.aAug10-<br>unspliced            | floydarby                          | NA      | 71.63<br>2 | 1.63<br>E-08 | 7.78<br>74 | 6.61<br>E-08 | ctrl - P10; ctrl - P11; P2 - ctrl; ctrl - P3; ctrl - P8; P11 - P10; P2 - P10; P3 - P10; P2 - P11; P3 - P11; P11 - P8; P2 - P3; P2 - P8; P3 - P8  |
| TC1700008069.hg.1 | TC1700008069.hg.1 | ENST00000586348.<br>1                     | RP11-798G7.6                       | NA      | 71.57<br>6 | 1.64<br>E-08 | 7.78<br>54 | 6.63<br>E-08 | ctrl - P10; ctrl - P11; P2 - ctrl; ctrl - P3; ctrl - P8; P11 - P10; P2 - P10; P2 - P11; P11 - P3; P11 - P8; P2 - P3; P2 - P8                     |
| TC1400008615.hg.1 | TC1400008615.hg.1 | NM_001282211                              | NDRG2                              | 57447   | 71.35<br>2 | 1.67<br>E-08 | 7.77<br>76 | 6.73<br>E-08 | ctrl - P10; P11 - ctrl; ctrl - P2; ctrl - P3; ctrl - P8; P11 - P10; P2 - P10; P11 - P2; P11 - P3; P11 - P8; P2 - P8                              |
| TC1100009817.hg.1 | TC1100009817.hg.1 | NM_003311                                 | PHLDA2                             | 7262    | 71.34<br>5 | 1.67<br>E-08 | 7.77<br>73 | 6.73<br>E-08 | P10 - ctrl; P11 - ctrl; ctrl - P2; P3 - ctrl; P8 - ctrl; P10 - P11; P10 - P2; P3 - P10; P8 - P10; P11 - P2; P3 - P11; P8 - P11; P3 - P2; P8 - P2 |
| TC1400008054.hg.1 | TC1400008054.hg.1 | NM_023112                                 | OTUB2                              | 78990   | 71.27<br>7 | 1.68<br>E-08 | 7.77<br>47 | 6.76<br>E-08 | P10 - ctrl; ctrl - P11; ctrl - P2; P3 - ctrl; P8 - ctrl; P10 - P11; P10 - P2; P3 - P10; P8 - P10; P3 - P11; P8 - P11; P3 - P2; P8 - P2; P3 - P8  |
| TC1700009679.hg.1 | TC1700009679.hg.1 | NM_001256834                              | AURKB                              | 9212    | 71.18<br>8 | 1.69<br>E-08 | 7.77<br>18 | 6.79<br>E-08 | P10 - ctrl; ctrl - P11; ctrl - P2; P8 - ctrl; P10 - P11; P10 - P2; P10 - P3; P8 - P10; P3 - P11; P8 - P11; P3 - P2; P8 - P2; P8 - P3             |
| TC0900011708.hg.1 | TC0900011708.hg.1 | NM_004878                                 | PTGES                              | 9536    | 71.15<br>9 | 1.70<br>E-08 | 7.77<br>08 | 6.80<br>E-08 | P10 - ctrl; ctrl - P11; ctrl - P2; P3 - ctrl; P8 - ctrl; P10 - P11; P10 - P2; P10 - P3; P3 - P11; P8 - P11; P3 - P2; P8 - P2; P8 - P3            |

|                   |                   |                               |               |          |       |      |      |      |                                                                                                                                                           |
|-------------------|-------------------|-------------------------------|---------------|----------|-------|------|------|------|-----------------------------------------------------------------------------------------------------------------------------------------------------------|
| TC0100011512.hg.1 | TC0100011512.hg.1 | NM_001286229                  | DTL           | 51514    | 71.05 | 1.71 | 7.76 | 6.85 | P10 - ctrl; ctrl - P11; ctrl - P2; P3 - ctrl; P8 - ctrl; P10 - P11; P10 - P2; P3 - P10; P8 - P10; P2 - P11; P3 - P11; P8 - P11; P3 - P2; P8 - P2          |
| TC0200014797.hg.1 | TC0200014797.hg.1 | chudey.aAug10-<br>unspliced   | chudey        | NA       | 70.89 | 1.73 | 7.76 | 6.92 | ctrl - P10; ctrl - P11; ctrl - P3; ctrl - P8; P11 - P10; P2 - P10; P3 - P10; P10 - P8; P2 - P11; P11 - P8; P2 - P3; P2 - P8; P3 - P8                      |
| TC1000009899.hg.1 | TC1000009899.hg.1 | NA                            | NA            | NA       | 70.76 | 1.75 | 7.75 | 6.99 | P10 - ctrl; P3 - ctrl; P8 - ctrl; P10 - P11; P10 - P2; P3 - P10; P3 - P11; P8 - P11; P3 - P2; P8 - P2; P3 - P8                                            |
| TC1300008948.hg.1 | TC1300008948.hg.1 | geypy.aAug10-<br>unspliced    | geypy         | NA       | 70.68 | 1.76 | 7.75 | 7.02 | ctrl - P10; ctrl - P11; P2 - ctrl; ctrl - P3; ctrl - P8; P11 - P10; P2 - P10; P3 - P10; P2 - P11; P11 - P8; P2 - P3; P2 - P8; P3 - P8                     |
| TC1800008900.hg.1 | TC1800008900.hg.1 | mokori.aAug10-<br>unspliced   | mokori        | NA       | 70.61 | 1.77 | 7.75 | 7.05 | ctrl - P10; ctrl - P11; P2 - ctrl; ctrl - P3; ctrl - P8; P2 - P10; P10 - P8; P2 - P11; P11 - P8; P2 - P3; P2 - P8; P3 - P8                                |
| TC0100018291.hg.1 | TC0100018291.hg.1 | NR_103778                     | FLG-AS1       | 339400   | 70.38 | 1.80 | 7.74 | 7.17 | ctrl - P10; ctrl - P11; P3 - ctrl; ctrl - P8; P2 - P10; P3 - P10; P8 - P10; P2 - P11; P3 - P11; P8 - P11; P3 - P2; P2 - P8; P3 - P8                       |
| TC0300007273.hg.1 | TC0300007273.hg.1 | NM_000316                     | PTH1R         | 5745     | 70.36 | 1.81 | 7.74 | 7.17 | ctrl - P10; ctrl - P11; ctrl - P2; ctrl - P3; ctrl - P8; P11 - P10; P11 - P2; P11 - P3; P11 - P8                                                          |
| TC0300009867.hg.1 | TC0300009867.hg.1 | NA                            | NA            | NA       | 70.25 | 1.82 | 7.73 | 7.23 | ctrl - P10; ctrl - P11; ctrl - P2; ctrl - P3; ctrl - P8; P11 - P10; P2 - P10; P3 - P10; P10 - P8; P2 - P11; P11 - P3; P11 - P8; P2 - P3; P2 - P8; P3 - P8 |
| TC0100015509.hg.1 | TC0100015509.hg.1 | NM_001100910                  | FAM72B        | 653820   | 70.20 | 1.83 | 7.73 | 7.25 | P10 - ctrl; ctrl - P11; ctrl - P2; P8 - ctrl; P10 - P11; P10 - P2; P10 - P3; P8 - P10; P3 - P11; P8 - P11; P3 - P2; P8 - P2; P8 - P3                      |
| TC0600012467.hg.1 | TC0600012467.hg.1 | ENST00000455071               | LOC101928820  | 1.02E+08 | 70.15 | 1.84 | 7.73 | 7.26 | P10 - ctrl; P3 - ctrl; P8 - ctrl; P10 - P11; P10 - P2; P3 - P10; P2 - P11; P3 - P11; P8 - P11; P3 - P2; P8 - P2; P3 - P8                                  |
| TC0700010718.hg.1 | TC0700010718.hg.1 | NR_002833                     | DPY19L2P1     | 554236   | 70.10 | 1.85 | 7.73 | 7.28 | ctrl - P10; ctrl - P11; ctrl - P8; P11 - P10; P2 - P10; P3 - P10; P8 - P10; P2 - P11; P3 - P11; P11 - P8; P2 - P8; P3 - P8                                |
| TC1400007120.hg.1 | TC1400007120.hg.1 | NM_001127713                  | ATL1          | 51062    | 70.02 | 1.86 | 7.73 | 7.31 | P10 - ctrl; ctrl - P11; P3 - ctrl; P8 - ctrl; P10 - P11; P10 - P2; P10 - P3; P2 - P11; P3 - P11; P8 - P11; P3 - P2; P8 - P2; P8 - P3                      |
| TC2200006827.hg.1 | TC2200006827.hg.1 | NM_002073                     | GNAZ          | 2781     | 70.02 | 1.86 | 7.73 | 7.31 | ctrl - P10; ctrl - P11; ctrl - P2; ctrl - P3; ctrl - P8; P11 - P10; P2 - P10; P11 - P3; P11 - P8; P2 - P3; P2 - P8                                        |
| TC1200007741.hg.1 | TC1200007741.hg.1 | ENST00000562848.1             | AC012531.25   |          | 70.00 | 1.86 | 7.72 | 7.31 | ctrl - P10; ctrl - P11; ctrl - P3; ctrl - P8; P11 - P10; P2 - P10; P3 - P10; P2 - P11; P11 - P8; P2 - P3; P2 - P8; P3 - P8                                |
| TC0700006923.hg.1 | TC0700006923.hg.1 | ENST00000428259               | AC079780.3    | NA       | 69.93 | 1.87 | 7.72 | 7.34 | ctrl - P10; ctrl - P11; ctrl - P2; ctrl - P3; ctrl - P8; P11 - P10; P2 - P10; P3 - P10; P11 - P2; P11 - P3; P11 - P8; P2 - P8; P3 - P8                    |
| TC0200012159.hg.1 | TC0200012159.hg.1 | NM_144575                     | CAPN13        | 92291    | 69.88 | 1.88 | 7.72 | 7.35 | P10 - ctrl; P8 - ctrl; P10 - P11; P10 - P2; P10 - P3; P10 - P8; P8 - P11; P8 - P2; P8 - P3                                                                |
| TC0200010634.hg.1 | TC0200010634.hg.1 | ENST00000416092               | MEAF6P1       |          | 69.87 | 1.88 | 7.72 | 7.35 | ctrl - P10; ctrl - P3; ctrl - P8; P11 - P10; P2 - P10; P3 - P10; P11 - P3; P11 - P8; P2 - P3; P2 - P8; P3 - P8                                            |
| TC0400010750.hg.1 | TC0400010750.hg.1 | NM_001292045                  | NMU           | 10874    | 69.82 | 1.89 | 7.72 | 7.36 | P10 - ctrl; P3 - ctrl; P8 - ctrl; P10 - P11; P10 - P2; P8 - P10; P3 - P11; P8 - P11; P3 - P2; P8 - P2; P8 - P3                                            |
| TC2000007705.hg.1 | TC2000007705.hg.1 | blovey.aAug10-<br>unspliced   | blovey        | NA       | 69.81 | 1.89 | 7.72 | 7.36 | ctrl - P10; ctrl - P11; ctrl - P3; ctrl - P8; P11 - P10; P2 - P10; P10 - P8; P2 - P11; P11 - P3; P11 - P8; P2 - P3; P2 - P8; P3 - P8                      |
| TC0500007000.hg.1 | TC0500007000.hg.1 | NR_038848                     | LINC01021     | 643401   | 69.80 | 1.89 | 7.72 | 7.36 | P10 - ctrl; P2 - ctrl; P3 - ctrl; P8 - ctrl; P10 - P11; P3 - P10; P2 - P11; P3 - P11; P8 - P11; P3 - P2; P8 - P2; P3 - P8                                 |
| TC0200010411.hg.1 | TC0200010411.hg.1 | rorswaby.aAug10-<br>unspliced | rorswaby      | NA       | 69.78 | 1.90 | 7.72 | 7.36 | ctrl - P10; ctrl - P11; ctrl - P3; ctrl - P8; P11 - P10; P2 - P10; P3 - P10; P2 - P11; P3 - P11; P11 - P8; P2 - P11; P8 - P2; P8 - P3                     |
| TC1900011203.hg.1 | TC1900011203.hg.1 | ENST00000598194.1             | CTD-2545M3.2  |          | 69.63 | 1.92 | 7.71 | 7.44 | ctrl - P10; P11 - ctrl; ctrl - P2; P3 - ctrl; ctrl - P8; P11 - P10; P3 - P10; P8 - P10; P11 - P2; P11 - P3; P11 - P8; P3 - P2; P3 - P8                    |
| TC2000007438.hg.1 | TC2000007438.hg.1 | NM_001278610                  | MYBL2         | 4605     | 69.41 | 1.96 | 7.70 | 7.55 | P10 - ctrl; ctrl - P11; ctrl - P2; P8 - ctrl; P10 - P11; P10 - P2; P10 - P3; P8 - P10; P3 - P11; P8 - P11; P3 - P2; P8 - P2; P8 - P3                      |
| TC1100012318.hg.1 | TC1100012318.hg.1 | NM_001243211                  | IL18          | 3606     | 69.40 | 1.96 | 7.70 | 7.55 | P10 - ctrl; P2 - ctrl; P3 - ctrl; P8 - ctrl; P10 - P11; P10 - P2; P10 - P3; P2 - P11; P3 - P11; P8 - P11; P3 - P2; P8 - P2; P8 - P3                       |
| TC0600008622.hg.1 | TC0600008622.hg.1 | NM_031469                     | SH3BGR12      | 83699    | 69.39 | 1.96 | 7.70 | 7.55 | P10 - ctrl; P3 - ctrl; P8 - ctrl; P10 - P11; P10 - P2; P10 - P3; P3 - P11; P8 - P11; P3 - P2; P8 - P2; P8 - P3                                            |
| TC0100018423.hg.1 | TC0100018423.hg.1 | NR_110616                     | LINC01355     |          | 69.35 | 1.96 | 7.70 | 7.57 | ctrl - P10; ctrl - P11; P2 - ctrl; ctrl - P3; ctrl - P8; P11 - P10; P2 - P10; P3 - P10; P2 - P11; P11 - P3; P11 - P8; P2 - P3; P2 - P8                    |
| TC0100007206.hg.1 | TC0100007206.hg.1 | NM_001785                     | CDA           | 978      | 69.33 | 1.97 | 7.70 | 7.57 | P10 - ctrl; P3 - ctrl; P8 - ctrl; P10 - P11; P10 - P2; P8 - P10; P3 - P11; P8 - P11; P3 - P2; P8 - P2; P8 - P3                                            |
| TC0700011842.hg.1 | TC0700011842.hg.1 | NM_002612                     | PDK4          | 5166     | 69.26 | 1.98 | 7.70 | 7.60 | P10 - ctrl; P2 - ctrl; P3 - ctrl; P8 - ctrl; P10 - P11; P10 - P2; P3 - P10; P10 - P8; P2 - P11; P3 - P11; P8 - P11; P3 - P2; P8 - P2; P3 - P8             |
| TC0700008539.hg.1 | TC0700008539.hg.1 | NA                            | NA            | NA       | 69.10 | 2.01 | 7.69 | 7.69 | ctrl - P10; ctrl - P11; ctrl - P2; ctrl - P3; ctrl - P8; P11 - P10; P2 - P10; P3 - P10; P2 - P11; P11 - P8; P2 - P3; P2 - P8; P3 - P8                     |
| TC1200012295.hg.1 | TC1200012295.hg.1 | ENST00000602474.1             | RP11-214K3.22 |          | 69.06 | 2.01 | 7.69 | 7.71 | ctrl - P10; ctrl - P11; P2 - ctrl; ctrl - P3; ctrl - P8; P11 - P10; P2 - P10; P3 - P10; P2 - P11; P11 - P8; P2 - P3; P2 - P8; P3 - P8                     |
| TC0300013074.hg.1 | TC0300013074.hg.1 | pergubo.aAug10-<br>unspliced  | pergubo       | NA       | 68.68 | 2.05 | 7.68 | 7.83 | ctrl - P10; ctrl - P11; P2 - ctrl; ctrl - P3; ctrl - P8; P2 - P10; P10 - P8; P2 - P11; P11 - P8; P2 - P3; P2 - P8; P3 - P8                                |
| TC2000007341.hg.1 | TC2000007341.hg.1 | NM_030919                     | FAM83D        | 81610    | 68.62 | 2.09 | 7.68 | 7.97 | P10 - ctrl; ctrl - P11; ctrl - P2; P3 - ctrl; P8 - ctrl; P10 - P11; P10 - P2; P10 - P3; P8 - P10; P3 - P11; P8 - P11; P3 - P2; P8 - P2; P8 - P3           |
| TC1000010509.hg.1 | TC1000010509.hg.1 | NM_001276343                  | AGAP4         | 119016   | 68.26 | 2.15 | 7.66 | 8.20 | ctrl - P10; ctrl - P11; P2 - ctrl; ctrl - P3; ctrl - P8; P11 - P10; P2 - P10; P3 - P10; P2 - P11; P11 - P8; P2 - P3; P2 - P8; P3 - P8                     |

|                   |                   |                                |               |        |       |      |      |      |                                                                                                                                                 |
|-------------------|-------------------|--------------------------------|---------------|--------|-------|------|------|------|-------------------------------------------------------------------------------------------------------------------------------------------------|
| TC0100015706.hg.1 | TC0100015706.hg.1 | uc057kit.1                     | AC239868.2    | NA     | 68.01 | 2.20 | 7.65 | 8.37 | P10 - ctrl; P11 - ctrl; P8 - ctrl; P10 - P11; P10 - P2; P10 - P3; P10 - P8; P11 - P2; P11 - P3; P8 - P11; P3 - P2; P8 - P2; P8 - P3             |
| TC1100012688.hg.1 | TC1100012688.hg.1 | NA                             | NA            | NA     | 67.99 | 2.20 | 7.65 | 8.37 | ctrl - P10; ctrl - P11; ctrl - P3; ctrl - P8; P11 - P10; P2 - P10; P3 - P10; P10 - P8; P2 - P11; P11 - P8; P2 - P3; P2 - P8; P3 - P8            |
| TC0X00010737.hg.1 | TC0X00010737.hg.1 | ENST00000625970                | SMAD5-AS1_2   |        | 67.95 | 2.21 | 7.65 | 8.38 | ctrl - P10; ctrl - P2; ctrl - P3; ctrl - P8; P11 - P10; P2 - P10; P3 - P10; P11 - P2; P11 - P3; P11 - P8; P2 - P3; P2 - P8; P3 - P8             |
| TC0700009134.hg.1 | TC0700009134.hg.1 | NM_001163446                   | CPA4          | 51200  | 67.83 | 2.23 | 7.65 | 8.45 | P3 - ctrl; P8 - ctrl; P10 - P11; P10 - P2; P3 - P10; P8 - P10; P3 - P11; P8 - P11; P3 - P2; P8 - P2; P3 - P8                                    |
| TC0100010921.hg.1 | TC0100010921.hg.1 | NM_031935                      | HMCN1         | 83872  | 67.73 | 2.25 | 7.64 | 8.51 | ctrl - P10; ctrl - P11; ctrl - P2; ctrl - P3; ctrl - P8; P11 - P10; P2 - P10; P10 - P8; P2 - P11; P11 - P3; P11 - P8; P2 - P3; P2 - P8; P3 - P8 |
| TC1500006570.hg.1 | TC1500006570.hg.1 | ENST00000604451.1              | RP11-701H24.7 |        | 67.66 | 2.26 | 7.64 | 8.55 | ctrl - P10; ctrl - P11; ctrl - P3; ctrl - P8; P11 - P10; P2 - P10; P3 - P10; P2 - P11; P11 - P3; P11 - P8; P2 - P3; P2 - P8; P3 - P8            |
| TC0200016557.hg.1 | TC0200016557.hg.1 | OTTHUMT00000480993             | AC013463.2    |        | 67.58 | 2.28 | 7.64 | 8.59 | ctrl - P10; P11 - ctrl; ctrl - P3; ctrl - P8; P11 - P10; P2 - P10; P11 - P2; P11 - P3; P11 - P8; P2 - P3; P2 - P8                               |
| TC0600011517.hg.1 | TC0600011517.hg.1 | NM_001242525                   | HLA-DPA1      | 3113   | 67.51 | 2.29 | 7.63 | 8.64 | P10 - ctrl; P8 - ctrl; P10 - P11; P10 - P2; P10 - P3; P8 - P10; P8 - P11; P8 - P2; P8 - P3                                                      |
| TC1200007594.hg.1 | TC1200007594.hg.1 | NM_001095                      | ASIC1         | 41     | 67.46 | 2.30 | 7.63 | 8.66 | P10 - ctrl; P3 - ctrl; P8 - ctrl; P10 - P11; P10 - P2; P8 - P10; P3 - P11; P8 - P11; P3 - P2; P8 - P2                                           |
| TC0100016359.hg.1 | TC0100016359.hg.1 | NM_000655                      | SELL          | 6402   | 67.39 | 2.32 | 7.63 | 8.70 | P10 - ctrl; P3 - ctrl; P8 - ctrl; P10 - P11; P10 - P2; P8 - P10; P3 - P11; P8 - P11; P3 - P2; P8 - P2; P8 - P3                                  |
| TC1700010625.hg.1 | TC1700010625.hg.1 | NM_032865                      | TNS4          | 84951  | 67.15 | 2.37 | 7.62 | 8.77 | P10 - ctrl; P3 - ctrl; P8 - ctrl; P10 - P11; P10 - P2; P3 - P10; P8 - P10; P3 - P11; P8 - P11; P3 - P2; P8 - P2; P3 - P8                        |
| TC0100017626.hg.1 | TC0100017626.hg.1 | NR_023364                      | RNA5S2        | 1E+08  | 67.09 | 2.38 | 7.62 | 8.77 | P10 - ctrl; P11 - ctrl; P2 - ctrl; P3 - ctrl; P8 - ctrl; P11 - P10; P2 - P10; P3 - P10; P8 - P10; P2 - P11; P3 - P11; P3 - P2; P2 - P8; P3 - P8 |
| TC0100017627.hg.1 | TC0100017627.hg.1 | NR_023365                      | RNA5S3        | 1E+08  | 67.09 | 2.38 | 7.62 | 8.77 | P10 - ctrl; P11 - ctrl; P2 - ctrl; P3 - ctrl; P8 - ctrl; P11 - P10; P2 - P10; P3 - P10; P8 - P10; P2 - P11; P3 - P11; P3 - P2; P2 - P8; P3 - P8 |
| TC0100017628.hg.1 | TC0100017628.hg.1 | NR_023366                      | RNA5S4        | 1E+08  | 67.09 | 2.38 | 7.62 | 8.77 | P10 - ctrl; P11 - ctrl; P2 - ctrl; P3 - ctrl; P8 - ctrl; P11 - P10; P2 - P10; P3 - P10; P8 - P10; P2 - P11; P3 - P11; P3 - P2; P2 - P8; P3 - P8 |
| TC0100017629.hg.1 | TC0100017629.hg.1 | NR_023363                      | RNA5S1        | 1E+08  | 67.09 | 2.38 | 7.62 | 8.77 | P10 - ctrl; P11 - ctrl; P2 - ctrl; P3 - ctrl; P8 - ctrl; P11 - P10; P2 - P10; P3 - P10; P8 - P10; P2 - P11; P3 - P11; P3 - P2; P2 - P8; P3 - P8 |
| TC0100017630.hg.1 | TC0100017630.hg.1 | NR_023368                      | RNA5S6        | 1E+08  | 67.09 | 2.38 | 7.62 | 8.77 | P10 - ctrl; P11 - ctrl; P2 - ctrl; P3 - ctrl; P8 - ctrl; P11 - P10; P2 - P10; P3 - P10; P8 - P10; P2 - P11; P3 - P11; P3 - P2; P2 - P8; P3 - P8 |
| TC0100017631.hg.1 | TC0100017631.hg.1 | NR_023373                      | RNA5S11       | 1E+08  | 67.09 | 2.38 | 7.62 | 8.77 | P10 - ctrl; P11 - ctrl; P2 - ctrl; P3 - ctrl; P8 - ctrl; P11 - P10; P2 - P10; P3 - P10; P8 - P10; P2 - P11; P3 - P11; P3 - P2; P2 - P8; P3 - P8 |
| TC0100017632.hg.1 | TC0100017632.hg.1 | ENST00000365651                | RNA5S7        | 1E+08  | 67.09 | 2.38 | 7.62 | 8.77 | P10 - ctrl; P11 - ctrl; P2 - ctrl; P3 - ctrl; P8 - ctrl; P11 - P10; P2 - P10; P3 - P10; P8 - P10; P2 - P11; P3 - P11; P3 - P2; P2 - P8; P3 - P8 |
| TC0100017633.hg.1 | TC0100017633.hg.1 | NR_023372                      | RNA5S10       | 1E+08  | 67.09 | 2.38 | 7.62 | 8.77 | P10 - ctrl; P11 - ctrl; P2 - ctrl; P3 - ctrl; P8 - ctrl; P11 - P10; P2 - P10; P3 - P10; P8 - P10; P2 - P11; P3 - P11; P3 - P2; P2 - P8; P3 - P8 |
| TC0100017635.hg.1 | TC0100017635.hg.1 | ENST00000363040                | RNA5S10       | 1E+08  | 67.09 | 2.38 | 7.62 | 8.77 | P10 - ctrl; P11 - ctrl; P2 - ctrl; P3 - ctrl; P8 - ctrl; P11 - P10; P2 - P10; P3 - P10; P8 - P10; P2 - P11; P3 - P11; P3 - P2; P2 - P8; P3 - P8 |
| TC0100017642.hg.1 | TC0100017642.hg.1 | ENST00000363500                | RNA5S17       | 1E+08  | 67.09 | 2.38 | 7.62 | 8.77 | P10 - ctrl; P11 - ctrl; P2 - ctrl; P3 - ctrl; P8 - ctrl; P11 - P10; P2 - P10; P3 - P10; P8 - P10; P2 - P11; P3 - P11; P3 - P2; P2 - P8; P3 - P8 |
| TC0X00008084.hg.1 | TC0X00008084.hg.1 | NM_000495                      | COL4A5        | 1287   | 66.90 | 2.42 | 7.61 | 8.90 | ctrl - P10; ctrl - P11; ctrl - P2; ctrl - P3; ctrl - P8; P11 - P10; P2 - P10; P3 - P10; P11 - P2; P11 - P3; P11 - P8; P2 - P3; P2 - P8; P3 - P8 |
| TC0500010822.hg.1 | TC0500010822.hg.1 | NM_001017992                   | ACTBL2        | 345651 | 66.89 | 2.42 | 7.61 | 8.90 | P10 - ctrl; P3 - ctrl; P8 - ctrl; P10 - P11; P10 - P2; P3 - P11; P8 - P11; P3 - P2; P8 - P2; P3 - P8                                            |
| TC1900007609.hg.1 | TC1900007609.hg.1 | NA                             | NA            | NA     | 66.87 | 2.42 | 7.61 | 8.90 | ctrl - P10; ctrl - P11; ctrl - P2; ctrl - P8; P3 - P10; P8 - P10; P2 - P11; P3 - P11; P8 - P11; P3 - P2; P8 - P2; P3 - P8                       |
| TC0X00008760.hg.1 | TC0X00008760.hg.1 | NM_001178106                   | ZNF185        | 7739   | 66.84 | 2.43 | 7.61 | 8.92 | P10 - ctrl; P3 - ctrl; P8 - ctrl; P10 - P11; P10 - P2; P8 - P10; P3 - P11; P8 - P11; P3 - P2; P8 - P2                                           |
| TC0200015529.hg.1 | TC0200015529.hg.1 | NM_001039845                   | MDH1B         | 130752 | 66.70 | 2.46 | 7.60 | 9.01 | ctrl - P10; ctrl - P11; ctrl - P2; ctrl - P3; ctrl - P8; P11 - P10; P2 - P10; P11 - P3; P11 - P8; P2 - P3; P2 - P8                              |
| TC0100007885.hg.1 | TC0100007885.hg.1 | stokloy.aAug10-<br>unspliced   | stokloy       | NA     | 66.66 | 2.47 | 7.60 | 9.03 | ctrl - P10; ctrl - P11; ctrl - P3; ctrl - P8; P11 - P10; P2 - P10; P10 - P8; P2 - P11; P11 - P3; P11 - P8; P2 - P3; P2 - P8; P3 - P8            |
| TC0200009681.hg.1 | TC0200009681.hg.1 | plufubu.aAug10-<br>unspliced   | plufubu       | NA     | 66.63 | 2.47 | 7.60 | 9.04 | ctrl - P10; ctrl - P11; P2 - ctrl; ctrl - P3; ctrl - P8; P10 - P11; P2 - P10; P10 - P8; P2 - P11; P3 - P11; P11 - P8; P2 - P3; P2 - P8; P3 - P8 |
| TC0600010078.hg.1 | TC0600010078.hg.1 | NM_021977                      | SLC22A3       | 6581   | 66.32 | 2.54 | 7.59 | 9.27 | ctrl - P10; P11 - ctrl; ctrl - P2; ctrl - P8; P11 - P10; P2 - P10; P3 - P10; P11 - P2; P11 - P3; P11 - P8; P3 - P2; P2 - P8; P3 - P8            |
| TC0900007845.hg.1 | TC0900007845.hg.1 | plawtawbo.aAug10-<br>unspliced | plawtawbo     | NA     | 66.19 | 2.57 | 7.59 | 9.36 | ctrl - P10; ctrl - P11; P2 - ctrl; ctrl - P3; ctrl - P8; P2 - P10; P3 - P10; P2 - P11; P3 - P11; P11 - P8; P2 - P3; P2 - P8; P3 - P8            |
| TC0400008030.hg.1 | TC0400008030.hg.1 | NM_001025616                   | ARHGAP24      | 83478  | 66.16 | 2.58 | 7.58 | 9.36 | ctrl - P10; ctrl - P2; ctrl - P3; ctrl - P8; P11 - P10; P11 - P2; P11 - P3; P11 - P8                                                            |
| TC0500006472.hg.1 | TC0500006472.hg.1 | NM_001166260                   | TRIP13        | 9319   | 66.15 | 2.58 | 7.58 | 9.36 | P10 - ctrl; ctrl - P11; ctrl - P2; P3 - ctrl; P8 - ctrl; P10 - P11; P10 - P2; P10 - P3; P8 - P10; P3 - P11; P8 - P11; P3 - P2; P8 - P2; P8 - P3 |
| TC0Y00007306.hg.1 | TC0Y00007306.hg.1 | NA                             | NA            | NA     | 66.14 | 2.58 | 7.58 | 9.36 | ctrl - P10; ctrl - P11; ctrl - P2; ctrl - P3; ctrl - P8; P11 - P10; P3 - P10; P8 - P10; P11 - P2; P3 - P11; P3 - P2; P8 - P2; P3 - P8           |

|                   |                   |                                 |             |         |       |      |      |      |                                                                                                                                                 |
|-------------------|-------------------|---------------------------------|-------------|---------|-------|------|------|------|-------------------------------------------------------------------------------------------------------------------------------------------------|
| TC0200008534.hg.1 | TC0200008534.hg.1 | NM_001164315                    | ANKRD36     | 375248  | 66.11 | 2.59 | 7.58 | 9.37 | ctrl - P10; ctrl - P11; ctrl - P3; ctrl - P8; P2 - P10; P3 - P10; P10 - P8; P2 - P11; P3 - P11; P11 - P8; P2 - P3; P2 - P8; P3 - P8             |
| TC1600011363.hg.1 | TC1600011363.hg.1 | NR_027154                       | SMG1P1      | 641298  | 65.5  | 2.64 | 7.57 | 9.54 | ctrl - P10; ctrl - P11; ctrl - P3; ctrl - P8; P2 - P10; P10 - P3; P10 - P8; P2 - P11; P11 - P3; P11 - P8; P2 - P3; P2 - P8                      |
| TC0500011031.hg.1 | TC0500011031.hg.1 | NA                              | NA          | NA      | 65.81 | 2.66 | 7.57 | 9.59 | ctrl - P10; ctrl - P11; ctrl - P3; ctrl - P8; P11 - P10; P2 - P10; P3 - P10; P2 - P11; P11 - P3; P11 - P8; P2 - P3; P2 - P8; P3 - P8            |
| TC1100011184.hg.1 | TC1100011184.hg.1 | hsa_circ_0000321                | SF1         | NA      | 65.74 | 2.67 | 7.57 | 9.64 | ctrl - P10; ctrl - P11; ctrl - P3; ctrl - P8; P11 - P10; P2 - P10; P3 - P10; P10 - P8; P2 - P11; P11 - P8; P2 - P3; P2 - P8; P3 - P8            |
| TC0600007655.hg.1 | TC0600007655.hg.1 | NA                              | NA          | NA      | 65.67 | 2.69 | 7.57 | 9.68 | P10 - ctrl; P8 - ctrl; P10 - P11; P10 - P2; P10 - P3; P8 - P11; P8 - P2; P8 - P3                                                                |
| TC1800008901.hg.1 | TC1800008901.hg.1 | ENST00000588307.1               | RP11-28F1.2 | NA      | 65.63 | 2.70 | 7.56 | 9.70 | ctrl - P10; ctrl - P11; P2 - ctrl; ctrl - P3; ctrl - P8; P2 - P10; P10 - P3; P10 - P8; P2 - P11; P11 - P3; P11 - P8; P2 - P3; P2 - P8           |
| TC1100009291.hg.1 | TC1100009291.hg.1 | kesimi.bAug10-<br>unspliced     | kesimi      | NA      | 65.61 | 2.70 | 7.56 | 9.71 | ctrl - P10; ctrl - P11; P2 - ctrl; ctrl - P8; P11 - P10; P2 - P10; P3 - P10; P2 - P11; P3 - P11; P11 - P8; P2 - P3; P2 - P8; P3 - P8            |
| TC2000009550.hg.1 | TC2000009550.hg.1 | NM_003600                       | AURKA       | 6790    | 65.57 | 2.71 | 7.56 | 9.73 | P10 - ctrl; ctrl - P11; ctrl - P2; P8 - ctrl; P10 - P11; P10 - P2; P10 - P3; P8 - P10; P3 - P11; P8 - P11; P3 - P2; P8 - P2; P8 - P3            |
| TC0700009079.hg.1 | TC0700009079.hg.1 | NM_178562                       | TSPAN33     | 340348  | 65.51 | 2.73 | 7.56 | 9.76 | ctrl - P10; P11 - ctrl; ctrl - P2; ctrl - P3; ctrl - P8; P11 - P10; P11 - P2; P11 - P3; P11 - P8; P3 - P2                                       |
| TC0800007065.hg.1 | TC0800007065.hg.1 | NM_152562                       | CDCA2       | 157313  | 65.32 | 2.77 | 7.55 | 9.91 | P10 - ctrl; P3 - ctrl; P8 - ctrl; P10 - P11; P10 - P2; P10 - P3; P8 - P10; P3 - P11; P8 - P11; P3 - P2; P8 - P2; P8 - P3                        |
| TC0400011018.hg.1 | TC0400011018.hg.1 | NM_002089                       | CXCL2       | 2920    | 65.26 | 2.79 | 7.55 | 9.95 | P10 - ctrl; ctrl - P2; P3 - ctrl; P8 - ctrl; P10 - P11; P10 - P2; P10 - P3; P3 - P11; P8 - P11; P3 - P2; P8 - P2; P8 - P3                       |
| TC1100009760.hg.1 | TC1100009760.hg.1 | spaforby.aAug10-<br>unspliced   | spaforby    | NA      | 65.25 | 2.79 | 7.55 | 9.95 | ctrl - P10; ctrl - P11; ctrl - P2; ctrl - P3; ctrl - P8; P3 - P10; P3 - P11; P11 - P8; P3 - P2; P3 - P8                                         |
| TC0600010237.hg.1 | TC0600010237.hg.1 | toysmerby.aAug10-<br>unspliced  | toysmerby   | NA      | 65.16 | 2.81 | 7.55 | 1.00 | ctrl - P10; ctrl - P11; ctrl - P3; ctrl - P8; P11 - P10; P2 - P10; P10 - P8; P2 - P11; P11 - P8; P2 - P3; P2 - P8; P3 - P8                      |
| TC0200008099.hg.1 | TC0200008099.hg.1 | NM_000189                       | HK2         | 3099    | 65.16 | 2.81 | 7.55 | 1.00 | P10 - ctrl; P11 - ctrl; P3 - ctrl; P8 - ctrl; P10 - P2; P10 - P3; P11 - P2; P11 - P3; P11 - P8; P3 - P2; P8 - P2                                |
| TC0200015264.hg.1 | TC0200015264.hg.1 | NM_004657                       | SDPR        | 8436    | 65.11 | 2.83 | 7.54 | 1.00 | ctrl - P10; P11 - ctrl; ctrl - P2; ctrl - P3; ctrl - P8; P11 - P10; P3 - P10; P8 - P10; P11 - P2; P11 - P3; P11 - P8; P3 - P2; P8 - P2; P3 - P8 |
| TC1600007999.hg.1 | TC1600007999.hg.1 | NM_001304392                    | CX3CL1      | 6376    | 65.04 | 2.84 | 7.54 | 1.01 | P10 - ctrl; P11 - ctrl; ctrl - P2; P3 - ctrl; P8 - ctrl; P10 - P11; P10 - P2; P10 - P3; P11 - P2; P8 - P11; P3 - P2; P8 - P2                    |
| TC1900009076.hg.1 | TC1900009076.hg.1 | NM_003712                       | PLPP2       | 8612    | 65.03 | 2.84 | 7.54 | 1.01 | P10 - ctrl; P11 - ctrl; P3 - ctrl; P8 - ctrl; P10 - P11; P10 - P2; P10 - P3; P11 - P2; P8 - P11; P3 - P2; P8 - P2; P8 - P3                      |
| TC0400012147.hg.1 | TC0400012147.hg.1 | feefloy.aAug10-<br>unspliced    | feefloy     | NA      | 64.93 | 2.87 | 7.54 | 1.01 | ctrl - P10; ctrl - P11; P2 - ctrl; ctrl - P3; ctrl - P8; P2 - P10; P3 - P10; P2 - P11; P3 - P11; P11 - P8; P2 - P3; P2 - P8; P3 - P8            |
| TC0700010536.hg.1 | TC0700010536.hg.1 | ENST00000608362.1               | CTB-119C2.1 | NA      | 64.90 | 2.88 | 7.54 | 1.02 | ctrl - P10; ctrl - P11; ctrl - P2; ctrl - P3; ctrl - P8; P11 - P10; P2 - P10; P3 - P10; P2 - P11; P11 - P8; P2 - P3; P2 - P8; P3 - P8           |
| TC0500008833.hg.1 | TC0500008833.hg.1 | cherskorby.aAug10-<br>unspliced | cherskorby  | NA      | 64.68 | 2.93 | 7.53 | 1.03 | ctrl - P10; ctrl - P11; P2 - ctrl; ctrl - P3; ctrl - P8; P10 - P11; P2 - P10; P10 - P8; P2 - P11; P3 - P11; P2 - P3; P2 - P8; P3 - P8           |
| TC0300013698.hg.1 | TC0300013698.hg.1 | rorverbo.aAug10-<br>unspliced   | rorverbo    | NA      | 64.57 | 2.96 | 7.52 | 1.04 | ctrl - P10; ctrl - P11; P2 - ctrl; ctrl - P3; ctrl - P8; P2 - P10; P10 - P8; P2 - P11; P11 - P8; P2 - P3; P2 - P8; P3 - P8                      |
| TC0700008184.hg.1 | TC0700008184.hg.1 | sneeko.aAug10-<br>unspliced     | sneeko      | NA      | 64.56 | 2.96 | 7.52 | 1.04 | ctrl - P10; ctrl - P11; ctrl - P3; ctrl - P8; P11 - P10; P2 - P10; P3 - P10; P10 - P8; P2 - P11; P11 - P8; P2 - P3; P2 - P8; P3 - P8            |
| TC1400007584.hg.1 | TC1400007584.hg.1 | NM_015351                       | TTC9        | 23508   | 64.50 | 2.98 | 7.52 | 1.05 | P10 - ctrl; ctrl - P2; P3 - ctrl; P8 - ctrl; P10 - P11; P10 - P2; P11 - P2; P3 - P11; P8 - P11; P3 - P2; P8 - P2                                |
| TC1100012966.hg.1 | TC1100012966.hg.1 | NM_001282663                    | MICAL2      | 9645    | 64.29 | 3.04 | 7.51 | 1.06 | P10 - ctrl; P3 - ctrl; P8 - ctrl; P10 - P11; P10 - P2; P10 - P3; P8 - P10; P3 - P11; P8 - P11; P3 - P2; P8 - P2; P8 - P3                        |
| TC0600008630.hg.1 | TC0600008630.hg.1 | NM_001166691                    | TTK         | 7272    | 64.22 | 3.06 | 7.51 | 1.07 | P10 - ctrl; ctrl - P11; ctrl - P2; P8 - ctrl; P10 - P11; P10 - P2; P10 - P3; P8 - P10; P3 - P11; P8 - P11; P3 - P2; P8 - P2; P8 - P3            |
| TC1100007510.hg.1 | TC1100007510.hg.1 | keeney.aAug10-<br>unspliced     | keeney      | NA      | 64.22 | 3.06 | 7.51 | 1.07 | ctrl - P10; ctrl - P11; ctrl - P8; P2 - P10; P3 - P10; P2 - P11; P3 - P11; P11 - P8; P2 - P8; P3 - P8                                           |
| TC0700006813.hg.1 | TC0700006813.hg.1 | NM_001204144                    | HDAC9       | 9734    | 64.18 | 3.07 | 7.51 | 1.07 | P10 - ctrl; P3 - ctrl; P8 - ctrl; P10 - P11; P10 - P2; P10 - P3; P2 - P11; P3 - P11; P8 - P11; P3 - P2; P8 - P2; P8 - P3                        |
| TC0100009908.hg.1 | TC0100009908.hg.1 | NM_001202858                    | ECM1        | 1893    | 64.10 | 3.09 | 7.51 | 1.08 | P10 - ctrl; P3 - ctrl; P8 - ctrl; P10 - P11; P10 - P2; P8 - P10; P3 - P11; P8 - P11; P3 - P2; P8 - P2; P8 - P3                                  |
| TC1500010699.hg.1 | TC1500010699.hg.1 | NA                              | NA          | NA      | 63.92 | 3.14 | 7.50 | 1.09 | ctrl - P10; ctrl - P11; P2 - ctrl; ctrl - P3; ctrl - P8; P11 - P10; P2 - P10; P3 - P10; P2 - P11; P11 - P8; P2 - P3; P2 - P8; P3 - P8           |
| TC0200009095.hg.1 | TC0200009095.hg.1 | NM_002193                       | INHBB       | 3625    | 63.76 | 3.19 | 7.49 | 1.11 | P10 - ctrl; ctrl - P11; ctrl - P2; P3 - ctrl; P8 - ctrl; P10 - P11; P10 - P2; P3 - P11; P8 - P11; P3 - P2; P8 - P2; P8 - P3                     |
| TC1500010368.hg.1 | TC1500010368.hg.1 | NM_001307952                    | HAPLN3      | 145864  | 63.66 | 3.22 | 7.49 | 1.12 | P10 - ctrl; P3 - ctrl; P8 - ctrl; P10 - P11; P10 - P2; P10 - P3; P8 - P10; P3 - P11; P8 - P11; P3 - P2; P8 - P2; P8 - P3                        |
| TC2200007894.hg.1 | TC2200007894.hg.1 | NM_001282225                    | CECR1       | 51816   | 63.53 | 3.25 | 7.48 | 1.13 | ctrl - P10; ctrl - P2; ctrl - P3; ctrl - P8; P11 - P10; P10 - P3; P10 - P8; P11 - P2; P11 - P3; P11 - P8; P2 - P3; P2 - P8                      |
| TC0500011225.hg.1 | TC0500011225.hg.1 | NM_005779                       | LHFPL2      | 10184   | 63.43 | 3.28 | 7.48 | 1.14 | P10 - ctrl; P11 - ctrl; P3 - ctrl; P8 - ctrl; P10 - P11; P10 - P2; P8 - P10; P3 - P11; P8 - P11; P3 - P2; P8 - P2; P8 - P3                      |
| TC1500006592.hg.1 | TC1500006592.hg.1 | NR_003307                       | SNORD115-15 | 15q11.2 | 63.34 | 3.31 | 7.48 | 1.14 | P10 - ctrl; P11 - ctrl; P2 - ctrl; P3 - ctrl; P8 - ctrl; P10 - P11; P10 - P2; P3 - P10; P3 - P11; P8 - P11; P3 - P2; P8 - P2; P3 - P8           |

|                   |                   |                               |              |        |             |              |            |              |                                                                                                                                                  |
|-------------------|-------------------|-------------------------------|--------------|--------|-------------|--------------|------------|--------------|--------------------------------------------------------------------------------------------------------------------------------------------------|
| TC0300010135.hg.1 | TC0300010135.hg.1 | NR_004428                     | EGOT         | 1E+08  | 63.31<br>9  | 3.32<br>E-08 | 7.47<br>93 | 1.14<br>E-07 | ctrl - P10; ctrl - P11; ctrl - P2; ctrl - P3; ctrl - P8; P11 - P10; P2 - P10; P3 - P10; P11 - P2; P11 - P3; P11 - P8; P2 - P8                    |
| TC0600007596.hg.1 | TC0600007596.hg.1 | ENST00000449264               | TNF          | 7124   | 63.19<br>6  | 3.35<br>E-08 | 7.47<br>43 | 1.16<br>E-07 | P10 - ctrl; ctrl - P2; P3 - ctrl; P8 - ctrl; P10 - P11; P10 - P2; P8 - P10; P11 - P2; P3 - P11; P8 - P11; P3 - P2; P8 - P2; P8 - P3              |
| TC0900010219.hg.1 | TC0900010219.hg.1 | NR_002817                     | AQP7P1       | 375719 | 63.06<br>6  | 3.39<br>E-08 | 7.46<br>94 | 1.17<br>E-07 | P10 - ctrl; P2 - ctrl; P3 - ctrl; P8 - ctrl; P10 - P11; P3 - P10; P8 - P10; P2 - P11; P3 - P11; P8 - P11; P3 - P2; P8 - P2; P3 - P8              |
| TC0500013385.hg.1 | TC0500013385.hg.1 | NM_024577                     | SH3TC2       | 79628  | 63.06<br>2  | 3.39<br>E-08 | 7.46<br>92 | 1.17<br>E-07 | P10 - ctrl; P3 - ctrl; P8 - ctrl; P10 - P11; P10 - P2; P3 - P10; P8 - P10; P3 - P11; P8 - P11; P3 - P2; P8 - P2; P3 - P8                         |
| TC0700010543.hg.1 | TC0700010543.hg.1 | ENST00000451264.1             | AC004540.4   |        | 62.69<br>1  | 3.51<br>E-08 | 7.45<br>46 | 1.21<br>E-07 | ctrl - P10; ctrl - P2; ctrl - P3; ctrl - P8; P11 - P10; P2 - P10; P11 - P2; P11 - P3; P11 - P8; P2 - P3                                          |
| TC0100017167.hg.1 | TC0100017167.hg.1 | NM_000228                     | LAMB3        | 3914   | 62.45<br>5  | 3.59<br>E-08 | 7.44<br>52 | 1.23<br>E-07 | P10 - ctrl; ctrl - P2; P3 - ctrl; P8 - ctrl; P10 - P11; P10 - P2; P10 - P3; P11 - P2; P3 - P11; P8 - P11; P3 - P2; P8 - P2; P8 - P3              |
| TC1300009674.hg.1 | TC1300009674.hg.1 | NM_024089                     | KDELC1       | 79070  | 62.24<br>24 | 3.66<br>E-08 | 7.43<br>66 | 1.25<br>E-07 | ctrl - P10; ctrl - P11; ctrl - P2; ctrl - P3; ctrl - P8; P11 - P10; P2 - P10; P3 - P10; P8 - P10; P11 - P2; P11 - P3; P11 - P8; P2 - P8; P3 - P8 |
| TC0100007102.hg.1 | TC0100007102.hg.1 | NM_013358                     | PADI1        | 29943  | 62.14<br>6  | 3.69<br>E-08 | 7.43<br>28 | 1.26<br>E-07 | P10 - ctrl; P3 - ctrl; P8 - ctrl; P10 - P11; P10 - P2; P8 - P10; P3 - P11; P8 - P11; P3 - P2; P8 - P2                                            |
| TC0800006887.hg.1 | TC0800006887.hg.1 | NM_000662                     | NAT1         | 9      | 62.04<br>6  | 3.73<br>E-08 | 7.42<br>88 | 1.27<br>E-07 | P10 - ctrl; P3 - ctrl; P8 - ctrl; P10 - P11; P10 - P2; P10 - P3; P3 - P11; P8 - P11; P3 - P2; P8 - P2; P8 - P3                                   |
| TC0500012312.hg.1 | TC0500012312.hg.1 | NM_001127496                  | SPRY4        | 81848  | 62.03<br>2  | 3.73<br>E-08 | 7.42<br>83 | 1.27<br>E-07 | P10 - ctrl; P11 - ctrl; P3 - ctrl; P8 - ctrl; P10 - P11; P10 - P2; P11 - P2; P3 - P11; P8 - P11; P3 - P2; P8 - P2                                |
| TC0600007375.hg.1 | TC0600007375.hg.1 | NM_003536                     | HIST1H3H     | 8357   | 61.98<br>6  | 3.75<br>E-08 | 7.42<br>64 | 1.28<br>E-07 | P10 - ctrl; ctrl - P2; P3 - ctrl; P8 - ctrl; P10 - P11; P10 - P2; P10 - P3; P11 - P2; P3 - P11; P8 - P11; P3 - P2; P8 - P2; P8 - P3              |
| TC0500007379.hg.1 | TC0500007379.hg.1 | uc063dny.1                    | AC024569.1   | NA     | 61.88<br>8  | 3.78<br>E-08 | 7.42<br>22 | 1.29<br>E-07 | ctrl - P10; ctrl - P11; P2 - ctrl; ctrl - P3; ctrl - P8; P2 - P10; P3 - P10; P10 - P8; P2 - P11; P11 - P8; P3 - P2; P3 - P8; P3 - P8             |
| TC0800011909.hg.1 | TC0800011909.hg.1 | ENST00000623679               | AC083843.4   |        | 61.87<br>8  | 3.79<br>E-08 | 7.42<br>17 | 1.29<br>E-07 | ctrl - P10; ctrl - P11; P2 - ctrl; ctrl - P3; ctrl - P8; P11 - P10; P2 - P10; P10 - P8; P2 - P11; P11 - P3; P11 - P8; P2 - P3; P2 - P8; P3 - P8  |
| TC0900008054.hg.1 | TC0900008054.hg.1 | NA                            | NA           | NA     | 61.75<br>8  | 3.83<br>E-08 | 7.41<br>72 | 1.30<br>E-07 | ctrl - P10; ctrl - P11; P2 - ctrl; ctrl - P3; ctrl - P8; P2 - P10; P3 - P10; P10 - P8; P2 - P11; P11 - P8; P2 - P3; P2 - P8; P3 - P8             |
| TC1200012708.hg.1 | TC1200012708.hg.1 | NM_001032409                  | OAS1         | 4938   | 61.61<br>68 | 3.85<br>E-08 | 7.41<br>41 | 1.31<br>E-07 | P10 - ctrl; ctrl - P2; P3 - ctrl; P8 - ctrl; P10 - P11; P10 - P2; P3 - P10; P8 - P10; P11 - P2; P3 - P11; P8 - P11; P3 - P2; P8 - P2             |
| TC0600006762.hg.1 | TC0600006762.hg.1 | NR_106988_7                   | MIR7641-2    |        | 61.64<br>4  | 3.87<br>E-08 | 7.41<br>26 | 1.31<br>E-07 | P10 - ctrl; P11 - ctrl; P2 - ctrl; P3 - ctrl; P8 - ctrl; P11 - P10; P2 - P10; P3 - P10; P8 - P10; P2 - P11; P3 - P11; P3 - P2; P2 - P8; P3 - P8  |
| TC0400009258.hg.1 | TC0400009258.hg.1 | NM_001166108                  | PALLD        | 23022  | 61.60<br>8  | 3.88<br>E-08 | 7.41<br>12 | 1.31<br>E-07 | P10 - ctrl; ctrl - P11; P8 - ctrl; P10 - P11; P10 - P2; P10 - P3; P2 - P11; P3 - P11; P8 - P11; P3 - P2; P8 - P2; P8 - P3                        |
| TC1200011251.hg.1 | TC1200011251.hg.1 | NM_004616                     | TSPAN8       | 7103   | 61.31<br>31 | 3.99<br>E-08 | 7.39<br>91 | 1.35<br>E-07 | P10 - ctrl; ctrl - P2; P3 - ctrl; P8 - ctrl; P10 - P11; P10 - P2; P3 - P11; P8 - P11; P3 - P2; P8 - P2                                           |
| TC0800011148.hg.1 | TC0800011148.hg.1 | NM_057749                     | CCNE2        | 9134   | 61.25<br>6  | 4.01<br>E-08 | 7.39<br>69 | 1.35<br>E-07 | P10 - ctrl; ctrl - P11; P3 - ctrl; P8 - ctrl; P10 - P11; P10 - P2; P3 - P10; P8 - P10; P2 - P11; P3 - P11; P8 - P11; P3 - P2; P8 - P2            |
| TC0100009307.hg.1 | TC0100009307.hg.1 | NM_001113226                  | NTNG1        | 22854  | 61.20<br>6  | 4.03<br>E-08 | 7.39<br>49 | 1.35<br>E-07 | ctrl - P10; P11 - ctrl; ctrl - P2; P3 - ctrl; P11 - P10; P2 - P10; P3 - P10; P8 - P10; P11 - P2; P11 - P8; P3 - P2; P3 - P8                      |
| TC2000009887.hg.1 | TC2000009887.hg.1 | NM_015192                     | PLCB1        | 23236  | 61.07<br>07 | 4.08<br>E-08 | 7.38<br>94 | 1.37<br>E-07 | ctrl - P10; P11 - ctrl; ctrl - P2; ctrl - P3; ctrl - P8; P11 - P10; P2 - P10; P11 - P2; P11 - P3; P11 - P8; P2 - P3; P2 - P8                     |
| TC0800008512.hg.1 | TC0800008512.hg.1 | glydarby.aAug10-<br>unspliced | glydarby     | NA     | 61.05<br>7  | 4.08<br>E-08 | 7.38<br>88 | 1.37<br>E-07 | ctrl - P10; ctrl - P11; P2 - ctrl; ctrl - P3; ctrl - P8; P2 - P10; P3 - P10; P2 - P11; P3 - P11; P2 - P3; P2 - P8; P3 - P8                       |
| TC0200014704.hg.1 | TC0200014704.hg.1 | ENST00000463588               | RN7SL393P    |        | 61.01<br>8  | 4.10<br>E-08 | 7.38<br>72 | 1.37<br>E-07 | ctrl - P10; ctrl - P11; ctrl - P3; ctrl - P8; P11 - P10; P2 - P10; P10 - P8; P2 - P11; P11 - P3; P11 - P8; P2 - P3; P2 - P8; P3 - P8             |
| TC1500007160.hg.1 | TC1500007160.hg.1 | NA                            | NA           | NA     | 61.00<br>6  | 4.10<br>E-08 | 7.38<br>68 | 1.37<br>E-07 | ctrl - P10; ctrl - P2; ctrl - P3; ctrl - P8; P11 - P10; P10 - P8; P11 - P2; P11 - P3; P11 - P8; P2 - P3; P2 - P8                                 |
| TC2100007424.hg.1 | TC2100007424.hg.1 | NA                            | NA           | NA     | 60.98<br>2  | 4.11<br>E-08 | 7.38<br>58 | 1.37<br>E-07 | ctrl - P10; ctrl - P11; ctrl - P2; ctrl - P3; ctrl - P8; P2 - P10; P3 - P10; P2 - P11; P3 - P11; P2 - P3; P2 - P8; P3 - P8                       |
| TC0700012140.hg.1 | TC0700012140.hg.1 | NR_027374                     | LHFPL3-A52   | 723809 | 60.96<br>4  | 4.12<br>E-08 | 7.38<br>51 | 1.37<br>E-07 | ctrl - P10; P11 - ctrl; P3 - ctrl; ctrl - P8; P11 - P10; P2 - P10; P3 - P10; P11 - P2; P11 - P3; P11 - P8; P3 - P2; P2 - P8; P3 - P8             |
| TC1200011959.hg.1 | TC1200011959.hg.1 | NA                            | NA           | NA     | 60.89<br>2  | 4.15<br>E-08 | 7.38<br>21 | 1.38<br>E-07 | ctrl - P10; ctrl - P11; ctrl - P3; ctrl - P8; P11 - P10; P2 - P10; P3 - P10; P2 - P11; P11 - P3; P11 - P8; P2 - P3; P2 - P8; P3 - P8             |
| TC0100015550.hg.1 | TC0100015550.hg.1 | NM_001287385                  | FAM72C       | 554282 | 60.87<br>9  | 4.15<br>E-08 | 7.38<br>16 | 1.38<br>E-07 | P10 - ctrl; ctrl - P11; P8 - ctrl; P10 - P11; P10 - P2; P10 - P3; P8 - P10; P3 - P11; P8 - P11; P3 - P2; P8 - P2; P8 - P3                        |
| TC0100017634.hg.1 | TC0100017634.hg.1 | NR_023371                     | RNA5S9       | 1E+08  | 60.78<br>6  | 4.19<br>E-08 | 7.37<br>78 | 1.39<br>E-07 | P10 - ctrl; P11 - ctrl; P2 - ctrl; P3 - ctrl; P8 - ctrl; P11 - P10; P2 - P10; P3 - P10; P8 - P10; P2 - P11; P3 - P11; P3 - P2; P2 - P8; P3 - P8  |
| TC0200014088.hg.1 | TC0200014088.hg.1 | ronemo.aAug10-<br>unspliced   | ronemo       | NA     | 60.76<br>4  | 4.20<br>E-08 | 7.37<br>69 | 1.39<br>E-07 | ctrl - P10; ctrl - P11; ctrl - P2; ctrl - P3; ctrl - P8; P11 - P10; P2 - P10; P3 - P10; P2 - P11; P3 - P11; P11 - P8; P2 - P3; P2 - P8; P3 - P8  |
| TC1600006949.hg.1 | TC1600006949.hg.1 | ENST00000561528.1             | RP11-165M1.2 |        | 60.72<br>5  | 4.21<br>E-08 | 7.37<br>53 | 1.40<br>E-07 | ctrl - P10; P2 - ctrl; ctrl - P3; ctrl - P8; P11 - P10; P2 - P10; P3 - P10; P2 - P11; P11 - P3; P11 - P8; P2 - P3; P2 - P8; P3 - P8              |
| TC1200007352.hg.1 | TC1200007352.hg.1 | NM_198578                     | LRRK2        | 120892 | 60.65<br>6  | 4.24<br>E-08 | 7.37<br>25 | 1.40<br>E-07 | ctrl - P10; ctrl - P3; ctrl - P8; P11 - P10; P2 - P10; P3 - P10; P10 - P8; P11 - P8; P2 - P3; P2 - P8; P3 - P8                                   |
| TC1600011496.hg.1 | TC1600011496.hg.1 | NM_001304771                  | GPRC5B       | 51704  | 60.38<br>2  | 4.35<br>E-08 | 7.36<br>12 | 1.44<br>E-07 | P10 - ctrl; P11 - ctrl; ctrl - P2; ctrl - P3; P8 - ctrl; P11 - P10; P10 - P2; P10 - P3; P11 - P2; P11 - P3; P8 - P2; P8 - P3                     |

|                   |                   |                                |            |          |       |      |      |      |                                                                                                                                                 |
|-------------------|-------------------|--------------------------------|------------|----------|-------|------|------|------|-------------------------------------------------------------------------------------------------------------------------------------------------|
| TC1700007216.hg.1 | TC1700007216.hg.1 | NR_023380                      | CCDC144CP  | 348254   | 60.30 | 4.39 | 7.35 | 1.45 | ctrl - P10; ctrl - P11; ctrl - P3; ctrl - P8; P11 - P10; P2 - P10; P3 - P10; P2 - P11; P11 - P3; P11 - P8; P2 - P3; P2 - P8; P3 - P8            |
| TC2100008521.hg.1 | TC2100008521.hg.1 | NM_001278650                   | B3GALT5    | 10317    | 60.19 | 4.43 | 7.35 | 1.46 | ctrl - P10; ctrl - P2; ctrl - P3; ctrl - P8; P11 - P10; P2 - P10; P3 - P10; P11 - P2; P11 - P3; P11 - P8; P2 - P8; P3 - P8                      |
| TC0800012319.hg.1 | TC0800012319.hg.1 | NR_105006                      | LINC01111  | 1.02E+08 | 60.15 | 4.45 | 7.35 | 1.46 | ctrl - P10; ctrl - P11; ctrl - P2; ctrl - P3; ctrl - P8; P2 - P10; P10 - P3; P10 - P8; P2 - P11; P11 - P3; P11 - P8; P2 - P3; P2 - P8; P8 - P3  |
| TC1000012480.hg.1 | TC1000012480.hg.1 | NM_000772                      | CYP2C18    | 1562     | 59.83 | 4.58 | 7.33 | 1.51 | P10 - ctrl; P11 - ctrl; P3 - ctrl; P8 - ctrl; P10 - P11; P10 - P2; P10 - P3; P10 - P8; P8 - P11; P8 - P2; P8 - P3                               |
| TC1100013081.hg.1 | TC1100013081.hg.1 | NM_002033                      | FUT4       | 2526     | 59.83 | 4.59 | 7.33 | 1.51 | P10 - ctrl; P3 - ctrl; P8 - ctrl; P10 - P11; P10 - P2; P10 - P3; P8 - P11; P8 - P2; P8 - P3                                                     |
| TC0700012998.hg.1 | TC0700012998.hg.1 | NR_027788                      | ZNF767P    | 79970    | 59.82 | 4.59 | 7.33 | 1.51 | ctrl - P10; ctrl - P11; ctrl - P3; ctrl - P8; P11 - P10; P2 - P10; P3 - P10; P2 - P11; P11 - P8; P2 - P3; P2 - P8; P3 - P8                      |
| TC1000008226.hg.1 | TC1000008226.hg.1 | NR_038464                      | LINC00857  | 439990   | 59.64 | 4.67 | 7.33 | 1.53 | P10 - ctrl; P11 - ctrl; P3 - ctrl; P8 - ctrl; P10 - P11; P10 - P2; P10 - P3; P8 - P11; P3 - P2; P8 - P2; P8 - P3                                |
| TC0200009902.hg.1 | TC0200009902.hg.1 | NM_001171631                   | NOSTRIN    | 115677   | 59.58 | 4.69 | 7.32 | 1.54 | ctrl - P10; ctrl - P2; P3 - ctrl; ctrl - P8; P11 - P10; P2 - P10; P3 - P10; P11 - P2; P3 - P11; P11 - P8; P3 - P2; P2 - P8; P3 - P8             |
| TC0700008107.hg.1 | TC0700008107.hg.1 | klorpla.aAug10-<br>unspliced   | klorpla    | NA       | 59.47 | 4.75 | 7.32 | 1.55 | ctrl - P10; ctrl - P11; P2 - ctrl; ctrl - P3; ctrl - P8; P11 - P10; P2 - P10; P3 - P10; P10 - P8; P2 - P11; P11 - P8; P2 - P3; P2 - P8; P3 - P8 |
| TC0800007731.hg.1 | TC0800007731.hg.1 | kehare.aAug10-<br>unspliced    | kehare     | NA       | 59.35 | 4.80 | 7.31 | 1.57 | ctrl - P10; ctrl - P11; ctrl - P3; ctrl - P8; P11 - P10; P2 - P10; P3 - P10; P10 - P8; P2 - P11; P11 - P8; P2 - P3; P2 - P8; P3 - P8            |
| TC1500010712.hg.1 | TC1500010712.hg.1 | ENST00000448387                | GOLGA8N    | 643699   | 59.20 | 4.87 | 7.31 | 1.59 | ctrl - P10; ctrl - P11; ctrl - P2; ctrl - P3; ctrl - P8; P11 - P10; P2 - P10; P3 - P10; P2 - P11; P11 - P8; P2 - P3; P2 - P8; P3 - P8           |
| TC0400010284.hg.1 | TC0400010284.hg.1 | jorko.aAug10-<br>unspliced     | jorko      | NA       | 59.18 | 4.88 | 7.31 | 1.59 | ctrl - P10; P2 - ctrl; ctrl - P8; P11 - P10; P2 - P10; P3 - P10; P10 - P8; P2 - P11; P11 - P8; P2 - P3; P2 - P8; P3 - P8                        |
| TC1000007641.hg.1 | TC1000007641.hg.1 | NM_012242                      | DKK1       | 22943    | 59.13 | 4.90 | 7.30 | 1.59 | P10 - ctrl; P3 - ctrl; P8 - ctrl; P10 - P11; P10 - P2; P3 - P10; P8 - P10; P3 - P11; P8 - P11; P3 - P2; P8 - P2; P3 - P8                        |
| TC0600011491.hg.1 | TC0600011491.hg.1 | NM_002125                      | HLA-DRB5   | 3127     | 59.05 | 4.95 | 7.30 | 1.60 | P10 - ctrl; P8 - ctrl; P10 - P11; P10 - P2; P10 - P3; P8 - P11; P8 - P2; P8 - P3                                                                |
| TC0400008328.hg.1 | TC0400008328.hg.1 | teesnarby.aAug10-<br>unspliced | teesnarby  | NA       | 59.03 | 4.95 | 7.30 | 1.61 | ctrl - P10; ctrl - P11; ctrl - P3; ctrl - P8; P11 - P10; P2 - P10; P10 - P8; P2 - P11; P11 - P3; P11 - P8; P2 - P3; P2 - P8; P3 - P8            |
| TC0100010397.hg.1 | TC0100010397.hg.1 | NM_031423                      | NUF2       | 83540    | 58.97 | 4.98 | 7.30 | 1.61 | P10 - ctrl; ctrl - P2; P8 - ctrl; P10 - P11; P10 - P2; P10 - P3; P8 - P10; P3 - P11; P8 - P11; P3 - P2; P8 - P2; P8 - P3                        |
| TC0700007198.hg.1 | TC0700007198.hg.1 | NM_001284301                   | ANLN       | 54443    | 58.84 | 5.04 | 7.29 | 1.63 | P10 - ctrl; ctrl - P11; ctrl - P2; P8 - ctrl; P10 - P11; P10 - P2; P10 - P3; P8 - P10; P3 - P11; P8 - P11; P3 - P2; P8 - P2; P8 - P3            |
| TC0200012633.hg.1 | TC0200012633.hg.1 | seelar.aAug10-<br>unspliced    | seelar     | NA       | 58.80 | 5.06 | 7.29 | 1.63 | ctrl - P10; ctrl - P11; ctrl - P3; ctrl - P8; P11 - P10; P2 - P10; P10 - P8; P2 - P11; P11 - P3; P11 - P8; P2 - P3; P2 - P8; P3 - P8            |
| TC0200012281.hg.1 | TC0200012281.hg.1 | ENST00000450854.1              | AC009229.5 |          | 58.65 | 5.14 | 7.28 | 1.66 | ctrl - P10; P11 - ctrl; P3 - ctrl; ctrl - P8; P11 - P10; P2 - P10; P3 - P10; P11 - P2; P11 - P8; P3 - P2; P2 - P8; P3 - P8                      |
| TC0100015445.hg.1 | TC0100015445.hg.1 | NM_152380                      | TBX15      | 6913     | 58.55 | 5.19 | 7.28 | 1.67 | P10 - ctrl; ctrl - P11; P2 - ctrl; P3 - ctrl; P8 - ctrl; P10 - P11; P3 - P10; P8 - P10; P2 - P11; P3 - P11; P8 - P11; P3 - P2; P8 - P2          |
| TC0200013903.hg.1 | TC0200013903.hg.1 | teyder.aAug10-<br>unspliced    | teyder     | NA       | 58.49 | 5.22 | 7.28 | 1.68 | ctrl - P10; ctrl - P11; ctrl - P3; ctrl - P8; P11 - P10; P2 - P10; P3 - P10; P10 - P8; P2 - P11; P11 - P8; P2 - P3; P2 - P8; P3 - P8            |
| TC0X00008724.hg.1 | TC0X00008724.hg.1 | NM_001301228                   | HMGGB3     | 3149     | 58.58 | 5.28 | 7.27 | 1.70 | P10 - ctrl; P3 - ctrl; P8 - ctrl; P10 - P11; P10 - P2; P10 - P3; P3 - P11; P8 - P11; P3 - P2; P8 - P2; P8 - P3                                  |
| TC0900008442.hg.1 | TC0900008442.hg.1 | temore.aAug10-<br>unspliced    | temore     | NA       | 58.34 | 5.30 | 7.27 | 1.70 | ctrl - P10; ctrl - P11; P2 - ctrl; ctrl - P3; ctrl - P8; P2 - P10; P3 - P10; P2 - P11; P11 - P8; P2 - P3; P2 - P8; P3 - P8                      |
| TC1400010647.hg.1 | TC1400010647.hg.1 | NM_000623                      | BDKRB2     | 624      | 58.27 | 5.33 | 7.27 | 1.71 | ctrl - P10; ctrl - P11; ctrl - P2; ctrl - P3; P10 - P2; P10 - P3; P8 - P10; P11 - P2; P11 - P3; P8 - P11; P8 - P2; P8 - P3                      |
| TC1600010100.hg.1 | TC1600010100.hg.1 | NA                             | NA         | NA       | 58.26 | 5.34 | 7.27 | 1.71 | ctrl - P10; ctrl - P11; P2 - ctrl; ctrl - P3; ctrl - P8; P2 - P10; P3 - P10; P2 - P11; P3 - P11; P2 - P3; P2 - P8; P3 - P8                      |
| TC0100008101.hg.1 | TC0100008101.hg.1 | NM_001297655                   | KIF2C      | 11004    | 58.23 | 5.35 | 7.27 | 1.71 | P10 - ctrl; ctrl - P11; ctrl - P2; P8 - ctrl; P10 - P11; P10 - P2; P10 - P3; P8 - P10; P3 - P11; P8 - P11; P3 - P2; P8 - P2; P8 - P3            |
| TC0200013311.hg.1 | TC0200013311.hg.1 | NM_001164730                   | REEP1      | 65055    | 58.13 | 5.41 | 7.26 | 1.72 | P10 - ctrl; P11 - ctrl; P3 - ctrl; P8 - ctrl; P10 - P11; P10 - P2; P11 - P2; P3 - P11; P8 - P11; P3 - P2; P8 - P2; P8 - P3                      |
| TC1500006571.hg.1 | TC1500006571.hg.1 | NA                             | NA         | NA       | 58.13 | 5.41 | 7.26 | 1.72 | ctrl - P10; ctrl - P3; ctrl - P8; P11 - P10; P2 - P10; P3 - P10; P2 - P11; P11 - P3; P11 - P8; P2 - P3; P2 - P8; P3 - P8                        |
| TC0900011850.hg.1 | TC0900011850.hg.1 | NM_001145099                   | SLC2A6     | 11182    | 58.00 | 5.48 | 7.26 | 1.74 | P10 - ctrl; ctrl - P11; ctrl - P2; P3 - ctrl; P8 - ctrl; P10 - P11; P10 - P2; P10 - P3; P8 - P10; P3 - P11; P8 - P11; P3 - P2; P8 - P2; P8 - P3 |
| TC0800011129.hg.1 | TC0800011129.hg.1 | NM_001144663                   | CDH17      | 1015     | 57.95 | 5.50 | 7.25 | 1.75 | P10 - ctrl; P11 - ctrl; P2 - ctrl; P3 - ctrl; P8 - ctrl; P11 - P10; P10 - P2; P3 - P10; P11 - P2; P3 - P11; P11 - P8; P3 - P2; P8 - P2; P3 - P8 |
| TC0300013733.hg.1 | TC0300013733.hg.1 | NM_005929                      | MF12       | 4241     | 57.84 | 5.56 | 7.25 | 1.77 | P10 - ctrl; P11 - ctrl; P3 - ctrl; P8 - ctrl; P10 - P11; P10 - P2; P8 - P10; P11 - P2; P3 - P11; P8 - P11; P3 - P2; P8 - P2; P8 - P3            |
| TC0800009961.hg.1 | TC0800009961.hg.1 | NM_001831                      | CLU        | 1191     | 57.83 | 5.57 | 7.25 | 1.77 | P10 - ctrl; ctrl - P11; ctrl - P2; P3 - ctrl; P8 - ctrl; P10 - P11; P10 - P2; P3 - P10; P11 - P2; P3 - P11; P8 - P11; P3 - P2; P8 - P2; P3 - P8 |
| TC0X00008034.hg.1 | TC0X00008034.hg.1 | NM_198465                      | NRK        | 203447   | 57.78 | 5.60 | 7.25 | 1.77 | ctrl - P10; ctrl - P11; ctrl - P2; ctrl - P3; ctrl - P8; P11 - P10; P2 - P10; P3 - P10; P2 - P11; P3 - P11; P11 - P8; P3 - P2; P2 - P8; P3 - P8 |



|                               |                   |                                |               |       |             |              |            |              |                                                                                                                                                     |
|-------------------------------|-------------------|--------------------------------|---------------|-------|-------------|--------------|------------|--------------|-----------------------------------------------------------------------------------------------------------------------------------------------------|
| TC1200011246.hg.1             | TC1200011246.hg.1 | NM_001207015                   | PTPRR         | 5801  | 57.70<br>8  | 5.64<br>E-08 | 7.24<br>88 | 1.78<br>E-07 | P10 - ctrl; P11 - ctrl; P3 - ctrl; P8 - ctrl; P10 - P11; P10 - P2; P10 - P3; P3 - P11; P8 - P11; P3 - P2; P8 - P2; P8 - P3                          |
| TC1400009962.hg.1             | TC1400009962.hg.1 | ENST00000555853.1              | RP11-471B22.2 |       | 57.64<br>6  | 5.67<br>E-08 | 7.24<br>61 | 1.79<br>E-07 | P10 - ctrl; P11 - ctrl; P3 - ctrl; P8 - ctrl; P10 - P11; P10 - P2; P10 - P3; P11 - P2; P3 - P11; P8 - P11; P3 - P2; P8 - P2; P8 - P3                |
| TC1900011963.hg.1             | TC1900011963.hg.1 | NM_001031850                   | PSG6          | 5675  | 57.61<br>4  | 5.69<br>E-08 | 7.24<br>47 | 1.80<br>E-07 | P10 - ctrl; ctrl - P2; P3 - ctrl; P8 - ctrl; P10 - P11; P10 - P2; P11 - P2; P3 - P11; P8 - P11; P3 - P2; P8 - P2                                    |
| TC2100007810.hg.1             | TC2100007810.hg.1 | NA                             | NA            | NA    | 57.57<br>58 | 5.71<br>E-08 | 7.24<br>33 | 1.80<br>E-07 | ctrl - P10; ctrl - P11; P2 - ctrl; ctrl - P3; ctrl - P8; P2 - P10; P3 - P10; P2 - P11; P3 - P11; P11 - P8; P2 - P3; P2 - P8; P3 - P8                |
| TC0700010289.hg.1             | TC0700010289.hg.1 | NA                             | NA            | NA    | 57.53<br>6  | 5.74<br>E-08 | 7.24<br>14 | 1.81<br>E-07 | ctrl - P10; ctrl - P11; ctrl - P2; ctrl - P3; ctrl - P8; P11 - P10; P2 - P10; P3 - P10; P2 - P11; P11 - P3; P11 - P8; P2 - P3; P2 - P8; P3 - P8     |
| TC1000007704.hg.1             | TC1000007704.hg.1 | NA                             | NA            | NA    | 57.42<br>1  | 5.80<br>E-08 | 7.23<br>64 | 1.82<br>E-07 | ctrl - P10; ctrl - P11; P2 - ctrl; ctrl - P3; ctrl - P8; P2 - P10; P3 - P10; P2 - P11; P3 - P11; P2 - P3; P2 - P8; P3 - P8                          |
| TC1600007107.hg.1             | TC1600007107.hg.1 | NM_001105248                   | TMCS          | 79838 | 57.41<br>4  | 5.81<br>E-08 | 7.23<br>61 | 1.82<br>E-07 | P10 - ctrl; P2 - ctrl; P8 - ctrl; P10 - P11; P10 - P2; P10 - P3; P8 - P11; P8 - P2; P8 - P3                                                         |
| TC1900009970.hg.1             | TC1900009970.hg.1 | NM_004335                      | BST2          | 684   | 57.40<br>1  | 5.81<br>E-08 | 7.23<br>56 | 1.82<br>E-07 | ctrl - P11; ctrl - P2; P3 - ctrl; P8 - ctrl; P10 - P11; P10 - P2; P3 - P10; P8 - P10; P11 - P2; P3 - P11; P8 - P11; P3 - P2; P8 - P2                |
| TC0800009529.hg.1             | TC0800009529.hg.1 | NM_001201329                   | PPP1R3B       | 79660 | 57.40<br>4  | 5.81<br>E-08 | 7.23<br>55 | 1.82<br>E-07 | P10 - ctrl; ctrl - P2; P3 - ctrl; P8 - ctrl; P10 - P11; P10 - P2; P10 - P3; P10 - P8; P3 - P11; P8 - P11; P3 - P2; P8 - P2; P8 - P3                 |
| TC0700012787.hg.1             | TC0700012787.hg.1 | smeyperby.aAug10-<br>unspliced | smeyperby     | NA    | 57.36<br>5  | 5.83<br>E-08 | 7.23<br>4  | 1.82<br>E-07 | ctrl - P10; ctrl - P11; P2 - ctrl; ctrl - P3; ctrl - P8; P11 - P10; P2 - P10; P3 - P10; P8 - P2; P11; P3 - P11; P11 - P8; P2 - P3; P2 - P8; P3 - P8 |
| TC1800006602.hg.1             | TC1800006602.hg.1 | ENST00000608943.1              | RP11-376P6.3  |       | 57.33<br>3  | 5.85<br>E-08 | 7.23<br>26 | 1.83<br>E-07 | ctrl - P10; ctrl - P11; P2 - ctrl; ctrl - P3; ctrl - P8; P2 - P10; P3 - P10; P10 - P8; P2 - P11; P3 - P11; P2 - P3; P2 - P8; P3 - P8                |
| TC1100010410.hg.1             | TC1100010410.hg.1 | NM_001143805                   | BDNF          | 627   | 57.30<br>8  | 5.87<br>E-08 | 7.23<br>15 | 1.83<br>E-07 | P10 - ctrl; ctrl - P2; P3 - ctrl; P8 - ctrl; P10 - P11; P10 - P2; P10 - P3; P11 - P2; P3 - P11; P8 - P11; P3 - P2; P8 - P2; P8 - P3                 |
| TC0600008547.hg.1             | TC0600008547.hg.1 | ENST00000421318.1              | RP11-554D15.4 |       | 57.24<br>9  | 5.90<br>E-08 | 7.22<br>9  | 1.84<br>E-07 | P10 - ctrl; P2 - ctrl; P3 - ctrl; P8 - ctrl; P10 - P11; P10 - P3; P2 - P11; P3 - P11; P8 - P11; P2 - P3; P2 - P8; P8 - P3                           |
| TC1100011259.hg.1             | TC1100011259.hg.1 | NM_001300844                   | FOSL1         | 8061  | 57.18<br>6  | 5.94<br>E-08 | 7.22<br>63 | 1.85<br>E-07 | P10 - ctrl; ctrl - P2; P3 - ctrl; P8 - ctrl; P10 - P11; P10 - P2; P3 - P10; P8 - P10; P11 - P2; P3 - P11; P8 - P11; P3 - P2; P8 - P2                |
| TC0300012112.hg.1             | TC0300012112.hg.1 | NM_003778                      | B4GALT4       | 8702  | 57.15<br>3  | 5.96<br>E-08 | 7.22<br>48 | 1.85<br>E-07 | P10 - ctrl; ctrl - P11; P3 - ctrl; P8 - ctrl; P10 - P11; P10 - P2; P3 - P10; P8 - P10; P2 - P11; P3 - P11; P8 - P11; P3 - P2; P8 - P2               |
| TC0200014796.hg.1             | TC0200014796.hg.1 | kynorbo.aAug10-<br>unspliced   | kynorbo       | NA    | 57.14<br>9  | 5.96<br>E-08 | 7.22<br>46 | 1.85<br>E-07 | ctrl - P10; ctrl - P11; ctrl - P2; ctrl - P3; ctrl - P8; P11 - P10; P2 - P10; P10 - P8; P2 - P11; P11 - P8; P2 - P3; P2 - P8; P3 - P8               |
| TC0400009087.hg.1             | TC0400009087.hg.1 | skoyfley.aAug10-<br>unspliced  | skoyfley      | NA    | 57.11<br>6  | 5.98<br>E-08 | 7.22<br>32 | 1.85<br>E-07 | ctrl - P10; P2 - ctrl; ctrl - P3; ctrl - P8; P11 - P10; P2 - P10; P3 - P10; P2 - P11; P11 - P3; P11 - P8; P2 - P3; P2 - P8; P3 - P8                 |
| TC0800010275.hg.1             | TC0800010275.hg.1 | NM_000930                      | PLAT          | 5327  | 56.91<br>4  | 6.10<br>E-08 | 7.21<br>45 | 1.89<br>E-07 | P3 - ctrl; P8 - ctrl; P10 - P2; P3 - P10; P8 - P10; P3 - P11; P8 - P11; P3 - P2; P8 - P2; P3 - P8                                                   |
| TC1100010529.hg.1             | TC1100010529.hg.1 | NA                             | NA            | NA    | 56.82<br>7  | 6.16<br>E-08 | 7.21<br>07 | 1.90<br>E-07 | P10 - ctrl; P11 - ctrl; P3 - ctrl; P8 - ctrl; P10 - P11; P10 - P2; P3 - P11; P8 - P11; P3 - P2; P8 - P2                                             |
| TC1200008595.hg.1             | TC1200008595.hg.1 | NM_001206977                   | NR1H4         | 9971  | 57.71<br>6  | 6.23<br>E-08 | 7.20<br>58 | 1.92<br>E-07 | ctrl - P10; ctrl - P11; ctrl - P2; ctrl - P3; ctrl - P8; P11 - P10; P2 - P10; P3 - P10; P11 - P3; P11 - P8; P2 - P3; P2 - P8; P3 - P8               |
| HTA2-pos-<br>PSR02023979.hg.1 | 23151072          | NA                             | NA            | NA    | 56.57<br>8  | 6.31<br>E-08 | 7.19<br>98 | 1.95<br>E-07 | ctrl - P10; ctrl - P11; ctrl - P3; ctrl - P8; P11 - P10; P2 - P10; P3 - P10; P2 - P11; P11 - P8; P2 - P3; P2 - P8; P3 - P8                          |
| TC0200009402.hg.1             | TC0200009402.hg.1 | NM_002410                      | MGAT5         | 4249  | 56.53<br>7  | 6.34<br>E-08 | 7.19<br>8  | 1.95<br>E-07 | P10 - ctrl; P11 - ctrl; ctrl - P2; P3 - ctrl; P8 - ctrl; P10 - P11; P10 - P2; P10 - P3; P11 - P2; P3 - P11; P8 - P11; P3 - P2; P8 - P2; P8 - P3     |
| TC0400006887.hg.1             | TC0400006887.hg.1 | ENST00000508998.1              | RP11-281P23.2 |       | 56.46<br>1  | 6.39<br>E-08 | 7.19<br>46 | 1.97<br>E-07 | P10 - ctrl; P3 - ctrl; P8 - ctrl; P10 - P11; P10 - P2; P2 - P11; P3 - P11; P8 - P11; P3 - P2; P8 - P2; P3 - P8                                      |
| TC1500010617.hg.1             | TC1500010617.hg.1 | wopoy.aAug10-<br>unspliced     | wopoy         | NA    | 56.36<br>2  | 6.45<br>E-08 | 7.19<br>03 | 1.98<br>E-07 | ctrl - P10; ctrl - P11; ctrl - P3; ctrl - P8; P11 - P10; P2 - P10; P3 - P10; P2 - P11; P11 - P8; P2 - P3; P2 - P8; P3 - P8                          |
| TC0800011591.hg.1             | TC0800011591.hg.1 | snorla.aAug10-<br>unspliced    | snorla        | NA    | 56.15<br>7  | 6.59<br>E-08 | 7.18<br>13 | 2.02<br>E-07 | ctrl - P10; ctrl - P11; P2 - ctrl; ctrl - P3; ctrl - P8; P10 - P11; P2 - P10; P3 - P10; P10 - P8; P2 - P11; P3 - P11; P2 - P3; P2 - P8; P3 - P8     |
| TC1900007688.hg.1             | TC1900007688.hg.1 | NM_001238                      | CCNE1         | 898   | 56.07<br>9  | 6.64<br>E-08 | 7.17<br>78 | 2.03<br>E-07 | P10 - ctrl; ctrl - P11; ctrl - P2; P3 - ctrl; P8 - ctrl; P10 - P11; P10 - P2; P8 - P10; P3 - P11; P8 - P11; P3 - P2; P8 - P2; P8 - P3               |
| TC1900011112.hg.1             | TC1900011112.hg.1 | uc061ayc.1                     | AC026803.1    | NA    | 56.07<br>7  | 6.64<br>E-08 | 7.17<br>78 | 2.03<br>E-07 | P10 - ctrl; P11 - ctrl; ctrl - P2; P3 - ctrl; P8 - ctrl; P10 - P2; P10 - P8; P11 - P2; P11 - P8; P3 - P2; P8 - P2; P3 - P8                          |
| TC0300012137.hg.1             | TC0300012137.hg.1 | uc062mwe.1                     | AC092910.1    | NA    | 55.55<br>97 | 6.71<br>E-08 | 7.17<br>3  | 2.05<br>E-07 | ctrl - P10; ctrl - P11; P2 - ctrl; ctrl - P8; P11 - P10; P2 - P10; P3 - P10; P2 - P11; P3 - P11; P11 - P8; P2 - P3; P2 - P8; P3 - P8                |
| TC0500010847.hg.1             | TC0500010847.hg.1 | nypluby.aAug10-<br>unspliced   | nypluby       | NA    | 55.95<br>3  | 6.73<br>E-08 | 7.17<br>23 | 2.05<br>E-07 | ctrl - P10; ctrl - P3; ctrl - P8; P11 - P10; P2 - P10; P3 - P10; P11 - P8; P2 - P3; P2 - P8; P3 - P8                                                |
| TC1400007223.hg.1             | TC1400007223.hg.1 | cheyslor.aAug10-<br>unspliced  | cheyslor      | NA    | 55.64<br>2  | 6.94<br>E-08 | 7.15<br>85 | 2.12<br>E-07 | ctrl - P10; ctrl - P11; ctrl - P3; ctrl - P8; P2 - P10; P3 - P10; P10 - P8; P2 - P11; P3 - P11; P11 - P8; P2 - P3; P2 - P8; P3 - P8                 |
| TC0100009797.hg.1             | TC0100009797.hg.1 | blawda.aAug10                  | blawda        |       | 55.63<br>3  | 6.95<br>E-08 | 7.15<br>81 | 2.12<br>E-07 | ctrl - P10; P3 - ctrl; ctrl - P8; P11 - P10; P2 - P10; P3 - P10; P3 - P11; P11 - P8; P3 - P2; P2 - P8; P3 - P8                                      |
| TC1200012616.hg.1             | TC1200012616.hg.1 | NA                             | NA            | NA    | 55.58<br>7  | 6.98<br>E-08 | 7.15<br>6  | 2.13<br>E-07 | ctrl - P10; ctrl - P11; P2 - ctrl; ctrl - P3; ctrl - P8; P2 - P10; P3 - P10; P2 - P11; P11 - P8; P2 - P3; P2 - P8; P3 - P8                          |
| TC0100007645.hg.1             | TC0100007645.hg.1 | NM_001204414                   | TINAGL1       | 64129 | 55.57<br>6  | 6.99<br>E-08 | 7.15<br>55 | 2.13<br>E-07 | P10 - ctrl; ctrl - P2; P3 - ctrl; P8 - ctrl; P10 - P11; P10 - P2; P8 - P10; P11 - P2; P3 - P11; P8 - P11; P3 - P2; P8 - P2; P8 - P3                 |

|                   |                   |                                  |               |        |                  |            |              |              |                                                                                                                                                 |
|-------------------|-------------------|----------------------------------|---------------|--------|------------------|------------|--------------|--------------|-------------------------------------------------------------------------------------------------------------------------------------------------|
| TC0100007746.hg.1 | TC0100007746.hg.1 | NM_153212                        | GJB4          | 127534 | 55.44<br>5 E-08  | 7.08<br>97 | 7.14<br>E-07 | 2.15<br>E-07 | P10 - ctrl; P3 - ctrl; P8 - ctrl; P10 - P11; P10 - P2; P11 - P2; P3 - P11; P8 - P11; P3 - P2; P8 - P2                                           |
| TC0X00010076.hg.1 | TC0X00010076.hg.1 | teti.aAug10-<br>unspliced        | teti          | NA     | 55.40<br>7 E-08  | 7.11<br>8  | 7.14<br>E-07 | 2.16<br>E-07 | ctrl - P10; ctrl - P11; P2 - ctrl; P3 - ctrl; ctrl - P8; P2 - P10; P3 - P10; P10 - P8; P2 - P11; P3 - P11; P11 - P8; P2 - P3; P2 - P8; P3 - P8  |
| TC0900010664.hg.1 | TC0900010664.hg.1 | NA                               | NA            | NA     | 55.26<br>5 E-08  | 7.22<br>18 | 7.14<br>E-07 | 2.19<br>E-07 | P10 - ctrl; P3 - ctrl; P8 - ctrl; P10 - P11; P10 - P2; P10 - P3; P2 - P11; P3 - P11; P8 - P11; P3 - P2; P8 - P2; P8 - P3                        |
| TC0700012107.hg.1 | TC0700012107.hg.1 | feysmeebu.aAug10-<br>unspliced   | feysmeebu     | NA     | 55.24<br>3 E-08  | 7.23<br>07 | 7.14<br>E-07 | 2.19<br>E-07 | ctrl - P10; ctrl - P11; P2 - ctrl; ctrl - P3; ctrl - P8; P2 - P10; P3 - P10; P10 - P8; P2 - P11; P11 - P8; P2 - P3; P2 - P8; P3 - P8            |
| TC0700008624.hg.1 | TC0700008624.hg.1 | NA                               | NA            | NA     | 55.21<br>1 E-08  | 7.26<br>92 | 7.13<br>E-07 | 2.19<br>E-07 | ctrl - P10; ctrl - P11; ctrl - P3; ctrl - P8; P11 - P10; P2 - P10; P3 - P10; P2 - P11; P3 - P11; P11 - P8; P2 - P3; P2 - P8; P3 - P8            |
| TC2000007938.hg.1 | TC2000007938.hg.1 | gleytu.aAug10-<br>unspliced      | gleytu        | NA     | 55.03<br>9 E-08  | 7.39<br>15 | 7.13<br>E-07 | 2.23<br>E-07 | ctrl - P10; ctrl - P11; ctrl - P3; ctrl - P8; P11 - P10; P2 - P10; P3 - P10; P10 - P8; P2 - P11; P11 - P3; P11 - P8; P2 - P3; P2 - P8; P3 - P8  |
| TC0700009352.hg.1 | TC0700009352.hg.1 | NM_001061                        | TBXAS1        | 6916   | 54.98<br>7 E-08  | 7.43<br>92 | 7.12<br>E-07 | 2.24<br>E-07 | P10 - ctrl; P3 - ctrl; P8 - ctrl; P10 - P11; P10 - P2; P3 - P10; P3 - P11; P8 - P11; P3 - P2; P8 - P2; P3 - P8                                  |
| TC1000008482.hg.1 | TC1000008482.hg.1 | NM_001127182                     | CEP55         | 55165  | 54.98<br>4 E-08  | 7.43<br>9  | 7.12<br>E-07 | 2.24<br>E-07 | P10 - ctrl; ctrl - P11; ctrl - P2; P8 - ctrl; P10 - P11; P10 - P2; P10 - P3; P8 - P10; P3 - P11; P8 - P11; P3 - P2; P8 - P2; P8 - P3            |
| TC0300006465.hg.1 | TC0300006465.hg.1 | NM_020873                        | LRRN1         | 57633  | 54.96<br>3 E-08  | 7.45<br>81 | 7.12<br>E-07 | 2.24<br>E-07 | ctrl - P11; ctrl - P2; P3 - ctrl; P8 - ctrl; P10 - P11; P10 - P2; P3 - P10; P8 - P10; P3 - P11; P8 - P11; P3 - P2; P8 - P2                      |
| TC1600008159.hg.1 | TC1600008159.hg.1 | NM_000196                        | HSD11B2       | 3291   | 54.95<br>1 E-08  | 7.46<br>75 | 7.12<br>E-07 | 2.24<br>E-07 | ctrl - P10; P11 - ctrl; ctrl - P2; ctrl - P3; ctrl - P8; P11 - P10; P11 - P2; P11 - P3; P11 - P8                                                |
| TC1000012052.hg.1 | TC1000012052.hg.1 | moysyu.aAug10-<br>unspliced      | moysyu        |        | 54.92<br>4 E-08  | 7.48<br>63 | 7.12<br>E-07 | 2.24<br>E-07 | ctrl - P10; ctrl - P11; ctrl - P3; ctrl - P8; P11 - P10; P2 - P10; P2 - P11; P11 - P3; P11 - P8; P2 - P3; P2 - P8                               |
| TC0600011057.hg.1 | TC0600011057.hg.1 | NA                               | NA            | NA     | 54.91<br>8 E-08  | 7.48<br>61 | 7.12<br>E-07 | 2.24<br>E-07 | ctrl - P10; ctrl - P11; P2 - ctrl; ctrl - P3; ctrl - P8; P11 - P10; P2 - P10; P3 - P10; P10 - P8; P2 - P11; P11 - P8; P2 - P3; P2 - P8; P3 - P8 |
| TC0300013844.hg.1 | TC0300013844.hg.1 | NA                               | NA            | NA     | 54.74<br>9 E-08  | 7.49<br>53 | 7.12<br>E-07 | 2.24<br>E-07 | ctrl - P10; ctrl - P2; ctrl - P3; ctrl - P8; P11 - P10; P2 - P10; P11 - P2; P11 - P3; P11 - P8; P2 - P3; P2 - P8                                |
| TC0800011717.hg.1 | TC0800011717.hg.1 | shofarby.aAug10-<br>unspliced    | shofarby      | NA     | 54.82<br>8 E-08  | 7.55<br>2  | 7.12<br>E-07 | 2.26<br>E-07 | ctrl - P10; ctrl - P11; P2 - ctrl; ctrl - P8; P11 - P10; P2 - P10; P3 - P10; P2 - P11; P11 - P8; P2 - P3; P2 - P8; P3 - P8                      |
| TC0100013700.hg.1 | TC0100013700.hg.1 | NM_001190481                     | CLSPN         | 63967  | 54.76<br>4 E-08  | 7.60<br>91 | 7.11<br>E-07 | 2.27<br>E-07 | P10 - ctrl; ctrl - P11; P3 - ctrl; P8 - ctrl; P10 - P11; P10 - P2; P8 - P10; P2 - P11; P3 - P11; P8 - P11; P3 - P2; P8 - P2; P8 - P3            |
| TC1600009922.hg.1 | TC1600009922.hg.1 | NA                               | NA            | NA     | 54.73<br>7 E-08  | 7.63<br>76 | 7.11<br>E-07 | 2.27<br>E-07 | ctrl - P10; ctrl - P11; P2 - ctrl; ctrl - P3; ctrl - P8; P11 - P10; P2 - P10; P3 - P10; P10 - P8; P2 - P11; P11 - P8; P2 - P3; P2 - P8; P3 - P8 |
| TC1800007014.hg.1 | TC1800007014.hg.1 | NM_001943                        | DSG2          | 1829   | 54.68<br>9 E-08  | 7.66<br>57 | 7.11<br>E-07 | 2.28<br>E-07 | P10 - ctrl; P3 - ctrl; P8 - ctrl; P10 - P11; P10 - P2; P10 - P3; P11 - P2; P3 - P11; P8 - P11; P3 - P2; P8 - P2; P8 - P3                        |
| TC0600013884.hg.1 | TC0600013884.hg.1 | glawnsnerbu.aAug10-<br>unspliced | glawnsnerbu   | NA     | 54.66<br>6 E-08  | 7.68<br>47 | 7.11<br>E-07 | 2.28<br>E-07 | ctrl - P10; ctrl - P11; ctrl - P2; ctrl - P3; ctrl - P8; P11 - P10; P2 - P10; P3 - P10; P10 - P8; P11 - P3; P11 - P8; P2 - P3; P2 - P8; P3 - P8 |
| TC0400007556.hg.1 | TC0400007556.hg.1 | NM_024592                        | SRD5A3        | 79644  | 54.38<br>5 E-08  | 7.91<br>19 | 7.10<br>E-07 | 2.35<br>E-07 | P10 - ctrl; ctrl - P2; P8 - ctrl; P10 - P11; P10 - P2; P10 - P3; P11 - P2; P8 - P11; P3 - P2; P8 - P2; P8 - P3                                  |
| TC0200007098.hg.1 | TC0200007098.hg.1 | ENST00000605056.1                | RP11-373D23.3 |        | 54.32<br>5 E-08  | 7.96<br>92 | 7.09<br>E-07 | 2.36<br>E-07 | P10 - ctrl; ctrl - P11; P3 - ctrl; P8 - ctrl; P10 - P11; P10 - P2; P2 - P11; P3 - P11; P8 - P11; P3 - P2; P8 - P2                               |
| TC1700010790.hg.1 | TC1700010790.hg.1 | NM_001079675                     | ETV4          | 2118   | 54.30<br>1 E-08  | 7.98<br>81 | 7.09<br>E-07 | 2.37<br>E-07 | P10 - ctrl; P11 - ctrl; ctrl - P2; P3 - ctrl; P8 - ctrl; P10 - P2; P3 - P10; P8 - P10; P11 - P2; P3 - P11; P8 - P11; P3 - P2; P8 - P2           |
| TC0600008670.hg.1 | TC0600008670.hg.1 | NM_001170423                     | PRSS35        | 167681 | 54.17<br>6 E-08  | 8.08<br>24 | 7.09<br>E-07 | 2.39<br>E-07 | ctrl - P11; ctrl - P2; ctrl - P3; ctrl - P8; P10 - P11; P10 - P2; P10 - P3; P10 - P8; P11 - P2; P11 - P3; P11 - P8; P8 - P3                     |
| TC0600011124.hg.1 | TC0600011124.hg.1 | NM_003537                        | HIST1H3B      | 8358   | 53.75<br>8 E-08  | 8.45<br>33 | 7.07<br>E-07 | 2.50<br>E-07 | P10 - ctrl; ctrl - P2; P3 - ctrl; P8 - ctrl; P10 - P11; P10 - P2; P10 - P3; P3 - P11; P8 - P11; P3 - P2; P8 - P2; P8 - P3                       |
| TC0200011192.hg.1 | TC0200011192.hg.1 | skydu.aAug10-<br>unspliced       | skydu         | NA     | 53.64<br>9 E-08  | 8.55<br>83 | 7.06<br>E-07 | 2.52<br>E-07 | ctrl - P10; ctrl - P11; ctrl - P3; ctrl - P8; P11 - P10; P2 - P10; P3 - P10; P10 - P8; P2 - P11; P11 - P8; P2 - P3; P2 - P8; P3 - P8            |
| TC0X00010958.hg.1 | TC0X00010958.hg.1 | skeeler.aAug10-<br>unspliced     | skeeler       | NA     | 53.59<br>7 E-08  | 8.59<br>59 | 7.06<br>E-07 | 2.54<br>E-07 | ctrl - P10; ctrl - P3; ctrl - P8; P11 - P10; P2 - P10; P11 - P3; P11 - P8; P2 - P3; P2 - P8; P3 - P8                                            |
| TC1600008993.hg.1 | TC1600008993.hg.1 | stozubu.aAug10-<br>unspliced     | stozubu       | NA     | 53.56<br>6 E-08  | 8.62<br>44 | 7.06<br>E-07 | 2.54<br>E-07 | ctrl - P10; ctrl - P11; ctrl - P3; ctrl - P8; P11 - P10; P2 - P10; P3 - P10; P10 - P8; P2 - P11; P11 - P3; P11 - P8; P2 - P3; P2 - P8; P3 - P8  |
| TC0300006545.hg.1 | TC0300006545.hg.1 | fudawbo.aAug10-<br>unspliced     | fudawbo       | NA     | 53.54<br>6 E-08  | 8.64<br>35 | 7.06<br>E-07 | 2.54<br>E-07 | ctrl - P10; ctrl - P11; P2 - ctrl; ctrl - P3; ctrl - P8; P2 - P10; P3 - P10; P2 - P11; P3 - P11; P11 - P8; P2 - P3; P2 - P8; P3 - P8            |
| TC0700012551.hg.1 | TC0700012551.hg.1 | ENST00000469533                  | RP11-309L24.6 | NA     | 53.37<br>5 E-08  | 8.80<br>56 | 7.05<br>E-07 | 2.59<br>E-07 | P10 - ctrl; P3 - ctrl; P8 - ctrl; P10 - P11; P10 - P2; P8 - P10; P2 - P11; P3 - P11; P8 - P11; P3 - P2; P8 - P2; P8 - P3                        |
| TC0200014798.hg.1 | TC0200014798.hg.1 | NA                               | NA            | NA     | 53.35<br>5 E-08  | 8.82<br>47 | 7.05<br>E-07 | 2.59<br>E-07 | ctrl - P10; ctrl - P11; ctrl - P3; ctrl - P8; P2 - P10; P10 - P8; P2 - P11; P11 - P8; P2 - P3; P2 - P8; P3 - P8                                 |
| TC0900008504.hg.1 | TC0900008504.hg.1 | NM_032888                        | COL27A1       | 85301  | 53.22<br>2 E-08  | 8.94<br>85 | 7.04<br>E-07 | 2.62<br>E-07 | ctrl - P10; ctrl - P11; ctrl - P3; ctrl - P8; P11 - P10; P2 - P10; P3 - P10; P2 - P11; P11 - P3; P11 - P8; P2 - P3; P2 - P8; P3 - P8            |
| TC0X00009069.hg.1 | TC0X00009069.hg.1 | NM_001287242                     | ARHGAP6       | 395    | 53.16<br>1 E-08  | 9.00<br>57 | 7.04<br>E-07 | 2.64<br>E-07 | ctrl - P10; ctrl - P2; ctrl - P3; ctrl - P8; P11 - P10; P2 - P10; P3 - P10; P11 - P2; P11 - P3; P11 - P8; P2 - P8; P3 - P8                      |
| TC1000008347.hg.1 | TC1000008347.hg.1 | taklarbu.aAug10-<br>unspliced    | taklarbu      | NA     | 52.98<br>5 E-08  | 9.17<br>75 | 7.03<br>E-07 | 2.68<br>E-07 | ctrl - P10; ctrl - P11; P2 - ctrl; ctrl - P3; ctrl - P8; P11 - P10; P2 - P10; P3 - P10; P10 - P8; P2 - P11; P11 - P8; P2 - P3; P2 - P8; P3 - P8 |
| TC0600011058.hg.1 | TC0600011058.hg.1 | NA                               | NA            | NA     | 52.98<br>98 E-08 | 7.03<br>73 | 7.03<br>E-07 | 2.68<br>E-07 | ctrl - P10; ctrl - P11; P2 - ctrl; ctrl - P3; ctrl - P8; P2 - P10; P10 - P8; P2 - P11; P11 - P8; P2 - P3; P2 - P8; P3 - P8                      |

|                   |                   |                               |               |          |                |              |            |              |                                                                                                                                                  |
|-------------------|-------------------|-------------------------------|---------------|----------|----------------|--------------|------------|--------------|--------------------------------------------------------------------------------------------------------------------------------------------------|
| TC0500011010.hg.1 | TC0500011010.hg.1 | bystawbu.aAug10-<br>unspliced | bystawbu      | NA       | 52.<br>86<br>6 | 9.29<br>E-08 | 7.03<br>19 | 2.71<br>E-07 | ctrl - P10; ctrl - P11; ctrl - P3; ctrl - P8; P11 - P10; P2 - P10; P3 - P10; P10 - P8; P2 - P11; P11 - P8; P2 - P3; P2 - P8; P3 - P8             |
| TC0500010852.hg.1 | TC0500010852.hg.1 | kufliu.bAug10-<br>unspliced   | kufliu        | NA       | 52.<br>80<br>3 | 9.35<br>E-08 | 7.02<br>9  | 2.73<br>E-07 | ctrl - P10; P3 - ctrl; ctrl - P8; P11 - P10; P2 - P10; P3 - P10; P3 - P11; P11 - P8; P3 - P2; P2 - P8; P3 - P8                                   |
| TC1700009422.hg.1 | TC1700009422.hg.1 | ENST00000623339               | RP11-667K14.9 |          | 52.<br>78<br>3 | 9.37<br>E-07 | 7.02<br>81 | 2.73<br>E-07 | ctrl - P10; ctrl - P11; P2 - ctrl; ctrl - P3; ctrl - P8; P2 - P10; P3 - P10; P2 - P11; P11 - P8; P2 - P3; P2 - P8; P3 - P8                       |
| TC1300007796.hg.1 | TC1300007796.hg.1 | ENST00000595998.1             | RP11-573N10.1 |          | 52.<br>73<br>5 | 9.42<br>E-08 | 7.02<br>59 | 2.74<br>E-07 | ctrl - P10; ctrl - P11; P2 - ctrl; ctrl - P3; ctrl - P8; P2 - P10; P10 - P8; P2 - P11; P3 - P11; P11 - P8; P2 - P3; P2 - P8; P3 - P8             |
| TC0100007747.hg.1 | TC0100007747.hg.1 | NM_001005752                  | GJB3          | 2707     | 52.<br>58<br>3 | 9.58<br>E-08 | 7.01<br>87 | 2.78<br>E-07 | P10 - ctrl; P3 - ctrl; P8 - ctrl; P10 - P11; P10 - P2; P3 - P11; P8 - P11; P3 - P2; P8 - P2                                                      |
| TC0100012675.hg.1 | TC0100012675.hg.1 | NM_007274                     | ACOT7         | 11332    | 52.<br>45<br>3 | 9.71<br>E-08 | 7.01<br>28 | 2.82<br>E-07 | P10 - ctrl; ctrl - P2; P3 - ctrl; P8 - ctrl; P10 - P11; P10 - P2; P3 - P10; P8 - P10; P11 - P2; P3 - P11; P8 - P11; P3 - P2; P8 - P2             |
| TC0200015620.hg.1 | TC0200015620.hg.1 | tuha.aAug10-<br>unspliced     | tuha          | NA       | 52.<br>38<br>9 | 9.78<br>E-08 | 7.00<br>96 | 2.84<br>E-07 | ctrl - P10; ctrl - P3; ctrl - P8; P11 - P10; P2 - P10; P10 - P3; P10 - P8; P11 - P3; P11 - P8; P2 - P3; P2 - P8                                  |
| TC0100013498.hg.1 | TC0100013498.hg.1 | ENST00000611385               | uc_338        |          | 52.<br>35<br>5 | 9.82<br>E-08 | 7.00<br>8  | 2.84<br>E-07 | ctrl - P10; ctrl - P11; P2 - ctrl; ctrl - P3; ctrl - P8; P2 - P10; P3 - P10; P10 - P8; P2 - P11; P11 - P8; P2 - P3; P2 - P8; P3 - P8             |
| TC1500006963.hg.1 | TC1500006963.hg.1 | NM_144508                     | CASC5         | 57082    | 52.<br>31<br>9 | 9.86<br>E-08 | 7.00<br>63 | 2.85<br>E-07 | P10 - ctrl; ctrl - P11; ctrl - P2; P3 - ctrl; P8 - ctrl; P10 - P11; P10 - P2; P10 - P3; P8 - P10; P3 - P11; P8 - P11; P3 - P2; P8 - P2; P8 - P3  |
| TC0200008000.hg.1 | TC0200008000.hg.1 | roydawbu.aAug10-<br>unspliced | roydawbu      | NA       | 52.<br>18<br>7 | 1.00<br>E-07 | 7.00<br>01 | 2.89<br>E-07 | ctrl - P10; ctrl - P3; ctrl - P8; P11 - P10; P2 - P10; P3 - P10; P2 - P11; P11 - P3; P11 - P8; P2 - P3; P2 - P8; P3 - P8                         |
| TC0600014184.hg.1 | TC0600014184.hg.1 | smufia.aAug10                 | smufia        | NA       | 52.<br>10<br>7 | 1.01<br>E-07 | 6.99<br>63 | 2.91<br>E-07 | P10 - ctrl; P11 - ctrl; P2 - ctrl; P3 - ctrl; P8 - ctrl; P10 - P11; P10 - P2; P10 - P3; P2 - P11; P8 - P11; P2 - P3; P8 - P2; P8 - P3            |
| TC0200010625.hg.1 | TC0200010625.hg.1 | tikore.aAug10-<br>unspliced   | tikore        | NA       | 51.<br>84<br>5 | 1.04<br>E-07 | 6.98<br>39 | 2.99<br>E-07 | ctrl - P10; ctrl - P11; ctrl - P3; ctrl - P8; P11 - P10; P2 - P10; P3 - P10; P10 - P8; P2 - P11; P11 - P8; P2 - P3; P2 - P8; P3 - P8             |
| TC0700013385.hg.1 | TC0700013385.hg.1 | NR_108104                     | LINC01372     | 1.02E+08 | 51.<br>81<br>6 | 1.04<br>E-07 | 6.98<br>25 | 3.00<br>E-07 | ctrl - P10; ctrl - P11; ctrl - P3; ctrl - P8; P11 - P10; P2 - P10; P2 - P11; P11 - P8; P2 - P3; P2 - P8; P3 - P8                                 |
| TC1900011419.hg.1 | TC1900011419.hg.1 | NA                            | NA            | NA       | 51.<br>77<br>7 | 1.05<br>E-07 | 6.98<br>03 | 3.01<br>E-07 | ctrl - P10; ctrl - P11; P2 - ctrl; ctrl - P3; ctrl - P8; P11 - P10; P2 - P10; P3 - P10; P10 - P8; P2 - P11; P11 - P8; P2 - P3; P2 - P8; P3 - P8  |
| TC1100010105.hg.1 | TC1100010105.hg.1 | NM_198516                     | GALNT18       | 374378   | 51.<br>75<br>8 | 1.05<br>E-07 | 6.97<br>97 | 3.01<br>E-07 | ctrl - P10; ctrl - P2; ctrl - P3; ctrl - P8; P11 - P10; P3 - P10; P11 - P2; P11 - P3; P11 - P8; P3 - P2; P2 - P8; P3 - P8                        |
| TC1700008757.hg.1 | TC1700008757.hg.1 | NM_002758                     | MAP2K6        | 5608     | 51.<br>71<br>9 | 1.05<br>E-07 | 6.97<br>79 | 3.02<br>E-07 | ctrl - P10; ctrl - P11; ctrl - P2; ctrl - P3; ctrl - P8; P11 - P10; P2 - P10; P3 - P10; P8 - P10; P11 - P2; P11 - P3; P11 - P8; P2 - P8; P3 - P8 |
| TC0600014307.hg.1 | TC0600014307.hg.1 | ENST00000625013               | RP3-331H24.7  |          | 51.<br>60<br>9 | 1.07<br>E-07 | 6.97<br>26 | 3.05<br>E-07 | ctrl - P10; ctrl - P11; P2 - ctrl; ctrl - P3; ctrl - P8; P10 - P11; P2 - P10; P10 - P8; P2 - P11; P3 - P11; P2 - P3; P2 - P8; P3 - P8            |
| TC1400007201.hg.1 | TC1400007201.hg.1 | NM_001130851                  | CDKN3         | 1033     | 51.<br>58<br>9 | 1.07<br>E-07 | 6.97<br>17 | 3.06<br>E-07 | P10 - ctrl; ctrl - P2; P8 - ctrl; P10 - P11; P10 - P2; P10 - P3; P8 - P10; P11 - P2; P3 - P11; P8 - P11; P3 - P2; P8 - P2; P8 - P3               |
| TC0200011062.hg.1 | TC0200011062.hg.1 | NM_145236                     | B3GNT7        | 93010    | 51.<br>57<br>7 | 1.07<br>E-07 | 6.97<br>11 | 3.06<br>E-07 | P10 - ctrl; P11 - ctrl; P3 - ctrl; P8 - ctrl; P10 - P11; P10 - P2; P10 - P3; P8 - P10; P11 - P2; P8 - P11; P3 - P2; P8 - P2; P8 - P3             |
| TC0X00009075.hg.1 | TC0X00009075.hg.1 | NA                            | NA            | NA       | 51.<br>53<br>4 | 1.07<br>E-07 | 6.96<br>9  | 3.07<br>E-07 | ctrl - P10; ctrl - P11; ctrl - P3; ctrl - P8; P11 - P10; P2 - P10; P3 - P10; P2 - P11; P11 - P3; P11 - P8; P2 - P3; P2 - P8; P3 - P8             |
| TC1600010849.hg.1 | TC1600010849.hg.1 | ploserbo.aAug10-<br>unspliced | ploserbo      | NA       | 51.<br>49<br>8 | 1.08<br>E-07 | 6.96<br>73 | 3.08<br>E-07 | ctrl - P10; ctrl - P11; ctrl - P3; ctrl - P8; P11 - P10; P2 - P10; P3 - P10; P2 - P11; P11 - P8; P2 - P3; P2 - P8; P3 - P8                       |
| TC0800007367.hg.1 | TC0800007367.hg.1 | NM_003816                     | ADAM9         | 8754     | 51.<br>48<br>4 | 1.08<br>E-07 | 6.96<br>66 | 3.08<br>E-07 | P10 - ctrl; ctrl - P11; P8 - ctrl; P10 - P11; P10 - P2; P10 - P3; P3 - P11; P8 - P11; P3 - P2; P8 - P2; P8 - P3                                  |
| TC0200014703.hg.1 | TC0200014703.hg.1 | NM_001301684                  | CCDC148       | 130940   | 51.<br>45<br>9 | 1.08<br>E-07 | 6.96<br>54 | 3.08<br>E-07 | ctrl - P10; ctrl - P3; ctrl - P8; P11 - P10; P2 - P10; P3 - P10; P11 - P3; P11 - P8; P2 - P3; P2 - P8; P3 - P8                                   |
| TC2100006627.hg.1 | TC2100006627.hg.1 | NR_027790                     | MIR99AHG      | 388815   | 51.<br>37<br>3 | 1.09<br>E-07 | 6.96<br>13 | 3.11<br>E-07 | ctrl - P10; ctrl - P11; ctrl - P2; ctrl - P3; ctrl - P8; P11 - P10; P2 - P10; P3 - P10; P11 - P2; P11 - P3; P11 - P8; P2 - P3; P2 - P8           |
| TC0200012339.hg.1 | TC0200012339.hg.1 | NM_001112800                  | SLC8A1        | 2p22.1   | 51.<br>35<br>8 | 1.10<br>E-07 | 6.96<br>06 | 3.11<br>E-07 | P10 - ctrl; P11 - ctrl; P2 - ctrl; P8 - ctrl; P10 - P11; P10 - P2; P10 - P3; P10 - P8; P2 - P11; P11 - P3; P8 - P11; P2 - P3; P8 - P3            |
| TC1100009110.hg.1 | TC1100009110.hg.1 | NM_006169                     | NNMT          | 4837     | 51.<br>32<br>3 | 1.10<br>E-07 | 6.95<br>89 | 3.12<br>E-07 | P10 - ctrl; P3 - ctrl; P8 - ctrl; P10 - P11; P10 - P2; P3 - P11; P8 - P11; P3 - P2; P8 - P2                                                      |
| TC0500009863.hg.1 | TC0500009863.hg.1 | NM_024830                     | LPCAT1        | 79888    | 51.<br>20<br>9 | 1.11<br>E-07 | 6.95<br>34 | 3.15<br>E-07 | P10 - ctrl; ctrl - P2; P3 - ctrl; P8 - ctrl; P10 - P11; P10 - P2; P8 - P10; P11 - P2; P3 - P11; P8 - P11; P3 - P2; P8 - P2                       |
| TC1000008388.hg.1 | TC1000008388.hg.1 | NM_000043                     | FAS           | 355      | 51.<br>18<br>7 | 1.12<br>E-07 | 6.95<br>24 | 3.16<br>E-07 | P10 - ctrl; ctrl - P2; P3 - ctrl; P8 - ctrl; P10 - P11; P10 - P2; P3 - P11; P8 - P11; P3 - P2; P8 - P2                                           |
| TC0900007129.hg.1 | TC0900007129.hg.1 | NM_001256685                  | MELK          | 9833     | 50.<br>96<br>9 | 1.14<br>E-07 | 6.94<br>18 | 3.23<br>E-07 | P10 - ctrl; ctrl - P11; ctrl - P2; P3 - ctrl; P8 - ctrl; P10 - P11; P10 - P2; P8 - P10; P3 - P11; P8 - P11; P3 - P2; P8 - P2; P8 - P3            |
| TC1600008235.hg.1 | TC1600008235.hg.1 | OTTHUMT00000474147            | RP11-140H17.2 |          | 50.<br>92<br>5 | 1.15<br>E-07 | 6.93<br>97 | 3.24<br>E-07 | ctrl - P10; ctrl - P11; P2 - ctrl; ctrl - P3; ctrl - P8; P11 - P10; P2 - P10; P3 - P10; P2 - P11; P11 - P8; P2 - P3; P2 - P8; P3 - P8            |
| TC0200014766.hg.1 | TC0200014766.hg.1 | wadey.aAug10-<br>unspliced    | wadey         | NA       | 50.<br>90<br>9 | 1.15<br>E-07 | 6.93<br>9  | 3.25<br>E-07 | ctrl - P10; ctrl - P8; P11 - P10; P2 - P10; P3 - P10; P10 - P8; P11 - P8; P2 - P8; P3 - P8                                                       |
| TC0600011144.hg.1 | TC0600011144.hg.1 | NA                            | NA            | NA       | 50.<br>80<br>4 | 1.16<br>E-07 | 6.93<br>38 | 3.28<br>E-07 | P10 - ctrl; P3 - ctrl; P8 - ctrl; P10 - P11; P10 - P2; P3 - P10; P11 - P2; P3 - P11; P8 - P11; P3 - P2; P8 - P2                                  |

|                         |                         |                           |                   |         |       |      |      |      |                                                                                                                                                 |
|-------------------------|-------------------------|---------------------------|-------------------|---------|-------|------|------|------|-------------------------------------------------------------------------------------------------------------------------------------------------|
| TC0500013323.hg.1       | TC0500013323.hg.1       | hsa_circ_0072870          | TCONS_l2_00023773 |         | 50.77 | 1.17 | 6.93 | 3.29 | ctrl - P10; ctrl - P11; ctrl - P3; ctrl - P8; P11 - P10; P2 - P10; P3 - P10; P2 - P11; P11 - P8; P2 - P3; P2 - P8; P3 - P8                      |
| TC0200015645.hg.1       | TC0200015645.hg.1       | NM_015657                 | ABCA12            | 26154   | 50.72 | 1.18 | 6.92 | 3.30 | P11 - ctrl; ctrl - P2; P3 - ctrl; P8 - ctrl; P11 - P10; P10 - P2; P3 - P10; P8 - P10; P11 - P2; P11 - P8; P3 - P2; P8 - P2; P3 - P8             |
| TC0200009071.hg.1       | TC0200009071.hg.1       | NM_001271049              | CFAP221           | 200373  | 50.62 | 1.19 | 6.92 | 3.34 | ctrl - P10; ctrl - P2; ctrl - P3; ctrl - P8; P11 - P10; P2 - P10; P10 - P3; P10 - P8; P11 - P2; P11 - P3; P11 - P8; P2 - P3; P2 - P8            |
| TSUnmapped00000284.hg.1 | TSUnmapped00000284.hg.1 | ENST00000628182           | LRP6              | 4040    | 50.58 | 1.19 | 6.92 | 3.35 | ctrl - P10; ctrl - P2; ctrl - P3; ctrl - P8; P11 - P10; P2 - P10; P8 - P10; P11 - P3; P11 - P8; P2 - P3; P2 - P8; P8 - P3                       |
| TC0300011868.hg.1       | TC0300011868.hg.1       | NA                        | NA                | NA      | 50.50 | 1.20 | 6.91 | 3.37 | P10 - ctrl; P2 - ctrl; P3 - ctrl; P8 - ctrl; P10 - P11; P10 - P2; P10 - P3; P10 - P8; P2 - P11; P3 - P11; P8 - P11; P8 - P2; P8 - P3            |
| TC2000006675.hg.1       | TC2000006675.hg.1       | swywar.aAug10-unspliced   | swywar            | NA      | 50.50 | 1.20 | 6.91 | 3.37 | ctrl - P10; ctrl - P11; ctrl - P3; ctrl - P8; P2 - P10; P3 - P10; P2 - P11; P3 - P11; P2 - P3; P2 - P8; P3 - P8                                 |
| TC1600011361.hg.1       | TC1600011361.hg.1       | ENST00000614721           | ACSM3             | 6296    | 50.40 | 1.22 | 6.91 | 3.40 | P10 - ctrl; P3 - ctrl; P8 - ctrl; P10 - P11; P10 - P2; P2 - P11; P3 - P11; P8 - P11; P3 - P2; P8 - P2; P8 - P3                                  |
| TC1000012428.hg.1       | TC1000012428.hg.1       | NM_001253908              | AKR1C3            | 8644    | 50.32 | 1.23 | 6.91 | 3.43 | P10 - ctrl; P11 - ctrl; P3 - ctrl; P8 - ctrl; P10 - P11; P10 - P2; P11 - P2; P3 - P11; P8 - P11; P3 - P2; P8 - P2; P8 - P3                      |
| TC1500006569.hg.1       | TC1500006569.hg.1       | NR_001292                 | SNORD108          | 15q11.2 | 50.22 | 1.24 | 6.90 | 3.47 | ctrl - P10; ctrl - P3; ctrl - P8; P11 - P10; P2 - P10; P3 - P10; P11 - P3; P11 - P8; P2 - P3; P2 - P8; P3 - P8                                  |
| TC0900007518.hg.1       | TC0900007518.hg.1       | NM_153267                 | MAMDC2            | 256691  | 50.13 | 1.25 | 6.90 | 3.50 | ctrl - P10; ctrl - P11; ctrl - P2; ctrl - P8; P3 - P10; P8 - P10; P3 - P11; P8 - P11; P3 - P2; P8 - P2; P3 - P8                                 |
| TC1100012425.hg.1       | TC1100012425.hg.1       | teyjeeby.aAug10-unspliced | teyjeeby          | NA      | 50.11 | 1.26 | 6.90 | 3.50 | ctrl - P10; ctrl - P11; ctrl - P3; ctrl - P8; P11 - P10; P2 - P10; P3 - P10; P10 - P8; P2 - P11; P11 - P8; P2 - P3; P2 - P8; P3 - P8            |
| TC1400008780.hg.1       | TC1400008780.hg.1       | NM_002515                 | NOVA1             | 4857    | 50.09 | 1.26 | 6.89 | 3.50 | ctrl - P10; ctrl - P11; ctrl - P2; ctrl - P8; P11 - P10; P2 - P10; P3 - P10; P3 - P11; P11 - P8; P3 - P2; P2 - P8; P3 - P8                      |
| TSUnmapped00000123.hg.1 | TSUnmapped00000123.hg.1 | ENST00000626271           | SLC2A6            | NA      | 50.08 | 1.26 | 6.89 | 3.51 | P10 - ctrl; ctrl - P11; ctrl - P2; P3 - ctrl; P8 - ctrl; P10 - P11; P10 - P2; P8 - P10; P3 - P11; P8 - P11; P3 - P2; P8 - P2; P8 - P3           |
| TC0100013072.hg.1       | TC0100013072.hg.1       | NM_001141973              | ATP13A2           | 23400   | 50.07 | 1.26 | 6.89 | 3.51 | P10 - ctrl; ctrl - P2; P3 - ctrl; P8 - ctrl; P10 - P11; P10 - P2; P11 - P2; P3 - P11; P8 - P11; P3 - P2; P8 - P2; P8 - P3                       |
| TC0700006584.hg.1       | TC0700006584.hg.1       | flerka.aAug10-unspliced   | flerka            | NA      | 50.00 | 1.27 | 6.89 | 3.53 | ctrl - P10; ctrl - P11; ctrl - P3; ctrl - P8; P2 - P10; P3 - P10; P2 - P11; P3 - P11; P11 - P8; P2 - P3; P2 - P8; P3 - P8                       |
| TSUnmapped00000268.hg.1 | TSUnmapped00000268.hg.1 | ENST00000627310           | CCDC84            | 338657  | 49.99 | 1.28 | 6.89 | 3.53 | ctrl - P10; ctrl - P11; ctrl - P3; ctrl - P8; P2 - P10; P3 - P10; P2 - P11; P3 - P11; P2 - P3; P2 - P8; P3 - P8                                 |
| TC1600007379.hg.1       | TC1600007379.hg.1       | NA                        | NA                | NA      | 49.86 | 1.29 | 6.88 | 3.58 | ctrl - P10; ctrl - P11; ctrl - P3; ctrl - P8; P11 - P10; P2 - P10; P3 - P10; P2 - P11; P11 - P8; P2 - P3; P2 - P8; P3 - P8                      |
| TC1500006583.hg.1       | TC1500006583.hg.1       | NR_003297                 | SNORD115-5        | 15q11.2 | 49.84 | 1.30 | 6.88 | 3.58 | P10 - ctrl; P11 - ctrl; P2 - ctrl; P3 - ctrl; P8 - ctrl; P10 - P11; P10 - P2; P3 - P10; P3 - P11; P8 - P11; P3 - P2; P8 - P2; P3 - P8           |
| TC1500006586.hg.1       | TC1500006586.hg.1       | ENST00000362912           | SNORD115-9        | 15q11.2 | 49.84 | 1.30 | 6.88 | 3.58 | P10 - ctrl; P11 - ctrl; P2 - ctrl; P3 - ctrl; P8 - ctrl; P10 - P11; P10 - P2; P3 - P10; P3 - P11; P8 - P11; P3 - P2; P8 - P2; P3 - P8           |
| TC1500006589.hg.1       | TC1500006589.hg.1       | ENST00000362583           | SNORD115-12       | 15q11.2 | 49.84 | 1.30 | 6.88 | 3.58 | P10 - ctrl; P11 - ctrl; P2 - ctrl; P3 - ctrl; P8 - ctrl; P10 - P11; P10 - P2; P3 - P10; P3 - P11; P8 - P11; P3 - P2; P8 - P2; P3 - P8           |
| TC0700012439.hg.1       | TC0700012439.hg.1       | NM_005763                 | AASS              | 10157   | 49.77 | 1.31 | 6.88 | 3.60 | ctrl - P10; ctrl - P2; ctrl - P3; ctrl - P8; P11 - P10; P2 - P10; P3 - P10; P11 - P3; P11 - P8; P2 - P3; P2 - P8                                |
| TC0100017315.hg.1       | TC0100017315.hg.1       | sheeply.aAug10-unspliced  | sheeply           | NA      | 49.74 | 1.31 | 6.88 | 3.61 | ctrl - P10; ctrl - P3; ctrl - P8; P11 - P10; P2 - P10; P11 - P3; P11 - P8; P2 - P3; P2 - P8; P3 - P8                                            |
| TC0100018451.hg.1       | TC0100018451.hg.1       | NM_004120                 | GBP2              | 2634    | 49.66 | 1.32 | 6.87 | 3.63 | P10 - ctrl; P2 - ctrl; P3 - ctrl; P8 - ctrl; P10 - P11; P10 - P2; P10 - P3; P3 - P11; P8 - P11; P3 - P2; P8 - P2; P8 - P3                       |
| TC0400009003.hg.1       | TC0400009003.hg.1       | ENST00000517210           | RN7SKP35          | NA      | 49.66 | 1.32 | 6.87 | 3.63 | ctrl - P10; ctrl - P11; ctrl - P3; ctrl - P8; P11 - P10; P2 - P10; P3 - P10; P2 - P11; P11 - P8; P2 - P3; P2 - P8; P3 - P8                      |
| TC0200016353.hg.1       | TC0200016353.hg.1       | jawklo.aAug10-unspliced   | jawklo            | NA      | 49.65 | 1.33 | 6.87 | 3.63 | ctrl - P10; ctrl - P11; P2 - ctrl; ctrl - P3; ctrl - P8; P11 - P10; P2 - P10; P3 - P10; P2 - P11; P3 - P11; P11 - P8; P2 - P3; P2 - P8; P3 - P8 |
| TC0600009597.hg.1       | TC0600009597.hg.1       | NM_001270507              | TNFAIP3           | 7128    | 49.55 | 1.34 | 6.87 | 3.67 | P10 - ctrl; P11 - ctrl; P3 - ctrl; P8 - ctrl; P10 - P11; P10 - P2; P10 - P3; P3 - P11; P8 - P11; P3 - P2; P8 - P2; P8 - P3                      |
| TC1600011372.hg.1       | TC1600011372.hg.1       | NM_001017390              | SULT1A4           | 445329  | 49.44 | 1.36 | 6.86 | 3.71 | P10 - ctrl; P3 - ctrl; P8 - ctrl; P10 - P11; P10 - P2; P10 - P3; P3 - P11; P8 - P11; P3 - P2; P8 - P2; P8 - P3                                  |
| TC1800008895.hg.1       | TC1800008895.hg.1       | stasky.aAug10-unspliced   | stasky            | NA      | 49.40 | 1.36 | 6.86 | 3.73 | ctrl - P10; ctrl - P11; P2 - ctrl; ctrl - P3; ctrl - P8; P2 - P10; P10 - P8; P2 - P11; P11 - P8; P2 - P3; P2 - P8; P3 - P8                      |
| TC1500006590.hg.1       | TC1500006590.hg.1       | NR_003306                 | SNORD115-14       | 15q11.2 | 49.31 | 1.38 | 6.86 | 3.76 | P10 - ctrl; P11 - ctrl; P2 - ctrl; P3 - ctrl; P8 - ctrl; P10 - P11; P10 - P2; P3 - P10; P3 - P11; P8 - P11; P3 - P2; P8 - P2; P3 - P8           |
| TC0X00008080.hg.1       | TC0X00008080.hg.1       | NM_001170553              | VSIG1             | 340547  | 49.14 | 1.41 | 6.85 | 3.83 | P10 - ctrl; ctrl - P2; P3 - ctrl; P8 - ctrl; P10 - P11; P10 - P2; P10 - P3; P3 - P11; P8 - P11; P3 - P2; P8 - P2; P8 - P3                       |
| TC0200009759.hg.1       | TC0200009759.hg.1       | smuneebo.aAug10-unspliced | smuneebo          | NA      | 49.11 | 1.41 | 6.85 | 3.84 | ctrl - P10; P2 - ctrl; ctrl - P3; ctrl - P8; P11 - P10; P2 - P10; P3 - P10; P10 - P8; P2 - P11; P11 - P8; P2 - P3; P2 - P8; P3 - P8             |
| TC0100009938.hg.1       | TC0100009938.hg.1       | NM_006818                 | MLLT11            | 1q21    | 49.11 | 1.41 | 6.85 | 3.84 | ctrl - P11; ctrl - P2; P3 - ctrl; P8 - ctrl; P10 - P11; P10 - P2; P3 - P10; P8 - P10; P11 - P2; P3 - P11; P8 - P11; P3 - P2; P8 - P2; P8 - P3   |
| TC0100012172.hg.1       | TC0100012172.hg.1       | NM_003686                 | EXO1              | 9156    | 49.10 | 1.41 | 6.85 | 3.84 | P10 - ctrl; ctrl - P11; ctrl - P2; P3 - ctrl; P8 - ctrl; P10 - P11; P10 - P2; P8 - P10; P3 - P11; P8 - P11; P3 - P2; P8 - P2; P8 - P3           |

|                   |                   |                                |                   |          |             |              |            |              |                                                                                                                                                      |
|-------------------|-------------------|--------------------------------|-------------------|----------|-------------|--------------|------------|--------------|------------------------------------------------------------------------------------------------------------------------------------------------------|
| TC0200014791.hg.1 | TC0200014791.hg.1 | voykia.aAug10-<br>unspliced    | voykia            | NA       | 49.06<br>8  | 1.42<br>E-07 | 6.84<br>83 | 3.85<br>E-07 | ctrl - P10; ctrl - P11; P2 - ctrl; ctrl - P3; ctrl - P8; P2 - P10; P3 - P10; P10 - P8; P2 - P11; P3 - P11; P11 - P8; P2 - P3; P2 - P8; P3 - P8       |
| TC0800010800.hg.1 | TC0800010800.hg.1 | NM_153225                      | SBSPO             | 157869   | 49.00<br>9  | 1.43<br>E-07 | 6.84<br>53 | 3.87<br>E-07 | ctrl - P10; ctrl - P11; ctrl - P2; ctrl - P8; P11 - P10; P2 - P10; P3 - P10; P8 - P10; P11 - P8; P3 - P2; P2 - P8; P3 - P8                           |
| TC1500010800.hg.1 | TC1500010800.hg.1 | NM_000693                      | ALDH1A3           | 220      | 48.97<br>4  | 1.43<br>E-07 | 6.84<br>36 | 3.88<br>E-07 | P10 - ctrl; ctrl - P2; P3 - ctrl; P8 - ctrl; P10 - P11; P10 - P2; P8 - P10; P11 - P2; P3 - P11; P8 - P11; P3 - P2; P8 - P2; P8 - P3                  |
| TC0600012744.hg.1 | TC0600012744.hg.1 | uc063qjl.1                     | RNU6-117P         | NA       | 48.93<br>8  | 1.44<br>E-07 | 6.84<br>18 | 3.89<br>E-07 | ctrl - P10; ctrl - P11; ctrl - P3; ctrl - P8; P2 - P10; P2 - P11; P2 - P3; P2 - P8                                                                   |
| TC0800008423.hg.1 | TC0800008423.hg.1 | ENST00000518749.1              | KB-1107E3.1       |          | 48.83<br>7  | 1.46<br>E-07 | 6.83<br>67 | 3.93<br>E-07 | P10 - ctrl; P8 - ctrl; P10 - P11; P10 - P2; P10 - P3; P10 - P8; P8 - P11; P8 - P2; P8 - P3                                                           |
| TC1700006630.hg.1 | TC1700006630.hg.1 | NM_001114974                   | SMTNL2            | 342527   | 48.78<br>1  | 1.47<br>E-07 | 6.83<br>39 | 3.96<br>E-07 | ctrl - P10; ctrl - P2; ctrl - P3; ctrl - P8; P11 - P10; P2 - P10; P10 - P8; P11 - P2; P11 - P3; P11 - P8; P2 - P3; P2 - P8                           |
| TC0500013392.hg.1 | TC0500013392.hg.1 | NM_001308173                   | CCNJL             | 79616    | 48.35<br>4  | 1.54<br>E-07 | 6.81<br>23 | 4.15<br>E-07 | P10 - ctrl; P11 - ctrl; ctrl - P2; P3 - ctrl; P8 - ctrl; P10 - P11; P10 - P2; P10 - P3; P11 - P2; P8 - P11; P3 - P2; P8 - P2; P8 - P3                |
| TC0X00008335.hg.1 | TC0X00008335.hg.1 | poily.aAug10-<br>unspliced     | poily             | NA       | 48.26<br>5  | 1.56<br>E-07 | 6.80<br>77 | 4.19<br>E-07 | ctrl - P10; ctrl - P11; P2 - ctrl; ctrl - P8; P2 - P10; P3 - P10; P2 - P11; P3 - P11; P11 - P8; P2 - P3; P2 - P8; P3 - P8                            |
| TC0500007684.hg.1 | TC0500007684.hg.1 | hsa_circ_0072797               | TCONS_I2_00023407 | NA       | 48.19<br>1  | 1.57<br>E-07 | 6.80<br>4  | 4.22<br>E-07 | ctrl - P10; ctrl - P11; ctrl - P3; ctrl - P8; P11 - P10; P2 - P10; P3 - P10; P2 - P11; P11 - P8; P2 - P3; P2 - P8; P3 - P8                           |
| TC0400007751.hg.1 | TC0400007751.hg.1 | ENST00000507775                | RP13-644M16.5     | NA       | 48.13<br>5  | 1.58<br>E-07 | 6.80<br>11 | 4.25<br>E-07 | ctrl - P10; ctrl - P11; P2 - ctrl; ctrl - P8; P2 - P10; P3 - P10; P10 - P8; P2 - P11; P3 - P11; P11 - P8; P2 - P3; P2 - P8; P3 - P8                  |
| TC2000009970.hg.1 | TC2000009970.hg.1 | NM_001083910                   | SIRPB1            | 10326    | 47.47<br>87 | 1.63<br>E-07 | 6.78<br>76 | 4.38<br>E-07 | P10 - ctrl; P3 - ctrl; P8 - ctrl; P10 - P11; P10 - P2; P3 - P10; P2 - P11; P3 - P11; P8 - P11; P3 - P2; P8 - P2                                      |
| TC0300013513.hg.1 | TC0300013513.hg.1 | NM_001134418                   | P3H2              | 55214    | 47.87<br>86 | 1.63<br>E-07 | 6.78<br>71 | 4.38<br>E-07 | ctrl - P10; ctrl - P2; ctrl - P3; ctrl - P8; P11 - P10; P3 - P10; P11 - P2; P11 - P3; P11 - P8; P3 - P2; P3 - P8                                     |
| TC1000008495.hg.1 | TC1000008495.hg.1 | NM_001165979                   | PLCE1             | 51196    | 47.8<br>4   | 1.64<br>E-07 | 6.78<br>4  | 4.40<br>E-07 | P10 - ctrl; P2 - ctrl; P3 - ctrl; P8 - ctrl; P10 - P11; P10 - P2; P10 - P3; P8 - P10; P2 - P11; P3 - P11; P8 - P11; P8 - P2; P8 - P3                 |
| TC1200012452.hg.1 | TC1200012452.hg.1 | ENST00000542821.1              | RP11-989F5.3      |          | 47.79<br>2  | 1.65<br>E-07 | 6.78<br>36 | 4.40<br>E-07 | ctrl - P10; ctrl - P11; ctrl - P3; ctrl - P8; P2 - P10; P3 - P10; P10 - P8; P2 - P11; P3 - P11; P2 - P3; P2 - P8; P3 - P8                            |
| TC1100011611.hg.1 | TC1100011611.hg.1 | NM_173582                      | PGM2L1            | 283209   | 47.71<br>9  | 1.66<br>E-07 | 6.77<br>98 | 4.44<br>E-07 | P10 - ctrl; ctrl - P11; P3 - ctrl; P8 - ctrl; P10 - P11; P10 - P2; P2 - P11; P3 - P11; P8 - P11; P3 - P2; P8 - P2; P8 - P3                           |
| TC0300013071.hg.1 | TC0300013071.hg.1 | zyjebu.aAug10-<br>unspliced    | zyjebu            | NA       | 47.65<br>3  | 1.67<br>E-07 | 6.77<br>64 | 4.47<br>E-07 | ctrl - P10; ctrl - P11; ctrl - P3; ctrl - P8; P11 - P10; P2 - P10; P10 - P8; P2 - P11; P11 - P3; P11 - P8; P2 - P3; P2 - P8; P3 - P8                 |
| TC0200009220.hg.1 | TC0200009220.hg.1 | snervybo.aAug10-<br>unspliced  | snervybo          | NA       | 47.63<br>63 | 1.68<br>E-07 | 6.77<br>53 | 4.47<br>E-07 | ctrl - P10; ctrl - P11; ctrl - P3; ctrl - P8; P11 - P10; P2 - P10; P10 - P3; P10 - P8; P11 - P3; P11 - P8; P2 - P3; P2 - P8                          |
| TC0600007241.hg.1 | TC0600007241.hg.1 | LRRIC16A.IAug10-<br>unspliced  | LRRIC16A          | NA       | 47.60<br>3  | 1.68<br>E-07 | 6.77<br>38 | 4.48<br>E-07 | ctrl - P10; ctrl - P11; ctrl - P3; ctrl - P8; P11 - P10; P2 - P10; P3 - P10; P2 - P11; P3 - P11; P11 - P8; P2 - P3; P2 - P8; P3 - P8                 |
| TC0200008628.hg.1 | TC0200008628.hg.1 | ENST00000430586.1              | AC092168.2        |          | 47.59<br>5  | 1.68<br>E-07 | 6.77<br>34 | 4.48<br>E-07 | ctrl - P11; P2 - ctrl; P3 - ctrl; ctrl - P8; P10 - P11; P2 - P10; P3 - P10; P10 - P8; P2 - P11; P3 - P11; P2 - P8; P3 - P8                           |
| TC0100017314.hg.1 | TC0100017314.hg.1 | blydy.aAug10-<br>unspliced     | blydy             | NA       | 47.55<br>9  | 1.69<br>E-07 | 6.77<br>16 | 4.50<br>E-07 | ctrl - P10; ctrl - P11; ctrl - P2; ctrl - P3; ctrl - P8; P11 - P10; P2 - P10; P11 - P2; P11 - P3; P11 - P8; P2 - P3; P2 - P8; P3 - P8                |
| TC2200007980.hg.1 | TC2200007980.hg.1 | noheru.aAug10-<br>unspliced    | noheru            | NA       | 47.52<br>5  | 1.70<br>E-07 | 6.76<br>98 | 4.51<br>E-07 | ctrl - P10; ctrl - P11; ctrl - P3; ctrl - P8; P2 - P10; P3 - P10; P8 - P10; P2 - P11; P3 - P11; P8 - P11; P2 - P3; P2 - P8                           |
| TC0100016891.hg.1 | TC0100016891.hg.1 | NM_001305792                   | KIF14             | 9928     | 47.47<br>7  | 1.71<br>E-07 | 6.76<br>74 | 4.53<br>E-07 | P10 - ctrl; ctrl - P11; P3 - ctrl; P8 - ctrl; P10 - P11; P10 - P2; P8 - P10; P3 - P11; P8 - P11; P3 - P2; P8 - P2; P8 - P3                           |
| TC1100009402.hg.1 | TC1100009402.hg.1 | NR_103862                      | LOC100507283      | 1.01E+08 | 47.41<br>5  | 1.72<br>E-07 | 6.76<br>41 | 4.56<br>E-07 | ctrl - P10; ctrl - P2; ctrl - P3; ctrl - P8; P11 - P10; P2 - P10; P3 - P10; P8 - P10; P11 - P2; P11 - P3; P11 - P8; P2 - P8                          |
| TC0100012421.hg.1 | TC0100012421.hg.1 | NR_027055                      | FAM41C            | 284593   | 47.41<br>2  | 1.72<br>E-07 | 6.76<br>4  | 4.56<br>E-07 | ctrl - P10; ctrl - P11; P2 - ctrl; ctrl - P3; ctrl - P8; P11 - P10; P2 - P10; P3 - P10; P2 - P11; P11 - P8; P2 - P3; P2 - P8; P3 - P8                |
| TC1200009726.hg.1 | TC1200009726.hg.1 | swawchu.aAug10-<br>unspliced   | swawchu           | NA       | 47.34<br>5  | 1.74<br>E-07 | 6.76<br>05 | 4.59<br>E-07 | ctrl - P10; ctrl - P11; ctrl - P3; ctrl - P8; P11 - P10; P2 - P10; P3 - P10; P2 - P11; P11 - P8; P2 - P3; P2 - P8; P3 - P8                           |
| TC2000007239.hg.1 | TC2000007239.hg.1 | NM_001258329                   | EPB41L1           | 2036     | 47.47<br>14 | 1.78<br>E-07 | 6.74<br>99 | 4.70<br>E-07 | ctrl - P10; ctrl - P2; ctrl - P3; ctrl - P8; P11 - P10; P10 - P3; P11 - P2; P11 - P3; P11 - P8                                                       |
| TC0300013843.hg.1 | TC0300013843.hg.1 | NR_038264                      | ADAMTS9-AS2       | 1.01E+08 | 47.00<br>3  | 1.81<br>E-07 | 6.74<br>28 | 4.77<br>E-07 | ctrl - P10; ctrl - P2; ctrl - P3; ctrl - P8; P11 - P10; P2 - P10; P11 - P2; P11 - P3; P11 - P8; P2 - P3; P2 - P8                                     |
| TC0100014228.hg.1 | TC0100014228.hg.1 | NM_001018054                   | LRP8              | 7804     | 46.76<br>1  | 1.86<br>E-07 | 6.73<br>01 | 4.91<br>E-07 | P10 - ctrl; ctrl - P2; P3 - ctrl; P8 - ctrl; P10 - P11; P10 - P2; P3 - P10; P8 - P10; P11 - P2; P3 - P11; P8 - P11; P3 - P2; P8 - P2                 |
| TC0600009999.hg.1 | TC0600009999.hg.1 | ENST00000405341                | HSPE1P26          | NA       | 46.72<br>2  | 1.87<br>E-07 | 6.72<br>81 | 4.93<br>E-07 | ctrl - P10; ctrl - P11; P2 - ctrl; ctrl - P3; ctrl - P8; P11 - P10; P11 - P2; P10 - P10; P8 - P2; P11; P3 - P11; P11 - P8; P2 - P3; P2 - P8; P3 - P8 |
| TC0X00007936.hg.1 | TC0X00007936.hg.1 | NM_006733                      | CENPI             | 2491     | 46.70<br>8  | 1.87<br>E-07 | 6.72<br>73 | 4.93<br>E-07 | P10 - ctrl; ctrl - P11; ctrl - P2; P3 - ctrl; P8 - ctrl; P10 - P11; P10 - P2; P8 - P10; P3 - P11; P8 - P11; P3 - P2; P8 - P2; P8 - P3                |
| TC0X00007507.hg.1 | TC0X00007507.hg.1 | NM_004429                      | EFNB1             | 1947     | 46.69<br>9  | 1.88<br>E-07 | 6.72<br>68 | 4.93<br>E-07 | P10 - ctrl; P11 - ctrl; P3 - ctrl; P8 - ctrl; P10 - P11; P10 - P2; P8 - P10; P3 - P11; P8 - P11; P3 - P2; P8 - P2; P8 - P3                           |
| TC1800006590.hg.1 | TC1800006590.hg.1 | weeso.aAug10-<br>unspliced     | weeso             | NA       | 46.69<br>4  | 1.88<br>E-07 | 6.72<br>65 | 4.93<br>E-07 | ctrl - P10; ctrl - P11; P2 - ctrl; ctrl - P3; ctrl - P8; P2 - P10; P3 - P10; P10 - P8; P2 - P11; P3 - P11; P11 - P8; P2 - P3; P2 - P8; P3 - P8       |
| TC1100008489.hg.1 | TC1100008489.hg.1 | smgylawbu.aAug10-<br>unspliced | smgylawbu         | NA       | 46.67<br>9  | 1.88<br>E-07 | 6.72<br>58 | 4.93<br>E-07 | ctrl - P10; ctrl - P11; P2 - ctrl; ctrl - P3; ctrl - P8; P11 - P10; P2 - P10; P3 - P10; P2 - P11; P11 - P8; P2 - P3; P2 - P8; P3 - P8                |
| TC1000011923.hg.1 | TC1000011923.hg.1 | NM_001145453                   | GFRA1             | 2674     | 46.60<br>4  | 1.90<br>E-07 | 6.72<br>18 | 4.97<br>E-07 | ctrl - P10; ctrl - P2; P3 - ctrl; P8 - ctrl; P3 - P10; P8 - P10; P3 - P11; P8 - P11; P3 - P2; P8 - P2; P3 - P8                                       |

|                   |                   |                                |               |          |             |              |              |              |                                                                                                                                                 |
|-------------------|-------------------|--------------------------------|---------------|----------|-------------|--------------|--------------|--------------|-------------------------------------------------------------------------------------------------------------------------------------------------|
| TC1100008121.hg.1 | TC1100008121.hg.1 | hakora.aAug10-<br>unspliced    | hakora        | NA       | 46.56<br>9  | 1.91<br>E-07 | 6.72<br>E-07 | 4.98<br>E-07 | ctrl - P10; ctrl - P11; P2 - ctrl; ctrl - P3; ctrl - P8; P11 - P10; P2 - P10; P10 - P8; P2 - P11; P11 - P3; P11 - P8; P2 - P3; P2 - P8; P3 - P8 |
| TC0800009429.hg.1 | TC0800009429.hg.1 | NM_005218                      | DEFB1         | 1672     | 46.56<br>56 | 1.91<br>E-07 | 6.71<br>95   | 4.98<br>E-07 | P10 - ctrl; P11 - ctrl; P2 - ctrl; P8 - ctrl; P10 - P2; P10 - P3; P11 - P2; P11 - P3; P8 - P2; P8 - P3                                          |
| TC1700011456.hg.1 | TC1700011456.hg.1 | satama.aAug10-<br>unspliced    | satama        | NA       | 46.55<br>8  | 1.91<br>E-07 | 6.71<br>94   | 4.98<br>E-07 | ctrl - P10; ctrl - P11; ctrl - P3; ctrl - P8; P2 - P10; P2 - P11; P11 - P8; P2 - P3; P2 - P8; P3 - P8                                           |
| TC1500010108.hg.1 | TC1500010108.hg.1 | ENST00000602975.1              | RP11-797A18.6 |          | 46.52<br>2  | 1.92<br>E-07 | 6.71<br>75   | 5.00<br>E-07 | ctrl - P10; ctrl - P11; ctrl - P3; ctrl - P8; P2 - P10; P3 - P10; P2 - P11; P11 - P8; P2 - P3; P2 - P8; P3 - P8                                 |
| TC1200008849.hg.1 | TC1200008849.hg.1 | uc058tfd.1                     | AC144522.1    | NA       | 46.50<br>1  | 1.92<br>E-07 | 6.71<br>64   | 5.01<br>E-07 | ctrl - P10; ctrl - P11; ctrl - P3; ctrl - P8; P2 - P10; P3 - P10; P2 - P11; P11 - P8; P2 - P3; P2 - P8; P3 - P8                                 |
| TC2100007663.hg.1 | TC2100007663.hg.1 | NM_001130914                   | BTG3          | 10950    | 46.47<br>4  | 1.93<br>E-07 | 6.71<br>5    | 5.02<br>E-07 | P10 - ctrl; ctrl - P2; P3 - ctrl; P8 - ctrl; P10 - P11; P10 - P2; P3 - P10; P8 - P10; P11 - P2; P3 - P11; P8 - P11; P3 - P2; P8 - P2            |
| TC0400007901.hg.1 | TC0400007901.hg.1 | NM_020859                      | SHROOM3       | 57619    | 46.40<br>7  | 1.94<br>E-07 | 6.71<br>14   | 5.05<br>E-07 | P10 - ctrl; P11 - ctrl; ctrl - P2; P3 - ctrl; P8 - ctrl; P10 - P11; P10 - P2; P10 - P3; P11 - P2; P8 - P11; P3 - P2; P8 - P2; P8 - P3           |
| TC0300006437.hg.1 | TC0300006437.hg.1 | NM_001253387                   | CHL1          | 10752    | 46.36<br>7  | 1.95<br>E-07 | 6.70<br>93   | 5.07<br>E-07 | ctrl - P10; ctrl - P11; ctrl - P2; ctrl - P3; ctrl - P8; P11 - P10; P11 - P2; P11 - P3; P11 - P8                                                |
| TC1100012957.hg.1 | TC1100012957.hg.1 | NM_001199573                   | TRIM22        | 10346    | 46.33<br>4  | 1.96<br>E-07 | 6.70<br>76   | 5.09<br>E-07 | P10 - ctrl; ctrl - P11; ctrl - P2; P3 - ctrl; P8 - ctrl; P10 - P11; P10 - P2; P3 - P11; P8 - P11; P3 - P2; P8 - P2                              |
| TC0800011057.hg.1 | TC0800011057.hg.1 | swaly.aAug10-<br>unspliced     | swaly         | NA       | 46.33<br>33 | 1.96<br>E-07 | 6.70<br>74   | 5.09<br>E-07 | ctrl - P10; ctrl - P11; P2 - ctrl; ctrl - P8; P2 - P10; P3 - P10; P10 - P8; P2 - P11; P3 - P11; P2 - P3; P2 - P8; P3 - P8                       |
| TC2200007795.hg.1 | TC2200007795.hg.1 | uc062fle.1                     | AL022328.1    | NA       | 46.23<br>2  | 1.99<br>E-07 | 6.70<br>22   | 5.14<br>E-07 | P10 - ctrl; P11 - ctrl; P3 - ctrl; P8 - ctrl; P10 - P11; P10 - P2; P10 - P3; P10 - P8; P11 - P2; P3 - P2; P8 - P2; P8 - P3                      |
| TC1400009364.hg.1 | TC1400009364.hg.1 | NR_110416                      | LOC101927780  | 1.02E+08 | 46.07<br>3  | 2.02<br>E-07 | 6.69<br>37   | 5.24<br>E-07 | P10 - ctrl; ctrl - P11; ctrl - P2; P3 - ctrl; P8 - ctrl; P10 - P11; P10 - P2; P8 - P10; P3 - P11; P8 - P11; P3 - P2; P8 - P2; P8 - P3           |
| TC0100011472.hg.1 | TC0100011472.hg.1 | NM_001122834                   | HHAT          | 55733    | 46.02<br>46 | 2.04<br>E-07 | 6.69<br>1    | 5.26<br>E-07 | P10 - ctrl; P3 - ctrl; P8 - ctrl; P10 - P11; P10 - P2; P3 - P10; P8 - P10; P11 - P2; P3 - P11; P8 - P11; P3 - P2; P8 - P2                       |
| TC1500010463.hg.1 | TC1500010463.hg.1 | NM_001267580                   | PRC1          | 9055     | 45.93<br>4  | 2.06<br>E-07 | 6.68<br>63   | 5.32<br>E-07 | P10 - ctrl; ctrl - P11; ctrl - P2; P8 - ctrl; P10 - P11; P10 - P2; P10 - P3; P8 - P10; P3 - P11; P8 - P11; P3 - P2; P8 - P2; P8 - P3            |
| TC1200010620.hg.1 | TC1200010620.hg.1 | ENST00000550468.2              | RP11-161H23.5 |          | 45.86<br>7  | 2.08<br>E-07 | 6.68<br>27   | 5.35<br>E-07 | P10 - ctrl; P11 - ctrl; P3 - ctrl; P8 - ctrl; P10 - P11; P10 - P2; P10 - P3; P11 - P2; P3 - P11; P8 - P11; P3 - P2; P8 - P2; P8 - P3            |
| TC1300007795.hg.1 | TC1300007795.hg.1 | NA                             | NA            | NA       | 45.81<br>6  | 2.09<br>E-07 | 6.68<br>01   | 5.38<br>E-07 | ctrl - P10; ctrl - P11; ctrl - P3; ctrl - P8; P11 - P10; P2 - P10; P3 - P10; P2 - P11; P3 - P11; P11 - P8; P2 - P3; P2 - P8; P3 - P8            |
| TC1200007567.hg.1 | TC1200007567.hg.1 | NM_012284                      | KCNH3         | 23416    | 45.81<br>5  | 2.09<br>E-07 | 6.68<br>E-07 | 5.38<br>E-07 | ctrl - P10; ctrl - P11; ctrl - P2; ctrl - P3; ctrl - P8; P11 - P10; P2 - P10; P3 - P10; P11 - P2; P11 - P3; P11 - P8; P2 - P8; P3 - P8          |
| TC0Y00006645.hg.1 | TC0Y00006645.hg.1 | stuby.aAug10-<br>unspliced     | stuby         | NA       | 45.70<br>7  | 2.12<br>E-07 | 6.67<br>42   | 5.44<br>E-07 | ctrl - P10; ctrl - P11; ctrl - P3; ctrl - P8; P11 - P10; P2 - P10; P3 - P10; P2 - P11; P3 - P11; P11 - P8; P2 - P8; P3 - P8                     |
| TC0200008538.hg.1 | TC0200008538.hg.1 | leekorbu.aAug10-<br>unspliced  | leekorbu      | NA       | 45.65<br>4  | 2.13<br>E-07 | 6.67<br>14   | 5.47<br>E-07 | ctrl - P10; ctrl - P11; P2 - ctrl; ctrl - P8; P11 - P10; P2 - P10; P3 - P10; P2 - P11; P3 - P11; P11 - P8; P2 - P3; P2 - P8; P3 - P8            |
| TC1300009729.hg.1 | TC1300009729.hg.1 | reenoy.aAug10-<br>unspliced    | reenoy        | NA       | 45.60<br>5  | 2.14<br>E-07 | 6.66<br>87   | 5.50<br>E-07 | ctrl - P10; ctrl - P11; P2 - ctrl; ctrl - P8; P11 - P10; P2 - P10; P3 - P10; P2 - P11; P11 - P8; P2 - P3; P2 - P8; P3 - P8                      |
| TC0X00010098.hg.1 | TC0X00010098.hg.1 | NM_001008537                   | KIAA2022      | 340533   | 45.28<br>6  | 2.23<br>E-07 | 6.65<br>16   | 5.72<br>E-07 | ctrl - P10; ctrl - P2; ctrl - P3; ctrl - P8; P11 - P10; P8 - P10; P11 - P2; P11 - P3; P11 - P8; P3 - P2; P8 - P2                                |
| TC1200011574.hg.1 | TC1200011574.hg.1 | NM_018351                      | FGD6          | 55785    | 45.27<br>6  | 2.23<br>E-07 | 6.65<br>1    | 5.72<br>E-07 | P10 - ctrl; P3 - ctrl; P8 - ctrl; P10 - P11; P10 - P2; P3 - P10; P8 - P10; P3 - P11; P8 - P11; P3 - P2; P8 - P2; P3 - P8                        |
| TC1800008899.hg.1 | TC1800008899.hg.1 | smeebor.aAug10-<br>unspliced   | smeebor       | NA       | 45.21<br>9  | 2.25<br>E-07 | 6.64<br>79   | 5.75<br>E-07 | ctrl - P10; ctrl - P11; P2 - ctrl; ctrl - P3; ctrl - P8; P2 - P10; P10 - P8; P2 - P11; P11 - P8; P2 - P3; P2 - P8; P3 - P8                      |
| TC0800008080.hg.1 | TC0800008080.hg.1 | NM_001444                      | FABP5         | 2171     | 45.21<br>4  | 2.25<br>E-07 | 6.64<br>77   | 5.75<br>E-07 | ctrl - P10; ctrl - P11; P3 - ctrl; ctrl - P8; P11 - P10; P2 - P10; P3 - P10; P2 - P11; P3 - P11; P3 - P2; P2 - P8; P3 - P8                      |
| TC0700013428.hg.1 | TC0700013428.hg.1 | NM_178238                      | PILRB         | 29990    | 45.15<br>3  | 2.27<br>E-07 | 6.64<br>44   | 5.79<br>E-07 | ctrl - P10; ctrl - P11; ctrl - P2; ctrl - P3; ctrl - P8; P11 - P10; P2 - P10; P3 - P10; P2 - P11; P11 - P8; P2 - P3; P2 - P8; P3 - P8           |
| TC0100015705.hg.1 | TC0100015705.hg.1 | NA                             | NA            | NA       | 45.09<br>6  | 2.28<br>E-07 | 6.64<br>13   | 5.82<br>E-07 | P10 - ctrl; P11 - ctrl; P8 - ctrl; P10 - P11; P10 - P2; P10 - P3; P11 - P2; P11 - P3; P3 - P2; P8 - P2; P8 - P3                                 |
| TC0900011148.hg.1 | TC0900011148.hg.1 | NM_001286974                   | CTNNA1        | 8727     | 45.08<br>3  | 2.29<br>E-07 | 6.64<br>07   | 5.83<br>E-07 | P10 - ctrl; ctrl - P2; P3 - ctrl; P8 - ctrl; P10 - P11; P10 - P2; P3 - P10; P8 - P10; P11 - P2; P3 - P11; P8 - P11; P3 - P2; P8 - P2            |
| TC1200011753.hg.1 | TC1200011753.hg.1 | NA                             | NA            | NA       | 44.92<br>5  | 2.33<br>E-07 | 6.63<br>2    | 5.94<br>E-07 | P10 - ctrl; P11 - ctrl; P3 - ctrl; P8 - ctrl; P10 - P11; P10 - P2; P10 - P3; P11 - P2; P8 - P11; P3 - P2; P8 - P2; P8 - P3                      |
| TC0400008487.hg.1 | TC0400008487.hg.1 | spoklawby.cAug10-<br>unspliced | spoklawby     | NA       | 44.92<br>92 | 2.34<br>E-07 | 6.63<br>17   | 5.94<br>E-07 | ctrl - P10; ctrl - P11; ctrl - P3; ctrl - P8; P11 - P10; P2 - P10; P2 - P11; P11 - P3; P11 - P8; P2 - P3; P2 - P8                               |
| TC0100017732.hg.1 | TC0100017732.hg.1 | ENST00000416221.1              | RP11-295G20.2 |          | 44.88<br>3  | 2.35<br>E-07 | 6.62<br>97   | 5.96<br>E-07 | P10 - ctrl; P11 - ctrl; P3 - ctrl; P8 - ctrl; P10 - P11; P10 - P2; P3 - P10; P8 - P10; P11 - P2; P3 - P11; P8 - P11; P3 - P2; P8 - P2           |
| TC0400006478.hg.1 | TC0400006478.hg.1 | NA                             | NA            | NA       | 44.80<br>9  | 2.37<br>E-07 | 6.62<br>57   | 6.00<br>E-07 | ctrl - P10; ctrl - P11; ctrl - P2; ctrl - P3; ctrl - P8; P2 - P10; P3 - P10; P2 - P11; P2 - P3; P2 - P8; P3 - P8                                |
| TC0800011912.hg.1 | TC0800011912.hg.1 | NA                             | NA            | NA       | 44.80<br>8  | 2.37<br>E-07 | 6.62<br>56   | 6.00<br>E-07 | ctrl - P10; ctrl - P11; ctrl - P3; ctrl - P8; P11 - P10; P2 - P10; P2 - P11; P11 - P3; P11 - P8; P2 - P3; P2 - P8; P3 - P8                      |
| TC1100013201.hg.1 | TC1100013201.hg.1 | ENST00000542515                | ORAQV1        | 220064   | 44.79<br>7  | 2.37<br>E-07 | 6.62<br>5    | 6.00<br>E-07 | P10 - ctrl; P11 - ctrl; ctrl - P2; P3 - ctrl; P8 - ctrl; P10 - P11; P10 - P2; P11 - P2; P3 - P11; P8 - P11; P3 - P2; P8 - P2                    |

|                   |                   |                                   |               |          |       |      |      |      |                                                                                                                                                       |
|-------------------|-------------------|-----------------------------------|---------------|----------|-------|------|------|------|-------------------------------------------------------------------------------------------------------------------------------------------------------|
| TC0600012434.hg.1 | TC0600012434.hg.1 | NM_002395                         | ME1           | 4199     | 44.70 | 2.40 | 6.61 | 6.07 | P10 - ctrl; ctrl - P11; ctrl - P2; P3 - ctrl; P8 - ctrl; P10 - P11; P10 - P2; P11 - P2; P3 - P11; P8 - P11; P3 - P2; P8 - P2                          |
| TC0800007362.hg.1 | TC0800007362.hg.1 | NM_021623                         | PLEKHA2       | 59339    | 44.67 | 2.41 | 6.61 | 6.09 | P10 - ctrl; ctrl - P2; P8 - ctrl; P10 - P11; P10 - P2; P10 - P3; P11 - P2; P8 - P11; P3 - P2; P8 - P2; P8 - P3                                        |
| TC0300008740.hg.1 | TC0300008740.hg.1 | zorbobu.aAug10-<br>unspliced      | zorbobu       | NA       | 44.7  | 2.42 | 6.61 | 6.10 | ctrl - P10; ctrl - P11; P2 - ctrl; ctrl - P3; ctrl - P8; P2 - P10; P3 - P10; P2 - P11; P3 - P11; P11 - P8; P2 - P3; P2 - P8; P3 - P8                  |
| TC0300013665.hg.1 | TC0300013665.hg.1 | ENST00000308466                   | MUC4          | 4585     | 44.61 | 2.43 | 6.61 | 6.12 | P10 - ctrl; P8 - ctrl; P10 - P11; P10 - P2; P10 - P3; P8 - P11; P8 - P2; P8 - P3                                                                      |
| TC1400007585.hg.1 | TC1400007585.hg.1 | NR_125769                         | LINC01269     | 1.04E+08 | 44.61 | 2.43 | 6.61 | 6.12 | P10 - ctrl; P3 - ctrl; P8 - ctrl; P10 - P11; P10 - P2; P3 - P10; P8 - P10; P3 - P11; P8 - P11; P3 - P2; P8 - P2; P3 - P8                              |
| TC0200012082.hg.1 | TC0200012082.hg.1 | NM_015662                         | IFT172        | 26160    | 44.57 | 2.44 | 6.61 | 6.14 | ctrl - P10; ctrl - P2; ctrl - P3; ctrl - P8; P11 - P10; P2 - P10; P10 - P3; P11 - P2; P11 - P3; P11 - P8; P2 - P3; P2 - P8                            |
| TC0200015618.hg.1 | TC0200015618.hg.1 | veygorbo.aAug10-<br>unspliced     | veygorbo      | NA       | 44.44 | 2.48 | 6.60 | 6.23 | ctrl - P10; ctrl - P3; ctrl - P8; P11 - P10; P2 - P10; P10 - P8; P11 - P3; P11 - P8; P2 - P3; P2 - P8                                                 |
| TC0500013185.hg.1 | TC0500013185.hg.1 | ENST00000425529                   | RP11-497H16.7 |          | 43.94 | 2.64 | 6.57 | 6.63 | ctrl - P10; ctrl - P11; ctrl - P3; ctrl - P8; P11 - P10; P2 - P10; P3 - P10; P2 - P11; P11 - P8; P2 - P3; P2 - P8; P3 - P8                            |
| TC0300011979.hg.1 | TC0300011979.hg.1 | NM_024508                         | ZBED2         | 79413    | 43.91 | 2.65 | 6.57 | 6.65 | P10 - ctrl; P3 - ctrl; P8 - ctrl; P10 - P11; P10 - P2; P3 - P11; P8 - P11; P3 - P2; P8 - P2                                                           |
| TC1500009610.hg.1 | TC1500009610.hg.1 | veysorbo.aAug10-<br>unspliced     | veysorbo      | NA       | 43.81 | 2.69 | 6.57 | 6.74 | ctrl - P10; ctrl - P11; P2 - ctrl; ctrl - P8; P10 - P11; P2 - P10; P3 - P10; P10 - P8; P2 - P11; P3 - P11; P11 - P8; P2 - P3; P2 - P8; P3 - P8        |
| TC1300008930.hg.1 | TC1300008930.hg.1 | chorwarby.aAug10-<br>unspliced    | chorwarby     | NA       | 43.74 | 2.71 | 6.56 | 6.79 | ctrl - P10; ctrl - P11; ctrl - P8; P2 - P10; P3 - P10; P10 - P8; P2 - P11; P3 - P11; P11 - P8; P2 - P3; P2 - P8; P3 - P8                              |
| TC1000012227.hg.1 | TC1000012227.hg.1 | NM_152311                         | CLRN3         | 119467   | 43.72 | 2.72 | 6.56 | 6.80 | P10 - ctrl; P11 - ctrl; P2 - ctrl; P3 - ctrl; P8 - ctrl; P10 - P11; P10 - P2; P10 - P3; P10 - P8; P11 - P3; P11 - P8; P2 - P3; P2 - P8; P8 - P3       |
| TC0200007399.hg.1 | TC0200007399.hg.1 | NM_172069                         | PLEKHH2       | 130271   | 43.62 | 2.75 | 6.56 | 6.87 | ctrl - P10; ctrl - P11; ctrl - P3; ctrl - P8; P2 - P10; P2 - P11; P2 - P3; P2 - P8                                                                    |
| TC0400008772.hg.1 | TC0400008772.hg.1 | NR_038380                         | SLC7A11-AS1   | 641364   | 43.62 | 2.75 | 6.56 | 6.87 | P10 - ctrl; P3 - ctrl; P8 - ctrl; P10 - P11; P10 - P2; P3 - P10; P11 - P2; P3 - P11; P8 - P11; P3 - P2; P8 - P2; P3 - P8                              |
| TC0100009850.hg.1 | TC0100009850.hg.1 | ENST00000466343.2                 | RP4-791M13.3  |          | 43.6  | 2.76 | 6.55 | 6.89 | ctrl - P10; ctrl - P11; ctrl - P3; ctrl - P8; P11 - P10; P2 - P10; P3 - P10; P2 - P11; P11 - P3; P11 - P8; P2 - P3; P2 - P8; P3 - P8                  |
| TC0100007841.hg.1 | TC0100007841.hg.1 | NM_001256875                      | CDCA8         | 55143    | 43.57 | 2.77 | 6.55 | 6.91 | P10 - ctrl; ctrl - P2; P3 - ctrl; P8 - ctrl; P10 - P11; P10 - P2; P10 - P3; P8 - P10; P3 - P11; P8 - P11; P3 - P2; P8 - P2; P8 - P3                   |
| TC1500007511.hg.1 | TC1500007511.hg.1 | garstaw.aAug10-<br>unspliced      | garstaw       | NA       | 43.53 | 2.79 | 6.55 | 6.93 | ctrl - P10; ctrl - P11; ctrl - P3; ctrl - P8; P10 - P11; P2 - P10; P3 - P10; P2 - P11; P3 - P11; P2 - P3; P2 - P8; P3 - P8                            |
| TC0200009626.hg.1 | TC0200009626.hg.1 | NM_001195685                      | LYPD6         | 2q23.2   | 43.51 | 2.79 | 6.55 | 6.95 | ctrl - P10; P11 - ctrl; ctrl - P2; ctrl - P3; ctrl - P8; P11 - P10; P8 - P10; P11 - P2; P11 - P3; P11 - P8; P8 - P2; P8 - P3                          |
| TC1800008997.hg.1 | TC1800008997.hg.1 | NR_038325                         | LINC01541     | 1.01E+08 | 43.41 | 2.83 | 6.54 | 7.02 | P10 - ctrl; P3 - ctrl; P8 - ctrl; P10 - P11; P10 - P2; P10 - P3; P2 - P11; P3 - P11; P8 - P11; P8 - P2; P8 - P3                                       |
| TC0400012972.hg.1 | TC0400012972.hg.1 | NM_020724                         | RNF150        | 57484    | 43.41 | 2.83 | 6.54 | 7.02 | ctrl - P10; ctrl - P11; ctrl - P2; ctrl - P3; ctrl - P8; P11 - P10; P3 - P10; P11 - P2; P11 - P3; P11 - P8                                            |
| TC0800009782.hg.1 | TC0800009782.hg.1 | NM_001130518                      | CSGALNACT1    | 55790    | 43.39 | 2.84 | 6.54 | 7.02 | P10 - ctrl; P11 - ctrl; P2 - ctrl; P3 - ctrl; P8 - ctrl; P10 - P11; P10 - P2; P10 - P3; P11 - P2; P8 - P11; P3 - P2; P8 - P2; P8 - P3                 |
| TC0100011099.hg.1 | TC0100011099.hg.1 | kleyplu.aAug10-<br>unspliced      | kleyplu       | NA       | 43.39 | 2.84 | 6.54 | 7.02 | ctrl - P10; ctrl - P11; P2 - ctrl; ctrl - P3; ctrl - P8; P11 - P10; P2 - P10; P3 - P10; P10 - P8; P2 - P11; P11 - P8; P2 - P3; P2 - P8; P3 - P8       |
| TC1600009427.hg.1 | TC1600009427.hg.1 | LOC729978.dAug10                  | LOC729978     |          | 43.27 | 2.88 | 6.54 | 7.13 | ctrl - P10; ctrl - P11; ctrl - P3; ctrl - P8; P11 - P10; P2 - P10; P3 - P10; P8 - P10; P2 - P11; P11 - P8; P2 - P3; P2 - P8; P3 - P8                  |
| TC0600011460.hg.1 | TC0600011460.hg.1 | LOC100287365.aAug10-<br>unspliced | LOC100287365  | NA       | 43.24 | 2.89 | 6.53 | 7.15 | P10 - ctrl; P11 - ctrl; ctrl - P2; P3 - ctrl; P8 - ctrl; P10 - P11; P10 - P2; P10 - P3; P10 - P8; P11 - P2; P11 - P3; P11 - P8; P2 - P3; P2 - P8 - P3 |
| TC1500006568.hg.1 | TC1500006568.hg.1 | jeezaw.aAug10-<br>unspliced       | jeezaw        | NA       | 43.23 | 2.90 | 6.53 | 7.15 | ctrl - P10; ctrl - P11; P2 - ctrl; ctrl - P3; ctrl - P8; P2 - P10; P10 - P8; P2 - P11; P11 - P8; P2 - P3; P2 - P8; P3 - P8                            |
| TC1900011960.hg.1 | TC1900011960.hg.1 | NM_021016                         | PSG3          | 5671     | 43.14 | 2.93 | 6.53 | 7.23 | P10 - ctrl; P3 - ctrl; P8 - ctrl; P10 - P11; P10 - P2; P3 - P10; P8 - P10; P3 - P11; P8 - P11; P3 - P2; P8 - P2                                       |
| TC0400011646.hg.1 | TC0400011646.hg.1 | smusnawby.aAug10-<br>unspliced    | smusnawby     | NA       | 43.08 | 2.95 | 6.52 | 7.27 | ctrl - P10; ctrl - P11; ctrl - P3; ctrl - P8; P11 - P10; P2 - P10; P3 - P10; P2 - P11; P3 - P11; P11 - P8; P2 - P3; P2 - P8; P3 - P8                  |
| TC0200014765.hg.1 | TC0200014765.hg.1 | DPP4.nAug10-<br>unspliced         | DPP4          | NA       | 42.95 | 3.00 | 6.52 | 7.39 | ctrl - P10; ctrl - P3; ctrl - P8; P11 - P10; P2 - P10; P3 - P10; P10 - P8; P11 - P8; P2 - P8; P3 - P8                                                 |
| TC0X00010083.hg.1 | TC0X00010083.hg.1 | NR_030398                         | MIR421        | 693122   | 42.92 | 3.00 | 6.52 | 7.39 | ctrl - P10; ctrl - P11; P2 - ctrl; ctrl - P3; ctrl - P8; P2 - P10; P3 - P10; P2 - P11; P11 - P8; P2 - P3; P2 - P8; P3 - P8                            |
| TC0100014852.hg.1 | TC0100014852.hg.1 | NM_002053                         | GBP1          | 2633     | 42.91 | 3.02 | 6.52 | 7.41 | P10 - ctrl; ctrl - P11; ctrl - P2; P8 - ctrl; P10 - P11; P10 - P2; P10 - P3; P3 - P11; P8 - P11; P3 - P2; P8 - P2; P8 - P3                            |
| TC1600011465.hg.1 | TC1600011465.hg.1 | NR_040023                         | ERVK13-1      | 1.01E+08 | 42.91 | 3.02 | 6.52 | 7.41 | ctrl - P10; ctrl - P11; P2 - ctrl; ctrl - P3; ctrl - P8; P11 - P10; P2 - P10; P2 - P11; P11 - P3; P11 - P8; P2 - P3; P2 - P8; P3 - P8                 |
| TC1800009245.hg.1 | TC1800009245.hg.1 | NM_001031848                      | SERPINB8      | 5271     | 42.9  | 3.02 | 6.51 | 7.42 | P10 - ctrl; P3 - ctrl; P8 - ctrl; P10 - P11; P10 - P2; P3 - P11; P8 - P11; P3 - P2; P8 - P2                                                           |
| TC0200008502.hg.1 | TC0200008502.hg.1 | NM_001281710                      | NCAPH         | 23397    | 42.88 | 3.03 | 6.51 | 7.43 | P10 - ctrl; ctrl - P11; ctrl - P2; P8 - ctrl; P10 - P11; P10 - P2; P10 - P3; P8 - P10; P3 - P11; P8 - P11; P3 - P2; P8 - P2; P8 - P3                  |
| TC0500012373.hg.1 | TC0500012373.hg.1 | basteyby.aAug10-<br>unspliced     | basteyby      | NA       | 42.86 | 3.04 | 6.51 | 7.43 | ctrl - P10; ctrl - P11; ctrl - P3; ctrl - P8; P11 - P10; P2 - P10; P3 - P10; P2 - P11; P11 - P3; P11 - P8; P2 - P3; P2 - P8                           |

|                   |                   |                            |                   |              |        |          |        |          |                                                                                                                                                  |
|-------------------|-------------------|----------------------------|-------------------|--------------|--------|----------|--------|----------|--------------------------------------------------------------------------------------------------------------------------------------------------|
| TC1500009071.hg.1 | TC1500009071.hg.1 | ENST00000560769.1          | CTD-2033D15.1     |              | 42.833 | 3.05E-07 | 6.5156 | 7.46E-07 | P10 - ctrl; ctrl - P2; P3 - ctrl; P8 - ctrl; P10 - P11; P10 - P2; P8 - P10; P3 - P11; P8 - P11; P3 - P2; P8 - P2                                 |
| TC0500007050.hg.1 | TC0500007050.hg.1 | NM_178140                  | PDZD2             | 23037        | 42.806 | 3.06E-07 | 6.514  | 7.48E-07 | P10 - ctrl; ctrl - P2; P8 - ctrl; P10 - P11; P10 - P2; P10 - P3; P11 - P2; P8 - P11; P8 - P2; P8 - P3                                            |
| TC0200014718.hg.1 | TC0200014718.hg.1 | meymo.aAug10-unspliced     | meymo             | NA           | 42.769 | 3.08E-07 | 6.5119 | 7.51E-07 | ctrl - P10; ctrl - P11; ctrl - P3; ctrl - P8; P11 - P10; P2 - P10; P2 - P11; P11 - P3; P11 - P8; P2 - P3; P2 - P8                                |
| TC0900008395.hg.1 | TC0900008395.hg.1 | NA                         | NA                | NA           | 42.615 | 3.14E-07 | 6.5031 | 7.66E-07 | ctrl - P10; ctrl - P11; ctrl - P3; ctrl - P8; P11 - P10; P2 - P10; P3 - P10; P10 - P8; P2 - P11; P11 - P8; P2 - P3; P2 - P8; P3 - P8             |
| TC0600007610.hg.1 | TC0600007610.hg.1 | NM_002441                  | MSH5              | 4439         | 42.585 | 3.15E-07 | 6.5014 | 7.68E-07 | ctrl - P10; ctrl - P11; ctrl - P3; ctrl - P8; P11 - P10; P2 - P10; P3 - P10; P8 - P10; P2 - P11; P11 - P8; P2 - P3; P2 - P8; P3 - P8             |
| TC0X00008056.hg.1 | TC0X00008056.hg.1 | NM_001171092               | CLDN2             | 9075         | 42.58  | 3.15E-07 | 6.5011 | 7.68E-07 | ctrl - P10; P2 - ctrl; P3 - ctrl; ctrl - P8; P11 - P10; P2 - P10; P3 - P10; P8 - P10; P2 - P11; P11 - P8; P2 - P8; P3 - P8                       |
| TC1500006785.hg.1 | TC1500006785.hg.1 | NM_001039841               | ARHGAP11B         | 89839        | 42.559 | 3.16E-07 | 6.4999 | 7.69E-07 | ctrl - P11; ctrl - P2; ctrl - P3; P8 - ctrl; P10 - P11; P10 - P2; P10 - P3; P8 - P10; P2 - P11; P3 - P11; P8 - P11; P8 - P2; P8 - P3             |
| TC0800009178.hg.1 | TC0800009178.hg.1 | NR_126398                  | C8orf31           | 286122       | 42.54  | 3.17E-07 | 6.4989 | 7.70E-07 | P10 - ctrl; P11 - ctrl; P3 - ctrl; P8 - ctrl; P10 - P11; P10 - P2; P11 - P2; P3 - P11; P8 - P11; P3 - P2; P8 - P2; P8 - P3                       |
| TC1200009179.hg.1 | TC1200009179.hg.1 | paforby.aAug10-unspliced   | paforby           | NA           | 42.38  | 3.24E-07 | 6.4899 | 7.85E-07 | P10 - ctrl; P11 - ctrl; P2 - ctrl; P3 - ctrl; P8 - ctrl; P10 - P11; P10 - P2; P10 - P3; P11 - P2; P8 - P11; P3 - P2; P8 - P2; P8 - P3            |
| TC1000008995.hg.1 | TC1000008995.hg.1 | NM_001276282               | ATRN1             | 26033        | 42.31  | 3.27E-07 | 6.4859 | 7.92E-07 | P10 - ctrl; ctrl - P11; ctrl - P3; P8 - ctrl; P10 - P11; P10 - P2; P10 - P3; P10 - P8; P2 - P11; P8 - P11; P2 - P3; P8 - P2; P8 - P3             |
| TC0300007190.hg.1 | TC0300007190.hg.1 | swerfawbo.aAug10-unspliced | swerfawbo         | NA           | 42.27  | 3.28E-07 | 6.4835 | 7.95E-07 | ctrl - P10; ctrl - P11; ctrl - P3; ctrl - P8; P11 - P10; P2 - P10; P3 - P10; P2 - P11; P11 - P8; P2 - P3; P2 - P8; P3 - P8                       |
| TC1100012787.hg.1 | TC1100012787.hg.1 | staglybu.aAug10-unspliced  | staglybu          | NA           | 42.20  | 3.31E-07 | 6.4797 | 8.02E-07 | ctrl - P10; ctrl - P2; ctrl - P3; ctrl - P8; P11 - P10; P10 - P3; P11 - P2; P11 - P3; P11 - P8; P2 - P3                                          |
| TC1500009348.hg.1 | TC1500009348.hg.1 | NM_000138                  | FBN1              | 2200         | 42.15  | 3.34E-07 | 6.4767 | 8.06E-07 | P10 - ctrl; P3 - ctrl; P8 - ctrl; P10 - P11; P10 - P2; P3 - P10; P8 - P10; P11 - P2; P3 - P11; P8 - P11; P3 - P2; P8 - P2                        |
| TC1100011766.hg.1 | TC1100011766.hg.1 | NA                         | NA                | NA           | 42.14  | 3.34E-07 | 6.4761 | 8.07E-07 | ctrl - P10; ctrl - P11; ctrl - P8; P11 - P10; P2 - P10; P3 - P10; P3 - P11; P11 - P8; P2 - P8; P3 - P8                                           |
| TC0700008617.hg.1 | TC0700008617.hg.1 | NM_020979                  | SH2B2             | 10603        | 42.13  | 3.35E-07 | 6.4756 | 8.07E-07 | P10 - ctrl; P11 - ctrl; P3 - ctrl; P8 - ctrl; P10 - P11; P10 - P2; P10 - P3; P11 - P2; P8 - P11; P11 - P3; P2 - P2; P8 - P2; P8 - P3             |
| TC1500010018.hg.1 | TC1500010018.hg.1 | NM_001146029               | SEMA7A            | 8482         | 42.04  | 3.39E-07 | 6.4701 | 8.16E-07 | P10 - ctrl; P3 - ctrl; P8 - ctrl; P10 - P11; P10 - P2; P8 - P10; P3 - P11; P8 - P11; P3 - P2; P8 - P2; P8 - P3                                   |
| TC0100012299.hg.1 | TC0100012299.hg.1 | NA                         | NA                | NA           | 42.03  | 3.39E-07 | 6.4697 | 8.16E-07 | ctrl - P10; ctrl - P11; P2 - ctrl; ctrl - P3; ctrl - P8; P2 - P10; P10 - P8; P2 - P11; P11 - P8; P2 - P3; P2 - P8                                |
| TC0500009035.hg.1 | TC0500009035.hg.1 | NM_001040129               | SPINK13           | 153218       | 41.99  | 3.41E-07 | 6.4672 | 8.20E-07 | ctrl - P10; ctrl - P11; ctrl - P2; P3 - ctrl; ctrl - P8; P3 - P10; P3 - P11; P3 - P2; P3 - P8                                                    |
| TC0700007001.hg.1 | TC0700007001.hg.1 | NR_122069                  | HOXA-AS2          | 285943       | 41.94  | 3.43E-07 | 6.4644 | 8.25E-07 | ctrl - P10; ctrl - P2; ctrl - P3; ctrl - P8; P11 - P10; P10 - P3; P11 - P2; P11 - P3; P11 - P8; P2 - P3; P8 - P3                                 |
| TC0200012917.hg.1 | TC0200012917.hg.1 | NA                         | NA                | NA           | 41.93  | 3.44E-07 | 6.464  | 8.25E-07 | ctrl - P10; ctrl - P2; P3 - ctrl; ctrl - P8; P11 - P10; P2 - P10; P3 - P10; P11 - P2; P11 - P8; P3 - P2; P2 - P8; P3 - P8                        |
| TC2000009295.hg.1 | TC2000009295.hg.1 | sperpey.aAug10-unspliced   | sperpey           | NA           | 41.89  | 3.45E-07 | 6.4616 | 8.29E-07 | ctrl - P10; ctrl - P11; ctrl - P3; ctrl - P8; P2 - P10; P3 - P10; P10 - P8; P2 - P11; P3 - P11; P11 - P8; P2 - P3; P2 - P8; P3 - P8              |
| TC0500012567.hg.1 | TC0500012567.hg.1 | NM_032385                  | FAXDC2            | 10826        | 41.86  | 3.47E-07 | 6.46   | 8.30E-07 | ctrl - P10; ctrl - P2; ctrl - P3; ctrl - P8; P11 - P10; P2 - P10; P3 - P10; P8 - P10; P11 - P2; P11 - P3; P11 - P8; P2 - P3; P2 - P8             |
| TC0600007700.hg.1 | TC0600007700.hg.1 | NM_002263                  | KIFC1             | 3833         | 41.86  | 3.47E-07 | 6.4598 | 8.30E-07 | P10 - ctrl; ctrl - P11; ctrl - P2; P8 - ctrl; P10 - P11; P10 - P2; P10 - P3; P8 - P10; P3 - P11; P8 - P11; P3 - P2; P8 - P2; P8 - P3             |
| TC1400006437.hg.1 | TC1400006437.hg.1 | NA                         | NA                | NA           | 41.84  | 3.48E-07 | 6.4589 | 8.31E-07 | ctrl - P11; P2 - ctrl; P3 - ctrl; ctrl - P8; P10 - P11; P2 - P10; P3 - P10; P10 - P8; P2 - P11; P3 - P11; P2 - P3; P2 - P8; P3 - P8              |
| TC0700008503.hg.1 | TC0700008503.hg.1 | uc032zyw.2                 | AC069294.1        | NA           | 41.80  | 3.50E-07 | 6.4562 | 8.36E-07 | ctrl - P10; ctrl - P11; P2 - ctrl; ctrl - P3; ctrl - P8; P11 - P10; P2 - P10; P3 - P10; P2 - P11; P11 - P8; P2 - P3; P2 - P8                     |
| TC1600007880.hg.1 | TC1600007880.hg.1 | uc059uez.1                 | snoU13            | NA           | 41.67  | 3.56E-07 | 6.4489 | 8.49E-07 | ctrl - P10; ctrl - P11; ctrl - P3; ctrl - P8; P11 - P10; P2 - P10; P10 - P3; P2 - P11; P11 - P3; P11 - P8; P2 - P3; P2 - P8                      |
| TC0100008517.hg.1 | TC0100008517.hg.1 | NM_001134673               | NFIA              | 1p31.3-p31.2 | 41.60  | 3.59E-07 | 6.4449 | 8.56E-07 | ctrl - P10; P11 - ctrl; ctrl - P2; ctrl - P3; ctrl - P8; P11 - P10; P2 - P10; P3 - P10; P8 - P10; P11 - P2; P11 - P3; P11 - P8; P2 - P8; P3 - P8 |
| TC0600011515.hg.1 | TC0600011515.hg.1 | ENST00000580587.1          | XXbac-BPG181M17.6 |              | 41.53  | 3.63E-07 | 6.4404 | 8.64E-07 | P10 - ctrl; P11 - ctrl; P3 - ctrl; P8 - ctrl; P10 - P2; P10 - P3; P11 - P2; P11 - P3; P3 - P2; P8 - P2; P8 - P3                                  |
| TC0500010540.hg.1 | TC0500010540.hg.1 | NM_001127671               | LIFR              | 3977         | 41.47  | 3.65E-07 | 6.4372 | 8.70E-07 | ctrl - P10; ctrl - P11; ctrl - P2; ctrl - P3; ctrl - P8; P11 - P10; P2 - P10; P3 - P10; P10 - P8; P11 - P3; P11 - P8; P2 - P8; P3 - P8           |
| TC1500007815.hg.1 | TC1500007815.hg.1 | gawzoybu.aAug10-unspliced  | gawzoybu          | NA           | 41.42  | 3.68E-07 | 6.4341 | 8.75E-07 | ctrl - P10; ctrl - P11; P2 - ctrl; ctrl - P3; ctrl - P8; P11 - P10; P2 - P10; P3 - P10; P10 - P8; P2 - P11; P11 - P8; P2 - P3; P2 - P8; P3 - P8  |
| TC0200016583.hg.1 | TC0200016583.hg.1 | NR_131917                  | LOC105747689      | 1.06E+08     | 41.36  | 3.71E-07 | 6.4306 | 8.81E-07 | ctrl - P10; ctrl - P11; ctrl - P8; P2 - P10; P3 - P10; P2 - P11; P3 - P11; P2 - P3; P2 - P8; P3 - P8                                             |
| TC2200007496.hg.1 | TC2200007496.hg.1 | jeybar.aAug10-unspliced    | jeybar            | NA           | 41.28  | 3.75E-07 | 6.4259 | 8.90E-07 | ctrl - P10; ctrl - P11; ctrl - P3; ctrl - P8; P11 - P10; P2 - P10; P3 - P10; P10 - P8; P2 - P11; P11 - P8; P2 - P3; P2 - P8; P3 - P8             |
| TC1100011933.hg.1 | TC1100011933.hg.1 | TUBA1B.1.aAug10            | TUBA1B.1          | NA           | 41.27  | 3.76E-07 | 6.42   | 8.90E-07 | P10 - ctrl; P11 - ctrl; P3 - ctrl; P8 - ctrl; P10 - P11; P10 - P2; P10 - P3; P8 - P11; P8 - P2; P8 - P3                                          |



|                           |                   |                                |              |         |       |          |        |          |                                                                                                                                                 |
|---------------------------|-------------------|--------------------------------|--------------|---------|-------|----------|--------|----------|-------------------------------------------------------------------------------------------------------------------------------------------------|
| TC0300013336.hg.1         | TC0300013336.hg.1 | NM_014398                      | LAMP3        | 27074   | 41.17 | 3.81E-07 | 6.4191 | 9.02E-07 | P10 - ctrl; P11 - ctrl; P3 - ctrl; P8 - ctrl; P10 - P2; P8 - P10; P11 - P2; P3 - P11; P8 - P11; P3 - P2; P8 - P2                                |
| TC0200011902.hg.1         | TC0200011902.hg.1 | chaneebo.aAug10-<br>unspliced  | chaneebo     | NA      | 41.15 | 3.82E-07 | 6.4185 | 9.03E-07 | ctrl - P10; ctrl - P11; ctrl - P3; ctrl - P8; P11 - P10; P2 - P10; P10 - P8; P2 - P11; P11 - P8; P2 - P3; P2 - P8; P3 - P8                      |
| TC0400007806.hg.1         | TC0400007806.hg.1 | NM_001144756                   | NPFFR2       | 10886   | 41.15 | 3.82E-07 | 6.4181 | 9.03E-07 | P10 - ctrl; ctrl - P2; P3 - ctrl; P8 - ctrl; P10 - P11; P10 - P2; P8 - P10; P11 - P2; P3 - P11; P8 - P11; P3 - P2; P8 - P2; P8 - P3             |
| TC0700008073.hg.1         | TC0700008073.hg.1 | NM_000941                      | POR          | 5447    | 41.1  | 3.85E-07 | 6.415  | 9.08E-07 | P10 - ctrl; P11 - ctrl; ctrl - P2; P3 - ctrl; P8 - ctrl; P10 - P11; P10 - P2; P10 - P3; P10 - P8; P11 - P2; P8 - P11; P3 - P2; P8 - P2; P8 - P3 |
| TC1100010747.hg.1         | TC1100010747.hg.1 | gawny.aAug10-<br>unspliced     | gawny        | NA      | 41.09 | 3.85E-07 | 6.4148 | 9.08E-07 | ctrl - P10; ctrl - P11; ctrl - P3; ctrl - P8; P2 - P10; P3 - P10; P2 - P11; P3 - P11; P2 - P3; P2 - P8; P3 - P8                                 |
| TC1500006580.hg.1         | TC1500006580.hg.1 | NR_003294                      | SNORD115-2   | 15q11.2 | 41.06 | 3.87E-07 | 6.4128 | 9.11E-07 | P10 - ctrl; P3 - ctrl; P8 - ctrl; P10 - P11; P10 - P2; P3 - P10; P3 - P11; P8 - P11; P3 - P2; P8 - P2; P3 - P8                                  |
| TC0500011072.hg.1         | TC0500011072.hg.1 | chostarby.aAug10-<br>unspliced | chostarby    | NA      | 41.06 | 3.87E-07 | 6.4126 | 9.11E-07 | ctrl - P10; ctrl - P11; ctrl - P3; ctrl - P8; P11 - P10; P2 - P10; P2 - P11; P11 - P8; P2 - P3; P2 - P8; P3 - P8                                |
| TC0600011112.hg.1         | TC0600011112.hg.1 | NM_005074                      | SLC17A1      | 6568    | 40.98 | 3.91E-07 | 6.4083 | 9.19E-07 | ctrl - P10; ctrl - P11; P2 - ctrl; P3 - ctrl; ctrl - P8; P11 - P10; P2 - P10; P3 - P10; P2 - P11; P3 - P11; P2 - P8; P3 - P8                    |
| TC2000009922.hg.1         | TC2000009922.hg.1 | NM_001199264                   | SGK2         | 20q13.2 | 40.88 | 3.96E-07 | 6.4025 | 9.31E-07 | ctrl - P10; P11 - ctrl; ctrl - P2; ctrl - P3; ctrl - P8; P11 - P10; P2 - P10; P3 - P10; P11 - P2; P11 - P3; P11 - P8; P3 - P2; P3 - P8          |
| HTA2-pos-2985912_st       | 23150249          | NA                             | NA           | NA      | 40.81 | 4.00E-07 | 6.3981 | 9.39E-07 | ctrl - P10; ctrl - P11; ctrl - P3; ctrl - P8; P11 - P10; P2 - P10; P3 - P10; P2 - P11; P11 - P8; P2 - P3; P2 - P8; P3 - P8                      |
| TC0700010370.hg.1         | TC0700010370.hg.1 | NA                             | NA           | NA      | 40.72 | 4.05E-07 | 6.3925 | 9.50E-07 | ctrl - P11; P2 - ctrl; P3 - ctrl; ctrl - P8; P10 - P11; P2 - P10; P3 - P10; P10 - P8; P2 - P11; P3 - P11; P2 - P3; P2 - P8; P3 - P8             |
| TC0200009344.hg.1         | TC0200009344.hg.1 | NM_001258304                   | CCDC74A      | 90557   | 40.63 | 4.10E-07 | 6.3871 | 9.61E-07 | ctrl - P10; ctrl - P2; ctrl - P3; ctrl - P8; P11 - P10; P10 - P3; P11 - P2; P11 - P3; P11 - P8; P8 - P2; P8 - P3                                |
| TC0100009670.hg.1         | TC0100009670.hg.1 | NA                             | NA           | NA      | 40.59 | 4.12E-07 | 6.3851 | 9.65E-07 | ctrl - P10; ctrl - P11; ctrl - P3; ctrl - P8; P10 - P11; P2 - P10; P3 - P10; P10 - P8; P2 - P11; P3 - P11; P2 - P3; P2 - P8; P3 - P8            |
| TC2100007806.hg.1         | TC2100007806.hg.1 | smuvee.aAug10-<br>unspliced    | smuvee       | NA      | 40.50 | 4.18E-07 | 6.3793 | 9.77E-07 | ctrl - P10; ctrl - P11; ctrl - P3; ctrl - P8; P2 - P10; P3 - P10; P2 - P11; P3 - P11; P2 - P3; P2 - P8; P3 - P8                                 |
| TC0900010570.hg.1         | TC0900010570.hg.1 | NM_001244959                   | FRMD3        | 257019  | 40.44 | 4.21E-07 | 6.3761 | 9.83E-07 | ctrl - P10; ctrl - P11; ctrl - P2; ctrl - P8; P11 - P10; P2 - P10; P3 - P10; P8 - P10; P3 - P11; P11 - P8; P3 - P2; P2 - P8; P3 - P8            |
| TC0600007282.hg.1         | TC0600007282.hg.1 | NM_003522                      | HIST1H2BF    | 8343    | 40.44 | 4.21E-07 | 6.3757 | 9.83E-07 | P10 - ctrl; ctrl - P2; P8 - ctrl; P10 - P11; P10 - P2; P10 - P3; P11 - P2; P8 - P11; P3 - P2; P8 - P2; P8 - P3                                  |
| TC1100012687.hg.1         | TC1100012687.hg.1 | NM_001308027                   | MSANTD2      | 11q24.2 | 40.37 | 4.25E-07 | 6.3719 | 9.91E-07 | ctrl - P10; ctrl - P11; ctrl - P3; ctrl - P8; P11 - P10; P2 - P10; P2 - P11; P11 - P3; P11 - P8; P2 - P3; P2 - P8                               |
| TC1300009783.hg.1         | TC1300009783.hg.1 | mimeri.aAug10-<br>unspliced    | mimeri       | NA      | 40.35 | 4.26E-07 | 6.3703 | 9.94E-07 | ctrl - P10; ctrl - P11; ctrl - P3; ctrl - P8; P2 - P10; P3 - P10; P2 - P11; P11 - P8; P2 - P3; P2 - P8; P3 - P8                                 |
| TC1200011992.hg.1         | TC1200011992.hg.1 | vubler.aAug10-<br>unspliced    | vubler       | NA      | 40.23 | 4.33E-07 | 6.3632 | 1.01E-06 | P10 - ctrl; P11 - ctrl; P3 - ctrl; P8 - ctrl; P10 - P11; P10 - P2; P11 - P2; P8 - P11; P3 - P2; P8 - P2                                         |
| TC1000011952.hg.1         | TC1000011952.hg.1 | porpyby.aAug10-<br>unspliced   | porpyby      | NA      | 40.40 | 4.39E-07 | 6.3576 | 1.02E-06 | ctrl - P10; ctrl - P11; ctrl - P3; ctrl - P8; P11 - P10; P2 - P10; P3 - P10; P2 - P11; P11 - P3; P11 - P8; P2 - P3; P2 - P8; P3 - P8            |
| TC2200006540.hg.1         | TC2200006540.hg.1 | NM_017414                      | USP18        | 11274   | 40.08 | 4.43E-07 | 6.354  | 1.03E-06 | P10 - ctrl; P3 - ctrl; P8 - ctrl; P10 - P11; P10 - P2; P3 - P11; P8 - P11; P3 - P2; P8 - P2                                                     |
| TC1900011382.hg.1         | TC1900011382.hg.1 | hsa_circ_0000954               | MYADM        | NA      | 40.04 | 4.45E-07 | 6.3516 | 1.03E-06 | P10 - ctrl; P11 - ctrl; P3 - ctrl; P8 - ctrl; P10 - P11; P10 - P2; P10 - P3; P11 - P2; P8 - P11; P3 - P2; P8 - P2; P8 - P3                      |
| HTA2-pos-PSR07002495.hg.1 | 23151383          | NA                             | NA           | NA      | 39.98 | 4.48E-07 | 6.3484 | 1.04E-06 | ctrl - P10; ctrl - P11; ctrl - P3; ctrl - P8; P11 - P10; P2 - P10; P3 - P10; P2 - P11; P11 - P8; P2 - P3; P2 - P8; P3 - P8                      |
| TC0300011888.hg.1         | TC0300011888.hg.1 | NA                             | NA           | NA      | 39.87 | 4.55E-07 | 6.3417 | 1.06E-06 | P10 - ctrl; P8 - ctrl; P10 - P11; P10 - P2; P10 - P3; P10 - P8; P8 - P11; P8 - P2; P8 - P3                                                      |
| TC0200009895.hg.1         | TC0200009895.hg.1 | NM_001256126                   | CERS6        | 253782  | 39.70 | 4.67E-07 | 6.3309 | 1.08E-06 | ctrl - P10; ctrl - P2; ctrl - P8; P11 - P10; P2 - P10; P3 - P10; P8 - P10; P11 - P2; P11 - P8; P3 - P2; P2 - P3; P8 - P8                        |
| TC0200012989.hg.1         | TC0200012989.hg.1 | wuklar.aAug10-<br>unspliced    | wuklar       | NA      | 39.65 | 4.70E-07 | 6.3282 | 1.09E-06 | ctrl - P10; ctrl - P11; ctrl - P3; ctrl - P8; P11 - P10; P2 - P10; P3 - P10; P2 - P11; P11 - P8; P2 - P3; P2 - P8; P3 - P8                      |
| TC0900011662.hg.1         | TC0900011662.hg.1 | kortuby.aAug10-<br>unspliced   | kortuby      | NA      | 39.57 | 4.75E-07 | 6.3234 | 1.10E-06 | P10 - ctrl; P11 - ctrl; P3 - ctrl; P8 - ctrl; P10 - P11; P10 - P2; P10 - P3; P11 - P2; P3 - P11; P8 - P11; P3 - P2; P8 - P2; P8 - P3            |
| TC1500007593.hg.1         | TC1500007593.hg.1 | NR_002756                      | RNU5A-1      | 26831   | 39.55 | 4.76E-07 | 6.322  | 1.10E-06 | P11 - ctrl; P2 - ctrl; P11 - P10; P2 - P10; P2 - P11; P11 - P3; P11 - P8; P2 - P3; P2 - P8                                                      |
| TC0100016693.hg.1         | TC0100016693.hg.1 | ENST00000623474                | RP4-635A23.6 | NA      | 39.48 | 4.81E-07 | 6.3177 | 1.11E-06 | ctrl - P10; ctrl - P11; ctrl - P3; ctrl - P8; P2 - P10; P2 - P11; P2 - P3; P2 - P8                                                              |
| TC1500006585.hg.1         | TC1500006585.hg.1 | NR_003300                      | SNORD115-8   | 15q11.2 | 39.45 | 4.83E-07 | 6.3156 | 1.11E-06 | P10 - ctrl; P11 - ctrl; P3 - ctrl; P8 - ctrl; P10 - P11; P10 - P2; P3 - P10; P3 - P11; P8 - P11; P3 - P2; P8 - P2; P3 - P8                      |
| TC1100010456.hg.1         | TC1100010456.hg.1 | NM_000280                      | PAX6         | 5080    | 39.38 | 4.88E-07 | 6.3116 | 1.12E-06 | P11 - ctrl; ctrl - P2; P3 - ctrl; P11 - P10; P10 - P2; P3 - P10; P11 - P2; P11 - P8; P3 - P2; P3 - P8                                           |
| TC0200012343.hg.1         | TC0200012343.hg.1 | steelo.aAug10-<br>unspliced    | steelo       | NA      | 39.30 | 4.94E-07 | 6.3064 | 1.14E-06 | P10 - ctrl; P2 - ctrl; P10 - P11; P2 - P10; P10 - P3; P10 - P8; P2 - P11; P2 - P3; P2 - P8                                                      |
| TC0100018300.hg.1         | TC0100018300.hg.1 | NM_001261464                   | ADAM15       | 8751    | 39.24 | 4.98E-07 | 6.3031 | 1.14E-06 | P10 - ctrl; ctrl - P2; P3 - ctrl; P8 - ctrl; P10 - P11; P10 - P2; P11 - P2; P3 - P11; P8 - P11; P3 - P2; P8 - P2; P8 - P3                       |

|                      |                   |                                |               |          |             |              |            |              |                                                                                                                                       |
|----------------------|-------------------|--------------------------------|---------------|----------|-------------|--------------|------------|--------------|---------------------------------------------------------------------------------------------------------------------------------------|
| TC0400010128.hg.1    | TC0400010128.hg.1 | smusmawby.aAug10-<br>unspliced | smusmawby     | NA       | 39.23<br>1  | 4.99<br>E-07 | 6.30<br>2  | 1.15<br>E-06 | ctrl - P10; ctrl - P11; ctrl - P3; ctrl - P8; P11 - P10; P2 - P10; P3 - P10; P2 - P11; P11 - P8; P2 - P3; P2 - P8; P3 - P8            |
| TC0100009149.hg.1    | TC0100009149.hg.1 | PTBP2.oAug10-<br>unspliced     | PTBP2         | NA       | 39.17<br>7  | 5.03<br>E-07 | 6.29<br>86 | 1.15<br>E-06 | ctrl - P10; ctrl - P11; P2 - ctrl; ctrl - P3; ctrl - P8; P2 - P10; P3 - P10; P2 - P11; P11 - P8; P2 - P3; P2 - P8; P3 - P8            |
| TC1100008008.hg.1    | TC1100008008.hg.1 | NM_002689                      | POLA2         | 23649    | 39.17<br>2  | 5.03<br>E-07 | 6.29<br>83 | 1.15<br>E-06 | ctrl - P11; ctrl - P2; P3 - ctrl; P8 - ctrl; P10 - P11; P10 - P2; P3 - P10; P8 - P10; P3 - P11; P8 - P11; P3 - P2; P8 - P2            |
| TC1100010131.hg.1    | TC1100010131.hg.1 | ENST00000527288.1              | RP11-265D17.2 |          | 39.10<br>8  | 5.08<br>E-07 | 6.29<br>44 | 1.16<br>E-06 | P10 - ctrl; P8 - ctrl; P10 - P11; P10 - P2; P10 - P3; P8 - P11; P8 - P2; P8 - P3                                                      |
| TC0X00009917.hg.1    | TC0X00009917.hg.1 | NM_001199687                   | EDA2R         | 60401    | 39.01<br>9  | 5.14<br>E-07 | 6.28<br>89 | 1.18<br>E-06 | P10 - ctrl; P11 - ctrl; P3 - ctrl; P8 - ctrl; P10 - P11; P10 - P2; P10 - P3; P11 - P2; P8 - P11; P3 - P2; P8 - P2; P8 - P3            |
| TC0800011305.hg.1    | TC0800011305.hg.1 | NM_001040624                   | NCALD         | 83988    | 38.98<br>2  | 5.17<br>E-07 | 6.28<br>66 | 1.18<br>E-06 | P10 - ctrl; P3 - ctrl; P8 - ctrl; P10 - P11; P10 - P2; P10 - P3; P3 - P11; P8 - P11; P3 - P2; P8 - P2; P8 - P3                        |
| TC0900006657.hg.1    | TC0900006657.hg.1 | sposhaw.aAug10-<br>unspliced   | sposhaw       | NA       | 38.81<br>4  | 5.30<br>E-07 | 6.27<br>61 | 1.21<br>E-06 | ctrl - P10; ctrl - P11; P2 - ctrl; ctrl - P8; P2 - P10; P3 - P10; P10 - P8; P2 - P11; P3 - P11; P11 - P8; P2 - P3; P2 - P8; P3 - P8   |
| TC1400008189.hg.1    | TC1400008189.hg.1 | tamami.aAug10-<br>unspliced    | tamami        | NA       | 38.73<br>2  | 5.36<br>E-07 | 6.27<br>1  | 1.22<br>E-06 | ctrl - P10; ctrl - P11; ctrl - P3; ctrl - P8; P2 - P10; P3 - P10; P10 - P8; P2 - P11; P11 - P8; P2 - P3; P2 - P8; P3 - P8             |
| TC0600014191.hg.1    | TC0600014191.hg.1 | NM_001030060                   | SAMD5         | 389432   | 38.72<br>5  | 5.36<br>E-07 | 6.27<br>06 | 1.22<br>E-06 | P10 - ctrl; P2 - ctrl; P3 - ctrl; P8 - ctrl; P10 - P11; P10 - P2; P10 - P3; P2 - P11; P3 - P11; P8 - P11; P2 - P3; P8 - P3            |
| TC0700007694.hg.1    | TC0700007694.hg.1 | NA                             | NA            | NA       | 38.64<br>1  | 5.43<br>E-07 | 6.26<br>53 | 1.24<br>E-06 | P2 - ctrl; P3 - ctrl; ctrl - P8; P10 - P11; P2 - P10; P3 - P10; P10 - P8; P2 - P11; P3 - P11; P2 - P8; P3 - P8                        |
| TC1200012298.hg.1    | TC1200012298.hg.1 | ENST00000602741.1              | RP11-214K3.19 |          | 38.63<br>3  | 5.44<br>E-07 | 6.26<br>46 | 1.24<br>E-06 | ctrl - P10; ctrl - P11; P2 - ctrl; ctrl - P3; ctrl - P8; P2 - P10; P3 - P10; P2 - P11; P11 - P8; P2 - P3; P2 - P8; P3 - P8            |
| TC1700010440.hg.1    | TC1700010440.hg.1 | NM_001032278                   | MMP28         | 79148    | 38.50<br>1  | 5.54<br>E-07 | 6.25<br>65 | 1.26<br>E-06 | P10 - ctrl; P11 - ctrl; P3 - ctrl; P8 - ctrl; P10 - P2; P3 - P10; P11 - P2; P3 - P11; P8 - P11; P3 - P2; P8 - P2; P3 - P8             |
| TC0500011579.hg.1    | TC0500011579.hg.1 | NM_005668                      | ST8SIA4       | 7903     | 38.48<br>7  | 5.55<br>E-07 | 6.25<br>56 | 1.26<br>E-06 | P11 - ctrl; P2 - ctrl; P11 - P10; P2 - P10; P2 - P11; P11 - P3; P11 - P8; P2 - P3; P2 - P8                                            |
| TC0200014733.hg.1    | TC0200014733.hg.1 | NA                             | NA            | NA       | 38.43<br>7  | 5.59<br>E-07 | 6.25<br>25 | 1.27<br>E-06 | ctrl - P10; ctrl - P11; P2 - ctrl; ctrl - P3; ctrl - P8; P2 - P10; P2 - P11; P2 - P3; P2 - P8; P3 - P8                                |
| TC0300013555.hg.1    | TC0300013555.hg.1 | NM_178496                      | MB21D2        | 151963   | 38.28<br>3  | 5.72<br>E-07 | 6.24<br>28 | 1.30<br>E-06 | P10 - ctrl; ctrl - P2; ctrl - P3; P8 - ctrl; P10 - P11; P10 - P2; P10 - P3; P11 - P2; P11 - P3; P8 - P11; P3 - P2; P8 - P2; P8 - P3   |
| TC1700007167.hg.1    | TC1700007167.hg.1 | snovybu.aAug10-<br>unspliced   | snovybu       | NA       | 38.24<br>1  | 5.75<br>E-07 | 6.24<br>02 | 1.30<br>E-06 | ctrl - P10; ctrl - P11; P2 - ctrl; ctrl - P3; ctrl - P8; P11 - P10; P2 - P10; P3 - P10; P2 - P11; P11 - P8; P2 - P3; P2 - P8          |
| TC0900012180.hg.1    | TC0900012180.hg.1 | NM_001100876                   | PHYHD1        | 254295   | 38.23<br>5  | 5.76<br>E-07 | 6.23<br>98 | 1.30<br>E-06 | ctrl - P10; P11 - ctrl; ctrl - P2; ctrl - P8; P11 - P10; P3 - P10; P11 - P2; P11 - P3; P11 - P8; P3 - P2; P3 - P8                     |
| TC0200011507.hg.1    | TC0200011507.hg.1 | NA                             | NA            | NA       | 38.19<br>6  | 5.79<br>E-07 | 6.23<br>72 | 1.31<br>E-06 | ctrl - P10; ctrl - P11; ctrl - P2; ctrl - P8; P2 - P10; P3 - P10; P2 - P11; P3 - P11; P3 - P2; P2 - P8; P3 - P8                       |
| TC1000010851.hg.1    | TC1000010851.hg.1 | chawmyby.aAug10-<br>unspliced  | chawmyby      | NA       | 38.18<br>6  | 5.80<br>E-07 | 6.23<br>67 | 1.31<br>E-06 | ctrl - P10; ctrl - P11; ctrl - P3; ctrl - P8; P2 - P10; P10 - P8; P2 - P11; P3 - P11; P2 - P3; P2 - P8; P3 - P8                       |
| TC0X00008468.hg.1    | TC0X00008468.hg.1 | NM_001101357                   | CCDC160       | 347475   | 38.13<br>9  | 5.84<br>E-07 | 6.23<br>37 | 1.32<br>E-06 | ctrl - P10; ctrl - P11; ctrl - P2; ctrl - P3; ctrl - P8; P11 - P10; P2 - P10; P3 - P10; P11 - P3; P11 - P8; P2 - P3; P2 - P8; P3 - P8 |
| HTA2-pos-47421982_st | 23150845          | NA                             | NA            | NA       | 38.12<br>9  | 5.85<br>E-07 | 6.23<br>3  | 1.32<br>E-06 | ctrl - P10; ctrl - P11; ctrl - P3; ctrl - P8; P11 - P10; P2 - P10; P3 - P10; P2 - P11; P2 - P3; P2 - P8                               |
| TC1400006436.hg.1    | TC1400006436.hg.1 | NA                             | NA            | NA       | 38.12<br>7  | 5.85<br>E-07 | 6.23<br>29 | 1.32<br>E-06 | ctrl - P11; P2 - ctrl; P3 - ctrl; P10 - P11; P2 - P10; P3 - P10; P10 - P8; P2 - P11; P3 - P11; P2 - P3; P2 - P8; P3 - P8              |
| TC0800007672.hg.1    | TC0800007672.hg.1 | NM_052898                      | XKR4          | 114786   | 38.11<br>5  | 5.86<br>E-07 | 6.23<br>22 | 1.32<br>E-06 | ctrl - P11; P2 - ctrl; P3 - ctrl; ctrl - P8; P10 - P11; P2 - P10; P10 - P8; P2 - P11; P3 - P11; P2 - P8; P3 - P8                      |
| TC0900008053.hg.1    | TC0900008053.hg.1 | gawlar.aAug10-<br>unspliced    | gawlar        | NA       | 38.11<br>11 | 5.86<br>E-07 | 6.23<br>18 | 1.32<br>E-06 | ctrl - P10; ctrl - P11; P2 - ctrl; ctrl - P3; ctrl - P8; P2 - P10; P10 - P8; P2 - P11; P11 - P8; P2 - P3; P2 - P8; P3 - P8            |
| TC0200007908.hg.1    | TC0200007908.hg.1 | NM_018153                      | ANTXR1        | 84168    | 38.02<br>6  | 5.94<br>E-07 | 6.22<br>65 | 1.33<br>E-06 | ctrl - P10; ctrl - P2; ctrl - P3; ctrl - P8; P11 - P10; P10 - P8; P11 - P2; P11 - P3; P11 - P8; P2 - P8                               |
| TC1700010652.hg.1    | TC1700010652.hg.1 | NM_033032                      | KRTAP2-2      | 728279   | 38.00<br>7  | 5.95<br>E-07 | 6.22<br>53 | 1.34<br>E-06 | P10 - ctrl; P3 - ctrl; P8 - ctrl; P10 - P11; P10 - P2; P10 - P3; P8 - P10; P3 - P11; P8 - P11; P3 - P2; P8 - P2; P8 - P3              |
| TC0700008354.hg.1    | TC0700008354.hg.1 | ENST00000415536.1              | AC003092.1    |          | 37.95<br>7  | 6.00<br>E-07 | 6.22<br>21 | 1.35<br>E-06 | P10 - ctrl; P3 - ctrl; P8 - ctrl; P10 - P11; P10 - P2; P3 - P10; P8 - P10; P3 - P11; P8 - P11; P3 - P2; P8 - P2                       |
| TC0400006931.hg.1    | TC0400006931.hg.1 | gloygu.aAug10-<br>unspliced    | gloygu        | NA       | 37.90<br>3  | 6.04<br>E-07 | 6.21<br>87 | 1.35<br>E-06 | ctrl - P10; ctrl - P11; ctrl - P3; ctrl - P8; P11 - P10; P2 - P10; P3 - P10; P2 - P11; P11 - P3; P11 - P8; P2 - P3; P2 - P8; P3 - P8  |
| TC0X00006804.hg.1    | TC0X00006804.hg.1 | NA                             | NA            | NA       | 37.89<br>2  | 6.05<br>E-07 | 6.21<br>79 | 1.36<br>E-06 | ctrl - P10; ctrl - P11; ctrl - P3; ctrl - P8; P2 - P10; P3 - P10; P2 - P11; P3 - P11; P2 - P3; P2 - P8; P3 - P8                       |
| TC1000009674.hg.1    | TC1000009674.hg.1 | ENST00000478294                | LOC105376382  | 1.05E+08 | 37.88<br>7  | 6.06<br>E-07 | 6.21<br>76 | 1.36<br>E-06 | P3 - ctrl; P8 - ctrl; P10 - P2; P3 - P10; P8 - P10; P3 - P11; P8 - P11; P3 - P2; P8 - P2                                              |
| TC1000008395.hg.1    | TC1000008395.hg.1 | ENST00000354541.3              | RP11-149I23.3 |          | 37.86<br>3  | 6.08<br>E-07 | 6.21<br>61 | 1.36<br>E-06 | ctrl - P10; ctrl - P2; ctrl - P3; ctrl - P8; P11 - P10; P2 - P10; P11 - P2; P11 - P3; P11 - P8; P2 - P3; P2 - P8                      |
| TC0800007051.hg.1    | TC0800007051.hg.1 | NM_001105541                   | NEFM          | 4741     | 37.83<br>5  | 6.10<br>E-07 | 6.21<br>43 | 1.36<br>E-06 | ctrl - P10; ctrl - P11; ctrl - P2; ctrl - P8; P11 - P10; P2 - P10; P3 - P10; P11 - P2; P3 - P11; P11 - P8; P3 - P2; P2 - P8; P3 - P8  |
| TC0300006705.hg.1    | TC0300006705.hg.1 | NR_046084                      | SH3BP5-AS1    | 1.01E+08 | 37.80<br>3  | 6.13<br>E-07 | 6.21<br>22 | 1.37<br>E-06 | ctrl - P10; ctrl - P11; ctrl - P3; ctrl - P8; P11 - P10; P2 - P10; P3 - P10; P2 - P11; P11 - P8; P2 - P3; P2 - P8; P3 - P8            |

|                   |                   |                                        |                  |          |             |              |            |              |                                                                                                                                               |
|-------------------|-------------------|----------------------------------------|------------------|----------|-------------|--------------|------------|--------------|-----------------------------------------------------------------------------------------------------------------------------------------------|
| TC1600009927.hg.1 | TC1600009927.hg.1 | NA                                     | NA               | NA       | 37.76<br>7  | 6.17<br>E-07 | 6.21       | 1.37<br>E-06 | ctrl - P10; ctrl - P11; ctrl - P3; ctrl - P8; P2 - P10; P2 - P11; P11 - P8; P2 - P3; P2 - P8; P3 - P8                                         |
| TC1600009960.hg.1 | TC1600009960.hg.1 | NA                                     | NA               | NA       | 37.76<br>7  | 6.17<br>E-07 | 6.21       | 1.37<br>E-06 | ctrl - P10; ctrl - P11; ctrl - P3; ctrl - P8; P2 - P10; P2 - P11; P11 - P8; P2 - P3; P2 - P8; P3 - P8                                         |
| TC0500011013.hg.1 | TC0500011013.hg.1 | vostarby.aAug10-<br>unspliced          | vostarby         | NA       | 37.73<br>9  | 6.19<br>E-07 | 6.20<br>81 | 1.38<br>E-06 | ctrl - P10; ctrl - P11; ctrl - P3; ctrl - P8; P11 - P10; P2 - P10; P3 - P10; P2 - P11; P11 - P8; P2 - P3; P2 - P8; P3 - P8                    |
| TC0200012826.hg.1 | TC0200012826.hg.1 | ENST00000561559.1                      | RP11-568N6.1     |          | 37.70<br>8  | 6.22<br>E-07 | 6.20<br>62 | 1.38<br>E-06 | ctrl - P10; ctrl - P11; ctrl - P2; ctrl - P3; ctrl - P8; P11 - P10; P2 - P10; P10 - P3; P11 - P3; P11 - P8; P2 - P3; P2 - P8; P8 - P3         |
| TC0100014027.hg.1 | TC0100014027.hg.1 | rerparbu.aAug10-<br>unspliced          | rerparbu         | NA       | 37.69<br>1  | 6.24<br>E-07 | 6.20<br>51 | 1.39<br>E-06 | ctrl - P10; ctrl - P11; P2 - ctrl; ctrl - P3; ctrl - P8; P11 - P10; P2 - P10; P3 - P10; P2 - P11; P11 - P8; P2 - P3; P2 - P8; P3 - P8         |
| TC1700011421.hg.1 | TC1700011421.hg.1 | rawwey.aAug10-<br>unspliced            | rawwey           | NA       | 37.59<br>3  | 6.33<br>E-07 | 6.19<br>88 | 1.40<br>E-06 | ctrl - P10; ctrl - P11; P2 - ctrl; ctrl - P3; ctrl - P8; P2 - P10; P3 - P10; P2 - P11; P11 - P3; P2 - P3; P2 - P8; P3 - P8                    |
| TC0800007641.hg.1 | TC0800007641.hg.1 | NM_001286673                           | RGS20            | 8601     | 37.50<br>5  | 6.41<br>E-07 | 6.19<br>32 | 1.42<br>E-06 | P10 - ctrl; P3 - ctrl; P8 - ctrl; P10 - P11; P10 - P2; P3 - P11; P8 - P11; P3 - P2; P8 - P2; P8 - P3                                          |
| TC2200008036.hg.1 | TC2200008036.hg.1 | OTTHUMT00000075837                     | USP41            | 373856   | 37.43<br>3  | 6.48<br>E-07 | 6.18<br>85 | 1.44<br>E-06 | P10 - ctrl; P3 - ctrl; P8 - ctrl; P10 - P11; P10 - P2; P3 - P11; P8 - P11; P3 - P2; P8 - P2                                                   |
| TC0600007585.hg.1 | TC0600007585.hg.1 | NM_001289161                           | MICB             | 4277     | 37.37<br>42 | 6.49<br>E-07 | 6.18<br>77 | 1.44<br>E-06 | P10 - ctrl; ctrl - P2; P3 - ctrl; P8 - ctrl; P10 - P11; P10 - P2; P10 - P3; P8 - P10; P11 - P2; P3 - P11; P8 - P11; P3 - P2; P8 - P2; P8 - P3 |
| TC0900011875.hg.1 | TC0900011875.hg.1 | NR_023344                              | RNU6ATAC         | 1E+08    | 37.41<br>3  | 6.50<br>E-07 | 6.18<br>72 | 1.44<br>E-06 | ctrl - P10; P2 - ctrl; ctrl - P8; P11 - P10; P2 - P10; P3 - P10; P2 - P11; P11 - P8; P2 - P3; P2 - P8; P3 - P8                                |
| TC0100014952.hg.1 | TC0100014952.hg.1 | NR_034089                              | CCDC18-AS1       | 1E+08    | 37.40<br>5  | 6.51<br>E-07 | 6.18<br>67 | 1.44<br>E-06 | ctrl - P10; ctrl - P11; ctrl - P3; ctrl - P8; P11 - P10; P2 - P10; P3 - P10; P11 - P8; P2 - P3; P2 - P8; P3 - P8                              |
| TC1200009297.hg.1 | TC1200009297.hg.1 | feeforby.aAug10-<br>unspliced          | feeforby         |          | 37.35<br>3  | 6.56<br>E-07 | 6.18<br>33 | 1.45<br>E-06 | P10 - ctrl; P11 - ctrl; P3 - ctrl; P8 - ctrl; P10 - P11; P10 - P2; P10 - P3; P11 - P2; P8 - P11; P11 - P3; P2 - P8; P2 - P8; P3 - P8          |
| TC0500009377.hg.1 | TC0500009377.hg.1 | NM_017785                              | SPDL1            | 54908    | 37.25<br>7  | 6.65<br>E-07 | 6.17<br>71 | 1.47<br>E-06 | P10 - ctrl; P3 - ctrl; P8 - ctrl; P10 - P11; P10 - P2; P8 - P10; P3 - P11; P8 - P11; P3 - P2; P8 - P2; P8 - P3                                |
| TC0X00007243.hg.1 | TC0X00007243.hg.1 | uc022bwf.2                             | AC231645.1       | NA       | 37.20<br>6  | 6.70<br>E-07 | 6.17<br>38 | 1.48<br>E-06 | ctrl - P10; ctrl - P11; ctrl - P2; ctrl - P3; ctrl - P8; P11 - P10; P2 - P10; P11 - P3; P11 - P8; P2 - P3; P2 - P8                            |
| TC0700010537.hg.1 | TC0700010537.hg.1 | NA                                     | NA               | NA       | 37.17<br>9  | 6.73<br>E-07 | 6.17<br>21 | 1.48<br>E-06 | ctrl - P10; ctrl - P11; ctrl - P3; ctrl - P8; P11 - P10; P2 - P10; P3 - P10; P2 - P11; P11 - P8; P2 - P3; P2 - P8; P3 - P8                    |
| TC0400006665.hg.1 | TC0400006665.hg.1 | zawku.aAug10-<br>unspliced             | zawku            | NA       | 37.11<br>8  | 6.79<br>E-07 | 6.16<br>81 | 1.49<br>E-06 | ctrl - P10; P11 - ctrl; ctrl - P3; ctrl - P8; P11 - P10; P2 - P10; P3 - P10; P11 - P2; P11 - P3; P11 - P8; P2 - P3; P2 - P8; P3 - P8          |
| TC1700006647.hg.1 | TC1700006647.hg.1 | lywaw.aAug10-<br>unspliced             | lywaw            | NA       | 37.08<br>9  | 6.82<br>E-07 | 6.16<br>62 | 1.50<br>E-06 | ctrl - P10; ctrl - P11; ctrl - P3; ctrl - P8; P2 - P10; P3 - P10; P2 - P11; P11 - P8; P2 - P3; P2 - P8; P3 - P8                               |
| TC1500008525.hg.1 | TC1500008525.hg.1 | poychubu.aAug10-<br>unspliced          | poychubu         | NA       | 37.07<br>5  | 6.84<br>E-07 | 6.16<br>5  | 1.50<br>E-06 | ctrl - P10; ctrl - P11; P2 - ctrl; ctrl - P3; ctrl - P8; P11 - P10; P2 - P10; P3 - P10; P2 - P11; P11 - P8; P2 - P3; P2 - P8; P3 - P8         |
| TC0500011852.hg.1 | TC0500011852.hg.1 | NM_001178102                           | LOX              | 4015     | 37.04<br>9  | 6.86<br>E-07 | 6.16<br>36 | 1.51<br>E-06 | P10 - ctrl; P3 - ctrl; P8 - ctrl; P10 - P11; P10 - P2; P3 - P11; P8 - P11; P3 - P2; P8 - P2                                                   |
| TC0200008981.hg.1 | TC0200008981.hg.1 | doswawby.aAug10-<br>unspliced          | doswawby         | NA       | 36.97<br>7  | 6.94<br>E-07 | 6.15<br>89 | 1.52<br>E-06 | ctrl - P10; ctrl - P11; ctrl - P2; ctrl - P3; ctrl - P8; P11 - P10; P2 - P10; P3 - P10; P2 - P11; P11 - P8; P2 - P3; P2 - P8; P3 - P8         |
| TC1100008401.hg.1 | TC1100008401.hg.1 | zeekarby.aAug10                        | zeekarby         | NA       | 36.93<br>2  | 6.98<br>E-07 | 6.15<br>6  | 1.53<br>E-06 | P10 - ctrl; P3 - ctrl; P8 - ctrl; P10 - P11; P10 - P2; P10 - P3; P3 - P11; P8 - P11; P3 - P2; P8 - P2; P8 - P3                                |
| TC0100017849.hg.1 | TC0100017849.hg.1 | NM_019891                              | ERO1B            | 56605    | 36.92<br>8  | 6.99<br>E-07 | 6.15<br>57 | 1.53<br>E-06 | ctrl - P10; ctrl - P2; ctrl - P3; ctrl - P8; P11 - P10; P3 - P10; P11 - P2; P11 - P3; P11 - P8; P3 - P2; P3 - P8                              |
| TC1000010102.hg.1 | TC1000010102.hg.1 | joymorby.aAug10-<br>unspliced          | joymorby         | NA       | 36.91<br>7  | 7.00<br>E-07 | 6.15<br>5  | 1.53<br>E-06 | ctrl - P10; ctrl - P11; ctrl - P3; ctrl - P8; P11 - P10; P2 - P10; P10 - P8; P2 - P11; P11 - P8; P2 - P3; P2 - P8; P3 - P8                    |
| TC0100015417.hg.1 | TC0100015417.hg.1 | NM_001253849                           | VTGN1            | 79679    | 36.91<br>4  | 7.00<br>E-07 | 6.15<br>48 | 1.53<br>E-06 | P10 - ctrl; P11 - ctrl; ctrl - P2; P3 - ctrl; P8 - ctrl; P10 - P11; P10 - P2; P10 - P3; P11 - P2; P3 - P2; P8 - P2; P8 - P3                   |
| TC0600011973.hg.1 | TC0600011973.hg.1 | gleebloy.aAug10-<br>unspliced          | gleebloy         | NA       | 36.88<br>8  | 7.03<br>E-07 | 6.15<br>31 | 1.53<br>E-06 | P10 - ctrl; ctrl - P11; P2 - ctrl; P3 - ctrl; P8 - ctrl; P10 - P11; P2 - P10; P3 - P10; P2 - P11; P3 - P11; P8 - P11; P2 - P8; P3 - P8        |
| TC1200010130.hg.1 | TC1200010130.hg.1 | NM_001261414                           | SOX5             | 6660     | 36.87<br>6  | 7.04<br>E-07 | 6.15<br>23 | 1.54<br>E-06 | ctrl - P10; ctrl - P3; ctrl - P8; P11 - P10; P2 - P10; P10 - P3; P11 - P3; P11 - P8; P2 - P3; P2 - P8                                         |
| TC0X00008826.hg.1 | TC0X00008826.hg.1 | hsa_circ_0002730                       | FLNA             | NA       | 36.76<br>6  | 7.16<br>E-07 | 6.14<br>51 | 1.56<br>E-06 | P10 - ctrl; P11 - ctrl; P3 - ctrl; P8 - ctrl; P10 - P11; P10 - P2; P10 - P3; P11 - P2; P8 - P11; P3 - P2; P8 - P2; P8 - P3                    |
| TC0400010503.hg.1 | TC0400010503.hg.1 | NR_039966                              | MIR4802          | 1.01E+08 | 36.75<br>3  | 7.17<br>E-07 | 6.14<br>43 | 1.56<br>E-06 | ctrl - P10; P2 - ctrl; ctrl - P3; ctrl - P8; P11 - P10; P2 - P10; P10 - P3; P2 - P11; P11 - P3; P11 - P8; P2 - P3; P2 - P8                    |
| TC0100007907.hg.1 | TC0100007907.hg.1 | MACF1andKIAA0754.vpAug10-<br>unspliced | MACF1andKIAA0754 | NA       | 36.7<br>7   | 7.23<br>E-07 | 6.14<br>08 | 1.57<br>E-06 | ctrl - P10; ctrl - P11; ctrl - P3; ctrl - P8; P2 - P10; P3 - P10; P2 - P11; P3 - P11; P2 - P3; P2 - P8; P3 - P8                               |
| TC0X00008526.hg.1 | TC0X00008526.hg.1 | NM_001159699                           | FHL1             | 2273     | 36.7<br>7   | 7.23<br>E-07 | 6.14<br>07 | 1.57<br>E-06 | P10 - ctrl; P3 - ctrl; P8 - ctrl; P10 - P11; P10 - P2; P8 - P10; P3 - P11; P8 - P11; P3 - P2; P8 - P2; P8 - P3                                |
| TC1000012438.hg.1 | TC1000012438.hg.1 | NR_036438                              | SVILP1           | 645954   | 36.68<br>6  | 7.25<br>E-07 | 6.13<br>94 | 1.57<br>E-06 | P10 - ctrl; P3 - ctrl; P8 - ctrl; P10 - P11; P10 - P2; P3 - P10; P8 - P10; P3 - P11; P8 - P11; P3 - P2; P8 - P2                               |
| TC0200012980.hg.1 | TC0200012980.hg.1 | NM_152792                              | ASPRV1           | 151516   | 36.65<br>8  | 7.28<br>E-07 | 6.13<br>8  | 1.58<br>E-06 | ctrl - P10; P11 - ctrl; ctrl - P3; ctrl - P8; P11 - P10; P2 - P10; P11 - P2; P11 - P3; P11 - P8; P2 - P3; P2 - P8; P3 - P8                    |
| TC1600010641.hg.1 | TC1600010641.hg.1 | ENST00000563083.1                      | CTD-2012K14.3    |          | 36.65<br>5  | 7.28<br>E-07 | 6.13<br>78 | 1.58<br>E-06 | P10 - ctrl; P11 - ctrl; P3 - ctrl; P8 - ctrl; P10 - P11; P10 - P2; P10 - P3; P10 - P8; P11 - P2; P8 - P11; P3 - P2; P8 - P2; P8 - P3          |

|                         |                         |                                |               |                  |            |              |            |              |                                                                                                                                                |
|-------------------------|-------------------------|--------------------------------|---------------|------------------|------------|--------------|------------|--------------|------------------------------------------------------------------------------------------------------------------------------------------------|
| TC1300007110.hg.1       | TC1300007110.hg.1       | OTTHUMT00000474841             | RP11-165D6.1  |                  | 36.62<br>5 | 7.31<br>E-07 | 6.13<br>58 | 1.58<br>E-06 | ctrl - P10; ctrl - P11; ctrl - P8; P11 - P10; P2 - P10; P3 - P10; P2 - P11; P3 - P11; P11 - P8; P2 - P8; P3 - P8                               |
| TC0800012464.hg.1       | TC0800012464.hg.1       | NR_024393                      | CASC8         | 727677           | 36.59<br>2 | 7.35<br>E-07 | 6.13<br>36 | 1.59<br>E-06 | P10 - ctrl; P3 - ctrl; P8 - ctrl; P10 - P11; P10 - P2; P3 - P10; P3 - P11; P8 - P11; P3 - P2; P8 - P2                                          |
| TC0200013021.hg.1       | TC0200013021.hg.1       | NM_020459                      | PAIP2B        | 400961           | 36.58<br>5 | 7.36<br>E-07 | 6.13<br>28 | 1.59<br>E-06 | ctrl - P10; ctrl - P2; ctrl - P3; ctrl - P8; P11 - P10; P2 - P10; P11 - P2; P11 - P3; P11 - P8; P2 - P3; P2 - P8                               |
| TC0100009476.hg.1       | TC0100009476.hg.1       | hunura.aAug10-<br>unspliced    | hunura        | NA               | 36.51<br>6 | 7.44<br>E-07 | 6.12<br>86 | 1.61<br>E-06 | ctrl - P10; P2 - ctrl; ctrl - P3; ctrl - P8; P11 - P10; P2 - P10; P3 - P10; P2 - P11; P11 - P3; P11 - P8; P2 - P3; P2 - P8; P3 - P8            |
| TC0100014531.hg.1       | TC0100014531.hg.1       | NM_001002292                   | WLS           | 79971            | 36.47<br>5 | 7.48<br>E-07 | 6.12<br>59 | 1.61<br>E-06 | ctrl - P10; ctrl - P2; ctrl - P3; ctrl - P8; P11 - P10; P2 - P10; P3 - P10; P8 - P10; P11 - P2; P11 - P3; P11 - P8                             |
| TC0600008509.hg.1       | TC0600008509.hg.1       | NM_001160130                   | KCNQ5         | 56479            | 36.47<br>3 | 7.48<br>E-07 | 6.12<br>58 | 1.61<br>E-06 | ctrl - P10; ctrl - P11; ctrl - P2; ctrl - P3; ctrl - P8; P11 - P10; P2 - P10; P3 - P10; P2 - P11; P3 - P11; P2 - P3; P2 - P8; P3 - P8          |
| TC1500008797.hg.1       | TC1500008797.hg.1       | yoharu.aAug10-<br>unspliced    | yoharu        | NA               | 36.42<br>5 | 7.54<br>E-07 | 6.12<br>27 | 1.62<br>E-06 | ctrl - P10; ctrl - P11; ctrl - P3; ctrl - P8; P2 - P10; P3 - P10; P10 - P8; P2 - P11; P3 - P11; P2 - P3; P2 - P8; P3 - P8                      |
| TC1900007992.hg.1       | TC1900007992.hg.1       | reture.aAug10-<br>unspliced    | reture        | NA               | 36.47<br>4 | 7.57<br>E-07 | 6.12<br>09 | 1.63<br>E-06 | ctrl - P10; ctrl - P11; ctrl - P8; P10 - P11; P2 - P10; P3 - P10; P2 - P11; P3 - P11; P8 - P11; P2 - P8; P3 - P8                               |
| TC0100017094.hg.1       | TC0100017094.hg.1       | NM_001123168                   | FAM72A        | 729533           | 36.35<br>9 | 7.62<br>E-07 | 6.11<br>82 | 1.64<br>E-06 | P10 - ctrl; P8 - ctrl; P10 - P11; P10 - P2; P10 - P3; P8 - P10; P3 - P11; P8 - P11; P3 - P2; P8 - P2; P8 - P3                                  |
| TC1200007154.hg.1       | TC1200007154.hg.1       | smgyuby.aAug10-<br>unspliced   | smgyuby       | NA               | 36.29<br>4 | 7.69<br>E-07 | 6.11<br>39 | 1.65<br>E-06 | ctrl - P10; ctrl - P11; ctrl - P3; ctrl - P8; P2 - P10; P10 - P8; P2 - P11; P11 - P8; P2 - P2 - P8; P3 - P8                                    |
| TSUnmapped00000137.hg.1 | TSUnmapped00000137.hg.1 | ENST00000626615                | ABO           | NA               | 36.27<br>1 | 7.72<br>E-07 | 6.11<br>24 | 1.66<br>E-06 | ctrl - P10; ctrl - P2; ctrl - P8; P11 - P10; P3 - P10; P11 - P2; P11 - P8; P3 - P2; P3 - P8                                                    |
| TC1500010725.hg.1       | TC1500010725.hg.1       | NM_000070                      | CAPN3         | 825              | 36.23<br>8 | 7.76<br>E-07 | 6.11<br>03 | 1.66<br>E-06 | ctrl - P10; ctrl - P11; ctrl - P2; ctrl - P3; ctrl - P8; P11 - P10; P2 - P10; P3 - P10; P11 - P3; P11 - P8; P2 - P3; P2 - P8; P3 - P8          |
| TC2100008297.hg.1       | TC2100008297.hg.1       | ENST00000270162                | SIK1          | 150094           | 36.19<br>5 | 7.81<br>E-07 | 6.10<br>74 | 1.67<br>E-06 | P10 - ctrl; P11 - ctrl; ctrl - P2; P3 - ctrl; P8 - ctrl; P10 - P11; P10 - P2; P10 - P3; P11 - P2; P8 - P11; P3 - P2; P8 - P2; P8 - P3          |
| TC0900008954.hg.1       | TC0900008954.hg.1       | soshaw.aAug10-<br>unspliced    | soshaw        | NA               | 36.14<br>3 | 7.87<br>E-07 | 6.10<br>39 | 1.69<br>E-06 | ctrl - P10; ctrl - P11; ctrl - P3; ctrl - P8; P2 - P10; P10 - P8; P2 - P11; P11 - P3; P11 - P8; P2 - P3; P2 - P8                               |
| TC1500008894.hg.1       | TC1500008894.hg.1       | uc059hck.1                     | RNU6-466P     | NA               | 36.12<br>7 | 7.89<br>E-07 | 6.10<br>28 | 1.69<br>E-06 | ctrl - P10; ctrl - P11; P2 - ctrl; ctrl - P3; ctrl - P8; P2 - P10; P3 - P10; P2 - P11; P11 - P8; P2 - P3; P2 - P8; P3 - P8                     |
| TC0500009212.hg.1       | TC0500009212.hg.1       | kiaflo.aAug10-<br>unspliced    | kiaflo        | NA               | 36.10<br>1 | 7.92<br>E-07 | 6.10<br>11 | 1.69<br>E-06 | ctrl - P10; ctrl - P3; ctrl - P8; P11 - P10; P2 - P10; P11 - P2; P11 - P3; P11 - P8; P2 - P3; P2 - P8; P3 - P8                                 |
| TC0300009164.hg.1       | TC0300009164.hg.1       | klardorbu.aAug10-<br>unspliced | klardorbu     | NA               | 36.09<br>1 | 7.94<br>E-07 | 6.10<br>04 | 1.69<br>E-06 | ctrl - P10; ctrl - P11; ctrl - P3; ctrl - P8; P11 - P10; P2 - P10; P3 - P10; P2 - P11; P11 - P8; P2 - P3; P2 - P8; P3 - P8                     |
| TC0100009144.hg.1       | TC0100009144.hg.1       | skoroybo.aAug10-<br>unspliced  | skoroybo      | NA               | 36.09<br>9 | 7.94<br>E-07 | 6.10<br>04 | 1.69<br>E-06 | ctrl - P10; ctrl - P11; P2 - ctrl; ctrl - P3; ctrl - P8; P2 - P10; P3 - P10; P10 - P8; P2 - P11; P3 - P11; P11 - P8; P2 - P3; P2 - P8; P3 - P8 |
| TC0500009320.hg.1       | TC0500009320.hg.1       | NM_001142556                   | HMMR          | 3161             | 35.98<br>9 | 8.06<br>E-07 | 6.09<br>36 | 1.72<br>E-06 | P10 - ctrl; P3 - ctrl; P8 - ctrl; P10 - P11; P10 - P2; P8 - P10; P3 - P11; P8 - P11; P3 - P2; P8 - P2; P8 - P3                                 |
| TC0100018248.hg.1       | TC0100018248.hg.1       | NM_017619                      | RNPC3         | 55599            | 35.95<br>4 | 8.10<br>E-07 | 6.09<br>13 | 1.73<br>E-06 | ctrl - P10; ctrl - P11; ctrl - P3; ctrl - P8; P11 - P10; P2 - P10; P2 - P11; P11 - P3; P11 - P8; P2 - P3; P2 - P8; P3 - P8                     |
| TC0100012764.hg.1       | TC0100012764.hg.1       | gomabo.aAug10-<br>unspliced    | gomabo        | NA               | 35.91<br>6 | 8.15<br>E-07 | 6.08<br>87 | 1.74<br>E-06 | ctrl - P10; ctrl - P11; ctrl - P3; ctrl - P8; P11 - P10; P2 - P10; P10 - P8; P2 - P11; P11 - P3; P11 - P8; P2 - P3; P2 - P8; P3 - P8           |
| TC0600011943.hg.1       | TC0600011943.hg.1       | NM_001290072                   | ENPP5         | 6p21.1-<br>p11.2 | 35.89<br>5 | 8.18<br>E-07 | 6.08<br>73 | 1.74<br>E-06 | ctrl - P10; ctrl - P2; ctrl - P3; ctrl - P8; P11 - P10; P10 - P2; P10 - P3; P10 - P8; P11 - P2; P11 - P3; P11 - P8; P8 - P2                    |
| TC0600010131.hg.1       | TC0600010131.hg.1       | derfleeby.aAug10-<br>unspliced | derfleeby     | NA               | 35.72<br>8 | 8.39<br>E-07 | 6.07<br>61 | 1.78<br>E-06 | ctrl - P10; ctrl - P11; ctrl - P3; ctrl - P8; P11 - P10; P2 - P10; P2 - P11; P11 - P8; P2 - P3; P2 - P8                                        |
| TC0200010446.hg.1       | TC0200010446.hg.1       | meygyby.aAug10-<br>unspliced   | meygyby       | NA               | 35.62<br>6 | 8.53<br>E-07 | 6.06<br>92 | 1.81<br>E-06 | ctrl - P10; ctrl - P11; ctrl - P3; ctrl - P8; P11 - P10; P2 - P10; P10 - P8; P2 - P11; P11 - P3; P11 - P8; P2 - P3; P2 - P8; P3 - P8           |
| TC1900006816.hg.1       | TC1900006816.hg.1       | NA                             | NA            | NA               | 35.57<br>5 | 8.60<br>E-07 | 6.06<br>54 | 1.82<br>E-06 | P10 - ctrl; P8 - ctrl; P10 - P11; P10 - P2; P10 - P3; P8 - P11; P3 - P2; P8 - P2; P8 - P3                                                      |
| TC0100014966.hg.1       | TC0100014966.hg.1       | NM_001308253                   | GCLM          | 2730             | 35.55<br>5 | 8.63<br>E-07 | 6.06<br>41 | 1.83<br>E-06 | P10 - ctrl; P3 - ctrl; P8 - ctrl; P10 - P11; P10 - P2; P3 - P11; P8 - P11; P3 - P2; P8 - P2                                                    |
| TC1200012547.hg.1       | TC1200012547.hg.1       | ENST00000623177                | RP11-46H11.11 |                  | 35.51<br>7 | 8.67<br>E-07 | 6.06<br>19 | 1.84<br>E-06 | ctrl - P10; ctrl - P11; ctrl - P3; ctrl - P8; P2 - P10; P3 - P10; P2 - P11; P3 - P11; P2 - P3; P2 - P8; P3 - P8                                |
| TC0600011887.hg.1       | TC0600011887.hg.1       | ENST00000607600.1              | RP1-261G23.7  |                  | 35.45<br>8 | 8.75<br>E-07 | 6.05<br>78 | 1.85<br>E-06 | P10 - ctrl; P11 - ctrl; ctrl - P2; ctrl - P3; P8 - ctrl; P10 - P2; P10 - P3; P11 - P2; P11 - P3; P3 - P2; P8 - P2; P8 - P3                     |
| TC2000007242.hg.1       | TC2000007242.hg.1       | OTTHUMT00000473783             | RP11-234K24.6 |                  | 35.45<br>1 | 8.76<br>E-07 | 6.05<br>73 | 1.85<br>E-06 | ctrl - P10; ctrl - P11; ctrl - P2; ctrl - P3; ctrl - P8; P11 - P10; P2 - P10; P11 - P3; P11 - P8; P2 - P3; P2 - P8                             |
| TC0X00009073.hg.1       | TC0X00009073.hg.1       | NA                             | NA            | NA               | 35.43<br>2 | 8.79<br>E-07 | 6.05<br>61 | 1.86<br>E-06 | ctrl - P10; ctrl - P11; ctrl - P3; ctrl - P8; P11 - P10; P2 - P10; P10 - P8; P2 - P11; P11 - P8; P2 - P3; P2 - P8; P3 - P8                     |
| TC1200011496.hg.1       | TC1200011496.hg.1       | NM_001920                      | DCN           | 1634             | 35.40<br>6 | 8.82<br>E-07 | 6.05<br>43 | 1.86<br>E-06 | P10 - ctrl; P3 - ctrl; P8 - ctrl; P10 - P11; P10 - P2; P3 - P10; P3 - P11; P8 - P11; P3 - P2; P8 - P2; P3 - P8                                 |
| TC0800012011.hg.1       | TC0800012011.hg.1       | spazyby.aAug10                 | spazyby       | NA               | 35.38<br>9 | 8.85<br>E-07 | 6.05<br>31 | 1.87<br>E-06 | ctrl - P10; ctrl - P11; P2 - ctrl; ctrl - P3; ctrl - P8; P2 - P10; P3 - P10; P2 - P11; P3 - P11; P11 - P8; P2 - P3; P2 - P8; P3 - P8           |
| TC1000011420.hg.1       | TC1000011420.hg.1       | NM_001178137                   | CPEB3         | 22849            | 35.29<br>8 | 8.97<br>E-07 | 6.04<br>7  | 1.89<br>E-06 | ctrl - P10; ctrl - P2; ctrl - P3; ctrl - P8; P11 - P10; P2 - P10; P11 - P2; P11 - P3; P11 - P8                                                 |

|                   |                   |                                |               |          |             |              |              |              |                                                                                                                                                 |
|-------------------|-------------------|--------------------------------|---------------|----------|-------------|--------------|--------------|--------------|-------------------------------------------------------------------------------------------------------------------------------------------------|
| TC0500007891.hg.1 | TC0500007891.hg.1 | torstawby.aAug10-<br>unspliced | torstawby     | NA       | 35.26<br>1  | 9.03<br>E-07 | 6.04<br>45   | 1.90<br>E-06 | ctrl - P10; ctrl - P11; ctrl - P3; ctrl - P8; P2 - P10; P10 - P8; P2 - P11; P11 - P8; P2 - P3; P2 - P8; P3 - P8                                 |
| TC1500009478.hg.1 | TC1500009478.hg.1 | NM_001277176                   | WDR72         | 256764   | 35.20<br>4  | 9.11<br>E-07 | 6.04<br>06   | 1.92<br>E-06 | ctrl - P10; ctrl - P3; ctrl - P8; P11 - P10; P2 - P10; P11 - P3; P11 - P8; P2 - P3; P2 - P8                                                     |
| TC0400008054.hg.1 | TC0400008054.hg.1 | soflor.aAug10-<br>unspliced    | soflor        | NA       | 35.19<br>3  | 9.12<br>E-07 | 6.03<br>98   | 1.92<br>E-06 | ctrl - P10; ctrl - P11; P2 - ctrl; ctrl - P3; ctrl - P8; P2 - P10; P3 - P10; P10 - P8; P2 - P11; P3 - P11; P11 - P8; P2 - P3; P2 - P8; P3 - P8  |
| TC0600008231.hg.1 | TC0600008231.hg.1 | NM_003221                      | TFAP2B        | 7021     | 35.15<br>9  | 9.17<br>E-07 | 6.03<br>75   | 1.93<br>E-06 | ctrl - P10; ctrl - P2; ctrl - P3; ctrl - P8; P11 - P10; P2 - P10; P11 - P2; P11 - P3; P11 - P8; P2 - P8                                         |
| TC0500008890.hg.1 | TC0500008890.hg.1 | NM_002588                      | PCDHGC3       | 5098     | 34.93<br>4  | 9.51<br>E-07 | 6.02<br>2    | 1.99<br>E-06 | P10 - ctrl; P11 - ctrl; ctrl - P2; P3 - ctrl; P8 - ctrl; P10 - P11; P10 - P2; P10 - P3; P11 - P2; P3 - P11; P8 - P11; P3 - P2; P8 - P2; P8 - P3 |
| TC0300010476.hg.1 | TC0300010476.hg.1 | NM_001012409                   | SGOL1         | 151648   | 34.93<br>3  | 9.51<br>E-07 | 6.02<br>18   | 1.99<br>E-06 | P10 - ctrl; ctrl - P11; ctrl - P2; ctrl - P3; P8 - ctrl; P10 - P11; P10 - P2; P10 - P3; P8 - P10; P8 - P11; P8 - P2; P8 - P3                    |
| TC0200016651.hg.1 | TC0200016651.hg.1 | NM_000104                      | CYP1B1        | 1545     | 34.90<br>4  | 9.55<br>E-07 | 6.02<br>E-06 | 2.00<br>E-06 | ctrl - P10; P11 - ctrl; ctrl - P8; P11 - P10; P2 - P10; P3 - P10; P11 - P2; P11 - P3; P11 - P8; P2 - P8; P3 - P8                                |
| TC0900007808.hg.1 | TC0900007808.hg.1 | parteyby.aAug10-<br>unspliced  | parteyby      | NA       | 34.89<br>7  | 9.56<br>E-07 | 6.01<br>95   | 2.00<br>E-06 | ctrl - P10; ctrl - P11; P2 - ctrl; ctrl - P3; ctrl - P8; P2 - P10; P2 - P11; P2 - P3; P2 - P8; P3 - P8                                          |
| TC0700007043.hg.1 | TC0700007043.hg.1 | kluky.aAug10-<br>unspliced     | kluky         | NA       | 34.87<br>6  | 9.59<br>E-07 | 6.01<br>8    | 2.01<br>E-06 | ctrl - P10; ctrl - P8; P11 - P10; P2 - P10; P3 - P10; P11 - P8; P2 - P8; P3 - P8                                                                |
| TC1300010011.hg.1 | TC1300010011.hg.1 | NM_001278674                   | LINC00452     | 643365   | 34.86<br>6  | 9.62<br>E-07 | 6.01<br>69   | 2.01<br>E-06 | P10 - ctrl; P2 - ctrl; P3 - ctrl; P8 - ctrl; P10 - P11; P10 - P3; P10 - P8; P2 - P11; P3 - P11; P8 - P11; P2 - P8                               |
| TC0100009147.hg.1 | TC0100009147.hg.1 | swawplo.aAug10-<br>unspliced   | swawplo       | NA       | 34.85<br>8  | 9.62<br>E-07 | 6.01<br>68   | 2.01<br>E-06 | ctrl - P10; ctrl - P11; P2 - ctrl; ctrl - P3; ctrl - P8; P11 - P10; P2 - P10; P2 - P11; P11 - P8; P2 - P3; P2 - P8                              |
| TC0700006605.hg.1 | TC0700006605.hg.1 | NA                             | NA            | NA       | 34.84<br>7  | 9.64<br>E-07 | 6.01<br>61   | 2.01<br>E-06 | ctrl - P10; ctrl - P11; ctrl - P3; ctrl - P8; P11 - P10; P2 - P10; P3 - P10; P10 - P8; P2 - P11; P11 - P8; P2 - P3; P2 - P8; P3 - P8            |
| TC0300012145.hg.1 | TC0300012145.hg.1 | NM_007085                      | FSTL1         | 11167    | 34.82<br>2  | 9.68<br>E-07 | 6.01<br>43   | 2.02<br>E-06 | ctrl - P10; ctrl - P11; ctrl - P2; ctrl - P3; P10 - P2; P10 - P3; P8 - P10; P11 - P2; P8 - P11; P8 - P2; P8 - P3                                |
| TC0100007969.hg.1 | TC0100007969.hg.1 | NR_029846                      | MIR30E        | 407034   | 34.80<br>8  | 9.70<br>E-07 | 6.01<br>34   | 2.02<br>E-06 | ctrl - P10; ctrl - P11; ctrl - P3; ctrl - P8; P11 - P10; P2 - P10; P10 - P8; P2 - P11; P11 - P3; P11 - P8; P2 - P3; P2 - P8; P3 - P8            |
| TC0600009146.hg.1 | TC0600009146.hg.1 | ENST00000607386.1              | RP5-1112D6.7  |          | 34.77<br>6  | 9.75<br>E-07 | 6.01<br>12   | 2.03<br>E-06 | ctrl - P10; ctrl - P11; P2 - ctrl; ctrl - P8; P11 - P10; P2 - P10; P3 - P10; P2 - P11; P3 - P11; P2 - P3; P2 - P8; P3 - P8                      |
| TC0400010211.hg.1 | TC0400010211.hg.1 | NR_107018                      | MIR7978       | 1.02E+08 | 34.70<br>4  | 9.86<br>E-07 | 6.00<br>62   | 2.05<br>E-06 | ctrl - P10; ctrl - P11; ctrl - P2; ctrl - P3; ctrl - P8; P11 - P10; P2 - P10; P11 - P2; P11 - P3; P11 - P8; P2 - P8                             |
| TC0300007274.hg.1 | TC0300007274.hg.1 | nuhira.aAug10-<br>unspliced    | nuhira        | NA       | 34.74<br>67 | 9.91<br>E-07 | 6.00<br>38   | 2.06<br>E-06 | ctrl - P10; ctrl - P11; ctrl - P2; ctrl - P3; ctrl - P8; P2 - P10; P2 - P3; P2 - P8                                                             |
| TC1700010232.hg.1 | TC1700010232.hg.1 | slarsmy.aAug10-<br>unspliced   | slarsmy       | NA       | 34.63<br>2  | 9.97<br>E-07 | 6.00<br>12   | 2.07<br>E-06 | ctrl - P10; ctrl - P11; ctrl - P3; ctrl - P8; P11 - P10; P2 - P10; P3 - P10; P8 - P10; P2 - P11; P2 - P3; P2 - P8; P3 - P8                      |
| TC0200014991.hg.1 | TC0200014991.hg.1 | NM_001033045                   | GPR155        | 151556   | 34.55<br>5  | 1.01<br>E-06 | 5.99<br>58   | 2.09<br>E-06 | ctrl - P10; ctrl - P2; ctrl - P3; ctrl - P8; P11 - P10; P2 - P10; P3 - P10; P11 - P2; P11 - P3; P11 - P8; P2 - P8; P3 - P8                      |
| TC1100012438.hg.1 | TC1100012438.hg.1 | skeylerby.aAug10-<br>unspliced | skeylerby     | NA       | 34.52<br>5  | 1.01<br>E-06 | 5.99<br>38   | 2.10<br>E-06 | ctrl - P10; ctrl - P11; ctrl - P3; ctrl - P8; P11 - P10; P2 - P10; P3 - P10; P10 - P8; P2 - P11; P11 - P8; P2 - P3; P2 - P8; P3 - P8            |
| TC0700012586.hg.1 | TC0700012586.hg.1 | sheebler.aAug10-<br>unspliced  | sheebler      | NA       | 34.52<br>5  | 1.02<br>E-06 | 5.99<br>34   | 2.10<br>E-06 | ctrl - P10; ctrl - P11; P2 - ctrl; ctrl - P8; P10 - P11; P2 - P10; P10 - P8; P2 - P11; P3 - P11; P2 - P3; P2 - P8; P3 - P8                      |
| TC0900009675.hg.1 | TC0900009675.hg.1 | NR_039685                      | MIR4474       | 1.01E+08 | 34.47<br>8  | 1.02<br>E-06 | 5.99<br>05   | 2.11<br>E-06 | ctrl - P10; ctrl - P11; P2 - ctrl; ctrl - P8; P2 - P10; P3 - P10; P10 - P8; P2 - P11; P3 - P11; P11 - P8; P2 - P3; P2 - P8; P3 - P8             |
| TC1800006594.hg.1 | TC1800006594.hg.1 | ENST00000584036.1              | RP11-678G15.1 |          | 34.46<br>5  | 1.02<br>E-06 | 5.98<br>96   | 2.12<br>E-06 | ctrl - P10; ctrl - P11; ctrl - P3; ctrl - P8; P2 - P10; P3 - P10; P2 - P11; P3 - P11; P11 - P8; P2 - P3; P2 - P8; P3 - P8                       |
| TC1500008131.hg.1 | TC1500008131.hg.1 | NA                             | NA            | NA       | 34.41<br>6  | 1.03<br>E-06 | 5.98<br>62   | 2.13<br>E-06 | ctrl - P10; ctrl - P3; ctrl - P8; P11 - P10; P2 - P10; P11 - P3; P11 - P8; P2 - P3; P2 - P8; P3 - P8                                            |
| TC1400007540.hg.1 | TC1400007540.hg.1 | swortoy.aAug10                 | swortoy       | NA       | 34.40<br>9  | 1.03<br>E-06 | 5.98<br>57   | 2.13<br>E-06 | P10 - ctrl; P11 - ctrl; P3 - ctrl; P8 - ctrl; P10 - P11; P10 - P2; P10 - P3; P10 - P8; P11 - P2; P11 - P3; P3 - P2; P8 - P2; P8 - P3            |
| TC1400008632.hg.1 | TC1400008632.hg.1 | NR_003029                      | SNORD9        | 14q11.2  | 34.38<br>5  | 1.04<br>E-06 | 5.98<br>4    | 2.14<br>E-06 | P11 - ctrl; P2 - ctrl; P3 - ctrl; P11 - P10; P2 - P10; P3 - P10; P11 - P8; P2 - P8; P3 - P8                                                     |
| TC0900007387.hg.1 | TC0900007387.hg.1 | ENST00000432011                | RP11-236F9.2  |          | 34.32<br>9  | 1.05<br>E-06 | 5.98<br>01   | 2.16<br>E-06 | P10 - ctrl; P3 - ctrl; P8 - ctrl; P10 - P11; P10 - P2; P3 - P10; P3 - P11; P8 - P11; P3 - P2; P8 - P2                                           |
| TC1800007420.hg.1 | TC1800007420.hg.1 | tawry.aAug10-<br>unspliced     | tawry         | NA       | 34.29<br>3  | 1.05<br>E-06 | 5.97<br>75   | 2.17<br>E-06 | ctrl - P10; ctrl - P11; ctrl - P3; ctrl - P8; P11 - P10; P2 - P10; P2 - P11; P11 - P3; P11 - P8; P2 - P3; P2 - P8; P3 - P8                      |
| TC0700008292.hg.1 | TC0700008292.hg.1 | NM_012449                      | STEAP1        | 26872    | 34.29<br>1  | 1.05<br>E-06 | 5.97<br>75   | 2.17<br>E-06 | P10 - ctrl; P3 - ctrl; P8 - ctrl; P10 - P11; P10 - P2; P3 - P10; P8 - P10; P3 - P11; P8 - P11; P3 - P2; P8 - P2                                 |
| TC0300013424.hg.1 | TC0300013424.hg.1 | NR_049838                      | MIR548AQ      | 1.01E+08 | 34.25<br>3  | 1.06<br>E-06 | 5.97<br>48   | 2.18<br>E-06 | ctrl - P10; ctrl - P11; P2 - ctrl; ctrl - P3; ctrl - P8; P2 - P10; P3 - P10; P2 - P11; P2 - P3; P2 - P8; P3 - P8                                |
| TC0400008240.hg.1 | TC0400008240.hg.1 | NM_001306151                   | DAPP1         | 27071    | 34.19<br>5  | 1.07<br>E-06 | 5.97<br>07   | 2.20<br>E-06 | P10 - ctrl; ctrl - P11; ctrl - P2; P8 - ctrl; P10 - P11; P10 - P2; P10 - P3; P11 - P2; P3 - P11; P8 - P11; P3 - P2; P8 - P2; P8 - P3            |
| TC1500006587.hg.1 | TC1500006587.hg.1 | ENST00000365073                | SNORD115-10   | 15q11.2  | 34.16<br>8  | 1.07<br>E-06 | 5.96<br>88   | 2.20<br>E-06 | P10 - ctrl; P11 - ctrl; P2 - ctrl; P3 - ctrl; P8 - ctrl; P10 - P11; P10 - P2; P3 - P10; P3 - P11; P8 - P11; P3 - P2; P8 - P2; P3 - P8           |
| TC0800011542.hg.1 | TC0800011542.hg.1 | klobly.aAug10-<br>unspliced    | klobly        | NA       | 34.12<br>1  | 1.08<br>E-06 | 5.96<br>55   | 2.22<br>E-06 | ctrl - P10; ctrl - P11; P2 - ctrl; ctrl - P8; P2 - P10; P3 - P10; P10 - P8; P2 - P11; P3 - P11; P11 - P8; P2 - P3; P2 - P8; P3 - P8             |

|                   |                   |                                |               |        |       |      |      |      |                                                                                                                                                |
|-------------------|-------------------|--------------------------------|---------------|--------|-------|------|------|------|------------------------------------------------------------------------------------------------------------------------------------------------|
| TC0200009757.hg.1 | TC0200009757.hg.1 | NA                             | NA            | NA     | 34.09 | 1.09 | 5.96 | 2.23 | ctrl - P10; ctrl - P11; P2 - ctrl; ctrl - P3; ctrl - P8; P11 - P10; P2 - P10; P3 - P10; P2 - P11; P11 - P8; P2 - P3; P2 - P8; P3 - P8          |
| TC1300009731.hg.1 | TC1300009731.hg.1 | hsa_circ_0002531               | FAM155A       | NA     | 34.03 | 1.10 | 5.95 | 2.25 | ctrl - P10; ctrl - P11; P2 - ctrl; ctrl - P8; P11 - P10; P2 - P10; P3 - P10; P10 - P8; P2 - P11; P3 - P11; P11 - P8; P2 - P3; P2 - P8; P3 - P8 |
| TC0800007312.hg.1 | TC0800007312.hg.1 | ENST00000622942                | RP11-205M5.3  |        | 34.00 | 1.10 | 5.95 | 2.26 | P10 - ctrl; P11 - ctrl; P8 - ctrl; P10 - P2; P10 - P3; P11 - P2; P11 - P3; P8 - P2; P8 - P3                                                    |
| TC1200009526.hg.1 | TC1200009526.hg.1 | nychy.aAug10-<br>unspliced     | nychy         | NA     | 33.99 | 1.10 | 5.95 | 2.26 | ctrl - P10; ctrl - P11; ctrl - P3; ctrl - P8; P11 - P10; P2 - P10; P3 - P10; P2 - P11; P11 - P8; P2 - P3; P2 - P8; P3 - P8                     |
| TC0900012047.hg.1 | TC0900012047.hg.1 | NA                             | NA            | NA     | 33.99 | 1.11 | 5.95 | 2.26 | P10 - ctrl; P11 - ctrl; P3 - ctrl; P8 - ctrl; P10 - P11; P10 - P2; P10 - P3; P11 - P2; P8 - P11; P3 - P2; P8 - P2; P8 - P3                     |
| TC1000010305.hg.1 | TC1000010305.hg.1 | zunoyby.aAug10-<br>unspliced   | zunoyby       | NA     | 33.91 | 1.12 | 5.95 | 2.29 | ctrl - P10; ctrl - P11; P2 - ctrl; ctrl - P8; P11 - P10; P2 - P10; P3 - P10; P2 - P11; P3 - P11; P2 - P3; P2 - P8; P3 - P8                     |
| TC1000010294.hg.1 | TC1000010294.hg.1 | TRNAL44P.aAug10-<br>unspliced  | TRNAL44P      | NA     | 33.87 | 1.13 | 5.94 | 2.30 | ctrl - P10; ctrl - P11; P2 - ctrl; ctrl - P3; ctrl - P8; P2 - P10; P3 - P10; P2 - P11; P3 - P11; P11 - P8; P2 - P3; P2 - P8; P3 - P8           |
| TC0900008865.hg.1 | TC0900008865.hg.1 | NM_001286760                   | CERCAM        | 51148  | 33.87 | 1.13 | 5.94 | 2.30 | P10 - ctrl; ctrl - P2; P3 - ctrl; P8 - ctrl; P10 - P11; P10 - P2; P3 - P11; P8 - P11; P3 - P2; P8 - P2                                         |
| TC0800007232.hg.1 | TC0800007232.hg.1 | jerbeyby.bAug10-<br>unspliced  | jerbeyby      | NA     | 33.86 | 1.13 | 5.94 | 2.30 | ctrl - P10; ctrl - P11; ctrl - P3; ctrl - P8; P11 - P10; P2 - P10; P3 - P10; P2 - P11; P11 - P8; P2 - P3; P2 - P8; P3 - P8                     |
| TC0800011719.hg.1 | TC0800011719.hg.1 | zokor.aAug10-<br>unspliced     | zokor         | NA     | 33.85 | 1.13 | 5.94 | 2.30 | ctrl - P10; ctrl - P11; P2 - ctrl; ctrl - P8; P11 - P10; P2 - P10; P3 - P10; P2 - P11; P3 - P11; P11 - P8; P2 - P3; P2 - P8; P3 - P8           |
| TC1300006601.hg.1 | TC1300006601.hg.1 | NM_001166271                   | SPATA13       | 221178 | 33.81 | 1.14 | 5.94 | 2.31 | ctrl - P10; ctrl - P3; ctrl - P8; P11 - P10; P2 - P10; P11 - P3; P11 - P8; P2 - P3; P2 - P8                                                    |
| TC0200007415.hg.1 | TC0200007415.hg.1 | feela.aAug10-<br>unspliced     | feela         | NA     | 33.76 | 1.15 | 5.94 | 2.33 | ctrl - P10; ctrl - P11; ctrl - P3; ctrl - P8; P2 - P10; P10 - P8; P2 - P11; P11 - P3; P11 - P8; P2 - P3; P2 - P8; P3 - P8                      |
| TC0400007232.hg.1 | TC0400007232.hg.1 | NM_001104629                   | C4orf19       | 55286  | 33.75 | 1.15 | 5.93 | 2.33 | P10 - ctrl; ctrl - P2; ctrl - P3; P8 - ctrl; P10 - P11; P10 - P2; P10 - P3; P11 - P2; P11 - P3; P8 - P11; P8 - P2; P8 - P3                     |
| TC0700008351.hg.1 | TC0700008351.hg.1 | NM_004126                      | GNG11         | 2791   | 33.73 | 1.15 | 5.93 | 2.34 | P10 - ctrl; P3 - ctrl; P8 - ctrl; P10 - P11; P10 - P2; P8 - P10; P3 - P11; P8 - P11; P3 - P2; P8 - P2; P8 - P3                                 |
| TC1200009739.hg.1 | TC1200009739.hg.1 | ENST00000602946.1              | RP5-940J5.9   |        | 33.73 | 1.15 | 5.93 | 2.34 | P10 - ctrl; P11 - ctrl; P3 - ctrl; P8 - ctrl; P10 - P11; P10 - P2; P10 - P3; P10 - P8; P11 - P2; P3 - P2; P8 - P2                              |
| TC1300008093.hg.1 | TC1300008093.hg.1 | lafeyby.aAug10-<br>unspliced   | lafeyby       | NA     | 33.71 | 1.16 | 5.93 | 2.34 | ctrl - P10; ctrl - P11; ctrl - P3; ctrl - P8; P11 - P10; P2 - P10; P2 - P11; P11 - P8; P2 - P3; P2 - P8                                        |
| TC1300009993.hg.1 | TC1300009993.hg.1 | NM_001159596                   | BIVM          | 54841  | 33.70 | 1.16 | 5.93 | 2.34 | ctrl - P10; ctrl - P2; ctrl - P3; ctrl - P8; P11 - P10; P2 - P10; P3 - P10; P11 - P3; P11 - P8; P2 - P3; P2 - P8; P3 - P8                      |
| TC0400011506.hg.1 | TC0400011506.hg.1 | perglu.aAug10-<br>unspliced    | perglu        | NA     | 33.66 | 1.17 | 5.93 | 2.36 | ctrl - P10; ctrl - P11; ctrl - P3; ctrl - P8; P11 - P10; P2 - P10; P2 - P11; P11 - P8; P2 - P3; P2 - P8; P3 - P8                               |
| TC2000006756.hg.1 | TC2000006756.hg.1 | NM_001033087                   | MACROD2       | 140733 | 33.58 | 1.18 | 5.92 | 2.39 | P10 - ctrl; P11 - ctrl; ctrl - P2; ctrl - P3; P8 - ctrl; P10 - P11; P10 - P2; P10 - P3; P11 - P2; P11 - P3; P8 - P2; P8 - P3                   |
| TC1100011761.hg.1 | TC1100011761.hg.1 | zorgleeby.aAug10-<br>unspliced | zorgleeby     | NA     | 33.57 | 1.18 | 5.92 | 2.39 | ctrl - P10; ctrl - P8; P11 - P10; P2 - P10; P3 - P10; P11 - P8; P2 - P8; P3 - P8                                                               |
| TC0500007454.hg.1 | TC0500007454.hg.1 | sneplyby.aAug10-<br>unspliced  | sneplyby      | NA     | 33.57 | 1.18 | 5.92 | 2.39 | ctrl - P10; ctrl - P11; P2 - ctrl; ctrl - P3; ctrl - P8; P2 - P10; P10 - P8; P2 - P11; P11 - P8; P2 - P3; P2 - P8; P3 - P8                     |
| TC0800008324.hg.1 | TC0800008324.hg.1 | NM_002380                      | MATN2         | 4147   | 33.56 | 1.19 | 5.92 | 2.39 | P10 - ctrl; P3 - ctrl; P8 - ctrl; P10 - P11; P10 - P2; P3 - P10; P8 - P10; P3 - P11; P8 - P11; P3 - P2; P8 - P2                                |
| TC0500011652.hg.1 | TC0500011652.hg.1 | lyju.aAug10-<br>unspliced      | lyju          | NA     | 33.56 | 1.19 | 5.92 | 2.39 | ctrl - P11; P2 - ctrl; ctrl - P8; P10 - P11; P2 - P10; P10 - P8; P2 - P11; P3 - P11; P2 - P3; P2 - P8; P3 - P8                                 |
| TC1700012436.hg.1 | TC1700012436.hg.1 | ENST00000577267.1              | RP11-159D12.2 |        | 33.55 | 1.19 | 5.92 | 2.39 | ctrl - P10; ctrl - P11; ctrl - P3; ctrl - P8; P11 - P10; P2 - P10; P3 - P10; P2 - P11; P11 - P8; P2 - P3; P2 - P8; P3 - P8                     |
| TC1400006438.hg.1 | TC1400006438.hg.1 | NA                             | NA            | NA     | 33.52 | 1.19 | 5.92 | 2.40 | ctrl - P11; P2 - ctrl; P3 - ctrl; ctrl - P8; P10 - P11; P2 - P10; P3 - P10; P10 - P8; P2 - P11; P3 - P11; P2 - P3; P2 - P8; P3 - P8            |
| TC0600013642.hg.1 | TC0600013642.hg.1 | peefla.aAug10-<br>unspliced    | peefla        | NA     | 33.51 | 1.20 | 5.92 | 2.40 | ctrl - P10; ctrl - P11; P2 - ctrl; ctrl - P8; P11 - P10; P2 - P10; P3 - P10; P2 - P11; P3 - P11; P11 - P8; P2 - P3; P2 - P8; P3 - P8           |
| TC0200007023.hg.1 | TC0200007023.hg.1 | swawgloy.aAug10-<br>unspliced  | swawgloy      | NA     | 33.47 | 1.20 | 5.91 | 2.41 | ctrl - P10; ctrl - P11; ctrl - P3; ctrl - P8; P11 - P10; P2 - P10; P2 - P11; P11 - P8; P2 - P3; P2 - P8; P3 - P8                               |
| TC1700008862.hg.1 | TC1700008862.hg.1 | NM_001006638                   | RAB37         | 326624 | 33.47 | 1.20 | 5.91 | 2.41 | P10 - ctrl; P3 - ctrl; P8 - ctrl; P10 - P11; P10 - P2; P10 - P3; P3 - P11; P8 - P11; P3 - P2; P8 - P2; P8 - P3                                 |
| TC0900011755.hg.1 | TC0900011755.hg.1 | NM_001145106                   | FIBCD1        | 84929  | 33.46 | 1.21 | 5.91 | 2.41 | P10 - ctrl; ctrl - P2; P3 - ctrl; P8 - ctrl; P10 - P11; P10 - P2; P3 - P10; P3 - P11; P8 - P11; P3 - P2; P8 - P2; P3 - P8                      |
| TC1700010653.hg.1 | TC1700010653.hg.1 | NM_001165252                   | KRTAP2-3      | 730755 | 33.45 | 1.21 | 5.91 | 2.42 | P10 - ctrl; P3 - ctrl; P8 - ctrl; P10 - P11; P10 - P2; P10 - P3; P8 - P10; P3 - P11; P8 - P11; P3 - P2; P8 - P2; P8 - P3                       |
| TC0800007668.hg.1 | TC0800007668.hg.1 | NA                             | NA            | NA     | 33.33 | 1.23 | 5.90 | 2.46 | ctrl - P11; ctrl - P8; P10 - P11; P3 - P10; P10 - P8; P2 - P11; P3 - P11; P8 - P11; P3 - P2; P2 - P8; P3 - P8                                  |
| TC2000007240.hg.1 | TC2000007240.hg.1 | NA                             | NA            | NA     | 33.31 | 1.24 | 5.90 | 2.47 | ctrl - P10; ctrl - P11; ctrl - P3; ctrl - P8; P11 - P10; P2 - P10; P3 - P10; P2 - P11; P11 - P3; P11 - P8; P2 - P3; P2 - P8; P3 - P8           |
| TC0300006662.hg.1 | TC0300006662.hg.1 | NA                             | NA            | NA     | 33.28 | 1.24 | 5.90 | 2.48 | P10 - ctrl; P3 - ctrl; P8 - ctrl; P10 - P11; P10 - P2; P10 - P3; P3 - P11; P8 - P11; P3 - P2; P8 - P2; P8 - P3                                 |
| TC0200012166.hg.1 | TC0200012166.hg.1 | feyfa.aAug10-<br>unspliced     | feyfa         | NA     | 33.16 | 1.27 | 5.89 | 2.53 | P2 - ctrl; P3 - ctrl; P2 - P10; P3 - P10; P2 - P11; P3 - P11; P3 - P2; P2 - P8; P3 - P8                                                        |

|                         |                         |                               |               |         |       |      |      |                                                                                                                                      |
|-------------------------|-------------------------|-------------------------------|---------------|---------|-------|------|------|--------------------------------------------------------------------------------------------------------------------------------------|
| TC1500010546.hg.1       | TC1500010546.hg.1       | OTTHUMT00000474289            | RP11-327J17.9 | 33.15   | 1.27  | 5.89 | 2.53 | ctrl - P10; ctrl - P11; ctrl - P3; ctrl - P8; P11 - P10; P2 - P10; P11 - P3; P11 - P8; P2 - P3; P2 - P8                              |
| TC1000011114.hg.1       | TC1000011114.hg.1       | NM_001014797                  | KCNMA1        | 3778    | 33.13 | 1.27 | 5.89 | ctrl - P10; P11 - ctrl; ctrl - P2; P3 - ctrl; ctrl - P8; P11 - P10; P3 - P10; P11 - P2; P3 - P11; P11 - P8; P3 - P2; P3 - P8         |
| TC0900012075.hg.1       | TC0900012075.hg.1       | kuwaya.aAug10-<br>unspliced   | kuwaya        | NA      | 33.04 | 1.29 | 5.88 | ctrl - P10; ctrl - P11; P2 - ctrl; ctrl - P3; ctrl - P8; P2 - P10; P3 - P10; P2 - P11; P11 - P8; P2 - P3; P2 - P8; P3 - P8           |
| TC0100017534.hg.1       | TC0100017534.hg.1       | NM_002221                     | ITPKB         | 3707    | 33.03 | 1.30 | 5.88 | ctrl - P10; P11 - ctrl; ctrl - P2; ctrl - P3; ctrl - P8; P11 - P10; P11 - P2; P11 - P3; P11 - P8                                     |
| TC1800008237.hg.1       | TC1800008237.hg.1       | sorplaw.aAug10-<br>unspliced  | sorplaw       | NA      | 32.99 | 1.30 | 5.88 | ctrl - P10; ctrl - P11; ctrl - P3; ctrl - P8; P11 - P10; P2 - P10; P2 - P11; P11 - P8; P2 - P3; P2 - P8                              |
| TC0800008033.hg.1       | TC0800008033.hg.1       | slarkor.aAug10-<br>unspliced  | slarkor       | NA      | 32.91 | 1.32 | 5.87 | ctrl - P10; ctrl - P11; ctrl - P3; ctrl - P8; P2 - P10; P3 - P10; P2 - P11; P2 - P3; P2 - P8; P3 - P8                                |
| TC0300012975.hg.1       | TC0300012975.hg.1       | NM_001038628                  | B3GALNT1      | 8706    | 32.86 | 1.33 | 5.87 | P10 - ctrl; P3 - ctrl; P8 - ctrl; P10 - P11; P10 - P2; P10 - P3; P8 - P10; P3 - P11; P8 - P11; P3 - P2; P8 - P2; P8 - P3             |
| TC0400008063.hg.1       | TC0400008063.hg.1       | zyswuby.aAug10-<br>unspliced  | zyswuby       | NA      | 32.84 | 1.34 | 5.87 | ctrl - P10; ctrl - P11; ctrl - P3; ctrl - P8; P2 - P10; P3 - P10; P10 - P8; P2 - P11; P3 - P11; P2 - P3; P2 - P8; P3 - P8            |
| TC0400010789.hg.1       | TC0400010789.hg.1       | pergaw.aAug10-<br>unspliced   | pergaw        | NA      | 32.82 | 1.34 | 5.87 | ctrl - P10; ctrl - P11; ctrl - P8; P2 - P10; P3 - P10; P10 - P8; P2 - P11; P3 - P11; P11 - P8; P2 - P8; P3 - P8                      |
| TC0Y00007293.hg.1       | TC0Y00007293.hg.1       | NA                            | NA            | NA      | 32.79 | 1.35 | 5.87 | ctrl - P10; ctrl - P11; ctrl - P2; ctrl - P8; P11 - P10; P3 - P10; P11 - P2; P3 - P11; P3 - P2; P3 - P8                              |
| TC1100007017.hg.1       | TC1100007017.hg.1       | NM_153347                     | TMEM86A       | 144110  | 32.78 | 1.35 | 5.86 | ctrl - P10; ctrl - P2; ctrl - P3; ctrl - P8; P11 - P10; P10 - P3; P11 - P2; P11 - P3; P11 - P8; P2 - P3; P8 - P3                     |
| TC1100007049.hg.1       | TC1100007049.hg.1       | NM_001098520                  | HTATIP2       | 10553   | 32.76 | 1.36 | 5.86 | P10 - ctrl; ctrl - P11; ctrl - P2; P8 - ctrl; P10 - P11; P10 - P2; P10 - P3; P3 - P11; P8 - P11; P3 - P2; P8 - P2; P8 - P3           |
| TC1000011951.hg.1       | TC1000011951.hg.1       | NR_002791                     | EMX2OS        | 10q26.1 | 32.74 | 1.36 | 5.86 | ctrl - P10; ctrl - P2; ctrl - P3; ctrl - P8; P11 - P10; P2 - P10; P10 - P8; P11 - P2; P11 - P3; P11 - P8; P2 - P3; P2 - P8; P3 - P8  |
| TC1700008101.hg.1       | TC1700008101.hg.1       | ENST00000582765               | RP11-995C19.2 | NA      | 32.72 | 1.36 | 5.86 | ctrl - P10; ctrl - P11; ctrl - P3; ctrl - P8; P2 - P10; P3 - P10; P2 - P11; P11 - P8; P2 - P3; P2 - P8; P3 - P8                      |
| TC0700013384.hg.1       | TC0700013384.hg.1       | ENST00000609770.1             | RP11-166O4.6  |         | 32.68 | 1.37 | 5.86 | ctrl - P10; ctrl - P11; ctrl - P3; ctrl - P8; P11 - P10; P2 - P10; P2 - P11; P11 - P3; P11 - P8; P2 - P3; P2 - P8                    |
| TC1200011961.hg.1       | TC1200011961.hg.1       | NM_001193453                  | TMEM116       | 89894   | 32.59 | 1.39 | 5.85 | ctrl - P10; ctrl - P2; ctrl - P3; ctrl - P8; P11 - P10; P10 - P3; P11 - P2; P11 - P3; P11 - P8                                       |
| TC0600014366.hg.1       | TC0600014366.hg.1       | NM_001130690                  | PDE10A        | 10846   | 32.49 | 1.42 | 5.84 | P10 - ctrl; P3 - ctrl; P8 - ctrl; P10 - P11; P10 - P2; P8 - P10; P3 - P11; P8 - P11; P3 - P2; P8 - P2; P8 - P3                       |
| TC1100011540.hg.1       | TC1100011540.hg.1       | darmoy.aAug10-<br>unspliced   | darmoy        | NA      | 32.48 | 1.42 | 5.84 | ctrl - P10; ctrl - P11; ctrl - P3; ctrl - P8; P11 - P10; P2 - P10; P3 - P10; P2 - P11; P11 - P8; P2 - P3; P2 - P8; P3 - P8           |
| TC1100010418.hg.1       | TC1100010418.hg.1       | NM_031217                     | KIF18A        | 81930   | 32.43 | 1.43 | 5.84 | P10 - ctrl; ctrl - P2; P3 - ctrl; P8 - ctrl; P10 - P11; P10 - P2; P8 - P10; P11 - P2; P3 - P11; P8 - P11; P3 - P2; P8 - P2; P8 - P3  |
| TC1300007164.hg.1       | TC1300007164.hg.1       | NM_001160308                  | SETDB2        | 83852   | 32.42 | 1.43 | 5.84 | ctrl - P10; P11 - ctrl; ctrl - P2; ctrl - P3; ctrl - P8; P11 - P10; P2 - P10; P11 - P2; P11 - P3; P11 - P8; P2 - P3; P2 - P8         |
| TC0X00010375.hg.1       | TC0X00010375.hg.1       | NM_001011657                  | ZMAT1         | 84460   | 32.42 | 1.43 | 5.84 | ctrl - P10; ctrl - P11; ctrl - P3; ctrl - P8; P11 - P10; P2 - P10; P3 - P10; P2 - P11; P11 - P8; P2 - P3; P2 - P8; P3 - P8           |
| TC0200011748.hg.1       | TC0200011748.hg.1       | uc061gsa.1                    | AC018463.1    | NA      | 32.40 | 1.44 | 5.84 | ctrl - P10; ctrl - P11; P2 - ctrl; ctrl - P8; P2 - P10; P3 - P10; P10 - P8; P2 - P11; P3 - P11; P2 - P3; P2 - P8; P3 - P8            |
| TC0400011000.hg.1       | TC0400011000.hg.1       | soso.aAug10-<br>unspliced     | soso          | NA      | 32.37 | 1.45 | 5.83 | ctrl - P10; ctrl - P11; ctrl - P3; ctrl - P8; P2 - P10; P3 - P10; P2 - P11; P11 - P8; P2 - P3; P2 - P8; P3 - P8                      |
| TC0600008347.hg.1       | TC0600008347.hg.1       | NA                            | NA            | NA      | 32.36 | 1.45 | 5.83 | ctrl - P10; ctrl - P11; ctrl - P3; ctrl - P8; P11 - P10; P2 - P10; P3 - P10; P10 - P8; P2 - P11; P11 - P8; P2 - P3; P2 - P8; P3 - P8 |
| TC0600011116.hg.1       | TC0600011116.hg.1       | NM_001098486                  | SLC17A3       | 10786   | 32.31 | 1.46 | 5.83 | ctrl - P10; ctrl - P11; P2 - ctrl; P3 - ctrl; P2 - P10; P3 - P10; P2 - P11; P3 - P11; P3 - P2; P2 - P8; P3 - P8                      |
| TSUnmapped00000012.hg.1 | TSUnmapped00000012.hg.1 | ENST00000625211               | LRP6          | 4040    | 32.30 | 1.46 | 5.83 | ctrl - P10; ctrl - P2; ctrl - P3; ctrl - P8; P11 - P10; P2 - P10; P11 - P3; P11 - P8; P2 - P3; P2 - P8                               |
| TC1300008944.hg.1       | TC1300008944.hg.1       | shafarby.aAug10-<br>unspliced | shafarby      | NA      | 32.28 | 1.47 | 5.83 | ctrl - P10; P2 - ctrl; ctrl - P8; P11 - P10; P2 - P10; P3 - P10; P10 - P8; P2 - P11; P11 - P8; P2 - P3; P2 - P8; P3 - P8             |
| TC0100017292.hg.1       | TC0100017292.hg.1       | smabo.aAug10-<br>unspliced    | smabo         | NA      | 32.25 | 1.48 | 5.83 | ctrl - P10; ctrl - P11; ctrl - P8; P2 - P10; P3 - P10; P2 - P11; P3 - P11; P2 - P3; P2 - P8; P3 - P8                                 |
| TC0400012639.hg.1       | TC0400012639.hg.1       | ENST00000384502               | Y RNA         |         | 32.22 | 1.48 | 5.82 | ctrl - P10; ctrl - P11; ctrl - P3; ctrl - P8; P11 - P10; P2 - P10; P3 - P10; P2 - P11; P11 - P8; P2 - P3; P2 - P8; P3 - P8           |
| TC0900008633.hg.1       | TC0900008633.hg.1       | uc064vli.1                    | AL161784.1    | NA      | 32.19 | 1.49 | 5.82 | P10 - ctrl; P11 - ctrl; P3 - ctrl; P8 - ctrl; P10 - P11; P10 - P2; P10 - P3; P11 - P2; P8 - P11; P3 - P2; P8 - P2; P8 - P3           |
| TC0300011413.hg.1       | TC0300011413.hg.1       | kasore.aAug10-<br>unspliced   | kasore        | NA      | 32.17 | 1.50 | 5.82 | ctrl - P10; ctrl - P11; ctrl - P3; ctrl - P8; P2 - P10; P2 - P11; P11 - P8; P2 - P3; P2 - P8; P3 - P8                                |
| TC0800009302.hg.1       | TC0800009302.hg.1       | ENST00000520139               | AC144568.4    | NA      | 32.17 | 1.50 | 5.82 | ctrl - P10; ctrl - P11; P2 - ctrl; ctrl - P8; P11 - P10; P2 - P10; P3 - P10; P2 - P11; P11 - P8; P2 - P3; P2 - P8; P3 - P8           |
| TC0100009621.hg.1       | TC0100009621.hg.1       | NM_006623                     | PHGDH         | 26227   | 32.16 | 1.50 | 5.82 | ctrl - P10; ctrl - P2; ctrl - P3; ctrl - P8; P11 - P10; P3 - P10; P11 - P2; P11 - P3; P11 - P8; P3 - P2; P3 - P8                     |

|                   |                   |                                |               |        |       |              |            |              |                                                                                                                                        |
|-------------------|-------------------|--------------------------------|---------------|--------|-------|--------------|------------|--------------|----------------------------------------------------------------------------------------------------------------------------------------|
| TC1600008212.hg.1 | TC1600008212.hg.1 | glusmer.aAug10-<br>unspliced   | glusmer       | NA     | 32.07 | 1.52<br>E-06 | 5.81<br>78 | 2.95<br>E-06 | ctrl - P10; ctrl - P11; ctrl - P3; ctrl - P8; P2 - P10; P10 - P8; P2 - P11; P11 - P8; P2 - P3; P2 - P8; P3 - P8                        |
| TC1500008038.hg.1 | TC1500008038.hg.1 | NM_014862                      | ARNT2         | 9915   | 32.07 | 1.52<br>E-06 | 5.81<br>72 | 2.96<br>E-06 | ctrl - P10; ctrl - P2; ctrl - P3; ctrl - P8; P11 - P10; P2 - P10; P3 - P10; P11 - P2; P11 - P3; P11 - P8; P2 - P3; P2 - P8; P3 - P8    |
| TC0800011414.hg.1 | TC0800011414.hg.1 | NA                             | NA            | NA     | 32.06 | 1.52<br>E-06 | 5.81<br>68 | 2.96<br>E-06 | ctrl - P10; P2 - ctrl; ctrl - P3; ctrl - P8; P11 - P10; P2 - P10; P10 - P3; P10 - P8; P2 - P11; P11 - P3; P11 - P8; P2 - P3; P2 - P8   |
| TC1800006595.hg.1 | TC1800006595.hg.1 | uc060nds.1                     | AP005118.1    | NA     | 32.01 | 1.54<br>E-06 | 5.81<br>29 | 2.98<br>E-06 | ctrl - P10; ctrl - P11; ctrl - P3; ctrl - P8; P2 - P10; P10 - P8; P2 - P11; P3 - P11; P2 - P3; P2 - P8; P3 - P8                        |
| TC0600014111.hg.1 | TC0600014111.hg.1 | NM_006772                      | SYNGAP1       | 8831   | 31.96 | 1.55<br>E-06 | 5.80<br>91 | 3.00<br>E-06 | ctrl - P10; ctrl - P11; ctrl - P2; ctrl - P3; ctrl - P8; P11 - P10; P2 - P10; P3 - P10; P11 - P3; P11 - P8; P2 - P3; P2 - P8           |
| TC0400007133.hg.1 | TC0400007133.hg.1 | NA                             | NA            | NA     | 31.93 | 1.56<br>E-06 | 5.80<br>68 | 3.02<br>E-06 | ctrl - P10; ctrl - P11; P2 - ctrl; ctrl - P8; P2 - P10; P3 - P10; P10 - P8; P2 - P11; P3 - P11; P2 - P3; P2 - P8; P3 - P8              |
| TC0800011583.hg.1 | TC0800011583.hg.1 | slobly.aAug10-<br>unspliced    | slobly        | NA     | 31.92 | 1.56<br>E-06 | 5.80<br>62 | 3.02<br>E-06 | ctrl - P10; ctrl - P11; P2 - ctrl; ctrl - P8; P2 - P10; P3 - P10; P10 - P8; P2 - P11; P3 - P11; P2 - P3; P2 - P8; P3 - P8              |
| TC0200007999.hg.1 | TC0200007999.hg.1 | ZNF638.uAug10-<br>unspliced    | ZNF638        | NA     | 31.90 | 1.57<br>E-06 | 5.80<br>51 | 3.02<br>E-06 | ctrl - P10; ctrl - P11; P2 - ctrl; ctrl - P3; ctrl - P8; P11 - P10; P2 - P10; P3 - P10; P2 - P11; P11 - P8; P2 - P3; P2 - P8; P3 - P8  |
| TC1300006992.hg.1 | TC1300006992.hg.1 | NA                             | NA            | NA     | 31.85 | 1.58<br>E-06 | 5.80<br>11 | 3.05<br>E-06 | ctrl - P10; ctrl - P11; ctrl - P2; ctrl - P3; ctrl - P8; P11 - P10; P2 - P10; P11 - P3; P11 - P8; P2 - P3; P2 - P8                     |
| TC0800010234.hg.1 | TC0800010234.hg.1 | NM_003012                      | SFRP1         | 6422   | 31.83 | 1.59<br>E-06 | 5.8        | 3.06<br>E-06 | ctrl - P10; ctrl - P11; ctrl - P2; ctrl - P3; ctrl - P8; P11 - P10; P2 - P10; P3 - P10; P3 - P11; P11 - P8; P3 - P2; P2 - P8; P3 - P8  |
| TC1500010929.hg.1 | TC1500010929.hg.1 | NM_207446                      | FAM174B       | 400451 | 31.83 | 1.59<br>E-06 | 5.79<br>95 | 3.06<br>E-06 | P10 - ctrl; P3 - ctrl; P8 - ctrl; P10 - P11; P10 - P2; P3 - P11; P8 - P11; P3 - P2; P8 - P2; P8 - P3                                   |
| TC0100016495.hg.1 | TC0100016495.hg.1 | tari.aAug10-<br>unspliced      | tari          | NA     | 31.82 | 1.59<br>E-06 | 5.79<br>92 | 3.06<br>E-06 | ctrl - P10; ctrl - P11; P2 - ctrl; ctrl - P3; ctrl - P8; P11 - P10; P2 - P10; P2 - P11; P11 - P3; P11 - P8; P2 - P3; P2 - P8           |
| TC1000008344.hg.1 | TC1000008344.hg.1 | NA                             | NA            | NA     | 31.81 | 1.59<br>E-06 | 5.79<br>8  | 3.06<br>E-06 | ctrl - P10; ctrl - P11; P2 - ctrl; ctrl - P8; P2 - P10; P3 - P10; P2 - P11; P3 - P11; P11 - P8; P2 - P3; P2 - P8; P3 - P8              |
| TC0600011235.hg.1 | TC0600011235.hg.1 | NM_003514                      | HIST1H2AM     | 8336   | 31.75 | 1.61<br>E-06 | 5.79<br>36 | 3.09<br>E-06 | P10 - ctrl; ctrl - P2; P8 - ctrl; P10 - P11; P10 - P2; P10 - P3; P11 - P2; P8 - P11; P3 - P2; P8 - P2; P8 - P3                         |
| TC0200009761.hg.1 | TC0200009761.hg.1 | loydo.aAug10-<br>unspliced     | loydo         | NA     | 31.72 | 1.62<br>E-06 | 5.79<br>17 | 3.10<br>E-06 | ctrl - P10; ctrl - P3; ctrl - P8; P11 - P10; P2 - P10; P3 - P10; P2 - P11; P11 - P3; P11 - P8; P2 - P3; P2 - P8; P3 - P8               |
| TC1600010741.hg.1 | TC1600010741.hg.1 | blawsnee.aAug10-<br>unspliced  | blawsnee      | NA     | 31.69 | 1.63<br>E-06 | 5.78<br>91 | 3.12<br>E-06 | ctrl - P10; ctrl - P11; ctrl - P3; ctrl - P8; P11 - P10; P2 - P10; P3 - P10; P2 - P11; P11 - P8; P2 - P3; P2 - P8; P3 - P8             |
| TC1500010549.hg.1 | TC1500010549.hg.1 | NA                             | NA            | NA     | 31.62 | 1.64<br>E-06 | 5.78<br>41 | 3.15<br>E-06 | ctrl - P10; ctrl - P11; ctrl - P3; ctrl - P8; P11 - P10; P2 - P10; P2 - P11; P11 - P3; P11 - P8; P2 - P3; P2 - P8                      |
| TC1900006668.hg.1 | TC1900006668.hg.1 | dorko.aAug10-<br>unspliced     | dorko         | NA     | 31.60 | 1.65<br>E-06 | 5.78<br>25 | 3.16<br>E-06 | P10 - ctrl; P11 - ctrl; P3 - ctrl; P8 - ctrl; P10 - P2; P10 - P3; P11 - P2; P11 - P3; P11 - P8; P8 - P2; P8 - P3                       |
| TC0600008166.hg.1 | TC0600008166.hg.1 | NM_001204051                   | SLC25A27      | 9481   | 31.60 | 1.65<br>E-06 | 5.78<br>23 | 3.16<br>E-06 | ctrl - P10; ctrl - P11; ctrl - P3; ctrl - P8; P11 - P10; P2 - P10; P3 - P10; P2 - P11; P11 - P3; P11 - P8; P2 - P3; P2 - P8; P3 - P8   |
| TC0100015644.hg.1 | TC0100015644.hg.1 | NA                             | NA            | NA     | 31.50 | 1.68<br>E-06 | 5.77<br>5  | 3.21<br>E-06 | ctrl - P10; ctrl - P11; ctrl - P3; ctrl - P8; P11 - P10; P2 - P10; P3 - P10; P2 - P11; P11 - P8; P2 - P3; P2 - P8; P3 - P8             |
| TC0300012065.hg.1 | TC0300012065.hg.1 | storbobu.aAug10-<br>unspliced  | storbobu      | NA     | 31.48 | 1.68<br>E-06 | 5.77<br>34 | 3.22<br>E-06 | ctrl - P10; P2 - ctrl; ctrl - P3; ctrl - P8; P11 - P10; P2 - P10; P3 - P10; P10 - P8; P2 - P11; P11 - P8; P2 - P3; P2 - P8; P3 - P8    |
| TC0600008548.hg.1 | TC0600008548.hg.1 | NA                             | NA            | NA     | 31.47 | 1.69<br>E-06 | 5.77<br>22 | 3.23<br>E-06 | P10 - ctrl; P2 - ctrl; P8 - ctrl; P10 - P11; P2 - P10; P10 - P3; P10 - P8; P2 - P11; P8 - P11; P2 - P3; P2 - P8; P8 - P3               |
| TC0200009607.hg.1 | TC0200009607.hg.1 | vudu.aAug10-<br>unspliced      | vudu          | NA     | 31.45 | 1.69<br>E-06 | 5.77<br>12 | 3.23<br>E-06 | ctrl - P10; ctrl - P11; P2 - ctrl; ctrl - P8; P11 - P10; P2 - P10; P3 - P10; P2 - P11; P3 - P11; P11 - P8; P2 - P3; P2 - P8; P3 - P8   |
| TC1600009425.hg.1 | TC1600009425.hg.1 | snoywor.aAug10-<br>unspliced   | snoywor       | NA     | 31.44 | 1.70<br>E-06 | 5.76<br>99 | 3.24<br>E-06 | ctrl - P10; ctrl - P11; ctrl - P3; ctrl - P8; P2 - P10; P2 - P11; P11 - P8; P2 - P3; P2 - P8; P3 - P8                                  |
| TC0300009676.hg.1 | TC0300009676.hg.1 | shermubu.aAug10-<br>unspliced  | shermubu      | NA     | 31.43 | 1.70<br>E-06 | 5.76<br>97 | 3.24<br>E-06 | ctrl - P10; ctrl - P11; ctrl - P3; ctrl - P8; P11 - P10; P2 - P10; P2 - P11; P11 - P3; P11 - P8; P2 - P3; P2 - P8                      |
| TC2100006634.hg.1 | TC2100006634.hg.1 | flotar.aAug10-<br>unspliced    | flotar        | NA     | 31.43 | 1.70<br>E-06 | 5.76<br>95 | 3.24<br>E-06 | ctrl - P10; ctrl - P11; ctrl - P3; ctrl - P8; P11 - P10; P2 - P10; P3 - P10; P11 - P3; P11 - P8; P2 - P3; P2 - P8                      |
| TC0X00009074.hg.1 | TC0X00009074.hg.1 | NA                             | NA            | NA     | 31.42 | 1.70<br>E-06 | 5.76<br>86 | 3.24<br>E-06 | ctrl - P10; ctrl - P11; ctrl - P3; ctrl - P8; P11 - P10; P2 - P10; P2 - P11; P11 - P3; P11 - P8; P2 - P3; P2 - P8                      |
| TC0700009530.hg.1 | TC0700009530.hg.1 | dersmarbu.aAug10-<br>unspliced | dersmarbu     | NA     | 31.41 | 1.71<br>E-06 | 5.76<br>8  | 3.24<br>E-06 | ctrl - P10; ctrl - P11; P2 - ctrl; ctrl - P3; ctrl - P8; P2 - P10; P2 - P11; P11 - P8; P2 - P3; P2 - P8; P3 - P8                       |
| TC1200012296.hg.1 | TC1200012296.hg.1 | ENST00000602988.1              | RP11-214K3.21 | NA     | 31.39 | 1.71<br>E-06 | 5.76<br>67 | 3.25<br>E-06 | ctrl - P10; ctrl - P11; ctrl - P3; ctrl - P8; P11 - P10; P2 - P10; P3 - P10; P10 - P8; P2 - P11; P11 - P8; P2 - P3; P2 - P8; P3 - P8   |
| TC0Y00007288.hg.1 | TC0Y00007288.hg.1 | wubo.aAug10-<br>unspliced      | wubo          | NA     | 31.36 | 1.72<br>E-06 | 5.76<br>45 | 3.25<br>E-06 | ctrl - P10; ctrl - P11; ctrl - P2; ctrl - P3; ctrl - P8; P11 - P10; P3 - P10; P8 - P10; P11 - P2; P3 - P11; P11 - P8; P2 - P3; P2 - P8 |
| TC0Y00007296.hg.1 | TC0Y00007296.hg.1 | sorbo.aAug10-<br>unspliced     | sorbo         | NA     | 31.36 | 1.72<br>E-06 | 5.76<br>45 | 3.25<br>E-06 | ctrl - P10; ctrl - P11; ctrl - P2; ctrl - P3; ctrl - P8; P11 - P10; P3 - P10; P8 - P10; P11 - P2; P3 - P11; P3 - P2; P3 - P8           |
| TC0Y00007297.hg.1 | TC0Y00007297.hg.1 | snubar.aAug10-<br>unspliced    | snubar        | NA     | 31.36 | 1.72<br>E-06 | 5.76<br>45 | 3.25<br>E-06 | ctrl - P10; ctrl - P11; ctrl - P2; ctrl - P3; ctrl - P8; P11 - P10; P3 - P10; P8 - P10; P11 - P2; P3 - P11; P3 - P2; P3 - P8           |
| TC0Y00007301.hg.1 | TC0Y00007301.hg.1 | shabo.aAug10-<br>unspliced     | shabo         | NA     | 31.36 | 1.72<br>E-06 | 5.76<br>45 | 3.25<br>E-06 | ctrl - P10; ctrl - P11; ctrl - P2; ctrl - P3; ctrl - P8; P11 - P10; P3 - P10; P8 - P10; P11 - P2; P3 - P11; P3 - P2; P3 - P8           |



|                   |                   |                                  |               |          |                 |              |            |              |                                                                                                                                        |
|-------------------|-------------------|----------------------------------|---------------|----------|-----------------|--------------|------------|--------------|----------------------------------------------------------------------------------------------------------------------------------------|
| TC0Y00007307.hg.1 | TC0Y00007307.hg.1 | korbo.aAug10-<br>unspliced       | korbo         | NA       | 31.<br>36<br>9  | 1.72<br>E-06 | 5.76<br>45 | 3.25<br>E-06 | ctrl - P10; ctrl - P11; ctrl - P2; ctrl - P3; ctrl - P8; P11 - P10; P3 - P10; P8 - P10; P11 - P2; P3 - P11; P3 - P2; P3 - P8           |
| TC0700012917.hg.1 | TC0700012917.hg.1 | NM_001042482                     | TPK1          | 27010    | 31.<br>36<br>4  | 1.72<br>E-06 | 5.76<br>42 | 3.25<br>E-06 | P10 - ctrl; P8 - ctrl; P10 - P11; P10 - P2; P10 - P3; P8 - P11; P8 - P2; P8 - P3                                                       |
| TC1100006999.hg.1 | TC1100006999.hg.1 | vycher.aAug10-<br>unspliced      | vycher        | NA       | 31.<br>35<br>8  | 1.72<br>E-06 | 5.76<br>37 | 3.25<br>E-06 | ctrl - P10; ctrl - P11; ctrl - P3; ctrl - P8; P2 - P10; P3 - P10; P2 - P11; P3 - P11; P2 - P3; P2 - P8; P3 - P8                        |
| TC0900010217.hg.1 | TC0900010217.hg.1 | NR_046175                        | LOC286297     | 286297   | 31.<br>35<br>2  | 1.72<br>E-06 | 5.76<br>32 | 3.25<br>E-06 | P10 - ctrl; P3 - ctrl; P8 - ctrl; P10 - P11; P10 - P2; P3 - P10; P3 - P11; P8 - P11; P3 - P2; P8 - P2                                  |
| TC1500010183.hg.1 | TC1500010183.hg.1 | OTTHUMT00000433<br>312           | RP11-81A1.6   |          | 31.<br>35<br>1  | 1.73<br>E-06 | 5.76<br>32 | 3.25<br>E-06 | ctrl - P10; ctrl - P11; ctrl - P2; ctrl - P3; ctrl - P8; P11 - P10; P2 - P10; P3 - P10; P2 - P11; P11 - P8; P2 - P3; P2 - P8; P3 - P8  |
| TC0200015307.hg.1 | TC0200015307.hg.1 | NM_018897                        | DNAH7         | 56171    | 31.<br>35<br>2  | 1.73<br>E-06 | 5.76<br>31 | 3.25<br>E-06 | ctrl - P10; ctrl - P2; ctrl - P3; ctrl - P8; P11 - P10; P2 - P10; P11 - P2; P11 - P3; P11 - P8; P2 - P3; P2 - P8                       |
| TC1200011313.hg.1 | TC1200011313.hg.1 | hsa_circ_0000422                 | NAP1L1        | NA       | 31.<br>34<br>8  | 1.73<br>E-06 | 5.76<br>3  | 3.25<br>E-06 | ctrl - P10; ctrl - P11; ctrl - P2; ctrl - P3; ctrl - P8; P11 - P10; P2 - P10; P3 - P10; P2 - P11; P3 - P11; P2 - P3; P2 - P8; P3 - P8  |
| TC1800008624.hg.1 | TC1800008624.hg.1 | ENST00000625002                  | RP11-380M21.3 |          | 31.<br>31<br>34 | 1.73<br>E-06 | 5.76<br>23 | 3.25<br>E-06 | ctrl - P10; ctrl - P11; P2 - ctrl; ctrl - P3; ctrl - P8; P2 - P10; P10 - P8; P2 - P11; P11 - P8; P2 - P3; P2 - P8; P3 - P8             |
| TC0700013295.hg.1 | TC0700013295.hg.1 | lorsleebeu.aAug10-<br>unspliced  | lorsleebeu    | NA       | 31.<br>33<br>6  | 1.73<br>E-06 | 5.76<br>21 | 3.25<br>E-06 | ctrl - P10; ctrl - P11; P2 - ctrl; ctrl - P3; ctrl - P8; P2 - P10; P2 - P11; P11 - P8; P2 - P3; P2 - P8; P3 - P8                       |
| TC0100011630.hg.1 | TC0100011630.hg.1 | spawabo.aAug10-<br>unspliced     | spawabo       | NA       | 31.<br>33<br>5  | 1.73<br>E-06 | 5.76<br>2  | 3.25<br>E-06 | ctrl - P10; ctrl - P11; P2 - ctrl; ctrl - P3; ctrl - P8; P11 - P10; P2 - P10; P3 - P10; P2 - P11; P11 - P8; P2 - P3; P2 - P8; P3 - P8  |
| TC2000008763.hg.1 | TC2000008763.hg.1 | NA                               | NA            | NA       | 31.<br>32       | 1.73<br>E-06 | 5.76<br>08 | 3.26<br>E-06 | ctrl - P10; ctrl - P11; P2 - ctrl; ctrl - P3; ctrl - P8; P2 - P10; P2 - P11; P2 - P3; P2 - P8                                          |
| TC2000006736.hg.1 | TC2000006736.hg.1 | NM_018327                        | SPTLC3        | 55304    | 31.<br>25<br>3  | 1.76<br>E-06 | 5.75<br>57 | 3.30<br>E-06 | ctrl - P10; ctrl - P11; ctrl - P2; ctrl - P3; ctrl - P8; P11 - P10; P2 - P10; P10 - P3; P10 - P8; P11 - P3; P11 - P8; P2 - P3; P2 - P8 |
| TC0600013416.hg.1 | TC0600013416.hg.1 | swawspreebu.aAug10-<br>unspliced | swawspreebu   | NA       | 31.<br>23<br>7  | 1.76<br>E-06 | 5.75<br>45 | 3.30<br>E-06 | ctrl - P10; ctrl - P11; P2 - ctrl; ctrl - P3; ctrl - P8; P2 - P10; P3 - P10; P2 - P11; P11 - P8; P2 - P3; P2 - P8; P3 - P8             |
| TC1400007780.hg.1 | TC1400007780.hg.1 | snarbeybu.aAug10-<br>unspliced   | snarbeybu     | NA       | 31.<br>19<br>1  | 1.77<br>E-06 | 5.75<br>1  | 3.33<br>E-06 | ctrl - P10; ctrl - P11; ctrl - P3; ctrl - P8; P2 - P10; P10 - P8; P2 - P11; P11 - P8; P2 - P3; P2 - P8; P3 - P8                        |
| TC0300009524.hg.1 | TC0300009524.hg.1 | NM_001258315                     | ECT2          | 1894     | 31.<br>17<br>1  | 1.78<br>E-06 | 5.74<br>95 | 3.34<br>E-06 | P10 - ctrl; ctrl - P11; ctrl - P2; P8 - ctrl; P10 - P11; P10 - P2; P10 - P3; P3 - P11; P8 - P11; P3 - P2; P8 - P2; P8 - P3             |
| TC1700008252.hg.1 | TC1700008252.hg.1 | NA                               | NA            | NA       | 31.<br>16<br>1  | 1.78<br>E-06 | 5.74<br>87 | 3.34<br>E-06 | P10 - ctrl; P3 - ctrl; P8 - ctrl; P10 - P11; P10 - P2; P10 - P3; P3 - P11; P8 - P11; P3 - P2; P8 - P2; P8 - P3                         |
| TC0100015563.hg.1 | TC0100015563.hg.1 | plawmeybo.aAug10-<br>unspliced   | plawmeybo     | NA       | 31.<br>13<br>7  | 1.79<br>E-06 | 5.74<br>69 | 3.35<br>E-06 | ctrl - P10; ctrl - P11; P2 - ctrl; ctrl - P3; ctrl - P8; P11 - P10; P2 - P10; P3 - P10; P2 - P11; P11 - P8; P2 - P3; P2 - P8; P3 - P8  |
| TC0900007847.hg.1 | TC0900007847.hg.1 | fleyteybu.aAug10-<br>unspliced   | fleyteybu     | NA       | 31.<br>12<br>5  | 1.79<br>E-06 | 5.74<br>6  | 3.35<br>E-06 | ctrl - P10; ctrl - P11; ctrl - P3; ctrl - P8; P2 - P10; P2 - P11; P2 - P3; P2 - P8; P3 - P8                                            |
| TC0700012270.hg.1 | TC0700012270.hg.1 | wusmoybu.aAug10-<br>unspliced    | wusmoybu      | NA       | 31.<br>07<br>5  | 1.81<br>E-06 | 5.74<br>21 | 3.38<br>E-06 | ctrl - P10; ctrl - P11; P2 - ctrl; ctrl - P8; P11 - P10; P2 - P10; P3 - P10; P2 - P11; P11 - P8; P2 - P3; P2 - P8; P3 - P8             |
| TC0900008052.hg.1 | TC0900008052.hg.1 | slawtoby.aAug10-<br>unspliced    | slawtoby      | NA       | 31.<br>06<br>06 | 1.82<br>E-06 | 5.74<br>1  | 3.39<br>E-06 | ctrl - P10; ctrl - P11; ctrl - P3; ctrl - P8; P2 - P10; P10 - P8; P2 - P11; P3 - P11; P2 - P3; P2 - P8; P3 - P8                        |
| TC1800008898.hg.1 | TC1800008898.hg.1 | NA                               | NA            | NA       | 31.<br>03<br>7  | 1.82<br>E-06 | 5.73<br>92 | 3.40<br>E-06 | ctrl - P10; ctrl - P11; ctrl - P3; ctrl - P8; P2 - P10; P10 - P3; P10 - P8; P2 - P11; P11 - P8; P2 - P3; P2 - P8                       |
| TC1600008128.hg.1 | TC1600008128.hg.1 | NM_144601                        | CMTM3         | 123920   | 31.<br>02<br>4  | 1.83<br>E-06 | 5.73<br>82 | 3.41<br>E-06 | P10 - ctrl; P3 - ctrl; P8 - ctrl; P10 - P11; P10 - P2; P3 - P10; P8 - P10; P3 - P11; P8 - P11; P3 - P2; P8 - P2                        |
| TC1900008925.hg.1 | TC1900008925.hg.1 | hsa_circ_0000961                 | U2AF2         | NA       | 30.<br>77<br>8  | 1.91<br>E-06 | 5.71<br>93 | 3.55<br>E-06 | ctrl - P10; ctrl - P11; ctrl - P3; ctrl - P8; P11 - P10; P2 - P10; P3 - P10; P2 - P11; P11 - P8; P2 - P3; P2 - P8; P3 - P8             |
| TC0600014194.hg.1 | TC0600014194.hg.1 | NM_001010927                     | TIAM2         | 26230    | 30.<br>67<br>8  | 1.94<br>E-06 | 5.71<br>16 | 3.62<br>E-06 | P10 - ctrl; P8 - ctrl; P10 - P11; P10 - P2; P10 - P3; P8 - P11; P8 - P2; P8 - P3                                                       |
| TC0500013328.hg.1 | TC0500013328.hg.1 | NM_015566                        | FAM169A       | 26049    | 30.<br>64<br>9  | 1.95<br>E-06 | 5.70<br>9  | 3.63<br>E-06 | ctrl - P10; ctrl - P11; ctrl - P2; ctrl - P3; ctrl - P8; P11 - P10; P2 - P10; P3 - P10; P11 - P2; P11 - P8; P3 - P2; P2 - P8; P3 - P8  |
| TC0700010157.hg.1 | TC0700010157.hg.1 | sunaya.aAug10-<br>unspliced      | sunaya        | NA       | 30.<br>56<br>6  | 1.98<br>E-06 | 5.70<br>29 | 3.68<br>E-06 | ctrl - P10; ctrl - P11; ctrl - P3; ctrl - P8; P2 - P10; P10 - P8; P2 - P11; P2 - P3; P2 - P8; P3 - P8                                  |
| TC1800008896.hg.1 | TC1800008896.hg.1 | gleesar.aAug10-<br>unspliced     | gleesar       | NA       | 30.<br>56<br>6  | 1.98<br>E-06 | 5.70<br>29 | 3.68<br>E-06 | ctrl - P10; ctrl - P11; ctrl - P3; ctrl - P8; P2 - P10; P2 - P11; P2 - P3; P2 - P8                                                     |
| TC1600007201.hg.1 | TC1600007201.hg.1 | NA                               | NA            | NA       | 30.<br>30<br>5  | 2.01<br>E-06 | 5.69<br>77 | 3.72<br>E-06 | ctrl - P10; ctrl - P11; ctrl - P3; ctrl - P8; P2 - P10; P2 - P11; P11 - P8; P2 - P3; P2 - P8                                           |
| TC1600008218.hg.1 | TC1600008218.hg.1 | NM_001199280                     | HAS3          | 3038     | 30.<br>39<br>1  | 2.05<br>E-06 | 5.68<br>92 | 3.79<br>E-06 | P10 - ctrl; P3 - ctrl; P8 - ctrl; P10 - P11; P10 - P2; P8 - P10; P11 - P2; P3 - P11; P8 - P11; P3 - P2; P8 - P2                        |
| TC1900009890.hg.1 | TC1900009890.hg.1 | ENST00000587970                  | LOC105372290  | 1.05E+08 | 30.<br>34<br>5  | 2.06<br>E-06 | 5.68<br>56 | 3.82<br>E-06 | P10 - ctrl; P3 - ctrl; P8 - ctrl; P10 - P11; P10 - P2; P10 - P3; P3 - P11; P8 - P11; P3 - P2; P8 - P2; P8 - P3                         |
| TC1000006683.hg.1 | TC1000006683.hg.1 | NR_038291                        | LINC00707     | 1.01E+08 | 30.<br>33<br>9  | 2.06<br>E-06 | 5.68<br>52 | 3.82<br>E-06 | ctrl - P2; P3 - ctrl; P8 - ctrl; P10 - P2; P3 - P10; P8 - P10; P11 - P2; P3 - P11; P8 - P11; P3 - P2; P8 - P2; P3 - P8                 |
| TC0400006844.hg.1 | TC0400006844.hg.1 | storsweybu.aAug10-<br>unspliced  | storsweybu    | NA       | 30.<br>32<br>8  | 2.07<br>E-06 | 5.68<br>43 | 3.83<br>E-06 | ctrl - P10; ctrl - P11; ctrl - P8; P11 - P10; P2 - P10; P3 - P10; P2 - P11; P3 - P11; P11 - P8; P2 - P3; P2 - P8; P3 - P8              |
| TC1100007307.hg.1 | TC1100007307.hg.1 | NM_001276722                     | C11orf74      | 119710   | 30.<br>26<br>1  | 2.09<br>E-06 | 5.67<br>91 | 3.87<br>E-06 | ctrl - P10; ctrl - P11; ctrl - P2; ctrl - P3; ctrl - P8; P11 - P10; P11 - P2; P11 - P3; P11 - P8; P2 - P3; P2 - P8                     |
| TC0200015193.hg.1 | TC0200015193.hg.1 | NM_001271751                     | CALCRL        | 10203    | 30.<br>21<br>6  | 2.11<br>E-06 | 5.67<br>55 | 3.90<br>E-06 | ctrl - P10; ctrl - P2; ctrl - P3; ctrl - P8; P11 - P10; P11 - P2; P11 - P3; P11 - P8                                                   |

|                                  |                                  |                               |              |         |             |              |            |              |                                                                                                                                       |
|----------------------------------|----------------------------------|-------------------------------|--------------|---------|-------------|--------------|------------|--------------|---------------------------------------------------------------------------------------------------------------------------------------|
| TC1700012204.hg.1                | TC1700012204.hg.1                | ENST00000507171               | AC107982.4   | NA      | 30.20<br>4  | 2.12<br>E-06 | 5.67<br>46 | 3.90<br>E-06 | ctrl - P10; ctrl - P11; ctrl - P3; ctrl - P8; P11 - P10; P2 - P10; P3 - P10; P10 - P8; P11 - P8; P2 - P3; P2 - P8; P3 - P8            |
| TC1500008627.hg.1                | TC1500008627.hg.1                | NR_027992                     | NBEAP1       | 606     | 30.18<br>18 | 2.12<br>E-06 | 5.67<br>27 | 3.92<br>E-06 | ctrl - P10; ctrl - P3; ctrl - P8; P11 - P10; P2 - P10; P3 - P10; P11 - P8; P2 - P3; P2 - P8; P3 - P8                                  |
| TC0200009933.hg.1                | TC0200009933.hg.1                | NM_001289947                  | ERICH2       | 285141  | 30.14<br>9  | 2.14<br>E-06 | 5.67<br>03 | 3.94<br>E-06 | ctrl - P10; P11 - ctrl; ctrl - P2; ctrl - P3; ctrl - P8; P11 - P10; P2 - P10; P3 - P10; P11 - P2; P11 - P3; P11 - P8; P3 - P8         |
| TC1100006798.hg.1                | TC1100006798.hg.1                | NR_073431                     | TMEM98-AS1   | 493900  | 30.09<br>2  | 2.16<br>E-06 | 5.66<br>58 | 3.98<br>E-06 | ctrl - P10; ctrl - P2; ctrl - P3; ctrl - P8; P11 - P10; P2 - P10; P3 - P10; P11 - P2; P11 - P3; P11 - P8; P2 - P8; P3 - P8            |
| TC0900008986.hg.1                | TC0900008986.hg.1                | swolu.aAug10-<br>unspliced    | swolu        | NA      | 30.06<br>4  | 2.17<br>E-06 | 5.66<br>35 | 3.99<br>E-06 | ctrl - P10; ctrl - P11; P2 - ctrl; ctrl - P3; ctrl - P8; P2 - P10; P3 - P10; P2 - P11; P11 - P8; P2 - P3; P2 - P8; P3 - P8            |
| TCUn_GL000218v1<br>00006435.hg.1 | TCUn_GL000218v1<br>00006435.hg.1 | hsa_circ_0089767              | LOC100233156 | NA      | 30.02<br>3  | 2.19<br>E-06 | 5.66<br>03 | 4.02<br>E-06 | ctrl - P10; ctrl - P11; P2 - ctrl; ctrl - P3; ctrl - P8; P11 - P10; P2 - P10; P3 - P10; P2 - P11; P11 - P8; P2 - P3; P2 - P8; P3 - P8 |
| TC1400008822.hg.1                | TC1400008822.hg.1                | NA                            | NA           | NA      | 30.00<br>9  | 2.19<br>E-06 | 5.65<br>92 | 4.03<br>E-06 | ctrl - P10; ctrl - P11; ctrl - P3; ctrl - P8; P2 - P10; P3 - P10; P10 - P8; P2 - P11; P11 - P8; P2 - P3; P2 - P8; P3 - P8             |
| TC0100010649.hg.1                | TC0100010649.hg.1                | smawlybu.aAug10-<br>unspliced | smawlybu     | NA      | 29.99<br>2  | 2.20<br>E-06 | 5.65<br>79 | 4.04<br>E-06 | ctrl - P10; ctrl - P11; ctrl - P3; ctrl - P8; P2 - P10; P3 - P10; P2 - P11; P11 - P8; P2 - P3; P2 - P8; P3 - P8                       |
| TC0200013568.hg.1                | TC0200013568.hg.1                | hinomo.aAug10-<br>unspliced   | hinomo       | NA      | 29.93<br>3  | 2.22<br>E-06 | 5.65<br>32 | 4.08<br>E-06 | ctrl - P10; ctrl - P11; P2 - ctrl; ctrl - P8; P11 - P10; P2 - P10; P3 - P10; P2 - P11; P11 - P8; P2 - P3; P2 - P8; P3 - P8            |
| TC0700010897.hg.1                | TC0700010897.hg.1                | yahore.aAug10-<br>unspliced   | yahore       | NA      | 29.84<br>1  | 2.26<br>E-06 | 5.64<br>59 | 4.14<br>E-06 | ctrl - P10; ctrl - P11; ctrl - P3; ctrl - P8; P11 - P10; P2 - P10; P3 - P10; P2 - P11; P11 - P8; P2 - P3; P2 - P8; P3 - P8            |
| TC0500007985.hg.1                | TC0500007985.hg.1                | blogey.aAug10                 | blogey       |         | 82<br>7     | 2.27<br>E-06 | 5.64<br>48 | 4.15<br>E-06 | ctrl - P10; ctrl - P11; P2 - ctrl; ctrl - P3; ctrl - P8; P11 - P10; P2 - P10; P3 - P10; P2 - P11; P11 - P8; P2 - P3; P2 - P8; P3 - P8 |
| TC0600011125.hg.1                | TC0600011125.hg.1                | NM_003513                     | HIST1H2AB    | 8335    | 29.81<br>1  | 2.27<br>E-06 | 5.64<br>35 | 4.16<br>E-06 | P10 - ctrl; ctrl - P11; P8 - ctrl; P10 - P11; P10 - P2; P10 - P3; P2 - P11; P3 - P11; P8 - P11; P8 - P2; P8 - P3                      |
| TC1700006649.hg.1                | TC1700006649.hg.1                | skyvarbu.aAug10-<br>unspliced | skyvarbu     | NA      | 29.77<br>7  | 2.29<br>E-06 | 5.64<br>08 | 4.18<br>E-06 | ctrl - P10; ctrl - P11; ctrl - P3; ctrl - P8; P2 - P10; P2 - P11; P2 - P3; P2 - P8; P3 - P8                                           |
| TC0300012196.hg.1                | TC0300012196.hg.1                | klybeebu.aAug10-<br>unspliced | klybeebu     | NA      | 29.76<br>5  | 2.29<br>E-06 | 5.63<br>99 | 4.19<br>E-06 | ctrl - P10; ctrl - P3; ctrl - P8; P11 - P10; P2 - P10; P10 - P8; P11 - P3; P11 - P8; P2 - P3; P2 - P8; P3 - P8                        |
| TC0400008327.hg.1                | TC0400008327.hg.1                | koyswoby.aAug10-<br>unspliced | koyswoby     | NA      | 29.29<br>74 | 2.30<br>E-06 | 5.63<br>78 | 4.21<br>E-06 | ctrl - P10; ctrl - P11; ctrl - P3; ctrl - P8; P11 - P10; P2 - P10; P2 - P11; P11 - P8; P2 - P3; P2 - P8                               |
| TC0200014599.hg.1                | TC0200014599.hg.1                | fuder.aAug10-<br>unspliced    | fuder        | NA      | 29.73<br>3  | 2.30<br>E-06 | 5.63<br>73 | 4.21<br>E-06 | ctrl - P10; ctrl - P11; ctrl - P3; ctrl - P8; P2 - P10; P10 - P8; P2 - P11; P3 - P11; P11 - P8; P2 - P3; P2 - P8; P3 - P8             |
| TC0700012910.hg.1                | TC0700012910.hg.1                | reeblaw.aAug10-<br>unspliced  | reeblaw      | NA      | 29.29<br>66 | 2.34<br>E-06 | 5.63<br>15 | 4.26<br>E-06 | ctrl - P10; ctrl - P11; P2 - ctrl; ctrl - P3; ctrl - P8; P2 - P10; P10 - P8; P2 - P11; P11 - P8; P2 - P3; P2 - P8; P3 - P8            |
| TC0600009969.hg.1                | TC0600009969.hg.1                | swyjee.aAug10-<br>unspliced   | swyjee       | NA      | 29.55<br>1  | 2.38<br>E-06 | 5.62<br>28 | 4.34<br>E-06 | ctrl - P10; ctrl - P11; P2 - ctrl; ctrl - P3; ctrl - P8; P2 - P10; P3 - P10; P2 - P11; P11 - P8; P2 - P3; P2 - P8; P3 - P8            |
| TC0100008796.hg.1                | TC0100008796.hg.1                | NA                            | NA           | NA      | 29.53<br>1  | 2.39<br>E-06 | 5.62<br>11 | 4.36<br>E-06 | ctrl - P10; ctrl - P11; P2 - ctrl; ctrl - P8; P11 - P10; P2 - P10; P3 - P10; P2 - P11; P11 - P8; P2 - P3; P2 - P8; P3 - P8            |
| TC0400011223.hg.1                | TC0400011223.hg.1                | chorgu.aAug10-<br>unspliced   | chorgu       | NA      | 29.51<br>1  | 2.40<br>E-06 | 5.61<br>96 | 4.37<br>E-06 | ctrl - P10; ctrl - P11; P2 - ctrl; ctrl - P3; ctrl - P8; P2 - P10; P10 - P8; P2 - P11; P11 - P8; P2 - P3; P2 - P8; P3 - P8            |
| HTA2-pos-47421981_st             | 23150844                         | NA                            | NA           | NA      | 29.50<br>1  | 2.41<br>E-06 | 5.61<br>88 | 4.38<br>E-06 | ctrl - P10; ctrl - P11; ctrl - P3; ctrl - P8; P11 - P10; P2 - P10; P3 - P10; P2 - P11; P11 - P8; P2 - P3; P2 - P8; P3 - P8            |
| TC0100013227.hg.1                | TC0100013227.hg.1                | farworbo.aAug10-<br>unspliced | farworbo     | NA      | 29.46<br>4  | 2.42<br>E-06 | 5.61<br>58 | 4.40<br>E-06 | ctrl - P10; ctrl - P11; ctrl - P3; ctrl - P8; P2 - P10; P3 - P10; P2 - P11; P3 - P11; P2 - P3; P2 - P8; P3 - P8                       |
| TC1100010743.hg.1                | TC1100010743.hg.1                | peechee.aAug10-<br>unspliced  | peechee      | NA      | 29.44<br>7  | 2.43<br>E-06 | 5.61<br>44 | 4.41<br>E-06 | ctrl - P10; ctrl - P11; ctrl - P3; ctrl - P8; P2 - P10; P2 - P11; P2 - P3; P2 - P8                                                    |
| TC1600006659.hg.1                | TC1600006659.hg.1                | nazobu.aAug10-<br>unspliced   | nazobu       | NA      | 29.41<br>5  | 2.44<br>E-06 | 5.61<br>18 | 4.44<br>E-06 | P10 - ctrl; P3 - ctrl; P8 - ctrl; P10 - P11; P10 - P2; P8 - P10; P3 - P11; P8 - P11; P3 - P2; P8 - P2; P8 - P3                        |
| TC0400012992.hg.1                | TC0400012992.hg.1                | NM_001009554                  | MFAP3L       | 9848    | 29.39<br>1  | 2.46<br>E-06 | 5.60<br>99 | 4.45<br>E-06 | ctrl - P10; ctrl - P2; ctrl - P3; ctrl - P8; P11 - P10; P3 - P10; P11 - P2; P11 - P3; P11 - P8; P3 - P2; P3 - P8                      |
| TC0300009217.hg.1                | TC0300009217.hg.1                | ENST00000364347               | Y_RNA        |         | 29.34<br>5  | 2.48<br>E-06 | 5.60<br>62 | 4.49<br>E-06 | ctrl - P10; ctrl - P11; ctrl - P3; ctrl - P8; P11 - P10; P2 - P10; P3 - P10; P2 - P11; P11 - P8; P2 - P3; P2 - P8; P3 - P8            |
| TC1500006606.hg.1                | TC1500006606.hg.1                | NR_003353                     | SNORD115-38  | 15q11.2 | 29.33<br>7  | 2.48<br>E-06 | 5.60<br>56 | 4.49<br>E-06 | P10 - ctrl; P3 - ctrl; P8 - ctrl; P10 - P11; P10 - P2; P3 - P10; P3 - P11; P8 - P11; P3 - P2; P8 - P2; P8 - P3                        |
| TC0200011702.hg.1                | TC0200011702.hg.1                | ENST00000607181.1             | RP11-254F7.3 |         | 29.33<br>2  | 2.48<br>E-06 | 5.60<br>51 | 4.49<br>E-06 | ctrl - P10; ctrl - P11; ctrl - P3; ctrl - P8; P11 - P10; P2 - P10; P11 - P3; P11 - P8; P2 - P3; P2 - P8                               |
| TC1700008911.hg.1                | TC1700008911.hg.1                | NA                            | NA           | NA      | 29.30<br>3  | 2.50<br>E-06 | 5.60<br>28 | 4.51<br>E-06 | ctrl - P10; ctrl - P11; ctrl - P2; ctrl - P3; ctrl - P8; P11 - P10; P2 - P10; P11 - P3; P11 - P8; P2 - P3; P2 - P8; P3 - P8           |
| TC1500008523.hg.1                | TC1500008523.hg.1                | darzee.aAug10-<br>unspliced   | darzee       | NA      | 29.30<br>1  | 2.50<br>E-06 | 5.60<br>26 | 4.51<br>E-06 | ctrl - P10; ctrl - P11; ctrl - P3; ctrl - P8; P2 - P10; P3 - P10; P2 - P11; P2 - P3; P2 - P8; P3 - P8                                 |
| TC0X00007078.hg.1                | TC0X00007078.hg.1                | flujor.aAug10-<br>unspliced   | flujor       | NA      | 29.29<br>4  | 2.50<br>E-06 | 5.60<br>21 | 4.51<br>E-06 | ctrl - P10; ctrl - P11; ctrl - P3; ctrl - P8; P11 - P10; P2 - P10; P3 - P10; P2 - P11; P11 - P8; P2 - P3; P2 - P8; P3 - P8            |
| TC0700009089.hg.1                | TC0700009089.hg.1                | NM_001134336                  | STRIP2       | 57464   | 29.22<br>4  | 2.53<br>E-06 | 5.59<br>64 | 4.57<br>E-06 | P10 - ctrl; P3 - ctrl; P8 - ctrl; P10 - P11; P10 - P2; P3 - P11; P8 - P11; P3 - P2; P8 - P2                                           |
| TC0600008504.hg.1                | TC0600008504.hg.1                | NA                            | NA           | NA      | 29.21<br>5  | 2.54<br>E-06 | 5.59<br>57 | 4.57<br>E-06 | ctrl - P10; ctrl - P11; ctrl - P8; P10 - P11; P2 - P10; P3 - P10; P2 - P11; P3 - P11; P8 - P11; P2 - P8; P3 - P8                      |

|                      |                   |                                |               |          |             |              |            |              |                                                                                                                                       |
|----------------------|-------------------|--------------------------------|---------------|----------|-------------|--------------|------------|--------------|---------------------------------------------------------------------------------------------------------------------------------------|
| TC0500010461.hg.1    | TC0500010461.hg.1 | NA                             | NA            | NA       | 29.17<br>5  | 2.56<br>E-06 | 5.59<br>25 | 4.60<br>E-06 | ctrl - P10; ctrl - P11; P2 - ctrl; ctrl - P3; ctrl - P8; P2 - P10; P10 - P8; P2 - P11; P11 - P8; P2 - P3; P2 - P8; P3 - P8            |
| TC1600006942.hg.1    | TC1600006942.hg.1 | boysmor.aAug10-<br>unspliced   | boysmor       | NA       | 29.17<br>3  | 2.56<br>E-06 | 5.59<br>23 | 4.60<br>E-06 | ctrl - P10; ctrl - P11; ctrl - P3; ctrl - P8; P11 - P10; P2 - P10; P2 - P11; P11 - P3; P11 - P8; P2 - P3; P2 - P8                     |
| TC1400007235.hg.1    | TC1400007235.hg.1 | kluslor.aAug10-<br>unspliced   | kluslor       | NA       | 29.16<br>2  | 2.56<br>E-06 | 5.59<br>14 | 4.61<br>E-06 | ctrl - P10; ctrl - P11; P2 - ctrl; ctrl - P3; ctrl - P8; P2 - P10; P10 - P8; P2 - P11; P11 - P8; P2 - P3; P2 - P8; P3 - P8            |
| TC0400010002.hg.1    | TC0400010002.hg.1 | NA                             | NA            | NA       | 29.15<br>4  | 2.57<br>E-06 | 5.59<br>07 | 4.61<br>E-06 | ctrl - P10; ctrl - P11; ctrl - P2; ctrl - P3; ctrl - P8; P11 - P10; P2 - P10; P3 - P10; P11 - P3; P11 - P8; P2 - P3; P2 - P8; P3 - P8 |
| TC0100009143.hg.1    | TC0100009143.hg.1 | swuplo.aAug10-<br>unspliced    | swuplo        | NA       | 29.14<br>14 | 2.57<br>E-06 | 5.58<br>96 | 4.62<br>E-06 | ctrl - P10; ctrl - P11; P2 - ctrl; ctrl - P3; ctrl - P8; P2 - P10; P3 - P10; P2 - P11; P2 - P3; P2 - P8; P3 - P8                      |
| TC0200009619.hg.1    | TC0200009619.hg.1 | NM_177964                      | LYPD6B        | 2q23.2   | 29.12<br>8  | 2.58<br>E-06 | 5.58<br>86 | 4.63<br>E-06 | ctrl - P10; ctrl - P2; ctrl - P3; ctrl - P8; P11 - P10; P11 - P2; P11 - P3; P11 - P8; P2 - P3                                         |
| TC2000009137.hg.1    | TC2000009137.hg.1 | votor.aAug10-<br>unspliced     | votor         | NA       | 29.10<br>4  | 2.59<br>E-06 | 5.58<br>67 | 4.65<br>E-06 | ctrl - P10; ctrl - P11; ctrl - P3; ctrl - P8; P11 - P10; P2 - P10; P3 - P10; P2 - P11; P11 - P8; P2 - P3; P2 - P8; P3 - P8            |
| TC1000008093.hg.1    | TC1000008093.hg.1 | snamu.aAug10-<br>unspliced     | snamu         | NA       | 29.09<br>1  | 2.60<br>E-06 | 5.58<br>56 | 4.65<br>E-06 | ctrl - P10; ctrl - P11; ctrl - P3; ctrl - P8; P2 - P10; P3 - P10; P2 - P11; P3 - P11; P2 - P3; P2 - P8; P3 - P8                       |
| TC0200010417.hg.1    | TC0200010417.hg.1 | smormybo.aAug10-<br>unspliced  | smormybo      | NA       | 29.09<br>9  | 2.60<br>E-06 | 5.58<br>55 | 4.65<br>E-06 | ctrl - P10; ctrl - P11; ctrl - P3; ctrl - P8; P11 - P10; P2 - P10; P3 - P10; P10 - P8; P2 - P11; P11 - P8; P2 - P8; P3 - P8           |
| TC1200010647.hg.1    | TC1200010647.hg.1 | NR_110589                      | LOC101927318  | 1.02E+08 | 28.95<br>8  | 2.66<br>E-06 | 5.57<br>48 | 4.77<br>E-06 | P10 - ctrl; P3 - ctrl; P8 - ctrl; P10 - P11; P10 - P2; P3 - P11; P8 - P11; P3 - P2; P8 - P2; P8 - P3                                  |
| TC0500011194.hg.1    | TC0500011194.hg.1 | NM_001256566                   | F2RL2         | 2151     | 28.84<br>3  | 2.72<br>E-06 | 5.56<br>54 | 4.86<br>E-06 | ctrl - P10; ctrl - P2; ctrl - P8; P11 - P10; P3 - P10; P11 - P2; P11 - P8; P3 - P2; P3 - P8                                           |
| TC0200007155.hg.1    | TC0200007155.hg.1 | NM_014600                      | EHD3          | 30845    | 28.84<br>2  | 2.72<br>E-06 | 5.56<br>53 | 4.86<br>E-06 | P10 - ctrl; ctrl - P2; P3 - ctrl; P8 - ctrl; P10 - P11; P10 - P2; P3 - P10; P3 - P11; P8 - P11; P3 - P2; P8 - P2                      |
| TC0200015609.hg.1    | TC0200015609.hg.1 | tawgobu.aAug10-<br>unspliced   | tawgobu       | NA       | 28.84<br>8  | 2.72<br>E-06 | 5.56<br>52 | 4.86<br>E-06 | ctrl - P10; ctrl - P11; ctrl - P3; ctrl - P8; P11 - P10; P2 - P10; P2 - P11; P11 - P8; P2 - P3; P2 - P8; P3 - P8                      |
| TC0200012744.hg.1    | TC0200012744.hg.1 | blarklee.aAug10-<br>unspliced  | blarklee      | NA       | 28.79<br>8  | 2.74<br>E-06 | 5.56<br>17 | 4.90<br>E-06 | ctrl - P10; ctrl - P11; ctrl - P3; ctrl - P8; P2 - P10; P10 - P8; P2 - P11; P11 - P8; P2 - P3; P2 - P8; P3 - P8                       |
| TC0200012919.hg.1    | TC0200012919.hg.1 | ENST00000419809.1              | AC010987.5    |          | 28.76<br>4  | 2.76<br>E-06 | 5.55<br>89 | 4.93<br>E-06 | ctrl - P10; ctrl - P2; ctrl - P8; P11 - P10; P2 - P10; P3 - P10; P11 - P2; P11 - P8; P2 - P8; P3 - P8                                 |
| TC0X00010382.hg.1    | TC0X00010382.hg.1 | NM_001012978                   | BEX5          | 340542   | 28.74<br>4  | 2.77<br>E-06 | 5.55<br>73 | 4.94<br>E-06 | ctrl - P10; P11 - ctrl; P2 - ctrl; ctrl - P8; P11 - P10; P2 - P10; P11 - P3; P11 - P8; P2 - P3; P2 - P8; P3 - P8                      |
| TC0500011020.hg.1    | TC0500011020.hg.1 | blystarby.aAug10-<br>unspliced | blystarby     | NA       | 28.72<br>7  | 2.78<br>E-06 | 5.55<br>59 | 4.95<br>E-06 | ctrl - P10; ctrl - P11; P2 - ctrl; ctrl - P8; P11 - P10; P2 - P10; P3 - P10; P2 - P11; P11 - P8; P2 - P3; P2 - P8; P3 - P8            |
| TC0500011043.hg.1    | TC0500011043.hg.1 | lawstarby.aAug10-<br>unspliced | lawstarby     | NA       | 28.72<br>7  | 2.78<br>E-06 | 5.55<br>59 | 4.95<br>E-06 | ctrl - P10; ctrl - P11; P2 - ctrl; ctrl - P8; P11 - P10; P2 - P10; P3 - P10; P2 - P11; P11 - P8; P2 - P3; P2 - P8; P3 - P8            |
| TC1300008090.hg.1    | TC1300008090.hg.1 | stysto.aAug10-<br>unspliced    | stysto        | NA       | 28.72<br>1  | 2.78<br>E-06 | 5.55<br>54 | 4.95<br>E-06 | ctrl - P10; ctrl - P11; ctrl - P3; ctrl - P8; P2 - P10; P10 - P8; P2 - P11; P11 - P8; P2 - P3; P2 - P8; P3 - P8                       |
| TC1000007148.hg.1    | TC1000007148.hg.1 | NA                             | NA            | NA       | 28.69<br>9  | 2.80<br>E-06 | 5.55<br>36 | 4.97<br>E-06 | ctrl - P10; ctrl - P11; P2 - ctrl; ctrl - P3; ctrl - P8; P2 - P10; P3 - P10; P2 - P11; P2 - P3; P2 - P8; P3 - P8                      |
| TC1700009938.hg.1    | TC1700009938.hg.1 | NM_001199989                   | RASD1         | 51655    | 28.67<br>3  | 2.81<br>E-06 | 5.55<br>14 | 4.99<br>E-06 | P10 - ctrl; P8 - ctrl; P10 - P11; P10 - P2; P10 - P3; P3 - P11; P8 - P11; P8 - P2; P8 - P3                                            |
| TC1600008428.hg.1    | TC1600008428.hg.1 | churaw.aAug10-<br>unspliced    | churaw        | NA       | 28.63<br>1  | 2.83<br>E-06 | 5.54<br>8  | 5.03<br>E-06 | ctrl - P10; ctrl - P11; P2 - ctrl; ctrl - P8; P2 - P10; P10 - P8; P2 - P11; P3 - P11; P11 - P8; P2 - P3; P2 - P8; P3 - P8             |
| TC0X00010559.hg.1    | TC0X00010559.hg.1 | NM_001243963                   | LRCH2         | 57631    | 28.62<br>1  | 2.84<br>E-06 | 5.54<br>71 | 5.03<br>E-06 | ctrl - P10; ctrl - P2; ctrl - P3; ctrl - P8; P11 - P10; P2 - P10; P3 - P10; P11 - P2; P11 - P3; P11 - P8; P3 - P8                     |
| TC1200010408.hg.1    | TC1200010408.hg.1 | snufu.aAug10-<br>unspliced     | snufu         | NA       | 28.57<br>7  | 2.86<br>E-06 | 5.54<br>35 | 5.07<br>E-06 | ctrl - P10; ctrl - P11; ctrl - P3; ctrl - P8; P2 - P10; P2 - P11; P11 - P8; P2 - P3; P2 - P8; P3 - P8                                 |
| TC0700013531.hg.1    | TC0700013531.hg.1 | NM_024014                      | HOXA6         | 3203     | 28.55<br>8  | 2.87<br>E-06 | 5.54<br>19 | 5.09<br>E-06 | ctrl - P10; ctrl - P2; ctrl - P3; ctrl - P8; P11 - P10; P2 - P10; P11 - P2; P11 - P3; P11 - P8; P2 - P3                               |
| HTA2-pos-47421984_st | 23150847          | NA                             | NA            | NA       | 28.54<br>2  | 2.88<br>E-06 | 5.54<br>06 | 5.10<br>E-06 | ctrl - P10; ctrl - P11; ctrl - P3; ctrl - P8; P2 - P10; P3 - P10; P10 - P8; P2 - P11; P11 - P8; P2 - P8; P3 - P8                      |
| TC0700008102.hg.1    | TC0700008102.hg.1 | lerblaby.aAug10-<br>unspliced  | lerblaby      | NA       | 28.53<br>9  | 2.88<br>E-06 | 5.54<br>03 | 5.10<br>E-06 | ctrl - P10; ctrl - P11; ctrl - P3; ctrl - P8; P2 - P10; P2 - P11; P11 - P8; P2 - P3; P2 - P8; P3 - P8                                 |
| TC0500008811.hg.1    | TC0500008811.hg.1 | sporspybu.aAug10-<br>unspliced | sporspybu     | NA       | 28.50<br>6  | 2.90<br>E-06 | 5.53<br>76 | 5.12<br>E-06 | ctrl - P10; ctrl - P11; ctrl - P3; ctrl - P8; P2 - P10; P10 - P8; P2 - P11; P11 - P8; P2 - P3; P2 - P8; P3 - P8                       |
| TC1700007174.hg.1    | TC1700007174.hg.1 | NA                             | NA            | NA       | 28.50<br>4  | 2.90<br>E-06 | 5.53<br>74 | 5.12<br>E-06 | P10 - ctrl; P11 - ctrl; P3 - ctrl; P8 - ctrl; P10 - P2; P10 - P3; P10 - P8; P11 - P2; P11 - P3; P11 - P8; P3 - P2; P8 - P2            |
| TC1200007029.hg.1    | TC1200007029.hg.1 | ENST00000535764.1              | RP11-405A12.2 |          | 28.42<br>1  | 2.95<br>E-06 | 5.53<br>05 | 5.20<br>E-06 | ctrl - P10; ctrl - P11; ctrl - P3; ctrl - P8; P11 - P10; P2 - P10; P3 - P10; P2 - P11; P11 - P8; P2 - P3; P2 - P8; P3 - P8            |
| TC1100010948.hg.1    | TC1100010948.hg.1 | NM_005838                      | GLYAT         | 10249    | 28.39<br>1  | 2.96<br>E-06 | 5.52<br>81 | 5.23<br>E-06 | ctrl - P10; P2 - ctrl; P3 - ctrl; P11 - P10; P2 - P10; P3 - P10; P2 - P11; P3 - P11; P11 - P8; P2 - P8; P3 - P8                       |
| TC0100008645.hg.1    | TC0100008645.hg.1 | skernubu.cAug10-<br>unspliced  | skernubu      | NA       | 28.38<br>6  | 2.97<br>E-06 | 5.52<br>77 | 5.23<br>E-06 | ctrl - P10; ctrl - P11; P2 - ctrl; ctrl - P3; ctrl - P8; P2 - P10; P3 - P10; P2 - P11; P3 - P11; P2 - P3; P2 - P8; P3 - P8            |
| TC0200008536.hg.1    | TC0200008536.hg.1 | ANKRD36.veAug10-<br>unspliced  | ANKRD36       | NA       | 28.37<br>7  | 2.97<br>E-06 | 5.52<br>69 | 5.23<br>E-06 | ctrl - P10; ctrl - P11; ctrl - P8; P11 - P10; P2 - P10; P3 - P10; P8 - P10; P2 - P11; P11 - P8; P2 - P3; P2 - P8; P3 - P8             |

|                   |                   |                                |               |          |             |              |            |              |                                                                                                                                       |
|-------------------|-------------------|--------------------------------|---------------|----------|-------------|--------------|------------|--------------|---------------------------------------------------------------------------------------------------------------------------------------|
| TC0200009684.hg.1 | TC0200009684.hg.1 | flawdawbu.aAug10-<br>unspliced | flawdawbu     | NA       | 28.35<br>6  | 2.98<br>E-06 | 5.52<br>51 | 5.25<br>E-06 | ctrl - P10; ctrl - P11; P2 - ctrl; ctrl - P8; P2 - P10; P3 - P10; P10 - P8; P2 - P11; P3 - P11; P11 - P8; P2 - P3; P2 - P8; P3 - P8   |
| TC1500006666.hg.1 | TC1500006666.hg.1 | NR_033351                      | GOLGA8F       | 1E+08    | 28.34<br>5  | 2.99<br>E-06 | 5.52<br>43 | 5.26<br>E-06 | ctrl - P10; ctrl - P11; ctrl - P3; ctrl - P8; P11 - P10; P2 - P10; P2 - P11; P11 - P8; P2 - P3; P2 - P8                               |
| TC0200011885.hg.1 | TC0200011885.hg.1 | NM_001008237                   | TTC32         | 130502   | 28.32<br>2  | 3.00<br>E-06 | 5.52<br>24 | 5.28<br>E-06 | ctrl - P10; ctrl - P2; ctrl - P3; ctrl - P8; P11 - P10; P2 - P10; P3 - P10; P11 - P2; P11 - P3; P11 - P8; P2 - P8; P3 - P8            |
| TC0400011994.hg.1 | TC0400011994.hg.1 | NM_001101669                   | INPP4B        | 8821     | 28.30<br>3  | 3.01<br>E-06 | 5.52<br>08 | 5.29<br>E-06 | P10 - ctrl; P2 - ctrl; P3 - ctrl; P8 - ctrl; P10 - P11; P10 - P2; P10 - P3; P2 - P11; P3 - P11; P8 - P11; P8 - P3                     |
| TC0600013131.hg.1 | TC0600013131.hg.1 | blerklyby.aAug10-<br>unspliced | blerklyby     | NA       | 28.23<br>2  | 3.06<br>E-06 | 5.51<br>47 | 5.37<br>E-06 | ctrl - P10; ctrl - P11; P2 - ctrl; ctrl - P3; ctrl - P8; P2 - P10; P3 - P10; P2 - P11; P3 - P11; P11 - P8; P2 - P3; P2 - P8; P3 - P8  |
| TC0600013119.hg.1 | TC0600013119.hg.1 | NM_001012279                   | SOGA3         | 387104   | 28.19<br>2  | 3.08<br>E-06 | 5.51<br>13 | 5.40<br>E-06 | ctrl - P10; ctrl - P2; P3 - ctrl; ctrl - P8; P11 - P10; P3 - P10; P11 - P2; P3 - P11; P11 - P8; P3 - P2; P3 - P8                      |
| TC1000007705.hg.1 | TC1000007705.hg.1 | zoygleybu.aAug10-<br>unspliced | zoygleybu     | NA       | 28.18<br>5  | 3.08<br>E-06 | 5.51<br>09 | 5.40<br>E-06 | ctrl - P10; ctrl - P11; ctrl - P8; P2 - P10; P3 - P10; P2 - P11; P3 - P11; P2 - P3; P2 - P8; P3 - P8                                  |
| TC0900007729.hg.1 | TC0900007729.hg.1 | uc064tyu.1                     | RNU4-29P      | NA       | 28.16<br>3  | 3.10<br>E-06 | 5.50<br>91 | 5.42<br>E-06 | ctrl - P10; ctrl - P11; ctrl - P3; ctrl - P8; P2 - P10; P3 - P10; P2 - P11; P3 - P11; P11 - P8; P2 - P3; P2 - P8; P3 - P8             |
| TC0100017449.hg.1 | TC0100017449.hg.1 | NM_001143962                   | CAPN8         | 388743   | 28.15<br>2  | 3.10<br>E-06 | 5.50<br>81 | 5.43<br>E-06 | ctrl - P10; ctrl - P11; ctrl - P3; ctrl - P8; P11 - P10; P2 - P10; P2 - P11; P11 - P8; P2 - P3; P2 - P8                               |
| TC0600008093.hg.1 | TC0600008093.hg.1 | NA                             | NA            | NA       | 28.10<br>6  | 3.13<br>E-06 | 5.50<br>43 | 5.48<br>E-06 | ctrl - P10; ctrl - P11; ctrl - P3; ctrl - P8; P11 - P10; P2 - P10; P3 - P10; P2 - P11; P11 - P8; P2 - P3; P2 - P8; P3 - P8            |
| TC0600013885.hg.1 | TC0600013885.hg.1 | sneejo.aAug10-<br>unspliced    | sneejo        | NA       | 28.09<br>2  | 3.14<br>E-06 | 5.50<br>31 | 5.48<br>E-06 | ctrl - P10; ctrl - P11; ctrl - P2; ctrl - P3; ctrl - P8; P11 - P10; P2 - P10; P11 - P3; P11 - P8; P2 - P3; P2 - P8; P3 - P8           |
| TC0100015783.hg.1 | TC0100015783.hg.1 | NM_000449                      | RFX5          | 5993     | 28.09<br>3  | 3.14<br>E-06 | 5.50<br>3  | 5.48<br>E-06 | P10 - ctrl; ctrl - P11; ctrl - P2; P8 - ctrl; P10 - P11; P10 - P2; P10 - P3; P11 - P2; P3 - P11; P8 - P11; P3 - P2; P8 - P2; P8 - P3  |
| TC1800006591.hg.1 | TC1800006591.hg.1 | peykler.aAug10-<br>unspliced   | peykler       | NA       | 28.09<br>2  | 3.14<br>E-06 | 5.50<br>29 | 5.48<br>E-06 | ctrl - P10; ctrl - P11; ctrl - P2; ctrl - P8; P2 - P10; P3 - P10; P2 - P11; P3 - P11; P2 - P3; P2 - P8; P3 - P8                       |
| TC0700011984.hg.1 | TC0700011984.hg.1 | uc064gcw.1                     | AC005071.3    | NA       | 28.02<br>3  | 3.18<br>E-06 | 5.49<br>73 | 5.55<br>E-06 | ctrl - P10; ctrl - P11; ctrl - P3; ctrl - P8; P2 - P10; P3 - P10; P2 - P11; P2 - P3; P2 - P8; P3 - P8                                 |
| TC0400007270.hg.1 | TC0400007270.hg.1 | NM_138389                      | FAM114A1      | 92689    | 28.01<br>9  | 3.18<br>E-06 | 5.49<br>69 | 5.55<br>E-06 | P3 - ctrl; P8 - ctrl; P10 - P11; P10 - P2; P3 - P10; P8 - P10; P3 - P11; P8 - P11; P3 - P2; P8 - P2; P3 - P8                          |
| TC0500009414.hg.1 | TC0500009414.hg.1 | NA                             | NA            | NA       | 28.01<br>8  | 3.19<br>E-06 | 5.49<br>69 | 5.55<br>E-06 | ctrl - P10; ctrl - P11; P2 - ctrl; ctrl - P3; ctrl - P8; P2 - P10; P2 - P11; P2 - P3; P2 - P8                                         |
| TC1400007089.hg.1 | TC1400007089.hg.1 | NA                             | NA            | NA       | 27.97<br>7  | 3.21<br>E-06 | 5.49<br>34 | 5.59<br>E-06 | ctrl - P10; ctrl - P11; ctrl - P3; ctrl - P8; P11 - P10; P2 - P10; P3 - P10; P2 - P11; P11 - P8; P2 - P3; P2 - P8; P3 - P8            |
| TC1200012299.hg.1 | TC1200012299.hg.1 | ENST00000602558.1              | RP11-214K3.18 |          | 27.97<br>96 | 3.22<br>E-06 | 5.49<br>2  | 5.60<br>E-06 | ctrl - P10; ctrl - P11; ctrl - P3; ctrl - P8; P11 - P10; P2 - P10; P10 - P8; P2 - P11; P11 - P8; P2 - P3; P2 - P8; P3 - P8            |
| TC0400007803.hg.1 | TC0400007803.hg.1 | nokime.aAug10-<br>unspliced    | nokime        | NA       | 27.93<br>4  | 3.24<br>E-06 | 5.48<br>98 | 5.63<br>E-06 | ctrl - P10; ctrl - P3; ctrl - P8; P11 - P10; P2 - P10; P11 - P3; P11 - P8; P2 - P3; P2 - P8                                           |
| TC1100012426.hg.1 | TC1100012426.hg.1 | ENST00000454832.1              | SIK3-IT1      |          | 27.92<br>1  | 3.25<br>E-06 | 5.48<br>87 | 5.63<br>E-06 | ctrl - P10; ctrl - P11; ctrl - P3; ctrl - P8; P11 - P10; P2 - P10; P3 - P10; P2 - P11; P11 - P8; P2 - P3; P2 - P8; P3 - P8            |
| TC0800012463.hg.1 | TC0800012463.hg.1 | NR_108049                      | CCAT1         | 1.01E+08 | 27.91<br>7  | 3.25<br>E-06 | 5.48<br>84 | 5.63<br>E-06 | P10 - ctrl; P3 - ctrl; P8 - ctrl; P10 - P11; P10 - P2; P8 - P10; P3 - P11; P8 - P11; P3 - P2; P8 - P2                                 |
| TC0800011679.hg.1 | TC0800011679.hg.1 | NM_014109                      | ATAD2         | 29028    | 27.91<br>4  | 3.25<br>E-06 | 5.48<br>81 | 5.63<br>E-06 | P10 - ctrl; ctrl - P11; P3 - ctrl; P8 - ctrl; P10 - P11; P10 - P2; P8 - P10; P3 - P11; P8 - P11; P3 - P2; P8 - P2; P8 - P3            |
| TC1600007897.hg.1 | TC1600007897.hg.1 | chaworbu.aAug10-<br>unspliced  | chaworbu      | NA       | 27.91<br>3  | 3.25<br>E-06 | 5.48<br>8  | 5.63<br>E-06 | ctrl - P10; ctrl - P3; ctrl - P8; P11 - P10; P2 - P10; P3 - P10; P2 - P11; P11 - P8; P2 - P3; P2 - P8; P3 - P8                        |
| TC0900009427.hg.1 | TC0900009427.hg.1 | NA                             | NA            | NA       | 27.89<br>1  | 3.26<br>E-06 | 5.48<br>62 | 5.65<br>E-06 | ctrl - P10; ctrl - P11; P2 - ctrl; ctrl - P3; ctrl - P8; P2 - P10; P2 - P11; P11 - P8; P2 - P3; P2 - P8; P3 - P8                      |
| TC0600011231.hg.1 | TC0600011231.hg.1 | uc063mkg.1                     | Z98744.2      | NA       | 27.84<br>5  | 3.29<br>E-06 | 5.48<br>23 | 5.70<br>E-06 | P10 - ctrl; P11 - ctrl; P8 - ctrl; P10 - P11; P10 - P2; P10 - P3; P11 - P2; P11 - P3; P8 - P11; P8 - P2; P8 - P3                      |
| TC0700010992.hg.1 | TC0700010992.hg.1 | forblaw.aAug10-<br>unspliced   | forblaw       |          | 27.84<br>2  | 3.30<br>E-06 | 5.48<br>2  | 5.70<br>E-06 | ctrl - P10; ctrl - P11; ctrl - P3; ctrl - P8; P11 - P10; P2 - P10; P3 - P10; P2 - P11; P11 - P8; P2 - P3; P2 - P8; P3 - P8            |
| TC0200006527.hg.1 | TC0200006527.hg.1 | NA                             | NA            | NA       | 27.83<br>6  | 3.30<br>E-06 | 5.48<br>15 | 5.70<br>E-06 | ctrl - P10; ctrl - P11; ctrl - P2; ctrl - P8; P11 - P10; P2 - P10; P3 - P10; P11 - P8; P2 - P3; P2 - P8; P3 - P8                      |
| TC0500012806.hg.1 | TC0500012806.hg.1 | goyshaby.aAug10-<br>unspliced  | goyshaby      | NA       | 27.79<br>8  | 3.32<br>E-06 | 5.47<br>83 | 5.74<br>E-06 | P10 - ctrl; P11 - ctrl; P3 - ctrl; P8 - ctrl; P10 - P11; P10 - P2; P11 - P2; P3 - P11; P8 - P11; P3 - P2; P8 - P2                     |
| TC0500007467.hg.1 | TC0500007467.hg.1 | floystobu.aAug10-<br>unspliced | floystobu     | NA       | 27.78<br>6  | 3.33<br>E-06 | 5.47<br>73 | 5.75<br>E-06 | ctrl - P10; ctrl - P11; ctrl - P3; ctrl - P8; P11 - P10; P2 - P10; P2 - P11; P11 - P8; P2 - P3; P2 - P8; P3 - P8                      |
| TC0700013514.hg.1 | TC0700013514.hg.1 | NA                             | NA            | NA       | 27.75<br>9  | 3.35<br>E-06 | 5.47<br>5  | 5.77<br>E-06 | ctrl - P10; ctrl - P11; ctrl - P2; ctrl - P3; ctrl - P8; P11 - P10; P2 - P10; P3 - P10; P11 - P8; P2 - P8; P3 - P8                    |
| TC1100012963.hg.1 | TC1100012963.hg.1 | NR_034137                      | ZBED5-AS1     | 729013   | 27.75<br>8  | 3.35<br>E-06 | 5.47<br>49 | 5.77<br>E-06 | ctrl - P10; P11 - ctrl; ctrl - P2; ctrl - P3; ctrl - P8; P11 - P10; P10 - P3; P11 - P2; P11 - P3; P11 - P8; P2 - P3; P2 - P8; P3 - P8 |
| TC0300008941.hg.1 | TC0300008941.hg.1 | neko.yu.aAug10-<br>unspliced   | neko.yu       | NA       | 27.72<br>8  | 3.37<br>E-06 | 5.47<br>24 | 5.80<br>E-06 | ctrl - P10; ctrl - P11; ctrl - P3; ctrl - P8; P2 - P10; P3 - P10; P2 - P11; P11 - P8; P2 - P3; P2 - P8; P3 - P8                       |
| TC0100014857.hg.1 | TC0100014857.hg.1 | NM_001134486                   | GBP5          | 115362   | 27.67<br>8  | 3.40<br>E-06 | 5.46<br>81 | 5.86<br>E-06 | P10 - ctrl; P3 - ctrl; P8 - ctrl; P10 - P11; P10 - P2; P8 - P10; P3 - P11; P8 - P11; P3 - P2; P8 - P2                                 |
| TC0800008833.hg.1 | TC0800008833.hg.1 | NR_109833                      | PRNCR1        | 1.02E+08 | 27.65<br>8  | 3.42<br>E-06 | 5.46<br>64 | 5.88<br>E-06 | ctrl - P10; P2 - ctrl; ctrl - P8; P11 - P10; P2 - P10; P3 - P10; P2 - P11; P3 - P11; P11 - P8; P2 - P3; P2 - P8; P3 - P8              |

|                          |                   |                                |               |                                       |                |              |            |              |                                                                                                                                       |
|--------------------------|-------------------|--------------------------------|---------------|---------------------------------------|----------------|--------------|------------|--------------|---------------------------------------------------------------------------------------------------------------------------------------|
| TC1000010777.hg.1        | TC1000010777.hg.1 | versha.aAug10-<br>unspliced    | versha        | NA                                    | 27.<br>63<br>5 | 3.43<br>E-06 | 5.46<br>45 | 5.90<br>E-06 | ctrl - P10; ctrl - P11; P2 - ctrl; ctrl - P3; ctrl - P8; P2 - P10; P10 - P8; P2 - P11; P3 - P11; P11 - P8; P2 - P3; P2 - P8; P3 - P8  |
| TC0700011774.hg.1        | TC0700011774.hg.1 | mawmer.aAug10-<br>unspliced    | mawmer        | NA                                    | 27.<br>58<br>2 | 3.47<br>E-06 | 5.46<br>5  | 5.95<br>E-06 | ctrl - P10; ctrl - P11; ctrl - P3; ctrl - P8; P11 - P10; P2 - P10; P3 - P10; P2 - P11; P11 - P8; P2 - P3; P2 - P8; P3 - P8            |
| TC0400010243.hg.1        | TC0400010243.hg.1 | jarsmerby.aAug10-<br>unspliced | jarsmerby     | NA                                    | 27.<br>58<br>2 | 3.47<br>E-06 | 5.46<br>5  | 5.95<br>E-06 | ctrl - P10; ctrl - P11; ctrl - P3; ctrl - P8; P11 - P10; P2 - P10; P2 - P11; P11 - P3; P11 - P8; P2 - P3; P2 - P8                     |
| TC0100013293.hg.1        | TC0100013293.hg.1 | NM_002167                      | ID3           | 3399                                  | 27.<br>5       | 3.52<br>E-06 | 5.45<br>3  | 6.04<br>E-06 | ctrl - P10; P11 - ctrl; ctrl - P2; ctrl - P3; ctrl - P8; P11 - P10; P11 - P2; P11 - P3; P11 - P8                                      |
| TC0X00008514.hg.1        | TC0X00008514.hg.1 | NM_182540                      | DDX26B        | His)<br>box<br>polype<br>ptide<br>26B | 27.<br>48<br>7 | 3.53<br>E-06 | 5.45<br>18 | 6.06<br>E-06 | ctrl - P10; ctrl - P11; ctrl - P2; ctrl - P3; ctrl - P8; P11 - P10; P2 - P10; P3 - P10; P11 - P3; P11 - P8; P2 - P3; P2 - P8; P3 - P8 |
| TC1200007613.hg.1        | TC1200007613.hg.1 | jarchar.aAug10-<br>unspliced   | jarchar       | NA                                    | 27.<br>46<br>2 | 3.55<br>E-06 | 5.44<br>97 | 6.08<br>E-06 | ctrl - P10; ctrl - P11; ctrl - P3; ctrl - P8; P11 - P10; P2 - P10; P2 - P11; P11 - P3; P11 - P8; P2 - P3; P2 - P8                     |
| TC1100010108.hg.1        | TC1100010108.hg.1 | stoyglor.aAug10-<br>unspliced  | stoyglor      | NA                                    | 27.<br>42<br>3 | 3.58<br>E-06 | 5.44<br>64 | 6.12<br>E-06 | ctrl - P10; ctrl - P11; ctrl - P3; ctrl - P8; P11 - P10; P2 - P10; P3 - P10; P11 - P3; P11 - P8; P2 - P3; P2 - P8; P3 - P8            |
| TC0900011715.hg.1        | TC0900011715.hg.1 | bertybu.aAug10-<br>unspliced   | bertybu       | NA                                    | 27.<br>40<br>7 | 3.59<br>E-06 | 5.44<br>5  | 6.14<br>E-06 | ctrl - P10; ctrl - P11; ctrl - P3; ctrl - P8; P2 - P10; P10 - P3; P10 - P8; P2 - P11; P11 - P3; P11 - P8; P2 - P3; P2 - P8            |
| TC0400010787.hg.1        | TC0400010787.hg.1 | shyboybo.aAug10-<br>unspliced  | shyboybo      | NA                                    | 27.<br>39<br>3 | 3.60<br>E-06 | 5.44<br>38 | 6.15<br>E-06 | ctrl - P10; ctrl - P11; ctrl - P8; P2 - P10; P3 - P10; P2 - P11; P3 - P11; P2 - P3; P2 - P8; P3 - P8                                  |
| TC1300006717.hg.1        | TC1300006717.hg.1 | sysheebu.aAug10-<br>unspliced  | sysheebu      | NA                                    | 27.<br>35<br>6 | 3.63<br>E-06 | 5.44<br>06 | 6.19<br>E-06 | ctrl - P10; ctrl - P11; ctrl - P3; ctrl - P8; P11 - P10; P2 - P10; P10 - P8; P2 - P11; P11 - P8; P2 - P3; P2 - P8; P3 - P8            |
| TC1500008526.hg.1        | TC1500008526.hg.1 | soharu.aAug10-<br>unspliced    | soharu        | NA                                    | 27.<br>34<br>4 | 3.63<br>E-06 | 5.43<br>96 | 6.20<br>E-06 | ctrl - P10; ctrl - P11; ctrl - P3; ctrl - P8; P11 - P10; P2 - P10; P3 - P10; P2 - P11; P11 - P8; P2 - P3; P2 - P8; P3 - P8            |
| TC0800011956.hg.1        | TC0800011956.hg.1 | ENST00000612268                | MIR7641-1     | 1.02E+<br>08                          | 27.<br>33<br>6 | 3.64<br>E-06 | 5.43<br>89 | 6.21<br>E-06 | P11 - ctrl; P2 - ctrl; P3 - ctrl; P11 - P10; P2 - P10; P3 - P10; P2 - P11; P3 - P11; P2 - P3; P2 - P8; P3 - P8                        |
| TC1600008887.hg.1        | TC1600008887.hg.1 | OTTHUMT00000474<br>478         | RP11-104N10.2 |                                       | 27.<br>28<br>2 | 3.68<br>E-06 | 5.43<br>43 | 6.27<br>E-06 | ctrl - P10; ctrl - P11; ctrl - P3; ctrl - P8; P2 - P10; P2 - P11; P11 - P8; P2 - P3; P2 - P8; P3 - P8                                 |
| TC0600011601.hg.1        | TC0600011601.hg.1 | sneeglyby.aAug10-<br>unspliced | sneeglyby     | NA                                    | 27.<br>27<br>9 | 3.68<br>E-06 | 5.43<br>4  | 6.27<br>E-06 | ctrl - P10; ctrl - P11; P2 - ctrl; ctrl - P3; ctrl - P8; P2 - P10; P3 - P10; P2 - P11; P11 - P8; P2 - P3; P2 - P8; P3 - P8            |
| TC1700009890.hg.1        | TC1700009890.hg.1 | ENST00000583934.<br>1          | RP11-138I1.4  |                                       | 27.<br>27<br>7 | 3.68<br>E-06 | 5.43<br>38 | 6.27<br>E-06 | P10 - ctrl; P11 - ctrl; P3 - ctrl; P8 - ctrl; P10 - P11; P10 - P2; P10 - P3; P10 - P8; P11 - P2; P3 - P2; P8 - P2                     |
| TC0400012828.hg.1        | TC0400012828.hg.1 | NM_001083907                   | BANK1         | 55024                                 | 27.<br>26<br>2 | 3.69<br>E-06 | 5.43<br>25 | 6.28<br>E-06 | P10 - ctrl; P3 - ctrl; P8 - ctrl; P10 - P11; P10 - P2; P3 - P11; P8 - P11; P3 - P2; P8 - P2; P8 - P3                                  |
| TC0100009271.hg.1        | TC0100009271.hg.1 | yoreha.aAug10-<br>unspliced    | yoreha        | NA                                    | 27.<br>22<br>9 | 3.72<br>E-06 | 5.42<br>96 | 6.32<br>E-06 | ctrl - P10; ctrl - P11; ctrl - P3; ctrl - P8; P11 - P10; P2 - P10; P2 - P11; P11 - P8; P2 - P3; P2 - P8                               |
| HTA2-pos-<br>47421979_st | 23150843          | NA                             | NA            | NA                                    | 27.<br>22<br>6 | 3.72<br>E-06 | 5.42<br>94 | 6.32<br>E-06 | ctrl - P10; ctrl - P11; ctrl - P3; ctrl - P8; P11 - P10; P2 - P10; P3 - P10; P2 - P11; P11 - P8; P2 - P3; P2 - P8; P3 - P8            |
| TC0600012866.hg.1        | TC0600012866.hg.1 | weesporby.aAug10-<br>unspliced | weesporby     | NA                                    | 27.<br>22<br>2 | 3.72<br>E-06 | 5.42<br>91 | 6.32<br>E-06 | ctrl - P10; ctrl - P11; ctrl - P3; ctrl - P8; P2 - P10; P3 - P10; P2 - P11; P3 - P11; P2 - P3; P2 - P8; P3 - P8                       |
| TC0100017540.hg.1        | TC0100017540.hg.1 | shorobo.aAug10-<br>unspliced   | shorobo       | NA                                    | 27.<br>22<br>2 | 3.72<br>E-06 | 5.42<br>9  | 6.32<br>E-06 | ctrl - P10; ctrl - P11; ctrl - P2; ctrl - P3; ctrl - P8; P11 - P10; P2 - P10; P11 - P3; P11 - P8; P2 - P3; P2 - P8                    |
| TC0900010088.hg.1        | TC0900010088.hg.1 | dawterbo.aAug10-<br>unspliced  | dawterbo      |                                       | 27.<br>20<br>9 | 3.73<br>E-06 | 5.42<br>8  | 6.33<br>E-06 | ctrl - P10; ctrl - P11; ctrl - P3; ctrl - P8; P11 - P10; P2 - P10; P3 - P10; P2 - P11; P11 - P8; P2 - P3; P2 - P8; P3 - P8            |
| TC0200009072.hg.1        | TC0200009072.hg.1 | NA                             | NA            | NA                                    | 27.<br>20<br>4 | 3.74<br>E-06 | 5.42<br>75 | 6.33<br>E-06 | ctrl - P10; ctrl - P3; ctrl - P8; P11 - P10; P2 - P10; P10 - P8; P2 - P11; P11 - P3; P11 - P8; P2 - P3; P2 - P8                       |
| TC0600010935.hg.1        | TC0600010935.hg.1 | rurome.aAug10-<br>unspliced    | rurome        | NA                                    | 27.<br>15<br>9 | 3.77<br>E-06 | 5.42<br>36 | 6.38<br>E-06 | ctrl - P11; P2 - ctrl; ctrl - P8; P2 - P10; P3 - P10; P10 - P8; P2 - P11; P3 - P11; P11 - P8; P2 - P3; P2 - P8; P3 - P8               |
| TC0700010406.hg.1        | TC0700010406.hg.1 | NA                             | NA            | NA                                    | 27.<br>15<br>5 | 3.78<br>E-06 | 5.42<br>28 | 6.39<br>E-06 | P10 - ctrl; P11 - ctrl; P3 - ctrl; P8 - ctrl; P10 - P11; P10 - P2; P10 - P3; P11 - P2; P8 - P11; P3 - P2; P8 - P2; P8 - P3            |
| TC2100006826.hg.1        | TC2100006826.hg.1 | NR_024357                      | LINC00113     | 54088                                 | 27.<br>13<br>5 | 3.79<br>E-06 | 5.42<br>16 | 6.41<br>E-06 | ctrl - P10; P11 - ctrl; ctrl - P3; ctrl - P8; P11 - P10; P2 - P10; P11 - P2; P11 - P3; P11 - P8; P2 - P3; P2 - P8                     |
| TC0900011343.hg.1        | TC0900011343.hg.1 | NA                             | NA            | NA                                    | 27.<br>11<br>9 | 3.80<br>E-06 | 5.42<br>01 | 6.42<br>E-06 | ctrl - P10; ctrl - P11; ctrl - P8; P2 - P10; P3 - P10; P2 - P11; P3 - P11; P2 - P3; P2 - P8; P3 - P8                                  |
| TC0400008485.hg.1        | TC0400008485.hg.1 | NA                             | NA            | NA                                    | 27.<br>10<br>8 | 3.81<br>E-06 | 5.41<br>92 | 6.43<br>E-06 | ctrl - P10; ctrl - P11; ctrl - P3; ctrl - P8; P11 - P10; P2 - P10; P11 - P3; P11 - P8; P2 - P3; P2 - P8                               |
| TC0400008147.hg.1        | TC0400008147.hg.1 | joybubo.aAug10-<br>unspliced   | joybubo       | NA                                    | 27.<br>09<br>6 | 3.82<br>E-06 | 5.41<br>81 | 6.44<br>E-06 | ctrl - P10; P11 - ctrl; ctrl - P3; ctrl - P8; P11 - P10; P2 - P10; P11 - P2; P11 - P3; P11 - P8; P2 - P3; P2 - P8                     |
| TC1700008380.hg.1        | TC1700008380.hg.1 | jawserbo.aAug10-<br>unspliced  | jawserbo      | NA                                    | 27.<br>09<br>4 | 3.82<br>E-06 | 5.41<br>8  | 6.44<br>E-06 | ctrl - P10; ctrl - P11; ctrl - P8; P2 - P10; P3 - P10; P2 - P11; P3 - P11; P11 - P8; P2 - P3; P2 - P8                                 |
| TC1600009680.hg.1        | TC1600009680.hg.1 | NA                             | NA            | NA                                    | 27.<br>04<br>2 | 3.86<br>E-06 | 5.41<br>35 | 6.50<br>E-06 | ctrl - P10; ctrl - P11; P2 - ctrl; ctrl - P3; ctrl - P8; P2 - P10; P2 - P11; P2 - P3; P2 - P8                                         |
| TC0100011382.hg.1        | TC0100011382.hg.1 | NM_001004023                   | DYRK3         | 8444                                  | 27.<br>01<br>6 | 3.88<br>E-06 | 5.41<br>12 | 6.53<br>E-06 | ctrl - P10; ctrl - P2; ctrl - P3; ctrl - P8; P11 - P10; P2 - P10; P3 - P10; P11 - P2; P11 - P3; P11 - P8; P2 - P8; P3 - P8            |
| TC0200014089.hg.1        | TC0200014089.hg.1 | ronemo.bAug10-<br>unspliced    | ronemo        | NA                                    | 26.<br>99<br>8 | 3.89<br>E-06 | 5.40<br>97 | 6.55<br>E-06 | ctrl - P10; ctrl - P11; ctrl - P2; ctrl - P8; P11 - P10; P2 - P10; P3 - P10; P2 - P11; P3 - P11; P11 - P8; P2 - P8; P3 - P8           |

|                   |                   |                                |               |         |       |              |            |              |                                                                                                                                      |
|-------------------|-------------------|--------------------------------|---------------|---------|-------|--------------|------------|--------------|--------------------------------------------------------------------------------------------------------------------------------------|
| TC0800007871.hg.1 | TC0800007871.hg.1 | uc064nlz.1                     | RNA5SP268     | NA      | 26.95 | 3.93<br>E-06 | 5.40<br>61 | 6.60<br>E-06 | ctrl - P10; ctrl - P11; P2 - ctrl; ctrl - P3; ctrl - P8; P2 - P10; P2 - P11; P2 - P3; P2 - P8                                        |
| TC0800007676.hg.1 | TC0800007676.hg.1 | munumu.aAug10-<br>unspliced    | munumu        | NA      | 26.93 | 3.95<br>E-06 | 5.40<br>39 | 6.63<br>E-06 | ctrl - P10; ctrl - P11; P2 - ctrl; ctrl - P8; P2 - P10; P3 - P10; P2 - P11; P3 - P11; P2 - P3; P2 - P8; P3 - P8                      |
| TC0600007899.hg.1 | TC0600007899.hg.1 | leegloby.aAug10-<br>unspliced  | leegloby      | NA      | 26.93 | 3.95<br>E-06 | 5.40<br>39 | 6.63<br>E-06 | ctrl - P10; ctrl - P11; ctrl - P3; ctrl - P8; P2 - P10; P3 - P10; P2 - P11; P3 - P11; P2 - P3; P2 - P8; P3 - P8                      |
| TC0100008795.hg.1 | TC0100008795.hg.1 | NA                             | NA            | NA      | 26.90 | 3.97<br>E-06 | 5.40<br>13 | 6.66<br>E-06 | ctrl - P10; ctrl - P3; ctrl - P8; P11 - P10; P2 - P10; P3 - P10; P2 - P11; P11 - P8; P2 - P3; P2 - P8; P3 - P8                       |
| TC1700009659.hg.1 | TC1700009659.hg.1 | NA                             | NA            | NA      | 26.86 | 4.00<br>E-06 | 5.39<br>84 | 6.70<br>E-06 | ctrl - P10; ctrl - P11; ctrl - P3; ctrl - P8; P11 - P10; P2 - P10; P2 - P11; P11 - P3; P2 - P3; P2 - P8                              |
| TC0900010278.hg.1 | TC0900010278.hg.1 | NR_046175_2                    | LOC286297     | NA      | 26.85 | 4.01<br>E-06 | 5.39<br>74 | 6.71<br>E-06 | P10 - ctrl; P3 - ctrl; P8 - ctrl; P10 - P11; P10 - P2; P3 - P10; P8 - P10; P3 - P11; P8 - P11; P3 - P2; P2 - P8; P2 - P8             |
| TC1700007382.hg.1 | TC1700007382.hg.1 | kercho.aAug10-<br>unspliced    | kercho        | NA      | 26.70 | 4.13<br>E-06 | 5.38<br>43 | 6.91<br>E-06 | ctrl - P10; ctrl - P11; ctrl - P3; ctrl - P8; P2 - P10; P2 - P11; P11 - P8; P2 - P3; P2 - P8; P3 - P8                                |
| TC0100015113.hg.1 | TC0100015113.hg.1 | ENST00000438604                | RP5-1108M17.5 | NA      | 26.68 | 4.15<br>E-06 | 5.38<br>23 | 6.94<br>E-06 | ctrl - P10; ctrl - P11; P2 - ctrl; ctrl - P3; ctrl - P8; P2 - P10; P2 - P11; P11 - P3; P11 - P8; P2 - P3; P2 - P8                    |
| TC0200012340.hg.1 | TC0200012340.hg.1 | blyklaw.aAug10-<br>unspliced   | blyklaw       | NA      | 26.65 | 4.17<br>E-06 | 5.37<br>97 | 6.97<br>E-06 | P10 - ctrl; P2 - ctrl; P10 - P11; P2 - P10; P10 - P3; P10 - P8; P2 - P11; P2 - P3; P2 - P8                                           |
| TC1100007999.hg.1 | TC1100007999.hg.1 | heti.aAug10-<br>unspliced      | heti          | NA      | 26.65 | 4.17<br>E-06 | 5.37<br>96 | 6.97<br>E-06 | ctrl - P10; ctrl - P11; ctrl - P3; ctrl - P8; P11 - P10; P2 - P10; P2 - P11; P11 - P8; P2 - P3; P2 - P8                              |
| TC1100012825.hg.1 | TC1100012825.hg.1 | uc058jdc.1                     | AP003041.1    | NA      | 26.62 | 4.20<br>E-06 | 5.37<br>71 | 7.01<br>E-06 | P10 - ctrl; P11 - ctrl; P3 - ctrl; P8 - ctrl; P10 - P2; P10 - P3; P11 - P2; P11 - P3; P3 - P2; P8 - P2; P8 - P3                      |
| TC1100009818.hg.1 | TC1100009818.hg.1 | sawkeeby.aAug10-<br>unspliced  | sawkeeby      | NA      | 26.61 | 4.20<br>E-06 | 5.37<br>65 | 7.02<br>E-06 | ctrl - P10; ctrl - P11; ctrl - P3; ctrl - P8; P2 - P10; P10 - P8; P2 - P11; P11 - P8; P2 - P3; P2 - P8; P3 - P8                      |
| TC1300007836.hg.1 | TC1300007836.hg.1 | jydeebby.aAug10-<br>unspliced  | jydeebby      | NA      | 26.60 | 4.22<br>E-06 | 5.37<br>5  | 7.04<br>E-06 | ctrl - P10; ctrl - P11; ctrl - P3; ctrl - P8; P11 - P10; P2 - P10; P2 - P11; P11 - P8; P2 - P3; P2 - P8; P3 - P8                     |
| TC0100015212.hg.1 | TC0100015212.hg.1 | NM_024526                      | EPS8L3        | 79574   | 26.56 | 4.25<br>E-06 | 5.37<br>13 | 7.09<br>E-06 | P10 - ctrl; P11 - ctrl; P2 - ctrl; P3 - ctrl; P8 - ctrl; P10 - P11; P10 - P2; P10 - P3; P8 - P11; P8 - P2; P8 - P3                   |
| TC2000008818.hg.1 | TC2000008818.hg.1 | deyroybu.bAug10-<br>unspliced  | deyroybu      | NA      | 26.53 | 4.28<br>E-06 | 5.36<br>86 | 7.13<br>E-06 | ctrl - P11; P2 - ctrl; P3 - ctrl; ctrl - P8; P10 - P11; P2 - P10; P3 - P10; P10 - P8; P2 - P11; P3 - P11; P2 - P8; P3 - P8           |
| TC0800011691.hg.1 | TC0800011691.hg.1 | NM_001003954                   | ANXA13        | 312     | 26.52 | 4.29<br>E-06 | 5.36<br>77 | 7.14<br>E-06 | ctrl - P10; P11 - ctrl; P3 - ctrl; P11 - P10; P2 - P10; P3 - P10; P3 - P11; P11 - P8; P3 - P2; P2 - P8; P3 - P8                      |
| TC0100007270.hg.1 | TC0100007270.hg.1 | ENST00000606754.1              | RP1-224A6.9   |         | 26.50 | 4.30<br>E-06 | 5.36<br>66 | 7.15<br>E-06 | ctrl - P10; ctrl - P11; ctrl - P3; ctrl - P8; P2 - P10; P3 - P10; P2 - P11; P3 - P11; P2 - P3; P2 - P8; P3 - P8                      |
| TC1000011515.hg.1 | TC1000011515.hg.1 | NM_001114094                   | BLNK          | 29760   | 26.47 | 4.32<br>E-06 | 5.36<br>41 | 7.19<br>E-06 | ctrl - P10; ctrl - P2; ctrl - P3; ctrl - P8; P11 - P10; P10 - P3; P11 - P2; P11 - P3; P11 - P8; P2 - P3                              |
| TC0600011972.hg.1 | TC0600011972.hg.1 | mejee.aAug10-<br>unspliced     | mejee         | NA      | 26.43 | 4.36<br>E-06 | 5.36<br>02 | 7.25<br>E-06 | P10 - ctrl; P2 - ctrl; P3 - ctrl; P8 - ctrl; P3 - P10; P8 - P10; P2 - P11; P3 - P11; P8 - P11; P3 - P2; P8 - P2                      |
| TC1500006584.hg.1 | TC1500006584.hg.1 | NR_003298                      | SNORD115-6    | 15q11.2 | 26.40 | 4.39<br>E-06 | 5.35<br>76 | 7.29<br>E-06 | P10 - ctrl; P3 - ctrl; P8 - ctrl; P10 - P11; P10 - P2; P3 - P10; P3 - P11; P8 - P11; P3 - P2; P8 - P2; P3 - P8                       |
| TC1500007739.hg.1 | TC1500007739.hg.1 | NM_001286429                   | THSD4         | 79875   | 26.38 | 4.41<br>E-06 | 5.35<br>56 | 7.32<br>E-06 | P10 - ctrl; ctrl - P2; P3 - ctrl; P8 - ctrl; P10 - P2; P3 - P10; P8 - P10; P11 - P2; P3 - P11; P8 - P11; P3 - P2; P8 - P2            |
| TC0200010682.hg.1 | TC0200010682.hg.1 | NA                             | NA            | NA      | 26.37 | 4.42<br>E-06 | 5.35<br>46 | 7.33<br>E-06 | ctrl - P10; ctrl - P3; ctrl - P8; P11 - P10; P2 - P10; P10 - P3; P11 - P3; P11 - P8; P2 - P3; P2 - P8                                |
| TC0200010412.hg.1 | TC0200010412.hg.1 | stagabu.aAug10-<br>unspliced   | stagabu       | NA      | 26.36 | 4.43<br>E-06 | 5.35<br>39 | 7.34<br>E-06 | ctrl - P10; ctrl - P11; ctrl - P8; P11 - P10; P2 - P10; P3 - P10; P2 - P11; P3 - P11; P11 - P8; P2 - P3; P2 - P8; P3 - P8            |
| TC2200008593.hg.1 | TC2200008593.hg.1 | NA                             | NA            | NA      | 26.32 | 4.46<br>E-06 | 5.35<br>07 | 7.39<br>E-06 | P10 - ctrl; P11 - ctrl; P8 - ctrl; P10 - P11; P10 - P2; P10 - P3; P11 - P2; P8 - P11; P8 - P2; P8 - P3                               |
| TC0800010799.hg.1 | TC0800010799.hg.1 | NA                             | NA            | NA      | 26.31 | 4.47<br>E-06 | 5.34<br>92 | 7.41<br>E-06 | ctrl - P10; ctrl - P11; ctrl - P8; P11 - P10; P2 - P10; P3 - P10; P8 - P10; P11 - P8; P2 - P8; P3 - P8                               |
| TC0600009147.hg.1 | TC0600009147.hg.1 | ENST00000607434.1              | RP5-1112D6.8  |         | 26.25 | 4.53<br>E-06 | 5.34<br>41 | 7.49<br>E-06 | ctrl - P10; ctrl - P11; P2 - ctrl; ctrl - P8; P11 - P10; P2 - P10; P3 - P10; P2 - P11; P3 - P11; P11 - P8; P2 - P3; P2 - P8; P3 - P8 |
| TC0900011306.hg.1 | TC0900011306.hg.1 | fyshor.aAug10-<br>unspliced    | fyshor        | NA      | 26.24 | 4.54<br>E-06 | 5.34<br>32 | 7.50<br>E-06 | ctrl - P10; ctrl - P11; ctrl - P2; P3 - ctrl; ctrl - P8; P10 - P2; P3 - P10; P3 - P11; P3 - P2; P3 - P8                              |
| TC0900006760.hg.1 | TC0900006760.hg.1 | NA                             | NA            | NA      | 26.24 | 4.56<br>E-06 | 5.34<br>11 | 7.53<br>E-06 | ctrl - P10; ctrl - P11; ctrl - P3; ctrl - P8; P11 - P10; P2 - P10; P3 - P10; P2 - P11; P11 - P8; P2 - P3; P2 - P8; P3 - P8           |
| TC1100011845.hg.1 | TC1100011845.hg.1 | jerglerbu.aAug10-<br>unspliced | jerglerbu     | NA      | 26.21 | 4.56<br>E-06 | 5.34<br>09 | 7.53<br>E-06 | ctrl - P10; ctrl - P11; ctrl - P3; ctrl - P8; P2 - P10; P10 - P8; P2 - P11; P11 - P8; P2 - P3; P2 - P8; P3 - P8                      |
| TC1100012019.hg.1 | TC1100012019.hg.1 | NM_001271594                   | SES3          | 143686  | 26.18 | 4.59<br>E-06 | 5.33<br>78 | 7.58<br>E-06 | ctrl - P10; ctrl - P11; ctrl - P8; P11 - P10; P2 - P10; P3 - P10; P3 - P11; P11 - P8; P3 - P2; P2 - P8; P3 - P8                      |
| TC0200009602.hg.1 | TC0200009602.hg.1 | blydeybu.aAug10-<br>unspliced  | blydeybu      | NA      | 26.14 | 4.63<br>E-06 | 5.33<br>44 | 7.63<br>E-06 | ctrl - P10; ctrl - P11; ctrl - P3; ctrl - P8; P11 - P10; P2 - P10; P3 - P10; P10 - P8; P2 - P11; P11 - P8; P2 - P3; P2 - P8; P3 - P8 |
| TC0X00010107.hg.1 | TC0X00010107.hg.1 | NM_001146256                   | ZDHHC15       | 158866  | 26.14 | 4.63<br>E-06 | 5.33<br>43 | 7.63<br>E-06 | ctrl - P10; ctrl - P11; ctrl - P2; ctrl - P8; P11 - P10; P3 - P10; P11 - P2; P3 - P11; P11 - P8; P3 - P2; P3 - P8                    |
| TC0200007097.hg.1 | TC0200007097.hg.1 | ENST00000604052.1              | RP11-373D23.2 |         | 26.11 | 4.66<br>E-06 | 5.33<br>19 | 7.67<br>E-06 | ctrl - P10; ctrl - P11; ctrl - P3; ctrl - P8; P2 - P10; P3 - P10; P2 - P11; P3 - P11; P2 - P3; P2 - P8; P3 - P8                      |

|                   |                   |                                 |               |        |       |              |            |              |                                                                                                                                      |
|-------------------|-------------------|---------------------------------|---------------|--------|-------|--------------|------------|--------------|--------------------------------------------------------------------------------------------------------------------------------------|
| TC0200013759.hg.1 | TC0200013759.hg.1 | ENST00000427050.2               | AC009505.2    | NA     | 26.05 | 4.72<br>E-06 | 5.32<br>6  | 7.77<br>E-06 | P10 - ctrl; P11 - ctrl; P8 - ctrl; P10 - P2; P10 - P3; P11 - P2; P11 - P3; P8 - P2; P8 - P3                                          |
| TC0400012082.hg.1 | TC0400012082.hg.1 | blarbeebo.aAug10-<br>unspliced  | blarbeebo     | NA     | 26.03 | 4.73<br>E-06 | 5.32<br>48 | 7.78<br>E-06 | ctrl - P10; ctrl - P11; ctrl - P3; ctrl - P8; P11 - P10; P2 - P10; P2 - P11; P11 - P3; P11 - P8; P2 - P3; P2 - P8                    |
| TC0400012744.hg.1 | TC0400012744.hg.1 | NA                              | NA            | NA     | 26.00 | 4.77<br>E-06 | 5.32<br>15 | 7.84<br>E-06 | ctrl - P10; ctrl - P11; ctrl - P3; ctrl - P8; P11 - P10; P2 - P10; P3 - P10; P2 - P11; P11 - P8; P2 - P3; P2 - P8; P3 - P8           |
| TC0500011069.hg.1 | TC0500011069.hg.1 | cherstarby.aAug10-<br>unspliced | cherstarby    | NA     | 25.97 | 4.80<br>E-06 | 5.31<br>89 | 7.88<br>E-06 | ctrl - P10; ctrl - P11; ctrl - P3; ctrl - P8; P2 - P10; P10 - P8; P2 - P11; P11 - P8; P2 - P3; P2 - P8; P3 - P8                      |
| TC0800010283.hg.1 | TC0800010283.hg.1 | NA                              | NA            | NA     | 25.85 | 4.92<br>E-06 | 5.30<br>83 | 8.07<br>E-06 | P10 - ctrl; P11 - ctrl; P3 - ctrl; P8 - ctrl; P10 - P11; P10 - P2; P10 - P3; P11 - P2; P11 - P3; P3 - P2; P8 - P2; P8 - P3           |
| TC0300011415.hg.1 | TC0300011415.hg.1 | jeenarbo.aAug10-<br>unspliced   | jeenarbo      | NA     | 25.42 | 5.30<br>E-06 | 8.07<br>79 | 8.07<br>E-06 | ctrl - P10; ctrl - P11; ctrl - P3; ctrl - P8; P11 - P10; P2 - P10; P3 - P10; P2 - P11; P11 - P8; P2 - P3; P2 - P8; P3 - P8           |
| TC0400010788.hg.1 | TC0400010788.hg.1 | huke.aAug10-<br>unspliced       | huke          | NA     | 25.82 | 4.95<br>E-06 | 5.30<br>51 | 8.12<br>E-06 | ctrl - P10; ctrl - P11; ctrl - P8; P2 - P10; P3 - P10; P10 - P8; P2 - P11; P3 - P11; P11 - P8; P2 - P3; P2 - P8; P3 - P8             |
| TC0900008055.hg.1 | TC0900008055.hg.1 | chershee.aAug10-<br>unspliced   | chershee      | NA     | 25.81 | 4.96<br>E-06 | 5.30<br>44 | 8.13<br>E-06 | ctrl - P10; ctrl - P11; P2 - ctrl; ctrl - P3; ctrl - P8; P2 - P10; P2 - P11; P2 - P3; P2 - P8; P3 - P8                               |
| TC0600014308.hg.1 | TC0600014308.hg.1 | NR_029598                       | MIR30C2       | 407032 | 25.79 | 4.98<br>E-06 | 5.30<br>31 | 8.14<br>E-06 | ctrl - P10; ctrl - P11; ctrl - P3; ctrl - P8; P10 - P11; P2 - P10; P10 - P8; P2 - P11; P3 - P11; P2 - P3; P2 - P8; P3 - P8           |
| TC2200007420.hg.1 | TC2200007420.hg.1 | soytey.aAug10-<br>unspliced     | soytey        | NA     | 25.78 | 4.99<br>E-06 | 5.30<br>21 | 8.16<br>E-06 | ctrl - P10; ctrl - P11; ctrl - P3; ctrl - P8; P11 - P10; P2 - P10; P3 - P10; P2 - P11; P11 - P8; P2 - P3; P2 - P8; P3 - P8           |
| TC0X00009094.hg.1 | TC0X00009094.hg.1 | blevyv.bAug10                   | blevyv        |        | 25.77 | 5.00<br>E-06 | 5.30<br>12 | 8.17<br>E-06 | P10 - ctrl; P11 - ctrl; P3 - ctrl; P8 - ctrl; P10 - P11; P10 - P2; P8 - P10; P3 - P11; P8 - P11; P3 - P2; P8 - P2; P8 - P3           |
| TC0200013800.hg.1 | TC0200013800.hg.1 | NA                              | NA            | NA     | 25.74 | 5.03<br>E-06 | 5.29<br>84 | 8.22<br>E-06 | ctrl - P10; ctrl - P2; ctrl - P3; ctrl - P8; P11 - P10; P2 - P10; P3 - P10; P11 - P2; P11 - P3; P11 - P8; P2 - P8; P3 - P8           |
| TC0800010685.hg.1 | TC0800010685.hg.1 | NM_001080416                    | MYBL1         | 4603   | 25.71 | 5.06<br>E-06 | 5.29<br>56 | 8.26<br>E-06 | ctrl - P11; ctrl - P2; P3 - ctrl; P8 - ctrl; P10 - P11; P10 - P2; P3 - P10; P8 - P10; P3 - P11; P8 - P11; P3 - P2; P8 - P2           |
| TC0400008146.hg.1 | TC0400008146.hg.1 | kasnuby.aAug10-<br>unspliced    | kasnuby       | NA     | 25.71 | 5.07<br>E-06 | 5.29<br>51 | 8.26<br>E-06 | ctrl - P10; P11 - ctrl; ctrl - P3; ctrl - P8; P11 - P10; P2 - P10; P11 - P2; P11 - P3; P11 - P8; P2 - P3; P2 - P8                    |
| TC1100009822.hg.1 | TC1100009822.hg.1 | flucher.aAug10-<br>unspliced    | flucher       | NA     | 25.71 | 5.07<br>E-06 | 5.29<br>51 | 8.26<br>E-06 | ctrl - P10; ctrl - P11; ctrl - P3; ctrl - P8; P2 - P10; P2 - P11; P11 - P8; P2 - P3; P2 - P8; P3 - P8                                |
| TC1500008188.hg.1 | TC1500008188.hg.1 | ENST00000559487                 | CTD-2262B20.1 | NA     | 25.70 | 5.07<br>E-06 | 5.29<br>47 | 8.26<br>E-06 | ctrl - P10; ctrl - P11; P2 - ctrl; ctrl - P8; P2 - P10; P3 - P10; P2 - P11; P3 - P11; P2 - P8; P3 - P8                               |
| TC1600011547.hg.1 | TC1600011547.hg.1 | ENST00000563003.1               | RP11-96H17.1  |        | 25.70 | 5.08<br>E-06 | 5.29<br>44 | 8.27<br>E-06 | ctrl - P10; ctrl - P2; ctrl - P3; ctrl - P8; P11 - P10; P2 - P10; P3 - P10; P11 - P2; P11 - P3; P11 - P8; P2 - P3; P2 - P8; P3 - P8  |
| TC0500010772.hg.1 | TC0500010772.hg.1 | blarflar.aAug10-<br>unspliced   | blarflar      | NA     | 25.67 | 5.11<br>E-06 | 5.29<br>18 | 8.31<br>E-06 | ctrl - P10; ctrl - P11; ctrl - P3; ctrl - P8; P11 - P10; P2 - P10; P3 - P10; P2 - P11; P2 - P3; P2 - P8; P3 - P8                     |
| TC0X00011227.hg.1 | TC0X00011227.hg.1 | NR_036049                       | MIR1184-1     | 1E+08  | 25.66 | 5.12<br>E-06 | 5.29<br>07 | 8.32<br>E-06 | P10 - ctrl; P11 - ctrl; P3 - ctrl; P8 - ctrl; P10 - P2; P10 - P3; P11 - P2; P11 - P3; P3 - P2; P8 - P2; P8 - P3                      |
| TC0X00011242.hg.1 | TC0X00011242.hg.1 | ENST00000408263                 | MIR1184-2     | 1E+08  | 25.66 | 5.12<br>E-06 | 5.29<br>07 | 8.32<br>E-06 | P10 - ctrl; P11 - ctrl; P3 - ctrl; P8 - ctrl; P10 - P2; P10 - P3; P11 - P2; P11 - P3; P3 - P2; P8 - P2; P8 - P3                      |
| TC1900008022.hg.1 | TC1900008022.hg.1 | derwu.aAug10-<br>unspliced      | derwu         | NA     | 25.62 | 5.16<br>E-06 | 5.28<br>78 | 8.37<br>E-06 | ctrl - P10; ctrl - P11; ctrl - P3; ctrl - P8; P2 - P10; P3 - P10; P2 - P11; P11 - P8; P2 - P3; P2 - P8; P3 - P8                      |
| TC0X00006659.hg.1 | TC0X00006659.hg.1 | NA                              | NA            | NA     | 25.62 | 5.16<br>E-06 | 5.28<br>7  | 8.38<br>E-06 | ctrl - P10; ctrl - P11; ctrl - P3; ctrl - P8; P11 - P10; P2 - P10; P2 - P11; P2 - P3; P2 - P8                                        |
| TC1200007053.hg.1 | TC1200007053.hg.1 | NM_030572                       | SPX           | 80763  | 25.57 | 5.22<br>E-06 | 5.28<br>25 | 8.46<br>E-06 | ctrl - P10; ctrl - P2; ctrl - P3; ctrl - P8; P11 - P10; P2 - P10; P3 - P10; P8 - P10; P11 - P2; P11 - P3; P11 - P8; P3 - P2; P3 - P8 |
| TC1100011105.hg.1 | TC1100011105.hg.1 | uc058cnz.1                      | RNU6-118P     | NA     | 25.55 | 5.24<br>E-06 | 5.28<br>06 | 8.49<br>E-06 | ctrl - P10; ctrl - P11; ctrl - P3; ctrl - P8; P11 - P10; P2 - P10; P3 - P10; P2 - P11; P11 - P8; P2 - P3; P2 - P8; P3 - P8           |
| TC0700012276.hg.1 | TC0700012276.hg.1 | NM_014705                       | DOCK4         | 9732   | 25.54 | 5.24<br>E-06 | 5.28<br>05 | 8.49<br>E-06 | P10 - ctrl; P3 - ctrl; P8 - ctrl; P10 - P11; P10 - P2; P8 - P10; P3 - P11; P8 - P11; P3 - P2; P8 - P2                                |
| TC1700010258.hg.1 | TC1700010258.hg.1 | tarserbo.aAug10-<br>unspliced   | tarserbo      | NA     | 25.50 | 5.29<br>E-06 | 5.27<br>65 | 8.56<br>E-06 | ctrl - P10; ctrl - P11; P2 - ctrl; ctrl - P8; P11 - P10; P2 - P10; P3 - P10; P2 - P11; P3 - P11; P11 - P8; P2 - P3; P2 - P8; P3 - P8 |
| TC0300013740.hg.1 | TC0300013740.hg.1 | gerstuby.aAug10-<br>unspliced   | gerstuby      | NA     | 25.45 | 5.34<br>E-06 | 5.27<br>23 | 8.64<br>E-06 | ctrl - P10; ctrl - P11; P2 - ctrl; ctrl - P8; P2 - P10; P3 - P10; P2 - P11; P3 - P11; P2 - P3; P2 - P8; P3 - P8                      |
| TC1000011977.hg.1 | TC1000011977.hg.1 | OTTHUMT00000473353              | RP11-427L15.2 |        | 25.44 | 5.36<br>E-06 | 5.27<br>1  | 8.66<br>E-06 | ctrl - P10; ctrl - P11; ctrl - P3; ctrl - P8; P2 - P10; P3 - P10; P10 - P8; P2 - P11; P11 - P8; P2 - P3; P2 - P8; P3 - P8            |
| TC0200015619.hg.1 | TC0200015619.hg.1 | muhamo.aAug10-<br>unspliced     | muhamo        | NA     | 25.41 | 5.40<br>E-06 | 5.26<br>78 | 8.72<br>E-06 | ctrl - P10; ctrl - P3; ctrl - P8; P11 - P10; P2 - P10; P10 - P3; P10 - P8; P11 - P3; P11 - P8; P2 - P3; P2 - P8                      |
| TC0400007496.hg.1 | TC0400007496.hg.1 | snospawby.aAug10-<br>unspliced  | snospawby     | NA     | 25.35 | 5.46<br>E-06 | 5.26<br>29 | 8.81<br>E-06 | ctrl - P10; ctrl - P11; ctrl - P8; P2 - P10; P3 - P10; P2 - P11; P3 - P11; P11 - P8; P2 - P3; P2 - P8; P3 - P8                       |
| TC1300009727.hg.1 | TC1300009727.hg.1 | NA                              | NA            | NA     | 25.29 | 5.53<br>E-06 | 5.25<br>74 | 8.92<br>E-06 | ctrl - P10; ctrl - P11; P2 - ctrl; ctrl - P8; P2 - P10; P3 - P10; P2 - P11; P3 - P11; P11 - P8; P2 - P8; P3 - P8                     |
| TC0300012459.hg.1 | TC0300012459.hg.1 | NA                              | NA            | NA     | 25.29 | 5.53<br>E-06 | 5.25<br>7  | 8.92<br>E-06 | ctrl - P10; ctrl - P2; ctrl - P3; ctrl - P8; P11 - P10; P2 - P10; P3 - P10; P11 - P2; P11 - P3; P11 - P8; P2 - P8; P3 - P8           |
| TC1300009811.hg.1 | TC1300009811.hg.1 | wonoy.aAug10-<br>unspliced      | wonoy         | NA     | 25.28 | 5.54<br>E-06 | 5.25<br>66 | 8.92<br>E-06 | ctrl - P10; ctrl - P11; ctrl - P3; ctrl - P8; P11 - P10; P2 - P10; P2 - P11; P11 - P8; P2 - P3; P2 - P8; P3 - P8                     |
| TC1000010302.hg.1 | TC1000010302.hg.1 | vamo.aAug10-<br>unspliced       | vamo          | NA     | 25.25 | 5.58<br>E-06 | 5.25<br>37 | 8.98<br>E-06 | ctrl - P10; ctrl - P11; ctrl - P8; P2 - P10; P3 - P10; P2 - P11; P3 - P11; P11 - P8; P2 - P3; P2 - P8; P3 - P8                       |

|                     |                   |                                 |              |          |            |              |            |              |                                                                                                                                       |
|---------------------|-------------------|---------------------------------|--------------|----------|------------|--------------|------------|--------------|---------------------------------------------------------------------------------------------------------------------------------------|
| TC0100014661.hg.1   | TC0100014661.hg.1 | snerneebu.aAug10-<br>unspliced  | snerneebu    | NA       | 25.22<br>7 | 5.61<br>E-06 | 5.25<br>09 | 9.03<br>E-06 | ctrl - P10; ctrl - P11; ctrl - P3; ctrl - P8; P11 - P10; P2 - P10; P3 - P10; P2 - P11; P11 - P8; P2 - P3; P2 - P8; P3 - P8            |
| TC0300007201.hg.1   | TC0300007201.hg.1 | ENST00000568686.1               | RP4-555D20.2 |          | 25.21<br>4 | 5.63<br>E-06 | 5.24<br>97 | 9.05<br>E-06 | ctrl - P10; ctrl - P11; ctrl - P2; ctrl - P8; P11 - P10; P2 - P10; P3 - P10; P3 - P11; P3 - P2; P2 - P8; P3 - P8                      |
| TC0800010248.hg.1   | TC0800010248.hg.1 | ENST00000581909.1               | RP11-360L9.8 |          | 25.19<br>7 | 5.65<br>E-06 | 5.24<br>81 | 9.08<br>E-06 | P10 - ctrl; P11 - ctrl; P3 - ctrl; P8 - ctrl; P10 - P11; P10 - P2; P10 - P3; P11 - P2; P8 - P11; P3 - P2; P8 - P2; P8 - P3            |
| HTA2-pos-2985890_st | 23150247          | NA                              | NA           | NA       | 25.15<br>7 | 5.70<br>E-06 | 5.24<br>44 | 9.14<br>E-06 | ctrl - P10; ctrl - P11; P2 - ctrl; ctrl - P3; ctrl - P8; P11 - P10; P2 - P10; P3 - P10; P2 - P11; P11 - P8; P2 - P3; P2 - P8; P3 - P8 |
| TC1000008434.hg.1   | TC1000008434.hg.1 | stawsho.aAug10-<br>unspliced    | stawsho      | NA       | 25.15<br>3 | 5.70<br>E-06 | 5.24<br>41 | 9.14<br>E-06 | ctrl - P10; ctrl - P11; ctrl - P3; ctrl - P8; P2 - P10; P2 - P11; P11 - P8; P2 - P3; P2 - P8; P3 - P8                                 |
| TC0300013070.hg.1   | TC0300013070.hg.1 | flojawbu.aAug10-<br>unspliced   | flojawbu     | NA       | 25.15<br>3 | 5.70<br>E-06 | 5.24<br>41 | 9.14<br>E-06 | ctrl - P10; ctrl - P11; ctrl - P3; ctrl - P8; P11 - P10; P2 - P10; P10 - P8; P2 - P11; P11 - P3; P11 - P8; P2 - P3; P2 - P8; P3 - P8  |
| TC0100014262.hg.1   | TC0100014262.hg.1 | NA                              | NA           | NA       | 25.15<br>3 | 5.70<br>E-06 | 5.24<br>4  | 9.14<br>E-06 | ctrl - P10; ctrl - P11; ctrl - P3; ctrl - P8; P2 - P10; P3 - P10; P10 - P8; P2 - P11; P3 - P11; P11 - P8; P2 - P8; P3 - P8            |
| TC0100011095.hg.1   | TC0100011095.hg.1 | NA                              | NA           | NA       | 25.10<br>3 | 5.76<br>E-06 | 5.23<br>94 | 9.23<br>E-06 | ctrl - P10; ctrl - P11; ctrl - P3; ctrl - P8; P11 - P10; P2 - P10; P2 - P11; P11 - P3; P11 - P8; P2 - P3; P2 - P8                     |
| TC0100018323.hg.1   | TC0100018323.hg.1 | NM_016545                       | IER5         | 51278    | 25.08<br>3 | 5.79<br>E-06 | 5.23<br>75 | 9.26<br>E-06 | P10 - ctrl; P11 - ctrl; P3 - ctrl; P8 - ctrl; P10 - P11; P10 - P2; P8 - P10; P11 - P2; P3 - P11; P8 - P11; P3 - P2; P8 - P2           |
| TC1700010256.hg.1   | TC1700010256.hg.1 | ENST00000582881.1               | RP11-68I3.11 |          | 25.08<br>1 | 5.79<br>E-06 | 5.23<br>74 | 9.26<br>E-06 | ctrl - P10; ctrl - P11; ctrl - P3; ctrl - P8; P11 - P10; P2 - P10; P2 - P11; P11 - P8; P2 - P3; P2 - P8; P3 - P8                      |
| TC1800007506.hg.1   | TC1800007506.hg.1 | NM_001270949                    | TNFRSF11A    | 8792     | 25.05<br>1 | 5.83<br>E-06 | 5.23<br>46 | 9.32<br>E-06 | P10 - ctrl; P3 - ctrl; P8 - ctrl; P10 - P11; P10 - P2; P3 - P11; P8 - P11; P3 - P2; P8 - P2                                           |
| TC0700006585.hg.1   | TC0700006585.hg.1 | ENST00000430569                 | RP11-30B1.1  |          | 25.01<br>8 | 5.87<br>E-06 | 5.23<br>15 | 9.37<br>E-06 | ctrl - P10; ctrl - P11; ctrl - P3; ctrl - P8; P2 - P10; P3 - P10; P2 - P11; P11 - P8; P2 - P3; P2 - P8; P3 - P8                       |
| TC2000007324.hg.1   | TC2000007324.hg.1 | tatey.aAug10-<br>unspliced      | tatey        | NA       | 25.01<br>6 | 5.87<br>E-06 | 5.23<br>13 | 9.37<br>E-06 | ctrl - P10; ctrl - P11; ctrl - P3; ctrl - P8; P2 - P10; P3 - P10; P2 - P11; P11 - P8; P2 - P3; P2 - P8; P3 - P8                       |
| TC1000008926.hg.1   | TC1000008926.hg.1 | NM_016234                       | ACSL5        | 51703    | 24.96<br>7 | 5.93<br>E-06 | 5.22<br>67 | 9.47<br>E-06 | ctrl - P2; P3 - ctrl; P8 - ctrl; P10 - P2; P3 - P10; P8 - P10; P11 - P2; P3 - P11; P8 - P11; P3 - P2; P8 - P2                         |
| TC0400012078.hg.1   | TC0400012078.hg.1 | NM_000901                       | NR3C2        | 4306     | 24.06<br>9 | 6.02<br>E-06 | 5.22<br>05 | 9.60<br>E-06 | ctrl - P10; ctrl - P2; ctrl - P3; ctrl - P8; P11 - P10; P2 - P10; P11 - P2; P11 - P3; P11 - P8; P2 - P3; P2 - P8                      |
| TC0400008055.hg.1   | TC0400008055.hg.1 | fogyg.aAug10-<br>unspliced      | fogyg        | NA       | 24.86<br>1 | 6.07<br>E-06 | 5.21<br>69 | 9.67<br>E-06 | ctrl - P10; ctrl - P11; ctrl - P3; ctrl - P8; P2 - P10; P10 - P8; P2 - P11; P11 - P8; P2 - P3; P2 - P8; P3 - P8                       |
| TC0900007863.hg.1   | TC0900007863.hg.1 | NM_001827                       | CKS2         | 1164     | 24.82<br>5 | 6.12<br>E-06 | 5.21<br>35 | 9.74<br>E-06 | P10 - ctrl; P3 - ctrl; P8 - ctrl; P10 - P11; P10 - P2; P8 - P10; P3 - P11; P8 - P11; P3 - P2; P8 - P2; P8 - P3                        |
| TC0800009287.hg.1   | TC0800009287.hg.1 | fugorby.aAug10-<br>unspliced    | fugorby      | NA       | 24.79<br>8 | 6.15<br>E-06 | 5.21<br>1  | 9.79<br>E-06 | P10 - ctrl; P11 - ctrl; P3 - ctrl; P8 - ctrl; P10 - P2; P10 - P3; P11 - P2; P11 - P3; P3 - P2; P8 - P2; P8 - P3                       |
| TC0900011029.hg.1   | TC0900011029.hg.1 | NM_001127610                    | BAAT         | 570      | 24.78<br>2 | 6.17<br>E-06 | 5.20<br>94 | 9.82<br>E-06 | P10 - ctrl; P8 - ctrl; P10 - P11; P10 - P2; P10 - P3; P10 - P8; P8 - P11; P8 - P2; P8 - P3                                            |
| TC0800008723.hg.1   | TC0800008723.hg.1 | sneyskerbu.aAug10-<br>unspliced | sneyskerbu   | NA       | 24.76<br>1 | 6.20<br>E-06 | 5.20<br>75 | 9.86<br>E-06 | ctrl - P10; ctrl - P11; P2 - ctrl; ctrl - P8; P10 - P11; P2 - P10; P10 - P8; P2 - P11; P3 - P11; P2 - P3; P2 - P8; P3 - P8            |
| TC1600006603.hg.1   | TC1600006603.hg.1 | uc059pkt.1                      | AC009065.4   |          | 24.69<br>3 | 6.29<br>E-06 | 5.20<br>1  | 1.00<br>E-05 | P10 - ctrl; P11 - ctrl; P8 - ctrl; P10 - P2; P10 - P3; P11 - P2; P11 - P3; P8 - P2; P8 - P3                                           |
| TC1100012691.hg.1   | TC1100012691.hg.1 | dorchor.aAug10-<br>unspliced    | dorchor      | NA       | 24.68<br>9 | 6.30<br>E-06 | 5.20<br>07 | 1.00<br>E-05 | ctrl - P10; ctrl - P11; ctrl - P3; ctrl - P8; P2 - P10; P2 - P11; P11 - P8; P2 - P3; P2 - P8                                          |
| TC0500007894.hg.1   | TC0500007894.hg.1 | vystawby.aAug10-<br>unspliced   | vystawby     | NA       | 24.61<br>4 | 6.40<br>E-06 | 5.19<br>36 | 1.02<br>E-05 | ctrl - P10; ctrl - P11; ctrl - P3; ctrl - P8; P2 - P10; P2 - P11; P2 - P3; P2 - P8                                                    |
| TC2000007060.hg.1   | TC2000007060.hg.1 | NA                              | NA           | NA       | 24.58<br>8 | 6.44<br>E-06 | 5.19<br>12 | 1.02<br>E-05 | ctrl - P10; ctrl - P11; ctrl - P3; ctrl - P8; P11 - P10; P2 - P10; P2 - P11; P11 - P8; P2 - P3; P2 - P8                               |
| TC1000008271.hg.1   | TC1000008271.hg.1 | NM_001171971                    | CDHR1        | 92211    | 24.55<br>9 | 6.48<br>E-06 | 5.18<br>84 | 1.03<br>E-05 | ctrl - P11; ctrl - P2; P3 - ctrl; P8 - ctrl; P10 - P11; P3 - P10; P8 - P10; P3 - P11; P8 - P11; P3 - P2; P8 - P2                      |
| TC0100009989.hg.1   | TC0100009989.hg.1 | snoporbo.aAug10-<br>unspliced   | snoporbo     | NA       | 24.48<br>2 | 6.59<br>E-06 | 5.18<br>11 | 1.04<br>E-05 | ctrl - P10; ctrl - P11; ctrl - P8; P2 - P10; P3 - P10; P10 - P8; P2 - P11; P3 - P11; P11 - P8; P2 - P8; P3 - P8                       |
| TC1300006861.hg.1   | TC1300006861.hg.1 | NM_001204197                    | NBEA         | 26960    | 24.44<br>4 | 6.65<br>E-06 | 5.17<br>75 | 1.05<br>E-05 | ctrl - P10; ctrl - P8; P11 - P10; P2 - P10; P3 - P10; P11 - P3; P11 - P8; P2 - P8; P3 - P8                                            |
| TC0700007999.hg.1   | TC0700007999.hg.1 | NR_030321                       | MIR590       | 693175   | 24.41<br>3 | 6.69<br>E-06 | 5.17<br>46 | 1.06<br>E-05 | ctrl - P10; ctrl - P11; ctrl - P3; ctrl - P8; P2 - P10; P3 - P10; P2 - P11; P3 - P11; P2 - P3; P2 - P8; P3 - P8                       |
| TC1200011245.hg.1   | TC1200011245.hg.1 | NM_001109754                    | PTPRB        | 5787     | 24.38<br>9 | 6.73<br>E-06 | 5.17<br>23 | 1.06<br>E-05 | P10 - ctrl; P3 - ctrl; P8 - ctrl; P10 - P11; P10 - P2; P10 - P3; P3 - P11; P8 - P11; P3 - P2; P8 - P2; P8 - P3                        |
| TC1900008024.hg.1   | TC1900008024.hg.1 | kuriru.aAug10-<br>unspliced     | kuriru       | NA       | 24.36<br>3 | 6.76<br>E-06 | 5.16<br>98 | 1.07<br>E-05 | ctrl - P10; ctrl - P11; ctrl - P8; P2 - P10; P3 - P10; P2 - P11; P3 - P11; P2 - P3; P2 - P8; P3 - P8                                  |
| TC0200014908.hg.1   | TC0200014908.hg.1 | slerfeebu.aAug10-<br>unspliced  | slerfeebu    | NA       | 24.36<br>2 | 6.77<br>E-06 | 5.16<br>97 | 1.07<br>E-05 | ctrl - P10; ctrl - P2; ctrl - P3; ctrl - P8; P11 - P10; P2 - P10; P3 - P10; P11 - P3; P11 - P8; P2 - P8; P3 - P8                      |
| TC1300008117.hg.1   | TC1300008117.hg.1 | NR_107042                       | MIR8075      | 1.02E+08 | 24.33<br>4 | 6.81<br>E-06 | 5.16<br>66 | 1.07<br>E-05 | ctrl - P10; ctrl - P11; ctrl - P3; ctrl - P8; P2 - P10; P2 - P11; P2 - P3; P2 - P8                                                    |
| TC0200012092.hg.1   | TC0200012092.hg.1 | NM_001142683                    | CCDC121      | 79635    | 24.31<br>2 | 6.84<br>E-06 | 5.16<br>49 | 1.08<br>E-05 | ctrl - P10; ctrl - P2; ctrl - P3; ctrl - P8; P11 - P10; P10 - P3; P11 - P2; P11 - P3; P11 - P8; P8 - P3                               |



|                   |                   |                                |              |       |       |              |            |              |                                                                                                                                       |
|-------------------|-------------------|--------------------------------|--------------|-------|-------|--------------|------------|--------------|---------------------------------------------------------------------------------------------------------------------------------------|
| TC1400010101.hg.1 | TC1400010101.hg.1 | NA                             | NA           | NA    | 24.31 | 6.84<br>E-06 | 5.16<br>49 | 1.08<br>E-05 | ctrl - P10; ctrl - P11; ctrl - P3; ctrl - P8; P2 - P10; P2 - P11; P11 - P8; P2 - P3; P2 - P8; P3 - P8                                 |
| TC1200007014.hg.1 | TC1200007014.hg.1 | flafy.bAug10-<br>unspliced     | flafy        | NA    | 24.27 | 6.90<br>E-06 | 5.16<br>11 | 1.09<br>E-05 | ctrl - P10; ctrl - P11; P2 - ctrl; ctrl - P8; P2 - P10; P3 - P10; P2 - P11; P3 - P11; P11 - P8; P2 - P3; P2 - P8; P3 - P8             |
| TC1300008946.hg.1 | TC1300008946.hg.1 | gychy.aAug10-<br>unspliced     | gychy        | NA    | 24.27 | 6.90<br>E-06 | 5.16<br>1  | 1.09<br>E-05 | ctrl - P10; P2 - ctrl; ctrl - P3; ctrl - P8; P11 - P10; P2 - P10; P3 - P10; P2 - P11; P11 - P8; P2 - P3; P2 - P8; P3 - P8             |
| TC0700006717.hg.1 | TC0700006717.hg.1 | chorshybu.aAug10-<br>unspliced | chorshybu    | NA    | 24.26 | 6.91<br>E-06 | 5.16<br>04 | 1.09<br>E-05 | ctrl - P10; P2 - ctrl; ctrl - P8; P11 - P10; P2 - P10; P3 - P10; P2 - P11; P11 - P8; P2 - P3; P2 - P8; P3 - P8                        |
| TC1600010292.hg.1 | TC1600010292.hg.1 | wuglu.aAug10-<br>unspliced     | wuglu        | NA    | 24.25 | 6.93<br>E-06 | 5.15<br>92 | 1.09<br>E-05 | ctrl - P10; ctrl - P11; ctrl - P3; ctrl - P8; P11 - P10; P2 - P10; P3 - P10; P11 - P8; P2 - P3; P2 - P8; P3 - P8                      |
| TC0500010199.hg.1 | TC0500010199.hg.1 | NM_001034850                   | FAM134B      | 54463 | 24.23 | 6.96<br>E-06 | 5.15<br>75 | 1.09<br>E-05 | P10 - ctrl; P3 - ctrl; P8 - ctrl; P10 - P11; P10 - P2; P3 - P11; P8 - P11; P3 - P2; P8 - P2                                           |
| TC0800008855.hg.1 | TC0800008855.hg.1 | NR_031610                      | MIR1205      | 1E+08 | 24.21 | 6.99<br>E-06 | 5.15<br>56 | 1.10<br>E-05 | P2 - ctrl; P3 - ctrl; P10 - P11; P2 - P10; P3 - P10; P2 - P11; P3 - P11; P8 - P11; P2 - P3; P2 - P8; P3 - P8                          |
| TC1100009126.hg.1 | TC1100009126.hg.1 | NA                             | NA           | NA    | 24.19 | 7.01<br>E-06 | 5.15<br>42 | 1.10<br>E-05 | P10 - ctrl; P11 - ctrl; P8 - ctrl; P10 - P11; P10 - P2; P10 - P3; P11 - P2; P11 - P3; P8 - P2; P8 - P3                                |
| TC0100007899.hg.1 | TC0100007899.hg.1 | storkloy.aAug10-<br>unspliced  | storkloy     | NA    | 24.19 | 7.02<br>E-06 | 5.15<br>35 | 1.10<br>E-05 | ctrl - P10; ctrl - P11; ctrl - P3; ctrl - P8; P2 - P10; P3 - P10; P2 - P11; P11 - P8; P2 - P3; P2 - P8; P3 - P8                       |
| TC0800011584.hg.1 | TC0800011584.hg.1 | sneela.aAug10-<br>unspliced    | sneela       | NA    | 24.17 | 7.05<br>E-06 | 5.15<br>18 | 1.10<br>E-05 | ctrl - P10; ctrl - P11; ctrl - P8; P10 - P11; P2 - P10; P10 - P8; P2 - P11; P3 - P11; P2 - P3; P2 - P8; P3 - P8                       |
| TC0300006438.hg.1 | TC0300006438.hg.1 | skardubo.aAug10-<br>unspliced  | skardubo     | NA    | 24.12 | 7.13<br>E-06 | 5.14<br>7  | 1.12<br>E-05 | ctrl - P10; ctrl - P11; ctrl - P2; ctrl - P3; ctrl - P8; P11 - P10; P2 - P10; P11 - P3; P11 - P8; P2 - P3; P2 - P8                    |
| TC0100018274.hg.1 | TC0100018274.hg.1 | ENST00000495965                | ATP1A1       | 1p21  | 24.10 | 7.16<br>E-06 | 5.14<br>51 | 1.12<br>E-05 | ctrl - P10; ctrl - P11; ctrl - P2; ctrl - P3; ctrl - P8; P2 - P10; P2 - P11; P2 - P3; P2 - P8                                         |
| TC0300011261.hg.1 | TC0300011261.hg.1 | farnabo.aAug10-<br>unspliced   | farnabo      | NA    | 24.05 | 7.25<br>E-06 | 5.13<br>98 | 1.13<br>E-05 | ctrl - P10; ctrl - P11; P2 - ctrl; ctrl - P3; ctrl - P8; P11 - P10; P2 - P10; P10 - P8; P2 - P11; P11 - P8; P2 - P3; P2 - P8; P3 - P8 |
| TC0200006676.hg.1 | TC0200006676.hg.1 | ENST00000607140.1              | RP11-254F7.4 |       | 23.99 | 7.34<br>E-06 | 5.13<br>46 | 1.15<br>E-05 | ctrl - P10; ctrl - P11; ctrl - P2; ctrl - P3; ctrl - P8; P11 - P10; P2 - P10; P11 - P3; P11 - P8; P2 - P3; P2 - P8                    |
| TC0100009385.hg.1 | TC0100009385.hg.1 | ENST00000609909.1              | RP5-1074L1.4 |       | 23.97 | 7.37<br>E-06 | 5.13<br>28 | 1.15<br>E-05 | ctrl - P10; ctrl - P11; ctrl - P3; ctrl - P8; P2 - P10; P10 - P8; P2 - P11; P11 - P8; P2 - P3; P2 - P8; P3 - P8                       |
| TC2000009130.hg.1 | TC2000009130.hg.1 | ENST00000606979                | RP3-511B24.5 | NA    | 23.96 | 7.38<br>E-06 | 5.13<br>19 | 1.15<br>E-05 | ctrl - P10; ctrl - P11; P2 - ctrl; ctrl - P8; P2 - P10; P3 - P10; P2 - P11; P3 - P11; P2 - P3; P2 - P8; P3 - P8                       |
| TC1900007432.hg.1 | TC1900007432.hg.1 | seypey.aAug10-<br>unspliced    | seypey       | NA    | 23.96 | 7.39<br>E-06 | 5.13<br>14 | 1.15<br>E-05 | ctrl - P10; ctrl - P11; ctrl - P3; ctrl - P8; P2 - P10; P2 - P11; P2 - P3; P2 - P8                                                    |
| TC1900008134.hg.1 | TC1900008134.hg.1 | NM_000767                      | CYP2B6       | 1555  | 23.92 | 7.45<br>E-06 | 5.12<br>77 | 1.16<br>E-05 | ctrl - P10; P11 - ctrl; ctrl - P2; ctrl - P3; ctrl - P8; P11 - P10; P11 - P2; P11 - P3; P11 - P8                                      |
| TC1100007301.hg.1 | TC1100007301.hg.1 | NM_001160167                   | PRR5L        | 79899 | 23.90 | 7.49<br>E-06 | 5.12<br>56 | 1.17<br>E-05 | P10 - ctrl; ctrl - P11; ctrl - P2; P8 - ctrl; P10 - P11; P10 - P2; P11 - P2; P3 - P11; P8 - P11; P3 - P2; P8 - P2; P8 - P3            |
| TC1800008894.hg.1 | TC1800008894.hg.1 | NA                             | NA           | NA    | 23.7  | 7.49<br>E-06 | 5.12<br>52 | 1.17<br>E-05 | ctrl - P10; ctrl - P11; ctrl - P3; ctrl - P8; P2 - P10; P10 - P8; P2 - P11; P11 - P8; P2 - P3; P2 - P8                                |
| TC0400008106.hg.1 | TC0400008106.hg.1 | NM_016323                      | HERC5        | 51191 | 23.89 | 7.50<br>E-06 | 5.12<br>52 | 1.17<br>E-05 | P10 - ctrl; P3 - ctrl; P8 - ctrl; P10 - P11; P10 - P2; P3 - P11; P8 - P11; P3 - P2; P8 - P2; P8 - P3                                  |
| TC0300009773.hg.1 | TC0300009773.hg.1 | NM_001308077                   | FETUB        | 26998 | 23.86 | 7.55<br>E-06 | 5.12<br>22 | 1.17<br>E-05 | P10 - ctrl; P3 - ctrl; P8 - ctrl; P10 - P11; P10 - P2; P3 - P10; P8 - P10; P3 - P11; P8 - P11; P3 - P2; P8 - P2                       |
| TC0100008525.hg.1 | TC0100008525.hg.1 | snawperbu.aAug10-<br>unspliced | snawperbu    | NA    | 23.85 | 7.57<br>E-06 | 5.12<br>07 | 1.18<br>E-05 | ctrl - P10; ctrl - P3; ctrl - P8; P11 - P10; P2 - P10; P3 - P10; P11 - P8; P2 - P8; P3 - P8                                           |
| TC0X00010957.hg.1 | TC0X00010957.hg.1 | someru.aAug10-<br>unspliced    | someru       | NA    | 23.80 | 7.66<br>E-06 | 5.11<br>59 | 1.19<br>E-05 | ctrl - P10; ctrl - P2; ctrl - P3; ctrl - P8; P11 - P10; P2 - P10; P11 - P3; P11 - P8; P2 - P3; P2 - P8                                |
| TC0700009727.hg.1 | TC0700009727.hg.1 | worko.aAug10-<br>unspliced     | worko        | NA    | 23.78 | 7.70<br>E-06 | 5.11<br>37 | 1.19<br>E-05 | ctrl - P10; ctrl - P11; P2 - ctrl; ctrl - P3; ctrl - P8; P2 - P10; P2 - P11; P2 - P3; P2 - P8; P3 - P8                                |
| TC0200008634.hg.1 | TC0200008634.hg.1 | typobo.aAug10-<br>unspliced    | typobo       | NA    | 23.71 | 7.81<br>E-06 | 5.10<br>75 | 1.21<br>E-05 | ctrl - P10; ctrl - P11; ctrl - P3; ctrl - P8; P11 - P10; P2 - P10; P3 - P10; P11 - P3; P11 - P8; P2 - P3; P2 - P8                     |
| TC0600011464.hg.1 | TC0600011464.hg.1 | ENST00000229729                | SLC44A4      | 80736 | 23.67 | 7.89<br>E-06 | 5.10<br>3  | 1.22<br>E-05 | P10 - ctrl; P11 - ctrl; P8 - ctrl; P10 - P11; P10 - P2; P10 - P3; P11 - P2; P11 - P3; P8 - P11; P8 - P2; P8 - P3                      |
| TC1200007616.hg.1 | TC1200007616.hg.1 | chawjorby.aAug10-<br>unspliced | chawjorby    | NA    | 23.61 | 7.98<br>E-06 | 5.09<br>78 | 1.24<br>E-05 | ctrl - P10; ctrl - P11; ctrl - P3; ctrl - P8; P2 - P10; P10 - P8; P2 - P11; P2 - P3; P2 - P8; P3 - P8                                 |
| TC1500007337.hg.1 | TC1500007337.hg.1 | skaspee.aAug10-<br>unspliced   | skaspee      | NA    | 23.60 | 8.01<br>E-06 | 5.09<br>63 | 1.24<br>E-05 | ctrl - P10; ctrl - P11; ctrl - P3; ctrl - P8; P2 - P10; P2 - P11; P2 - P3; P2 - P8; P3 - P8                                           |
| TC1200012601.hg.1 | TC1200012601.hg.1 | NM_019844                      | SLCO1B3      | 28234 | 23.54 | 8.11<br>E-06 | 5.09<br>1  | 1.25<br>E-05 | P10 - ctrl; P3 - ctrl; P8 - ctrl; P10 - P11; P10 - P2; P3 - P10; P8 - P10; P3 - P11; P8 - P11; P3 - P2; P8 - P2                       |
| TC0200007416.hg.1 | TC0200007416.hg.1 | reefa.aAug10-<br>unspliced     | reefa        | NA    | 23.51 | 8.17<br>E-06 | 5.08<br>78 | 1.26<br>E-05 | ctrl - P10; ctrl - P11; ctrl - P3; ctrl - P8; P2 - P10; P10 - P8; P2 - P11; P11 - P8; P2 - P3; P2 - P8; P3 - P8                       |
| TC0400010244.hg.1 | TC0400010244.hg.1 | pogu.aAug10-<br>unspliced      | pogu         | NA    | 23.51 | 8.18<br>E-06 | 5.08<br>74 | 1.26<br>E-05 | ctrl - P10; ctrl - P11; ctrl - P3; ctrl - P8; P11 - P10; P2 - P10; P10 - P8; P11 - P3; P11 - P8; P2 - P3; P2 - P8                     |
| TC0600006801.hg.1 | TC0600006801.hg.1 | NA                             | NA           | NA    | 23.46 | 8.27<br>E-06 | 5.08<br>23 | 1.28<br>E-05 | ctrl - P10; ctrl - P11; P2 - ctrl; ctrl - P3; ctrl - P8; P2 - P10; P2 - P11; P3 - P11; P2 - P3; P2 - P8; P3 - P8                      |

|                           |                   |                                |               |          |         |          |        |          |                                                                                                                            |
|---------------------------|-------------------|--------------------------------|---------------|----------|---------|----------|--------|----------|----------------------------------------------------------------------------------------------------------------------------|
| TC0600009216.hg.1         | TC0600009216.hg.1 | NA                             | NA            | NA       | 23.417  | 8.36E-06 | 5.078  | 1.29E-05 | P10 - ctrl; P3 - ctrl; P8 - ctrl; P10 - P11; P10 - P2; P8 - P10; P3 - P11; P8 - P11; P3 - P2; P8 - P2; P8 - P3             |
| TC0X00009515.hg.1         | TC0X00009515.hg.1 | ENST00000602277.1              | RP6-99M1.3    |          | 23.397  | 8.39E-06 | 5.0761 | 1.29E-05 | ctrl - P10; ctrl - P11; ctrl - P8; P2 - P10; P3 - P10; P2 - P11; P3 - P11; P2 - P8; P3 - P8                                |
| TC0800006883.hg.1         | TC0800006883.hg.1 | swarslobu.aAug10-<br>unspliced | swarslobu     | NA       | 23.393  | 8.40E-06 | 5.0757 | 1.30E-05 | ctrl - P10; ctrl - P11; P2 - ctrl; ctrl - P3; ctrl - P8; P2 - P10; P10 - P8; P2 - P11; P2 - P3; P2 - P8                    |
| TC1400007389.hg.1         | TC1400007389.hg.1 | rerzer.aAug10-<br>unspliced    | rerzer        | NA       | 23.372  | 8.44E-06 | 5.0735 | 1.30E-05 | ctrl - P11; ctrl - P8; P10 - P11; P2 - P10; P3 - P10; P10 - P8; P2 - P11; P3 - P11; P2 - P8; P3 - P8                       |
| TC0700007389.hg.1         | TC0700007389.hg.1 | blusheybu.aAug10-<br>unspliced | blusheybu     | NA       | 23.368  | 8.45E-06 | 5.0732 | 1.30E-05 | P10 - ctrl; P11 - ctrl; P3 - ctrl; P8 - ctrl; P10 - P2; P10 - P3; P11 - P2; P11 - P3; P3 - P2; P8 - P2; P8 - P3            |
| TC1100008272.hg.1         | TC1100008272.hg.1 | loysha.aAug10-<br>unspliced    | loysha        | NA       | 23.304  | 8.57E-06 | 5.0668 | 1.32E-05 | ctrl - P10; ctrl - P11; ctrl - P3; ctrl - P8; P2 - P10; P3 - P10; P2 - P11; P2 - P3; P2 - P8; P3 - P8                      |
| TC1300009928.hg.1         | TC1300009928.hg.1 | NA                             | NA            | NA       | 23.295  | 8.59E-06 | 5.0659 | 1.32E-05 | ctrl - P10; ctrl - P11; ctrl - P8; P2 - P10; P3 - P10; P2 - P11; P3 - P11; P2 - P8; P3 - P8                                |
| TC0200008535.hg.1         | TC0200008535.hg.1 | smeekybo.aAug10-<br>unspliced  | smeekybo      | NA       | 23.284  | 8.61E-06 | 5.0648 | 1.32E-05 | ctrl - P10; ctrl - P11; ctrl - P3; ctrl - P8; P11 - P10; P2 - P10; P3 - P10; P2 - P11; P11 - P8; P2 - P3; P2 - P8; P3 - P8 |
| TC0300007058.hg.1         | TC0300007058.hg.1 | lorfarbo.aAug10-<br>unspliced  | lorfarbo      | NA       | 23.247  | 8.69E-06 | 5.0612 | 1.33E-05 | ctrl - P10; ctrl - P11; ctrl - P3; ctrl - P8; P11 - P10; P2 - P10; P3 - P10; P2 - P11; P11 - P8; P2 - P3; P2 - P8; P3 - P8 |
| TC0500010498.hg.1         | TC0500010498.hg.1 | NM_001161429                   | RANBP3L       | 202151   | 23.2319 | 8.80E-06 | 5.0555 | 1.35E-05 | ctrl - P10; ctrl - P11; ctrl - P2; ctrl - P3; ctrl - P8; P11 - P10; P11 - P2; P11 - P3; P11 - P8                           |
| TC0500012392.hg.1         | TC0500012392.hg.1 | NM_003122                      | SPINK1        | 6690     | 23.187  | 8.81E-06 | 5.0552 | 1.35E-05 | P10 - ctrl; P2 - ctrl; P8 - ctrl; P10 - P11; P10 - P2; P10 - P3; P2 - P11; P3 - P11; P8 - P11; P8 - P2; P8 - P3            |
| TC1100009297.hg.1         | TC1100009297.hg.1 | rorkarby.aAug10-<br>unspliced  | rorkarby      | NA       | 23.2318 | 8.82E-06 | 5.0545 | 1.35E-05 | ctrl - P10; ctrl - P11; ctrl - P3; ctrl - P8; P2 - P10; P10 - P8; P2 - P11; P11 - P8; P2 - P3; P2 - P8; P3 - P8            |
| TC0800007675.hg.1         | TC0800007675.hg.1 | munumu.bAug10-<br>unspliced    | munumu        | NA       | 23.2314 | 8.90E-06 | 5.0506 | 1.36E-05 | ctrl - P10; P2 - ctrl; P3 - ctrl; ctrl - P8; P2 - P10; P3 - P10; P2 - P11; P3 - P11; P2 - P3; P2 - P8; P3 - P8             |
| TC0400008326.hg.1         | TC0400008326.hg.1 | NR_046840                      | ARHGEF38-IT1  | 1.01E+08 | 23.138  | 8.91E-06 | 5.0503 | 1.36E-05 | ctrl - P10; ctrl - P11; ctrl - P3; ctrl - P8; P2 - P10; P10 - P8; P2 - P11; P11 - P8; P2 - P3; P2 - P8                     |
| TC1700007479.hg.1         | TC1700007479.hg.1 | ENST00000584382.1              | RP11-142O6.1  |          | 23.109  | 8.96E-06 | 5.0475 | 1.37E-05 | ctrl - P10; ctrl - P11; ctrl - P3; ctrl - P8; P2 - P10; P2 - P11; P2 - P3; P2 - P8                                         |
| TC0900010894.hg.1         | TC0900010894.hg.1 | plartawby.aAug10-<br>unspliced | plartawby     | NA       | 23.087  | 9.01E-06 | 5.0452 | 1.38E-05 | ctrl - P10; P2 - ctrl; ctrl - P3; ctrl - P8; P11 - P10; P2 - P10; P2 - P11; P11 - P3; P11 - P8; P2 - P3; P2 - P8           |
| TC0Y00007303.hg.1         | TC0Y00007303.hg.1 | sharbo.aAug10-<br>unspliced    | sharbo        | NA       | 23.049  | 9.09E-06 | 5.0414 | 1.39E-05 | ctrl - P10; ctrl - P11; ctrl - P2; ctrl - P3; ctrl - P8; P11 - P10; P3 - P10; P11 - P2; P3 - P2; P8 - P2; P3 - P8          |
| TC0Y00007308.hg.1         | TC0Y00007308.hg.1 | blerbo.aAug10-<br>unspliced    | blerbo        | NA       | 23.049  | 9.09E-06 | 5.0414 | 1.39E-05 | ctrl - P10; ctrl - P11; ctrl - P2; ctrl - P3; ctrl - P8; P11 - P10; P3 - P10; P11 - P2; P3 - P2; P8 - P2; P3 - P8          |
| HTA2-pos-PSR02023992.hg.1 | 23151081          | NA                             | NA            | NA       | 23.039  | 9.11E-06 | 5.0404 | 1.39E-05 | ctrl - P10; ctrl - P11; ctrl - P3; ctrl - P8; P11 - P10; P2 - P10; P3 - P10; P2 - P11; P2 - P3; P2 - P8; P3 - P8           |
| TC1200011362.hg.1         | TC1200011362.hg.1 | NA                             | NA            | NA       | 23.035  | 9.12E-06 | 5.0405 | 1.39E-05 | ctrl - P11; P2 - ctrl; ctrl - P8; P10 - P11; P2 - P10; P3 - P10; P10 - P8; P2 - P11; P3 - P11; P2 - P3; P2 - P8; P3 - P8   |
| TC0900006759.hg.1         | TC0900006759.hg.1 | NA                             | NA            | NA       | 22.954  | 9.29E-06 | 5.0319 | 1.42E-05 | ctrl - P10; ctrl - P11; ctrl - P3; ctrl - P8; P2 - P10; P10 - P8; P2 - P11; P11 - P8; P2 - P3; P2 - P8; P3 - P8            |
| TC1400008185.hg.1         | TC1400008185.hg.1 | bleezey.aAug10-<br>unspliced   | bleezey       | NA       | 22.862  | 9.49E-06 | 5.0227 | 1.45E-05 | ctrl - P10; ctrl - P11; P2 - ctrl; ctrl - P3; ctrl - P8; P2 - P10; P2 - P11; P2 - P3; P2 - P8                              |
| TC1600009426.hg.1         | TC1600009426.hg.1 | slyrar.aAug10-<br>unspliced    | slyrar        | NA       | 22.858  | 9.50E-06 | 5.0222 | 1.45E-05 | ctrl - P10; ctrl - P11; ctrl - P3; ctrl - P8; P11 - P10; P2 - P10; P2 - P11; P11 - P3; P11 - P8; P2 - P3; P2 - P8          |
| TC0200013602.hg.1         | TC0200013602.hg.1 | NM_025244                      | TSGA10        | 80705    | 22.818  | 9.61E-06 | 5.0174 | 1.46E-05 | ctrl - P10; ctrl - P3; ctrl - P8; P11 - P10; P2 - P10; P11 - P3; P11 - P8; P2 - P3; P2 - P8                                |
| TC0700007045.hg.1         | TC0700007045.hg.1 | NANOGP4.aAug10-<br>unspliced   | NANOGP4       | NA       | 22.807  | 9.61E-06 | 5.0171 | 1.46E-05 | ctrl - P10; ctrl - P11; ctrl - P8; P11 - P10; P2 - P10; P3 - P10; P2 - P11; P11 - P8; P2 - P3; P2 - P8; P3 - P8            |
| TC1200012176.hg.1         | TC1200012176.hg.1 | ENST00000535720.1              | RP11-173P15.3 |          | 22.801  | 9.63E-06 | 5.0165 | 1.46E-05 | P10 - ctrl; P11 - ctrl; P3 - ctrl; P8 - ctrl; P10 - P2; P11 - P2; P3 - P2; P8 - P2                                         |
| TC0200014742.hg.1         | TC0200014742.hg.1 | wawly.aAug10-<br>unspliced     | wawly         | NA       | 22.793  | 9.65E-06 | 5.0156 | 1.47E-05 | ctrl - P10; ctrl - P11; ctrl - P3; ctrl - P8; P11 - P10; P2 - P10; P3 - P10; P2 - P11; P11 - P8; P2 - P3; P2 - P8; P3 - P8 |
| TC0200010537.hg.1         | TC0200010537.hg.1 | spykeybo.aAug10-<br>unspliced  | spykeybo      | NA       | 22.776  | 9.68E-06 | 5.0139 | 1.47E-05 | ctrl - P10; P2 - ctrl; ctrl - P8; P11 - P10; P2 - P10; P3 - P10; P10 - P8; P11 - P8; P2 - P3; P2 - P8; P3 - P8             |
| TC1100007695.hg.1         | TC1100007695.hg.1 | kise.aAug10-<br>unspliced      | kise          | NA       | 22.762  | 9.72E-06 | 5.0126 | 1.47E-05 | ctrl - P10; ctrl - P11; P2 - ctrl; ctrl - P8; P2 - P10; P3 - P10; P2 - P11; P3 - P11; P11 - P8; P2 - P3; P2 - P8; P3 - P8  |
| TC0X00009072.hg.1         | TC0X00009072.hg.1 | NA                             | NA            | NA       | 22.755  | 9.73E-06 | 5.0118 | 1.48E-05 | ctrl - P10; ctrl - P11; ctrl - P3; ctrl - P8; P11 - P10; P2 - P10; P3 - P10; P2 - P11; P11 - P8; P2 - P3; P2 - P8; P3 - P8 |
| TC1100009290.hg.1         | TC1100009290.hg.1 | blymey.aAug10-<br>unspliced    | blymey        | NA       | 22.744  | 9.76E-06 | 5.0107 | 1.48E-05 | ctrl - P10; ctrl - P11; ctrl - P3; ctrl - P8; P2 - P10; P3 - P10; P10 - P8; P2 - P11; P11 - P8; P2 - P3; P2 - P8; P3 - P8  |
| HTA2-pos-PSR02023982.hg.1 | 23151075          | NA                             | NA            | NA       | 22.733  | 9.78E-06 | 5.0096 | 1.48E-05 | ctrl - P10; ctrl - P11; ctrl - P8; P11 - P10; P2 - P10; P3 - P10; P2 - P11; P11 - P8; P2 - P3; P2 - P8; P3 - P8            |
| TC0X00008336.hg.1         | TC0X00008336.hg.1 | spybu.aAug10-<br>unspliced     | spybu         | NA       | 22.718  | 9.82E-06 | 5.0081 | 1.49E-05 | ctrl - P10; ctrl - P11; ctrl - P3; ctrl - P8; P2 - P10; P3 - P10; P2 - P11; P3 - P11; P2 - P3; P2 - P8                     |

|                   |                   |                                 |                |       |       |      |      |      |                                                                                                                             |
|-------------------|-------------------|---------------------------------|----------------|-------|-------|------|------|------|-----------------------------------------------------------------------------------------------------------------------------|
| TC1900009095.hg.1 | TC1900009095.hg.1 | NA                              | NA             | NA    | 22.69 | 9.86 | 5.00 | 1.49 | P10 - ctrl; P11 - ctrl; ctrl - P2; P3 - ctrl; P8 - ctrl; P10 - P2; P10 - P3; P11 - P2; P11 - P3; P3 - P2; P8 - P2           |
| TC0300011950.hg.1 | TC0300011950.hg.1 | NM_005459                       | GUCA1C         | 9626  | 22.68 | 9.89 | 5.00 | 1.50 | ctrl - P11; ctrl - P2; ctrl - P3; ctrl - P8; P10 - P11; P10 - P2; P10 - P3; P8 - P11; P8 - P2; P8 - P3                      |
| TC0200009955.hg.1 | TC0200009955.hg.1 | NM_001127383                    | CYBRD1         | 79901 | 22.67 | 9.92 | 5.00 | 1.50 | ctrl - P10; ctrl - P11; ctrl - P2; P3 - ctrl; P10 - P2; P3 - P10; P3 - P11; P8 - P11; P3 - P2; P8 - P2; P3 - P8             |
| TC0900007622.hg.1 | TC0900007622.hg.1 | shyplorbu.aAug10-<br>unspliced  | shyplorbu      | NA    | 22.65 | 9.96 | 5.00 | 1.50 | ctrl - P10; ctrl - P11; P2 - ctrl; ctrl - P3; ctrl - P8; P2 - P10; P10 - P8; P2 - P11; P11 - P8; P2 - P3; P2 - P8; P3 - P8  |
| TC1900008727.hg.1 | TC1900008727.hg.1 | NM_001191055                    | ERVV-2         | 1E+08 | 22.65 | 9.97 | 5.00 | 1.50 | P10 - ctrl; P11 - ctrl; P3 - ctrl; P8 - ctrl; P10 - P2; P3 - P10; P8 - P10; P11 - P2; P3 - P11; P8 - P11; P3 - P2; P8 - P2  |
| TC1300008769.hg.1 | TC1300008769.hg.1 | dorchaw.aAug10-<br>unspliced    | dorchaw        | NA    | 22.65 | 9.97 | 5.00 | 1.50 | ctrl - P10; ctrl - P8; P11 - P10; P2 - P10; P3 - P10; P11 - P3; P11 - P8; P2 - P3; P2 - P8; P3 - P8                         |
| TC0100007444.hg.1 | TC0100007444.hg.1 | NM_001297647                    | CNKSRI         | 10256 | 22.64 | 9.98 | 5.00 | 1.50 | ctrl - P10; P11 - ctrl; ctrl - P2; ctrl - P8; P11 - P10; P3 - P10; P11 - P2; P11 - P3; P11 - P8; P3 - P2; P3 - P8           |
| TC0100017979.hg.1 | TC0100017979.hg.1 | NA                              | NA             | NA    | 22.64 | 9.99 | 5.00 | 1.51 | ctrl - P10; ctrl - P11; P2 - ctrl; ctrl - P8; P2 - P10; P3 - P10; P2 - P11; P3 - P11; P2 - P3; P2 - P8; P3 - P8             |
| TC1500007322.hg.1 | TC1500007322.hg.1 | OTTHUMT00000473<br>983          | RP11-48G14.3   |       | 22.62 | 1.00 | 4.99 | 1.51 | ctrl - P10; ctrl - P11; ctrl - P3; ctrl - P8; P11 - P10; P2 - P10; P2 - P11; P11 - P8; P2 - P3; P2 - P8                     |
| TC0900009418.hg.1 | TC0900009418.hg.1 | flupawbu.aAug10-<br>unspliced   | flupawbu       | NA    | 22.61 | 1.01 | 4.99 | 1.51 | ctrl - P10; ctrl - P11; ctrl - P3; ctrl - P8; P2 - P10; P2 - P11; P11 - P3; P11 - P8; P2 - P3; P2 - P8                      |
| TC0600007039.hg.1 | TC0600007039.hg.1 | larfleyby.aAug10-<br>unspliced  | larfleyby      | NA    | 22.60 | 1.01 | 4.99 | 1.52 | ctrl - P10; ctrl - P11; ctrl - P3; ctrl - P8; P2 - P10; P2 - P11; P2 - P3; P2 - P8                                          |
| TC1600010318.hg.1 | TC1600010318.hg.1 | koysno.aAug10-<br>unspliced     | koysno         | NA    | 22.60 | 1.01 | 4.99 | 1.52 | ctrl - P10; ctrl - P11; P2 - ctrl; ctrl - P3; ctrl - P8; P2 - P10; P3 - P10; P2 - P11; P3 - P11; P2 - P3; P2 - P8; P3 - P8  |
| TC0200012285.hg.1 | TC0200012285.hg.1 | NA                              | NA             | NA    | 22.59 | 1.01 | 4.99 | 1.52 | P10 - ctrl; P11 - ctrl; P3 - ctrl; P8 - ctrl; P10 - P2; P10 - P3; P11 - P2; P11 - P3; P3 - P2; P8 - P2                      |
| TC0100006504.hg.1 | TC0100006504.hg.1 | NA                              | NA             | NA    | 22.59 | 1.01 | 4.99 | 1.52 | P10 - ctrl; P11 - ctrl; P8 - ctrl; P10 - P11; P10 - P2; P10 - P3; P10 - P8; P11 - P2; P11 - P3; P3 - P2; P8 - P2; P8 - P3   |
| TC0X00008087.hg.1 | TC0X00008087.hg.1 | koho.aAug10-<br>unspliced       | koho           | NA    | 22.59 | 1.01 | 4.99 | 1.52 | ctrl - P10; ctrl - P11; ctrl - P8; P11 - P10; P2 - P10; P3 - P10; P2 - P11; P11 - P8; P2 - P3; P2 - P8; P3 - P8             |
| TC0400011169.hg.1 | TC0400011169.hg.1 | zeeko.aAug10-<br>unspliced      | zeeko          | NA    | 22.57 | 1.01 | 4.99 | 1.52 | ctrl - P10; ctrl - P11; ctrl - P3; ctrl - P8; P11 - P10; P2 - P10; P2 - P11; P11 - P8; P2 - P3; P2 - P8                     |
| TC0300006567.hg.1 | TC0300006567.hg.1 | ENST00000602411.1               | RP11-1020A11.1 |       | 22.57 | 1.02 | 4.99 | 1.52 | ctrl - P10; ctrl - P11; ctrl - P3; ctrl - P8; P11 - P10; P2 - P10; P2 - P11; P11 - P8; P2 - P3; P2 - P8; P3 - P8            |
| TC0100018058.hg.1 | TC0100018058.hg.1 | lorleebo.aAug10-<br>unspliced   | lorleebo       | NA    | 22.55 | 1.02 | 4.99 | 1.53 | ctrl - P10; ctrl - P11; ctrl - P8; P2 - P10; P3 - P10; P2 - P11; P11 - P8; P2 - P3; P2 - P8; P3 - P8                        |
| TC0400011645.hg.1 | TC0400011645.hg.1 | mygla.aAug10-<br>unspliced      | mygla          | NA    | 22.53 | 1.02 | 4.98 | 1.53 | ctrl - P10; ctrl - P11; ctrl - P3; ctrl - P8; P2 - P10; P3 - P10; P2 - P11; P3 - P11; P2 - P8; P3 - P8                      |
| TC1800007189.hg.1 | TC1800007189.hg.1 | peywo.aAug10-<br>unspliced      | peywo          | NA    | 22.53 | 1.03 | 4.98 | 1.53 | ctrl - P10; ctrl - P11; ctrl - P3; ctrl - P8; P11 - P10; P2 - P10; P3 - P10; P2 - P11; P11 - P8; P2 - P3; P2 - P8; P3 - P8  |
| TC0400012081.hg.1 | TC0400012081.hg.1 | gasnoyby.aAug10-<br>unspliced   | gasnoyby       | NA    | 22.51 | 1.03 | 4.98 | 1.54 | ctrl - P10; ctrl - P3; ctrl - P8; P11 - P10; P2 - P10; P11 - P3; P11 - P8; P2 - P3; P2 - P8; P3 - P8                        |
| TC0700010560.hg.1 | TC0700010560.hg.1 | shawky.aAug10-<br>unspliced     | shawky         | NA    | 22.51 | 1.03 | 4.98 | 1.54 | ctrl - P10; ctrl - P11; ctrl - P3; ctrl - P8; P11 - P10; P2 - P10; P2 - P11; P11 - P3; P11 - P8; P2 - P3; P2 - P8           |
| TC1100007512.hg.1 | TC1100007512.hg.1 | flawfloybu.aAug10-<br>unspliced | flawfloybu     | NA    | 22.48 | 1.04 | 4.98 | 1.55 | ctrl - P10; ctrl - P11; ctrl - P8; P10 - P11; P3 - P10; P10 - P8; P2 - P11; P3 - P11; P2 - P8; P3 - P8                      |
| TC0800011415.hg.1 | TC0800011415.hg.1 | ENST00000474907                 | RP112P24       | NA    | 22.47 | 1.04 | 4.98 | 1.55 | ctrl - P10; ctrl - P11; P2 - ctrl; ctrl - P3; ctrl - P8; P2 - P10; P10 - P8; P2 - P11; P11 - P3; P11 - P8; P2 - P3; P2 - P8 |
| TC0Y00007287.hg.1 | TC0Y00007287.hg.1 | zobo.aAug10-<br>unspliced       | zobo           | NA    | 22.47 | 1.04 | 4.98 | 1.55 | ctrl - P10; ctrl - P11; ctrl - P2; ctrl - P8; P11 - P10; P3 - P10; P8 - P10; P11 - P2; P3 - P11; P3 - P2; P3 - P8           |
| TC0Y00007299.hg.1 | TC0Y00007299.hg.1 | skeybo.aAug10-<br>unspliced     | skeybo         | NA    | 22.47 | 1.04 | 4.98 | 1.55 | ctrl - P10; ctrl - P11; ctrl - P2; ctrl - P8; P11 - P10; P3 - P10; P8 - P10; P11 - P2; P3 - P11; P3 - P2; P3 - P8           |
| TC0200014696.hg.1 | TC0200014696.hg.1 | ENST00000447019.1               | AC019186.1     |       | 22.46 | 1.04 | 4.98 | 1.55 | ctrl - P10; ctrl - P3; ctrl - P8; P11 - P10; P2 - P10; P11 - P3; P11 - P8; P2 - P3; P2 - P8; P3 - P8                        |
| TC1400007531.hg.1 | TC1400007531.hg.1 | NA                              | NA             | NA    | 22.44 | 1.05 | 4.97 | 1.56 | P10 - ctrl; P11 - ctrl; P3 - ctrl; P8 - ctrl; P10 - P2; P10 - P3; P11 - P2; P11 - P3; P3 - P2; P8 - P2                      |
| TC0500010858.hg.1 | TC0500010858.hg.1 | uc063dvx.1                      | RNU6-806P      | NA    | 22.41 | 1.05 | 4.97 | 1.57 | P2 - ctrl; P3 - ctrl; P2 - P10; P3 - P10; P2 - P11; P3 - P11; P3 - P2; P2 - P8; P3 - P8                                     |
| TC0400008064.hg.1 | TC0400008064.hg.1 | posnyby.aAug10-<br>unspliced    | posnyby        | NA    | 22.37 | 1.06 | 4.97 | 1.58 | ctrl - P10; ctrl - P11; P2 - ctrl; ctrl - P3; ctrl - P8; P2 - P10; P10 - P8; P2 - P11; P11 - P8; P2 - P3; P2 - P8; P3 - P8  |
| TC0700012155.hg.1 | TC0700012155.hg.1 | shasmorbu.aAug10-<br>unspliced  | shasmorbu      | NA    | 22.34 | 1.07 | 4.97 | 1.59 | ctrl - P10; ctrl - P11; ctrl - P3; ctrl - P8; P10 - P11; P2 - P10; P10 - P8; P2 - P11; P3 - P11; P2 - P3; P2 - P8; P3 - P8  |
| TC1200008132.hg.1 | TC1200008132.hg.1 | ENST00000548895                 | C1GALT1P1      | NA    | 22.30 | 1.08 | 4.96 | 1.61 | ctrl - P10; ctrl - P11; P2 - ctrl; ctrl - P3; ctrl - P8; P2 - P10; P2 - P11; P11 - P8; P2 - P3; P2 - P8                     |
| TC0100010325.hg.1 | TC0100010325.hg.1 | rarlee.aAug10                   | rarlee         |       | 22.29 | 1.09 | 4.96 | 1.61 | P10 - ctrl; P11 - ctrl; P8 - ctrl; P10 - P11; P10 - P2; P10 - P3; P11 - P2; P8 - P11; P8 - P2; P8 - P3                      |

|                           |                   |                                 |                |          |                |              |            |              |                                                                                                                            |
|---------------------------|-------------------|---------------------------------|----------------|----------|----------------|--------------|------------|--------------|----------------------------------------------------------------------------------------------------------------------------|
| TC0100012762.hg.1         | TC0100012762.hg.1 | slernobu.aAug10-<br>unspliced   | slernobu       | NA       | 22.<br>27<br>6 | 1.09<br>E-05 | 4.96<br>28 | 1.62<br>E-05 | ctrl - P10; ctrl - P11; ctrl - P3; ctrl - P8; P11 - P10; P2 - P10; P2 - P11; P11 - P3; P11 - P8; P2 - P3; P2 - P8          |
| TC1000011332.hg.1         | TC1000011332.hg.1 | chawdabu.aAug10-<br>unspliced   | chawdabu       | NA       | 22.<br>27<br>4 | 1.09<br>E-05 | 4.96<br>26 | 1.62<br>E-05 | ctrl - P10; ctrl - P11; ctrl - P3; ctrl - P8; P11 - P10; P2 - P10; P3 - P10; P2 - P11; P11 - P8; P2 - P3; P2 - P8; P3 - P8 |
| TC0500007165.hg.1         | TC0500007165.hg.1 | flufilaw.aAug10-<br>unspliced   | flufilaw       | NA       | 22.<br>24      | 1.10<br>E-05 | 4.95<br>91 | 1.63<br>E-05 | ctrl - P10; ctrl - P11; ctrl - P3; ctrl - P8; P2 - P10; P2 - P11; P2 - P3; P2 - P8                                         |
| TC0800011055.hg.1         | TC0800011055.hg.1 | slarzeeby.bAug10-<br>unspliced  | slarzeeby      | NA       | 22.<br>23<br>1 | 1.10<br>E-05 | 4.95<br>82 | 1.63<br>E-05 | ctrl - P11; P2 - ctrl; ctrl - P8; P10 - P11; P2 - P10; P10 - P8; P2 - P11; P3 - P11; P2 - P3; P2 - P8; P3 - P8             |
| TC0500010463.hg.1         | TC0500010463.hg.1 | glorplarby.aAug10-<br>unspliced | glorplarby     | NA       | 22.<br>23      | 1.10<br>E-05 | 4.95<br>81 | 1.63<br>E-05 | ctrl - P10; ctrl - P11; ctrl - P3; ctrl - P8; P2 - P10; P3 - P10; P2 - P11; P11 - P8; P2 - P3; P2 - P8; P3 - P8            |
| TC1000008032.hg.1         | TC1000008032.hg.1 | NR_132103                       | PPP3CB-AS1     | 1.02E+08 | 22.<br>16<br>8 | 1.12<br>E-05 | 4.95<br>17 | 1.65<br>E-05 | ctrl - P10; ctrl - P2; ctrl - P3; ctrl - P8; P11 - P10; P2 - P10; P11 - P2; P11 - P3; P11 - P8; P2 - P3; P2 - P8; P3 - P3  |
| TC1200007269.hg.1         | TC1200007269.hg.1 | torblobo.aAug10-<br>unspliced   | torblobo       | NA       | 22.<br>15      | 1.12<br>E-05 | 4.94<br>98 | 1.66<br>E-05 | ctrl - P10; ctrl - P11; P2 - ctrl; ctrl - P3; ctrl - P8; P2 - P10; P10 - P8; P2 - P11; P2 - P3; P2 - P8; P3 - P8           |
| TC0100012772.hg.1         | TC0100012772.hg.1 | ENST00000410579                 | Y RNA          |          | 22.<br>14<br>7 | 1.12<br>E-05 | 4.94<br>95 | 1.66<br>E-05 | ctrl - P10; ctrl - P11; ctrl - P3; ctrl - P8; P2 - P10; P10 - P8; P2 - P11; P2 - P3; P2 - P8                               |
| TC1800006603.hg.1         | TC1800006603.hg.1 | kitaru.aAug10-<br>unspliced     | kitaru         | NA       | 22.<br>13<br>7 | 1.13<br>E-05 | 4.94<br>84 | 1.66<br>E-05 | ctrl - P10; ctrl - P11; ctrl - P3; ctrl - P8; P2 - P10; P3 - P10; P2 - P11; P2 - P3; P2 - P8; P3 - P8                      |
| TC1900009933.hg.1         | TC1900009933.hg.1 | C19orf42.sAug10-<br>unspliced   | C19orf42       | NA       | 22.<br>12<br>6 | 1.13<br>E-05 | 4.94<br>73 | 1.67<br>E-05 | ctrl - P10; ctrl - P11; ctrl - P3; ctrl - P8; P2 - P10; P2 - P11; P11 - P8; P2 - P3; P2 - P8; P3 - P8                      |
| TC0800011816.hg.1         | TC0800011816.hg.1 | ENST00000363205                 | SNORA25        | NA       | 22.<br>10<br>7 | 1.13<br>E-05 | 4.94<br>53 | 1.67<br>E-05 | ctrl - P10; ctrl - P11; ctrl - P3; ctrl - P8; P2 - P10; P3 - P10; P10 - P8; P2 - P11; P11 - P8; P2 - P3; P2 - P8; P3 - P8  |
| TC0100009671.hg.1         | TC0100009671.hg.1 | NA                              | NA             | NA       | 22.<br>07<br>4 | 1.14<br>E-05 | 4.94<br>19 | 1.68<br>E-05 | ctrl - P10; ctrl - P11; ctrl - P3; ctrl - P8; P2 - P10; P3 - P10; P2 - P11; P3 - P11; P2 - P3; P2 - P8; P3 - P8            |
| TC0400007802.hg.1         | TC0400007802.hg.1 | nokime.bAug10-<br>unspliced     | nokime         | NA       | 22.<br>05<br>3 | 1.15<br>E-05 | 4.93<br>98 | 1.69<br>E-05 | ctrl - P10; ctrl - P3; ctrl - P8; P11 - P10; P2 - P10; P11 - P3; P11 - P8; P2 - P3; P2 - P8                                |
| TC0300008339.hg.1         | TC0300008339.hg.1 | ENST00000563632.1               | RP11-757F18.5  |          | 22.<br>04<br>9 | 1.15<br>E-05 | 4.93<br>93 | 1.69<br>E-05 | ctrl - P10; ctrl - P11; P2 - ctrl; ctrl - P8; P2 - P10; P3 - P10; P2 - P11; P3 - P11; P2 - P3; P2 - P8; P3 - P8            |
| TC2200006890.hg.1         | TC2200006890.hg.1 | joyfer.aAug10-<br>unspliced     | joyfer         | NA       | 21.<br>93<br>8 | 1.18<br>E-05 | 4.92<br>77 | 1.74<br>E-05 | ctrl - P10; ctrl - P11; ctrl - P3; ctrl - P8; P11 - P10; P2 - P10; P2 - P11; P11 - P8; P2 - P3; P2 - P8; P3 - P8           |
| TC0100014981.hg.1         | TC0100014981.hg.1 | vumeebo.aAug10-<br>unspliced    | vumeebo        | NA       | 21.<br>93<br>5 | 1.18<br>E-05 | 4.92<br>74 | 1.74<br>E-05 | ctrl - P10; ctrl - P11; ctrl - P3; ctrl - P8; P2 - P10; P3 - P10; P2 - P11; P3 - P11; P2 - P3; P2 - P8                     |
| TC1600010847.hg.1         | TC1600010847.hg.1 | ENST00000493458                 | AC009120.3     | NA       | 21.<br>89<br>7 | 1.19<br>E-05 | 4.92<br>34 | 1.75<br>E-05 | ctrl - P10; ctrl - P11; ctrl - P3; ctrl - P8; P11 - P10; P2 - P10; P2 - P11; P11 - P8; P2 - P3; P2 - P8; P3 - P8           |
| TC0500011060.hg.1         | TC0500011060.hg.1 | deysmaby.aAug10-<br>unspliced   | deysmaby       | NA       | 21.<br>89<br>4 | 1.19<br>E-05 | 4.92<br>31 | 1.75<br>E-05 | ctrl - P10; ctrl - P3; ctrl - P8; P11 - P10; P2 - P10; P3 - P10; P2 - P11; P11 - P8; P2 - P3; P2 - P8; P3 - P8             |
| TC0100018440.hg.1         | TC0100018440.hg.1 | NM_001048166                    | STIL           | 1p32     | 21.<br>88<br>5 | 1.20<br>E-05 | 4.92<br>22 | 1.76<br>E-05 | P10 - ctrl; ctrl - P11; ctrl - P2; P8 - ctrl; P10 - P11; P10 - P2; P10 - P3; P3 - P11; P8 - P11; P3 - P2; P8 - P2; P8 - P3 |
| TC0200011963.hg.1         | TC0200011963.hg.1 | NA                              | NA             | NA       | 21.<br>87<br>3 | 1.20<br>E-05 | 4.92<br>09 | 1.76<br>E-05 | ctrl - P10; ctrl - P8; P11 - P10; P2 - P10; P3 - P10; P11 - P8; P2 - P8; P3 - P8                                           |
| TC0600009964.hg.1         | TC0600009964.hg.1 | vostaby.aAug10-<br>unspliced    | vostaby        | NA       | 21.<br>87<br>2 | 1.20<br>E-05 | 4.92<br>08 | 1.76<br>E-05 | ctrl - P10; ctrl - P11; ctrl - P8; P2 - P10; P3 - P10; P10 - P8; P2 - P11; P3 - P11; P11 - P8; P2 - P3; P2 - P8; P3 - P8   |
| TC1600009946.hg.1         | TC1600009946.hg.1 | ENST00000567795.1               | CTD-2574D22.4  |          | 21.<br>84<br>9 | 1.21<br>E-05 | 4.91<br>84 | 1.77<br>E-05 | ctrl - P10; ctrl - P11; ctrl - P3; ctrl - P8; P2 - P10; P2 - P11; P11 - P8; P2 - P3; P2 - P8                               |
| TC0200010483.hg.1         | TC0200010483.hg.1 | NR_003031                       | SNORD11        | 2q33.1   | 21.<br>84<br>6 | 1.21<br>E-05 | 4.91<br>81 | 1.77<br>E-05 | ctrl - P10; ctrl - P3; ctrl - P8; P11 - P10; P2 - P10; P11 - P3; P11 - P8; P2 - P3; P2 - P8                                |
| TC1500009584.hg.1         | TC1500009584.hg.1 | NA                              | NA             | NA       | 21.<br>82<br>7 | 1.21<br>E-05 | 4.91<br>61 | 1.77<br>E-05 | ctrl - P10; ctrl - P11; ctrl - P3; ctrl - P8; P2 - P10; P3 - P10; P2 - P11; P11 - P8; P2 - P3; P2 - P8; P3 - P8            |
| TC0100013501.hg.1         | TC0100013501.hg.1 | puklor.aAug10-<br>unspliced     | puklor         | NA       | 21.<br>78<br>9 | 1.22<br>E-05 | 4.91<br>21 | 1.79<br>E-05 | ctrl - P10; ctrl - P11; ctrl - P3; ctrl - P8; P2 - P10; P3 - P10; P2 - P11; P3 - P11; P2 - P3; P2 - P8; P3 - P8            |
| TC1200010743.hg.1         | TC1200010743.hg.1 | uc058ogg.1                      | AC021066.1     | NA       | 21.<br>74<br>9 | 1.24<br>E-05 | 4.90<br>79 | 1.81<br>E-05 | P10 - ctrl; P11 - ctrl; P3 - ctrl; P8 - ctrl; P10 - P11; P10 - P2; P10 - P3; P11 - P2; P8 - P11; P3 - P2; P8 - P2; P8 - P3 |
| TC0200008799.hg.1         | TC0200008799.hg.1 | NR_037191                       | SULT1C2P1      | 151234   | 21.<br>74<br>8 | 1.24<br>E-05 | 4.90<br>78 | 1.81<br>E-05 | ctrl - P10; P11 - ctrl; ctrl - P3; ctrl - P8; P11 - P10; P2 - P10; P11 - P2; P11 - P3; P11 - P8; P2 - P3; P2 - P8; P3 - P8 |
| HTA2-pos-PSR02023984.hg.1 | 23151077          | NA                              | NA             | NA       | 21.<br>73<br>1 | 1.24<br>E-05 | 4.90<br>6  | 1.81<br>E-05 | ctrl - P10; ctrl - P11; ctrl - P3; ctrl - P8; P11 - P10; P2 - P10; P3 - P10; P2 - P11; P11 - P8; P2 - P3; P2 - P8; P3 - P8 |
| HTA2-pos-3022516 st       | 23150290          | NA                              | NA             | NA       | 21.<br>70<br>6 | 1.25<br>E-05 | 4.90<br>34 | 1.82<br>E-05 | ctrl - P10; ctrl - P11; ctrl - P3; ctrl - P8; P11 - P10; P2 - P10; P3 - P10; P2 - P11; P11 - P8; P2 - P3; P2 - P8; P3 - P8 |
| TC1600009740.hg.1         | TC1600009740.hg.1 | blozu.aAug10-<br>unspliced      | blozu          | NA       | 21.<br>69<br>2 | 1.25<br>E-05 | 4.90<br>19 | 1.83<br>E-05 | ctrl - P10; ctrl - P11; ctrl - P3; ctrl - P8; P11 - P10; P2 - P10; P11 - P3; P11 - P8; P2 - P3; P2 - P8                    |
| TC0100017984.hg.1         | TC0100017984.hg.1 | NM_001206729                    | AKT3           | 10000    | 21.<br>68<br>1 | 1.26<br>E-05 | 4.90<br>07 | 1.83<br>E-05 | ctrl - P10; ctrl - P11; ctrl - P2; ctrl - P8; P11 - P10; P2 - P10; P3 - P10; P11 - P8; P2 - P8; P3 - P8                    |
| TC0700009054.hg.1         | TC0700009054.hg.1 | ENST00000605836.1               | RP11-274B21.10 |          | 21.<br>66<br>6 | 1.26<br>E-05 | 4.89<br>92 | 1.84<br>E-05 | ctrl - P10; ctrl - P11; ctrl - P3; ctrl - P8; P2 - P10; P3 - P10; P2 - P11; P11 - P8; P2 - P3; P2 - P8; P3 - P8            |
| TC1300008939.hg.1         | TC1300008939.hg.1 | pleyspor.aAug10-<br>unspliced   | pleyspor       | NA       | 21.<br>65<br>7 | 1.26<br>E-05 | 4.89<br>81 | 1.84<br>E-05 | ctrl - P10; ctrl - P11; ctrl - P3; ctrl - P8; P11 - P10; P2 - P10; P3 - P10; P2 - P11; P11 - P8; P2 - P3; P2 - P8; P3 - P8 |

|                   |                   |                               |               |          |                |              |              |              |                                                                                                                                     |
|-------------------|-------------------|-------------------------------|---------------|----------|----------------|--------------|--------------|--------------|-------------------------------------------------------------------------------------------------------------------------------------|
| TC0200007019.hg.1 | TC0200007019.hg.1 | swargloy.aAug10-<br>unspliced | swargloy      | NA       | 21.<br>63<br>4 | 1.27<br>E-05 | 4.89<br>57   | 1.85<br>E-05 | ctrl - P10; ctrl - P11; ctrl - P3; ctrl - P8; P2 - P10; P2 - P11; P2 - P3; P2 - P8; P3 - P8                                         |
| TC0800006873.hg.1 | TC0800006873.hg.1 | NM_006207                     | PDGFRL        | 5157     | 21.<br>61<br>5 | 1.28<br>E-05 | 4.89<br>37   | 1.86<br>E-05 | P10 - ctrl; P11 - ctrl; P3 - ctrl; P8 - ctrl; P10 - P11; P10 - P2; P3 - P11; P8 - P11; P3 - P2; P8 - P2; P8 - P3                    |
| TC0200011189.hg.1 | TC0200011189.hg.1 | NR_131900                     | AGAP1-IT1     | 1.01E+08 | 21.<br>61<br>2 | 1.28<br>E-05 | 4.89<br>34   | 1.86<br>E-05 | ctrl - P10; ctrl - P11; ctrl - P3; ctrl - P8; P11 - P10; P2 - P10; P3 - P10; P11 - P8; P2 - P3; P2 - P8; P3 - P8                    |
| TC1400009300.hg.1 | TC1400009300.hg.1 | mozer.aAug10-<br>unspliced    | mozer         | NA       | 21.<br>58<br>2 | 1.29<br>E-05 | 4.89<br>03   | 1.87<br>E-05 | ctrl - P10; ctrl - P11; ctrl - P2; ctrl - P3; ctrl - P8; P11 - P10; P2 - P10; P3 - P10; P11 - P8; P2 - P8; P3 - P8                  |
| TC1300008089.hg.1 | TC1300008089.hg.1 | skawzoby.aAug10-<br>unspliced | skawzoby      | NA       | 21.<br>49<br>9 | 1.31<br>E-05 | 4.88<br>14   | 1.91<br>E-05 | ctrl - P10; ctrl - P11; ctrl - P3; ctrl - P8; P2 - P10; P10 - P8; P2 - P11; P11 - P8; P2 - P3; P2 - P8                              |
| TC1500008867.hg.1 | TC1500008867.hg.1 | plergler.aAug10-<br>unspliced | plergler      | NA       | 21.<br>49<br>8 | 1.31<br>E-05 | 4.88<br>13   | 1.91<br>E-05 | ctrl - P10; ctrl - P11; ctrl - P3; ctrl - P8; P11 - P10; P2 - P10; P3 - P10; P2 - P11; P11 - P8; P2 - P3; P2 - P8; P3 - P8          |
| TC1100011078.hg.1 | TC1100011078.hg.1 | ENST00000526045.1             | CTD-2531D15.5 |          | 21.<br>49<br>4 | 1.32<br>E-05 | 4.88<br>08   | 1.91<br>E-05 | P10 - ctrl; P11 - ctrl; P3 - ctrl; P8 - ctrl; P10 - P11; P10 - P2; P10 - P3; P11 - P2; P8 - P11; P3 - P2; P8 - P2; P8 - P3          |
| TC0100011098.hg.1 | TC0100011098.hg.1 | zakorbo.aAug10-<br>unspliced  | zakorbo       | NA       | 21.<br>49<br>3 | 1.32<br>E-05 | 4.88<br>08   | 1.91<br>E-05 | ctrl - P10; P2 - ctrl; ctrl - P8; P11 - P10; P2 - P10; P3 - P10; P2 - P11; P11 - P8; P2 - P3; P2 - P8; P3 - P8                      |
| TC1200007011.hg.1 | TC1200007011.hg.1 | ENST00000501211.2             | RP11-282K24.3 |          | 21.<br>44<br>9 | 1.33<br>E-05 | 4.87<br>61   | 1.93<br>E-05 | ctrl - P10; ctrl - P11; ctrl - P3; ctrl - P8; P2 - P10; P2 - P11; P11 - P8; P2 - P3; P2 - P8; P3 - P8                               |
| TC0800011716.hg.1 | TC0800011716.hg.1 | kuhire.aAug10-<br>unspliced   | kuhire        | NA       | 21.<br>44<br>7 | 1.33<br>E-05 | 4.87<br>58   | 1.93<br>E-05 | ctrl - P10; ctrl - P11; ctrl - P8; P2 - P10; P3 - P10; P2 - P11; P3 - P11; P2 - P3; P2 - P8; P3 - P8                                |
| TC1500006575.hg.1 | TC1500006575.hg.1 | snychybu.aAug10-<br>unspliced | snychybu      | NA       | 21.<br>42<br>9 | 1.34<br>E-05 | 4.87<br>4    | 1.93<br>E-05 | ctrl - P10; ctrl - P11; ctrl - P3; ctrl - P8; P2 - P10; P2 - P11; P11 - P8; P2 - P3; P2 - P8; P3 - P8                               |
| TC0300007057.hg.1 | TC0300007057.hg.1 | kofarbo.aAug10-<br>unspliced  | kofarbo       | NA       | 21.<br>39<br>6 | 1.35<br>E-05 | 4.87<br>04   | 1.95<br>E-05 | ctrl - P10; P2 - ctrl; ctrl - P3; ctrl - P8; P11 - P10; P2 - P10; P3 - P10; P2 - P11; P11 - P8; P2 - P3; P2 - P8; P3 - P8           |
| TC0100016940.hg.1 | TC0100016940.hg.1 | NA                            | NA            | NA       | 21.<br>33<br>3 | 1.37<br>E-05 | 4.86<br>37   | 1.98<br>E-05 | P10 - ctrl; P11 - ctrl; P8 - ctrl; P10 - P2; P10 - P3; P11 - P2; P11 - P3; P8 - P2; P8 - P3                                         |
| TC0500012156.hg.1 | TC0500012156.hg.1 | chargor.aAug10-<br>unspliced  | chargor       | NA       | 21.<br>33<br>3 | 1.37<br>E-05 | 4.86<br>37   | 1.98<br>E-05 | ctrl - P10; ctrl - P11; P2 - ctrl; ctrl - P8; P11 - P10; P2 - P10; P3 - P10; P2 - P11; P11 - P8; P2 - P3; P2 - P8; P3 - P8          |
| TC0100009145.hg.1 | TC0100009145.hg.1 | swoplo.aAug10-<br>unspliced   | swoplo        | NA       | 21.<br>30<br>7 | 1.38<br>E-05 | 4.86<br>09   | 1.99<br>E-05 | ctrl - P10; ctrl - P11; ctrl - P3; ctrl - P8; P2 - P10; P2 - P11; P2 - P3; P2 - P8; P3 - P8                                         |
| TC1900008400.hg.1 | TC1900008400.hg.1 | ENST00000624074               | CTD-2233K9.1  |          | 21.<br>28<br>8 | 1.38<br>E-05 | 4.85<br>88   | 2.00<br>E-05 | ctrl - P10; ctrl - P11; ctrl - P3; ctrl - P8; P2 - P10; P2 - P11; P2 - P3; P2 - P8                                                  |
| TC0100012279.hg.1 | TC0100012279.hg.1 | NA                            | NA            | NA       | 21.<br>27<br>4 | 1.39<br>E-05 | 4.85<br>73   | 2.00<br>E-05 | ctrl - P10; ctrl - P11; ctrl - P3; ctrl - P8; P2 - P10; P3 - P10; P2 - P11; P2 - P3; P2 - P8; P3 - P8                               |
| TC1400009712.hg.1 | TC1400009712.hg.1 | gawsmr.aAug10-<br>unspliced   | gawsmr        | NA       | 21.<br>26<br>2 | 1.39<br>E-05 | 4.85<br>58   | 2.01<br>E-05 | ctrl - P10; ctrl - P11; ctrl - P3; ctrl - P8; P2 - P10; P2 - P11; P11 - P8; P2 - P3; P2 - P8                                        |
| TC0200016551.hg.1 | TC0200016551.hg.1 | ENST00000604340.1             | RP11-546J1.1  |          | 21.<br>22<br>1 | 1.41<br>E-05 | 4.85<br>17   | 2.03<br>E-05 | ctrl - P10; ctrl - P11; ctrl - P3; ctrl - P8; P11 - P10; P2 - P10; P3 - P10; P2 - P11; P11 - P8; P2 - P3; P2 - P8; P3 - P8          |
| TC1300008116.hg.1 | TC1300008116.hg.1 | uc058ymp.1                    | AL136221.3    | NA       | 21.<br>16<br>4 | 1.43<br>E-05 | 4.84<br>55   | 2.05<br>E-05 | ctrl - P10; ctrl - P11; ctrl - P3; ctrl - P8; P2 - P10; P2 - P11; P2 - P3; P2 - P8                                                  |
| TC1500008842.hg.1 | TC1500008842.hg.1 | ENST00000560740.1             | RP11-680F8.4  |          | 21.<br>14<br>5 | 1.43<br>E-05 | 4.84<br>34   | 2.06<br>E-05 | ctrl - P10; ctrl - P11; ctrl - P3; ctrl - P8; P2 - P10; P2 - P11; P11 - P8; P2 - P3; P2 - P8; P3 - P8                               |
| TC0100007304.hg.1 | TC0100007304.hg.1 | zyklor.aAug10-<br>unspliced   | zyklor        | NA       | 21.<br>12<br>9 | 1.44<br>E-05 | 4.84<br>17   | 2.07<br>E-05 | ctrl - P10; ctrl - P11; ctrl - P3; ctrl - P8; P2 - P10; P2 - P11; P11 - P8; P2 - P3; P2 - P8; P3 - P8                               |
| TC0600010129.hg.1 | TC0600010129.hg.1 | NA                            | NA            | NA       | 21.<br>12<br>6 | 1.44<br>E-05 | 4.84<br>14   | 2.07<br>E-05 | ctrl - P10; ctrl - P11; ctrl - P3; ctrl - P8; P11 - P10; P2 - P10; P2 - P11; P11 - P8; P2 - P3; P2 - P8; P3 - P8                    |
| TC1200011312.hg.1 | TC1200011312.hg.1 | lerchar.aAug10-<br>unspliced  | lerchar       | NA       | 21.<br>11<br>3 | 1.45<br>E-05 | 4.84<br>E-05 | 2.07<br>E-05 | ctrl - P10; ctrl - P11; ctrl - P3; ctrl - P8; P2 - P10; P3 - P10; P2 - P11; P11 - P8; P2 - P3; P2 - P8; P3 - P8                     |
| TC1000010783.hg.1 | TC1000010783.hg.1 | dylor.aAug10-<br>unspliced    | dylor         | NA       | 21.<br>10<br>1 | 1.45<br>E-05 | 4.83<br>86   | 2.08<br>E-05 | ctrl - P10; ctrl - P11; P2 - ctrl; ctrl - P8; P2 - P10; P3 - P10; P10 - P8; P2 - P11; P3 - P11; P11 - P8; P2 - P3; P2 - P8; P3 - P8 |
| TC0500011049.hg.1 | TC0500011049.hg.1 | ENST00000194097               | NAIP          | 4671     | 21.<br>08<br>4 | 1.46<br>E-05 | 4.83<br>69   | 2.09<br>E-05 | ctrl - P10; ctrl - P11; ctrl - P3; ctrl - P8; P11 - P10; P2 - P10; P3 - P10; P2 - P11; P11 - P8; P2 - P3; P2 - P8                   |
| TC0900008012.hg.1 | TC0900008012.hg.1 | borlar.aAug10-<br>unspliced   | borlar        | NA       | 21.<br>07<br>4 | 1.46<br>E-05 | 4.83<br>58   | 2.09<br>E-05 | ctrl - P10; P2 - ctrl; ctrl - P3; ctrl - P8; P11 - P10; P2 - P10; P2 - P11; P11 - P3; P11 - P8; P2 - P3; P2 - P8                    |
| TC1400008627.hg.1 | TC1400008627.hg.1 | pleepy.aAug10-<br>unspliced   | pleepy        | NA       | 21.<br>06<br>9 | 1.46<br>E-05 | 4.83<br>52   | 2.09<br>E-05 | ctrl - P10; ctrl - P11; P2 - ctrl; ctrl - P3; ctrl - P8; P2 - P10; P3 - P10; P2 - P11; P11 - P8; P2 - P3; P2 - P8; P3 - P8          |
| TC0400010558.hg.1 | TC0400010558.hg.1 | NM_001105529                  | ATP8A1        | 10396    | 21.<br>04<br>8 | 1.47<br>E-05 | 4.83<br>29   | 2.10<br>E-05 | ctrl - P10; ctrl - P3; ctrl - P8; P11 - P10; P2 - P10; P3 - P10; P10 - P8; P11 - P3; P11 - P8; P2 - P3; P2 - P8; P3 - P8            |
| TC0300008341.hg.1 | TC0300008341.hg.1 | neebubu.aAug10-<br>unspliced  | neebubu       | NA       | 21.<br>02<br>3 | 1.48<br>E-05 | 4.83<br>03   | 2.11<br>E-05 | ctrl - P10; ctrl - P11; ctrl - P3; ctrl - P8; P2 - P10; P3 - P10; P2 - P11; P3 - P11; P2 - P3; P2 - P8; P3 - P8                     |
| TC0100010520.hg.1 | TC0100010520.hg.1 | feekloy.aAug10-<br>unspliced  | feekloy       | NA       | 21.<br>01<br>6 | 1.48<br>E-05 | 4.82<br>95   | 2.12<br>E-05 | ctrl - P10; ctrl - P11; ctrl - P3; ctrl - P8; P2 - P10; P3 - P10; P2 - P11; P11 - P8; P2 - P3; P2 - P8; P3 - P8                     |
| TC2000009441.hg.1 | TC2000009441.hg.1 | smeera.aAug10-<br>unspliced   | smeera        | NA       | 21.<br>00<br>8 | 1.48<br>E-05 | 4.82<br>85   | 2.12<br>E-05 | ctrl - P10; ctrl - P3; ctrl - P8; P2 - P10; P10 - P8; P2 - P11; P11 - P3; P11 - P8; P2 - P3; P2 - P8                                |
| TC0100006841.hg.1 | TC0100006841.hg.1 | forreybo.aAug10-<br>unspliced | forreybo      | NA       | 20.<br>93<br>8 | 1.51<br>E-05 | 4.82<br>1    | 2.16<br>E-05 | ctrl - P10; ctrl - P11; ctrl - P3; ctrl - P8; P11 - P10; P2 - P10; P3 - P10; P11 - P8; P2 - P3; P2 - P8; P3 - P8                    |

|                         |                         |                                |                |          |       |              |            |              |                                                                                                                            |
|-------------------------|-------------------------|--------------------------------|----------------|----------|-------|--------------|------------|--------------|----------------------------------------------------------------------------------------------------------------------------|
| TC1800008731.hg.1       | TC1800008731.hg.1       | parploy.aAug10-<br>unspliced   | parploy        | NA       | 20.91 | 1.52<br>E-05 | 4.81<br>89 | 2.17<br>E-05 | ctrl - P10; ctrl - P11; ctrl - P3; ctrl - P8; P2 - P10; P10 - P8; P2 - P11; P3 - P11; P2 - P3; P2 - P8; P3 - P8            |
| TC2100007117.hg.1       | TC2100007117.hg.1       | NA                             | NA             | NA       | 20.89 | 1.53<br>E-05 | 4.81<br>64 | 2.18<br>E-05 | ctrl - P10; ctrl - P11; ctrl - P8; P2 - P10; P3 - P10; P10 - P8; P2 - P11; P3 - P11; P2 - P8; P3 - P8                      |
| TC0300008325.hg.1       | TC0300008325.hg.1       | dububu.aAug10-<br>unspliced    | dububu         | NA       | 20.80 | 1.56<br>E-05 | 4.80<br>62 | 2.23<br>E-05 | ctrl - P10; ctrl - P3; ctrl - P8; P11 - P10; P2 - P10; P3 - P10; P2 - P11; P11 - P8; P2 - P3; P2 - P8; P3 - P8             |
| TSUnmapped00000135.hg.1 | TSUnmapped00000135.hg.1 | ENST00000627169                | INPP5D         | 3635     | 20.77 | 1.57<br>E-05 | 4.80<br>33 | 2.24<br>E-05 | P3 - ctrl; P8 - ctrl; P10 - P2; P3 - P10; P8 - P10; P11 - P2; P3 - P11; P8 - P11; P3 - P2; P8 - P2                         |
| TC1600007983.hg.1       | TC1600007983.hg.1       | ENST00000565861.1              | RP11-325K4.3   |          | 20.77 | 1.57<br>E-05 | 4.80<br>32 | 2.24<br>E-05 | ctrl - P10; ctrl - P11; ctrl - P3; ctrl - P8; P2 - P10; P2 - P11; P2 - P3; P2 - P8                                         |
| TC1600007172.hg.1       | TC1600007172.hg.1       | uc059rvx.1                     | RNU6-196P      | NA       | 20.76 | 1.58<br>E-05 | 4.80<br>16 | 2.25<br>E-05 | ctrl - P10; ctrl - P11; ctrl - P3; ctrl - P8; P11 - P10; P2 - P10; P2 - P11; P11 - P8; P2 - P3; P2 - P8; P3 - P8           |
| TC0200014738.hg.1       | TC0200014738.hg.1       | hsa_circ_0001077               | RBMS1          | NA       | 20.73 | 1.59<br>E-05 | 4.79<br>82 | 2.26<br>E-05 | ctrl - P10; ctrl - P11; P2 - ctrl; ctrl - P8; P11 - P10; P2 - P10; P3 - P10; P2 - P11; P11 - P8; P2 - P3; P2 - P8; P3 - P8 |
| TC0Y00007295.hg.1       | TC0Y00007295.hg.1       | sybo.aAug10-<br>unspliced      | sybo           | NA       | 20.65 | 1.62<br>E-05 | 4.79<br>02 | 2.30<br>E-05 | ctrl - P10; ctrl - P11; ctrl - P2; ctrl - P8; P11 - P10; P3 - P10; P8 - P10; P11 - P2; P3 - P11; P3 - P2; P3 - P8          |
| TC0Y00007300.hg.1       | TC0Y00007300.hg.1       | shorbo.aAug10-<br>unspliced    | shorbo         | NA       | 20.65 | 1.62<br>E-05 | 4.79<br>02 | 2.30<br>E-05 | ctrl - P10; ctrl - P11; ctrl - P2; ctrl - P8; P11 - P10; P3 - P10; P8 - P10; P11 - P2; P3 - P11; P3 - P2; P3 - P8          |
| TC0Y00007302.hg.1       | TC0Y00007302.hg.1       | pleybo.aAug10-<br>unspliced    | pleybo         | NA       | 20.65 | 1.62<br>E-05 | 4.79<br>02 | 2.30<br>E-05 | ctrl - P10; ctrl - P11; ctrl - P2; ctrl - P8; P11 - P10; P3 - P10; P8 - P10; P11 - P2; P3 - P11; P3 - P2; P3 - P8          |
| TC0Y00007304.hg.1       | TC0Y00007304.hg.1       | pabo.aAug10-<br>unspliced      | pabo           | NA       | 20.65 | 1.62<br>E-05 | 4.79<br>02 | 2.30<br>E-05 | ctrl - P10; ctrl - P11; ctrl - P2; ctrl - P8; P11 - P10; P3 - P10; P8 - P10; P11 - P2; P3 - P11; P3 - P2; P3 - P8          |
| TC0300012378.hg.1       | TC0300012378.hg.1       | charvawbo.aAug10-<br>unspliced | charvawbo      | NA       | 20.65 | 1.62<br>E-05 | 4.79<br>02 | 2.30<br>E-05 | ctrl - P10; ctrl - P11; ctrl - P3; ctrl - P8; P2 - P10; P10 - P8; P2 - P11; P11 - P8; P2 - P3; P2 - P8; P3 - P8            |
| TC1000007708.hg.1       | TC1000007708.hg.1       | NR_027508                      | FAM133CP       | 728640   | 20.65 | 1.62<br>E-05 | 4.78<br>97 | 2.30<br>E-05 | ctrl - P10; ctrl - P11; ctrl - P3; ctrl - P8; P2 - P10; P3 - P10; P10 - P8; P2 - P11; P3 - P11; P2 - P3; P2 - P8; P3 - P8  |
| TC1100011839.hg.1       | TC1100011839.hg.1       | borchoy.aAug10-<br>unspliced   | borchoy        | NA       | 20.65 | 1.62<br>E-05 | 4.78<br>94 | 2.30<br>E-05 | ctrl - P10; ctrl - P11; ctrl - P3; ctrl - P8; P2 - P10; P3 - P10; P2 - P11; P11 - P8; P2 - P3; P2 - P8; P3 - P8            |
| TC0700012263.hg.1       | TC0700012263.hg.1       | NA                             | NA             | NA       | 20.64 | 1.63<br>E-05 | 4.78<br>89 | 2.30<br>E-05 | ctrl - P10; P2 - ctrl; ctrl - P8; P11 - P10; P2 - P10; P3 - P10; P2 - P11; P11 - P8; P2 - P3; P2 - P8; P3 - P8             |
| TC1000011989.hg.1       | TC1000011989.hg.1       | NR_002917                      | SNORA19        | 10q26    | 20.60 | 1.64<br>E-05 | 4.78<br>4  | 2.33<br>E-05 | ctrl - P10; ctrl - P11; P2 - ctrl; ctrl - P3; ctrl - P8; P11 - P10; P2 - P10; P2 - P11; P2 - P3; P2 - P8                   |
| TC0400010704.hg.1       | TC0400010704.hg.1       | NM_001126328                   | LNK1           | 84708    | 20.59 | 1.65<br>E-05 | 4.78<br>35 | 2.33<br>E-05 | ctrl - P10; ctrl - P2; ctrl - P3; ctrl - P8; P11 - P10; P11 - P2; P11 - P3; P11 - P8                                       |
| TC0100012763.hg.1       | TC0100012763.hg.1       | gamabo.aAug10-<br>unspliced    | gamabo         | NA       | 20.59 | 1.65<br>E-05 | 4.78<br>31 | 2.33<br>E-05 | ctrl - P10; ctrl - P11; ctrl - P3; ctrl - P8; P2 - P10; P2 - P11; P11 - P8; P2 - P3; P2 - P8                               |
| TC0400011170.hg.1       | TC0400011170.hg.1       | lerflor.aAug10-<br>unspliced   | lerflor        | NA       | 20.57 | 1.66<br>E-05 | 4.78<br>07 | 2.34<br>E-05 | ctrl - P10; ctrl - P11; ctrl - P3; ctrl - P8; P11 - P10; P2 - P10; P2 - P11; P11 - P8; P2 - P3; P2 - P8                    |
| TC1700008129.hg.1       | TC1700008129.hg.1       | ENST00000384007                | Y_RNA          |          | 20.56 | 1.66<br>E-05 | 4.78<br>04 | 2.34<br>E-05 | ctrl - P10; ctrl - P11; ctrl - P3; ctrl - P8; P2 - P10; P10 - P8; P2 - P11; P3 - P11; P2 - P3; P2 - P8; P3 - P8            |
| TC0100011631.hg.1       | TC0100011631.hg.1       | lyber.aAug10-<br>unspliced     | lyber          | NA       | 20.49 | 1.69<br>E-05 | 4.77<br>22 | 2.38<br>E-05 | ctrl - P10; ctrl - P11; ctrl - P3; ctrl - P8; P11 - P10; P2 - P10; P3 - P10; P2 - P11; P11 - P8; P2 - P3; P2 - P8; P3 - P8 |
| TC0700010449.hg.1       | TC0700010449.hg.1       | NR_131935                      | LOC541472      | 541472   | 20.48 | 1.69<br>E-05 | 4.77<br>16 | 2.39<br>E-05 | P10 - ctrl; P3 - ctrl; P8 - ctrl; P10 - P11; P10 - P2; P3 - P11; P8 - P11; P3 - P2; P8 - P2                                |
| TC0200013343.hg.1       | TC0200013343.hg.1       | ENST00000608142.1              | RP11-1399P15.1 |          | 20.47 | 1.70<br>E-05 | 4.77<br>05 | 2.39<br>E-05 | ctrl - P10; ctrl - P11; ctrl - P2; ctrl - P3; ctrl - P8; P11 - P10; P11 - P2; P11 - P3; P11 - P8                           |
| TC1000008436.hg.1       | TC1000008436.hg.1       | kyparby.aAug10-<br>unspliced   | kyparby        | NA       | 20.47 | 1.70<br>E-05 | 4.77<br>03 | 2.39<br>E-05 | ctrl - P10; ctrl - P11; ctrl - P3; ctrl - P8; P2 - P10; P3 - P10; P2 - P11; P3 - P11; P2 - P3; P2 - P8; P3 - P8            |
| HTA2-pos-3145791_st     | 23150341                | NA                             | NA             | NA       | 20.37 | 1.74<br>E-05 | 4.75<br>94 | 2.45<br>E-05 | ctrl - P10; ctrl - P11; ctrl - P3; ctrl - P8; P11 - P10; P2 - P10; P3 - P10; P2 - P11; P2 - P3; P2 - P8; P3 - P8           |
| TC1500007556.hg.1       | TC1500007556.hg.1       | shorzo.aAug10-<br>unspliced    | shorzo         | NA       | 20.35 | 1.75<br>E-05 | 4.75<br>66 | 2.46<br>E-05 | ctrl - P10; ctrl - P11; ctrl - P3; ctrl - P8; P10 - P11; P2 - P10; P10 - P8; P2 - P11; P3 - P11; P2 - P3; P2 - P8; P3 - P8 |
| TC1900007796.hg.1       | TC1900007796.hg.1       | rycho.aAug10-<br>unspliced     | rycho          | NA       | 20.34 | 1.75<br>E-05 | 4.75<br>58 | 2.47<br>E-05 | ctrl - P10; ctrl - P11; P2 - ctrl; ctrl - P8; P11 - P10; P2 - P10; P3 - P10; P2 - P11; P11 - P8; P2 - P3; P2 - P8; P3 - P8 |
| TC0X00010164.hg.1       | TC0X00010164.hg.1       | NR_110646                      | CHMP182P       | 1.01E+08 | 20.27 | 1.79<br>E-05 | 4.74<br>74 | 2.51<br>E-05 | ctrl - P10; ctrl - P3; ctrl - P8; P11 - P10; P2 - P10; P3 - P10; P2 - P11; P11 - P8; P2 - P3; P2 - P8; P3 - P8             |
| TC1200008127.hg.1       | TC1200008127.hg.1       | cheeno.aAug10-<br>unspliced    | cheeno         | NA       | 20.26 | 1.79<br>E-05 | 4.74<br>67 | 2.52<br>E-05 | ctrl - P10; ctrl - P11; ctrl - P3; ctrl - P8; P11 - P10; P2 - P10; P3 - P10; P2 - P11; P11 - P8; P2 - P3; P2 - P8          |
| TC2000007158.hg.1       | TC2000007158.hg.1       | NA                             | NA             | NA       | 20.19 | 1.82<br>E-05 | 4.73<br>91 | 2.56<br>E-05 | ctrl - P10; ctrl - P11; ctrl - P3; ctrl - P8; P2 - P10; P10 - P8; P2 - P11; P3 - P11; P2 - P3; P2 - P8; P3 - P8            |
| TC0100015904.hg.1       | TC0100015904.hg.1       | ronira.aAug10-<br>unspliced    | ronira         | NA       | 20.15 | 1.85<br>E-05 | 4.73<br>38 | 2.59<br>E-05 | ctrl - P10; ctrl - P11; ctrl - P3; ctrl - P8; P11 - P10; P2 - P10; P3 - P10; P2 - P11; P2 - P3; P2 - P8; P3 - P8           |
| TC0200015602.hg.1       | TC0200015602.hg.1       | NA                             | NA             | NA       | 20.12 | 1.86<br>E-05 | 4.73<br>13 | 2.60<br>E-05 | ctrl - P10; ctrl - P11; ctrl - P3; ctrl - P8; P2 - P10; P2 - P11; P11 - P8; P2 - P3; P2 - P8                               |
| TC1400007233.hg.1       | TC1400007233.hg.1       | jybuby.aAug10-<br>unspliced    | jybuby         | NA       | 20.09 | 1.87<br>E-05 | 4.72<br>74 | 2.63<br>E-05 | ctrl - P10; ctrl - P11; ctrl - P3; ctrl - P8; P2 - P10; P3 - P10; P2 - P11; P11 - P8; P2 - P3; P2 - P8; P3 - P8            |

|                   |                   |                                 |              |          |            |              |            |              |                                                                                                                            |
|-------------------|-------------------|---------------------------------|--------------|----------|------------|--------------|------------|--------------|----------------------------------------------------------------------------------------------------------------------------|
| TC0400007800.hg.1 | TC0400007800.hg.1 | nusmuby.aAug10-<br>unspliced    | nusmuby      | NA       | 20.08<br>6 | 1.88<br>E-05 | 4.72<br>65 | 2.63<br>E-05 | ctrl - P10; ctrl - P11; ctrl - P3; ctrl - P8; P11 - P10; P2 - P10; P11 - P3; P11 - P8; P2 - P3; P2 - P8                    |
| TC0600010124.hg.1 | TC0600010124.hg.1 | slajo.aAug10-<br>unspliced      | slajo        | NA       | 20.07<br>9 | 1.88<br>E-05 | 4.72<br>57 | 2.63<br>E-05 | ctrl - P10; ctrl - P11; ctrl - P3; ctrl - P8; P11 - P10; P2 - P10; P2 - P11; P11 - P8; P2 - P3; P2 - P8                    |
| TC0500010431.hg.1 | TC0500010431.hg.1 | rorfler.aAug10-<br>unspliced    | rorfler      | NA       | 20.07<br>7 | 1.88<br>E-05 | 4.72<br>54 | 2.63<br>E-05 | ctrl - P10; ctrl - P11; P2 - ctrl; ctrl - P3; ctrl - P8; P2 - P10; P10 - P8; P2 - P11; P11 - P8; P2 - P3; P2 - P8          |
| TC0200010538.hg.1 | TC0200010538.hg.1 | mogubu.aAug10-<br>unspliced     | mogubu       | NA       | 20.04<br>4 | 1.90<br>E-05 | 4.72<br>17 | 2.65<br>E-05 | ctrl - P10; ctrl - P11; ctrl - P3; ctrl - P8; P11 - P10; P2 - P10; P2 - P11; P11 - P3; P11 - P8; P2 - P3; P2 - P8          |
| TC1200011940.hg.1 | TC1200011940.hg.1 | uc058thw.1                      | U7           | NA       | 20.01<br>7 | 1.91<br>E-05 | 4.71<br>87 | 2.67<br>E-05 | ctrl - P10; ctrl - P11; ctrl - P8; P10 - P11; P2 - P10; P10 - P8; P2 - P11; P3 - P11; P2 - P3; P2 - P8; P3 - P8            |
| TC0X00006704.hg.1 | TC0X00006704.hg.1 | NM_001080975                    | REPS2        | 9185     | 19.99<br>7 | 1.92<br>E-05 | 4.71<br>64 | 2.68<br>E-05 | P10 - ctrl; P11 - ctrl; P3 - ctrl; P8 - ctrl; P10 - P11; P10 - P2; P3 - P11; P8 - P11; P3 - P2; P8 - P2                    |
| TC1100008900.hg.1 | TC1100008900.hg.1 | NM_001195005                    | C11orf70     | 85016    | 19.98<br>2 | 1.93<br>E-05 | 4.71<br>47 | 2.69<br>E-05 | ctrl - P10; ctrl - P11; ctrl - P2; ctrl - P3; ctrl - P8; P11 - P10; P2 - P10; P3 - P10; P11 - P8; P2 - P8; P3 - P8         |
| TC0300007650.hg.1 | TC0300007650.hg.1 | NA                              | NA           | NA       | 19.92<br>8 | 1.96<br>E-05 | 4.70<br>85 | 2.73<br>E-05 | ctrl - P10; ctrl - P11; ctrl - P3; ctrl - P8; P2 - P10; P2 - P11; P11 - P8; P2 - P3; P2 - P8; P3 - P8                      |
| TC1300007848.hg.1 | TC1300007848.hg.1 | versharbu.aAug10-<br>unspliced  | versharbu    | NA       | 19.92<br>8 | 1.96<br>E-05 | 4.70<br>85 | 2.73<br>E-05 | ctrl - P10; ctrl - P11; ctrl - P3; ctrl - P8; P11 - P10; P2 - P10; P3 - P10; P11 - P8; P2 - P3; P2 - P8; P3 - P8           |
| TC0100013274.hg.1 | TC0100013274.hg.1 | meeloybu.aAug10-<br>unspliced   | meeloybu     | NA       | 19.92<br>5 | 1.96<br>E-05 | 4.70<br>82 | 2.73<br>E-05 | ctrl - P10; ctrl - P11; ctrl - P3; ctrl - P8; P2 - P10; P3 - P10; P2 - P11; P11 - P8; P2 - P3; P2 - P8                     |
| TC0900008444.hg.1 | TC0900008444.hg.1 | NR_039814                       | MIR4668      | 1.01E+08 | 19.89<br>8 | 1.97<br>E-05 | 4.70<br>51 | 2.75<br>E-05 | ctrl - P10; ctrl - P11; ctrl - P3; ctrl - P8; P2 - P10; P2 - P11; P2 - P3; P2 - P8                                         |
| TC1700012102.hg.1 | TC1700012102.hg.1 | jersker.aAug10-<br>unspliced    | jersker      | NA       | 19.87<br>8 | 1.98<br>E-05 | 4.70<br>28 | 2.76<br>E-05 | ctrl - P10; ctrl - P11; ctrl - P2; ctrl - P3; ctrl - P8; P2 - P10; P2 - P11; P2 - P3; P2 - P8; P3 - P8                     |
| TC0600011662.hg.1 | TC0600011662.hg.1 | snawspuby.aAug10-<br>unspliced  | snawspuby    | NA       | 19.87<br>8 | 1.98<br>E-05 | 4.70<br>28 | 2.76<br>E-05 | ctrl - P10; ctrl - P11; ctrl - P3; ctrl - P8; P2 - P10; P2 - P11; P11 - P8; P2 - P3; P2 - P8                               |
| TC0700012837.hg.1 | TC0700012837.hg.1 | ENST00000602609.1               | RP5-894A10.6 |          | 19.87<br>7 | 1.98<br>E-05 | 4.70<br>28 | 2.76<br>E-05 | ctrl - P10; ctrl - P11; ctrl - P3; ctrl - P8; P11 - P10; P2 - P10; P3 - P10; P2 - P11; P11 - P8; P2 - P3; P2 - P8; P3 - P8 |
| TC1100009296.hg.1 | TC1100009296.hg.1 | rorkarby.bAug10-<br>unspliced   | rorkarby     | NA       | 19.86<br>2 | 1.99<br>E-05 | 4.70<br>1  | 2.77<br>E-05 | ctrl - P10; ctrl - P11; ctrl - P3; ctrl - P8; P11 - P10; P2 - P10; P3 - P10; P2 - P11; P11 - P8; P2 - P3; P2 - P8; P3 - P8 |
| TC2100007085.hg.1 | TC2100007085.hg.1 | dorbaw.aAug10-<br>unspliced     | dorbaw       | NA       | 19.80<br>2 | 2.02<br>E-05 | 4.69<br>42 | 2.81<br>E-05 | ctrl - P10; ctrl - P11; ctrl - P3; ctrl - P8; P2 - P10; P2 - P11; P11 - P8; P2 - P3; P2 - P8; P3 - P8                      |
| TC0300011414.hg.1 | TC0300011414.hg.1 | gunarbo.aAug10-<br>unspliced    | gunarbo      | NA       | 19.2<br>78 | 2.03<br>E-05 | 4.69<br>16 | 2.82<br>E-05 | ctrl - P10; ctrl - P11; ctrl - P3; ctrl - P8; P2 - P10; P2 - P11; P11 - P8; P2 - P3; P2 - P8                               |
| TC0200012278.hg.1 | TC0200012278.hg.1 | ENST00000623854                 | RP11-314C9.1 |          | 19.77<br>6 | 2.04<br>E-05 | 4.69<br>12 | 2.83<br>E-05 | P11 - ctrl; P3 - ctrl; P11 - P10; P3 - P10; P11 - P2; P11 - P8; P3 - P2; P3 - P8                                           |
| TC0500008831.hg.1 | TC0500008831.hg.1 | sleyjy.aAug10-<br>unspliced     | sleyjy       | NA       | 19.76<br>1 | 2.04<br>E-05 | 4.68<br>95 | 2.83<br>E-05 | ctrl - P11; P2 - ctrl; ctrl - P8; P10 - P11; P2 - P10; P2 - P11; P3 - P11; P2 - P3; P2 - P8; P3 - P8                       |
| TC1700012284.hg.1 | TC1700012284.hg.1 | NA                              | NA           | NA       | 19.74<br>8 | 2.05<br>E-05 | 4.68<br>79 | 2.84<br>E-05 | ctrl - P10; ctrl - P11; ctrl - P3; ctrl - P8; P11 - P10; P2 - P10; P2 - P11; P11 - P3; P11 - P8; P2 - P3; P2 - P8          |
| TC0200015240.hg.1 | TC0200015240.hg.1 | NA                              | NA           | NA       | 19.72<br>9 | 2.06<br>E-05 | 4.68<br>58 | 2.86<br>E-05 | ctrl - P10; ctrl - P3; ctrl - P8; P11 - P10; P2 - P10; P3 - P10; P11 - P3; P11 - P8; P2 - P3; P2 - P8; P3 - P8             |
| TC0600011060.hg.1 | TC0600011060.hg.1 | lafloyby.aAug10-<br>unspliced   | lafloyby     | NA       | 19.70<br>2 | 2.08<br>E-05 | 4.68<br>27 | 2.87<br>E-05 | ctrl - P10; ctrl - P11; P2 - ctrl; ctrl - P3; ctrl - P8; P2 - P10; P2 - P11; P2 - P3; P2 - P8                              |
| TC1000007525.hg.1 | TC1000007525.hg.1 | romare.aAug10-<br>unspliced     | romare       | NA       | 19.69<br>1 | 2.08<br>E-05 | 4.68<br>15 | 2.88<br>E-05 | ctrl - P10; ctrl - P11; ctrl - P8; P11 - P10; P2 - P10; P3 - P10; P2 - P11; P3 - P11; P11 - P8; P2 - P3; P2 - P8; P3 - P8  |
| TC1100007808.hg.1 | TC1100007808.hg.1 | hsa_circ_0000312                | SDHAF2       | NA       | 19.68<br>1 | 2.09<br>E-05 | 4.68<br>03 | 2.89<br>E-05 | ctrl - P10; ctrl - P11; P2 - ctrl; ctrl - P8; P2 - P10; P3 - P10; P2 - P11; P11 - P8; P2 - P3; P2 - P8; P3 - P8            |
| TC1000010242.hg.1 | TC1000010242.hg.1 | gloynorby.aAug10-<br>unspliced  | gloynorby    | NA       | 19.67<br>8 | 2.09<br>E-05 | 4.67<br>99 | 2.89<br>E-05 | ctrl - P10; ctrl - P11; ctrl - P3; ctrl - P8; P2 - P10; P3 - P10; P2 - P11; P11 - P8; P2 - P3; P2 - P8; P3 - P8            |
| TC0600010130.hg.1 | TC0600010130.hg.1 | kasoya.aAug10-<br>unspliced     | kasoya       | NA       | 19.67<br>1 | 2.09<br>E-05 | 4.67<br>91 | 2.89<br>E-05 | ctrl - P10; ctrl - P11; ctrl - P3; ctrl - P8; P11 - P10; P2 - P10; P3 - P10; P2 - P11; P11 - P8; P2 - P3; P2 - P8; P3 - P8 |
| TC0200013797.hg.1 | TC0200013797.hg.1 | ENST00000453431                 | AC009963.3   | NA       | 19.63<br>5 | 2.11<br>E-05 | 4.67<br>5  | 2.92<br>E-05 | ctrl - P10; ctrl - P3; ctrl - P8; P11 - P10; P2 - P10; P11 - P3; P11 - P8; P2 - P3; P2 - P8; P3 - P8                       |
| TC0800008830.hg.1 | TC0800008830.hg.1 | meyskeybu.aAug10-<br>unspliced  | meyskeybu    | NA       | 19.61<br>8 | 2.12<br>E-05 | 4.67<br>31 | 2.93<br>E-05 | P2 - ctrl; P3 - ctrl; P2 - P10; P3 - P10; P2 - P11; P3 - P11; P2 - P8; P3 - P8                                             |
| TC0100018332.hg.1 | TC0100018332.hg.1 | NA                              | NA           | NA       | 19.61<br>4 | 2.13<br>E-05 | 4.67<br>25 | 2.93<br>E-05 | ctrl - P10; ctrl - P3; ctrl - P8; P11 - P10; P2 - P10; P11 - P3; P11 - P8; P2 - P3; P2 - P8                                |
| TC0600006799.hg.1 | TC0600006799.hg.1 | floyklorby.aAug10-<br>unspliced | floyklorby   | NA       | 19.60<br>2 | 2.13<br>E-05 | 4.67<br>12 | 2.94<br>E-05 | ctrl - P10; ctrl - P11; P2 - ctrl; ctrl - P3; ctrl - P8; P2 - P10; P2 - P11; P2 - P3; P2 - P8                              |
| TC1100011842.hg.1 | TC1100011842.hg.1 | duchoy.aAug10-<br>unspliced     | duchoy       | NA       | 19.59<br>3 | 2.14<br>E-05 | 4.67<br>02 | 2.94<br>E-05 | ctrl - P10; P2 - ctrl; ctrl - P8; P2 - P10; P3 - P10; P10 - P8; P2 - P11; P11 - P8; P2 - P3; P2 - P8; P3 - P8              |
| TC0200015918.hg.1 | TC0200015918.hg.1 | NA                              | NA           | NA       | 19.58<br>6 | 2.14<br>E-05 | 4.66<br>94 | 2.95<br>E-05 | ctrl - P10; ctrl - P2; ctrl - P3; ctrl - P8; P11 - P10; P2 - P10; P11 - P2; P11 - P3; P11 - P8; P2 - P3; P2 - P8           |
| TC0600008550.hg.1 | TC0600008550.hg.1 | NA                              | NA           | NA       | 19.49<br>9 | 2.19<br>E-05 | 4.65<br>93 | 3.02<br>E-05 | P10 - ctrl; P2 - ctrl; P8 - ctrl; P10 - P11; P10 - P3; P2 - P11; P8 - P11; P2 - P3; P8 - P3                                |

|                   |                   |                                |                  |      |             |              |            |              |                                                                                                                              |
|-------------------|-------------------|--------------------------------|------------------|------|-------------|--------------|------------|--------------|------------------------------------------------------------------------------------------------------------------------------|
| TC0600007233.hg.1 | TC0600007233.hg.1 | NA                             | NA               | NA   | 19.49<br>5  | 2.19<br>E-05 | 4.65<br>89 | 3.02<br>E-05 | ctrl - P10; ctrl - P11; ctrl - P3; ctrl - P8; P2 - P10; P3 - P10; P2 - P11; P2 - P3; P2 - P8; P3 - P8                        |
| TC0600010128.hg.1 | TC0600010128.hg.1 | bawfleeby.aAug10-<br>unspliced | bawfleeby        | NA   | 19.48<br>7  | 2.20<br>E-05 | 4.65<br>79 | 3.02<br>E-05 | ctrl - P10; ctrl - P11; ctrl - P3; ctrl - P8; P11 - P10; P2 - P10; P2 - P11; P11 - P3; P11 - P8; P2 - P3; P2 - P8; P3 - P8   |
| TC1200010909.hg.1 | TC1200010909.hg.1 | uc058pnx.1                     | RNU7-40P         | NA   | 19.46<br>4  | 2.21<br>E-05 | 4.65<br>52 | 3.04<br>E-05 | ctrl - P10; ctrl - P11; ctrl - P8; P2 - P10; P3 - P10; P2 - P11; P3 - P11; P2 - P8; P3 - P8                                  |
| TC2000007241.hg.1 | TC2000007241.hg.1 | joyvoy.aAug10-<br>unspliced    | joyvoy           | NA   | 19.45<br>3  | 2.22<br>E-05 | 4.65<br>4  | 3.05<br>E-05 | ctrl - P10; ctrl - P11; ctrl - P2; ctrl - P3; ctrl - P8; P11 - P10; P2 - P10; P3 - P10; P11 - P3; P11 - P8; P2 - P8; P3 - P8 |
| TC0100010594.hg.1 | TC0100010594.hg.1 | uc057nhr.1                     | Z98750.1         | NA   | 19.45<br>1  | 2.22<br>E-05 | 4.65<br>37 | 3.05<br>E-05 | ctrl - P10; ctrl - P11; P2 - ctrl; ctrl - P3; ctrl - P8; P2 - P10; P2 - P11; P11 - P8; P2 - P3; P2 - P8; P3 - P8             |
| TC0100014051.hg.1 | TC0100014051.hg.1 | NA                             | NA               | NA   | 19.44<br>4  | 2.22<br>E-05 | 4.65<br>29 | 3.05<br>E-05 | ctrl - P11; P2 - ctrl; ctrl - P8; P10 - P11; P2 - P10; P2 - P11; P3 - P11; P8 - P11; P2 - P8; P3 - P8                        |
| TC1300008293.hg.1 | TC1300008293.hg.1 | EFHA1.jAug10-<br>unspliced     | EFHA1            | NA   | 19.43<br>3  | 2.23<br>E-05 | 4.65<br>16 | 3.06<br>E-05 | ctrl - P10; ctrl - P11; ctrl - P3; ctrl - P8; P11 - P10; P2 - P10; P2 - P11; P11 - P8; P2 - P3; P2 - P8                      |
| TC0100016970.hg.1 | TC0100016970.hg.1 | ENST00000362601                | Y_RNA            |      | 19.41<br>5  | 2.24<br>E-05 | 4.64<br>95 | 3.07<br>E-05 | ctrl - P10; ctrl - P11; ctrl - P3; ctrl - P8; P2 - P10; P3 - P10; P2 - P11; P2 - P3; P2 - P8; P3 - P8                        |
| TC0400011825.hg.1 | TC0400011825.hg.1 | meyku.aAug10-<br>unspliced     | meyku            | NA   | 19.38<br>4  | 2.26<br>E-05 | 4.64<br>59 | 3.09<br>E-05 | ctrl - P10; ctrl - P3; ctrl - P8; P11 - P10; P2 - P10; P3 - P10; P2 - P11; P11 - P8; P2 - P3; P2 - P8; P3 - P8               |
| TC1700006558.hg.1 | TC1700006558.hg.1 | ENST00000622996                | RP11-135N5.3     |      | 19.37<br>7  | 2.26<br>E-05 | 4.64<br>51 | 3.10<br>E-05 | ctrl - P10; ctrl - P11; ctrl - P3; ctrl - P8; P2 - P10; P2 - P11; P11 - P8; P2 - P3; P2 - P8; P3 - P8                        |
| TC1700008264.hg.1 | TC1700008264.hg.1 | blymee.aAug10-<br>unspliced    | blymee           | NA   | 19.37<br>7  | 2.26<br>E-05 | 4.64<br>51 | 3.10<br>E-05 | ctrl - P10; ctrl - P11; ctrl - P3; ctrl - P8; P2 - P10; P2 - P11; P2 - P3; P2 - P8; P3 - P8                                  |
| TC0100007242.hg.1 | TC0100007242.hg.1 | warrarbo.aAug10-<br>unspliced  | warrarbo         | NA   | 19.35<br>4  | 2.28<br>E-05 | 4.64<br>24 | 3.11<br>E-05 | ctrl - P10; ctrl - P11; ctrl - P3; ctrl - P8; P11 - P10; P2 - P10; P2 - P11; P11 - P3; P11 - P8; P2 - P3; P2 - P8            |
| TC0200009760.hg.1 | TC0200009760.hg.1 | loydo.bAug10-<br>unspliced     | loydo            | NA   | 19.35<br>1  | 2.28<br>E-05 | 4.64<br>2  | 3.12<br>E-05 | ctrl - P10; ctrl - P3; ctrl - P8; P11 - P10; P2 - P10; P3 - P10; P2 - P11; P11 - P8; P2 - P3; P2 - P8; P3 - P8               |
| TC2200007916.hg.1 | TC2200007916.hg.1 | ENST00000441167.1              | XXbac-B476C20.13 |      | 19.34<br>7  | 2.28<br>E-05 | 4.64<br>16 | 3.12<br>E-05 | ctrl - P10; ctrl - P11; ctrl - P3; ctrl - P8; P2 - P10; P3 - P10; P2 - P11; P11 - P8; P2 - P3; P2 - P8; P3 - P8              |
| TC0700010688.hg.1 | TC0700010688.hg.1 | neegloyby.aAug10-<br>unspliced | neegloyby        | NA   | 19.34<br>2  | 2.29<br>E-05 | 4.64<br>1  | 3.12<br>E-05 | ctrl - P10; ctrl - P11; ctrl - P3; ctrl - P8; P2 - P10; P10 - P8; P2 - P11; P2 - P3; P2 - P8; P3 - P8                        |
| TC0200013564.hg.1 | TC0200013564.hg.1 | NR_103732_2                    | LOC100506076     |      | 19.32<br>3  | 2.30<br>E-05 | 4.63<br>88 | 3.13<br>E-05 | ctrl - P10; ctrl - P11; ctrl - P8; P2 - P10; P3 - P10; P2 - P11; P3 - P11; P8 - P11; P2 - P8; P3 - P8                        |
| TC1000010833.hg.1 | TC1000010833.hg.1 | ENST00000435889                | RP11-474D14.2    | NA   | 19.30<br>6  | 2.31<br>E-05 | 4.63<br>68 | 3.15<br>E-05 | ctrl - P10; ctrl - P11; ctrl - P8; P2 - P10; P3 - P10; P10 - P8; P2 - P11; P3 - P11; P11 - P8; P2 - P3; P2 - P8; P3 - P8     |
| TC0600007889.hg.1 | TC0600007889.hg.1 | flarjaw.aAug10-<br>unspliced   | flarjaw          | NA   | 19.27<br>6  | 2.33<br>E-05 | 4.63<br>33 | 3.17<br>E-05 | ctrl - P10; ctrl - P11; ctrl - P8; P2 - P10; P3 - P10; P2 - P11; P3 - P11; P2 - P3; P2 - P8; P3 - P8                         |
| TC1300008559.hg.1 | TC1300008559.hg.1 | wawcha.aAug10-<br>unspliced    | wawcha           | NA   | 19.27<br>5  | 2.33<br>E-05 | 4.63<br>32 | 3.17<br>E-05 | ctrl - P10; ctrl - P11; ctrl - P3; ctrl - P8; P2 - P10; P10 - P8; P2 - P11; P11 - P8; P2 - P3; P2 - P8; P3 - P8              |
| TC0200010697.hg.1 | TC0200010697.hg.1 | cherklu.aAug10-<br>unspliced   | cherklu          | NA   | 19.24<br>3  | 2.35<br>E-05 | 4.62<br>95 | 3.19<br>E-05 | ctrl - P10; ctrl - P11; ctrl - P3; ctrl - P8; P11 - P10; P2 - P10; P2 - P11; P11 - P8; P2 - P3; P2 - P8; P3 - P8             |
| TC0300012059.hg.1 | TC0300012059.hg.1 | yamara.aAug10-<br>unspliced    | yamara           | NA   | 19.19<br>24 | 2.35<br>E-05 | 4.62<br>91 | 3.19<br>E-05 | ctrl - P10; ctrl - P11; P2 - ctrl; ctrl - P8; P2 - P10; P3 - P10; P2 - P11; P3 - P11; P11 - P8; P2 - P3; P2 - P8; P3 - P8    |
| TC0300007138.hg.1 | TC0300007138.hg.1 | koyfawbo.aAug10-<br>unspliced  | koyfawbo         | NA   | 19.23<br>9  | 2.35<br>E-05 | 4.62<br>9  | 3.19<br>E-05 | ctrl - P10; ctrl - P11; ctrl - P8; P11 - P10; P2 - P10; P3 - P10; P2 - P11; P11 - P8; P2 - P3; P2 - P8; P3 - P8              |
| TC1000011301.hg.1 | TC1000011301.hg.1 | zoyloy.aAug10-<br>unspliced    | zoyloy           | NA   | 19.19<br>22 | 2.36<br>E-05 | 4.62<br>67 | 3.21<br>E-05 | ctrl - P10; ctrl - P11; ctrl - P3; ctrl - P8; P2 - P10; P10 - P8; P2 - P11; P11 - P8; P2 - P3; P2 - P8; P3 - P8              |
| TC0200014855.hg.1 | TC0200014855.hg.1 | NA                             | NA               | NA   | 19.19<br>4  | 2.38<br>E-05 | 4.62<br>37 | 3.23<br>E-05 | ctrl - P10; ctrl - P3; ctrl - P8; P11 - P10; P2 - P10; P3 - P10; P11 - P3; P11 - P8; P2 - P3; P2 - P8                        |
| TC0100015491.hg.1 | TC0100015491.hg.1 | remema.aAug10-<br>unspliced    | remema           |      | 19.19<br>13 | 2.42<br>E-05 | 4.61<br>62 | 3.28<br>E-05 | ctrl - P10; ctrl - P11; P2 - ctrl; ctrl - P8; P2 - P10; P3 - P10; P2 - P11; P2 - P3; P2 - P8; P3 - P8                        |
| TC0800011580.hg.1 | TC0800011580.hg.1 | varger.aAug10-<br>unspliced    | varger           | NA   | 19.12<br>8  | 2.42<br>E-05 | 4.61<br>6  | 3.28<br>E-05 | ctrl - P10; ctrl - P11; ctrl - P8; P10 - P11; P2 - P10; P10 - P8; P2 - P11; P3 - P11; P2 - P3; P2 - P8; P3 - P8              |
| TC1200012241.hg.1 | TC1200012241.hg.1 | doyfu.aAug10-<br>unspliced     | doyfu            | NA   | 19.11<br>8  | 2.43<br>E-05 | 4.61<br>47 | 3.29<br>E-05 | ctrl - P10; ctrl - P11; ctrl - P3; ctrl - P8; P2 - P10; P2 - P11; P2 - P3; P2 - P8                                           |
| TC0200008001.hg.1 | TC0200008001.hg.1 | zeyklar.aAug10-<br>unspliced   | zeyklar          | NA   | 19.09<br>7  | 2.44<br>E-05 | 4.61<br>23 | 3.31<br>E-05 | ctrl - P10; ctrl - P11; ctrl - P3; ctrl - P8; P11 - P10; P2 - P10; P3 - P10; P2 - P11; P11 - P8; P2 - P3; P2 - P8; P3 - P8   |
| TC0100009447.hg.1 | TC0100009447.hg.1 | NA                             | NA               | NA   | 19.07<br>8  | 2.45<br>E-05 | 4.61<br>01 | 3.32<br>E-05 | ctrl - P10; ctrl - P11; ctrl - P3; ctrl - P8; P10 - P11; P2 - P10; P10 - P8; P2 - P11; P2 - P3; P2 - P8                      |
| TC1600008234.hg.1 | TC1600008234.hg.1 | staglo.aAug10-<br>unspliced    | staglo           | NA   | 19.07<br>6  | 2.46<br>E-05 | 4.60<br>98 | 3.32<br>E-05 | ctrl - P10; ctrl - P11; ctrl - P3; ctrl - P8; P2 - P10; P2 - P11; P11 - P8; P2 - P3; P2 - P8; P3 - P8                        |
| TC0100009931.hg.1 | TC0100009931.hg.1 | gapybu.aAug10-<br>unspliced    | gapybu           | NA   | 19.07<br>4  | 2.46<br>E-05 | 4.60<br>96 | 3.32<br>E-05 | ctrl - P10; ctrl - P11; ctrl - P3; ctrl - P8; P2 - P10; P2 - P11; P2 - P3; P2 - P8                                           |
| TC0100008931.hg.1 | TC0100008931.hg.1 | harero.aAug10-<br>unspliced    | harero           | NA   | 19.06<br>8  | 2.46<br>E-05 | 4.60<br>88 | 3.33<br>E-05 | ctrl - P10; P2 - ctrl; ctrl - P8; P11 - P10; P2 - P10; P3 - P10; P2 - P11; P3 - P11; P11 - P8; P2 - P8; P3 - P8              |
| TC0300009731.hg.1 | TC0300009731.hg.1 | NM_001242314                   | MAP3K13          | 9175 | 19.06<br>7  | 2.46<br>E-05 | 4.60<br>88 | 3.33<br>E-05 | P10 - ctrl; P11 - ctrl; P3 - ctrl; P8 - ctrl; P10 - P11; P10 - P2; P10 - P3; P11 - P2; P8 - P11; P3 - P2; P8 - P2; P8 - P3   |



|                   |                   |                                 |               |        |       |      |      |      |                                                                                                                            |
|-------------------|-------------------|---------------------------------|---------------|--------|-------|------|------|------|----------------------------------------------------------------------------------------------------------------------------|
| TC0700011487.hg.1 | TC0700011487.hg.1 | GTF2IRD2P1.bAug10               | GTF2IRD2P1    | NA     | 19.05 | 2.47 | 4.60 | 3.34 | ctrl - P10; ctrl - P2; ctrl - P3; ctrl - P8; P11 - P10; P10 - P3; P11 - P2; P11 - P3; P11 - P8; P2 - P3; P2 - P8           |
| TC0300006832.hg.1 | TC0300006832.hg.1 | spudoybo.aAug10-<br>unspliced   | spudoybo      | NA     | 19.05 | 2.47 | 4.60 | 3.34 | ctrl - P10; ctrl - P11; P2 - ctrl; ctrl - P8; P11 - P10; P2 - P10; P3 - P10; P2 - P11; P3 - P11; P2 - P3; P2 - P8; P3 - P8 |
| TC1200006688.hg.1 | TC1200006688.hg.1 | NM_001297698                    | NANOG         | 79923  | 19.05 | 2.47 | 4.60 | 3.34 | ctrl - P10; ctrl - P8; P11 - P10; P2 - P10; P3 - P10; P2 - P11; P11 - P8; P2 - P3; P2 - P8; P3 - P8                        |
| TC1000007371.hg.1 | TC1000007371.hg.1 | skeyglerbu.aAug10-<br>unspliced | skeyglerbu    | NA     | 19.02 | 2.49 | 4.60 | 3.36 | P10 - ctrl; ctrl - P11; ctrl - P2; P10 - P11; P10 - P2; P10 - P3; P10 - P8; P3 - P11; P8 - P11; P3 - P2; P8 - P2           |
| TC1200012297.hg.1 | TC1200012297.hg.1 | ENST00000602601.1               | RP11-214K3.20 |        | 19.02 | 2.49 | 4.60 | 3.36 | ctrl - P10; ctrl - P11; ctrl - P3; ctrl - P8; P11 - P10; P2 - P10; P3 - P10; P2 - P11; P11 - P8; P2 - P3; P2 - P8; P3 - P8 |
| TC0600012033.hg.1 | TC0600012033.hg.1 | peyjee.aAug10-<br>unspliced     | peyjee        | NA     | 18.96 | 2.53 | 4.59 | 3.41 | ctrl - P10; ctrl - P11; ctrl - P3; ctrl - P8; P11 - P10; P2 - P10; P3 - P10; P2 - P11; P11 - P8; P2 - P3; P2 - P8; P3 - P8 |
| TC0300013069.hg.1 | TC0300013069.hg.1 | serjawbu.aAug10-<br>unspliced   | serjawbu      | NA     | 18.95 | 2.54 | 4.59 | 3.42 | ctrl - P10; P2 - ctrl; ctrl - P3; ctrl - P8; P11 - P10; P2 - P10; P2 - P11; P11 - P8; P2 - P3; P2 - P8; P3 - P8            |
| TC1300007111.hg.1 | TC1300007111.hg.1 | swoycha.aAug10-<br>unspliced    | swoycha       | NA     | 18.93 | 2.55 | 4.59 | 3.44 | ctrl - P10; ctrl - P11; ctrl - P8; P11 - P10; P2 - P10; P3 - P10; P2 - P11; P11 - P8; P2 - P3; P2 - P8; P3 - P8            |
| TC0300012057.hg.1 | TC0300012057.hg.1 | glorbobu.aAug10-<br>unspliced   | glorbobu      | NA     | 18.92 | 2.56 | 4.59 | 3.45 | ctrl - P10; ctrl - P11; ctrl - P8; P2 - P10; P3 - P10; P2 - P11; P11 - P8; P2 - P3; P2 - P8; P3 - P8                       |
| TC0600009965.hg.1 | TC0600009965.hg.1 | storjee.aAug10-<br>unspliced    | storjee       | NA     | 18.88 | 2.58 | 4.58 | 3.47 | ctrl - P10; ctrl - P11; P2 - ctrl; ctrl - P8; P2 - P10; P3 - P10; P2 - P11; P11 - P8; P2 - P3; P2 - P8; P3 - P8            |
| TC2200007424.hg.1 | TC2200007424.hg.1 | tawtey.aAug10-<br>unspliced     | tawtey        | NA     | 18.73 | 2.69 | 4.56 | 3.62 | ctrl - P10; ctrl - P11; ctrl - P3; ctrl - P8; P2 - P10; P2 - P11; P11 - P8; P2 - P3; P2 - P8                               |
| TC2000011265.hg.1 | TC2000011265.hg.1 | NA                              | NA            | NA     | 18.73 | 2.70 | 4.56 | 3.62 | ctrl - P10; ctrl - P11; ctrl - P3; ctrl - P8; P11 - P10; P2 - P10; P3 - P10; P11 - P3; P11 - P8; P2 - P3; P2 - P8          |
| TC1100011840.hg.1 | TC1100011840.hg.1 | makami.aAug10-<br>unspliced     | makami        | NA     | 18.66 | 2.75 | 4.56 | 3.69 | ctrl - P10; ctrl - P11; ctrl - P3; ctrl - P8; P2 - P10; P2 - P11; P2 - P3; P2 - P8; P3 - P8                                |
| TC0600011171.hg.1 | TC0600011171.hg.1 | bysnoybu.aAug10-<br>unspliced   | bysnoybu      | NA     | 18.66 | 2.75 | 4.56 | 3.69 | ctrl - P10; ctrl - P11; ctrl - P3; ctrl - P8; P11 - P10; P2 - P10; P2 - P11; P11 - P3; P11 - P8; P2 - P3; P2 - P8; P3 - P8 |
| TC1700007095.hg.1 | TC1700007095.hg.1 | NM_001130090                    | DRC3          | 83450  | 18.64 | 2.76 | 4.55 | 3.70 | ctrl - P10; ctrl - P2; ctrl - P3; ctrl - P8; P11 - P10; P10 - P3; P11 - P2; P11 - P3; P11 - P8; P2 - P3; P2 - P8; P3 - P8  |
| TC2000012253.hg.1 | TC2000012253.hg.1 | uc061icv.1                      | RNU6-577P     | NA     | 18.64 | 2.76 | 4.55 | 3.70 | ctrl - P10; ctrl - P11; ctrl - P3; ctrl - P8; P11 - P10; P2 - P10; P3 - P10; P2 - P11; P11 - P8; P2 - P3; P2 - P8; P3 - P8 |
| TC1000009714.hg.1 | TC1000009714.hg.1 | NM_001242413                    | PRKCQ         | 5588   | 18.57 | 2.82 | 4.55 | 3.77 | ctrl - P10; ctrl - P2; ctrl - P3; ctrl - P8; P11 - P10; P2 - P10; P3 - P10; P11 - P2; P11 - P8; P2 - P8; P3 - P8           |
| TC1100010270.hg.1 | TC1100010270.hg.1 | ENST00000538408                 | RP11-613F22.6 | NA     | 18.56 | 2.83 | 4.54 | 3.78 | ctrl - P10; ctrl - P11; ctrl - P3; ctrl - P8; P11 - P10; P2 - P10; P2 - P11; P11 - P8; P2 - P3; P2 - P8                    |
| TC0700012616.hg.1 | TC0700012616.hg.1 | flybler.aAug10-<br>unspliced    | flybler       | NA     | 18.53 | 2.85 | 4.54 | 3.81 | ctrl - P10; ctrl - P11; ctrl - P8; P10 - P11; P2 - P10; P3 - P10; P10 - P8; P2 - P11; P3 - P11; P2 - P8; P3 - P8           |
| TC0100013551.hg.1 | TC0100013551.hg.1 | gleeplo.aAug10-<br>unspliced    | gleeplo       | NA     | 18.51 | 2.87 | 4.54 | 3.84 | ctrl - P10; ctrl - P11; ctrl - P3; ctrl - P8; P2 - P10; P2 - P11; P2 - P3; P2 - P8; P3 - P8                                |
| TC0200015877.hg.1 | TC0200015877.hg.1 | verdee.aAug10-<br>unspliced     | verdee        | NA     | 18.50 | 2.87 | 4.54 | 3.84 | P2 - ctrl; P3 - ctrl; P2 - P10; P3 - P10; P2 - P11; P3 - P11; P3 - P2; P2 - P8; P3 - P8                                    |
| TC1000008720.hg.1 | TC1000008720.hg.1 | pykleebu.aAug10-<br>unspliced   | pykleebu      | NA     | 18.42 | 2.94 | 4.53 | 3.93 | ctrl - P10; ctrl - P11; ctrl - P8; P2 - P10; P3 - P10; P2 - P11; P11 - P8; P2 - P3; P2 - P8; P3 - P8                       |
| TC1400008411.hg.1 | TC1400008411.hg.1 | ENST00000602827.1               | RP11-73M18.6  |        | 18.42 | 2.94 | 4.53 | 3.93 | ctrl - P10; ctrl - P11; ctrl - P3; ctrl - P8; P2 - P10; P2 - P11; P3 - P11; P2 - P3; P2 - P8; P3 - P8                      |
| TC0200015316.hg.1 | TC0200015316.hg.1 | sihomo.aAug10-<br>unspliced     | sihomo        | NA     | 18.4  | 2.96 | 4.52 | 3.95 | ctrl - P10; ctrl - P11; ctrl - P3; ctrl - P8; P11 - P10; P2 - P10; P3 - P10; P2 - P11; P11 - P8; P2 - P3; P2 - P8; P3 - P8 |
| TC0X00008877.hg.1 | TC0X00008877.hg.1 | ENST00000408676                 | MIR1184-3     | 1E+08  | 18.37 | 2.98 | 4.52 | 3.97 | P10 - ctrl; P11 - ctrl; ctrl - P2; P8 - ctrl; P10 - P2; P10 - P3; P11 - P2; P11 - P3; P3 - P2; P8 - P2; P8 - P3            |
| TC0100014206.hg.1 | TC0100014206.hg.1 | chaplo.aAug10-<br>unspliced     | chaplo        | NA     | 18.37 | 2.98 | 4.52 | 3.97 | ctrl - P10; P2 - ctrl; ctrl - P3; ctrl - P8; P11 - P10; P2 - P10; P2 - P11; P11 - P8; P2 - P3; P2 - P8                     |
| TC0400007881.hg.1 | TC0400007881.hg.1 | klustybu.aAug10-<br>unspliced   | klustybu      | NA     | 18.36 | 2.99 | 4.52 | 3.99 | ctrl - P10; ctrl - P11; ctrl - P3; ctrl - P8; P2 - P10; P3 - P10; P2 - P11; P3 - P11; P2 - P8; P3 - P8                     |
| TC0200011668.hg.1 | TC0200011668.hg.1 | ENST00000569008.1               | RP11-434B12.1 |        | 18.2  | 2.99 | 4.52 | 3.99 | ctrl - P10; ctrl - P11; ctrl - P3; ctrl - P8; P11 - P10; P2 - P10; P11 - P3; P11 - P8; P2 - P3; P2 - P8                    |
| TC1000009279.hg.1 | TC1000009279.hg.1 | steeruby.aAug10-<br>unspliced   | steeruby      | NA     | 18.28 | 3.06 | 4.51 | 4.07 | ctrl - P10; ctrl - P11; ctrl - P3; ctrl - P8; P2 - P10; P10 - P8; P2 - P11; P11 - P8; P2 - P3; P2 - P8; P3 - P8            |
| TC0900007814.hg.1 | TC0900007814.hg.1 | vorteyby.aAug10-<br>unspliced   | vorteyby      | NA     | 18.26 | 3.08 | 4.51 | 4.09 | ctrl - P10; ctrl - P11; ctrl - P3; ctrl - P8; P2 - P10; P2 - P11; P11 - P8; P2 - P3; P2 - P8                               |
| TC0400010129.hg.1 | TC0400010129.hg.1 | NA                              | NA            | NA     | 18.24 | 3.10 | 4.50 | 4.12 | ctrl - P10; ctrl - P11; ctrl - P3; ctrl - P8; P11 - P10; P2 - P10; P2 - P11; P11 - P8; P2 - P3; P2 - P8; P3 - P8           |
| TC0400008025.hg.1 | TC0400008025.hg.1 | NR_015359                       | WDFY3-AS2     | 404201 | 18.19 | 3.13 | 4.50 | 4.16 | ctrl - P10; ctrl - P2; ctrl - P3; ctrl - P8; P11 - P10; P2 - P10; P11 - P3; P11 - P8; P2 - P3; P2 - P8                     |
| TC0100007366.hg.1 | TC0100007366.hg.1 | jawrubu.aAug10-<br>unspliced    | jawrubu       | NA     | 18.16 | 3.16 | 4.50 | 4.20 | ctrl - P10; ctrl - P11; ctrl - P3; ctrl - P8; P2 - P10; P3 - P10; P2 - P11; P3 - P11; P2 - P3; P2 - P8; P3 - P8            |

|                      |                   |                                 |               |        |            |              |            |              |                                                                                                                            |
|----------------------|-------------------|---------------------------------|---------------|--------|------------|--------------|------------|--------------|----------------------------------------------------------------------------------------------------------------------------|
| TC1500007794.hg.1    | TC1500007794.hg.1 | chaper.aAug10-<br>unspliced     | chaper        | NA     | 18.15<br>5 | 3.17<br>E-05 | 4.49<br>87 | 4.21<br>E-05 | ctrl - P10; ctrl - P11; ctrl - P3; ctrl - P8; P2 - P10; P2 - P11; P2 - P3; P2 - P8; P3 - P8                                |
| TC1300008085.hg.1    | TC1300008085.hg.1 | shupa.aAug10-<br>unspliced      | shupa         | NA     | 18.15<br>3 | 3.17<br>E-05 | 4.49<br>84 | 4.21<br>E-05 | ctrl - P10; ctrl - P11; ctrl - P3; ctrl - P8; P10 - P11; P2 - P10; P10 - P3; P10 - P8; P2 - P11; P2 - P3; P2 - P8          |
| TC0700007850.hg.1    | TC0700007850.hg.1 | NA                              | NA            | NA     | 18.07<br>9 | 3.24<br>E-05 | 4.48<br>93 | 4.30<br>E-05 | P10 - ctrl; P11 - ctrl; P3 - ctrl; P8 - ctrl; P10 - P2; P10 - P3; P11 - P2; P11 - P3; P3 - P2; P8 - P2                     |
| TC0800011413.hg.1    | TC0800011413.hg.1 | NA                              | NA            | NA     | 18.06<br>2 | 3.26<br>E-05 | 4.48<br>72 | 4.32<br>E-05 | ctrl - P10; P2 - ctrl; ctrl - P3; ctrl - P8; P11 - P10; P2 - P10; P10 - P8; P11 - P3; P11 - P8; P2 - P3; P2 - P8; P3 - P8  |
| TC0600007112.hg.1    | TC0600007112.hg.1 | NR_030312                       | MIR548A1      | 693125 | 18.00<br>1 | 3.31<br>E-05 | 4.47<br>97 | 4.39<br>E-05 | P10 - ctrl; P2 - ctrl; P3 - ctrl; P8 - ctrl; P10 - P11; P10 - P2; P10 - P8; P2 - P11; P3 - P11; P8 - P11; P3 - P2; P3 - P8 |
| TC0200011267.hg.1    | TC0200011267.hg.1 | mihi.aAug10-<br>unspliced       | mihi          | NA     | 17.99<br>1 | 3.32<br>E-05 | 4.47<br>83 | 4.40<br>E-05 | ctrl - P10; ctrl - P11; ctrl - P3; ctrl - P8; P11 - P10; P2 - P10; P3 - P10; P2 - P11; P11 - P8; P2 - P8; P3 - P8          |
| TC1200007457.hg.1    | TC1200007457.hg.1 | smorflu.aAug10-<br>unspliced    | smorflu       | NA     | 17.95<br>9 | 3.35<br>E-05 | 4.47<br>44 | 4.44<br>E-05 | ctrl - P10; P2 - ctrl; ctrl - P8; P11 - P10; P2 - P10; P3 - P10; P2 - P11; P11 - P8; P2 - P3; P2 - P8; P3 - P8             |
| TC0700007058.hg.1    | TC0700007058.hg.1 | NR_036482                       | DPY19L2P3     | 442524 | 17.95<br>5 | 3.36<br>E-05 | 4.47<br>33 | 4.45<br>E-05 | ctrl - P10; ctrl - P3; ctrl - P8; P11 - P10; P2 - P10; P11 - P3; P11 - P8; P2 - P3; P2 - P8                                |
| TC0100011700.hg.1    | TC0100011700.hg.1 | jernobu.aAug10-<br>unspliced    | jernobu       | NA     | 17.94<br>7 | 3.37<br>E-05 | 4.47<br>29 | 4.45<br>E-05 | ctrl - P10; ctrl - P11; P2 - ctrl; ctrl - P8; P2 - P10; P2 - P11; P11 - P8; P2 - P3; P2 - P8; P3 - P8                      |
| TC0X00010780.hg.1    | TC0X00010780.hg.1 | studo.aAug10-<br>unspliced      | studo         | NA     | 17.90<br>4 | 3.41<br>E-05 | 4.46<br>76 | 4.50<br>E-05 | ctrl - P10; ctrl - P11; P2 - ctrl; ctrl - P8; P2 - P10; P3 - P10; P2 - P11; P3 - P11; P2 - P3; P2 - P8; P3 - P8            |
| TC2000008984.hg.1    | TC2000008984.hg.1 | jyseebu.aAug10-<br>unspliced    | jyseebu       | NA     | 17.90<br>2 | 3.41<br>E-05 | 4.46<br>73 | 4.50<br>E-05 | ctrl - P10; ctrl - P11; ctrl - P3; ctrl - P8; P2 - P10; P2 - P11; P2 - P3; P2 - P8                                         |
| TC0600006796.hg.1    | TC0600006796.hg.1 | dorjoy.aAug10-<br>unspliced     | dorjoy        | NA     | 17.9<br>9  | 3.41<br>E-05 | 4.46<br>7  | 4.50<br>E-05 | ctrl - P10; ctrl - P11; ctrl - P3; ctrl - P8; P2 - P10; P2 - P11; P2 - P3; P2 - P8; P3 - P8                                |
| TC1100007248.hg.1    | TC1100007248.hg.1 | spoymaw.aAug10-<br>unspliced    | spoymaw       | NA     | 17.87<br>2 | 3.44<br>E-05 | 4.46<br>36 | 4.53<br>E-05 | ctrl - P10; ctrl - P11; ctrl - P3; ctrl - P8; P10 - P11; P2 - P10; P10 - P8; P2 - P11; P3 - P11; P2 - P3; P2 - P8          |
| TC0200015397.hg.1    | TC0200015397.hg.1 | NM_001162407                    | CLK1          | 1195   | 17.86<br>9 | 3.44<br>E-05 | 4.46<br>31 | 4.54<br>E-05 | ctrl - P10; ctrl - P2; ctrl - P3; ctrl - P8; P11 - P10; P2 - P10; P11 - P3; P11 - P8; P2 - P3; P2 - P8                     |
| TC1400010335.hg.1    | TC1400010335.hg.1 | sworshubu.aAug10-<br>unspliced  | sworshubu     | NA     | 17.85<br>5 | 3.46<br>E-05 | 4.46<br>09 | 4.56<br>E-05 | ctrl - P10; ctrl - P11; ctrl - P3; ctrl - P8; P2 - P10; P3 - P10; P2 - P11; P11 - P8; P2 - P3; P2 - P8; P3 - P8            |
| TC1300008555.hg.1    | TC1300008555.hg.1 | goyvawby.aAug10-<br>unspliced   | goyvawby      | NA     | 17.82<br>4 | 3.49<br>E-05 | 4.45<br>76 | 4.59<br>E-05 | ctrl - P10; ctrl - P11; ctrl - P3; ctrl - P8; P2 - P10; P2 - P11; P2 - P3; P2 - P8                                         |
| TC1900008256.hg.1    | TC1900008256.hg.1 | NA                              | NA            | NA     | 17.79<br>5 | 3.52<br>E-05 | 4.45<br>39 | 4.63<br>E-05 | ctrl - P10; ctrl - P3; ctrl - P8; P11 - P10; P2 - P10; P2 - P11; P11 - P3; P11 - P8; P2 - P3; P2 - P8                      |
| TC1700008067.hg.1    | TC1700008067.hg.1 | ENST00000587960.1               | RP11-798G7.8  |        | 17.78<br>2 | 3.53<br>E-05 | 4.45<br>2  | 4.65<br>E-05 | ctrl - P10; ctrl - P11; ctrl - P3; ctrl - P8; P11 - P10; P2 - P10; P3 - P10; P2 - P11; P11 - P8; P2 - P3; P2 - P8; P3 - P8 |
| TC1500009811.hg.1    | TC1500009811.hg.1 | veestee.aAug10-<br>unspliced    | veestee       | NA     | 17.71<br>2 | 3.60<br>E-05 | 4.44<br>35 | 4.73<br>E-05 | ctrl - P10; ctrl - P11; P2 - ctrl; ctrl - P3; ctrl - P8; P2 - P10; P10 - P8; P2 - P11; P2 - P3; P2 - P8; P3 - P8           |
| TC1800008897.hg.1    | TC1800008897.hg.1 | moni.aAug10-<br>unspliced       | moni          | NA     | 17.69<br>4 | 3.62<br>E-05 | 4.44<br>12 | 4.76<br>E-05 | ctrl - P10; ctrl - P11; ctrl - P3; ctrl - P8; P2 - P10; P10 - P8; P2 - P11; P2 - P3; P2 - P8                               |
| TC1800007419.hg.1    | TC1800007419.hg.1 | volo.aAug10-<br>unspliced       | volo          | NA     | 17.63<br>3 | 3.69<br>E-05 | 4.43<br>32 | 4.84<br>E-05 | ctrl - P10; ctrl - P11; ctrl - P3; ctrl - P8; P2 - P10; P2 - P11; P2 - P3; P2 - P8                                         |
| HTA2-pos-47424481_st | 23150857          | NA                              | NA            | NA     | 17.62<br>2 | 3.70<br>E-05 | 4.43<br>19 | 4.86<br>E-05 | ctrl - P10; ctrl - P11; ctrl - P3; ctrl - P8; P11 - P10; P2 - P10; P2 - P11; P2 - P3; P2 - P8                              |
| TC1400009030.hg.1    | TC1400009030.hg.1 | ENST00000557067.1               | CTD-2298J14.2 |        | 17.61<br>3 | 3.71<br>E-05 | 4.43<br>1  | 4.86<br>E-05 | ctrl - P10; ctrl - P3; ctrl - P8; P11 - P10; P2 - P10; P11 - P2; P11 - P3; P11 - P8; P2 - P3; P2 - P8                      |
| TC1800006905.hg.1    | TC1800006905.hg.1 | NM_001308231                    | CABYR         | 26256  | 17.61<br>1 | 3.71<br>E-05 | 4.43<br>07 | 4.86<br>E-05 | P10 - ctrl; P2 - ctrl; P3 - ctrl; P8 - ctrl; P10 - P11; P10 - P2; P2 - P11; P3 - P11; P8 - P11; P8 - P2; P8 - P3           |
| TC0100018367.hg.1    | TC0100018367.hg.1 | NM_000740                       | CHRM3         | 1131   | 17.60<br>8 | 3.71<br>E-05 | 4.43<br>04 | 4.86<br>E-05 | ctrl - P10; ctrl - P3; ctrl - P8; P11 - P10; P2 - P10; P3 - P10; P11 - P3; P11 - P8; P2 - P8; P3 - P8                      |
| TC1700012218.hg.1    | TC1700012218.hg.1 | NM_015077                       | SARM1         | 23098  | 17.59<br>9 | 3.72<br>E-05 | 4.42<br>93 | 4.87<br>E-05 | ctrl - P10; P11 - ctrl; ctrl - P2; ctrl - P8; P11 - P10; P3 - P10; P11 - P2; P11 - P3; P11 - P8; P3 - P8                   |
| TC0600007901.hg.1    | TC0600007901.hg.1 | sneykleebu.aAug10-<br>unspliced | sneykleebu    | NA     | 17.58<br>5 | 3.74<br>E-05 | 4.42<br>68 | 4.90<br>E-05 | ctrl - P10; ctrl - P11; ctrl - P8; P2 - P10; P3 - P10; P2 - P11; P3 - P11; P11 - P8; P2 - P3; P2 - P8; P3 - P8             |
| TC1200006452.hg.1    | TC1200006452.hg.1 | ENST00000408512                 | RNU4ATAC16P   | NA     | 17.55<br>8 | 3.77<br>E-05 | 4.42<br>41 | 4.93<br>E-05 | ctrl - P10; ctrl - P11; ctrl - P3; ctrl - P8; P2 - P10; P3 - P10; P2 - P11; P3 - P11; P2 - P3; P2 - P8                     |
| TC0700010898.hg.1    | TC0700010898.hg.1 | veeku.aAug10-<br>unspliced      | veeku         | NA     | 17.40<br>9 | 3.94<br>E-05 | 4.40<br>5  | 5.15<br>E-05 | ctrl - P10; ctrl - P11; ctrl - P3; ctrl - P8; P11 - P10; P2 - P10; P2 - P11; P11 - P8; P2 - P3; P2 - P8                    |
| TC1500009262.hg.1    | TC1500009262.hg.1 | hekiru.aAug10-<br>unspliced     | hekiru        | NA     | 17.40<br>2 | 3.94<br>E-05 | 4.40<br>42 | 5.15<br>E-05 | ctrl - P10; ctrl - P11; ctrl - P3; ctrl - P8; P2 - P10; P2 - P11; P11 - P8; P2 - P3; P2 - P8                               |
| TC0100018249.hg.1    | TC0100018249.hg.1 | NM_020978                       | AMY2B         | 280    | 17.39<br>5 | 3.95<br>E-05 | 4.40<br>32 | 5.16<br>E-05 | ctrl - P10; ctrl - P11; ctrl - P3; ctrl - P8; P2 - P10; P2 - P11; P11 - P3; P11 - P8; P2 - P3; P2 - P8                     |
| TC0100013500.hg.1    | TC0100013500.hg.1 | steypeybo.aAug10-<br>unspliced  | steypeybo     | NA     | 17.39<br>4 | 3.95<br>E-05 | 4.40<br>31 | 5.16<br>E-05 | ctrl - P10; ctrl - P11; ctrl - P3; ctrl - P8; P2 - P10; P2 - P11; P2 - P3; P2 - P8; P3 - P8                                |
| TC0800011541.hg.1    | TC0800011541.hg.1 | klarverby.aAug10-<br>unspliced  | klarverby     | NA     | 17.36<br>9 | 3.98<br>E-05 |            | 5.20<br>E-05 | ctrl - P10; ctrl - P11; P2 - ctrl; ctrl - P8; P2 - P10; P3 - P10; P2 - P11; P3 - P11; P11 - P8; P2 - P3; P2 - P8; P3 - P8  |
| TC0100008272.hg.1    | TC0100008272.hg.1 | snoboy.aAug10-<br>unspliced     | snoboy        | NA     | 17.35<br>1 | 4.00<br>E-05 | 4.39<br>77 | 5.22<br>E-05 | ctrl - P10; ctrl - P11; ctrl - P3; ctrl - P8; P2 - P10; P3 - P10; P2 - P11; P3 - P11; P2 - P3; P2 - P8; P3 - P8            |

|                      |                   |                                |                |          |            |              |            |              |                                                                                                                            |
|----------------------|-------------------|--------------------------------|----------------|----------|------------|--------------|------------|--------------|----------------------------------------------------------------------------------------------------------------------------|
| TC0600010132.hg.1    | TC0600010132.hg.1 | wusmoyby.aAug10-<br>unspliced  | wusmoyby       | NA       | 17.33<br>4 | 4.02<br>E-05 | 4.39<br>54 | 5.24<br>E-05 | ctrl - P10; ctrl - P11; ctrl - P3; ctrl - P8; P2 - P10; P3 - P10; P2 - P11; P11 - P8; P2 - P3; P2 - P8; P3 - P8            |
| TC1700008229.hg.1    | TC1700008229.hg.1 | smyslee.aAug10-<br>unspliced   | smyslee        | NA       | 17.30<br>5 | 4.06<br>E-05 | 4.39<br>17 | 5.29<br>E-05 | ctrl - P10; ctrl - P11; ctrl - P8; P2 - P10; P3 - P10; P2 - P11; P3 - P11; P3 - P2; P2 - P8; P3 - P8                       |
| TC0300006720.hg.1    | TC0300006720.hg.1 | NA                             | NA             | NA       | 17.30<br>2 | 4.06<br>E-05 | 4.39<br>14 | 5.29<br>E-05 | ctrl - P10; ctrl - P2; ctrl - P3; ctrl - P8; P11 - P10; P2 - P10; P11 - P2; P11 - P3; P11 - P8; P2 - P3                    |
| TC0300013113.hg.1    | TC0300013113.hg.1 | borkybu.aAug10-<br>unspliced   | borkybu        | NA       | 17.29<br>8 | 4.07<br>E-05 | 4.39<br>08 | 5.29<br>E-05 | ctrl - P10; ctrl - P11; P2 - ctrl; P3 - ctrl; ctrl - P8; P2 - P10; P3 - P10; P2 - P11; P3 - P11; P2 - P8; P3 - P8          |
| TC0300006943.hg.1    | TC0300006943.hg.1 | sworjeebo.aAug10-<br>unspliced | sworjeebo      | NA       | 17.25<br>1 | 4.12<br>E-05 | 4.38<br>48 | 5.36<br>E-05 | ctrl - P10; ctrl - P11; ctrl - P3; ctrl - P8; P2 - P10; P10 - P8; P2 - P11; P11 - P8; P2 - P3; P2 - P8; P3 - P8            |
| TC0800011538.hg.1    | TC0800011538.hg.1 | klyverby.aAug10-<br>unspliced  | klyverby       | NA       | 17.20<br>6 | 4.18<br>E-05 | 4.37<br>9  | 5.43<br>E-05 | ctrl - P10; ctrl - P11; P2 - ctrl; ctrl - P8; P2 - P10; P2 - P11; P11 - P8; P2 - P3; P2 - P8; P3 - P8                      |
| TC1300006758.hg.1    | TC1300006758.hg.1 | NA                             | NA             | NA       | 17.19<br>6 | 4.19<br>E-05 | 4.37<br>78 | 5.45<br>E-05 | ctrl - P10; ctrl - P11; ctrl - P3; ctrl - P8; P2 - P10; P3 - P10; P2 - P11; P2 - P3; P2 - P8                               |
| TC1200007898.hg.1    | TC1200007898.hg.1 | NA                             | NA             | NA       | 17.18<br>1 | 4.21<br>E-05 | 4.37<br>58 | 5.47<br>E-05 | P10 - ctrl; P11 - ctrl; P8 - ctrl; P10 - P2; P10 - P3; P11 - P2; P11 - P3; P8 - P2; P8 - P3                                |
| TC0600013731.hg.1    | TC0600013731.hg.1 | beeflawby.aAug10-<br>unspliced | beeflawby      | NA       | 17.12<br>4 | 4.28<br>E-05 | 4.36<br>84 | 5.56<br>E-05 | ctrl - P10; ctrl - P11; ctrl - P8; P2 - P10; P3 - P10; P2 - P11; P3 - P11; P2 - P8; P3 - P8                                |
| TC0200016511.hg.1    | TC0200016511.hg.1 | NM_000577                      | IL1RN          | 3557     | 17.09<br>9 | 4.31<br>E-05 | 4.36<br>51 | 5.60<br>E-05 | P10 - ctrl; P3 - ctrl; P8 - ctrl; P10 - P11; P10 - P2; P8 - P10; P8 - P11; P3 - P2; P8 - P2; P8 - P3                       |
| TC1100007235.hg.1    | TC1100007235.hg.1 | NA                             | NA             | NA       | 17.09<br>9 | 4.32<br>E-05 | 4.36<br>41 | 5.61<br>E-05 | P10 - ctrl; P11 - ctrl; P3 - ctrl; P8 - ctrl; P10 - P2; P11 - P2; P3 - P2; P8 - P2                                         |
| TC0500011650.hg.1    | TC0500011650.hg.1 | chawsloby.aAug10-<br>unspliced | chawsloby      | NA       | 17.06<br>1 | 4.36<br>E-05 | 4.36<br>02 | 5.66<br>E-05 | ctrl - P11; P2 - ctrl; ctrl - P8; P10 - P11; P2 - P10; P3 - P10; P10 - P8; P2 - P11; P3 - P11; P2 - P3; P2 - P8; P3 - P8   |
| TC0X00007080.hg.1    | TC0X00007080.hg.1 | uc064ysa.1                     | AL138744.1     | NA       | 17.00<br>9 | 4.43<br>E-05 | 4.35<br>35 | 5.74<br>E-05 | ctrl - P10; ctrl - P11; ctrl - P3; ctrl - P8; P2 - P10; P2 - P11; P2 - P3; P2 - P8                                         |
| TC0600009997.hg.1    | TC0600009997.hg.1 | barjey.aAug10-<br>unspliced    | barjey         | NA       | 16.98<br>9 | 4.47<br>E-05 | 4.34<br>97 | 5.79<br>E-05 | ctrl - P10; ctrl - P11; P2 - ctrl; ctrl - P8; P2 - P10; P10 - P8; P2 - P11; P3 - P11; P2 - P3; P2 - P8                     |
| TC1500009183.hg.1    | TC1500009183.hg.1 | flyzawbu.aAug10-<br>unspliced  | flyzawbu       | NA       | 16.96<br>3 | 4.49<br>E-05 | 4.34<br>75 | 5.81<br>E-05 | ctrl - P10; ctrl - P11; ctrl - P3; ctrl - P8; P2 - P10; P2 - P11; P2 - P3; P2 - P8                                         |
| TC0500011343.hg.1    | TC0500011343.hg.1 | blagey.aAug10                  | blagey         | NA       | 16.94<br>4 | 4.52<br>E-05 | 4.34<br>5  | 5.84<br>E-05 | P10 - ctrl; P2 - ctrl; P3 - ctrl; P8 - ctrl; P10 - P11; P2 - P11; P3 - P11; P8 - P11                                       |
| TC0600009145.hg.1    | TC0600009145.hg.1 | ENST00000444259.1              | RP5-1112D6.4   |          | 16.93<br>1 | 4.54<br>E-05 | 4.34<br>33 | 5.86<br>E-05 | ctrl - P10; ctrl - P11; ctrl - P8; P2 - P10; P3 - P10; P2 - P11; P3 - P11; P2 - P8; P3 - P8                                |
| TC0200014176.hg.1    | TC0200014176.hg.1 | NA                             | NA             | NA       | 16.92<br>4 | 4.55<br>E-05 | 4.34<br>23 | 5.87<br>E-05 | ctrl - P10; ctrl - P3; ctrl - P8; P11 - P10; P2 - P10; P3 - P10; P11 - P8; P2 - P8; P3 - P8                                |
| HTA2-neg-47419569_st | 23149578          | NA                             | NA             | NA       | 16.92<br>1 | 4.55<br>E-05 | 4.34<br>19 | 5.88<br>E-05 | ctrl - P10; ctrl - P11; ctrl - P3; ctrl - P8; P2 - P10; P10 - P8; P2 - P11; P11 - P8; P2 - P3; P2 - P8; P3 - P8            |
| TC0500010774.hg.1    | TC0500010774.hg.1 | NR_049869                      | MIR5687        | 1.01E+08 | 16.96<br>9 | 4.58<br>E-05 | 4.33<br>93 | 5.91<br>E-05 | ctrl - P10; ctrl - P11; P2 - ctrl; ctrl - P3; ctrl - P8; P2 - P10; P3 - P10; P2 - P11; P2 - P3; P2 - P8                    |
| TC1200012275.hg.1    | TC1200012275.hg.1 | zybly.aAug10-<br>unspliced     | zybly          | NA       | 16.87<br>6 | 4.61<br>E-05 | 4.33<br>61 | 5.95<br>E-05 | ctrl - P10; ctrl - P11; ctrl - P3; ctrl - P8; P2 - P10; P3 - P10; P2 - P11; P2 - P3; P2 - P8; P3 - P8                      |
| TC1200007552.hg.1    | TC1200007552.hg.1 | ENST00000547387.1              | RP11-386G11.10 |          | 16.86<br>2 | 4.63<br>E-05 | 4.33<br>42 | 5.97<br>E-05 | P10 - ctrl; P11 - ctrl; P3 - ctrl; P8 - ctrl; P10 - P11; P10 - P2; P11 - P2; P8 - P11; P3 - P2; P8 - P2                    |
| TC1700012361.hg.1    | TC1700012361.hg.1 | NM_001282540                   | CDRT1          | 374286   | 16.85<br>8 | 4.65<br>E-05 | 4.33<br>27 | 5.99<br>E-05 | ctrl - P11; P3 - ctrl; P8 - ctrl; P10 - P11; P10 - P2; P8 - P10; P3 - P11; P8 - P11; P3 - P2; P8 - P2                      |
| TC0300011412.hg.1    | TC0300011412.hg.1 | banarbo.aAug10-<br>unspliced   | banarbo        | NA       | 16.85<br>8 | 4.65<br>E-05 | 4.33<br>26 | 5.99<br>E-05 | ctrl - P10; ctrl - P11; ctrl - P3; ctrl - P8; P2 - P10; P2 - P11; P11 - P8; P2 - P3; P2 - P8; P3 - P8                      |
| TC0500010844.hg.1    | TC0500010844.hg.1 | juflu.aAug10-<br>unspliced     | juflu          | NA       | 16.84<br>3 | 4.66<br>E-05 | 4.33<br>18 | 6.00<br>E-05 | ctrl - P10; ctrl - P11; ctrl - P3; ctrl - P8; P11 - P10; P2 - P10; P3 - P10; P11 - P8; P2 - P8; P3 - P8                    |
| TC0700008851.hg.1    | TC0700008851.hg.1 | yukemu.aAug10-<br>unspliced    | yukemu         | NA       | 16.81<br>3 | 4.70<br>E-05 | 4.32<br>78 | 6.05<br>E-05 | P2 - ctrl; P3 - ctrl; ctrl - P8; P11 - P10; P2 - P10; P3 - P10; P2 - P11; P11 - P8; P2 - P3; P2 - P8; P3 - P8              |
| TC0500010846.hg.1    | TC0500010846.hg.1 | jawflu.aAug10-<br>unspliced    | jawflu         | NA       | 16.79<br>3 | 4.73<br>E-05 | 4.32<br>51 | 6.08<br>E-05 | ctrl - P10; ctrl - P3; ctrl - P8; P11 - P10; P2 - P10; P3 - P10; P11 - P8; P2 - P8; P3 - P8                                |
| TC0100007216.hg.1    | TC0100007216.hg.1 | nokumo.aAug10-<br>unspliced    | nokumo         | NA       | 16.74<br>1 | 4.80<br>E-05 | 4.31<br>83 | 6.18<br>E-05 | ctrl - P10; P2 - ctrl; ctrl - P3; ctrl - P8; P11 - P10; P2 - P10; P2 - P11; P11 - P3; P11 - P8; P2 - P3; P2 - P8           |
| TC0100017311.hg.1    | TC0100017311.hg.1 | rerrerbo.aAug10-<br>unspliced  | rerrerbo       | NA       | 16.69<br>8 | 4.87<br>E-05 | 4.31<br>26 | 6.26<br>E-05 | ctrl - P10; ctrl - P2; ctrl - P3; ctrl - P8; P11 - P10; P2 - P10; P11 - P3; P11 - P8; P2 - P3; P2 - P8                     |
| TC0X00006816.hg.1    | TC0X00006816.hg.1 | NM_001142386                   | PKD3           | 5165     | 16.69<br>3 | 4.88<br>E-05 | 4.31<br>2  | 6.26<br>E-05 | ctrl - P10; ctrl - P2; ctrl - P8; P11 - P10; P2 - P10; P3 - P10; P11 - P2; P11 - P8; P3 - P2; P3 - P8                      |
| TC0800007316.hg.1    | TC0800007316.hg.1 | NM_004095                      | EIF4EBP1       | 1978     | 16.58<br>5 | 5.05<br>E-05 | 4.29<br>7  | 6.48<br>E-05 | P10 - ctrl; P11 - ctrl; P3 - ctrl; P8 - ctrl; P11 - P10; P10 - P2; P8 - P10; P11 - P2; P11 - P3; P3 - P2; P8 - P2; P8 - P3 |
| TC1500009205.hg.1    | TC1500009205.hg.1 | skoysu.aAug10-<br>unspliced    | skoysu         | NA       | 16.42<br>4 | 5.30<br>E-05 | 4.27<br>61 | 6.79<br>E-05 | ctrl - P10; ctrl - P11; ctrl - P3; ctrl - P8; P2 - P10; P10 - P8; P2 - P11; P11 - P8; P2 - P8; P3 - P8                     |
| TC0500011032.hg.1    | TC0500011032.hg.1 | rani.aAug10-<br>unspliced      | rani           | NA       | 16.41<br>4 | 5.31<br>E-05 | 4.27<br>48 | 6.81<br>E-05 | ctrl - P10; ctrl - P11; ctrl - P3; ctrl - P8; P11 - P10; P2 - P10; P2 - P11; P11 - P8; P2 - P3; P2 - P8; P3 - P8           |
| TC1200007716.hg.1    | TC1200007716.hg.1 | veyjoyby.aAug10-<br>unspliced  | veyjoyby       | NA       | 16.41<br>2 | 5.32<br>E-05 | 4.27<br>45 | 6.81<br>E-05 | ctrl - P10; ctrl - P11; ctrl - P3; ctrl - P8; P2 - P10; P2 - P11; P11 - P8; P2 - P3; P2 - P8; P3 - P8                      |

|                   |                   |                                |               |          |                |              |            |              |                                                                                                                    |
|-------------------|-------------------|--------------------------------|---------------|----------|----------------|--------------|------------|--------------|--------------------------------------------------------------------------------------------------------------------|
| TC0800010265.hg.1 | TC0800010265.hg.1 | glerkor.aAug10-<br>unspliced   | glerkor       | NA       | 16.<br>41<br>1 | 5.32<br>E-05 | 4.27<br>43 | 6.81<br>E-05 | ctrl - P10; ctrl - P11; P2 - ctrl; ctrl - P8; P2 - P10; P2 - P11; P11 - P8; P2 - P3; P2 - P8; P3 - P8              |
| TC1100007461.hg.1 | TC1100007461.hg.1 | hsa_circ_0000297               | ARHGAP1       | NA       | 16.<br>37<br>2 | 5.38<br>E-05 | 4.26<br>9  | 6.89<br>E-05 | P10 - ctrl; P11 - ctrl; P2 - ctrl; P3 - ctrl; P8 - ctrl; P10 - P11; P10 - P2; P10 - P3; P11 - P2; P8 - P2; P8 - P3 |
| TC1800006632.hg.1 | TC1800006632.hg.1 | ENST00000609701.1              | RP11-888D10.4 |          | 16.<br>34<br>2 | 5.43<br>E-05 | 4.26<br>51 | 6.95<br>E-05 | ctrl - P10; ctrl - P11; ctrl - P3; ctrl - P8; P11 - P10; P2 - P10; P3 - P10; P2 - P11; P11 - P8; P2 - P3; P2 - P8  |
| TC0900011287.hg.1 | TC0900011287.hg.1 | NA                             | NA            | NA       | 16.<br>34<br>1 | 5.44<br>E-05 | 4.26<br>48 | 6.95<br>E-05 | ctrl - P10; ctrl - P11; ctrl - P3; ctrl - P8; P11 - P10; P2 - P10; P11 - P8; P2 - P3; P2 - P8                      |
| TC1700010948.hg.1 | TC1700010948.hg.1 | NA                             | NA            | NA       | 16.<br>33<br>1 | 5.45<br>E-05 | 4.26<br>36 | 6.97<br>E-05 | ctrl - P10; P2 - ctrl; ctrl - P3; ctrl - P8; P11 - P10; P2 - P10; P2 - P11; P11 - P3; P11 - P8; P2 - P3; P2 - P8   |
| TC1200006506.hg.1 | TC1200006506.hg.1 | NA                             | NA            | NA       | 16.<br>31<br>7 | 5.47<br>E-05 | 4.26<br>17 | 6.99<br>E-05 | ctrl - P10; ctrl - P3; ctrl - P8; P11 - P10; P2 - P10; P11 - P3; P11 - P8; P2 - P3; P2 - P8                        |
| TC1400008696.hg.1 | TC1400008696.hg.1 | glorslu.aAug10-<br>unspliced   | glorslu       | NA       | 16.<br>26<br>1 | 5.57<br>E-05 | 4.25<br>4  | 7.11<br>E-05 | ctrl - P10; ctrl - P11; ctrl - P3; ctrl - P8; P2 - P10; P3 - P10; P2 - P11; P2 - P3; P2 - P8; P3 - P8              |
| TC0300011204.hg.1 | TC0300011204.hg.1 | bomoybo.aAug10-<br>unspliced   | bomoybo       | NA       | 16.<br>23<br>7 | 5.61<br>E-05 | 4.25<br>1  | 7.16<br>E-05 | ctrl - P10; ctrl - P11; ctrl - P8; P11 - P10; P2 - P10; P3 - P10; P2 - P11; P2 - P8; P3 - P8                       |
| TC0600011974.hg.1 | TC0600011974.hg.1 | slaglawby.aAug10-<br>unspliced | slaglawby     | NA       | 16.<br>17<br>1 | 5.73<br>E-05 | 4.24<br>2  | 7.31<br>E-05 | P2 - ctrl; P3 - ctrl; P10 - P11; P2 - P10; P3 - P10; P2 - P11; P3 - P11; P8 - P11; P2 - P8; P3 - P8                |
| TC0200013801.hg.1 | TC0200013801.hg.1 | NR_131251                      | LINC01594     | 1.03E+08 | 16.<br>15<br>1 | 5.77<br>E-05 | 4.23<br>92 | 7.35<br>E-05 | ctrl - P10; ctrl - P3; ctrl - P8; P11 - P10; P2 - P10; P3 - P10; P11 - P3; P11 - P8; P2 - P8; P3 - P8              |
| TC0200010126.hg.1 | TC0200010126.hg.1 | geydoy.vcAug10-<br>unspliced   | geydoy        | NA       | 16.<br>14<br>6 | 5.77<br>E-05 | 4.23<br>85 | 7.36<br>E-05 | ctrl - P10; ctrl - P3; ctrl - P8; P11 - P10; P2 - P10; P2 - P11; P11 - P8; P2 - P3; P2 - P8; P3 - P8               |
| TC0100011365.hg.1 | TC0100011365.hg.1 | NA                             | NA            | NA       | 16.<br>11<br>9 | 5.82<br>E-05 | 4.23<br>48 | 7.42<br>E-05 | ctrl - P10; ctrl - P11; ctrl - P8; P2 - P10; P3 - P10; P2 - P11; P3 - P11; P2 - P3; P2 - P8; P3 - P8               |
| TC1100010404.hg.1 | TC1100010404.hg.1 | serlaby.aAug10-<br>unspliced   | serlaby       | NA       | 16.<br>11<br>7 | 5.83<br>E-05 | 4.23<br>46 | 7.42<br>E-05 | ctrl - P10; ctrl - P11; ctrl - P3; ctrl - P8; P2 - P10; P10 - P8; P2 - P11; P11 - P8; P2 - P3; P2 - P8; P3 - P8    |
| TC1100009808.hg.1 | TC1100009808.hg.1 | NR_002728                      | KCNQ1OT1      | 11p15    | 16.<br>06<br>1 | 5.92<br>E-05 | 4.22<br>77 | 7.53<br>E-05 | ctrl - P10; ctrl - P11; ctrl - P3; ctrl - P8; P2 - P10; P10 - P8; P2 - P11; P2 - P3; P2 - P8                       |
| TC1000008357.hg.1 | TC1000008357.hg.1 | smorsho.aAug10-<br>unspliced   | smorsho       | NA       | 16.<br>03<br>5 | 5.98<br>E-05 | 4.22<br>34 | 7.60<br>E-05 | ctrl - P10; ctrl - P11; ctrl - P8; P11 - P10; P2 - P10; P3 - P10; P2 - P11; P3 - P11; P2 - P8; P3 - P8             |
| TC1100009293.hg.1 | TC1100009293.hg.1 | ENST00000621414                | 7SK           |          | 15.<br>96<br>6 | 6.11<br>E-05 | 4.21<br>4  | 7.77<br>E-05 | ctrl - P10; ctrl - P11; ctrl - P8; P11 - P10; P2 - P10; P3 - P10; P2 - P11; P11 - P8; P2 - P3; P2 - P8; P3 - P8    |
| TC0200010732.hg.1 | TC0200010732.hg.1 | starswyby.aAug10-<br>unspliced | starswyby     | NA       | 15.<br>96<br>2 | 6.12<br>E-05 | 4.21<br>34 | 7.77<br>E-05 | ctrl - P10; ctrl - P11; ctrl - P8; P2 - P10; P3 - P10; P10 - P8; P2 - P11; P3 - P11; P11 - P8; P2 - P8; P3 - P8    |
| TC2100007090.hg.1 | TC2100007090.hg.1 | NA                             | NA            | NA       | 15.<br>93<br>4 | 6.17<br>E-05 | 4.20<br>95 | 7.84<br>E-05 | ctrl - P10; ctrl - P11; ctrl - P3; ctrl - P8; P2 - P10; P2 - P11; P11 - P8; P2 - P3; P2 - P8                       |
| TC1200009218.hg.1 | TC1200009218.hg.1 | woytybo.aAug10                 | woytybo       | NA       | 15.<br>93<br>2 | 6.18<br>E-05 | 4.20<br>93 | 7.84<br>E-05 | ctrl - P10; ctrl - P11; ctrl - P3; ctrl - P8; P2 - P10; P2 - P11; P2 - P3; P2 - P8; P3 - P8                        |
| TC0300007402.hg.1 | TC0300007402.hg.1 | sharglee.aAug10-<br>unspliced  | sharglee      | NA       | 15.<br>91<br>6 | 6.21<br>E-05 | 4.20<br>7  | 7.88<br>E-05 | ctrl - P10; ctrl - P11; ctrl - P3; ctrl - P8; P2 - P10; P3 - P10; P2 - P11; P11 - P8; P2 - P3; P2 - P8; P3 - P8    |
| TC1500007381.hg.1 | TC1500007381.hg.1 | woysto.aAug10-<br>unspliced    | woysto        | NA       | 15.<br>91<br>1 | 6.22<br>E-05 | 4.20<br>64 | 7.88<br>E-05 | ctrl - P10; ctrl - P11; ctrl - P8; P2 - P10; P3 - P10; P2 - P11; P3 - P11; P2 - P3; P2 - P8; P3 - P8               |
| TC2000006765.hg.1 | TC2000006765.hg.1 | swoygar.aAug10-<br>unspliced   | swoygar       | NA       | 15.<br>90<br>5 | 6.23<br>E-05 | 4.20<br>55 | 7.89<br>E-05 | ctrl - P10; ctrl - P3; ctrl - P8; P11 - P10; P2 - P10; P11 - P3; P11 - P8; P2 - P3; P2 - P8                        |
| TC0800011986.hg.1 | TC0800011986.hg.1 | deylu.aAug10-<br>unspliced     | deylu         | NA       | 15.<br>87<br>6 | 6.29<br>E-05 | 4.20<br>15 | 7.96<br>E-05 | P2 - ctrl; P2 - P10; P3 - P10; P2 - P11; P3 - P11; P2 - P3; P2 - P8; P3 - P8                                       |
| TC1600009622.hg.1 | TC1600009622.hg.1 | NA                             | NA            | NA       | 15.<br>86<br>4 | 6.31<br>E-05 | 4.19<br>99 | 7.99<br>E-05 | ctrl - P10; ctrl - P11; ctrl - P3; ctrl - P8; P2 - P10; P2 - P11; P2 - P3; P2 - P8                                 |
| TC0300013423.hg.1 | TC0300013423.hg.1 | skawmeybu.aAug10-<br>unspliced | skawmeybu     | NA       | 15.<br>85<br>3 | 6.33<br>E-05 | 4.19<br>84 | 8.01<br>E-05 | ctrl - P10; ctrl - P11; ctrl - P3; ctrl - P8; P2 - P10; P2 - P11; P11 - P8; P2 - P3; P2 - P8; P3 - P8              |
| TC1700007346.hg.1 | TC1700007346.hg.1 | glarwee.aAug10-<br>unspliced   | glarwee       | NA       | 15.<br>82<br>6 | 6.39<br>E-05 | 4.19<br>47 | 8.08<br>E-05 | ctrl - P10; ctrl - P11; ctrl - P3; ctrl - P8; P2 - P10; P2 - P11; P2 - P3; P2 - P8; P3 - P8                        |
| TC1200008709.hg.1 | TC1200008709.hg.1 | bojeeby.aAug10-<br>unspliced   | bojeeby       | NA       | 15.<br>80<br>2 | 6.44<br>E-05 | 4.19<br>13 | 8.14<br>E-05 | ctrl - P10; ctrl - P11; ctrl - P8; P2 - P10; P3 - P10; P2 - P11; P11 - P8; P2 - P3; P2 - P8; P3 - P8               |
| TC0300012051.hg.1 | TC0300012051.hg.1 | nekeme.bAug10-<br>unspliced    | nekeme        | NA       | 15.<br>79<br>7 | 6.46<br>E-05 | 4.18<br>96 | 8.17<br>E-05 | ctrl - P10; ctrl - P11; ctrl - P8; P2 - P10; P3 - P10; P2 - P11; P3 - P11; P2 - P8; P3 - P8                        |
| TC0300007137.hg.1 | TC0300007137.hg.1 | keefawbo.aAug10-<br>unspliced  | keefawbo      | NA       | 15.<br>78<br>1 | 6.48<br>E-05 | 4.18<br>84 | 8.18<br>E-05 | ctrl - P10; ctrl - P11; ctrl - P3; ctrl - P8; P2 - P10; P3 - P10; P2 - P11; P2 - P3; P2 - P8; P3 - P8              |
| TC1200009548.hg.1 | TC1200009548.hg.1 | NR_120482                      | LOC102723544  | 1.03E+08 | 15.<br>76<br>7 | 6.53<br>E-05 | 4.18<br>54 | 8.24<br>E-05 | ctrl - P10; ctrl - P11; ctrl - P3; ctrl - P8; P11 - P10; P2 - P10; P11 - P3; P11 - P8; P2 - P3; P2 - P8; P3 - P8   |
| TC0200011196.hg.1 | TC0200011196.hg.1 | sluneebo.aAug10-<br>unspliced  | sluneebo      | NA       | 15.<br>74<br>9 | 6.55<br>E-05 | 4.18<br>4  | 8.26<br>E-05 | ctrl - P10; ctrl - P11; ctrl - P8; P11 - P10; P2 - P10; P3 - P10; P2 - P11; P11 - P8; P2 - P3; P2 - P8; P3 - P8    |
| TC1700008736.hg.1 | TC1700008736.hg.1 | NA                             | NA            | NA       | 15.<br>72<br>7 | 6.59<br>E-05 | 4.18<br>08 | 8.31<br>E-05 | ctrl - P10; ctrl - P8; P11 - P10; P2 - P10; P3 - P10; P11 - P8; P2 - P8; P3 - P8                                   |
| TC0900006544.hg.1 | TC0900006544.hg.1 | ENST00000428071                | MTATP6P11     | NA       | 15.<br>70<br>6 | 6.64<br>E-05 | 4.17<br>8  | 8.36<br>E-05 | ctrl - P10; P2 - ctrl; ctrl - P8; P11 - P10; P2 - P10; P3 - P10; P2 - P11; P11 - P8; P2 - P8; P3 - P8              |

|                   |                   |                                |               |          |            |              |            |              |                                                                                                                            |
|-------------------|-------------------|--------------------------------|---------------|----------|------------|--------------|------------|--------------|----------------------------------------------------------------------------------------------------------------------------|
| TC1200011593.hg.1 | TC1200011593.hg.1 | NA                             | NA            | NA       | 15.68<br>2 | 6.68<br>E-05 | 4.17<br>49 | 8.42<br>E-05 | ctrl - P10; ctrl - P11; ctrl - P3; ctrl - P8; P2 - P10; P2 - P11; P3 - P11; P2 - P3; P2 - P8; P3 - P8                      |
| TC1800006618.hg.1 | TC1800006618.hg.1 | flukey.aAug10-<br>unspliced    | flukey        | NA       | 15.67<br>6 | 6.70<br>E-05 | 4.17<br>37 | 8.44<br>E-05 | ctrl - P10; ctrl - P11; ctrl - P8; P2 - P10; P3 - P10; P2 - P11; P3 - P11; P2 - P8; P3 - P8                                |
| TC0300012246.hg.1 | TC0300012246.hg.1 | NA                             | NA            | NA       | 15.66<br>2 | 6.73<br>E-05 | 4.17<br>19 | 8.47<br>E-05 | ctrl - P10; ctrl - P11; ctrl - P3; ctrl - P8; P2 - P10; P3 - P10; P2 - P11; P2 - P3; P2 - P8; P3 - P8                      |
| TC2200008440.hg.1 | TC2200008440.hg.1 | ENST00000608952.1              | RP4-539M6.21  |          | 15.64<br>6 | 6.77<br>E-05 | 4.16<br>95 | 8.51<br>E-05 | ctrl - P10; ctrl - P3; ctrl - P8; P11 - P10; P2 - P10; P2 - P11; P11 - P8; P2 - P3; P2 - P8; P3 - P8                       |
| TC0200008003.hg.1 | TC0200008003.hg.1 | klorporbo.aAug10-<br>unspliced | klorporbo     | NA       | 15.64<br>2 | 6.78<br>E-05 | 4.16<br>9  | 8.52<br>E-05 | ctrl - P10; ctrl - P3; ctrl - P8; P11 - P10; P2 - P10; P2 - P11; P11 - P8; P2 - P3; P2 - P8                                |
| TC0100017636.hg.1 | TC0100017636.hg.1 | ENST00000362464                | RNA5S11       | 1E+08    | 15.61<br>2 | 6.84<br>E-05 | 4.16<br>48 | 8.58<br>E-05 | P11 - ctrl; P2 - ctrl; P3 - ctrl; P11 - P10; P2 - P10; P3 - P10; P2 - P11; P11 - P8; P2 - P3; P2 - P8; P3 - P8             |
| TC0100017637.hg.1 | TC0100017637.hg.1 | ENST00000362400                | RNA5S12       | 1E+08    | 15.61<br>2 | 6.84<br>E-05 | 4.16<br>48 | 8.58<br>E-05 | P11 - ctrl; P2 - ctrl; P3 - ctrl; P11 - P10; P2 - P10; P3 - P10; P2 - P11; P11 - P8; P2 - P3; P2 - P8; P3 - P8             |
| TC0100017638.hg.1 | TC0100017638.hg.1 | ENST00000365656                | RNA5S13       | 1E+08    | 15.61<br>2 | 6.84<br>E-05 | 4.16<br>48 | 8.58<br>E-05 | P11 - ctrl; P2 - ctrl; P3 - ctrl; P11 - P10; P2 - P10; P3 - P10; P2 - P11; P11 - P8; P2 - P3; P2 - P8; P3 - P8             |
| TC0100017639.hg.1 | TC0100017639.hg.1 | ENST00000364485                | RNA5S14       | 1E+08    | 15.61<br>2 | 6.84<br>E-05 | 4.16<br>48 | 8.58<br>E-05 | P11 - ctrl; P2 - ctrl; P3 - ctrl; P11 - P10; P2 - P10; P3 - P10; P2 - P11; P11 - P8; P2 - P3; P2 - P8; P3 - P8             |
| TC0100017640.hg.1 | TC0100017640.hg.1 | ENST00000365055                | RNA5S15       | 1E+08    | 15.61<br>2 | 6.84<br>E-05 | 4.16<br>48 | 8.58<br>E-05 | P11 - ctrl; P2 - ctrl; P3 - ctrl; P11 - P10; P2 - P10; P3 - P10; P2 - P11; P11 - P8; P2 - P3; P2 - P8; P3 - P8             |
| TC0100017641.hg.1 | TC0100017641.hg.1 | ENST00000365387                | RNA5S16       | 1E+08    | 15.61<br>2 | 6.84<br>E-05 | 4.16<br>48 | 8.58<br>E-05 | P11 - ctrl; P2 - ctrl; P3 - ctrl; P11 - P10; P2 - P10; P3 - P10; P2 - P11; P11 - P8; P2 - P3; P2 - P8; P3 - P8             |
| TC0100008644.hg.1 | TC0100008644.hg.1 | skernubu.aAug10-<br>unspliced  | skernubu      | NA       | 15.60<br>9 | 6.85<br>E-05 | 4.16<br>44 | 8.58<br>E-05 | ctrl - P10; ctrl - P11; ctrl - P3; ctrl - P8; P2 - P10; P2 - P11; P2 - P3; P2 - P8                                         |
| TC0100010515.hg.1 | TC0100010515.hg.1 | sloymabu.aAug10-<br>unspliced  | sloymabu      | NA       | 15.59<br>7 | 6.87<br>E-05 | 4.16<br>28 | 8.61<br>E-05 | ctrl - P10; ctrl - P11; P2 - ctrl; ctrl - P8; P2 - P10; P3 - P10; P2 - P11; P3 - P11; P2 - P3; P2 - P8; P3 - P8            |
| TC1100010689.hg.1 | TC1100010689.hg.1 | lucher.aAug10-<br>unspliced    | lucher        | NA       | 15.57<br>5 | 6.94<br>E-05 | 4.15<br>89 | 8.68<br>E-05 | ctrl - P10; ctrl - P11; ctrl - P3; ctrl - P8; P2 - P10; P2 - P11; P2 - P3; P2 - P8                                         |
| TC0100008520.hg.1 | TC0100008520.hg.1 | luzawbo.aAug10-<br>unspliced   | luzawbo       | NA       | 15.55<br>3 | 6.97<br>E-05 | 4.15<br>65 | 8.72<br>E-05 | ctrl - P10; P2 - ctrl; ctrl - P3; ctrl - P8; P11 - P10; P2 - P10; P2 - P11; P11 - P8; P2 - P3; P2 - P8                     |
| TC0200009861.hg.1 | TC0200009861.hg.1 | NR_110574                      | LOC101929633  | 1.02E+08 | 15.53<br>7 | 7.01<br>E-05 | 4.15<br>43 | 8.76<br>E-05 | ctrl - P10; ctrl - P3; ctrl - P8; P11 - P10; P2 - P10; P11 - P2; P11 - P3; P11 - P8; P2 - P3; P2 - P8                      |
| TC1200008728.hg.1 | TC1200008728.hg.1 | keeney.aAug10-<br>unspliced    | keeney        | NA       | 15.53<br>6 | 7.01<br>E-05 | 4.15<br>41 | 8.76<br>E-05 | ctrl - P10; ctrl - P3; ctrl - P8; P11 - P10; P2 - P10; P10 - P3; P11 - P3; P11 - P8; P2 - P3; P2 - P8                      |
| TC1200007013.hg.1 | TC1200007013.hg.1 | flafy.aAug10-<br>unspliced     | flafy         | NA       | 15.51<br>5 | 7.06<br>E-05 | 4.15<br>13 | 8.82<br>E-05 | ctrl - P10; ctrl - P11; ctrl - P8; P2 - P10; P3 - P10; P2 - P11; P3 - P11; P2 - P8; P3 - P8                                |
| TC0600012337.hg.1 | TC0600012337.hg.1 | NA                             | NA            | NA       | 15.51<br>1 | 7.07<br>E-05 | 4.15<br>07 | 8.82<br>E-05 | ctrl - P10; ctrl - P11; ctrl - P3; ctrl - P8; P2 - P10; P3 - P10; P2 - P11; P2 - P3; P2 - P8; P3 - P8                      |
| TC1500009637.hg.1 | TC1500009637.hg.1 | seyzo.aAug10-<br>unspliced     | seyzo         | NA       | 15.48<br>1 | 7.14<br>E-05 | 4.14<br>64 | 8.91<br>E-05 | ctrl - P11; ctrl - P8; P10 - P11; P10 - P8; P2 - P11; P3 - P11; P2 - P8; P3 - P8                                           |
| TC0200007083.hg.1 | TC0200007083.hg.1 | gukla.aAug10-<br>unspliced     | gukla         | NA       | 15.47<br>6 | 7.15<br>E-05 | 4.14<br>58 | 8.91<br>E-05 | ctrl - P10; ctrl - P8; P11 - P10; P2 - P10; P3 - P10; P11 - P8; P2 - P8; P3 - P8                                           |
| TC0600010134.hg.1 | TC0600010134.hg.1 | dawblor.aAug10-<br>unspliced   | dawblor       | NA       | 15.46<br>6 | 7.17<br>E-05 | 4.14<br>44 | 8.94<br>E-05 | ctrl - P10; ctrl - P11; ctrl - P3; ctrl - P8; P2 - P10; P2 - P11; P2 - P3; P2 - P8                                         |
| TC0500010064.hg.1 | TC0500010064.hg.1 | klerflu.aAug10-<br>unspliced   | klerflu       | NA       | 15.42<br>2 | 7.28<br>E-05 | 4.13<br>81 | 9.07<br>E-05 | ctrl - P10; ctrl - P11; ctrl - P3; ctrl - P8; P2 - P10; P2 - P11; P2 - P3; P2 - P8                                         |
| TC0400008065.hg.1 | TC0400008065.hg.1 | jugy.aAug10-<br>unspliced      | jugy          | NA       | 15.40<br>8 | 7.31<br>E-05 | 4.13<br>61 | 9.10<br>E-05 | ctrl - P10; ctrl - P11; ctrl - P3; ctrl - P8; P2 - P10; P2 - P11; P2 - P3; P2 - P8; P3 - P8                                |
| TC0100014028.hg.1 | TC0100014028.hg.1 | jeyrobo.aAug10-<br>unspliced   | jeyrobo       | NA       | 15.40<br>6 | 7.32<br>E-05 | 4.13<br>58 | 9.10<br>E-05 | ctrl - P10; ctrl - P11; P2 - ctrl; ctrl - P8; P11 - P10; P2 - P10; P3 - P10; P2 - P11; P11 - P8; P2 - P3; P2 - P8; P3 - P8 |
| TC0300007403.hg.1 | TC0300007403.hg.1 | shaforbo.aAug10-<br>unspliced  | shaforbo      | NA       | 15.39<br>3 | 7.35<br>E-05 | 4.13<br>4  | 9.14<br>E-05 | ctrl - P10; P2 - ctrl; ctrl - P3; ctrl - P8; P2 - P10; P2 - P11; P11 - P8; P2 - P3; P2 - P8                                |
| TC0900010043.hg.1 | TC0900010043.hg.1 | kamamu.bAug10-<br>unspliced    | kamamu        | NA       | 15.38<br>3 | 7.37<br>E-05 | 4.13<br>26 | 9.16<br>E-05 | ctrl - P10; ctrl - P11; ctrl - P8; P2 - P10; P3 - P10; P2 - P11; P3 - P11; P11 - P8; P2 - P8; P3 - P8                      |
| TC0200006526.hg.1 | TC0200006526.hg.1 | porlaw.aAug10-<br>unspliced    | porlaw        | NA       | 15.35<br>4 | 7.44<br>E-05 | 4.12<br>85 | 9.24<br>E-05 | ctrl - P10; ctrl - P11; ctrl - P3; ctrl - P8; P2 - P10; P2 - P11; P2 - P3; P2 - P8                                         |
| TC1200007649.hg.1 | TC1200007649.hg.1 | kuchu.aAug10-<br>unspliced     | kuchu         | NA       | 15.33<br>7 | 7.48<br>E-05 | 4.12<br>6  | 9.29<br>E-05 | ctrl - P10; ctrl - P11; ctrl - P3; ctrl - P8; P11 - P10; P2 - P10; P3 - P10; P2 - P11; P11 - P8; P2 - P3; P2 - P8; P3 - P8 |
| TC2100006637.hg.1 | TC2100006637.hg.1 | seygor.aAug10-<br>unspliced    | seygor        | NA       | 15.33<br>2 | 7.49<br>E-05 | 4.12<br>53 | 9.30<br>E-05 | ctrl - P10; ctrl - P11; ctrl - P3; ctrl - P8; P2 - P10; P2 - P11; P11 - P3; P11 - P8; P2 - P3; P2 - P8                     |
| TC1600009632.hg.1 | TC1600009632.hg.1 | ENST00000567236.1              | RP11-626G11.3 |          | 15.32<br>4 | 7.51<br>E-05 | 4.12<br>42 | 9.32<br>E-05 | P10 - ctrl; P11 - ctrl; P8 - ctrl; P10 - P11; P10 - P2; P10 - P3; P11 - P2; P8 - P11; P8 - P2; P8 - P3                     |
| TC0300010681.hg.1 | TC0300010681.hg.1 | stofubo.aAug10-<br>unspliced   | stofubo       | NA       | 15.32<br>3 | 7.52<br>E-05 | 4.12<br>41 | 9.32<br>E-05 | ctrl - P10; ctrl - P11; ctrl - P3; ctrl - P8; P2 - P10; P2 - P11; P11 - P8; P2 - P3; P2 - P8; P3 - P8                      |
| TC1600009203.hg.1 | TC1600009203.hg.1 | flusnor.aAug10-<br>unspliced   | flusnor       | NA       | 15.31<br>1 | 7.54<br>E-05 | 4.12<br>24 | 9.35<br>E-05 | ctrl - P10; ctrl - P11; ctrl - P3; ctrl - P8; P2 - P10; P2 - P11; P2 - P3; P2 - P8                                         |

|                         |                         |                                |               |          |       |              |            |              |                                                                                                                          |
|-------------------------|-------------------------|--------------------------------|---------------|----------|-------|--------------|------------|--------------|--------------------------------------------------------------------------------------------------------------------------|
| TC0900007769.hg.1       | TC0900007769.hg.1       | wawwyby.aAug10-<br>unspliced   | wawwyby       | NA       | 15.31 | 7.55<br>E-05 | 4.12<br>23 | 9.35<br>E-05 | ctrl - P10; ctrl - P3; ctrl - P8; P11 - P10; P2 - P10; P2 - P11; P11 - P3; P11 - P8; P2 - P3; P2 - P8                    |
| TC0700012233.hg.1       | TC0700012233.hg.1       | sehura.aAug10-<br>unspliced    | sehura        | NA       | 15.29 | 7.58<br>E-05 | 4.12<br>01 | 9.39<br>E-05 | P10 - ctrl; P3 - ctrl; P8 - ctrl; P10 - P11; P10 - P2; P3 - P10; P3 - P11; P8 - P11; P3 - P2; P3 - P8                    |
| TC0300008842.hg.1       | TC0300008842.hg.1       | smoyboybu.aAug10-<br>unspliced | smoyboybu     | NA       | 15.28 | 7.61<br>E-05 | 4.11<br>85 | 9.42<br>E-05 | ctrl - P10; ctrl - P11; ctrl - P3; ctrl - P8; P11 - P10; P2 - P10; P11 - P3; P11 - P8; P2 - P3; P2 - P8                  |
| TC1400007719.hg.1       | TC1400007719.hg.1       | tihuri.aAug10-<br>unspliced    | tihuri        | NA       | 15.26 | 7.65<br>E-05 | 4.11<br>62 | 9.47<br>E-05 | ctrl - P10; ctrl - P11; P2 - ctrl; ctrl - P8; P2 - P10; P3 - P10; P2 - P11; P3 - P11; P2 - P8; P3 - P8                   |
| TC0X00008864.hg.1       | TC0X00008864.hg.1       | koymy.aAug10-<br>unspliced     | koymy         | NA       | 15.26 | 7.67<br>E-05 | 4.11<br>5  | 9.49<br>E-05 | ctrl - P10; P2 - ctrl; ctrl - P3; ctrl - P8; P2 - P10; P2 - P11; P11 - P8; P2 - P3; P2 - P8; P3 - P8                     |
| TC0200012741.hg.1       | TC0200012741.hg.1       | watuyo.aAug10-<br>unspliced    | watuyo        | NA       | 15.23 | 7.73<br>E-05 | 4.11<br>19 | 9.55<br>E-05 | ctrl - P10; ctrl - P11; ctrl - P8; P2 - P10; P3 - P10; P10 - P8; P2 - P11; P3 - P11; P11 - P8; P2 - P8; P3 - P8          |
| TC1800008675.hg.1       | TC1800008675.hg.1       | NR 036204                      | MIR4320       | 1E+08    | 15.23 | 7.74<br>E-05 | 4.11<br>13 | 9.56<br>E-05 | ctrl - P10; ctrl - P11; ctrl - P3; ctrl - P8; P2 - P10; P10 - P8; P2 - P11; P11 - P8; P2 - P3; P2 - P8; P3 - P8          |
| TSUnmapped00000340.hg.1 | TSUnmapped00000340.hg.1 | ENST000000627983               | SNORD24       |          | 15.21 | 7.78<br>E-05 | 4.10<br>92 | 9.60<br>E-05 | ctrl - P10; P11 - ctrl; P2 - ctrl; ctrl - P3; P11 - P10; P2 - P10; P11 - P3; P11 - P8; P2 - P3; P2 - P8                  |
| TSUnmapped00000845.hg.1 | TSUnmapped00000845.hg.1 | NA                             | NA            | NA       | 15.21 | 7.78<br>E-05 | 4.10<br>92 | 9.60<br>E-05 | ctrl - P10; P11 - ctrl; P2 - ctrl; ctrl - P3; P11 - P10; P2 - P10; P11 - P3; P11 - P8; P2 - P3; P2 - P8                  |
| TC1200011796.hg.1       | TC1200011796.hg.1       | NA                             | NA            | NA       | 15.18 | 7.87<br>E-05 | 4.10<br>39 | 9.71<br>E-05 | P10 - ctrl; P11 - ctrl; ctrl - P3; P10 - P2; P10 - P3; P10 - P8; P11 - P2; P11 - P3; P11 - P8; P2 - P3; P8 - P3          |
| TC0300006744.hg.1       | TC0300006744.hg.1       | ENST00000607363.1              | RP11-415F23.3 |          | 15.17 | 7.88<br>E-05 | 4.10<br>36 | 9.71<br>E-05 | ctrl - P10; ctrl - P11; ctrl - P3; ctrl - P8; P11 - P10; P2 - P10; P2 - P11; P11 - P3; P11 - P8; P2 - P3; P2 - P8        |
| TC0700007273.hg.1       | TC0700007273.hg.1       | loyku.aAug10-<br>unspliced     | loyku         | NA       | 15.16 | 7.91<br>E-05 | 4.10<br>17 | 9.75<br>E-05 | ctrl - P10; ctrl - P11; ctrl - P3; ctrl - P8; P2 - P10; P3 - P10; P2 - P11; P3 - P11; P2 - P3; P2 - P8; P3 - P8          |
| TC0X00008109.hg.1       | TC0X00008109.hg.1       | dadu.aAug10-<br>unspliced      | dadu          | NA       | 15.12 | 8.03<br>E-05 | 4.09<br>55 | 9.88<br>E-05 | ctrl - P10; ctrl - P3; ctrl - P8; P11 - P10; P2 - P10; P3 - P10; P11 - P8; P2 - P3; P2 - P8; P3 - P8                     |
| TC0400008524.hg.1       | TC0400008524.hg.1       | ENST00000419264                | LOC105377390  | 1.05E+08 | 15.11 | 8.04<br>E-05 | 4.09<br>47 | 9.90<br>E-05 | ctrl - P10; ctrl - P11; ctrl - P3; ctrl - P8; P10 - P11; P2 - P10; P2 - P11; P2 - P3; P2 - P8                            |
| TC0600010125.hg.1       | TC0600010125.hg.1       | tonire.aAug10-<br>unspliced    | tonire        | NA       | 15.10 | 8.08<br>E-05 | 4.09<br>25 | 9.94<br>E-05 | ctrl - P10; ctrl - P11; ctrl - P3; ctrl - P8; P11 - P10; P2 - P10; P2 - P11; P11 - P8; P2 - P3; P2 - P8                  |
| TC1200006664.hg.1       | TC1200006664.hg.1       | spoyzeeby.aAug10               | spoyzeeby     | NA       | 15.09 | 8.09<br>E-05 | 4.09<br>18 | 9.96<br>E-05 | P10 - ctrl; P11 - ctrl; ctrl - P2; P8 - ctrl; P10 - P2; P10 - P3; P11 - P2; P11 - P3; P3 - P2; P2 - P8; P2 - P8; P3 - P3 |
| TC0600007900.hg.1       | TC0600007900.hg.1       | blorspabu.aAug10-<br>unspliced | blorspabu     | NA       | 15.08 | 8.13<br>E-05 | 4.09<br>5  | 9.99<br>E-05 | ctrl - P10; ctrl - P11; ctrl - P8; P2 - P10; P3 - P10; P2 - P11; P11 - P8; P2 - P3; P2 - P8; P3 - P8                     |
| TC1700008456.hg.1       | TC1700008456.hg.1       | ENST00000623355                | RP11-567L7.3  |          | 15.07 | 8.15<br>E-05 | 4.08<br>9  | 0.00<br>01   | ctrl - P10; ctrl - P11; ctrl - P3; ctrl - P8; P2 - P10; P2 - P11; P11 - P8; P2 - P3; P2 - P8; P3 - P8                    |
| TC0600011202.hg.1       | TC0600011202.hg.1       | NA                             | NA            | NA       | 15.06 | 8.18<br>E-05 | 4.08<br>71 | 0.00<br>01   | P10 - ctrl; P3 - ctrl; P8 - ctrl; P10 - P11; P10 - P2; P3 - P11; P8 - P11; P3 - P2; P8 - P2                              |
| HTA2-pos-2978683_st     | 23150241                | NA                             | NA            | NA       | 15.06 | 8.19<br>E-05 | 4.08<br>69 | 0.00<br>01   | ctrl - P10; ctrl - P8; P11 - P10; P2 - P10; P3 - P10; P11 - P8; P2 - P8; P3 - P8                                         |
| TC0400007423.hg.1       | TC0400007423.hg.1       | NA                             | NA            | NA       | 15.03 | 8.26<br>E-05 | 4.08<br>31 | 0.00<br>01   | ctrl - P11; P2 - ctrl; P3 - ctrl; ctrl - P8; P2 - P10; P3 - P10; P2 - P11; P3 - P11; P2 - P8; P3 - P8                    |
| TC1200008131.hg.1       | TC1200008131.hg.1       | chuno.aAug10-<br>unspliced     | chuno         | NA       | 15.00 | 8.35<br>E-05 | 4.07<br>81 | 0.00<br>010  | ctrl - P10; ctrl - P11; ctrl - P3; ctrl - P8; P11 - P10; P2 - P10; P11 - P3; P11 - P8; P2 - P3; P2 - P8                  |
| TC0X00008337.hg.1       | TC0X00008337.hg.1       | NA                             | NA            | NA       | 14.99 | 8.38<br>E-05 | 4.07<br>68 | 0.00<br>010  | ctrl - P10; ctrl - P11; ctrl - P3; ctrl - P8; P2 - P10; P3 - P10; P2 - P11; P11 - P8; P2 - P3; P2 - P8; P3 - P8          |
| TC1900010841.hg.1       | TC1900010841.hg.1       | ENST00000595748.1              | CTC-490G23.2  |          | 14.98 | 8.40<br>E-05 | 4.07<br>56 | 0.00<br>010  | P10 - ctrl; P3 - ctrl; P8 - ctrl; P10 - P11; P10 - P2; P3 - P11; P8 - P11; P3 - P2; P8 - P2                              |
| TC0300012655.hg.1       | TC0300012655.hg.1       | chydobu.aAug10-<br>unspliced   | chydobu       | NA       | 14.97 | 8.42<br>E-05 | 4.07<br>44 | 0.00<br>010  | ctrl - P10; ctrl - P11; ctrl - P8; P2 - P10; P3 - P10; P2 - P11; P11 - P8; P2 - P3; P2 - P8; P3 - P8                     |
| TC1400009549.hg.1       | TC1400009549.hg.1       | NA                             | NA            | NA       | 14.94 | 8.52<br>E-05 | 4.06<br>98 | 0.00<br>010  | P10 - ctrl; P11 - ctrl; P8 - ctrl; P10 - P2; P10 - P3; P11 - P2; P11 - P3; P3 - P2; P8 - P2; P8 - P3                     |
| TC0100009559.hg.1       | TC0100009559.hg.1       | gloymarbu.aAug10-<br>unspliced | gloymarbu     | NA       | 14.94 | 8.53<br>E-05 | 4.06<br>9  | 0.00<br>010  | ctrl - P10; ctrl - P11; ctrl - P3; ctrl - P8; P2 - P10; P3 - P10; P2 - P11; P2 - P3; P2 - P8; P3 - P8                    |
| TC0X00008052.hg.1       | TC0X00008052.hg.1       | NM_001184782                   | CXorf57       | 55086    | 14.87 | 8.72<br>E-05 | 4.05<br>97 | 0.00<br>010  | ctrl - P10; ctrl - P2; ctrl - P3; ctrl - P8; P11 - P10; P11 - P2; P11 - P3; P11 - P8; P3 - P8                            |
| TC0400012610.hg.1       | TC0400012610.hg.1       | blysparby.aAug10-<br>unspliced | blysparby     | NA       | 14.81 | 8.90<br>E-05 | 4.05<br>08 | 0.00<br>010  | ctrl - P10; ctrl - P11; P2 - ctrl; ctrl - P8; P2 - P10; P3 - P10; P2 - P11; P11 - P8; P2 - P3; P2 - P8; P3 - P8          |
| TC1400008819.hg.1       | TC1400008819.hg.1       | NA                             | NA            | NA       | 14.81 | 8.90<br>E-05 | 4.05<br>07 | 0.00<br>010  | ctrl - P10; ctrl - P11; ctrl - P3; ctrl - P8; P2 - P10; P2 - P11; P11 - P8; P2 - P3; P2 - P8; P3 - P8                    |
| TC1700012350.hg.1       | TC1700012350.hg.1       | NA                             | NA            | NA       | 14.81 | 8.91<br>E-05 | 4.05<br>03 | 0.00<br>010  | ctrl - P10; ctrl - P11; ctrl - P3; ctrl - P8; P11 - P10; P2 - P10; P2 - P11; P11 - P8; P2 - P3; P2 - P8; P3 - P8         |
| TC1200008737.hg.1       | TC1200008737.hg.1       | dadoby.aAug10-<br>unspliced    | dadoby        | NA       | 14.73 | 9.14<br>E-05 | 4.03<br>92 | 0.00<br>011  | ctrl - P10; ctrl - P11; ctrl - P3; ctrl - P8; P2 - P10; P3 - P10; P2 - P11; P2 - P3; P2 - P8; P3 - P8                    |
| TC0100008524.hg.1       | TC0100008524.hg.1       | norbor.aAug10-<br>unspliced    | norbor        | NA       | 14.73 | 9.14<br>E-05 | 4.03<br>9  | 0.00<br>011  | ctrl - P10; ctrl - P3; ctrl - P8; P11 - P10; P2 - P10; P3 - P10; P8 - P10; P2 - P11; P11 - P8; P2 - P3; P2 - P8          |

|                      |                   |                                          |                   |    |             |              |            |                  |                                                                                                                   |
|----------------------|-------------------|------------------------------------------|-------------------|----|-------------|--------------|------------|------------------|-------------------------------------------------------------------------------------------------------------------|
| TC0800011585.hg.1    | TC0800011585.hg.1 | wyskerbu.aAug10-<br>unspliced            | wyskerbu          | NA | 14.72<br>2  | 9.18<br>E-05 | 4.03<br>71 | 0.00<br>011<br>2 | ctrl - P10; ctrl - P11; ctrl - P3; ctrl - P8; P2 - P10; P2 - P11; P3 - P11; P2 - P3; P2 - P8; P3 - P8             |
| TC2000009443.hg.1    | TC2000009443.hg.1 | bleyvey.aAug10-<br>unspliced             | bleyvey           | NA | 14.71<br>6  | 9.20<br>E-05 | 4.03<br>63 | 0.00<br>011<br>2 | ctrl - P10; ctrl - P11; ctrl - P3; ctrl - P8; P2 - P10; P3 - P10; P2 - P11; P2 - P3; P2 - P8; P3 - P8             |
| TC0300011409.hg.1    | TC0300011409.hg.1 | NA                                       | NA                | NA | 14.71<br>71 | 9.22<br>E-05 | 4.03<br>53 | 0.00<br>011<br>2 | ctrl - P10; ctrl - P11; ctrl - P3; ctrl - P8; P11 - P10; P2 - P10; P2 - P11; P11 - P8; P2 - P3; P2 - P8; P3 - P8  |
| TC0600010925.hg.1    | TC0600010925.hg.1 | NA                                       | NA                | NA | 14.69<br>3  | 9.27<br>E-05 | 4.03<br>29 | 0.00<br>011<br>3 | ctrl - P10; ctrl - P11; ctrl - P8; P2 - P10; P3 - P10; P2 - P11; P3 - P11; P2 - P8; P3 - P8                       |
| TC0600011424.hg.1    | TC0600011424.hg.1 | ENST00000606743.1                        | XXbac-BPG181823.7 |    | 14.69<br>3  | 9.27<br>E-05 | 4.03<br>28 | 0.00<br>011<br>3 | ctrl - P10; P11 - ctrl; ctrl - P3; ctrl - P8; P11 - P10; P2 - P10; P11 - P2; P11 - P3; P11 - P8; P2 - P3; P2 - P8 |
| TC0500011304.hg.1    | TC0500011304.hg.1 | blaployby.aAug10-<br>unspliced           | blaployby         | NA | 14.68<br>5  | 9.30<br>E-05 | 4.03<br>17 | 0.00<br>011<br>3 | ctrl - P10; P2 - ctrl; ctrl - P8; P11 - P10; P2 - P10; P2 - P11; P11 - P8; P2 - P3; P2 - P8; P3 - P8              |
| TC1400006999.hg.1    | TC1400006999.hg.1 | ENST00000553366                          | RP11-1053O12.1    | NA | 14.65<br>3  | 9.40<br>E-05 | 4.02<br>7  | 0.00<br>011<br>4 | ctrl - P10; ctrl - P3; ctrl - P8; P11 - P10; P2 - P10; P11 - P3; P11 - P8; P2 - P3; P2 - P8                       |
| TC0200012635.hg.1    | TC0200012635.hg.1 | sworkabu.aAug10-<br>unspliced            | sworkabu          | NA | 14.64<br>4  | 9.43<br>E-05 | 4.02<br>56 | 0.00<br>011<br>5 | ctrl - P10; ctrl - P11; ctrl - P3; ctrl - P8; P2 - P10; P2 - P11; P11 - P8; P2 - P3; P2 - P8; P3 - P8             |
| TC1600007033.hg.1    | TC1600007033.hg.1 | klawserbo.aAug10-<br>unspliced           | klawserbo         | NA | 14.62<br>1  | 9.50<br>E-05 | 4.02<br>22 | 0.00<br>011<br>5 | ctrl - P10; ctrl - P11; ctrl - P3; ctrl - P8; P2 - P10; P2 - P11; P2 - P3; P2 - P8; P3 - P8                       |
| TC1500008090.hg.1    | TC1500008090.hg.1 | mochabu.aAug10-<br>unspliced             | mochabu           |    | 14.61<br>2  | 9.53<br>E-05 | 4.02<br>09 | 0.00<br>011<br>6 | ctrl - P10; ctrl - P11; ctrl - P3; ctrl - P8; P2 - P10; P2 - P11; P11 - P8; P2 - P3; P2 - P8                      |
| TC0700008824.hg.1    | TC0700008824.hg.1 | shorpaby.aAug10-<br>unspliced            | shorpaby          | NA | 14.61<br>2  | 9.53<br>E-05 | 4.02<br>09 | 0.00<br>011<br>6 | ctrl - P10; ctrl - P11; ctrl - P3; ctrl - P8; P2 - P10; P2 - P11; P2 - P3; P2 - P8                                |
| TC0400010127.hg.1    | TC0400010127.hg.1 | yatome.aAug10-<br>unspliced              | yatome            | NA | 14.60<br>7  | 9.55<br>E-05 | 4.02<br>02 | 0.00<br>011<br>6 | ctrl - P10; ctrl - P11; ctrl - P3; ctrl - P8; P2 - P10; P2 - P11; P2 - P3; P2 - P8                                |
| TC0700010684.hg.1    | TC0700010684.hg.1 | flublar.aAug10-<br>unspliced             | flublar           | NA | 14.60<br>2  | 9.56<br>E-05 | 4.01<br>95 | 0.00<br>011<br>6 | ctrl - P10; ctrl - P11; ctrl - P8; P2 - P10; P3 - P10; P2 - P11; P3 - P11; P2 - P8; P3 - P8                       |
| TC1000007565.hg.1    | TC1000007565.hg.1 | neymar.aAug10-<br>unspliced              | neymar            | NA | 14.60<br>1  | 9.56<br>E-05 | 4.01<br>94 | 0.00<br>011<br>6 | ctrl - P10; ctrl - P11; ctrl - P8; P2 - P10; P3 - P10; P2 - P11; P11 - P8; P2 - P3; P2 - P8; P3 - P8              |
| TC0600008549.hg.1    | TC0600008549.hg.1 | NA                                       | NA                | NA | 14.59<br>4  | 9.59<br>E-05 | 4.01<br>83 | 0.00<br>011<br>6 | P10 - ctrl; P2 - ctrl; P8 - ctrl; P10 - P11; P10 - P3; P2 - P11; P8 - P11; P2 - P3; P2 - P8; P8 - P3              |
| TC0700007049.hg.1    | TC0700007049.hg.1 | soyja.aAug10-<br>unspliced               | soyja             | NA | 14.57<br>2  | 9.66<br>E-05 | 4.01<br>51 | 0.00<br>011<br>7 | ctrl - P10; ctrl - P8; P11 - P10; P2 - P10; P3 - P10; P11 - P8; P2 - P8; P3 - P8                                  |
| TC0200009960.hg.1    | TC0200009960.hg.1 | padar.aAug10-<br>unspliced               | padar             | NA | 14.52<br>1  | 9.83<br>E-05 | 4.00<br>75 | 0.00<br>011<br>9 | ctrl - P10; ctrl - P8; P11 - P10; P2 - P10; P3 - P10; P2 - P11; P11 - P8; P2 - P8; P3 - P8                        |
| TC0800011251.hg.1    | TC0800011251.hg.1 | savawby.aAug10-<br>unspliced             | savawby           | NA | 14.49<br>1  | 9.93<br>E-05 | 4.00<br>3  | 0.00<br>012      | ctrl - P10; ctrl - P11; ctrl - P3; ctrl - P8; P2 - P10; P2 - P11; P2 - P3; P2 - P8                                |
| TC1800006600.hg.1    | TC1800006600.hg.1 | kukori.aAug10-<br>unspliced              | kukori            | NA | 14.48<br>5  | 9.95<br>E-05 | 4.00<br>21 | 0.00<br>012      | ctrl - P10; ctrl - P11; ctrl - P8; P2 - P10; P3 - P10; P10 - P8; P2 - P11; P3 - P11; P11 - P8; P2 - P8; P3 - P8   |
| TC1800009088.hg.1    | TC1800009088.hg.1 | glorploy.aAug10-<br>unspliced            | glorploy          | NA | 14.47<br>6  | 9.98<br>E-05 | 4.00<br>07 | 0.00<br>012<br>1 | ctrl - P10; ctrl - P11; ctrl - P8; P2 - P10; P10 - P8; P2 - P11; P3 - P11; P2 - P3; P2 - P8; P3 - P8              |
| TC0500011034.hg.1    | TC0500011034.hg.1 | cheeju.aAug10-<br>unspliced              | cheeju            | NA | 14.46<br>8  | 0.00<br>01   | 3.99<br>95 | 0.00<br>012<br>1 | ctrl - P10; ctrl - P11; ctrl - P3; ctrl - P8; P2 - P10; P2 - P11; P11 - P8; P2 - P3; P2 - P8; P3 - P8             |
| TC0500006812.hg.1    | TC0500006812.hg.1 | voyslarbu.aAug10-<br>unspliced           | voyslarbu         | NA | 14.46<br>5  | 0.00<br>01   | 3.99<br>91 | 0.00<br>012<br>1 | ctrl - P10; ctrl - P11; ctrl - P8; P2 - P10; P3 - P10; P10 - P8; P2 - P11; P3 - P11; P2 - P3; P2 - P8; P3 - P8    |
| TC1500007321.hg.1    | TC1500007321.hg.1 | skeyklo.aAug10-<br>unspliced             | skeyklo           | NA | 14.46<br>4  | 0.00<br>01   | 3.99<br>83 | 0.00<br>012<br>1 | ctrl - P10; P2 - ctrl; ctrl - P8; P11 - P10; P2 - P10; P3 - P10; P2 - P11; P2 - P3; P2 - P8; P3 - P8              |
| TC0600007356.hg.1    | TC0600007356.hg.1 | NA                                       | NA                | NA | 14.45<br>9  | 0.00<br>01   | 3.99<br>82 | 0.00<br>012<br>1 | P10 - ctrl; P3 - ctrl; P8 - ctrl; P10 - P11; P10 - P2; P3 - P11; P8 - P11; P3 - P2; P8 - P2                       |
| TC0200007187.hg.1    | TC0200007187.hg.1 | slerjeebu.aAug10-<br>unspliced           | slerjeebu         | NA | 14.45<br>9  | 0.00<br>01   | 3.99<br>81 | 0.00<br>012<br>1 | ctrl - P10; ctrl - P11; ctrl - P3; ctrl - P8; P2 - P10; P3 - P10; P2 - P11; P2 - P3; P2 - P8                      |
| TC0300011411.hg.1    | TC0300011411.hg.1 | perverbo.aAug10-<br>unspliced            | perverbo          | NA | 14.45<br>5  | 0.00<br>01   | 3.99<br>76 | 0.00<br>012<br>1 | ctrl - P10; ctrl - P11; ctrl - P3; ctrl - P8; P2 - P10; P2 - P11; P11 - P8; P2 - P3; P2 - P8                      |
| TC0100015961.hg.1    | TC0100015961.hg.1 | romaro.aAug10-<br>unspliced              | romaro            | NA | 14.41<br>7  | 0.00<br>02   | 3.99<br>19 | 0.00<br>012<br>3 | ctrl - P10; P2 - ctrl; ctrl - P8; P11 - P10; P2 - P10; P2 - P11; P11 - P8; P2 - P3; P2 - P8; P3 - P8              |
| TC0800011545.hg.1    | TC0800011545.hg.1 | NA                                       | NA                | NA | 14.41<br>41 | 0.00<br>02   | 3.99<br>09 | 0.00<br>012<br>3 | ctrl - P10; ctrl - P11; P2 - ctrl; ctrl - P8; P2 - P10; P3 - P10; P2 - P11; P3 - P11; P2 - P3; P2 - P8; P3 - P8   |
| TC0100013883.hg.1    | TC0100013883.hg.1 | jupla.aAug10-<br>unspliced               | jupla             | NA | 14.36<br>4  | 0.00<br>01   | 3.98<br>35 | 0.00<br>012<br>5 | ctrl - P10; ctrl - P11; ctrl - P3; ctrl - P8; P2 - P10; P3 - P10; P2 - P11; P2 - P3; P2 - P8; P3 - P8             |
| TC0100011866.hg.1    | TC0100011866.hg.1 | NA                                       | NA                | NA | 14.35<br>2  | 0.00<br>04   | 3.98<br>22 | 0.00<br>012<br>5 | ctrl - P10; ctrl - P11; ctrl - P3; ctrl - P8; P2 - P10; P3 - P10; P10 - P8; P2 - P11; P11 - P8; P2 - P8; P3 - P8  |
| TC0600013904.hg.1    | TC0600013904.hg.1 | RNASET2andRPS6K A2.voAug10-<br>unspliced | RNASET2andRPS6KA2 | NA | 14.33<br>9  | 0.00<br>010  | 3.98<br>03 | 0.00<br>012<br>6 | ctrl - P10; ctrl - P11; ctrl - P3; ctrl - P8; P10 - P11; P2 - P10; P2 - P11; P2 - P3; P2 - P8                     |
| HTA2-pos-47424483 st | 23150859          | NA                                       | NA                | NA | 14.33<br>1  | 0.00<br>010  | 3.97<br>5  | 0.00<br>012<br>6 | ctrl - P10; ctrl - P11; ctrl - P8; P2 - P10; P3 - P10; P2 - P11; P2 - P3; P2 - P8; P3 - P8                        |

|                     |                   |                                |              |          |        |         |        |         |                                                                                                                   |
|---------------------|-------------------|--------------------------------|--------------|----------|--------|---------|--------|---------|-------------------------------------------------------------------------------------------------------------------|
| HTA2-pos-3615330_st | 23150705          | NA                             | NA           | NA       | 14.294 | 0.00106 | 3.9735 | 0.00128 | P10 - ctrl; P11 - ctrl; ctrl - P2; P3 - ctrl; P8 - ctrl; P10 - P2; P11 - P2; P3 - P2; P8 - P2                     |
| TC0100011486.hg.1   | TC0100011486.hg.1 | NA                             | NA           | NA       | 14.268 | 0.00107 | 3.9696 | 0.00129 | ctrl - P10; ctrl - P11; ctrl - P3; ctrl - P8; P2 - P10; P2 - P11; P2 - P3; P2 - P8; P3 - P8                       |
| TC2200008362.hg.1   | TC2200008362.hg.1 | spoey.aAug10-<br>unspliced     | spoey        | NA       | 14.221 | 0.00109 | 3.9624 | 0.00131 | ctrl - P10; ctrl - P11; ctrl - P8; P2 - P10; P3 - P10; P2 - P11; P3 - P11; P2 - P8; P3 - P8                       |
| TC2100007809.hg.1   | TC2100007809.hg.1 | womu.aAug10-<br>unspliced      | womu         | NA       | 14.207 | 0.00111 | 3.9604 | 0.00131 | ctrl - P10; ctrl - P11; ctrl - P3; ctrl - P8; P2 - P10; P2 - P11; P2 - P3; P2 - P8                                |
| TC1500008024.hg.1   | TC1500008024.hg.1 | steeyoybu.aAug10-<br>unspliced | steeyoybu    | NA       | 14.204 | 0.00111 | 3.9599 | 0.00131 | ctrl - P10; ctrl - P11; ctrl - P3; ctrl - P8; P2 - P10; P3 - P10; P2 - P11; P2 - P3; P2 - P8; P3 - P8             |
| TC0900006541.hg.1   | TC0900006541.hg.1 | ENST00000456661                | MTND1P11     | NA       | 14.144 | 0.00111 | 3.9508 | 0.00134 | ctrl - P10; ctrl - P8; P11 - P10; P2 - P10; P3 - P10; P11 - P8; P2 - P8; P3 - P8                                  |
| TC1100006889.hg.1   | TC1100006889.hg.1 | bykorby.aAug10-<br>unspliced   | bykorby      | NA       | 14.131 | 0.00111 | 3.9489 | 0.00135 | ctrl - P10; ctrl - P11; ctrl - P8; P2 - P10; P2 - P11; P3 - P11; P2 - P3; P2 - P8; P3 - P8                        |
| TC1100009235.hg.1   | TC1100009235.hg.1 | ENST00000531886.1              | RP11-1101.6  |          | 14.098 | 0.00111 | 3.9438 | 0.00136 | P10 - ctrl; P11 - ctrl; P3 - ctrl; P8 - ctrl; P10 - P2; P10 - P3; P11 - P2; P11 - P3; P8 - P2; P8 - P3            |
| TC1700010985.hg.1   | TC1700010985.hg.1 | uc060guz.1                     | RNU6-1152P   | NA       | 14.091 | 0.00111 | 3.9427 | 0.00136 | ctrl - P10; ctrl - P11; ctrl - P8; P2 - P10; P3 - P10; P2 - P11; P11 - P8; P2 - P3; P2 - P8; P3 - P8              |
| TC0X00008989.hg.1   | TC0X00008989.hg.1 | NM_001282145                   | NLGN4X       | 57502    | 14.071 | 0.00111 | 3.9396 | 0.00137 | ctrl - P10; ctrl - P2; ctrl - P3; ctrl - P8; P11 - P10; P11 - P2; P11 - P3; P11 - P8; P3 - P2; P3 - P8            |
| TC0500007535.hg.1   | TC0500007535.hg.1 | NA                             | NA           | NA       | 14.068 | 0.00111 | 3.9392 | 0.00137 | ctrl - P10; ctrl - P11; ctrl - P3; ctrl - P8; P2 - P10; P2 - P11; P2 - P3; P2 - P8                                |
| TC0600009289.hg.1   | TC0600009289.hg.1 | spuplawbu.aAug10-<br>unspliced | spuplawbu    | NA       | 14.035 | 0.00111 | 3.9342 | 0.00139 | ctrl - P10; ctrl - P11; ctrl - P3; ctrl - P8; P11 - P10; P2 - P10; P2 - P11; P11 - P3; P11 - P8; P2 - P3; P2 - P8 |
| TC0600013465.hg.1   | TC0600013465.hg.1 | NA                             | NA           | NA       | 14.034 | 0.00111 | 3.9339 | 0.00139 | ctrl - P10; ctrl - P11; ctrl - P3; ctrl - P8; P11 - P10; P2 - P10; P2 - P11; P11 - P8; P2 - P3; P2 - P8           |
| TC0X00007705.hg.1   | TC0X00007705.hg.1 | skeybey.aAug10-<br>unspliced   | skeybey      | NA       | 14.016 | 0.00111 | 3.937  | 0.0014  | ctrl - P10; ctrl - P11; ctrl - P3; ctrl - P8; P11 - P10; P2 - P10; P11 - P3; P11 - P8; P2 - P3; P2 - P8           |
| TC1300009259.hg.1   | TC1300009259.hg.1 | NA                             | NA           | NA       | 13.998 | 0.00111 | 3.9285 | 0.00141 | ctrl - P10; ctrl - P11; ctrl - P3; ctrl - P8; P2 - P10; P2 - P11; P2 - P3; P2 - P8                                |
| TC0800011548.hg.1   | TC0800011548.hg.1 | snordorby.aAug10-<br>unspliced | snordorby    | NA       | 13.976 | 0.00111 | 3.9251 | 0.00142 | ctrl - P10; P2 - ctrl; ctrl - P8; P2 - P10; P3 - P10; P2 - P11; P3 - P11; P2 - P3; P2 - P8; P3 - P8               |
| TC1200012757.hg.1   | TC1200012757.hg.1 | ENST00000542513                | TAS2R12      |          | 13.939 | 0.00112 | 3.9195 | 0.00143 | ctrl - P10; ctrl - P8; P11 - P10; P2 - P10; P3 - P10; P2 - P11; P11 - P8; P2 - P3; P2 - P8; P3 - P8               |
| TC1300006484.hg.1   | TC1300006484.hg.1 | teyare.aAug10-<br>unspliced    | teyare       | NA       | 13.931 | 0.00112 | 3.9182 | 0.00144 | ctrl - P10; ctrl - P11; ctrl - P3; ctrl - P8; P2 - P10; P2 - P11; P2 - P3; P2 - P8                                |
| TC1900009538.hg.1   | TC1900009538.hg.1 | NA                             | NA           | NA       | 13.909 | 0.00112 | 3.9148 | 0.00145 | P10 - ctrl; P11 - ctrl; P8 - ctrl; P10 - P2; P10 - P3; P10 - P8; P11 - P2; P11 - P3; P8 - P2; P8 - P3             |
| TC1200010928.hg.1   | TC1200010928.hg.1 | NR_003046                      | SNORD59B     | 12q13.3  | 13.901 | 0.00112 | 3.912  | 0.00145 | ctrl - P10; ctrl - P3; ctrl - P8; P11 - P10; P2 - P10; P11 - P3; P11 - P8; P2 - P3; P2 - P8                       |
| TC0300012491.hg.1   | TC0300012491.hg.1 | shudabu.aAug10-<br>unspliced   | shudabu      | NA       | 13.919 | 0.00112 | 3.9135 | 0.00145 | ctrl - P10; ctrl - P11; P2 - ctrl; ctrl - P8; P2 - P10; P2 - P11; P2 - P3; P2 - P8; P3 - P8                       |
| TC0700006841.hg.1   | TC0700006841.hg.1 | ENST00000430859                | LOC100506098 | 1.01E+08 | 13.892 | 0.00112 | 3.9122 | 0.00145 | P11 - ctrl; P8 - ctrl; P11 - P10; P10 - P2; P10 - P3; P8 - P10; P11 - P2; P11 - P3; P8 - P2; P8 - P3              |
| TC0200007420.hg.1   | TC0200007420.hg.1 | NA                             | NA           | NA       | 13.888 | 0.00112 | 3.9117 | 0.00146 | ctrl - P10; ctrl - P3; ctrl - P8; P11 - P10; P2 - P10; P3 - P10; P2 - P11; P11 - P8; P2 - P3; P2 - P8; P3 - P8    |
| TC0500010395.hg.1   | TC0500010395.hg.1 | fuzzyby.aAug10-<br>unspliced   | fuzzyby      | NA       | 13.879 | 0.00112 | 3.9102 | 0.00146 | ctrl - P10; ctrl - P11; ctrl - P3; ctrl - P8; P2 - P10; P2 - P11; P2 - P3; P2 - P8; P3 - P8                       |
| HTA2-pos-3145790_st | 23150340          | NA                             | NA           | NA       | 13.831 | 0.00112 | 3.9028 | 0.00148 | ctrl - P10; ctrl - P3; ctrl - P8; P2 - P10; P2 - P11; P11 - P3; P11 - P8; P2 - P3; P2 - P8                        |
| TC0100014621.hg.1   | TC0100014621.hg.1 | sawmarbo.aAug10-<br>unspliced  | sawmarbo     | NA       | 13.802 | 0.00112 | 3.8982 | 0.0015  | P2 - ctrl; P3 - ctrl; P11 - P10; P2 - P10; P3 - P10; P2 - P11; P11 - P8; P2 - P3; P2 - P8; P3 - P8                |
| TC0900011820.hg.1   | TC0900011820.hg.1 | TSC1.pAug10-<br>unspliced      | TSC1         | NA       | 13.796 | 0.00112 | 3.8974 | 0.0015  | ctrl - P10; ctrl - P11; ctrl - P3; ctrl - P8; P2 - P10; P2 - P11; P2 - P3; P2 - P8                                |
| TC0600011170.hg.1   | TC0600011170.hg.1 | NA                             | NA           | NA       | 13.777 | 0.00112 | 3.894  | 0.00151 | ctrl - P10; P2 - ctrl; ctrl - P3; ctrl - P8; P2 - P10; P10 - P8; P2 - P11; P11 - P8; P2 - P3; P2 - P8             |
| TC0800011537.hg.1   | TC0800011537.hg.1 | gloverby.aAug10-<br>unspliced  | gloverby     | NA       | 13.649 | 0.00113 | 3.8745 | 0.00158 | ctrl - P10; ctrl - P11; ctrl - P3; ctrl - P8; P2 - P10; P2 - P11; P2 - P3; P2 - P8; P3 - P8                       |
| TC0600012336.hg.1   | TC0600012336.hg.1 | NA                             | NA           | NA       | 13.646 | 0.00113 | 3.8741 | 0.00158 | ctrl - P10; ctrl - P11; ctrl - P8; P2 - P10; P3 - P10; P2 - P11; P3 - P11; P11 - P8; P2 - P8; P3 - P8             |
| TC0900006539.hg.1   | TC0900006539.hg.1 | hsa_circ_0001838               | JAK2         | NA       | 13.628 | 0.00113 | 3.8712 | 0.00159 | ctrl - P10; ctrl - P11; ctrl - P8; P2 - P10; P3 - P10; P2 - P11; P11 - P8; P2 - P3; P2 - P8; P3 - P8              |
| TC1000007709.hg.1   | TC1000007709.hg.1 | NA                             | NA           | NA       | 13.624 | 0.00113 | 3.8706 | 0.00159 | ctrl - P10; ctrl - P11; ctrl - P3; ctrl - P8; P2 - P10; P2 - P11; P2 - P3; P2 - P8; P3 - P8                       |



|                               |                   |                                |              |          |            |                  |            |                  |                                                                                                                 |
|-------------------------------|-------------------|--------------------------------|--------------|----------|------------|------------------|------------|------------------|-----------------------------------------------------------------------------------------------------------------|
| TC1500007661.hg.1             | TC1500007661.hg.1 | slarzo.aAug10-<br>unspliced    | slarzo       | NA       | 13.61<br>8 | 0.00<br>013<br>5 | 3.86<br>97 | 0.00<br>016      | ctrl - P10; ctrl - P11; ctrl - P3; ctrl - P8; P2 - P10; P10 - P8; P2 - P11; P11 - P8; P2 - P3; P2 - P8; P3 - P8 |
| TC0200007133.hg.1             | TC0200007133.hg.1 | dawfa.aAug10-<br>unspliced     | dawfa        | NA       | 13.60<br>8 | 0.00<br>013<br>5 | 3.86<br>81 | 0.00<br>016      | ctrl - P10; ctrl - P11; ctrl - P3; ctrl - P8; P2 - P10; P3 - P10; P2 - P11; P11 - P8; P2 - P3; P2 - P8; P3 - P8 |
| TC2000007088.hg.1             | TC2000007088.hg.1 | NR_131907                      | ABALON       | 1.03E+08 | 13.60<br>2 | 0.00<br>013<br>6 | 3.86<br>71 | 0.00<br>016      | P10 - ctrl; P11 - ctrl; P3 - ctrl; P8 - ctrl; P10 - P11; P10 - P2; P10 - P3; P11 - P2; P3 - P2; P8 - P2         |
| TC1800007686.hg.1             | TC1800007686.hg.1 | veywar.aAug10-<br>unspliced    | veywar       | NA       | 13.60<br>1 | 0.00<br>013<br>6 | 3.86<br>7  | 0.00<br>016      | ctrl - P10; ctrl - P11; ctrl - P3; ctrl - P8; P2 - P10; P3 - P10; P2 - P11; P2 - P3; P2 - P8; P3 - P8           |
| TC1800008628.hg.1             | TC1800008628.hg.1 | NM_001039360                   | ZBTB7C       | 201501   | 13.50<br>8 | 0.00<br>014      | 3.85<br>23 | 0.00<br>016<br>6 | P11 - ctrl; ctrl - P2; P3 - ctrl; ctrl - P8; P11 - P10; P3 - P10; P11 - P2; P11 - P8; P3 - P2; P3 - P8          |
| TC0400012223.hg.1             | TC0400012223.hg.1 | slorfley.aAug10-<br>unspliced  | slorfley     | NA       | 13.50<br>5 | 0.00<br>014<br>1 | 3.85<br>19 | 0.00<br>016<br>6 | ctrl - P10; ctrl - P11; ctrl - P8; P2 - P10; P3 - P10; P2 - P11; P3 - P11; P2 - P3; P2 - P8; P3 - P8            |
| TC0500006811.hg.1             | TC0500006811.hg.1 | shorskoby.aAug10-<br>unspliced | shorskoby    | NA       | 13.49<br>3 | 0.00<br>014<br>1 | 3.85<br>1  | 0.00<br>016<br>6 | ctrl - P10; ctrl - P11; ctrl - P8; P2 - P10; P3 - P10; P2 - P11; P3 - P11; P2 - P3; P2 - P8; P3 - P8            |
| TC0300012054.hg.1             | TC0300012054.hg.1 | blorbobu.aAug10-<br>unspliced  | blorbobu     | NA       | 13.48<br>6 | 0.00<br>014<br>2 | 3.84<br>88 | 0.00<br>016<br>7 | ctrl - P10; ctrl - P11; ctrl - P8; P11 - P10; P2 - P10; P3 - P10; P2 - P11; P11 - P8; P2 - P3; P2 - P8; P3 - P8 |
| TC0X00007542.hg.1             | TC0X00007542.hg.1 | plerby.aAug10-<br>unspliced    | plerby       | NA       | 13.48<br>2 | 0.00<br>014<br>2 | 3.84<br>82 | 0.00<br>016<br>7 | ctrl - P10; ctrl - P11; ctrl - P3; ctrl - P8; P2 - P10; P2 - P11; P11 - P8; P2 - P3; P2 - P8; P3 - P8           |
| TC0600012815.hg.1             | TC0600012815.hg.1 | NM_001111298                   | PPIL6        | 285755   | 13.46<br>4 | 0.00<br>014<br>3 | 3.84<br>54 | 0.00<br>016<br>8 | ctrl - P10; ctrl - P2; ctrl - P3; ctrl - P8; P11 - P10; P2 - P10; P11 - P2; P11 - P3; P11 - P8                  |
| TC0300011079.hg.1             | TC0300011079.hg.1 | tuforbo.aAug10-<br>unspliced   | tuforbo      | NA       | 13.43<br>8 | 0.00<br>014<br>4 | 3.84<br>12 | 0.00<br>017      | ctrl - P10; ctrl - P11; ctrl - P3; ctrl - P8; P2 - P10; P3 - P10; P2 - P11; P2 - P3; P2 - P8                    |
| TC0200014856.hg.1             | TC0200014856.hg.1 | NA                             | NA           | NA       | 13.42<br>4 | 0.00<br>014<br>5 | 3.83<br>91 | 0.00<br>017      | ctrl - P10; ctrl - P3; ctrl - P8; P11 - P10; P2 - P10; P11 - P3; P11 - P8; P2 - P3; P2 - P8                     |
| TC1300007800.hg.1             | TC1300007800.hg.1 | jatoby.aAug10-<br>unspliced    | jatoby       | NA       | 13.42<br>2 | 0.00<br>014<br>5 | 3.83<br>87 | 0.00<br>017      | ctrl - P10; ctrl - P11; ctrl - P8; P2 - P10; P3 - P10; P2 - P11; P3 - P11; P2 - P3; P2 - P8; P3 - P8            |
| TC1500009922.hg.1             | TC1500009922.hg.1 | OTTHUMT00000474<br>076         | RP11-138H8.8 |          | 13.37<br>5 | 0.00<br>014<br>7 | 3.83<br>13 | 0.00<br>017<br>3 | ctrl - P10; ctrl - P11; ctrl - P3; ctrl - P8; P2 - P10; P3 - P10; P2 - P11; P3 - P11; P2 - P3; P2 - P8; P3 - P8 |
| HTA2-pos-<br>PSR02023980.hg.1 | 23151073          | NA                             | NA           | NA       | 13.36<br>9 | 0.00<br>014<br>8 | 3.83<br>04 | 0.00<br>017<br>4 | ctrl - P10; ctrl - P8; P11 - P10; P2 - P10; P3 - P10; P2 - P11; P11 - P8; P2 - P3; P2 - P8; P3 - P8             |
| TC0700012269.hg.1             | TC0700012269.hg.1 | hinare.aAug10-<br>unspliced    | hinare       | NA       | 13.36<br>9 | 0.00<br>014<br>8 | 3.83<br>03 | 0.00<br>017<br>4 | ctrl - P10; ctrl - P8; P11 - P10; P2 - P10; P3 - P10; P2 - P11; P11 - P8; P2 - P3; P2 - P8; P3 - P8             |
| TC1200012049.hg.1             | TC1200012049.hg.1 | humiri.aAug10-<br>unspliced    | humiri       | NA       | 13.36<br>6 | 0.00<br>014<br>8 | 3.82<br>99 | 0.00<br>017<br>4 | ctrl - P10; ctrl - P11; ctrl - P3; ctrl - P8; P2 - P10; P2 - P11; P11 - P8; P2 - P3; P2 - P8; P3 - P8           |
| TC1700007345.hg.1             | TC1700007345.hg.1 | ENST00000516474                | Vault        |          | 13.31<br>5 | 0.00<br>015<br>1 | 3.82<br>18 | 0.00<br>017<br>7 | ctrl - P10; ctrl - P11; ctrl - P8; P2 - P10; P3 - P10; P2 - P11; P2 - P3; P2 - P8; P3 - P8                      |
| TC0X00007420.hg.1             | TC0X00007420.hg.1 | wardaw.aAug10-<br>unspliced    | wardaw       | NA       | 13.29<br>5 | 0.00<br>015<br>2 | 3.81<br>85 | 0.00<br>017<br>8 | ctrl - P10; P2 - ctrl; ctrl - P8; P11 - P10; P2 - P10; P3 - P10; P2 - P11; P11 - P8; P2 - P3; P2 - P8; P3 - P8  |
| TC1500009336.hg.1             | TC1500009336.hg.1 | MYEF2.jAug10-<br>unspliced     | MYEF2        | NA       | 13.26<br>2 | 0.00<br>015<br>4 | 3.81<br>33 | 0.00<br>018      | ctrl - P10; ctrl - P11; ctrl - P3; ctrl - P8; P2 - P10; P2 - P11; P2 - P3; P2 - P8; P3 - P8                     |
| TC0300006575.hg.1             | TC0300006575.hg.1 | NM_001018115                   | FANCD2       | 2177     | 13.14<br>1 | 0.00<br>016<br>1 | 3.79<br>38 | 0.00<br>018<br>8 | P10 - ctrl; P8 - ctrl; P10 - P11; P10 - P2; P10 - P3; P8 - P11; P8 - P2; P8 - P3                                |
| TC0700013106.hg.1             | TC0700013106.hg.1 | leysmawbu.aAug10-<br>unspliced | leysmawbu    | NA       | 13.11<br>5 | 0.00<br>016<br>2 | 3.78<br>96 | 0.00<br>019      | ctrl - P10; ctrl - P11; ctrl - P3; ctrl - P8; P2 - P10; P2 - P11; P11 - P8; P2 - P3; P2 - P8                    |
| TC0X00010637.hg.1             | TC0X00010637.hg.1 | NA                             | NA           | NA       | 13.11<br>1 | 0.00<br>016<br>3 | 3.78<br>89 | 0.00<br>019      | P11 - ctrl; ctrl - P2; ctrl - P3; P11 - P10; P10 - P2; P10 - P3; P11 - P2; P11 - P3; P8 - P2; P8 - P3           |
| TC0900009462.hg.1             | TC0900009462.hg.1 | guroyby.aAug10-<br>unspliced   | guroyby      | NA       | 13.10<br>3 | 0.00<br>016<br>3 | 3.78<br>76 | 0.00<br>019<br>1 | ctrl - P10; ctrl - P8; P11 - P10; P2 - P10; P3 - P10; P11 - P8; P2 - P8; P3 - P8                                |
| TC0100009448.hg.1             | TC0100009448.hg.1 | gawkoybu.aAug10-<br>unspliced  | gawkoybu     | NA       | 13.10<br>1 | 0.00<br>016<br>3 | 3.78<br>74 | 0.00<br>019<br>1 | ctrl - P10; ctrl - P11; ctrl - P3; ctrl - P8; P2 - P10; P2 - P11; P2 - P3; P2 - P8; P3 - P8                     |
| TC0100012740.hg.1             | TC0100012740.hg.1 | reeplu.aAug10-<br>unspliced    | reeplu       | NA       | 13.09<br>8 | 0.00<br>016<br>3 | 3.78<br>68 | 0.00<br>019<br>1 | ctrl - P10; ctrl - P11; ctrl - P8; P2 - P10; P3 - P10; P2 - P11; P3 - P11; P2 - P8; P3 - P8                     |
| TC1700010547.hg.1             | TC1700010547.hg.1 | NA                             | NA           | NA       | 13.08<br>9 | 0.00<br>016<br>4 | 3.78<br>54 | 0.00<br>019<br>1 | ctrl - P10; ctrl - P11; ctrl - P3; ctrl - P8; P2 - P10; P2 - P11; P2 - P3; P2 - P8                              |
| TC0Y00007289.hg.1             | TC0Y00007289.hg.1 | rarsybo.aAug10-<br>unspliced   | rarsybo      | NA       | 13.08<br>4 | 0.00<br>016<br>4 | 3.78<br>47 | 0.00<br>019<br>2 | ctrl - P10; ctrl - P11; ctrl - P2; ctrl - P3; ctrl - P8; P11 - P10; P3 - P10; P11 - P2; P3 - P2                 |
| TC0300008806.hg.1             | TC0300008806.hg.1 | NA                             | NA           | NA       | 13.04<br>3 | 0.00<br>016<br>7 | 3.77<br>79 | 0.00<br>019<br>5 | ctrl - P10; ctrl - P8; P11 - P10; P2 - P10; P3 - P10; P2 - P11; P11 - P8; P2 - P3; P2 - P8; P3 - P8             |
| TC1000010729.hg.1             | TC1000010729.hg.1 | NA                             | NA           | NA       | 13.02<br>4 | 0.00<br>016<br>8 | 3.77<br>49 | 0.00<br>019<br>6 | ctrl - P10; ctrl - P11; ctrl - P3; ctrl - P8; P11 - P10; P2 - P10; P11 - P3; P11 - P8; P2 - P3; P2 - P8         |
| TC0400006886.hg.1             | TC0400006886.hg.1 | vafloy.aAug10-<br>unspliced    | vafloy       | NA       | 12.98<br>2 | 0.00<br>017<br>1 | 3.76<br>8  | 0.00<br>019<br>9 | ctrl - P10; ctrl - P11; ctrl - P3; ctrl - P8; P2 - P10; P11 - P3; P11 - P8; P2 - P3; P2 - P8                    |
| HTA2-pos-<br>47424482 st      | 23150858          | NA                             | NA           | NA       | 12.95<br>7 | 0.00<br>017<br>2 | 3.76<br>4  | 0.00<br>020<br>1 | ctrl - P10; ctrl - P11; ctrl - P3; ctrl - P8; P2 - P10; P2 - P11; P2 - P3; P2 - P8                              |

|                      |                   |                                 |               |    |             |                    |            |                  |                                                                                                                            |
|----------------------|-------------------|---------------------------------|---------------|----|-------------|--------------------|------------|------------------|----------------------------------------------------------------------------------------------------------------------------|
| TC0100010613.hg.1    | TC0100010613.hg.1 | gerkerbo.aAug10-<br>unspliced   | gerkerbo      | NA | 12.95<br>2  | 0.00<br>017<br>3   | 3.76<br>31 | 0.00<br>020<br>1 | ctrl - P11; ctrl - P8; P2 - P10; P3 - P10; P10 - P8; P2 - P11; P3 - P11; P11 - P8; P2 - P8; P3 - P8                        |
| TC1200007451.hg.1    | TC1200007451.hg.1 | NA                              | NA            | NA | 12.91<br>5  | 0.00<br>017<br>5   | 3.75<br>7  | 0.00<br>020<br>4 | ctrl - P10; ctrl - P11; ctrl - P3; ctrl - P8; P2 - P10; P2 - P11; P2 - P3; P2 - P8                                         |
| TC0700008748.hg.1    | TC0700008748.hg.1 | tawkaw.aAug10-<br>unspliced     | tawkaw        | NA | 12.89<br>1  | 0.00<br>017<br>7   | 3.75<br>31 | 0.00<br>020<br>5 | ctrl - P10; ctrl - P11; ctrl - P3; ctrl - P8; P2 - P10; P2 - P11; P11 - P8; P2 - P3; P2 - P8; P3 - P8                      |
| TC1400006465.hg.1    | TC1400006465.hg.1 | ENST00000612637                 | CTD-2314B22.2 | NA | 12.87<br>9  | 0.00<br>017<br>7   | 3.75<br>11 | 0.00<br>020<br>6 | ctrl - P10; ctrl - P11; ctrl - P8; P11 - P10; P2 - P10; P3 - P10; P11 - P8; P2 - P8; P3 - P8                               |
| HTA2-neg-47424450_st | 23150112          | NA                              | NA            | NA | 12.85<br>5  | 0.00<br>017<br>9   | 3.74<br>73 | 0.00<br>020<br>8 | ctrl - P10; ctrl - P11; ctrl - P3; ctrl - P8; P2 - P10; P2 - P11; P11 - P3; P11 - P8; P2 - P3; P2 - P8                     |
| TC0500013077.hg.1    | TC0500013077.hg.1 | pleystoybu.aAug10-<br>unspliced | pleystoybu    | NA | 12.83<br>8  | 0.00<br>018<br>45  | 3.74<br>45 | 0.00<br>020<br>9 | ctrl - P10; P2 - ctrl; ctrl - P8; P11 - P10; P2 - P10; P3 - P10; P2 - P11; P11 - P8; P2 - P3; P2 - P8; P3 - P8             |
| TC0300012067.hg.1    | TC0300012067.hg.1 | swarbobu.aAug10-<br>unspliced   | swarbobu      | NA | 12.81<br>7  | 0.00<br>018<br>2   | 3.74<br>11 | 0.00<br>021<br>1 | ctrl - P10; P2 - ctrl; ctrl - P8; P11 - P10; P2 - P10; P2 - P11; P11 - P8; P2 - P3; P2 - P8                                |
| TC1300009254.hg.1    | TC1300009254.hg.1 | snorfeeby.aAug10-<br>unspliced  | snorfeeby     | NA | 12.81<br>7  | 0.00<br>018<br>2   | 3.74<br>1  | 0.00<br>021<br>1 | ctrl - P10; P2 - ctrl; ctrl - P3; ctrl - P8; P2 - P10; P2 - P11; P11 - P8; P2 - P3; P2 - P8; P3 - P8                       |
| TC0300013686.hg.1    | TC0300013686.hg.1 | gleynarbo.aAug10-<br>unspliced  | gleynarbo     | NA | 12.81<br>2  | 0.00<br>018<br>2   | 3.74<br>02 | 0.00<br>021<br>1 | ctrl - P10; ctrl - P11; ctrl - P3; ctrl - P8; P2 - P10; P11 - P8; P2 - P3; P2 - P8                                         |
| TC0300006842.hg.1    | TC0300006842.hg.1 | jorfabo.aAug10-<br>unspliced    | jorfabo       | NA | 12.80<br>4  | 0.00<br>018<br>2   | 3.73<br>9  | 0.00<br>021<br>2 | ctrl - P10; ctrl - P11; ctrl - P8; P2 - P10; P3 - P10; P2 - P11; P3 - P11; P2 - P3; P2 - P8; P3 - P8                       |
| TC1200011477.hg.1    | TC1200011477.hg.1 | shawnar.aAug10-<br>unspliced    | shawnar       | NA | 12.73<br>2  | 0.00<br>018<br>8   | 3.72<br>7  | 0.00<br>021<br>7 | ctrl - P10; ctrl - P11; ctrl - P3; ctrl - P8; P11 - P10; P2 - P10; P3 - P10; P11 - P8; P2 - P8; P3 - P8                    |
| TC0200009077.hg.1    | TC0200009077.hg.1 | NA                              | NA            | NA | 12.69<br>5  | 0.00<br>019<br>08  | 3.72<br>08 | 0.00<br>022      | ctrl - P10; ctrl - P11; ctrl - P3; ctrl - P8; P11 - P10; P2 - P10; P11 - P8; P2 - P3; P2 - P8                              |
| TC0X00010959.hg.1    | TC0X00010959.hg.1 | NA                              | NA            | NA | 12.59<br>59 | 0.00<br>019<br>8   | 3.70<br>34 | 0.00<br>022<br>9 | ctrl - P10; ctrl - P3; ctrl - P8; P11 - P10; P2 - P10; P11 - P3; P11 - P8; P2 - P3; P2 - P8                                |
| TC1500007336.hg.1    | TC1500007336.hg.1 | chuzerbu.aAug10-<br>unspliced   | chuzerbu      | NA | 12.56<br>5  | 0.00<br>00<br>02   | 3.69<br>93 | 0.00<br>023<br>1 | ctrl - P10; ctrl - P11; ctrl - P8; P2 - P10; P3 - P10; P2 - P11; P2 - P3; P2 - P8                                          |
| TC0Y00006454.hg.1    | TC0Y00006454.hg.1 | spoybo.aAug10-<br>unspliced     | spoybo        | NA | 12.55<br>55 | 0.00<br>020<br>1   | 3.69<br>67 | 0.00<br>023<br>3 | P10 - ctrl; P11 - ctrl; P10 - P2; P10 - P3; P11 - P2; P11 - P3; P11 - P8; P8 - P2                                          |
| TC0300008326.hg.1    | TC0300008326.hg.1 | NA                              | NA            | NA | 12.53<br>3  | 0.00<br>020<br>2   | 3.69<br>38 | 0.00<br>023<br>4 | ctrl - P10; ctrl - P11; ctrl - P3; ctrl - P8; P11 - P10; P2 - P10; P3 - P10; P2 - P11; P11 - P8; P2 - P3; P2 - P8; P3 - P8 |
| TC1600008324.hg.1    | TC1600008324.hg.1 | teyzabu.aAug10-<br>unspliced    | teyzabu       | NA | 12.51<br>9  | 0.00<br>020<br>3   | 3.69<br>16 | 0.00<br>023<br>5 | ctrl - P10; ctrl - P3; ctrl - P8; P2 - P10; P2 - P11; P11 - P8; P2 - P3; P2 - P8                                           |
| TC1100007694.hg.1    | TC1100007694.hg.1 | flerny.aAug10-<br>unspliced     | flerny        | NA | 12.51<br>4  | 0.00<br>020<br>4   | 3.69<br>07 | 0.00<br>023<br>6 | ctrl - P10; ctrl - P11; ctrl - P3; ctrl - P8; P2 - P10; P10 - P8; P2 - P11; P11 - P8; P2 - P3; P2 - P8; P3 - P8            |
| TC1000011528.hg.1    | TC1000011528.hg.1 | NA                              | NA            | NA | 12.50<br>2  | 0.00<br>020<br>5   | 3.68<br>87 | 0.00<br>023<br>6 | P10 - ctrl; P11 - ctrl; P8 - ctrl; P10 - P2; P10 - P3; P11 - P2; P11 - P3; P8 - P2; P8 - P3                                |
| TC0300012214.hg.1    | TC0300012214.hg.1 | noberbu.aAug10-<br>unspliced    | noberbu       | NA | 12.49<br>9  | 0.00<br>020<br>5   | 3.68<br>81 | 0.00<br>023<br>7 | ctrl - P10; ctrl - P11; ctrl - P2; ctrl - P8; P3 - P10; P3 - P11; P3 - P2; P3 - P8                                         |
| TC0300006725.hg.1    | TC0300006725.hg.1 | NA                              | NA            | NA | 12.49<br>4  | 0.00<br>020<br>5   | 3.68<br>72 | 0.00<br>023<br>7 | ctrl - P10; P2 - ctrl; ctrl - P8; P2 - P10; P2 - P11; P11 - P8; P2 - P3; P2 - P8; P3 - P8                                  |
| TC0100009481.hg.1    | TC0100009481.hg.1 | wawleybo.aAug10-<br>unspliced   | wawleybo      | NA | 12.48<br>1  | 0.00<br>020<br>7   | 3.68<br>51 | 0.00<br>023<br>8 | ctrl - P10; ctrl - P11; ctrl - P3; ctrl - P8; P2 - P10; P2 - P11; P2 - P3; P2 - P8                                         |
| TC0400010996.hg.1    | TC0400010996.hg.1 | vogy.aAug10-<br>unspliced       | vogy          | NA | 12.47<br>5  | 0.00<br>020<br>7   | 3.68<br>41 | 0.00<br>023<br>9 | ctrl - P10; ctrl - P11; ctrl - P3; ctrl - P8; P2 - P10; P2 - P11; P2 - P3; P2 - P8                                         |
| TC0400008486.hg.1    | TC0400008486.hg.1 | spoklawby.aAug10-<br>unspliced  | spoklawby     | NA | 12.46<br>7  | 0.00<br>020<br>8   | 3.68<br>28 | 0.00<br>023<br>9 | ctrl - P10; ctrl - P3; ctrl - P8; P11 - P10; P2 - P10; P11 - P3; P11 - P8; P2 - P3; P2 - P8                                |
| TC1300008943.hg.1    | TC1300008943.hg.1 | pleychee.aAug10-<br>unspliced   | pleychee      | NA | 12.46<br>4  | 0.00<br>020<br>8   | 3.68<br>22 | 0.00<br>023<br>9 | ctrl - P10; ctrl - P3; ctrl - P8; P11 - P10; P2 - P10; P2 - P11; P11 - P8; P2 - P3; P2 - P8; P3 - P8                       |
| TC2000008426.hg.1    | TC2000008426.hg.1 | NA                              | NA            | NA | 12.43<br>2  | 0.00<br>021<br>021 | 3.67<br>68 | 0.00<br>024<br>2 | P11 - ctrl; P2 - ctrl; P11 - P10; P2 - P10; P11 - P3; P11 - P8; P2 - P3; P2 - P8                                           |
| TC1000010412.hg.1    | TC1000010412.hg.1 | plokleybu.aAug10-<br>unspliced  | plokleybu     | NA | 12.43<br>43 | 0.00<br>021<br>1   | 3.67<br>65 | 0.00<br>024<br>2 | ctrl - P10; ctrl - P11; ctrl - P3; ctrl - P8; P2 - P10; P2 - P11; P2 - P3; P2 - P8                                         |
| TC1200011149.hg.1    | TC1200011149.hg.1 | cheykuby.aAug10-<br>unspliced   | cheykuby      | NA | 12.41<br>3  | 0.00<br>021<br>2   | 3.67<br>37 | 0.00<br>024<br>4 | ctrl - P11; P2 - ctrl; ctrl - P8; P10 - P11; P2 - P10; P2 - P11; P3 - P11; P2 - P8; P3 - P8                                |
| TC1500007338.hg.1    | TC1500007338.hg.1 | meezo.aAug10-<br>unspliced      | meezo         | NA | 12.41<br>2  | 0.00<br>021<br>2   | 3.67<br>34 | 0.00<br>024<br>4 | ctrl - P10; ctrl - P11; P2 - ctrl; ctrl - P8; P2 - P10; P2 - P11; P2 - P3; P2 - P8                                         |
| TC0100013972.hg.1    | TC0100013972.hg.1 | steypobu.aAug10-<br>unspliced   | steypobu      | NA | 12.38<br>2  | 0.00<br>021<br>5   | 3.66<br>84 | 0.00<br>024<br>7 | ctrl - P10; ctrl - P11; P2 - ctrl; ctrl - P3; ctrl - P8; P2 - P10; P2 - P11; P2 - P3; P2 - P8                              |
| TC1300006739.hg.1    | TC1300006739.hg.1 | NA                              | NA            | NA | 12.37<br>6  | 0.00<br>021<br>5   | 3.66<br>75 | 0.00<br>024<br>7 | P10 - ctrl; P11 - ctrl; P8 - ctrl; P10 - P2; P10 - P3; P11 - P2; P11 - P3; P8 - P2; P8 - P3                                |
| TC1100007369.hg.1    | TC1100007369.hg.1 | karure.aAug10-<br>unspliced     | karure        | NA | 12.35<br>9  | 0.00<br>021<br>6   | 3.66<br>46 | 0.00<br>024<br>8 | ctrl - P10; ctrl - P3; ctrl - P8; P11 - P10; P2 - P10; P2 - P11; P11 - P8; P2 - P3; P2 - P8                                |

|                   |                   |                                       |                 |          |        |         |        |          |                                                                                                                   |
|-------------------|-------------------|---------------------------------------|-----------------|----------|--------|---------|--------|----------|-------------------------------------------------------------------------------------------------------------------|
| TC0700013296.hg.1 | TC0700013296.hg.1 | mazeyby.aAug10-<br>unspliced          | mazeyby         | NA       | 12.317 | 0.00022 | 3.6575 | 0.000252 | ctrl - P10; ctrl - P11; ctrl - P3; ctrl - P8; P2 - P10; P3 - P10; P2 - P11; P2 - P3; P2 - P8; P3 - P8             |
| TC0Y00007290.hg.1 | TC0Y00007290.hg.1 | vubo.aAug10-<br>unspliced             | vubo            | NA       | 12.307 | 0.00022 | 3.6558 | 0.000253 | ctrl - P10; ctrl - P11; ctrl - P2; ctrl - P8; P11 - P10; P3 - P10; P3 - P11; P3 - P2; P3 - P8                     |
| TC1000010388.hg.1 | TC1000010388.hg.1 | NA                                    | NA              | NA       | 12.296 | 0.00022 | 3.652  | 0.000254 | P2 - ctrl; P3 - ctrl; P2 - P10; P3 - P10; P2 - P11; P3 - P11; P2 - P8; P3 - P8                                    |
| TC0200008282.hg.1 | TC0200008282.hg.1 | PTCD3andSNORD94.vgAug10-<br>unspliced | PTCD3andSNORD94 | NA       | 12.265 | 0.00022 | 3.6485 | 0.000257 | ctrl - P10; ctrl - P11; ctrl - P3; ctrl - P8; P11 - P10; P2 - P10; P11 - P8; P2 - P3; P2 - P8; P3 - P8            |
| TC0800009770.hg.1 | TC0800009770.hg.1 | ENST00000623639                       | RP11-108A14.1   |          | 12.26  | 0.00022 | 3.645  | 0.000258 | ctrl - P10; ctrl - P8; P11 - P10; P2 - P10; P3 - P10; P2 - P11; P3 - P11; P11 - P8; P2 - P8; P3 - P8              |
| TC0700010121.hg.1 | TC0700010121.hg.1 | blukeeby.aAug10-<br>unspliced         | blukeeby        | NA       | 12.102 | 0.00024 | 3.6206 | 0.000274 | ctrl - P10; ctrl - P8; P2 - P10; P3 - P10; P2 - P11; P3 - P11; P2 - P8; P3 - P8                                   |
| TC0700010124.hg.1 | TC0700010124.hg.1 | klukeeby.aAug10-<br>unspliced         | klukeeby        | NA       | 12.102 | 0.00024 | 3.6206 | 0.000274 | ctrl - P10; ctrl - P8; P2 - P10; P3 - P10; P2 - P11; P3 - P11; P2 - P8; P3 - P8                                   |
| TC0300013422.hg.1 | TC0300013422.hg.1 | romera.aAug10-<br>unspliced           | romera          | NA       | 12.09  | 0.00024 | 3.6186 | 0.000275 | ctrl - P10; ctrl - P11; ctrl - P3; ctrl - P8; P2 - P10; P10 - P8; P2 - P11; P11 - P8; P2 - P3; P2 - P8; P3 - P8   |
| TC0500011302.hg.1 | TC0500011302.hg.1 | NA                                    | NA              | NA       | 12.05  | 0.00024 | 3.614  | 0.000279 | ctrl - P10; ctrl - P3; ctrl - P8; P11 - P10; P2 - P10; P2 - P11; P11 - P8; P2 - P3; P2 - P8                       |
| TC0200008540.hg.1 | TC0200008540.hg.1 | NR_103732                             | LOC100506076    | 1.01E+08 | 12.04  | 0.00024 | 3.6099 | 0.000281 | ctrl - P10; ctrl - P11; ctrl - P8; P2 - P10; P3 - P10; P2 - P11; P3 - P11; P2 - P8; P3 - P8                       |
| TC1000007372.hg.1 | TC1000007372.hg.1 | NA                                    | NA              | NA       | 12.028 | 0.00024 | 3.6078 | 0.000282 | P10 - ctrl; P2 - ctrl; P3 - ctrl; P10 - P11; P2 - P10; P10 - P8; P2 - P11; P3 - P11; P2 - P8; P3 - P8             |
| TC0100009048.hg.1 | TC0100009048.hg.1 | hsa_circ_0000092                      | RPL5            | NA       | 12.01  | 0.00024 | 3.6048 | 0.000284 | ctrl - P10; ctrl - P11; ctrl - P3; ctrl - P8; P2 - P10; P2 - P11; P2 - P3; P2 - P8                                |
| TC0400007939.hg.1 | TC0400007939.hg.1 | lergar.aAug10-<br>unspliced           | lergar          | NA       | 12.00  | 0.00024 | 3.6034 | 0.000284 | ctrl - P10; ctrl - P11; ctrl - P8; P2 - P10; P2 - P11; P11 - P8; P2 - P3; P2 - P8; P3 - P8                        |
| TC1700010911.hg.1 | TC1700010911.hg.1 | NA                                    | NA              | NA       | 12.00  | 0.00024 | 3.609  | 0.000284 | ctrl - P10; ctrl - P11; ctrl - P3; ctrl - P8; P2 - P10; P2 - P11; P2 - P3; P2 - P8; P3 - P8                       |
| TC1800008623.hg.1 | TC1800008623.hg.1 | paplor.aAug10-<br>unspliced           | paplor          | NA       | 11.94  | 0.00025 | 3.595  | 0.000291 | ctrl - P10; ctrl - P11; ctrl - P3; ctrl - P8; P2 - P10; P2 - P11; P2 - P3; P2 - P8                                |
| TC0100011367.hg.1 | TC0100011367.hg.1 | royaro.aAug10-<br>unspliced           | royaro          | NA       | 11.94  | 0.00025 | 3.593  | 0.000291 | ctrl - P10; ctrl - P11; ctrl - P3; ctrl - P8; P2 - P10; P3 - P10; P2 - P11; P2 - P8; P3 - P8                      |
| TC0100009846.hg.1 | TC0100009846.hg.1 | PDE4DIP.wgAug10-<br>unspliced         | PDE4DIP         | NA       | 11.93  | 0.00025 | 3.5911 | 0.000292 | ctrl - P10; ctrl - P11; ctrl - P3; ctrl - P8; P2 - P10; P3 - P10; P2 - P11; P2 - P3; P2 - P8; P3 - P8             |
| TC2200007630.hg.1 | TC2200007630.hg.1 | slufer.aAug10-<br>unspliced           | slufer          | NA       | 11.85  | 0.00026 | 3.574  | 0.000301 | ctrl - P10; ctrl - P11; P2 - ctrl; ctrl - P8; P2 - P10; P2 - P11; P2 - P3; P2 - P8                                |
| TC0400008145.hg.1 | TC0400008145.hg.1 | gerbubo.aAug10-<br>unspliced          | gerbubo         | NA       | 11.82  | 0.00026 | 3.5732 | 0.000304 | ctrl - P10; P11 - ctrl; ctrl - P3; P11 - P10; P2 - P10; P11 - P2; P11 - P3; P11 - P8; P2 - P3; P2 - P8            |
| TC2100007087.hg.1 | TC2100007087.hg.1 | saver.aAug10-<br>unspliced            | saver           | NA       | 11.80  | 0.00027 | 3.566  | 0.000307 | ctrl - P10; ctrl - P11; ctrl - P3; ctrl - P8; P2 - P10; P2 - P11; P2 - P3; P2 - P8                                |
| TC0900009842.hg.1 | TC0900009842.hg.1 | NA                                    | NA              | NA       | 11.80  | 0.00027 | 3.5685 | 0.000307 | ctrl - P10; ctrl - P3; ctrl - P8; P11 - P10; P2 - P10; P2 - P11; P11 - P8; P2 - P3; P2 - P8; P3 - P8              |
| TC1300008425.hg.1 | TC1300008425.hg.1 | sharnor.aAug10-<br>unspliced          | sharnor         | NA       | 11.77  | 0.00027 | 3.562  | 0.000311 | ctrl - P10; ctrl - P11; ctrl - P3; ctrl - P8; P2 - P10; P3 - P10; P2 - P11; P2 - P8; P3 - P8                      |
| TC1200007996.hg.1 | TC1200007996.hg.1 | swyner.aAug10-<br>unspliced           | swyner          | NA       | 11.76  | 0.00027 | 3.564  | 0.000312 | ctrl - P10; ctrl - P11; ctrl - P3; ctrl - P8; P2 - P10; P2 - P11; P11 - P3; P11 - P8; P2 - P3; P2 - P8            |
| TC0300008317.hg.1 | TC0300008317.hg.1 | poysweyby.aAug10-<br>unspliced        | poysweyby       | NA       | 11.75  | 0.00027 | 3.568  | 0.000312 | ctrl - P10; ctrl - P11; P2 - ctrl; ctrl - P3; ctrl - P8; P2 - P10; P2 - P11; P2 - P3; P2 - P8                     |
| TC0300012128.hg.1 | TC0300012128.hg.1 | NA                                    | NA              | NA       | 11.75  | 0.00027 | 3.565  | 0.000312 | ctrl - P10; ctrl - P11; ctrl - P3; ctrl - P8; P2 - P10; P2 - P11; P11 - P8; P2 - P3; P2 - P8                      |
| TC0200015226.hg.1 | TC0200015226.hg.1 | HIBCH.qAug10-<br>unspliced            | HIBCH           | NA       | 11.75  | 0.00027 | 3.565  | 0.000312 | ctrl - P10; ctrl - P11; ctrl - P3; ctrl - P8; P11 - P10; P2 - P10; P3 - P10; P2 - P11; P11 - P8; P2 - P3; P2 - P8 |
| TC1300006991.hg.1 | TC1300006991.hg.1 | plupa.aAug10-<br>unspliced            | plupa           | NA       | 11.74  | 0.00027 | 3.5574 | 0.000314 | ctrl - P10; ctrl - P11; ctrl - P8; P2 - P10; P2 - P11; P2 - P3; P2 - P8; P3 - P8                                  |
| TC0700008968.hg.1 | TC0700008968.hg.1 | nukemu.aAug10-<br>unspliced           | nukemu          | NA       | 11.72  | 0.00027 | 3.559  | 0.000316 | P10 - ctrl; P11 - ctrl; P8 - ctrl; P10 - P2; P10 - P3; P11 - P2; P11 - P3; P8 - P2; P8 - P3                       |
| TC0X00009141.hg.1 | TC0X00009141.hg.1 | beevar.aAug10-<br>unspliced           | beevar          | NA       | 11.69  | 0.00028 | 3.5488 | 0.00032  | ctrl - P10; ctrl - P11; ctrl - P3; ctrl - P8; P2 - P10; P2 - P11; P2 - P3; P2 - P8                                |
| TC0400007130.hg.1 | TC0400007130.hg.1 | gloygluby.aAug10-<br>unspliced        | gloygluby       | NA       | 11.68  | 0.00028 | 3.5473 | 0.000321 | ctrl - P11; P2 - ctrl; ctrl - P8; P2 - P10; P3 - P10; P2 - P11; P3 - P11; P2 - P8; P3 - P8                        |
| TC1700010966.hg.1 | TC1700010966.hg.1 | ENST00000580372.1                     | RP11-6N17.6     |          | 11.62  | 0.00029 | 3.5372 | 0.000329 | P10 - ctrl; P11 - ctrl; P3 - ctrl; P8 - ctrl; P10 - P2; P11 - P2; P3 - P2; P8 - P2                                |
| TC0100011094.hg.1 | TC0100011094.hg.1 | wawkorbo.aAug10-<br>unspliced         | wawkorbo        | NA       | 11.62  | 0.00029 | 3.5366 | 0.000329 | ctrl - P10; ctrl - P3; ctrl - P8; P11 - P10; P2 - P10; P11 - P3; P11 - P8; P2 - P3; P2 - P8                       |

|                   |                   |                               |            |        |            |             |              |             |                                                                                                                   |
|-------------------|-------------------|-------------------------------|------------|--------|------------|-------------|--------------|-------------|-------------------------------------------------------------------------------------------------------------------|
| TC1800007421.hg.1 | TC1800007421.hg.1 | neeser.aAug10-<br>unspliced   | neeser     | NA     | 11.60<br>4 | 0.00<br>3   | 0.00<br>33   | 0.00<br>1   | ctrl - P10; ctrl - P11; ctrl - P3; ctrl - P8; P11 - P10; P2 - P10; P2 - P11; P11 - P3; P11 - P8; P2 - P3; P2 - P8 |
| TC0700009340.hg.1 | TC0700009340.hg.1 | berbley.aAug10-<br>unspliced  | berbley    | NA     | 11.52<br>9 | 0.00<br>2   | 3.52<br>01   | 0.00<br>1   | ctrl - P10; ctrl - P11; ctrl - P3; ctrl - P8; P2 - P10; P2 - P11; P2 - P3; P2 - P8; P3 - P8                       |
| TC0800009983.hg.1 | TC0800009983.hg.1 | shorker.aAug10-<br>unspliced  | shorker    | NA     | 11.51<br>5 | 0.00<br>4   | 3.51<br>72   | 0.00<br>3   | ctrl - P10; ctrl - P11; ctrl - P3; ctrl - P8; P2 - P10; P2 - P11; P11 - P8; P2 - P3; P2 - P8; P3 - P8             |
| TC2200008471.hg.1 | TC2200008471.hg.1 | ENST00000526089.1             | RNF185-AS1 |        | 11.51<br>2 | 0.00<br>4   | 3.51<br>7    | 0.00<br>3   | P10 - ctrl; P11 - ctrl; P8 - ctrl; P10 - P2; P10 - P3; P11 - P2; P11 - P3; P8 - P2; P8 - P3                       |
| TC1000009284.hg.1 | TC1000009284.hg.1 | borma.aAug10-<br>unspliced    | borma      | NA     | 11.48<br>4 | 0.00<br>8   | 3.51<br>12   | 0.00<br>8   | ctrl - P10; ctrl - P8; P11 - P10; P2 - P10; P3 - P10; P11 - P8; P2 - P3; P2 - P8; P3 - P8                         |
| TC0100014024.hg.1 | TC0100014024.hg.1 | NA                            | NA         | NA     | 11.47<br>3 | 0.00<br>9   | 0.00<br>3.51 | 0.00<br>9   | ctrl - P10; ctrl - P11; ctrl - P3; ctrl - P8; P2 - P10; P2 - P11; P2 - P3; P2 - P8                                |
| TC0700007141.hg.1 | TC0700007141.hg.1 | NA                            | NA         | NA     | 11.44<br>7 | 0.00<br>2   | 3.50<br>54   | 0.00<br>2   | ctrl - P10; ctrl - P3; ctrl - P8; P11 - P10; P2 - P10; P3 - P10; P11 - P8; P2 - P3; P2 - P8; P3 - P8              |
| TC1900009179.hg.1 | TC1900009179.hg.1 | feezoy.aAug10-<br>unspliced   | feezoy     | NA     | 11.44<br>3 | 0.00<br>3   | 3.50<br>41   | 0.00<br>3   | ctrl - P10; ctrl - P11; ctrl - P3; ctrl - P8; P2 - P10; P2 - P11; P2 - P3; P2 - P8                                |
| TC1200007155.hg.1 | TC1200007155.hg.1 | snawchar.aAug10-<br>unspliced | snawchar   | NA     | 11.43<br>4 | 0.00<br>4   | 3.50<br>3    | 0.00<br>4   | ctrl - P10; ctrl - P11; ctrl - P3; ctrl - P8; P2 - P10; P2 - P11; P2 - P3; P2 - P8                                |
| TC0X00007403.hg.1 | TC0X00007403.hg.1 | beetoy.aAug10-<br>unspliced   | beetoy     | NA     | 11.41<br>7 | 0.00<br>6   | 3.49<br>99   | 0.00<br>6   | ctrl - P10; ctrl - P11; P2 - ctrl; ctrl - P8; P2 - P10; P3 - P10; P2 - P11; P3 - P11; P2 - P8; P3 - P8            |
| TC0500009416.hg.1 | TC0500009416.hg.1 | NA                            | NA         | NA     | 11.38<br>1 | 0.00<br>1   | 3.49<br>34   | 0.00<br>1   | ctrl - P10; ctrl - P11; ctrl - P3; ctrl - P8; P2 - P10; P2 - P11; P11 - P8; P2 - P3; P2 - P8                      |
| TC0900007500.hg.1 | TC0900007500.hg.1 | fleyshee.aAug10-<br>unspliced | fleyshee   | NA     | 11.37<br>9 | 0.00<br>1   | 3.49<br>31   | 0.00<br>2   | ctrl - P10; ctrl - P11; ctrl - P8; P2 - P10; P3 - P10; P2 - P11; P3 - P11; P2 - P3; P2 - P8; P3 - P8              |
| TC2200008352.hg.1 | TC2200008352.hg.1 | tovaw.aAug10-<br>unspliced    | tovaw      | NA     | 11.37<br>1 | 0.00<br>2   | 3.49<br>15   | 0.00<br>3   | ctrl - P10; ctrl - P11; ctrl - P3; ctrl - P8; P11 - P10; P2 - P10; P2 - P11; P11 - P8; P2 - P3; P2 - P8           |
| TC1100013095.hg.1 | TC1100013095.hg.1 | NR_126004                     | LOC283140  | 283140 | 11.35<br>8 | 0.00<br>4   | 3.48<br>92   | 0.00<br>4   | ctrl - P10; ctrl - P2; ctrl - P8; P11 - P10; P3 - P10; P11 - P2; P11 - P8; P3 - P2; P3 - P8                       |
| TC0500010850.hg.1 | TC0500010850.hg.1 | jeyflu.aAug10-<br>unspliced   | jeyflu     | NA     | 11.33<br>1 | 0.00<br>8   | 3.48<br>44   | 0.00<br>8   | ctrl - P10; P3 - ctrl; ctrl - P8; P2 - P10; P3 - P10; P3 - P11; P3 - P2; P2 - P8; P3 - P8                         |
| TC0200014724.hg.1 | TC0200014724.hg.1 | voly.aAug10-<br>unspliced     | voly       | NA     | 11.32<br>1 | 0.00<br>9   | 3.48<br>26   | 0.00<br>037 | ctrl - P10; ctrl - P11; ctrl - P8; P2 - P10; P3 - P10; P2 - P11; P2 - P3; P2 - P8; P3 - P8                        |
| TC0500009020.hg.1 | TC0500009020.hg.1 | NM_001112724                  | STK32A     | 5q32   | 11.30<br>4 | 0.00<br>2   | 3.47<br>95   | 0.00<br>2   | ctrl - P10; P11 - ctrl; P2 - ctrl; ctrl - P8; P11 - P10; P2 - P10; P3 - P10; P11 - P8; P2 - P8; P3 - P8           |
| TC2000006722.hg.1 | TC2000006722.hg.1 | syto.aAug10-<br>unspliced     | syto       | NA     | 11.29<br>6 | 0.00<br>3   | 3.47<br>8    | 0.00<br>3   | ctrl - P10; ctrl - P11; ctrl - P3; ctrl - P8; P2 - P10; P2 - P11; P2 - P3; P2 - P8                                |
| TC0100013271.hg.1 | TC0100013271.hg.1 | rawabo.aAug10-<br>unspliced   | rawabo     | NA     | 11.28<br>5 | 0.00<br>4   | 3.47<br>59   | 0.00<br>5   | ctrl - P10; ctrl - P11; ctrl - P8; P2 - P10; P3 - P10; P2 - P11; P2 - P3; P2 - P8; P3 - P8                        |
| TC0200007084.hg.1 | TC0200007084.hg.1 | tapubo.aAug10-<br>unspliced   | tapubo     | NA     | 11.26<br>1 | 0.00<br>8   | 3.47<br>16   | 0.00<br>9   | ctrl - P10; ctrl - P8; P11 - P10; P2 - P10; P3 - P10; P11 - P8; P2 - P8; P3 - P8                                  |
| TC0600009766.hg.1 | TC0600009766.hg.1 | NA                            | NA         | NA     | 11.25<br>7 | 0.00<br>8   | 3.47<br>09   | 0.00<br>9   | P10 - ctrl; P2 - ctrl; P8 - ctrl; P2 - P10; P2 - P11; P2 - P3; P2 - P8                                            |
| TC1500010548.hg.1 | TC1500010548.hg.1 | geetee.aAug10-<br>unspliced   | geetee     | NA     | 11.24<br>3 | 0.00<br>034 | 3.46<br>82   | 0.00<br>1   | ctrl - P10; ctrl - P3; ctrl - P8; P11 - P10; P2 - P10; P11 - P3; P11 - P8; P2 - P3; P2 - P8                       |
| TC0400008062.hg.1 | TC0400008062.hg.1 | NA                            | NA         | NA     | 11.16<br>6 | 0.00<br>1   | 3.45<br>43   | 0.00<br>3   | ctrl - P10; ctrl - P11; ctrl - P3; ctrl - P8; P2 - P10; P2 - P11; P2 - P3; P2 - P8                                |
| TC0400011109.hg.1 | TC0400011109.hg.1 | kygar.aAug10-<br>unspliced    | kygar      | NA     | 11.15<br>7 | 0.00<br>35  | 3.45<br>26   | 0.00<br>5   | ctrl - P10; ctrl - P11; ctrl - P8; P2 - P10; P3 - P10; P2 - P11; P3 - P11; P2 - P3; P2 - P8; P3 - P8              |
| TC0400006964.hg.1 | TC0400006964.hg.1 | NA                            | NA         | NA     | 11.13<br>6 | 0.00<br>6   | 3.44<br>87   | 0.00<br>8   | ctrl - P10; ctrl - P11; ctrl - P3; ctrl - P8; P2 - P10; P3 - P10; P2 - P11; P11 - P8; P2 - P3; P2 - P8; P3 - P8   |
| TC1200009979.hg.1 | TC1200009979.hg.1 | NA                            | NA         | NA     | 11.12<br>8 | 0.00<br>7   | 3.44<br>72   | 0.00<br>9   | P10 - ctrl; P3 - ctrl; P8 - ctrl; P10 - P11; P10 - P2; P8 - P11; P3 - P2; P8 - P2; P8 - P3                        |
| TC1300007797.hg.1 | TC1300007797.hg.1 | zeyzoy.aAug10-<br>unspliced   | zeyzoy     | NA     | 11.12<br>3 | 0.00<br>35  | 3.44<br>64   | 0.00<br>04  | ctrl - P10; ctrl - P11; ctrl - P3; ctrl - P8; P2 - P10; P10 - P8; P2 - P11; P11 - P8; P2 - P3; P2 - P8; P3 - P8   |
| TC0100011195.hg.1 | TC0100011195.hg.1 | zorkobu.aAug10-<br>unspliced  | zorkobu    | NA     | 11.10<br>9 | 0.00<br>036 | 3.44<br>38   | 0.00<br>2   | ctrl - P10; ctrl - P11; ctrl - P3; ctrl - P8; P2 - P10; P3 - P10; P2 - P11; P2 - P8                               |
| TC1200009256.hg.1 | TC1200009256.hg.1 | borgawby.aAug10-<br>unspliced | borgawby   | NA     | 11.07<br>9 | 0.00<br>5   | 3.43<br>82   | 0.00<br>7   | ctrl - P10; ctrl - P11; ctrl - P3; ctrl - P8; P2 - P10; P3 - P10; P2 - P11; P2 - P3; P2 - P8; P3 - P8             |
| TC1200012809.hg.1 | TC1200012809.hg.1 | NA                            | NA         | NA     | 11.01<br>3 | 0.00<br>5   | 3.42<br>6    | 0.00<br>9   | ctrl - P10; ctrl - P11; ctrl - P3; ctrl - P8; P2 - P10; P2 - P11; P2 - P3; P2 - P8; P3 - P8                       |
| TC1200010932.hg.1 | TC1200010932.hg.1 | voychy.aAug10-<br>unspliced   | voychy     | NA     | 10.97<br>8 | 0.00<br>38  | 3.41<br>95   | 0.00<br>5   | ctrl - P10; ctrl - P11; ctrl - P3; ctrl - P8; P2 - P10; P2 - P11; P11 - P8; P2 - P3; P2 - P8; P3 - P8             |
| TC0100013196.hg.1 | TC0100013196.hg.1 | serklor.aAug10-<br>unspliced  | serklor    | NA     | 10.93<br>8 | 0.00<br>38  | 3.41<br>2    | 0.00<br>2   | ctrl - P10; ctrl - P8; P2 - P10; P3 - P10; P2 - P11; P2 - P3; P2 - P8; P3 - P8                                    |

|                      |                   |                                 |              |       |         |        |         |                                                                                                                |
|----------------------|-------------------|---------------------------------|--------------|-------|---------|--------|---------|----------------------------------------------------------------------------------------------------------------|
| TC1800007191.hg.1    | TC1800007191.hg.1 | ENST00000623380                 | RP11-693M3.1 | 10.92 | 0.00038 | 3.4104 | 0.00043 | ctrl - P10; ctrl - P2; ctrl - P3; ctrl - P8; P11 - P10; P3 - P10; P11 - P2; P11 - P8; P2 - P8; P3 - P8         |
| TC0400007719.hg.1    | TC0400007719.hg.1 | uc062wzu.1                      | SNORA62      | 10.85 | 0.0001  | 3.3972 | 0.00046 | ctrl - P10; ctrl - P11; ctrl - P8; P2 - P10; P3 - P10; P2 - P11; P2 - P3; P2 - P8                              |
| TC0200011191.hg.1    | TC0200011191.hg.1 | NA                              | NA           | 10.84 | 0.00040 | 3.3954 | 0.00044 | ctrl - P10; ctrl - P3; ctrl - P8; P11 - P10; P2 - P10; P11 - P8; P2 - P3; P2 - P8                              |
| TC0100012765.hg.1    | TC0100012765.hg.1 | snawkubo.aAug10-<br>unspliced   | snawkubo     | 10.84 | 0.00040 | 3.3948 | 0.00044 | ctrl - P10; ctrl - P3; ctrl - P8; P11 - P10; P2 - P10; P2 - P11; P11 - P8; P2 - P3; P2 - P8; P3 - P8           |
| TC0300010995.hg.1    | TC0300010995.hg.1 | speeswerby.aAug10-<br>unspliced | speeswerby   | 10.83 | 0.00040 | 3.3922 | 0.00045 | ctrl - P10; ctrl - P11; ctrl - P8; P2 - P10; P3 - P10; P2 - P11; P3 - P11; P2 - P8; P3 - P8                    |
| TC0600007110.hg.1    | TC0600007110.hg.1 | NA                              | NA           | 10.81 | 0.00040 | 3.3885 | 0.00045 | P10 - ctrl; P2 - ctrl; P3 - ctrl; P8 - ctrl; P10 - P11; P2 - P11; P3 - P11; P8 - P11; P3 - P2                  |
| TC1900009545.hg.1    | TC1900009545.hg.1 | NA                              | NA           | 10.75 | 0.00042 | 3.377  | 0.00046 | P10 - ctrl; P11 - ctrl; P8 - ctrl; P10 - P2; P10 - P3; P11 - P2; P11 - P3; P8 - P2; P8 - P3                    |
| TC0200007158.hg.1    | TC0200007158.hg.1 | gleyjawbo.aAug10-<br>unspliced  | gleyjawbo    | 10.74 | 0.00042 | 3.3765 | 0.00046 | P10 - ctrl; P3 - ctrl; P8 - ctrl; P10 - P11; P10 - P2; P3 - P11; P8 - P11; P3 - P2; P8 - P2                    |
| TC1800008622.hg.1    | TC1800008622.hg.1 | shawsu.aAug10-<br>unspliced     | shawsu       | 10.74 | 0.00042 | 3.3763 | 0.00046 | ctrl - P10; ctrl - P3; ctrl - P8; P2 - P10; P2 - P11; P2 - P3; P2 - P8                                         |
| TC2000006689.hg.1    | TC2000006689.hg.1 | blosobu.aAug10-<br>unspliced    | blosobu      | 10.72 | 0.00042 | 3.3727 | 0.00047 | P10 - ctrl; P3 - ctrl; P8 - ctrl; P10 - P11; P10 - P2; P3 - P11; P3 - P2; P8 - P2                              |
| TC1200007016.hg.1    | TC1200007016.hg.1 | kugyby.aAug10-<br>unspliced     | kugyby       | 10.72 | 0.00042 | 3.3721 | 0.00047 | ctrl - P10; P2 - ctrl; ctrl - P8; P11 - P10; P2 - P10; P3 - P10; P2 - P11; P11 - P8; P2 - P3; P2 - P8; P3 - P8 |
| TC0900008687.hg.1    | TC0900008687.hg.1 | bleyplerbu.aAug10-<br>unspliced | bleyplerbu   | 10.72 | 0.00042 | 3.3717 | 0.00047 | ctrl - P10; ctrl - P11; ctrl - P3; ctrl - P8; P2 - P10; P2 - P11; P2 - P3; P2 - P8                             |
| TC0100010118.hg.1    | TC0100010118.hg.1 | NR_030281                       | MIR92B       | 67.5  | 0.00043 | 3.3625 | 0.00048 | ctrl - P10; ctrl - P2; ctrl - P3; ctrl - P8; P11 - P10; P11 - P2; P11 - P3; P11 - P8                           |
| HTA2-pos-47420544_st | 23150838          | NA                              | NA           | 10.64 | 0.00043 | 3.3577 | 0.00048 | ctrl - P10; ctrl - P3; ctrl - P8; P2 - P10; P2 - P11; P11 - P8; P2 - P3; P2 - P8                               |
| TC1100012689.hg.1    | TC1100012689.hg.1 | spolorby.aAug10-<br>unspliced   | spolorby     | 10.58 | 0.00045 | 3.3444 | 0.00050 | ctrl - P10; ctrl - P3; ctrl - P8; P2 - P10; P2 - P11; P11 - P8; P2 - P3; P2 - P8                               |
| TC0300009039.hg.1    | TC0300009039.hg.1 | uc062opo.1                      | RNU7-47P     | 10.56 | 0.00045 | 3.3418 | 0.00050 | ctrl - P10; ctrl - P11; ctrl - P8; P2 - P10; P3 - P10; P2 - P11; P3 - P11; P2 - P8; P3 - P8                    |
| TC0400008057.hg.1    | TC0400008057.hg.1 | gagy.aAug10-<br>unspliced       | gagy         | 10.55 | 0.00045 | 3.3401 | 0.00050 | ctrl - P10; ctrl - P11; ctrl - P8; P2 - P10; P3 - P10; P2 - P11; P3 - P11; P2 - P3; P2 - P8; P3 - P8           |
| TC0100014580.hg.1    | TC0100014580.hg.1 | NR_029707                       | MIR186       | 55.2  | 0.00045 | 3.339  | 0.00050 | ctrl - P10; ctrl - P11; ctrl - P3; ctrl - P8; P2 - P10; P2 - P11; P2 - P3; P2 - P8; P3 - P8                    |
| TC0300013282.hg.1    | TC0300013282.hg.1 | uc062qgt.1                      | RNA5SP149    | 10.54 | 0.00046 | 3.3371 | 0.00050 | P11 - ctrl; P2 - ctrl; P3 - ctrl; P11 - P10; P2 - P10; P3 - P10; P2 - P11; P11 - P8; P2 - P3; P2 - P8          |
| TC0X00009868.hg.1    | TC0X00009868.hg.1 | sneegy.aAug10-<br>unspliced     | sneegy       | 10.52 | 0.00046 | 3.3347 | 0.00051 | ctrl - P10; ctrl - P11; ctrl - P3; ctrl - P8; P2 - P10; P2 - P11; P2 - P3; P2 - P8                             |
| TC0700013109.hg.1    | TC0700013109.hg.1 | wahira.aAug10-<br>unspliced     | wahira       | 10.51 | 0.00046 | 3.3314 | 0.00051 | ctrl - P10; ctrl - P11; ctrl - P8; P2 - P10; P3 - P10; P2 - P11; P2 - P3; P2 - P8; P3 - P8                     |
| TC0200008244.hg.1    | TC0200008244.hg.1 | hsa_circ_0001034                | TGOLN2       | 10.48 | 0.00047 | 3.3261 | 0.00052 | P10 - ctrl; P11 - ctrl; P8 - ctrl; P10 - P2; P10 - P3; P11 - P2; P11 - P3; P8 - P2; P8 - P3                    |
| TC0600010865.hg.1    | TC0600010865.hg.1 | rarbtor.aAug10-<br>unspliced    | rarbtor      | 10.44 | 0.00048 | 3.318  | 0.00053 | ctrl - P10; ctrl - P11; ctrl - P8; P2 - P10; P3 - P10; P2 - P11; P11 - P8; P2 - P8; P3 - P8                    |
| TC0800011711.hg.1    | TC0800011711.hg.1 | gably.aAug10-<br>unspliced      | gably        | 10.38 | 0.00049 | 3.3066 | 0.00054 | ctrl - P10; ctrl - P11; ctrl - P3; ctrl - P8; P2 - P10; P2 - P11; P2 - P3; P2 - P8                             |
| TC0100008293.hg.1    | TC0100008293.hg.1 | siyuro.aAug10-<br>unspliced     | siyuro       | 10.38 | 0.00049 | 3.3066 | 0.00054 | ctrl - P10; ctrl - P11; ctrl - P3; ctrl - P8; P2 - P10; P2 - P11; P2 - P3; P2 - P8                             |
| TC0400011467.hg.1    | TC0400011467.hg.1 | swersnoby.aAug10-<br>unspliced  | swersnoby    | 10.35 | 0.00050 | 3.3009 | 0.00055 | ctrl - P10; ctrl - P11; ctrl - P3; ctrl - P8; P2 - P10; P2 - P11; P11 - P8; P2 - P3; P2 - P8; P3 - P8          |
| TC0200011198.hg.1    | TC0200011198.hg.1 | lergubo.aAug10-<br>unspliced    | lergubo      | 10.27 | 0.00051 | 3.2844 | 0.00057 | ctrl - P10; ctrl - P11; ctrl - P3; ctrl - P8; P2 - P10; P2 - P11; P11 - P8; P2 - P8; P3 - P8                   |
| TC1700006669.hg.1    | TC1700006669.hg.1 | NR_034082                       | LOC100130950 | 10.26 | 0.00052 | 3.284  | 0.00057 | ctrl - P10; ctrl - P3; ctrl - P8; P11 - P10; P2 - P10; P11 - P3; P11 - P8; P2 - P3; P2 - P8                    |
| TC0600007890.hg.1    | TC0600007890.hg.1 | smarjaw.aAug10-<br>unspliced    | smarjaw      | 10.26 | 0.00052 | 3.2825 | 0.00057 | ctrl - P11; P2 - ctrl; ctrl - P8; P2 - P10; P2 - P11; P3 - P11; P2 - P3; P2 - P8; P3 - P8                      |
| TC0900011480.hg.1    | TC0900011480.hg.1 | jugar.aAug10-<br>unspliced      | jugar        | 10.25 | 0.00052 | 3.2817 | 0.00057 | ctrl - P10; ctrl - P11; ctrl - P3; ctrl - P8; P11 - P10; P2 - P10; P3 - P10; P11 - P8; P2 - P8; P3 - P8        |
| TC0500008832.hg.1    | TC0500008832.hg.1 | rawsnobu.aAug10-<br>unspliced   | rawsnobu     | 10.23 | 0.00052 | 3.278  | 0.00058 | ctrl - P11; P2 - ctrl; ctrl - P8; P10 - P11; P2 - P10; P2 - P11; P3 - P11; P2 - P3; P2 - P8                    |
| TC1700011916.hg.1    | TC1700011916.hg.1 | fleyskee.aAug10-<br>unspliced   | fleyskee     | 10.21 | 0.00053 | 3.2744 | 0.00058 | ctrl - P10; ctrl - P11; ctrl - P3; ctrl - P8; P2 - P10; P3 - P10; P2 - P11; P2 - P3; P2 - P8; P3 - P8          |

|                   |                   |                                 |              |        |             |                    |            |                  |                                                                                                     |
|-------------------|-------------------|---------------------------------|--------------|--------|-------------|--------------------|------------|------------------|-----------------------------------------------------------------------------------------------------|
| TC0300011340.hg.1 | TC0300011340.hg.1 | skeynybo.aAug10-<br>unspliced   | skeynybo     | NA     | 10.21<br>1  | 0.00<br>053<br>3   | 3.27<br>3  | 0.00<br>058<br>6 | ctrl - P10; ctrl - P11; ctrl - P8; P2 - P10; P3 - P10; P2 - P11; P2 - P3; P2 - P8; P3 - P8          |
| TC1100012429.hg.1 | TC1100012429.hg.1 | klawchey.aAug10-<br>unspliced   | klawchey     | NA     | 10.20<br>7  | 0.00<br>053<br>5   | 3.27<br>2  | 0.00<br>058<br>7 | ctrl - P10; ctrl - P8; P11 - P10; P2 - P10; P3 - P10; P2 - P11; P11 - P8; P2 - P3; P2 - P8; P3 - P8 |
| TC1200008164.hg.1 | TC1200008164.hg.1 | skoyskarby.aAug10-<br>unspliced | skoyskarby   | NA     | 10.19<br>4  | 0.00<br>053<br>8   | 3.26<br>95 | 0.00<br>059      | ctrl - P10; ctrl - P11; ctrl - P3; ctrl - P8; P2 - P10; P2 - P11; P2 - P3; P2 - P8                  |
| TC0600007898.hg.1 | TC0600007898.hg.1 | lugloby.aAug10-<br>unspliced    | lugloby      | NA     | 10.18<br>9  | 0.00<br>053<br>9   | 3.26<br>86 | 0.00<br>059<br>1 | ctrl - P10; ctrl - P11; ctrl - P3; ctrl - P8; P2 - P10; P2 - P11; P2 - P3; P2 - P8; P3 - P8         |
| TC0700008380.hg.1 | TC0700008380.hg.1 | smusheyby.aAug10-<br>unspliced  | smusheyby    | NA     | 10.18<br>1  | 0.00<br>054<br>1   | 3.26<br>67 | 0.00<br>059<br>4 | ctrl - P10; ctrl - P11; ctrl - P8; P2 - P10; P3 - P10; P2 - P11; P3 - P11; P2 - P8; P3 - P8         |
| TC0900010579.hg.1 | TC0900010579.hg.1 | muploybu.aAug10-<br>unspliced   | muploybu     | NA     | 10.14<br>5  | 0.00<br>055<br>98  | 3.25<br>98 | 0.00<br>060<br>3 | ctrl - P10; ctrl - P11; ctrl - P8; P2 - P10; P3 - P10; P2 - P11; P2 - P8; P3 - P8                   |
| TC0700010990.hg.1 | TC0700010990.hg.1 | glawklarby.aAug10-<br>unspliced | glawklarby   | NA     | 10.11<br>11 | 0.00<br>055<br>9   | 3.25<br>29 | 0.00<br>061<br>2 | ctrl - P10; ctrl - P11; ctrl - P3; ctrl - P8; P2 - P10; P11 - P8; P2 - P3; P2 - P8                  |
| TC0300009744.hg.1 | TC0300009744.hg.1 | NA                              | NA           | NA     | 10.01<br>7  | 0.00<br>058<br>3   | 3.23<br>45 | 0.00<br>063<br>8 | ctrl - P10; ctrl - P11; ctrl - P3; ctrl - P8; P2 - P10; P2 - P11; P2 - P3; P2 - P8                  |
| TC1300007776.hg.1 | TC1300007776.hg.1 | dawsharbu.aAug10-<br>unspliced  | dawsharbu    | NA     | 10.00<br>5  | 0.00<br>058<br>6   | 3.23<br>2  | 0.00<br>064<br>2 | ctrl - P10; ctrl - P11; ctrl - P3; ctrl - P8; P2 - P10; P2 - P11; P2 - P3; P2 - P8                  |
| TC0200010481.hg.1 | TC0200010481.hg.1 | NR_003058                       | SNORD70      | 2q33.1 | 10.00<br>00 | 0.00<br>058<br>7   | 3.23<br>12 | 0.00<br>064<br>3 | ctrl - P10; ctrl - P3; P11 - P10; P2 - P10; P11 - P3; P11 - P8; P2 - P3                             |
| TC2000008219.hg.1 | TC2000008219.hg.1 | statu.aAug10-<br>unspliced      | statu        | NA     | 9.979<br>5  | 0.00<br>059<br>3   | 3.22<br>7  | 0.00<br>064<br>9 | ctrl - P10; ctrl - P11; ctrl - P3; ctrl - P8; P2 - P10; P2 - P11; P2 - P3; P2 - P8                  |
| TC0700012821.hg.1 | TC0700012821.hg.1 | skuku.aAug10-<br>unspliced      | skuku        | NA     | 9.978<br>8  | 0.00<br>059<br>3   | 3.22<br>68 | 0.00<br>064<br>9 | ctrl - P10; ctrl - P3; ctrl - P8; P2 - P10; P2 - P11; P11 - P8; P2 - P3; P2 - P8; P3 - P8           |
| TC0100011422.hg.1 | TC0100011422.hg.1 | kyply.aAug10-<br>unspliced      | kyply        | NA     | 9.930<br>8  | 0.00<br>060<br>6   | 3.21<br>72 | 0.00<br>066<br>3 | ctrl - P10; ctrl - P11; ctrl - P3; ctrl - P8; P2 - P10; P2 - P11; P2 - P3; P2 - P8                  |
| TC0100009227.hg.1 | TC0100009227.hg.1 | dymerbo.aAug10-<br>unspliced    | dymerbo      | NA     | 9.925<br>8  | 0.00<br>060<br>8   | 3.21<br>62 | 0.00<br>066<br>4 | P2 - ctrl; ctrl - P8; P2 - P10; P3 - P10; P2 - P11; P11 - P8; P2 - P8; P3 - P8                      |
| TC0700012166.hg.1 | TC0700012166.hg.1 | snawblee.aAug10-<br>unspliced   | snawblee     | NA     | 9.918<br>2  | 0.00<br>061<br>47  | 3.21<br>47 | 0.00<br>066<br>6 | ctrl - P10; ctrl - P8; P11 - P10; P2 - P10; P2 - P11; P11 - P8; P2 - P3; P2 - P8; P3 - P8           |
| TC1500007780.hg.1 | TC1500007780.hg.1 | blarta.aAug10-<br>unspliced     | blarta       | NA     | 9.914<br>2  | 0.00<br>061<br>1   | 3.21<br>39 | 0.00<br>066<br>7 | P10 - ctrl; P11 - ctrl; P3 - ctrl; P8 - ctrl; P10 - P2; P11 - P2; P3 - P2; P8 - P2                  |
| TC0700007871.hg.1 | TC0700007871.hg.1 | wergoy.aAug10-<br>unspliced     | wergoy       | NA     | 9.910<br>3  | 0.00<br>061<br>2   | 3.21<br>31 | 0.00<br>066<br>8 | ctrl - P10; ctrl - P11; ctrl - P3; ctrl - P8; P2 - P10; P2 - P11; P11 - P8; P2 - P3; P2 - P8        |
| TC1200006564.hg.1 | TC1200006564.hg.1 | DYRK4_vl.aAug10-<br>unspliced   | DYRK4_       | NA     | 9.890<br>3  | 0.00<br>061<br>8   | 3.20<br>91 | 0.00<br>067<br>4 | ctrl - P10; ctrl - P11; ctrl - P3; ctrl - P8; P2 - P10; P2 - P11; P2 - P8; P3 - P8                  |
| TC0200007037.hg.1 | TC0200007037.hg.1 | sweypybo.aAug10-<br>unspliced   | sweypybo     | NA     | 9.89<br>9   | 0.00<br>061<br>8   | 3.20<br>9  | 0.00<br>067<br>4 | ctrl - P10; ctrl - P8; P11 - P10; P2 - P10; P3 - P10; P11 - P8; P2 - P3; P2 - P8; P3 - P8           |
| TC0100008067.hg.1 | TC0100008067.hg.1 | marpla.aAug10-<br>unspliced     | marpla       | NA     | 9.880<br>5  | 0.00<br>062<br>1   | 3.20<br>71 | 0.00<br>067<br>6 | ctrl - P10; ctrl - P11; ctrl - P3; ctrl - P8; P2 - P10; P2 - P11; P2 - P3; P2 - P8                  |
| TC1200010027.hg.1 | TC1200010027.hg.1 | sheefy.aAug10-<br>unspliced     | sheefy       | NA     | 9.823<br>5  | 0.00<br>063<br>7   | 3.19<br>56 | 0.00<br>069<br>4 | ctrl - P10; ctrl - P3; ctrl - P8; P11 - P10; P2 - P10; P11 - P3; P11 - P8; P2 - P8                  |
| TC0500006447.hg.1 | TC0500006447.hg.1 | juskyby.aAug10-<br>unspliced    | juskyby      | NA     | 9.817<br>5  | 0.00<br>063<br>9   | 3.19<br>44 | 0.00<br>069<br>6 | ctrl - P10; ctrl - P11; ctrl - P8; P2 - P10; P3 - P10; P2 - P11; P3 - P11; P2 - P8; P3 - P8         |
| TC0900007418.hg.1 | TC0900007418.hg.1 | hsa_circ_0087128                | LOC100133920 |        | 9.817<br>3  | 0.00<br>063<br>9   | 3.19<br>43 | 0.00<br>069<br>6 | P10 - ctrl; P3 - ctrl; P8 - ctrl; P10 - P11; P3 - P11; P8 - P11; P3 - P2; P8 - P2                   |
| TC1400008344.hg.1 | TC1400008344.hg.1 | skerzey.aAug10-<br>unspliced    | skerzey      | NA     | 9.785<br>7  | 0.00<br>064<br>9   | 3.18<br>79 | 0.00<br>070<br>6 | ctrl - P10; ctrl - P11; ctrl - P3; ctrl - P8; P2 - P10; P2 - P11; P2 - P3; P2 - P8; P3 - P8         |
| TC1100010385.hg.1 | TC1100010385.hg.1 | NA                              | NA           | NA     | 9.77<br>7   | 0.00<br>065<br>1   | 3.18<br>61 | 0.00<br>070<br>8 | P2 - ctrl; P10 - P11; P2 - P10; P2 - P11; P2 - P3; P2 - P8                                          |
| TC2000006477.hg.1 | TC2000006477.hg.1 | teeja.aAug10-<br>unspliced      | teeja        | NA     | 9.770<br>5  | 0.00<br>065<br>3   | 3.18<br>48 | 0.00<br>071      | ctrl - P10; ctrl - P8; P11 - P10; P2 - P10; P3 - P10; P2 - P11; P2 - P3; P2 - P8; P3 - P8           |
| TC0700008378.hg.1 | TC0700008378.hg.1 | uc064fmi.1                      | RNU4-16P     | NA     | 9.716<br>2  | 0.00<br>067<br>067 | 3.17<br>38 | 0.00<br>072<br>8 | ctrl - P10; ctrl - P11; ctrl - P8; P2 - P10; P2 - P11; P2 - P3; P2 - P8; P3 - P8                    |
| TC1800007413.hg.1 | TC1800007413.hg.1 | hohoma.aAug10-<br>unspliced     | hohoma       | NA     | 9.709<br>6  | 0.00<br>067<br>2   | 3.17<br>24 | 0.00<br>073      | P2 - ctrl; ctrl - P3; P2 - P10; P2 - P11; P11 - P3; P2 - P3; P2 - P8                                |
| TC0800011319.hg.1 | TC0800011319.hg.1 | NA                              | NA           | NA     | 9.669<br>69 | 0.00<br>068<br>5   | 3.16<br>41 | 0.00<br>074<br>4 | ctrl - P10; ctrl - P11; ctrl - P8; P2 - P10; P2 - P11; P2 - P3; P2 - P8                             |
| TC0600013279.hg.1 | TC0600013279.hg.1 | fykloby.aAug10-<br>unspliced    | fykloby      | NA     | 9.649<br>8  | 0.00<br>069<br>2   | 3.16<br>02 | 0.00<br>075      | ctrl - P10; ctrl - P11; ctrl - P3; ctrl - P8; P2 - P10; P2 - P11; P11 - P8; P2 - P3; P2 - P8        |
| TC0300010819.hg.1 | TC0300010819.hg.1 | smaswerby.aAug10                | smaswerby    | NA     | 9.644<br>44 | 0.00<br>069<br>3   | 3.15<br>9  | 0.00<br>075<br>2 | P10 - ctrl; P11 - ctrl; P8 - ctrl; P10 - P2; P10 - P3; P11 - P2; P8 - P2; P8 - P3                   |
| TC1200008569.hg.1 | TC1200008569.hg.1 | teychu.aAug10-<br>unspliced     | teychu       | NA     | 9.638<br>8  | 0.00<br>069<br>5   | 3.15<br>79 | 0.00<br>075<br>4 | ctrl - P10; ctrl - P11; ctrl - P3; ctrl - P8; P2 - P10; P2 - P11; P2 - P3; P2 - P8                  |

|                   |                   |                                 |               |        |                |                    |                     |                     |                                                                                                       |
|-------------------|-------------------|---------------------------------|---------------|--------|----------------|--------------------|---------------------|---------------------|-------------------------------------------------------------------------------------------------------|
| TC0900009027.hg.1 | TC0900009027.hg.1 | uc064wsf.1                      | RNU5D-2P      | NA     | 9.6<br>32<br>6 | 0.00<br>069<br>7   | 3.15<br>075<br>67   | 0.00<br>075<br>6    | P10 - ctrl; P11 - ctrl; P2 - ctrl; P2 - P10; P2 - P11; P11 - P3; P2 - P3; P2 - P8                     |
| TC0800006787.hg.1 | TC0800006787.hg.1 | uc033bcu.2                      | AC068587.2    | NA     | 9.6<br>21<br>5 | 0.00<br>070<br>1   | 3.15<br>075<br>44   | 0.00<br>075<br>9    | ctrl - P10; ctrl - P3; ctrl - P8; P2 - P10; P2 - P11; P11 - P8; P2 - P3; P2 - P8                      |
| TC0300008467.hg.1 | TC0300008467.hg.1 | NM_020754                       | ARHGAP31      | 57514  | 9.5<br>85<br>3 | 0.00<br>071<br>3   | 3.14<br>077<br>69   | 0.00<br>077<br>2    | ctrl - P10; ctrl - P11; ctrl - P2; P3 - P10; P8 - P10; P3 - P11; P8 - P11; P3 - P2; P8 - P2           |
| TC1300007898.hg.1 | TC1300007898.hg.1 | ENST00000607072.1               | RP11-255P5.2  |        | 9.5<br>80<br>3 | 0.00<br>071<br>5   | 3.14<br>077<br>59   | 0.00<br>077<br>3    | ctrl - P10; ctrl - P11; ctrl - P8; P2 - P10; P3 - P10; P2 - P11; P2 - P8; P3 - P8                     |
| TC0300007208.hg.1 | TC0300007208.hg.1 | sorfeebu.aAug10-<br>unspliced   | sorfeebu      | NA     | 9.5<br>77<br>1 | 0.00<br>071<br>6   | 3.14<br>077<br>52   | 0.00<br>077<br>4    | ctrl - P10; ctrl - P3; ctrl - P8; P11 - P10; P2 - P10; P11 - P3; P11 - P8; P2 - P3; P2 - P8           |
| TC0100007768.hg.1 | TC0100007768.hg.1 | smarbu.aAug10-<br>unspliced     | smarbu        | NA     | 9.5<br>51<br>1 | 0.00<br>072<br>5   | 3.13<br>078<br>99   | 0.00<br>078<br>4    | ctrl - P10; ctrl - P11; ctrl - P3; ctrl - P8; P2 - P10; P2 - P11; P2 - P3; P2 - P8                    |
| TC1800006596.hg.1 | TC1800006596.hg.1 | setaru.aAug10-<br>unspliced     | setaru        | NA     | 9.5<br>38<br>4 | 0.00<br>072<br>9   | 3.13<br>078<br>72   | 0.00<br>078<br>8    | ctrl - P10; ctrl - P11; ctrl - P3; ctrl - P8; P2 - P10; P3 - P10; P2 - P11; P2 - P3; P2 - P8; P3 - P8 |
| TC0100015797.hg.1 | TC0100015797.hg.1 | POGZ.vfAug10-<br>unspliced      | POGZ          | NA     | 9.4<br>47<br>7 | 0.00<br>076<br>1   | 3.11<br>082<br>84   | 0.00<br>082<br>3    | ctrl - P10; ctrl - P11; ctrl - P8; P2 - P10; P3 - P10; P2 - P11; P3 - P11; P2 - P3; P2 - P8           |
| TC0100017978.hg.1 | TC0100017978.hg.1 | sparmeebu.aAug10-<br>unspliced  | sparmeebu     | NA     | 9.3<br>29<br>9 | 0.00<br>080<br>6   | 3.09<br>087<br>37   | 0.00<br>087<br>37   | ctrl - P10; ctrl - P11; ctrl - P8; P2 - P10; P2 - P11; P2 - P3; P2 - P8                               |
| TC0500009011.hg.1 | TC0500009011.hg.1 | klorflo.aAug10-<br>unspliced    | klorflo       | NA     | 9.2<br>86<br>9 | 0.00<br>082<br>3   | 3.08<br>088<br>47   | 0.00<br>088<br>8    | ctrl - P10; ctrl - P11; ctrl - P3; ctrl - P8; P2 - P10; P2 - P11; P2 - P3; P2 - P8                    |
| TC1500010107.hg.1 | TC1500010107.hg.1 | ENST00000624777                 | RP11-797A18.5 |        | 9.2<br>68<br>2 | 0.00<br>089<br>083 | 3.08<br>089<br>07   | 0.00<br>089<br>6    | ctrl - P10; ctrl - P11; ctrl - P3; ctrl - P8; P2 - P10; P2 - P11; P2 - P3; P2 - P8                    |
| TC0200007238.hg.1 | TC0200007238.hg.1 | flopardo.aAug10-<br>unspliced   | flopardo      | NA     | 9.2<br>38<br>4 | 0.00<br>084<br>3   | 3.07<br>090<br>44   | 0.00<br>090<br>9    | ctrl - P10; ctrl - P11; ctrl - P8; P2 - P10; P3 - P10; P2 - P11; P2 - P8; P3 - P8                     |
| TC0100017556.hg.1 | TC0100017556.hg.1 | geyklor.aAug10-<br>unspliced    | geyklor       | NA     | 9.1<br>94<br>5 | 0.00<br>086<br>1   | 3.06<br>092<br>51   | 0.00<br>092<br>8    | ctrl - P10; ctrl - P8; P11 - P10; P2 - P10; P3 - P10; P2 - P11; P11 - P8; P2 - P3; P2 - P8; P3 - P8   |
| TC0600013353.hg.1 | TC0600013353.hg.1 | sparfla.aAug10-<br>unspliced    | sparfla       | NA     | 9.1<br>65<br>8 | 0.00<br>087<br>3   | 3.05<br>094<br>9    | 0.00<br>094<br>1    | ctrl - P10; ctrl - P8; P11 - P10; P2 - P10; P3 - P10; P2 - P11; P11 - P8; P2 - P3; P2 - P8; P3 - P8   |
| TC0300012039.hg.1 | TC0300012039.hg.1 | jubobu.aAug10-<br>unspliced     | jubobu        | NA     | 9.1<br>23<br>8 | 0.00<br>089<br>1   | 3.05<br>096<br>3.05 | 0.00<br>096<br>3.05 | ctrl - P10; ctrl - P11; ctrl - P3; ctrl - P8; P2 - P10; P2 - P11; P2 - P3; P2 - P8                    |
| TC0200012341.hg.1 | TC0200012341.hg.1 | NA                              | NA            | NA     | 9.1<br>12<br>9 | 0.00<br>089<br>6   | 3.04<br>096<br>77   | 0.00<br>096<br>5    | P10 - ctrl; P2 - ctrl; P10 - P11; P10 - P3; P10 - P8; P2 - P11; P2 - P3; P2 - P8                      |
| TC1800008330.hg.1 | TC1800008330.hg.1 | NA                              | NA            | NA     | 9.1<br>12<br>6 | 0.00<br>089<br>6   | 3.04<br>096<br>75   | 0.00<br>096<br>5    | ctrl - P10; ctrl - P11; ctrl - P3; ctrl - P8; P2 - P10; P3 - P10; P2 - P11; P2 - P8; P3 - P8          |
| TC0500012058.hg.1 | TC0500012058.hg.1 | glawswawbu.aAug10-<br>unspliced | glawswawbu    | NA     | 9.1<br>07<br>9 | 0.00<br>089<br>8   | 3.04<br>096<br>66   | 0.00<br>096<br>6    | ctrl - P10; ctrl - P11; ctrl - P8; P2 - P10; P2 - P11; P2 - P8; P3 - P8                               |
| TC1500008846.hg.1 | TC1500008846.hg.1 | pargler.aAug10-<br>unspliced    | pargler       | NA     | 9.0<br>71<br>8 | 0.00<br>091<br>4   | 3.03<br>098<br>89   | 0.00<br>098<br>3    | ctrl - P10; P2 - ctrl; ctrl - P8; P2 - P10; P2 - P11; P11 - P8; P2 - P3; P2 - P8; P3 - P8             |
| TC1100010293.hg.1 | TC1100010293.hg.1 | uc057ztu.1                      | RNA5SP335     | NA     | 9.0<br>26<br>8 | 0.00<br>093<br>5   | 3.02<br>100<br>92   | 0.00<br>100<br>5    | P11 - ctrl; P2 - ctrl; P2 - P10; P2 - P11; P11 - P8; P2 - P3; P2 - P8                                 |
| TC1800008220.hg.1 | TC1800008220.hg.1 | stuwu.aAug10-<br>unspliced      | stuwu         | NA     | 9.0<br>09<br>9 | 0.00<br>094<br>3   | 3.02<br>101<br>55   | 0.00<br>101<br>3    | ctrl - P10; ctrl - P11; ctrl - P3; ctrl - P8; P2 - P10; P2 - P11; P2 - P3; P2 - P8                    |
| TC1500007391.hg.1 | TC1500007391.hg.1 | rarzo.aAug10-<br>unspliced      | rarzo         | NA     | 8.9<br>33<br>1 | 0.00<br>098<br>098 | 3.00<br>105<br>89   | 0.00<br>105<br>2    | ctrl - P10; ctrl - P11; ctrl - P3; ctrl - P8; P2 - P10; P3 - P10; P2 - P11; P2 - P8; P3 - P8          |
| TC0800008457.hg.1 | TC0800008457.hg.1 | NA                              | NA            | NA     | 8.8<br>55<br>9 | 0.00<br>101<br>8   | 2.99<br>109<br>21   | 0.00<br>109<br>3    | P10 - ctrl; P11 - ctrl; P8 - ctrl; P10 - P2; P10 - P3; P11 - P2; P3 - P2; P8 - P2; P8 - P3            |
| TC0600013737.hg.1 | TC0600013737.hg.1 | NA                              | NA            | NA     | 8.8<br>48<br>5 | 0.00<br>102<br>2   | 2.99<br>109<br>05   | 0.00<br>109<br>7    | ctrl - P10; ctrl - P8; P11 - P10; P2 - P10; P2 - P11; P11 - P8; P2 - P3; P2 - P8; P3 - P8             |
| TC0300013115.hg.1 | TC0300013115.hg.1 | mawkybu.aAug10-<br>unspliced    | mawkybu       | NA     | 8.8<br>45<br>8 | 0.00<br>102<br>4   | 2.98<br>109<br>99   | 0.00<br>109<br>8    | ctrl - P10; ctrl - P11; ctrl - P8; P2 - P10; P3 - P10; P2 - P11; P3 - P11; P2 - P8; P3 - P8           |
| TC0800011316.hg.1 | TC0800011316.hg.1 | dershoy.aAug10-<br>unspliced    | dershoy       | NA     | 8.8<br>41<br>9 | 0.00<br>102<br>6   | 2.98<br>109<br>9    | 0.00<br>111<br>11   | ctrl - P10; ctrl - P11; ctrl - P8; P2 - P10; P2 - P11; P2 - P3; P2 - P8; P3 - P8                      |
| TC0900010085.hg.1 | TC0900010085.hg.1 | glaskybu.aAug10-<br>unspliced   | glaskybu      | NA     | 8.8<br>20<br>7 | 0.00<br>103<br>7   | 2.98<br>111<br>44   | 0.00<br>111<br>1    | ctrl - P10; ctrl - P8; P2 - P10; P2 - P11; P11 - P8; P2 - P3; P2 - P8; P3 - P8                        |
| TC1600009136.hg.1 | TC1600009136.hg.1 | NA                              | NA            | NA     | 8.8<br>14<br>4 | 0.00<br>104<br>3   | 2.98<br>111<br>3    | 0.00<br>111<br>4    | P10 - ctrl; P11 - ctrl; P10 - P2; P10 - P3; P11 - P2; P11 - P3; P8 - P2; P8 - P3                      |
| TC0200009872.hg.1 | TC0200009872.hg.1 | zeekla.aAug10-<br>unspliced     | zeekla        | NA     | 8.8<br>09<br>6 | 0.00<br>104<br>2   | 2.98<br>111<br>2    | 0.00<br>111<br>6    | ctrl - P10; ctrl - P8; P11 - P10; P2 - P10; P3 - P10; P11 - P8; P2 - P8; P3 - P8                      |
| TC0500006712.hg.1 | TC0500006712.hg.1 | NR_003689                       | SNORD123      | 5p15.2 | 8.7<br>73<br>7 | 0.00<br>106<br>2   | 2.97<br>113<br>39   | 0.00<br>113<br>7    | ctrl - P10; ctrl - P2; ctrl - P8; P11 - P10; P3 - P10; P11 - P2; P11 - P8; P3 - P8                    |
| TC1900007800.hg.1 | TC1900007800.hg.1 | NA                              | NA            | NA     | 8.7<br>40<br>5 | 0.00<br>108<br>5   | 2.96<br>115<br>68   | 0.00<br>115<br>5    | ctrl - P10; ctrl - P11; ctrl - P3; ctrl - P8; P2 - P10; P2 - P3; P2 - P8                              |
| TC1600007187.hg.1 | TC1600007187.hg.1 | lysny.aAug10-<br>unspliced      | lysny         | NA     | 8.7<br>38<br>4 | 0.00<br>108<br>1   | 2.96<br>115<br>63   | 0.00<br>115<br>6    | ctrl - P10; ctrl - P3; ctrl - P8; P2 - P10; P2 - P11; P2 - P3; P2 - P8                                |

|                     |                   |                                 |               |    |                 |                   |                   |                    |                                                                                              |
|---------------------|-------------------|---------------------------------|---------------|----|-----------------|-------------------|-------------------|--------------------|----------------------------------------------------------------------------------------------|
| TC1000010300.hg.1   | TC1000010300.hg.1 | vonoyby.aAug10-<br>unspliced    | vonoyby       | NA | 8.7<br>32<br>2  | 0.00<br>108<br>4  | 2.96<br>115<br>49 | 0.00<br>115<br>9   | ctrl - P10; ctrl - P11; ctrl - P8; P2 - P10; P3 - P10; P2 - P11; P2 - P8; P3 - P8            |
| TC0Y00007305.hg.1   | TC0Y00007305.hg.1 | merbo.aAug10-<br>unspliced      | merbo         | NA | 8.7<br>13<br>6  | 0.00<br>109<br>4  | 2.96<br>116<br>08 | 0.00<br>116<br>9   | ctrl - P10; ctrl - P11; ctrl - P2; ctrl - P8; P11 - P10; P3 - P10; P3 - P2; P3 - P8          |
| TC0200009780.hg.1   | TC0200009780.hg.1 | darfarbu.aAug10-<br>unspliced   | darfarbu      | NA | 8.6<br>83<br>4  | 0.00<br>111<br>1  | 2.95<br>118<br>41 | 0.00<br>118<br>7   | ctrl - P10; P3 - ctrl; ctrl - P8; P3 - P10; P3 - P11; P3 - P2; P2 - P8; P3 - P8              |
| TC1800007417.hg.1   | TC1800007417.hg.1 | maser.aAug10-<br>unspliced      | maser         | NA | 8.6<br>42<br>7  | 0.00<br>113<br>5  | 2.94<br>121<br>51 | 0.00<br>121<br>1   | ctrl - P10; ctrl - P11; ctrl - P3; ctrl - P8; P2 - P10; P11 - P8; P2 - P3; P2 - P8           |
| TC2100007073.hg.1   | TC2100007073.hg.1 | ENST00000602568.1               | AP001429.1    |    | 8.6<br>37<br>3  | 0.00<br>113<br>8  | 2.94<br>121<br>39 | 0.00<br>121<br>4   | ctrl - P10; ctrl - P11; ctrl - P8; P2 - P10; P3 - P10; P2 - P11; P2 - P3; P2 - P8; P3 - P8   |
| TC0300011335.hg.1   | TC0300011335.hg.1 | klawnybo.aAug10-<br>unspliced   | klawnybo      | NA | 8.6<br>20<br>4  | 0.00<br>114<br>8  | 2.94<br>122<br>01 | 0.00<br>122<br>4   | ctrl - P10; ctrl - P3; ctrl - P8; P11 - P10; P2 - P10; P11 - P8; P2 - P3; P2 - P8            |
| TC1000008069.hg.1   | TC1000008069.hg.1 | geemarby.aAug10-<br>unspliced   | geemarby      | NA | 8.6<br>09<br>7  | 0.00<br>115<br>4  | 2.93<br>123<br>77 | 0.00<br>123<br>1   | ctrl - P10; ctrl - P11; ctrl - P8; P2 - P10; P3 - P10; P2 - P11; P3 - P11; P2 - P8; P3 - P8  |
| TC1900009862.hg.1   | TC1900009862.hg.1 | stoytobu.aAug10-<br>unspliced   | stoytobu      | NA | 8.6<br>07<br>4  | 0.00<br>115<br>6  | 2.93<br>123<br>72 | 0.00<br>123<br>1   | ctrl - P10; ctrl - P11; ctrl - P3; ctrl - P8; P2 - P10; P2 - P11; P2 - P3; P2 - P8           |
| TC0300008340.hg.1   | TC0300008340.hg.1 | NA                              | NA            | NA | 8.5<br>97<br>4  | 0.00<br>116<br>2  | 2.93<br>123<br>5  | 0.00<br>123<br>7   | ctrl - P10; ctrl - P11; ctrl - P8; P2 - P10; P2 - P11; P3 - P11; P2 - P3; P2 - P8; P3 - P8   |
| TC0200012315.hg.1   | TC0200012315.hg.1 | slrparbo.aAug10-<br>unspliced   | slrparbo      | NA | 8.5<br>81<br>6  | 0.00<br>117<br>1  | 2.93<br>124<br>14 | 0.00<br>124<br>7   | ctrl - P10; ctrl - P3; ctrl - P8; P2 - P10; P2 - P11; P2 - P3; P2 - P8                       |
| TC2200006889.hg.1   | TC2200006889.hg.1 | boror.aAug10-<br>unspliced      | boror         | NA | 8.4<br>77<br>4  | 0.00<br>123<br>6  | 2.90<br>131<br>8  | 0.00<br>131<br>5   | ctrl - P10; ctrl - P8; P2 - P10; P2 - P11; P2 - P3; P2 - P8                                  |
| TC2200008179.hg.1   | TC2200008179.hg.1 | C22orf43.vkAug10-<br>unspliced  | C22orf43      | NA | 8.4<br>58<br>1  | 0.00<br>124<br>8  | 2.90<br>132<br>37 | 0.00<br>132<br>8   | ctrl - P10; ctrl - P11; ctrl - P3; ctrl - P8; P2 - P10; P3 - P10; P2 - P8; P3 - P8           |
| TC0300012716.hg.1   | TC0300012716.hg.1 | ENST00000567714.1               | RP11-274H2.5  |    | 8.4<br>47<br>6  | 0.00<br>125<br>6  | 2.90<br>133<br>12 | 0.00<br>133<br>5   | ctrl - P10; ctrl - P3; ctrl - P8; P11 - P10; P2 - P10; P11 - P3; P11 - P8; P2 - P3; P2 - P8  |
| TC1600010550.hg.1   | TC1600010550.hg.1 | swerdu.aAug10-<br>unspliced     | swerdu        | NA | 8.4<br>23<br>2  | 0.00<br>127<br>1  | 2.89<br>135<br>58 | 0.00<br>135<br>1   | ctrl - P10; ctrl - P3; ctrl - P8; P11 - P10; P2 - P10; P11 - P3; P11 - P8; P2 - P8           |
| TC1200011939.hg.1   | TC1200011939.hg.1 | shofu.aAug10-<br>unspliced      | shofu         | NA | 8.4<br>21<br>7  | 0.00<br>127<br>2  | 2.89<br>135<br>54 | 0.00<br>135<br>2   | P2 - ctrl; ctrl - P8; P2 - P10; P3 - P10; P2 - P11; P3 - P11; P2 - P8; P3 - P8               |
| HTA2-pos-2999493_st | 23150279          | NA                              | NA            | NA | 8.4<br>00<br>8  | 0.00<br>128<br>6  | 2.89<br>136<br>07 | 0.00<br>136<br>6   | ctrl - P11; ctrl - P3; ctrl - P8; P2 - P10; P10 - P3; P2 - P11; P2 - P3; P2 - P8; P8 - P3    |
| TC0900010392.hg.1   | TC0900010392.hg.1 | NA                              | NA            | NA | 8.3<br>13<br>13 | 0.00<br>134<br>7  | 2.87<br>140<br>08 | 0.00<br>140<br>143 | ctrl - P10; ctrl - P11; ctrl - P3; ctrl - P8; P2 - P10; P2 - P11; P2 - P3; P2 - P8           |
| TC1200012052.hg.1   | TC1200012052.hg.1 | neygoyby.aAug10-<br>unspliced   | neygoyby      | NA | 8.3<br>01<br>3  | 0.00<br>135<br>5  | 2.86<br>143<br>8  | 0.00<br>143<br>8   | ctrl - P10; ctrl - P8; P11 - P10; P2 - P10; P3 - P10; P2 - P11; P2 - P3; P2 - P8             |
| TC0200011383.hg.1   | TC0200011383.hg.1 | ruyura.aAug10-<br>unspliced     | ruyura        | NA | 8.2<br>95<br>5  | 0.00<br>135<br>9  | 2.86<br>144<br>67 | 0.00<br>144<br>2   | ctrl - P10; ctrl - P3; ctrl - P8; P11 - P10; P2 - P10; P3 - P10; P11 - P8; P2 - P8; P3 - P8  |
| TC1500009808.hg.1   | TC1500009808.hg.1 | larsor.aAug10-<br>unspliced     | larsor        | NA | 8.2<br>88<br>2  | 0.00<br>136<br>5  | 2.86<br>144<br>5  | 0.00<br>144<br>7   | ctrl - P10; ctrl - P11; ctrl - P3; ctrl - P8; P2 - P10; P2 - P11; P2 - P3; P2 - P8           |
| TC0200014097.hg.1   | TC0200014097.hg.1 | sleykio.aAug10-<br>unspliced    | sleykio       | NA | 8.2<br>83<br>3  | 0.00<br>136<br>8  | 2.86<br>145<br>39 | 0.00<br>145<br>145 | ctrl - P10; ctrl - P11; ctrl - P3; ctrl - P8; P2 - P10; P2 - P11; P2 - P3; P2 - P8           |
| TC0400007494.hg.1   | TC0400007494.hg.1 | NA                              | NA            | NA | 8.2<br>66<br>1  | 0.00<br>138<br>1  | 2.85<br>146<br>99 | 0.00<br>146<br>3   | P2 - ctrl; P3 - ctrl; P2 - P10; P3 - P10; P2 - P11; P3 - P11; P2 - P8; P3 - P8               |
| TC1600008429.hg.1   | TC1600008429.hg.1 | swydo.aAug10-<br>unspliced      | swydo         | NA | 8.2<br>15<br>8  | 0.00<br>141<br>8  | 2.84<br>150<br>83 | 0.00<br>150<br>1   | ctrl - P11; ctrl - P8; P2 - P10; P2 - P11; P2 - P3; P2 - P8                                  |
| TC0100009197.hg.1   | TC0100009197.hg.1 | sayaro.aAug10-<br>unspliced     | sayaro        | NA | 8.1<br>99<br>1  | 0.00<br>143<br>1  | 2.84<br>151<br>45 | 0.00<br>151<br>4   | ctrl - P11; P2 - ctrl; ctrl - P8; P2 - P10; P2 - P11; P3 - P11; P2 - P3; P2 - P8; P3 - P8    |
| TC1100007754.hg.1   | TC1100007754.hg.1 | swyfer.aAug10-<br>unspliced     | swyfer        | NA | 8.1<br>92<br>6  | 0.00<br>143<br>6  | 2.84<br>151<br>3  | 0.00<br>151<br>9   | ctrl - P10; ctrl - P11; ctrl - P3; ctrl - P8; P2 - P10; P2 - P11; P2 - P3; P2 - P8           |
| TC0300009674.hg.1   | TC0300009674.hg.1 | weymubu.aAug10-<br>unspliced    | weymubu       | NA | 8.1<br>27<br>5  | 0.00<br>148<br>6  | 2.82<br>157<br>79 | 0.00<br>157<br>2   | ctrl - P3; ctrl - P8; P2 - P10; P11 - P3; P11 - P8; P2 - P3; P2 - P8                         |
| TC0400007296.hg.1   | TC0400007296.hg.1 | muglarby.aAug10-<br>unspliced   | muglarby      | NA | 8.0<br>89<br>8  | 0.00<br>151<br>7  | 2.81<br>160<br>91 | 0.00<br>160<br>3   | ctrl - P10; ctrl - P11; ctrl - P8; P2 - P10; P2 - P11; P2 - P3; P2 - P8                      |
| TC0500010459.hg.1   | TC0500010459.hg.1 | NA                              | NA            | NA | 8.0<br>77<br>2  | 0.00<br>152<br>7  | 2.81<br>161<br>62 | 0.00<br>161<br>4   | ctrl - P10; ctrl - P8; P11 - P10; P2 - P10; P11 - P8; P2 - P3; P2 - P8; P3 - P8              |
| TC1800008406.hg.1   | TC1800008406.hg.1 | OTTHUMT00000473296              | RP11-210K20.5 |    | 8.0<br>52<br>7  | 0.00<br>154<br>7  | 2.81<br>163<br>04 | 0.00<br>163<br>4   | ctrl - P11; ctrl - P3; ctrl - P8; P2 - P10; P10 - P8; P2 - P11; P2 - P3; P2 - P8             |
| TC0300006841.hg.1   | TC0300006841.hg.1 | garfabo.aAug10-<br>unspliced    | garfabo       | NA | 8.0<br>52<br>1  | 0.00<br>154<br>8  | 2.81<br>163<br>03 | 0.00<br>163<br>4   | ctrl - P10; ctrl - P11; ctrl - P8; P2 - P10; P3 - P10; P2 - P11; P2 - P3; P2 - P8; P3 - P8   |
| TC2100007567.hg.1   | TC2100007567.hg.1 | NA                              | NA            | NA | 8.0<br>17<br>9  | 0.00<br>157<br>7  | 2.80<br>166<br>23 | 0.00<br>166<br>4   | P10 - ctrl; P2 - ctrl; P3 - ctrl; P2 - P10; P2 - P11; P2 - P3; P2 - P8; P3 - P8              |
| TC1400007225.hg.1   | TC1400007225.hg.1 | sworcherbu.aAug10-<br>unspliced | sworcherbu    | NA | 8.0<br>13<br>9  | 0.00<br>158<br>13 | 2.80<br>166<br>13 | 0.00<br>166<br>7   | ctrl - P10; ctrl - P11; ctrl - P3; ctrl - P8; P2 - P10; P10 - P8; P2 - P11; P2 - P3; P2 - P8 |



|                             |                             |                                 |               |      |                |                  |            |                  |                                                                                             |
|-----------------------------|-----------------------------|---------------------------------|---------------|------|----------------|------------------|------------|------------------|---------------------------------------------------------------------------------------------|
| TC1000008929.hg.1           | TC1000008929.hg.1           | lermu.aAug10-<br>unspliced      | lermu         | NA   | 7.9<br>69<br>2 | 0.00<br>161<br>9 | 2.79<br>08 | 0.00<br>170<br>7 | P2 - ctrl; ctrl - P8; P2 - P10; P3 - P10; P2 - P11; P3 - P11; P2 - P8; P3 - P8              |
| TC0500012566.hg.1           | TC0500012566.hg.1           | vorsneebu.aAug10-<br>unspliced  | vorsneebu     | NA   | 7.8<br>99<br>9 | 0.00<br>168<br>1 | 2.77<br>44 | 0.00<br>177<br>2 | P10 - ctrl; P11 - ctrl; P3 - ctrl; P8 - ctrl; P10 - P2; P11 - P2; P8 - P2                   |
| TC0600011169.hg.1           | TC0600011169.hg.1           | NA                              | NA            | NA   | 7.8<br>78<br>5 | 0.00<br>170<br>1 | 2.76<br>94 | 0.00<br>179<br>2 | ctrl - P10; ctrl - P8; P2 - P10; P2 - P11; P11 - P8; P2 - P3; P2 - P8; P3 - P8              |
| TC0800011603.hg.1           | TC0800011603.hg.1           | smobly.aAug10-<br>unspliced     | smobly        | NA   | 7.8<br>74      | 0.00<br>170<br>5 | 2.76<br>83 | 0.00<br>179<br>6 | ctrl - P8; P2 - P10; P2 - P11; P11 - P8; P2 - P8; P3 - P8                                   |
| TC1700006768.hg.1           | TC1700006768.hg.1           | NM_001406                       | EFNB3         | 1949 | 7.8<br>45<br>8 | 0.00<br>173<br>2 | 2.76<br>16 | 0.00<br>182<br>3 | ctrl - P10; ctrl - P3; ctrl - P8; P11 - P10; P2 - P10; P11 - P3; P11 - P8; P2 - P3          |
| TC1000008905.hg.1           | TC1000008905.hg.1           | spypawby.aAug10-<br>unspliced   | spypawby      | NA   | 7.7<br>93<br>3 | 0.00<br>178<br>2 | 2.74<br>9  | 0.00<br>187<br>5 | ctrl - P10; ctrl - P11; ctrl - P3; ctrl - P8; P2 - P10; P2 - P11; P2 - P3; P2 - P8          |
| TC1700008114.hg.1           | TC1700008114.hg.1           | chawwabu.aAug10-<br>unspliced   | chawwabu      | NA   | 7.7<br>37<br>7 | 0.00<br>183<br>8 | 2.73<br>57 | 0.00<br>193<br>3 | ctrl - P10; ctrl - P3; ctrl - P8; P2 - P10; P2 - P11; P11 - P8; P2 - P3; P2 - P8            |
| TC0800009303.hg.1           | TC0800009303.hg.1           | NA                              | NA            | NA   | 7.6<br>81<br>7 | 0.00<br>189<br>6 | 2.72<br>22 | 0.00<br>199<br>3 | ctrl - P10; ctrl - P11; ctrl - P8; P2 - P10; P3 - P10; P2 - P11; P3 - P11; P2 - P8; P3 - P8 |
| TC0200008885.hg.1           | TC0200008885.hg.1           | steymoybo.aAug10-<br>unspliced  | steymoybo     | NA   | 7.6<br>73<br>5 | 0.00<br>190<br>5 | 2.72<br>02 | 0.00<br>200<br>2 | ctrl - P10; ctrl - P2; ctrl - P3; ctrl - P8; P11 - P3; P11 - P8                             |
| TC0700009180.hg.1           | TC0700009180.hg.1           | plawbleeby.aAug10-<br>unspliced | plawbleeby    | NA   | 7.6<br>20<br>6 | 0.00<br>196<br>2 | 2.70<br>73 | 0.00<br>206<br>1 | ctrl - P11; P2 - ctrl; ctrl - P8; P2 - P10; P2 - P11; P2 - P3; P2 - P8                      |
| TC0100015793.hg.1           | TC0100015793.hg.1           | POGZ.vjAug10-<br>unspliced      | POGZ          | NA   | 7.6<br>15<br>8 | 0.00<br>196<br>7 | 2.70<br>62 | 0.00<br>206<br>6 | ctrl - P10; ctrl - P3; ctrl - P8; P2 - P10; P2 - P11; P2 - P3; P2 - P8                      |
| TC0200010425.hg.1           | TC0200010425.hg.1           | NA                              | NA            | NA   | 7.5<br>97      | 0.00<br>198<br>8 | 2.70<br>16 | 0.00<br>208<br>7 | ctrl - P10; ctrl - P8; P11 - P10; P2 - P10; P3 - P10; P2 - P11; P2 - P8; P3 - P8            |
| TC0X00009556.hg.1           | TC0X00009556.hg.1           | nojy.aAug10-<br>unspliced       | nojy          | NA   | 7.5<br>69<br>4 | 0.00<br>201<br>9 | 2.69<br>48 | 0.00<br>211<br>8 | P10 - ctrl; P11 - ctrl; P8 - ctrl; P10 - P2; P10 - P3; P11 - P2; P11 - P3; P8 - P2; P8 - P3 |
| TC0700007346.hg.1           | TC0700007346.hg.1           | skeychoyby.aAug10-<br>unspliced | skeychoyby    | NA   | 7.5<br>62      | 0.00<br>202<br>8 | 2.69<br>3  | 0.00<br>212<br>6 | ctrl - P10; ctrl - P11; ctrl - P8; P3 - P10; P2 - P11; P3 - P11; P2 - P8; P3 - P8           |
| TC0Y00007294.hg.1           | TC0Y00007294.hg.1           | tobo.aAug10-<br>unspliced       | tobo          | NA   | 7.5<br>57<br>1 | 0.00<br>203<br>3 | 2.69<br>18 | 0.00<br>213<br>1 | ctrl - P10; ctrl - P11; ctrl - P2; ctrl - P8; P11 - P10; P3 - P10; P3 - P2; P3 - P8         |
| TC1200007263.hg.1           | TC1200007263.hg.1           | OTTHUMT00000474<br>581          | RP11-843B15.4 |      | 7.5<br>48      | 0.00<br>204<br>4 | 2.68<br>96 | 0.00<br>214<br>1 | ctrl - P10; ctrl - P11; P2 - P10; P3 - P10; P2 - P11; P3 - P11; P2 - P8; P3 - P8            |
| TC1200008708.hg.1           | TC1200008708.hg.1           | flublorbu.aAug10-<br>unspliced  | flublorbu     | NA   | 7.5<br>15<br>2 | 0.00<br>208<br>2 | 2.68<br>16 | 0.00<br>218      | ctrl - P10; P2 - ctrl; ctrl - P8; P2 - P10; P3 - P10; P2 - P11; P2 - P3; P2 - P8; P3 - P8   |
| TC1300008706.hg.1           | TC1300008706.hg.1           | ELF1.vdAug10-<br>unspliced      | ELF1          | NA   | 7.4<br>76<br>7 | 0.00<br>212<br>8 | 2.67<br>21 | 0.00<br>222<br>8 | ctrl - P10; ctrl - P3; ctrl - P8; P2 - P10; P2 - P11; P11 - P8; P2 - P3; P2 - P8            |
| TC0500009611.hg.1           | TC0500009611.hg.1           | maplaby.aAug10-<br>unspliced    | maplaby       | NA   | 7.4<br>71<br>1 | 0.00<br>213<br>5 | 2.67<br>07 | 0.00<br>223<br>4 | ctrl - P10; ctrl - P11; ctrl - P3; ctrl - P8; P2 - P10; P2 - P11; P2 - P3; P2 - P8          |
| TC0100018060.hg.1           | TC0100018060.hg.1           | fuvoybo.aAug10-<br>unspliced    | fuvoybo       | NA   | 7.4<br>66<br>7 | 0.00<br>214<br>7 | 2.66<br>96 | 0.00<br>223<br>8 | ctrl - P10; ctrl - P11; ctrl - P8; P2 - P10; P2 - P11; P2 - P8; P3 - P8                     |
| TC1600007501.hg.1           | TC1600007501.hg.1           | NA                              | NA            | NA   | 7.4<br>60<br>2 | 0.00<br>214<br>8 | 2.66<br>8  | 0.00<br>224<br>6 | P2 - ctrl; P2 - P10; P2 - P11; P2 - P3; P2 - P8                                             |
| TSUnmapped00000<br>920.hg.1 | TSUnmapped00000<br>920.hg.1 | NA                              | NA            | NA   | 7.4<br>37<br>7 | 0.00<br>217<br>5 | 2.66<br>25 | 0.00<br>227<br>4 | P11 - ctrl; P2 - ctrl; P11 - P10; P2 - P10; P11 - P8; P2 - P3; P2 - P8                      |
| TC0X00009774.hg.1           | TC0X00009774.hg.1           | merber.aAug10-<br>unspliced     | merber        | NA   | 7.4<br>13<br>8 | 0.00<br>220<br>5 | 2.65<br>65 | 0.00<br>230<br>4 | ctrl - P10; ctrl - P11; ctrl - P3; ctrl - P8; P2 - P10; P2 - P11; P2 - P3; P2 - P8          |
| TC0200010909.hg.1           | TC0200010909.hg.1           | NA                              | NA            | NA   | 7.4<br>03<br>7 | 0.00<br>221<br>8 | 2.65<br>4  | 0.00<br>231<br>6 | ctrl - P10; ctrl - P11; ctrl - P8; P2 - P10; P3 - P10; P11 - P8; P2 - P8; P3 - P8           |
| TC0300006704.hg.1           | TC0300006704.hg.1           | kodeybo.aAug10-<br>unspliced    | kodeybo       | NA   | 7.3<br>86      | 0.00<br>224<br>1 | 2.64<br>96 | 0.00<br>233<br>9 | ctrl - P10; ctrl - P8; P2 - P10; P11 - P8; P2 - P3; P2 - P8; P3 - P8                        |
| TC0700008327.hg.1           | TC0700008327.hg.1           | NA                              | NA            | NA   | 7.3<br>63<br>8 | 0.00<br>226<br>9 | 2.64<br>41 | 0.00<br>236<br>8 | ctrl - P10; ctrl - P3; ctrl - P8; P11 - P10; P2 - P10; P11 - P8; P2 - P3; P2 - P8           |
| TC0200015170.hg.1           | TC0200015170.hg.1           | NA                              | NA            | NA   | 7.3<br>30<br>5 | 0.00<br>231<br>3 | 2.63<br>58 | 0.00<br>241<br>3 | ctrl - P10; ctrl - P8; P11 - P10; P2 - P10; P11 - P3; P11 - P8; P2 - P3; P2 - P8            |
| TC0200008048.hg.1           | TC0200008048.hg.1           | rarkawbu.aAug10-<br>unspliced   | rarkawbu      | NA   | 7.3<br>05<br>2 | 0.00<br>234<br>7 | 2.62<br>95 | 0.00<br>244<br>7 | ctrl - P10; ctrl - P3; ctrl - P8; P11 - P10; P2 - P10; P11 - P3; P11 - P8; P2 - P8          |
| TC1000009986.hg.1           | TC1000009986.hg.1           | NA                              | NA            | NA   | 7.2<br>60<br>9 | 0.00<br>240<br>8 | 2.61<br>84 | 0.00<br>250<br>9 | ctrl - P10; ctrl - P3; ctrl - P8; P11 - P10; P2 - P10; P11 - P8; P2 - P8                    |
| TC0400012258.hg.1           | TC0400012258.hg.1           | fluplawby.aAug10-<br>unspliced  | fluplawby     | NA   | 7.2<br>53<br>5 | 0.00<br>241<br>8 | 2.61<br>65 | 0.00<br>251<br>9 | P11 - ctrl; P11 - P10; P10 - P2; P10 - P3; P11 - P2; P11 - P3; P11 - P8                     |
| TC1100006886.hg.1           | TC1100006886.hg.1           | seysloyby.aAug10-<br>unspliced  | seysloyby     | NA   | 7.2<br>5       | 0.00<br>242<br>3 | 2.61<br>56 | 0.00<br>252<br>3 | ctrl - P10; ctrl - P11; ctrl - P3; ctrl - P8; P2 - P10; P2 - P11; P2 - P3; P2 - P8          |
| TC0700007027.hg.1           | TC0700007027.hg.1           | flerslawbu.aAug10-<br>unspliced | flerslawbu    | NA   | 7.2<br>19      | 0.00<br>246<br>7 | 2.60<br>78 | 0.00<br>256<br>8 | ctrl - P10; P2 - ctrl; ctrl - P8; P2 - P10; P2 - P11; P11 - P8; P2 - P3; P2 - P8; P3 - P8   |

|                     |                   |                                   |              |        |                |                    |                   |                  |                                                                                             |
|---------------------|-------------------|-----------------------------------|--------------|--------|----------------|--------------------|-------------------|------------------|---------------------------------------------------------------------------------------------|
| TC0X00010424.hg.1   | TC0X00010424.hg.1 | ENST00000424887.1                 |              |        | 7.2<br>14<br>4 | 0.00<br>247<br>4   | 2.60<br>257<br>66 | 0.00<br>257<br>4 | ctrl - P10; ctrl - P11; ctrl - P3; ctrl - P8; P2 - P10; P2 - P11; P2 - P3; P2 - P8          |
|                     |                   |                                   | TCEAL3-AS1   |        |                |                    |                   |                  |                                                                                             |
|                     |                   | bybar.aAug10-<br>unspliced        | bybar        | NA     | 7.1<br>41<br>1 | 0.00<br>258<br>2   | 2.58<br>268<br>8  | 0.00<br>268<br>5 | ctrl - P10; ctrl - P3; ctrl - P8; P2 - P10; P11 - P8; P2 - P3; P2 - P8                      |
| TC0800007703.hg.1   | TC0800007703.hg.1 | NA                                | NA           | NA     | 7.1<br>30<br>6 | 0.00<br>259<br>8   | 2.58<br>270<br>54 | 0.00<br>270<br>1 | P10 - ctrl; P11 - ctrl; P8 - ctrl; P10 - P2; P10 - P3; P11 - P2; P11 - P3; P8 - P2; P8 - P3 |
| TC1700010263.hg.1   | TC1700010263.hg.1 | vawwybu.aAug10-<br>unspliced      | vawwybu      | NA     | 7.0<br>92<br>7 | 0.00<br>265<br>6   | 2.57<br>257<br>57 | 0.00<br>276      | ctrl - P10; ctrl - P11; ctrl - P8; P2 - P10; P2 - P11; P2 - P8; P3 - P8                     |
| TC0100010458.hg.1   | TC0100010458.hg.1 | zarorbo.aAug10-<br>unspliced      | zarorbo      | NA     | 7.0<br>64<br>8 | 0.00<br>270<br>1   | 2.56<br>280<br>86 | 0.00<br>280<br>5 | ctrl - P10; ctrl - P11; ctrl - P3; ctrl - P8; P2 - P10; P11 - P8; P2 - P8                   |
| TC0900010766.hg.1   | TC0900010766.hg.1 | shoyley.aAug10-<br>unspliced      | shoyley      |        | 7.0<br>63<br>2 | 0.00<br>270<br>3   | 2.56<br>280<br>82 | 0.00<br>280<br>6 | ctrl - P10; ctrl - P3; ctrl - P8; P11 - P10; P2 - P10; P11 - P8; P2 - P3; P2 - P8           |
| TC2000009054.hg.1   | TC2000009054.hg.1 | fleyroybu.aAug10-<br>unspliced    | fleyroybu    | NA     | 6.9<br>67<br>5 | 0.00<br>286<br>1   | 2.54<br>296<br>35 | 0.00<br>296<br>9 | ctrl - P10; ctrl - P8; P11 - P10; P2 - P10; P11 - P8; P2 - P3; P2 - P8; P3 - P8             |
| HTA2-pos-2985881_st | 23150245          | NA                                | NA           | NA     | 6.8<br>66<br>4 | 0.00<br>303<br>9   | 2.51<br>315<br>72 | 0.00<br>315<br>3 | ctrl - P10; ctrl - P8; P11 - P10; P2 - P10; P3 - P10; P11 - P8; P2 - P8                     |
| TC0700012273.hg.1   | TC0700012273.hg.1 | cherkaw.aAug10-<br>unspliced      | cherkaw      | NA     | 6.8<br>62<br>6 | 0.00<br>304<br>6   | 2.51<br>315<br>62 | 0.00<br>315<br>9 | P2 - ctrl; ctrl - P8; P2 - P10; P3 - P10; P2 - P11; P2 - P8; P3 - P8                        |
| TC0300007877.hg.1   | TC0300007877.hg.1 | rawsnoyby.aAug10-<br>unspliced    | rawsnoyby    | NA     | 6.8<br>39<br>3 | 0.00<br>308<br>9   | 2.51<br>320<br>01 | 0.00<br>320<br>2 | ctrl - P10; ctrl - P3; ctrl - P8; P2 - P10; P2 - P11; P2 - P3; P2 - P8                      |
| TC0700010358.hg.1   | TC0700010358.hg.1 | NM_176813                         | AGR3         | 155465 | 6.7<br>47<br>4 | 0.00<br>326<br>6   | 2.48<br>338<br>6  | 0.00<br>338<br>4 | P10 - ctrl; P8 - ctrl; P10 - P2; P11 - P2; P8 - P11; P3 - P2; P8 - P2                       |
| TC0X00007082.hg.1   | TC0X00007082.hg.1 | NA                                | NA           | NA     | 6.7<br>33<br>4 | 0.00<br>329<br>4   | 2.48<br>341<br>23 | 0.00<br>341<br>2 | ctrl - P10; ctrl - P11; ctrl - P3; ctrl - P8; P2 - P10; P2 - P11; P2 - P3; P2 - P8          |
| TC1600007273.hg.1   | TC1600007273.hg.1 | NA                                | NA           | NA     | 6.6<br>44<br>1 | 0.00<br>347<br>9   | 2.45<br>360<br>85 | 0.00<br>360<br>2 | ctrl - P10; ctrl - P3; ctrl - P8; P2 - P10; P2 - P11; P2 - P3; P2 - P8                      |
| TC1200010028.hg.1   | TC1200010028.hg.1 | NA                                | NA           | NA     | 6.5<br>74<br>7 | 0.00<br>363<br>1   | 2.43<br>375<br>99 | 0.00<br>375<br>8 | ctrl - P10; ctrl - P3; ctrl - P8; P11 - P10; P2 - P10; P11 - P3; P11 - P8; P2 - P3; P2 - P8 |
| TC0900009426.hg.1   | TC0900009426.hg.1 | kyplybu.aAug10-<br>unspliced      | kyplybu      | NA     | 6.5<br>01<br>7 | 0.00<br>380<br>38  | 2.42<br>393<br>02 | 0.00<br>393<br>1 | ctrl - P10; ctrl - P11; ctrl - P8; P2 - P10; P2 - P11; P2 - P3; P2 - P8                     |
| TC0X00006592.hg.1   | TC0X00006592.hg.1 | pyva.aAug10-<br>unspliced         | pyva         | NA     | 6.4<br>99<br>9 | 0.00<br>380<br>6   | 2.41<br>393<br>95 | 0.00<br>393<br>6 | ctrl - P10; ctrl - P8; P2 - P10; P3 - P10; P2 - P8; P3 - P8                                 |
| TC0500007948.hg.1   | TC0500007948.hg.1 | muhome.aAug10-<br>unspliced       | muhome       | NA     | 6.4<br>89<br>8 | 0.00<br>382<br>8   | 2.41<br>395<br>7  | 0.00<br>395<br>6 | ctrl - P8; P2 - P10; P2 - P11; P2 - P8; P3 - P8                                             |
| TC0400012069.hg.1   | TC0400012069.hg.1 | snawsnorby.aAug10-<br>unspliced   | snawsnorby   | NA     | 6.4<br>60<br>5 | 0.00<br>389<br>9   | 2.40<br>402<br>91 | 0.00<br>402<br>8 | ctrl - P10; ctrl - P8; P2 - P10; P2 - P11; P11 - P8; P2 - P3; P2 - P8                       |
| TC1700006519.hg.1   | TC1700006519.hg.1 | shaler.aAug10-<br>unspliced       | shaler       | NA     | 6.3<br>96<br>4 | 0.00<br>405<br>9   | 2.39<br>419<br>16 | 0.00<br>419<br>2 | P10 - ctrl; P11 - ctrl; P8 - ctrl; P10 - P2; P11 - P2; P11 - P3; P8 - P2                    |
| TC1800008630.hg.1   | TC1800008630.hg.1 | LOC100127909.aAug10-<br>unspliced | LOC100127909 | NA     | 6.3<br>61<br>4 | 0.00<br>409<br>415 | 2.38<br>428<br>2  | 0.00<br>428<br>4 | ctrl - P10; ctrl - P3; ctrl - P8; P11 - P10; P2 - P10; P11 - P3; P11 - P8; P2 - P3; P2 - P8 |
| TC0200007836.hg.1   | TC0200007836.hg.1 | NA                                | NA           | NA     | 6.3<br>35<br>6 | 0.00<br>421<br>8   | 2.37<br>435<br>49 | 0.00<br>435<br>2 | ctrl - P10; ctrl - P11; ctrl - P8; P2 - P10; P3 - P10; P2 - P11; P3 - P11; P2 - P8; P3 - P8 |
| TC0800008919.hg.1   | TC0800008919.hg.1 | kinara.aAug10-<br>unspliced       | kinara       | NA     | 6.2<br>81<br>9 | 0.00<br>436<br>5   | 2.36<br>450<br>2  | 0.00<br>450<br>2 | ctrl - P10; ctrl - P11; ctrl - P8; P2 - P10; P3 - P10; P2 - P11; P2 - P8                    |
| TC0700012151.hg.1   | TC0700012151.hg.1 | nerju.aAug10-<br>unspliced        | nerju        | NA     | 6.2<br>71<br>7 | 0.00<br>439<br>5   | 2.35<br>453<br>7  | 0.00<br>453<br>1 | ctrl - P10; ctrl - P11; ctrl - P8; P2 - P10; P2 - P11; P3 - P11; P2 - P8; P3 - P8           |
| TC0500007704.hg.1   | TC0500007704.hg.1 | chosmarbu.aAug10-<br>unspliced    | chosmarbu    | NA     | 6.2<br>66<br>6 | 0.00<br>440<br>9   | 2.35<br>454<br>56 | 0.00<br>454<br>2 | ctrl - P10; ctrl - P3; ctrl - P8; P11 - P10; P2 - P10; P11 - P3; P11 - P8; P2 - P3; P2 - P8 |
| TC0500007712.hg.1   | TC0500007712.hg.1 | blorsmarbu.aAug10-<br>unspliced   | blorsmarbu   | NA     | 6.2<br>66<br>6 | 0.00<br>440<br>9   | 2.35<br>454<br>56 | 0.00<br>454<br>2 | ctrl - P10; ctrl - P3; ctrl - P8; P11 - P10; P2 - P10; P11 - P3; P11 - P8; P2 - P3; P2 - P8 |
| TC0100006869.hg.1   | TC0100006869.hg.1 | kawnawbu.aAug10-<br>unspliced     | kawnawbu     | NA     | 6.2<br>36<br>5 | 0.00<br>449<br>3   | 2.34<br>462<br>74 | 0.00<br>462<br>7 | ctrl - P10; ctrl - P11; ctrl - P3; ctrl - P8; P2 - P10; P2 - P11; P2 - P8                   |
| TC0200008871.hg.1   | TC0200008871.hg.1 | fleeswarby.aAug10-<br>unspliced   | fleeswarby   | NA     | 6.2<br>34<br>4 | 0.00<br>449<br>9   | 2.34<br>463<br>68 | 0.00<br>463<br>1 | ctrl - P10; ctrl - P3; ctrl - P8; P11 - P10; P2 - P10; P11 - P3; P11 - P8; P2 - P3; P2 - P8 |
| TC0200007763.hg.1   | TC0200007763.hg.1 | studaw.aAug10-<br>unspliced       | studaw       | NA     | 6.2<br>05<br>6 | 0.00<br>458<br>3   | 2.33<br>471<br>88 | 0.00<br>471<br>5 | P2 - ctrl; ctrl - P8; P2 - P10; P3 - P10; P2 - P11; P11 - P8; P2 - P8; P3 - P8              |
| TC0200007414.hg.1   | TC0200007414.hg.1 | teraro.aAug10-<br>unspliced       | teraro       | NA     | 6.1<br>80<br>2 | 0.00<br>465<br>9   | 2.33<br>479<br>17 | 0.00<br>479<br>1 | ctrl - P10; ctrl - P8; P2 - P10; P2 - P11; P2 - P8; P3 - P8                                 |
| TC1700011455.hg.1   | TC1700011455.hg.1 | tuwaw.aAug10-<br>unspliced        | tuwaw        | NA     | 6.1<br>54<br>5 | 0.00<br>473<br>8   | 2.32<br>487<br>44 | 0.00<br>487<br>1 | ctrl - P11; P2 - P10; P2 - P11; P3 - P11; P2 - P3; P2 - P8                                  |
| TC0700007286.hg.1   | TC0700007286.hg.1 | soysmubu.aAug10-<br>unspliced     | soysmubu     | NA     | 6.1<br>39<br>9 | 0.00<br>478<br>2   | 2.32<br>491<br>04 | 0.00<br>491<br>3 | ctrl - P10; ctrl - P8; P2 - P10; P2 - P11; P2 - P3; P2 - P8                                 |
| TC0700010552.hg.1   | TC0700010552.hg.1 | snarcheeby.aAug10-<br>unspliced   | snarcheeby   | NA     | 6.1<br>02<br>7 | 0.00<br>489<br>9   | 2.30<br>503<br>99 | 0.00<br>503<br>1 | ctrl - P10; ctrl - P8; P11 - P10; P2 - P10; P11 - P8; P2 - P8; P3 - P8                      |

|                      |                   |                                 |               |    |                |                    |            |                  |                                                                                  |
|----------------------|-------------------|---------------------------------|---------------|----|----------------|--------------------|------------|------------------|----------------------------------------------------------------------------------|
| TC1600006981.hg.1    | TC1600006981.hg.1 | ferraw.aAug10-<br>unspliced     | ferraw        | NA | 6.0<br>10<br>5 | 0.00<br>520<br>2   | 2.28<br>38 | 0.00<br>534<br>1 | ctrl - P10; ctrl - P11; ctrl - P8; P2 - P10; P2 - P11; P2 - P8                   |
| TC0300011206.hg.1    | TC0300011206.hg.1 | deemoybo.aAug10-<br>unspliced   | deemoybo      | NA | 5.9<br>21<br>6 | 0.00<br>551<br>6   | 2.25<br>84 | 0.00<br>566<br>1 | ctrl - P10; ctrl - P8; P2 - P10; P2 - P11; P11 - P8; P2 - P8; P3 - P8            |
| TC0500006615.hg.1    | TC0500006615.hg.1 | charspoybu.aAug10-<br>unspliced | charspoybu    | NA | 5.8<br>40<br>5 | 0.00<br>582<br>2   | 2.23<br>5  | 0.00<br>597<br>2 | ctrl - P10; ctrl - P8; P2 - P10; P2 - P11; P2 - P3; P2 - P8                      |
| TC0300009501.hg.1    | TC0300009501.hg.1 | jorkarbu.aAug10-<br>unspliced   | jorkarbu      | NA | 5.7<br>83<br>5 | 0.00<br>604<br>8   | 2.21<br>84 | 0.00<br>620<br>2 | ctrl - P11; ctrl - P8; P2 - P10; P2 - P11; P3 - P11; P2 - P8; P3 - P8            |
| TC0600013128.hg.1    | TC0600013128.hg.1 | klarspawbu.aAug10-<br>unspliced | klarspawbu    | NA | 5.7<br>23<br>6 | 0.00<br>629<br>8   | 2.20<br>08 | 0.00<br>645<br>5 | ctrl - P8; P2 - P10; P3 - P10; P2 - P11; P3 - P11; P2 - P8; P3 - P8              |
| TC1200008822.hg.1    | TC1200008822.hg.1 | NA                              | NA            | NA | 5.6<br>13<br>2 | 0.00<br>678<br>9   | 2.16<br>82 | 0.00<br>695<br>6 | ctrl - P10; ctrl - P3; ctrl - P8; P2 - P10; P2 - P3; P2 - P8                     |
| TC0700012147.hg.1    | TC0700012147.hg.1 | NA                              | NA            | NA | 5.5<br>99<br>6 | 0.00<br>685<br>2   | 2.16<br>42 | 0.00<br>701<br>8 | ctrl - P10; ctrl - P11; ctrl - P3; ctrl - P8; P2 - P10; P2 - P8                  |
| TC1700009418.hg.1    | TC1700009418.hg.1 | NA                              | NA            | NA | 5.5<br>81<br>2 | 0.00<br>693<br>9   | 2.15<br>87 | 0.00<br>710<br>4 | ctrl - P10; ctrl - P11; ctrl - P8; P2 - P10; P2 - P11; P3 - P11; P2 - P8         |
| TC0200014720.hg.1    | TC0200014720.hg.1 | joyfarbu.aAug10-<br>unspliced   | joyfarbu      | NA | 5.5<br>04<br>8 | 0.00<br>731<br>5   | 2.13<br>58 | 0.00<br>748<br>5 | ctrl - P10; ctrl - P11; ctrl - P8; P2 - P10; P2 - P11; P2 - P3; P2 - P8          |
| TC0100014897.hg.1    | TC0100014897.hg.1 | blubar.aAug10-<br>unspliced     | blubar        | NA | 5.4<br>88<br>6 | 0.00<br>739<br>8   | 2.13<br>09 | 0.00<br>756<br>7 | P2 - ctrl; ctrl - P8; P2 - P10; P2 - P11; P2 - P3; P2 - P8; P3 - P8              |
| TC0400007451.hg.1    | TC0400007451.hg.1 | chergy.aAug10-<br>unspliced     | chergy        | NA | 5.4<br>61<br>2 | 0.00<br>770<br>754 | 2.12<br>27 | 0.00<br>770<br>9 | ctrl - P8; P2 - P10; P2 - P11; P2 - P3; P2 - P8                                  |
| TC0900010926.hg.1    | TC0900010926.hg.1 | NA                              | NA            | NA | 5.4<br>37<br>7 | 0.00<br>766<br>4   | 2.11<br>55 | 0.00<br>783<br>3 | ctrl - P10; ctrl - P8; P2 - P10; P2 - P11; P2 - P3; P2 - P8                      |
| TC0100008991.hg.1    | TC0100008991.hg.1 | pawkloy.aAug10-<br>unspliced    | pawkloy       | NA | 5.4<br>33<br>6 | 0.00<br>768<br>6   | 2.11<br>43 | 0.00<br>785<br>3 | ctrl - P10; ctrl - P8; P11 - P10; P2 - P10; P3 - P10; P11 - P8; P2 - P8; P3 - P8 |
| TC0600009713.hg.1    | TC0600009713.hg.1 | styjer.aAug10-<br>unspliced     | styjer        | NA | 5.3<br>61<br>6 | 0.00<br>808<br>4   | 2.09<br>24 | 0.00<br>825<br>6 | ctrl - P11; ctrl - P8; P2 - P10; P2 - P11; P2 - P3; P2 - P8                      |
| TC1500009360.hg.1    | TC1500009360.hg.1 | speyzu.aAug10-<br>unspliced     | speyzu        | NA | 5.3<br>43<br>9 | 0.00<br>818<br>5   | 2.08<br>7  | 0.00<br>835<br>6 | ctrl - P8; P2 - P10; P2 - P11; P2 - P8; P3 - P8                                  |
| TC0600012088.hg.1    | TC0600012088.hg.1 | ENST00000429053.1               | RP13-476E20.1 |    | 5.2<br>89<br>6 | 0.00<br>850<br>6   | 2.07<br>03 | 0.00<br>868      | ctrl - P10; ctrl - P2; ctrl - P3; ctrl - P8; P11 - P10                           |
| TC0200009433.hg.1    | TC0200009433.hg.1 | gorgabo.aAug10-<br>unspliced    | gorgabo       | NA | 5.2<br>06<br>4 | 0.00<br>902<br>6   | 2.04<br>45 | 0.00<br>920<br>6 | ctrl - P10; ctrl - P8; P11 - P10; P2 - P10; P11 - P8; P2 - P8; P3 - P8           |
| TC0300009210.hg.1    | TC0300009210.hg.1 | zeeforbo.aAug10-<br>unspliced   | zeeforbo      | NA | 5.1<br>33<br>2 | 0.00<br>951<br>3   | 2.02<br>17 | 0.00<br>969<br>9 | ctrl - P10; ctrl - P11; ctrl - P8; P2 - P10; P2 - P11; P2 - P3; P2 - P8          |
| TC1100010716.hg.1    | TC1100010716.hg.1 | charloby.aAug10-<br>unspliced   | charloby      | NA | 5.1<br>07<br>5 | 0.00<br>969<br>2   | 2.01<br>36 | 0.00<br>987<br>7 | ctrl - P10; ctrl - P11; ctrl - P3; ctrl - P8; P2 - P10; P2 - P11; P2 - P8        |
| HTA2-pos-2985916_st  | 23150251          | NA                              | NA            | NA | 5.0<br>85<br>5 | 0.00<br>984<br>7   | 2.00<br>67 | 0.01<br>003<br>2 | ctrl - P10; ctrl - P8; P2 - P10; P2 - P11; P2 - P8                               |
| HTA2-neg-47419654_st | 23149597          | NA                              | NA            | NA | 4.9<br>04<br>7 | 0.01<br>124<br>4   | 1.94<br>91 | 0.01<br>145<br>1 | ctrl - P10; ctrl - P8; P2 - P10; P2 - P11; P2 - P8; P3 - P8                      |
| TC2100007807.hg.1    | TC2100007807.hg.1 | NA                              | NA            | NA | 4.8<br>14<br>4 | 0.01<br>202<br>7   | 1.91<br>99 | 0.01<br>224<br>2 | ctrl - P10; ctrl - P11; ctrl - P8; P2 - P10; P2 - P11; P2 - P8                   |
| TC1200009922.hg.1    | TC1200009922.hg.1 | gloychu.aAug10-<br>unspliced    | gloychu       | NA | 4.8<br>03<br>9 | 0.01<br>212<br>2   | 1.91<br>64 | 0.01<br>233<br>4 | ctrl - P10; ctrl - P8; P2 - P10; P2 - P11; P2 - P3; P2 - P8                      |
| TC2200008360.hg.1    | TC2200008360.hg.1 | bleyter.aAug10-<br>unspliced    | bleyter       | NA | 4.8<br>02<br>7 | 0.01<br>213<br>2   | 1.91<br>61 | 0.01<br>234      | ctrl - P10; ctrl - P8; P2 - P10; P3 - P10; P2 - P11; P2 - P8; P3 - P8            |
| TC1000007352.hg.1    | TC1000007352.hg.1 | NA                              | NA            | NA | 4.6<br>55<br>4 | 0.01<br>356<br>3   | 1.86<br>76 | 0.01<br>379      | P2 - ctrl; P2 - P10; P2 - P11; P3 - P11; P2 - P8; P3 - P8                        |
| TC1100011571.hg.1    | TC1100011571.hg.1 | jymoy.aAug10-<br>unspliced      | jymoy         | NA | 4.5<br>91<br>4 | 0.01<br>424<br>5   | 1.84<br>63 | 0.01<br>447<br>7 | ctrl - P10; ctrl - P11; ctrl - P8; P2 - P8; P3 - P8                              |
| HTA2-pos-3475282_st  | 23150564          | NA                              | NA            | NA | 4.4<br>90<br>2 | 0.01<br>540<br>6   | 1.81<br>23 | 0.01<br>565      | ctrl - P3; ctrl - P8; P2 - P3; P2 - P8                                           |
| TC0X00008242.hg.1    | TC0X00008242.hg.1 | lorfey.aAug10-<br>unspliced     | lorfey        | NA | 4.4<br>58<br>5 | 0.01<br>579<br>2   | 1.80<br>16 | 0.01<br>603<br>6 | ctrl - P10; ctrl - P11; ctrl - P8; P2 - P10; P2 - P8; P3 - P8                    |
| TC0100014611.hg.1    | TC0100014611.hg.1 | ENST00000608748.1               | RP11-17E13.2  |    | 4.4<br>09<br>8 | 0.01<br>640<br>7   | 1.78<br>5  | 0.01<br>665<br>4 | ctrl - P10; ctrl - P8; P2 - P10; P3 - P10; P2 - P8                               |
| TC0600009592.hg.1    | TC0600009592.hg.1 | voyjer.aAug10-<br>unspliced     | voyjer        | NA | 4.3<br>27<br>5 | 0.01<br>701<br>751 | 1.75<br>67 | 0.01<br>776<br>5 | P10 - ctrl; P2 - ctrl; P10 - P3; P2 - P11; P2 - P3                               |
| TC1600006898.hg.1    | TC1600006898.hg.1 | OTTHUMT00000473762              | RP11-66H6.4   |    | 4.2<br>09<br>3 | 0.01<br>924<br>6   | 1.71<br>57 | 0.01<br>952      | ctrl - P11; ctrl - P8; P2 - P8; P3 - P8                                          |
| TC1800008211.hg.1    | TC1800008211.hg.1 | huhuma.aAug10-<br>unspliced     | huhuma        | NA | 4.1<br>44<br>2 | 0.02<br>028<br>6   | 1.69<br>28 | 0.02<br>056<br>6 | P10 - P11; P2 - P11; P3 - P11; P3 - P8                                           |

|                      |                   |                                |           |          |       |         |        |         |                                                                |
|----------------------|-------------------|--------------------------------|-----------|----------|-------|---------|--------|---------|----------------------------------------------------------------|
| TC1600007835.hg.1    | TC1600007835.hg.1 | NR_039672                      | MIR548AI  | 1.01E+08 | 4.125 | 0.02060 | 1.686  | 0.02088 | ctrl - P3; ctrl - P8; P2 - P3; P2 - P8                         |
| TC0100018008.hg.1    | TC0100018008.hg.1 | NA                             | NA        | NA       | 4.073 | 0.02148 | 1.668  | 0.02176 | ctrl - P8; P2 - P10; P2 - P11; P2 - P8; P3 - P8                |
| HTA2-neg-47419722_st | 23149624          | NA                             | NA        | NA       | 4.009 | 0.02265 | 1.6449 | 0.02293 | ctrl - P10; ctrl - P11; ctrl - P8; P2 - P10; P2 - P11; P2 - P8 |
| TC1100010690.hg.1    | TC1100010690.hg.1 | klomaw.aAug10-<br>unspliced    | klomaw    | NA       | 3.932 | 0.02415 | 1.6171 | 0.02444 | ctrl - P10; ctrl - P11; ctrl - P8; P2 - P10; P2 - P11; P2 - P8 |
| HTA2-pos-3581347_st  | 23150642          | NA                             | NA        | NA       | 3.895 | 0.02490 | 1.6037 | 0.0252  | P11 - P10; P11 - P2; P11 - P3; P8 - P2                         |
| TC1900008760.hg.1    | TC1900008760.hg.1 | NA                             | NA        | NA       | 3.768 | 0.02772 | 1.5571 | 0.02804 | ctrl - P10; P11 - P10; P11 - P3; P11 - P8                      |
| TC2100006860.hg.1    | TC2100006860.hg.1 | bosy.aAug10-<br>unspliced      | bosy      | NA       | 3.666 | 0.03027 | 1.519  | 0.03060 | ctrl - P10; ctrl - P11; ctrl - P3; ctrl - P8; P2 - P8          |
| TC0100014777.hg.1    | TC0100014777.hg.1 | smornerbu.aAug10-<br>unspliced | smornerbu | NA       | 3.596 | 0.03214 | 1.4929 | 0.03248 | ctrl - P10; ctrl - P11; ctrl - P8; P2 - P10; P2 - P11; P2 - P8 |
| TC0500008234.hg.1    | TC0500008234.hg.1 | spoka.aAug10-<br>unspliced     | spoka     | NA       | 3.559 | 0.03321 | 1.4787 | 0.03354 | ctrl - P10; ctrl - P11; ctrl - P8; P2 - P10; P2 - P11; P2 - P8 |
| HTA2-neg-47424282_st | 23150092          | NA                             | NA        | NA       | 3.468 | 0.03599 | 1.4437 | 0.03634 | ctrl - P10; P2 - P10; P3 - P10                                 |
| TC0300013091.hg.1    | TC0300013091.hg.1 | NA                             | NA        | NA       | 3.398 | 0.03830 | 1.4167 | 0.03866 | ctrl - P8; P11 - P8; P2 - P8                                   |
| HTA2-pos-3371087_st  | 23150499          | NA                             | NA        | NA       | 3.268 | 0.04305 | 1.366  | 0.04343 | ctrl - P2; P10 - P2; P11 - P2; P3 - P2; P8 - P2                |
| TC0600011223.hg.1    | TC0600011223.hg.1 | NA                             | NA        | NA       | 3.135 | 0.04866 | 1.3128 | 0.04907 | P10 - ctrl; P3 - ctrl; P8 - ctrl                               |

Supplementary Table 2A: Upregulated Gene Set Enrichment Analysis for 2478 probes identified by ANOVA with nominal p-value < 0.05.

| GS                                                                      | Size | ES   | NES  | NOM p-val | FDR q-val | FWER p-val | Rank at Max | Leading Edge                  |
|-------------------------------------------------------------------------|------|------|------|-----------|-----------|------------|-------------|-------------------------------|
| HES2_TARGET_GENES                                                       | 81   | 0.96 | 1.12 | 0.001     | 1         | 1          | 62          | tags=1%, list=3%, signal=1%   |
| GOZGIT_ESR1_TARGETS_DN                                                  | 103  | 0.95 | 1.11 | 0.002     | 1         | 1          | 45          | tags=1%, list=2%, signal=1%   |
| CREIGHTON_ENDOCRINE_THERAPY_RESISTANCE_1                                | 51   | 0.96 | 1.12 | 0.003     | 1         | 1          | 62          | tags=4%, list=3%, signal=4%   |
| ISL1_TARGET_GENES                                                       | 41   | 0.97 | 1.13 | 0.005     | 1         | 1          | 45          | tags=2%, list=2%, signal=2%   |
| MIR335_3P                                                               | 50   | 0.96 | 1.12 | 0.007     | 1         | 1          | 62          | tags=2%, list=3%, signal=2%   |
| PCGF2_TARGET_GENES                                                      | 43   | 0.96 | 1.13 | 0.008     | 1         | 1          | 45          | tags=2%, list=2%, signal=2%   |
| BLANCO_MELO_BRONCHIAL_EPITHELIAL_CELLS_INFLUENZA_A_DEL_NS1_INFECTION_UP | 55   | 0.96 | 1.12 | 0.01      | 1         | 1          | 62          | tags=2%, list=3%, signal=2%   |
| SOX3_TARGET_GENES                                                       | 24   | 0.97 | 1.15 | 0.022     | 1         | 1          | 45          | tags=4%, list=2%, signal=4%   |
| HNF4_Q6                                                                 | 17   | 0.98 | 1.16 | 0.023     | 1         | 1          | 45          | tags=6%, list=2%, signal=6%   |
| GRAESSMANN_APOPTOSIS_BY_SERUM_DEPRIVATION_UP                            | 42   | 0.96 | 1.12 | 0.024     | 1         | 1          | 72          | tags=2%, list=3%, signal=2%   |
| WAMUNYOKOLI_OVARIAN_CANCER_LMP_UP                                       | 14   | 0.98 | 1.17 | 0.029     | 1         | 1          | 45          | tags=7%, list=2%, signal=7%   |
| HAND1E47_01                                                             | 15   | 0.98 | 1.18 | 0.03      | 1         | 1          | 45          | tags=7%, list=2%, signal=7%   |
| GATA1_02                                                                | 22   | 0.97 | 1.14 | 0.031     | 1         | 1          | 62          | tags=5%, list=3%, signal=5%   |
| SANSOM_APC_TARGETS                                                      | 15   | 0.97 | 1.17 | 0.032     | 1         | 1          | 45          | tags=7%, list=2%, signal=7%   |
| GATAAGR_GATA_C                                                          | 19   | 0.97 | 1.15 | 0.032     | 1         | 1          | 62          | tags=5%, list=3%, signal=5%   |
| ZNF610_TARGET_GENES                                                     | 26   | 0.96 | 1.14 | 0.033     | 1         | 1          | 62          | tags=4%, list=3%, signal=4%   |
| SMID_BREAST_CANCER_BASAL_DN                                             | 57   | 0.94 | 1.09 | 0.036     | 1         | 1          | 62          | tags=2%, list=3%, signal=2%   |
| MIR4699_3P                                                              | 31   | 0.96 | 1.12 | 0.036     | 1         | 1          | 62          | tags=3%, list=3%, signal=3%   |
| <a href="#">WAMUNYOKOLI_OVARIAN_CANCER_GRADES_1_2_UP</a>                | 12   | 0.98 | 1.18 | 0.038     | 1         | 1          | 45          | tags=8%, list=2%, signal=8%   |
| MIR613                                                                  | 17   | 0.97 | 1.15 | 0.038     | 1         | 1          | 62          | tags=6%, list=3%, signal=6%   |
| MIR33A_3P                                                               | 23   | 0.96 | 1.14 | 0.038     | 1         | 1          | 62          | tags=4%, list=3%, signal=4%   |
| TATAAA_TATA_01                                                          | 68   | 0.93 | 1.09 | 0.038     | 1         | 1          | 62          | tags=3%, list=3%, signal=3%   |
| CDX2_Q5                                                                 | 14   | 0.98 | 1.17 | 0.039     | 1         | 1          | 45          | tags=7%, list=2%, signal=7%   |
| <a href="#">LIEN_BREAST_CARCINOMA_METAPLASTIC_VS_DUCTAL_DN</a>          | 7    | 0.98 | 1.23 | 0.04      | 1         | 1          | 45          | tags=14%, list=2%, signal=15% |
| POU2AF1_TARGET_GENES                                                    | 38   | 0.95 | 1.11 | 0.04      | 1         | 1          | 62          | tags=3%, list=3%, signal=3%   |
| <a href="#">KUMAR_PATHOGEN_LOAD_BY_MACROPHAGES</a>                      | 9    | 0.97 | 1.22 | 0.042     | 1         | 1          | 45          | tags=11%, list=2%, signal=11% |
| KIM_BIPOLAR_DISORDER_OLIGODENDROCYTE_DENSITY_CORR_UP                    | 18   | 0.96 | 1.14 | 0.043     | 1         | 1          | 72          | tags=6%, list=3%, signal=6%   |
| NAB2_TARGET_GENES                                                       | 36   | 0.95 | 1.11 | 0.043     | 1         | 1          | 62          | tags=3%, list=3%, signal=3%   |
| KIM_ALL_DISORDERS_OLIGODENDROCYTE_NUMBER_CORR_UP                        | 24   | 0.96 | 1.14 | 0.045     | 1         | 1          | 72          | tags=4%, list=3%, signal=4%   |
| DLX2_TARGET_GENES                                                       | 16   | 0.98 | 1.16 | 0.045     | 1         | 1          | 45          | tags=6%, list=2%, signal=6%   |
| TTGTAG_MIR520D                                                          | 18   | 0.96 | 1.15 | 0.046     | 1         | 1          | 62          | tags=6%, list=3%, signal=6%   |
| GTGCCTT_MIR506                                                          | 30   | 0.95 | 1.12 | 0.047     | 1         | 1          | 72          | tags=3%, list=3%, signal=3%   |
| KIM_ALL_DISORDERS_CALB1_CORR_UP                                         | 27   | 0.96 | 1.13 | 0.048     | 1         | 1          | 72          | tags=4%, list=3%, signal=4%   |
| DOANE_RESPONSE_TO_ANDROGEN_DN                                           | 30   | 0.95 | 1.12 | 0.048     | 1         | 1          | 72          | tags=3%, list=3%, signal=3%   |

|                                   |    |      |      |       |   |   |    |                                |
|-----------------------------------|----|------|------|-------|---|---|----|--------------------------------|
| HNFI_C                            | 15 | 0.97 | 1.16 | 0.048 | 1 | 1 | 45 | tags=7%, list=2%,<br>signal=7% |
| MASSARWEH_TAMOXIFEN_RESISTANCE_DN | 24 | 0.96 | 1.13 | 0.049 | 1 | 1 | 72 | tags=4%, list=3%,<br>signal=4% |

Supplementary Table 2B: Downregulated Gene Set Enrichment Analysis for 2478 probes identified by ANOVA with nominal p-value < 0.05.

| GS                                                         | Size | ES                 | NES                | NO<br>M p-<br>val | FDR<br>q-val       | FWE<br>R p-<br>val | Rank<br>at<br>Max | Leading Edge                           |
|------------------------------------------------------------|------|--------------------|--------------------|-------------------|--------------------|--------------------|-------------------|----------------------------------------|
| RHEIN_ALL_GLUCOCORTICOID_THERAPY_UP                        | 10   | -<br>0.847<br>774  | -<br>1.835<br>2331 | 0                 | 0                  | 0                  | 329               | tags=100%,<br>list=16%,<br>signal=118% |
| JOHANSSON_GLIOMAGENESIS_BY_PDGFUP                          | 12   | -<br>0.860<br>5654 | -<br>1.771<br>203  | 0                 | 0                  | 0                  | 304               | tags=100%,<br>list=14%,<br>signal=116% |
| KHETCHOUMIAN_TRIM24_TARGETS_UP                             | 7    | -<br>0.858<br>5086 | -<br>1.756<br>6353 | 0                 | 0.000<br>1782      | 0.001              | 304               | tags=100%,<br>list=14%,<br>signal=117% |
| ODONNELL_TARGETS_OF_MYC_AND_TFRC_DN                        | 12   | -<br>0.684<br>7149 | -<br>1.725<br>8455 | 0                 | 0.000<br>1769<br>2 | 0.001              | 671               | tags=100%,<br>list=32%,<br>signal=146% |
| HINATA_NFKB_TARGETS KERATINOCYTE_DN                        | 9    | -<br>0.712<br>9186 | -<br>1.658<br>9348 | 0                 | 0.000<br>6520<br>8 | 0.004              | 610               | tags=100%,<br>list=29%,<br>signal=140% |
| WP_HEPATITIS_C_AND_HEPATOCELLULAR_CARCINOMA                | 7    | -<br>0.846<br>5583 | -<br>1.651<br>3274 | 0                 | 0.000<br>7770<br>7 | 0.005              | 329               | tags=100%,<br>list=16%,<br>signal=118% |
| LEE_LIVER_CANCER_HEPATOBLAST                               | 6    | -<br>0.837<br>076  | -<br>1.631<br>133  | 0                 | 0.001<br>2925<br>9 | 0.008              | 348               | tags=100%,<br>list=17%,<br>signal=120% |
| BLANCO_MELO_INFLUENZA_A_INFECTION_A594_CELLS_UP            | 6    | -<br>0.837<br>076  | -<br>1.631<br>0229 | 0                 | 0.001<br>2836<br>2 | 0.008              | 348               | tags=100%,<br>list=17%,<br>signal=120% |
| DORN_ADENOVIRUS_INFECTION_24HR_DN                          | 9    | -<br>0.757<br>8948 | -<br>1.624<br>0602 | 0                 | 0.001<br>9545<br>4 | 0.012              | 516               | tags=100%,<br>list=25%,<br>signal=132% |
| XU_GH1_EXOGENOUS_TARGETS_DN                                | 5    | -<br>0.878<br>2235 | -<br>1.616<br>0276 | 0                 | 0.002<br>0932<br>5 | 0.013              | 261               | tags=100%,<br>list=12%,<br>signal=114% |
| KIM_LRRC3B_TARGETS                                         | 5    | -<br>0.832<br>3782 | -<br>1.612<br>6289 | 0                 | 0.002<br>2354<br>7 | 0.014              | 357               | tags=100%,<br>list=17%,<br>signal=120% |
| GAURNIER_PSMD4_TARGETS                                     | 16   | -<br>0.676<br>4283 | -<br>1.592<br>0905 | 0                 | 0.003<br>2544<br>7 | 0.019              | 691               | tags=100%,<br>list=33%,<br>signal=148% |
| PID_ATF2_PATHWAY                                           | 9    | -<br>0.747<br>8469 | -<br>1.590<br>9554 | 0                 | 0.003<br>2326<br>3 | 0.019              | 537               | tags=100%,<br>list=26%,<br>signal=134% |
| REACTOME_SIGNALING_BY_FGFR2                                | 6    | -<br>0.813<br>6646 | -<br>1.589<br>1135 | 0                 | 0.003<br>5315<br>6 | 0.021              | 397               | tags=100%,<br>list=19%,<br>signal=123% |
| REACTOME_CONSTITUTIVE_SIGNALING_BY_ABERRANT_PI3K_IN_CANCER | 6    | -<br>0.823<br>2203 | -<br>1.584<br>975  | 0                 | 0.003<br>8234<br>5 | 0.023              | 377               | tags=100%,<br>list=18%,<br>signal=122% |
| PID_CMYB_PATHWAY                                           | 6    | -<br>0.846<br>1539 | -<br>1.584<br>6355 | 0                 | 0.003<br>7983      | 0.023              | 329               | tags=100%,<br>list=16%,<br>signal=118% |
| BOHN_PRIMARY_IMMUNODEFICIENCY_SYNDROM_UP                   | 7    | -<br>0.811<br>1855 | -<br>1.580<br>6632 | 0                 | 0.004<br>0669      | 0.025              | 403               | tags=100%,<br>list=19%,<br>signal=123% |
| HENDRICKS_SMARCA4_TARGETS_UP                               | 12   | -<br>0.767<br>609  | -<br>1.579<br>8817 | 0                 | 0.004<br>0404<br>9 | 0.025              | 498               | tags=100%,<br>list=24%,<br>signal=130% |
| BURTON_ADIPOGENESIS_2                                      | 10   | -<br>0.662<br>0393 | -<br>1.577<br>8667 | 0                 | 0.004<br>1484<br>5 | 0.026              | 717               | tags=100%,<br>list=34%,<br>signal=151% |
| AMIT_EGF_RESPONSE_60_HELA                                  | 6    | -<br>0.810<br>3201 | -<br>1.575<br>7201 | 0                 | 0.004<br>2550<br>2 | 0.027              | 404               | tags=100%,<br>list=19%,<br>signal=123% |
| NAGASHIMA_NRG1_SIGNALING_DN                                | 7    | -<br>0.799<br>2352 | -<br>1.574<br>8599 | 0                 | 0.004<br>2279<br>2 | 0.027              | 428               | tags=100%,<br>list=20%,<br>signal=125% |

|                                                                    |    |                    |                    |   |                    |       |     |                                        |
|--------------------------------------------------------------------|----|--------------------|--------------------|---|--------------------|-------|-----|----------------------------------------|
| JIANG_HYPOXIA_CANCER                                               | 6  | -<br>0.799<br>8089 | -<br>1.570<br>0128 | 0 | 0.004<br>3285<br>3 | 0.027 | 426 | tags=100%,<br>list=20%,<br>signal=125% |
| NGUYEN_NOTCHI_TARGETS_DN                                           | 6  | -<br>0.787<br>3865 | -<br>1.568<br>5278 | 0 | 0.004<br>4700<br>7 | 0.028 | 452 | tags=100%,<br>list=22%,<br>signal=127% |
| WP_PRIMARY_FOCAL_SEGMENTAL_GLOMERULOSCLEROSIS_FSGS                 | 11 | -<br>0.608<br>2375 | -<br>1.565<br>9679 | 0 | 0.004<br>7061<br>4 | 0.03  | 830 | tags=100%,<br>list=40%,<br>signal=165% |
| REACTOME_CYCLIN_A_B1_B2_ASSOCIATED_EVENTS_DURING_G2_M_TRANSITION   | 6  | -<br>0.812<br>709  | -<br>1.560<br>894  | 0 | 0.005<br>0264<br>9 | 0.033 | 399 | tags=100%,<br>list=19%,<br>signal=123% |
| DORN_ADENOVIRUS_INFECTION_48HR_DN                                  | 7  | -<br>0.765<br>7744 | -<br>1.555<br>3398 | 0 | 0.005<br>2619<br>4 | 0.035 | 498 | tags=100%,<br>list=24%,<br>signal=131% |
| MEBARKI_HCC_PROGENITOR_WNT_UP_CTNNB1_DEPENDENT_BLOCKED_BY_FZD8CRD  | 5  | -<br>0.827<br>1251 | -<br>1.542<br>2379 | 0 | 0.008<br>3355<br>9 | 0.054 | 368 | tags=100%,<br>list=18%,<br>signal=121% |
| CAFFAREL_RESPONSE_TO_THC_24HR_5_DN                                 | 6  | -<br>0.810<br>7979 | -<br>1.540<br>6023 | 0 | 0.008<br>6922<br>2 | 0.058 | 403 | tags=100%,<br>list=19%,<br>signal=123% |
| MARZEC_IL2_SIGNALING_UP                                            | 11 | -<br>0.657<br>0881 | -<br>1.531<br>25   | 0 | 0.009<br>3141<br>6 | 0.062 | 728 | tags=100%,<br>list=35%,<br>signal=152% |
| DORN_ADENOVIRUS_INFECTION_12HR_DN                                  | 7  | -<br>0.765<br>7744 | -<br>1.530<br>4037 | 0 | 0.009<br>3752<br>4 | 0.063 | 498 | tags=100%,<br>list=24%,<br>signal=131% |
| HERNANDEZ_MITOTIC_ARREST_BY_DOCETAXEL_1_DN                         | 8  | -<br>0.736<br>968  | -<br>1.528<br>5532 | 0 | 0.009<br>5708<br>7 | 0.065 | 559 | tags=100%,<br>list=27%,<br>signal=136% |
| ONDER_CDHI_TARGETS_3_DN                                            | 13 | -<br>0.706<br>1362 | -<br>1.528<br>0083 | 0 | 0.009<br>5142<br>4 | 0.065 | 627 | tags=100%,<br>list=30%,<br>signal=142% |
| REACTOME_SIGNALING_BY_FGFR                                         | 6  | -<br>0.813<br>6646 | -<br>1.520<br>943  | 0 | 0.010<br>5348<br>8 | 0.073 | 397 | tags=100%,<br>list=19%,<br>signal=123% |
| SATO_SILENCED_BY_DEACETYLATION_IN_PANCREATIC_CANCER                | 6  | -<br>0.797<br>8978 | -<br>1.510<br>0919 | 0 | 0.012<br>1973<br>4 | 0.084 | 430 | tags=100%,<br>list=20%,<br>signal=125% |
| BERENJENO_ROCK_SIGNALING_NOT_VIA_RHOA_DN                           | 5  | -<br>0.849<br>0927 | -<br>1.508<br>2368 | 0 | 0.012<br>5727<br>9 | 0.086 | 322 | tags=100%,<br>list=15%,<br>signal=118% |
| VERHAAK_GLIOMASTOMA_CLASSICAL                                      | 5  | -<br>0.823<br>3047 | -<br>1.506<br>8544 | 0 | 0.012<br>7568<br>4 | 0.088 | 376 | tags=100%,<br>list=18%,<br>signal=122% |
| SMID_BREAST_CANCER_RELAPSE_IN_PLEURA_DN                            | 5  | -<br>0.832<br>3782 | -<br>1.506<br>5376 | 0 | 0.012<br>6835<br>2 | 0.088 | 357 | tags=100%,<br>list=17%,<br>signal=120% |
| REACTOME_THE_ROLE_OF_GTSE1_IN_G2_M_PROGRESSION_AFTER_G2_CHECKPOINT | 6  | -<br>0.784<br>5199 | -<br>1.502<br>6147 | 0 | 0.012<br>9688<br>3 | 0.091 | 458 | tags=100%,<br>list=22%,<br>signal=128% |
| FERRARI_RESPONSE_TO_FENRETINIDE_UP                                 | 8  | -<br>0.704<br>4476 | -<br>1.502<br>448  | 0 | 0.012<br>8951<br>4 | 0.091 | 627 | tags=100%,<br>list=30%,<br>signal=142% |
| KRIGE_AMINO_ACID_DEPRIVATION                                       | 6  | -<br>0.743<br>4305 | -<br>1.498<br>3149 | 0 | 0.013<br>8535<br>9 | 0.099 | 544 | tags=100%,<br>list=26%,<br>signal=135% |
| GERHOLD_ADIPOGENESIS_DN                                            | 11 | -<br>0.660<br>4406 | -<br>1.496<br>2026 | 0 | 0.014<br>0578<br>2 | 0.101 | 721 | tags=100%,<br>list=34%,<br>signal=152% |
| CHANG_IMMORTALIZED_BY_HPV31_UP                                     | 7  | -<br>0.753<br>8241 | -<br>1.491<br>5903 | 0 | 0.014<br>5121<br>8 | 0.105 | 523 | tags=100%,<br>list=25%,<br>signal=133% |
| SHEPARD_CRASH_AND_BURN_MUTANT_UP                                   | 8  | -<br>0.739<br>3591 | -<br>1.491<br>5581 | 0 | 0.014<br>4315<br>6 | 0.105 | 554 | tags=100%,<br>list=26%,<br>signal=135% |
| ABBUD_LIF_SIGNALING_1_UP                                           | 6  | -<br>0.790<br>731  | -<br>1.490<br>9121 | 0 | 0.014<br>6369<br>3 | 0.106 | 445 | tags=100%,<br>list=21%,<br>signal=127% |
| PROVENZANI_METASTASIS_DN                                           | 11 | -<br>0.668<br>1035 | -<br>1.490<br>0663 | 0 | 0.014<br>6785<br>2 | 0.107 | 705 | tags=100%,<br>list=34%,<br>signal=150% |
| OLSSON_E2F3_TARGETS_DN                                             | 7  | -<br>0.725<br>6214 | -<br>1.482<br>5023 | 0 | 0.015<br>8885<br>3 | 0.117 | 582 | tags=100%,<br>list=28%,<br>signal=138% |
| REACTOME_UNFOLDED_PROTEIN_RESPONSE_UPR                             | 5  | -<br>0.797<br>5167 | -<br>1.482<br>1783 | 0 | 0.015<br>8021<br>8 | 0.117 | 430 | tags=100%,<br>list=20%,<br>signal=125% |

|                                                          |    |                    |                    |   |                    |       |     |                                        |
|----------------------------------------------------------|----|--------------------|--------------------|---|--------------------|-------|-----|----------------------------------------|
| MORI_LARGE_PRE_BII_LYMPHOCYTE_DN                         | 5  | -<br>0.845<br>7497 | -<br>1.479<br>8034 | 0 | 0.016<br>5608<br>8 | 0.124 | 329 | tags=100%,<br>list=16%,<br>signal=118% |
| BROWNE_HCMV_INFECTION_6HR_UP                             | 8  | -<br>0.688<br>1875 | -<br>1.476<br>7629 | 0 | 0.016<br>9019<br>7 | 0.127 | 661 | tags=100%,<br>list=31%,<br>signal=145% |
| REACTOME_AMINO_ACID_TRANSPORT_ACROSS_THE_PLASMA_MEMBRANE | 7  | -<br>0.752<br>39   | -<br>1.474<br>3195 | 0 | 0.017<br>0792<br>2 | 0.129 | 526 | tags=100%,<br>list=25%,<br>signal=133% |
| SCHOEN_NFKB_SIGNALING                                    | 8  | -<br>0.704<br>4476 | -<br>1.473<br>4421 | 0 | 0.017<br>1152<br>5 | 0.13  | 627 | tags=100%,<br>list=30%,<br>signal=142% |
| BROWNE_HCMV_INFECTION_4HR_UP                             | 10 | -<br>0.680<br>7085 | -<br>1.472<br>5579 | 0 | 0.017<br>3403<br>2 | 0.132 | 678 | tags=100%,<br>list=32%,<br>signal=147% |
| GRAHAM_CML_QUIESCENT_VS_CML_DIVIDING_UP                  | 7  | -<br>0.704<br>1109 | -<br>1.472<br>3938 | 0 | 0.017<br>2490<br>6 | 0.132 | 627 | tags=100%,<br>list=30%,<br>signal=142% |
| KEGG_HEMATOPOIETIC_CELL_LINEAGE                          | 12 | -<br>0.675<br>1317 | -<br>1.471<br>6942 | 0 | 0.017<br>4216<br>1 | 0.134 | 691 | tags=100%,<br>list=33%,<br>signal=148% |
| REACTOME_CHEMOKINE_RECEPTORS_BIND_CHEMOKINES             | 9  | -<br>0.702<br>3923 | -<br>1.469<br>8899 | 0 | 0.017<br>6631<br>6 | 0.136 | 632 | tags=100%,<br>list=30%,<br>signal=142% |
| REACTOME_SENESCENCE_ASSOCIATED_SECRETORY_PHENOTYPE_SASP  | 5  | -<br>0.810<br>4107 | -<br>1.465<br>964  | 0 | 0.018<br>0166<br>7 | 0.14  | 403 | tags=100%,<br>list=19%,<br>signal=123% |
| PID_FGF_PATHWAY                                          | 5  | -<br>0.796<br>0841 | -<br>1.465<br>0205 | 0 | 0.018<br>1658<br>5 | 0.142 | 433 | tags=100%,<br>list=21%,<br>signal=126% |
| KOKKINAKIS_METHIONINE_DEPRIVATION_96HR_DN                | 9  | -<br>0.686<br>6029 | -<br>1.460<br>147  | 0 | 0.018<br>8445<br>7 | 0.147 | 665 | tags=100%,<br>list=32%,<br>signal=146% |
| FARMER_BREAST_CANCER_CLUSTER_3                           | 5  | -<br>0.770<br>7737 | -<br>1.460<br>0102 | 0 | 0.018<br>8977<br>8 | 0.147 | 486 | tags=100%,<br>list=23%,<br>signal=130% |
| PID_FOXM1_PATHWAY                                        | 10 | -<br>0.656<br>7736 | -<br>1.454<br>9311 | 0 | 0.019<br>9055<br>8 | 0.157 | 728 | tags=100%,<br>list=35%,<br>signal=152% |
| REACTOME_SIGNALING_BY_INSULIN_RECEPTOR                   | 6  | -<br>0.743<br>4305 | -<br>1.454<br>837  | 0 | 0.019<br>8055<br>5 | 0.157 | 544 | tags=100%,<br>list=26%,<br>signal=135% |
| PID_SYNDECAN_2_PATHWAY                                   | 6  | -<br>0.760<br>6307 | -<br>1.447<br>9946 | 0 | 0.021<br>7408<br>8 | 0.174 | 508 | tags=100%,<br>list=24%,<br>signal=132% |
| ZHONG_SECRETOME_OF_LUNG_CANCER_AND_MACROPHAGE            | 9  | -<br>0.667<br>4641 | -<br>1.447<br>3097 | 0 | 0.021<br>8182<br>2 | 0.175 | 705 | tags=100%,<br>list=34%,<br>signal=150% |
| KEGG_OOCYTE_MEIOSIS                                      | 9  | -<br>0.656<br>4593 | -<br>1.440<br>8737 | 0 | 0.023<br>4571<br>9 | 0.188 | 728 | tags=100%,<br>list=35%,<br>signal=152% |
| WP_OXIDATIVE_STRESS_RESPONSE                             | 5  | -<br>0.763<br>6103 | -<br>1.440<br>1433 | 0 | 0.023<br>3416<br>3 | 0.188 | 501 | tags=100%,<br>list=24%,<br>signal=131% |
| KEGG_INTESTINAL_IMMUNE_NETWORK_FOR_IGA_PRODUCTION        | 9  | -<br>0.674<br>1627 | -<br>1.438<br>7338 | 0 | 0.023<br>5618<br>9 | 0.191 | 691 | tags=100%,<br>list=33%,<br>signal=148% |
| KOBAYASHI_EGFR_SIGNALING_6HR_DN                          | 8  | -<br>0.661<br>406  | -<br>1.438<br>4456 | 0 | 0.023<br>5482<br>9 | 0.192 | 717 | tags=100%,<br>list=34%,<br>signal=151% |
| PID_P73PATHWAY                                           | 10 | -<br>0.629<br>4878 | -<br>1.438<br>2064 | 0 | 0.023<br>5642<br>4 | 0.193 | 785 | tags=100%,<br>list=37%,<br>signal=159% |
| GAUSSMANN_MLL_AF4_FUSION_TARGETS_A_DN                    | 8  | -<br>0.668<br>1014 | -<br>1.433<br>997  | 0 | 0.024<br>2391      | 0.197 | 703 | tags=100%,<br>list=33%,<br>signal=150% |
| RICKMAN_HEAD_AND_NECK_CANCER_B                           | 5  | -<br>0.771<br>2512 | -<br>1.424<br>5642 | 0 | 0.026<br>7481<br>1 | 0.218 | 485 | tags=100%,<br>list=23%,<br>signal=130% |
| HERNANDEZ_MITOTIC_ARREST_BY_DOCETAXEL_1_UP               | 5  | -<br>0.771<br>2512 | -<br>1.419<br>4202 | 0 | 0.029<br>2766<br>3 | 0.236 | 485 | tags=100%,<br>list=23%,<br>signal=130% |
| GROSS_HYPOXIA_VIA_ELK3_ONLY_UP                           | 6  | -<br>0.747<br>7306 | -<br>1.416<br>8471 | 0 | 0.030<br>0966<br>3 | 0.244 | 535 | tags=100%,<br>list=25%,<br>signal=134% |
| WP_CELL_CYCLE                                            | 13 | -<br>0.657<br>7181 | -<br>1.415<br>1624 | 0 | 0.030<br>3748<br>4 | 0.248 | 728 | tags=100%,<br>list=35%,<br>signal=152% |



|                                                  |    |                    |                    |   |                    |       |     |                                        |
|--------------------------------------------------|----|--------------------|--------------------|---|--------------------|-------|-----|----------------------------------------|
| WP_HIPPOMERLIN_SIGNALING_DYSREGULATION           | 9  | -<br>0.668<br>421  | -<br>1.414<br>9224 | 0 | 0.030<br>3488<br>8 | 0.248 | 703 | tags=100%,<br>list=33%,<br>signal=150% |
| REACTOME_LICAM_INTERACTIONS                      | 11 | -<br>0.594<br>3487 | -<br>1.411<br>2965 | 0 | 0.031<br>8844<br>8 | 0.259 | 859 | tags=100%,<br>list=41%,<br>signal=168% |
| PID_AVB3_INTEGRIN_PATHWAY                        | 7  | -<br>0.712<br>7151 | -<br>1.409<br>6726 | 0 | 0.032<br>4394<br>3 | 0.264 | 609 | tags=100%,<br>list=29%,<br>signal=140% |
| LY_AGING_MIDDLE_DN                               | 9  | -<br>0.669<br>378  | -<br>1.409<br>3351 | 0 | 0.032<br>7842<br>6 | 0.267 | 701 | tags=100%,<br>list=33%,<br>signal=149% |
| WP_ALLOGRAFT_REJECTION                           | 11 | -<br>0.629<br>7892 | -<br>1.408<br>677  | 0 | 0.032<br>9917<br>7 | 0.268 | 785 | tags=100%,<br>list=37%,<br>signal=159% |
| KEGG_GRAFT_VERSUS_HOST_DISEASE                   | 9  | -<br>0.629<br>1866 | -<br>1.407<br>7076 | 0 | 0.033<br>3535<br>8 | 0.271 | 785 | tags=100%,<br>list=37%,<br>signal=159% |
| LY_AGING_OLD_DN                                  | 12 | -<br>0.604<br>2166 | -<br>1.407<br>366  | 0 | 0.033<br>4642<br>8 | 0.274 | 839 | tags=100%,<br>list=40%,<br>signal=166% |
| KANG_IMMORTALIZED_BY_TERT_UP                     | 11 | -<br>0.631<br>2261 | -<br>1.404<br>3688 | 0 | 0.034<br>2347<br>4 | 0.281 | 782 | tags=100%,<br>list=37%,<br>signal=159% |
| LEE_LIVER_CANCER_DENA_UP                         | 11 | -<br>0.660<br>4406 | -<br>1.404<br>277  | 0 | 0.034<br>0819<br>1 | 0.281 | 721 | tags=100%,<br>list=34%,<br>signal=152% |
| MIKKELSEN_IPS_ICP_WITH_H3K4ME3_AND_H327ME3       | 9  | -<br>0.623<br>445  | -<br>1.401<br>5776 | 0 | 0.034<br>9645<br>5 | 0.285 | 797 | tags=100%,<br>list=38%,<br>signal=161% |
| REACTOME_NON_INTEGRIN_MEMBRANE_ECM_INTERACTIONS  | 8  | -<br>0.691<br>5352 | -<br>1.401<br>0395 | 0 | 0.034<br>9116      | 0.285 | 654 | tags=100%,<br>list=31%,<br>signal=145% |
| YAN_ESCAPE_FROM_ANOIKIS                          | 7  | -<br>0.701<br>7208 | -<br>1.398<br>0953 | 0 | 0.036<br>4249<br>4 | 0.297 | 632 | tags=100%,<br>list=30%,<br>signal=143% |
| KUNINGER_IGF1_VS_PDGF_TARGETS_DN                 | 9  | -<br>0.642<br>1053 | -<br>1.397<br>6741 | 0 | 0.036<br>2651<br>8 | 0.297 | 758 | tags=100%,<br>list=36%,<br>signal=156% |
| HUPER_BREAST_BASAL_VS_LUMINAL_DN                 | 9  | -<br>0.675<br>1196 | -<br>1.396<br>4152 | 0 | 0.036<br>8994      | 0.303 | 689 | tags=100%,<br>list=33%,<br>signal=148% |
| NABA_BASEMENT_MEMBRANES                          | 7  | -<br>0.685<br>4684 | -<br>1.394<br>6561 | 0 | 0.037<br>4246<br>6 | 0.307 | 666 | tags=100%,<br>list=32%,<br>signal=146% |
| SESTO_RESPONSE_TO_UV_C3                          | 5  | -<br>0.738<br>2999 | -<br>1.394<br>1249 | 0 | 0.037<br>2626<br>5 | 0.307 | 554 | tags=100%,<br>list=26%,<br>signal=136% |
| YAO_TEMPORAL_RESPONSE_TO_PROGESTERONE_CLUSTER_15 | 7  | -<br>0.712<br>7151 | -<br>1.391<br>9402 | 0 | 0.038<br>0305<br>4 | 0.315 | 609 | tags=100%,<br>list=29%,<br>signal=140% |
| WP_FOLATE_METABOLISM                             | 10 | -<br>0.660<br>1245 | -<br>1.389<br>8875 | 0 | 0.039<br>0661<br>3 | 0.325 | 721 | tags=100%,<br>list=34%,<br>signal=152% |
| GROSS_HYPOXIA_VIA_ELK3_AND_HIF1A_DN              | 10 | -<br>0.615<br>6055 | -<br>1.389<br>4119 | 0 | 0.039<br>4264<br>9 | 0.33  | 814 | tags=100%,<br>list=39%,<br>signal=163% |
| WP_COMPLEMENT_AND_COAGULATION_CASCADES           | 7  | -<br>0.659<br>1778 | -<br>1.387<br>4403 | 0 | 0.040<br>2187<br>9 | 0.337 | 721 | tags=100%,<br>list=34%,<br>signal=152% |
| TIAN_TNF_SIGNALING_VIA_NFKB                      | 11 | -<br>0.617<br>8161 | -<br>1.384<br>1202 | 0 | 0.041<br>5440<br>7 | 0.348 | 810 | tags=100%,<br>list=39%,<br>signal=162% |
| WP_MEASLES_VIRUS_INFECTION                       | 11 | -<br>0.617<br>8161 | -<br>1.382<br>6367 | 0 | 0.041<br>7432<br>8 | 0.352 | 810 | tags=100%,<br>list=39%,<br>signal=162% |
| REACTOME_CELLULAR_SENESCENCE                     | 8  | -<br>0.634<br>6246 | -<br>1.378<br>536  | 0 | 0.043<br>6577<br>7 | 0.361 | 773 | tags=100%,<br>list=37%,<br>signal=158% |
| COATES_MACROPHAGE_M1_VS_M2_UP                    | 9  | -<br>0.647<br>3684 | -<br>1.377<br>8005 | 0 | 0.043<br>8000<br>5 | 0.364 | 747 | tags=100%,<br>list=36%,<br>signal=155% |
| WP_CYTOKINES_AND_INFLAMMATORY_RESPONSE           | 7  | -<br>0.693<br>1166 | -<br>1.373<br>7907 | 0 | 0.045<br>3476<br>8 | 0.374 | 650 | tags=100%,<br>list=31%,<br>signal=144% |
| KEGG_SYSTEMIC_LUPUS_ERYTHEMATOSUS                | 8  | -<br>0.673<br>8403 | -<br>1.373<br>2944 | 0 | 0.045<br>7213<br>3 | 0.376 | 691 | tags=100%,<br>list=33%,<br>signal=149% |

|                                                                      |    |                    |                    |   |                    |       |     |                                        |
|----------------------------------------------------------------------|----|--------------------|--------------------|---|--------------------|-------|-----|----------------------------------------|
| WP_SPINAL_CORD_INJURY                                                | 9  | -<br>0.662<br>6794 | -<br>1.371<br>8693 | 0 | 0.046<br>0526<br>5 | 0.381 | 715 | tags=100%,<br>list=34%,<br>signal=151% |
| WP_PHOTODYNAMIC_THERAPYINDUCED_NFKB_SURVIVAL_SIGNALING               | 7  | -<br>0.693<br>1166 | -<br>1.368<br>4409 | 0 | 0.047<br>5184<br>4 | 0.389 | 650 | tags=100%,<br>list=31%,<br>signal=144% |
| ZHENG_IL22_SIGNALING_UP                                              | 7  | -<br>0.659<br>1778 | -<br>1.366<br>6997 | 0 | 0.047<br>8517<br>2 | 0.392 | 721 | tags=100%,<br>list=34%,<br>signal=152% |
| HOWLIN_PUBERTAL_MAMMARY_GLAND                                        | 7  | -<br>0.693<br>1166 | -<br>1.365<br>8628 | 0 | 0.048<br>1321<br>5 | 0.394 | 650 | tags=100%,<br>list=31%,<br>signal=144% |
| REACTOME_G0_AND_EARLY_G1                                             | 7  | -<br>0.655<br>8318 | -<br>1.365<br>3831 | 0 | 0.048<br>2598      | 0.396 | 728 | tags=100%,<br>list=35%,<br>signal=153% |
| DAZARD_UV_RESPONSE_CLUSTER_G28                                       | 7  | -<br>0.704<br>1109 | -<br>1.362<br>9875 | 0 | 0.049<br>4415<br>7 | 0.408 | 627 | tags=100%,<br>list=30%,<br>signal=142% |
| VANTVEER_BREAST_CANCER_POOR_PROGNOSIS                                | 11 | -<br>0.591<br>4751 | -<br>1.361<br>6318 | 0 | 0.049<br>7666<br>2 | 0.412 | 865 | tags=100%,<br>list=41%,<br>signal=169% |
| WP_PROSTAGLANDIN_SYNTHESIS_AND_REGULATION                            | 9  | -<br>0.624<br>4019 | -<br>1.359<br>1727 | 0 | 0.050<br>6221<br>3 | 0.422 | 795 | tags=100%,<br>list=38%,<br>signal=160% |
| DAZARD_UV_RESPONSE_CLUSTER_G1                                        | 5  | -<br>0.743<br>553  | -<br>1.357<br>3698 | 0 | 0.051<br>4085<br>2 | 0.428 | 543 | tags=100%,<br>list=26%,<br>signal=135% |
| REACTOME_APC_C_MEDIATED_DEGRADATION_OF_CELL_CYCLE_PROTEINS           | 8  | -<br>0.706<br>3606 | -<br>1.353<br>7152 | 0 | 0.054<br>0239<br>7 | 0.445 | 623 | tags=100%,<br>list=30%,<br>signal=142% |
| WP_VITAMIN_B12_METABOLISM                                            | 9  | -<br>0.659<br>8086 | -<br>1.350<br>4477 | 0 | 0.055<br>5844<br>9 | 0.456 | 721 | tags=100%,<br>list=34%,<br>signal=152% |
| DER_IFN_ALPHA_RESPONSE_UP                                            | 11 | -<br>0.569<br>4444 | -<br>1.349<br>6027 | 0 | 0.056<br>1886<br>4 | 0.46  | 911 | tags=100%,<br>list=43%,<br>signal=176% |
| WP_MIRNAS_INVOLVEMENT_IN_THE_IMMUNE_RESPONSE_IN_SEPSIS               | 6  | -<br>0.692<br>7855 | -<br>1.346<br>5049 | 0 | 0.057<br>8229<br>8 | 0.472 | 650 | tags=100%,<br>list=31%,<br>signal=144% |
| PETROVA_PROX1_TARGETS_UP                                             | 8  | -<br>0.681<br>0139 | -<br>1.345<br>7768 | 0 | 0.057<br>8707<br>5 | 0.473 | 676 | tags=100%,<br>list=32%,<br>signal=147% |
| GLASS_IGF2BP1_CLIP_TARGETS_KNOCKDOWN_DN                              | 12 | -<br>0.569<br>2381 | -<br>1.344<br>2715 | 0 | 0.058<br>1439<br>2 | 0.477 | 912 | tags=100%,<br>list=43%,<br>signal=176% |
| WP_SARSCOV2_INNATE_IMMUNITY_EVASION_AND_CELLSPECIFIC_IMMUNE_RESPONSE | 9  | -<br>0.693<br>7799 | -<br>1.339<br>9339 | 0 | 0.060<br>0234<br>2 | 0.493 | 650 | tags=100%,<br>list=31%,<br>signal=144% |
| KOKKINAKIS_METHIONINE_DEPRIVATION_48HR_DN                            | 5  | -<br>0.724<br>4508 | -<br>1.335<br>2674 | 0 | 0.062<br>6814<br>7 | 0.514 | 583 | tags=100%,<br>list=28%,<br>signal=138% |
| KEGG_TYPE_I_DIABETES_MELLITUS                                        | 8  | -<br>0.628<br>8857 | -<br>1.331<br>5108 | 0 | 0.065<br>3409<br>7 | 0.531 | 785 | tags=100%,<br>list=37%,<br>signal=159% |
| HONRADO_BREAST_CANCER_BRCA1_VS_BRCA2                                 | 6  | -<br>0.655<br>5184 | -<br>1.330<br>4372 | 0 | 0.065<br>7309<br>9 | 0.534 | 728 | tags=100%,<br>list=35%,<br>signal=153% |
| GAJATE_RESPONSE_TO TRABECTEDIN_UP                                    | 12 | -<br>0.618<br>1121 | -<br>1.327<br>1604 | 0 | 0.067<br>5523<br>7 | 0.549 | 810 | tags=100%,<br>list=39%,<br>signal=162% |
| CROMER_METASTASIS_DN                                                 | 8  | -<br>0.638<br>9288 | -<br>1.324<br>8711 | 0 | 0.069<br>0503<br>3 | 0.56  | 764 | tags=100%,<br>list=36%,<br>signal=157% |
| WP_PROSTAGLANDIN_SIGNALING                                           | 7  | -<br>0.693<br>1166 | -<br>1.324<br>6197 | 0 | 0.068<br>8973<br>8 | 0.56  | 650 | tags=100%,<br>list=31%,<br>signal=144% |
| MARTIN_NFKB_TARGETS_UP                                               | 6  | -<br>0.695<br>6522 | -<br>1.315<br>4362 | 0 | 0.073<br>5020<br>6 | 0.59  | 644 | tags=100%,<br>list=31%,<br>signal=144% |
| NATSUME_RESPONSE_TO_INTERFERON_BETA_UP                               | 9  | -<br>0.629<br>1866 | -<br>1.313<br>09   | 0 | 0.075<br>3203<br>4 | 0.599 | 785 | tags=100%,<br>list=37%,<br>signal=159% |
| ZHANG_PROLIFERATING_VS_QUIESCENT                                     | 6  | -<br>0.703<br>7745 | -<br>1.307<br>4113 | 0 | 0.078<br>0762      | 0.615 | 627 | tags=100%,<br>list=30%,<br>signal=142% |
| REACTOME_SIGNALING_BY_MET                                            | 7  | -<br>0.641<br>9694 | -<br>1.306<br>8113 | 0 | 0.078<br>0917<br>7 | 0.617 | 757 | tags=100%,<br>list=36%,<br>signal=156% |

|                                                               |    |                    |                    |   |                    |       |      |                                        |
|---------------------------------------------------------------|----|--------------------|--------------------|---|--------------------|-------|------|----------------------------------------|
| WESTON_VEGFA_TARGETS_3HR                                      | 10 | -<br>0.630<br>9239 | -<br>1.305<br>4675 | 0 | 0.078<br>3155<br>7 | 0.62  | 782  | tags=100%,<br>list=37%,<br>signal=159% |
| CROMER_TUMORIGENESIS_UP                                       | 9  | -<br>0.617<br>2249 | -<br>1.305<br>4478 | 0 | 0.078<br>0464<br>5 | 0.62  | 810  | tags=100%,<br>list=39%,<br>signal=162% |
| WP_ACUTE_VIRAL_MYOCARDITIS                                    | 6  | -<br>0.692<br>7855 | -<br>1.304<br>2728 | 0 | 0.078<br>1012<br>1 | 0.622 | 650  | tags=100%,<br>list=31%,<br>signal=144% |
| HOEBEKE_LYMPHOID_STEM_CELL_UP                                 | 8  | -<br>0.616<br>9297 | -<br>1.302<br>5918 | 0 | 0.078<br>0369      | 0.626 | 810  | tags=100%,<br>list=39%,<br>signal=162% |
| BROWN_MYELOID_CELL_DEVELOPMENT_DN                             | 9  | -<br>0.658<br>8517 | -<br>1.301<br>2664 | 0 | 0.078<br>8691      | 0.634 | 723  | tags=100%,<br>list=34%,<br>signal=152% |
| IZADPANAH_STEM_CELL_ADIPOSE_VS_BONE_DN                        | 11 | -<br>0.521<br>5517 | -<br>1.301<br>0753 | 0 | 0.078<br>5118<br>6 | 0.635 | 1011 | tags=100%,<br>list=48%,<br>signal=192% |
| HUANG_FOXA2_TARGETS_DN                                        | 9  | -<br>0.659<br>8086 | -<br>1.300<br>9434 | 0 | 0.078<br>3280<br>4 | 0.635 | 721  | tags=100%,<br>list=34%,<br>signal=152% |
| BOSCO_EPITHELIAL_DIFFERENTIATION_MODULE                       | 11 | -<br>0.582<br>3755 | -<br>1.296<br>8361 | 0 | 0.080<br>5127      | 0.649 | 884  | tags=100%,<br>list=42%,<br>signal=172% |
| WANG_BARRETTS_ESOPHAGUS_AND_ESOPHAGUS_CANCER_D<br>N           | 5  | -<br>0.695<br>7975 | -<br>1.294<br>8436 | 0 | 0.081<br>1914<br>3 | 0.654 | 643  | tags=100%,<br>list=31%,<br>signal=144% |
| PUIFFE_INVASION_INHIBITED_BY_ASCITES_UP                       | 17 | -<br>0.504<br>3228 | -<br>1.294<br>698  | 0 | 0.080<br>9975<br>2 | 0.655 | 1050 | tags=100%,<br>list=50%,<br>signal=198% |
| BROWNE_INTERFERON_RESPONSIVE_GENES                            | 11 | -<br>0.567<br>5287 | -<br>1.288<br>744  | 0 | 0.084<br>3351<br>8 | 0.677 | 915  | tags=100%,<br>list=44%,<br>signal=176% |
| REACTOME_TP53_REGULATES_TRANSCRIPTION_OF_CELL_CY<br>CLE_GENES | 8  | -<br>0.656<br>1454 | -<br>1.287<br>1752 | 0 | 0.084<br>9525<br>9 | 0.682 | 728  | tags=100%,<br>list=35%,<br>signal=153% |
| WP_PHOTODYNAMIC_THERAPYINDUCED_API_SURVIVAL_SIG<br>NALING     | 8  | -<br>0.628<br>8857 | -<br>1.285<br>2556 | 0 | 0.086<br>3722<br>2 | 0.688 | 785  | tags=100%,<br>list=37%,<br>signal=159% |
| LINDVALL_IMMORTALIZED_BY_TERT_DN                              | 11 | -<br>0.532<br>567  | -<br>1.284<br>0647 | 0 | 0.086<br>7493<br>1 | 0.688 | 988  | tags=100%,<br>list=47%,<br>signal=188% |
| REACTOME_INTERFERON_ALPHA_BETA_SIGNALING                      | 10 | -<br>0.546<br>6731 | -<br>1.283<br>5066 | 0 | 0.086<br>7003<br>5 | 0.688 | 958  | tags=100%,<br>list=46%,<br>signal=183% |
| BUFFA_HYPOXIA_METAGENE                                        | 8  | -<br>0.633<br>1899 | -<br>1.282<br>3244 | 0 | 0.086<br>5399<br>3 | 0.693 | 776  | tags=100%,<br>list=37%,<br>signal=158% |
| SWEET_KRAS_TARGETS_DN                                         | 10 | -<br>0.600<br>7659 | -<br>1.279<br>7418 | 0 | 0.088<br>7723<br>3 | 0.706 | 845  | tags=100%,<br>list=40%,<br>signal=167% |
| TSAI_RESPONSE_TO_RADIATION_THERAPY                            | 7  | -<br>0.659<br>1778 | -<br>1.279<br>2209 | 0 | 0.088<br>7223<br>3 | 0.706 | 721  | tags=100%,<br>list=34%,<br>signal=152% |
| PROVENZANI_METASTASIS_UP                                      | 9  | -<br>0.624<br>4019 | -<br>1.276<br>908  | 0 | 0.090<br>5142<br>4 | 0.712 | 795  | tags=100%,<br>list=38%,<br>signal=160% |
| PID_TAP63_PATHWAY                                             | 9  | -<br>0.629<br>1866 | -<br>1.274<br>688  | 0 | 0.091<br>9105      | 0.719 | 785  | tags=100%,<br>list=37%,<br>signal=159% |
| LEE_AGING_CEREBELLUM_DN                                       | 8  | -<br>0.610<br>7126 | -<br>1.273<br>4344 | 0 | 0.092<br>3389<br>8 | 0.724 | 823  | tags=100%,<br>list=39%,<br>signal=164% |
| REACTOME_MET_PROMOTES_CELL_MOTILITY                           | 7  | -<br>0.641<br>9694 | -<br>1.273<br>0906 | 0 | 0.092<br>3086      | 0.725 | 757  | tags=100%,<br>list=36%,<br>signal=156% |
| WIEDERSCHAIN_TARGETS_OF_BMI1_AND_PCGF2                        | 15 | -<br>0.526<br>8714 | -<br>1.270<br>8334 | 0 | 0.094<br>6034<br>4 | 0.732 | 1002 | tags=100%,<br>list=48%,<br>signal=190% |
| MIKKELSEN_ES_ICP_WITH_H3K4ME3_AND_H3K27ME3                    | 11 | -<br>0.675<br>7663 | -<br>1.270<br>2557 | 0 | 0.094<br>8770<br>9 | 0.736 | 689  | tags=100%,<br>list=33%,<br>signal=148% |
| KEGG_ALLOGRAFT_REJECTION                                      | 8  | -<br>0.628<br>8857 | -<br>1.267<br>5776 | 0 | 0.096<br>6451<br>3 | 0.746 | 785  | tags=100%,<br>list=37%,<br>signal=159% |
| MORI_MATURE_B_LYMPHOCYTE_DN                                   | 8  | -<br>0.597<br>3219 | -<br>1.265<br>6112 | 0 | 0.098<br>2641<br>9 | 0.759 | 851  | tags=100%,<br>list=41%,<br>signal=168% |

|                                                             |    |                    |                    |   |                    |       |      |                                        |
|-------------------------------------------------------------|----|--------------------|--------------------|---|--------------------|-------|------|----------------------------------------|
| RADMACHER_AML_PROGNOSIS                                     | 9  | -<br>0.585<br>6459 | -<br>1.265<br>0229 | 0 | 0.098<br>3394<br>4 | 0.759 | 876  | tags=100%,<br>list=42%,<br>signal=171% |
| REACTOME_SIGNALING_BY_PTK6                                  | 6  | -<br>0.655<br>5184 | -<br>1.264<br>043  | 0 | 0.098<br>5469<br>5 | 0.763 | 728  | tags=100%,<br>list=35%,<br>signal=153% |
| KEGG_NOD_LIKE_RECEPTOR_SIGNALING_PATHWAY                    | 9  | -<br>0.617<br>2249 | -<br>1.263<br>9314 | 0 | 0.098<br>3208<br>6 | 0.763 | 810  | tags=100%,<br>list=39%,<br>signal=162% |
| REICHERT_MITOSIS_LIN9_TARGETS                               | 12 | -<br>0.505<br>9894 | -<br>1.263<br>9136 | 0 | 0.098<br>0358<br>7 | 0.763 | 1044 | tags=100%,<br>list=50%,<br>signal=198% |
| GRAHAM_NORMAL_QUIESCENT_VS_NORMAL_DIVIDING_UP               | 11 | -<br>0.618<br>7739 | -<br>1.263<br>3638 | 0 | 0.098<br>1992<br>6 | 0.763 | 808  | tags=100%,<br>list=38%,<br>signal=162% |
| SMID_BREAST_CANCER_LUMINAL_A_DN                             | 9  | -<br>0.568<br>4211 | -<br>1.263<br>062  | 0 | 0.098<br>1998<br>4 | 0.763 | 912  | tags=100%,<br>list=43%,<br>signal=176% |
| REACTOME_TRANSPORT_TO_THE_GOLGI_AND_SUBSEQUENT_MODIFICATION | 10 | -<br>0.659<br>1671 | -<br>1.262<br>1448 | 0 | 0.098<br>3964<br>5 | 0.764 | 723  | tags=100%,<br>list=34%,<br>signal=152% |
| SEMENZA_HIF1_TARGETS                                        | 7  | -<br>0.703<br>6329 | -<br>1.258<br>4424 | 0 | 0.101<br>6250<br>5 | 0.78  | 628  | tags=100%,<br>list=30%,<br>signal=142% |
| GAUSSMANN_MLL_AF4_FUSION_TARGETS_A_UP                       | 12 | -<br>0.504<br>552  | -<br>1.258<br>0645 | 0 | 0.101<br>6305<br>4 | 0.781 | 1047 | tags=100%,<br>list=50%,<br>signal=198% |
| KEGG_AUTOIMMUNE_THYROID_DISEASE                             | 7  | -<br>0.628<br>5851 | -<br>1.257<br>0844 | 0 | 0.102<br>1604<br>2 | 0.782 | 785  | tags=100%,<br>list=37%,<br>signal=159% |
| WEST_ADRENOCORTICAL_TUMOR_MARKERS_UP                        | 9  | -<br>0.590<br>9091 | -<br>1.255<br>4739 | 0 | 0.103<br>0323<br>1 | 0.786 | 865  | tags=100%,<br>list=41%,<br>signal=169% |
| PID_INTEGRIN1_PATHWAY                                       | 11 | -<br>0.562<br>7394 | -<br>1.255<br>3418 | 0 | 0.102<br>4534<br>6 | 0.786 | 925  | tags=100%,<br>list=44%,<br>signal=178% |
| REACTOME_SCF_SKP2_MEDIATED_DEGRADATION_OF_P27_P21           | 5  | -<br>0.655<br>2054 | -<br>1.246<br>4771 | 0 | 0.108<br>5261<br>2 | 0.806 | 728  | tags=100%,<br>list=35%,<br>signal=153% |
| WANG_METHYLATED_IN_BREAST_CANCER                            | 9  | -<br>0.569<br>8565 | -<br>1.244<br>9478 | 0 | 0.110<br>3180<br>7 | 0.816 | 909  | tags=100%,<br>list=43%,<br>signal=176% |
| BECKER_TAMOXIFEN_RESISTANCE_DN                              | 9  | -<br>0.583<br>7321 | -<br>1.243<br>6291 | 0 | 0.110<br>9045<br>9 | 0.821 | 880  | tags=100%,<br>list=42%,<br>signal=171% |
| FRIDMAN_SENESCENCE_UP                                       | 14 | -<br>0.466<br>1871 | -<br>1.242<br>9668 | 0 | 0.110<br>9413<br>8 | 0.821 | 1128 | tags=100%,<br>list=54%,<br>signal=215% |
| FUJII_YBX1_TARGETS_UP                                       | 9  | -<br>0.592<br>823  | -<br>1.237<br>7623 | 0 | 0.115<br>3972<br>7 | 0.834 | 861  | tags=100%,<br>list=41%,<br>signal=169% |
| HOLLERN_EMT_BREAST_TUMOR_DN                                 | 10 | -<br>0.594<br>5429 | -<br>1.237<br>6682 | 0 | 0.114<br>8359      | 0.834 | 858  | tags=100%,<br>list=41%,<br>signal=168% |
| ZHU_CMV_ALL_UP                                              | 13 | -<br>0.569<br>9904 | -<br>1.230<br>8488 | 0 | 0.119<br>9478<br>2 | 0.846 | 911  | tags=100%,<br>list=43%,<br>signal=176% |
| REACTOME_G1_S_SPECIFIC_TRANSCRIPTION                        | 6  | -<br>0.655<br>5184 | -<br>1.229<br>9608 | 0 | 0.120<br>4919<br>3 | 0.85  | 728  | tags=100%,<br>list=35%,<br>signal=153% |
| TAKEDA_TARGETS_OF_NUP98_HOXA9_FUSION_16D_UP                 | 18 | -<br>0.541<br>086  | -<br>1.229<br>2576 | 0 | 0.120<br>8011<br>4 | 0.85  | 974  | tags=100%,<br>list=46%,<br>signal=185% |
| AMIT_SERUM_RESPONSE_240_MCF10A                              | 10 | -<br>0.569<br>1719 | -<br>1.221<br>9938 | 0 | 0.127<br>2387<br>8 | 0.865 | 911  | tags=100%,<br>list=43%,<br>signal=176% |
| PID_AURORA_B_PATHWAY                                        | 9  | -<br>0.568<br>4211 | -<br>1.218<br>9617 | 0 | 0.129<br>8735<br>1 | 0.875 | 912  | tags=100%,<br>list=43%,<br>signal=176% |
| WP_COMPLEMENT_SYSTEM_IN_NEURONAL_DEVELOPMENT_AND_PLASTICITY | 9  | -<br>0.629<br>1866 | -<br>1.218<br>3446 | 0 | 0.129<br>9574<br>5 | 0.877 | 785  | tags=100%,<br>list=37%,<br>signal=159% |
| WESTON_VEGFA_TARGETS_6HR                                    | 9  | -<br>0.630<br>622  | -<br>1.217<br>7395 | 0 | 0.130<br>2919<br>8 | 0.88  | 782  | tags=100%,<br>list=37%,<br>signal=159% |
| FONTAINE_FOLLICULAR_THYROID_ADENOMA_DN                      | 10 | -<br>0.570<br>608  | -<br>1.216<br>7404 | 0 | 0.130<br>9002<br>5 | 0.882 | 908  | tags=100%,<br>list=43%,<br>signal=175% |

|                                                          |    |                    |                    |   |                    |       |      |                                        |
|----------------------------------------------------------|----|--------------------|--------------------|---|--------------------|-------|------|----------------------------------------|
| WP_APOPTOSIS                                             | 6  | -<br>0.628<br>2848 | -<br>1.214<br>8101 | 0 | 0.131<br>1845<br>6 | 0.888 | 785  | tags=100%,<br>list=37%,<br>signal=159% |
| RIZ_ERYTHROID_DIFFERENTIATION                            | 6  | -<br>0.614<br>4291 | -<br>1.208<br>6465 | 0 | 0.136<br>1376<br>2 | 0.905 | 814  | tags=100%,<br>list=39%,<br>signal=163% |
| NABA_ECM_REGULATORS                                      | 17 | -<br>0.523<br>0547 | -<br>1.207<br>317  | 0 | 0.137<br>7005<br>7 | 0.908 | 1011 | tags=100%,<br>list=48%,<br>signal=191% |
| MCBRYAN_PUBERTAL_BREAST_4_5WK_DN                         | 13 | -<br>0.517<br>2579 | -<br>1.200<br>2225 | 0 | 0.146<br>8581<br>1 | 0.921 | 1021 | tags=100%,<br>list=49%,<br>signal=194% |
| NAKAMURA_METASTASIS_MODEL_DN                             | 8  | -<br>0.586<br>8006 | -<br>1.199<br>9023 | 0 | 0.146<br>9296<br>2 | 0.921 | 873  | tags=100%,<br>list=42%,<br>signal=171% |
| REN_BOUND_BY_E2F                                         | 9  | -<br>0.540<br>6699 | -<br>1.190<br>9362 | 0 | 0.155<br>1679<br>4 | 0.941 | 970  | tags=100%,<br>list=46%,<br>signal=185% |
| WP_TGFBETA_SIGNALING_PATHWAY                             | 13 | -<br>0.509<br>1084 | -<br>1.187<br>9195 | 0 | 0.157<br>9225<br>4 | 0.943 | 1038 | tags=100%,<br>list=49%,<br>signal=197% |
| SMITH_TERT_TARGETS_UP                                    | 11 | -<br>0.525<br>862  | -<br>1.187<br>8831 | 0 | 0.157<br>6551<br>2 | 0.943 | 1002 | tags=100%,<br>list=48%,<br>signal=190% |
| SHEDDEN_LUNG_CANCER_GOOD_SURVIVAL_A12                    | 9  | -<br>0.626<br>7943 | -<br>1.187<br>0244 | 0 | 0.158<br>3221<br>9 | 0.945 | 790  | tags=100%,<br>list=38%,<br>signal=160% |
| KIM_BIPOLAR_DISORDER_OLIGODENDROCYTE_DENSITY_COR<br>R_DN | 11 | -<br>0.566<br>092  | -<br>1.185<br>1605 | 0 | 0.158<br>1772<br>9 | 0.946 | 918  | tags=100%,<br>list=44%,<br>signal=177% |
| KOKKINAKIS_METHIONINE_DEPRIVATION_48HR_UP                | 18 | -<br>0.502<br>643  | -<br>1.184<br>598  | 0 | 0.157<br>7170<br>3 | 0.946 | 1054 | tags=100%,<br>list=50%,<br>signal=199% |
| NAKAYAMA_SOFT_TISSUE_TUMORS_PCA1_UP                      | 13 | -<br>0.501<br>4381 | -<br>1.183<br>2578 | 0 | 0.159<br>1416      | 0.949 | 1054 | tags=100%,<br>list=50%,<br>signal=200% |
| HUANG_GATA2_TARGETS_UP                                   | 10 | -<br>0.536<br>1417 | -<br>1.179<br>9409 | 0 | 0.162<br>3893<br>5 | 0.955 | 980  | tags=100%,<br>list=47%,<br>signal=187% |
| BYSTRYKH_HEMATOPOIESIS_STEM_CELL_AND_BRAIN_QTL_T<br>RANS | 8  | -<br>0.586<br>8006 | -<br>1.166<br>6522 | 0 | 0.180<br>2113      | 0.972 | 873  | tags=100%,<br>list=42%,<br>signal=171% |
| TSUNODA_CISPLATIN_RESISTANCE_DN                          | 9  | -<br>0.562<br>201  | -<br>1.166<br>2532 | 0 | 0.180<br>1762<br>4 | 0.972 | 925  | tags=100%,<br>list=44%,<br>signal=178% |
| PLASARI_TGFB1_SIGNALING_VIA_NFIC_10HR_UP                 | 11 | -<br>0.504<br>3103 | -<br>1.164<br>8229 | 0 | 0.181<br>3346<br>3 | 0.973 | 1047 | tags=100%,<br>list=50%,<br>signal=198% |
| GRUETZMANN_PANCREATIC_CANCER_DN                          | 12 | -<br>0.543<br>3637 | -<br>1.161<br>2904 | 0 | 0.185<br>0457<br>5 | 0.978 | 966  | tags=100%,<br>list=46%,<br>signal=184% |
| REACTOME_ASPARAGINE_N_LINKED_GLYCOSYLATION               | 13 | -<br>0.536<br>9127 | -<br>1.157<br>6227 | 0 | 0.189<br>2060<br>8 | 0.98  | 980  | tags=100%,<br>list=47%,<br>signal=186% |
| HOLLERN_EMT_BREAST_TUMOR_UP                              | 14 | -<br>0.475<br>2998 | -<br>1.156<br>3594 | 0 | 0.190<br>0709<br>4 | 0.98  | 1109 | tags=100%,<br>list=53%,<br>signal=211% |
| WP_G1_TO_S_CELL_CYCLE_CONTROL                            | 8  | -<br>0.540<br>4113 | -<br>1.152<br>7084 | 0 | 0.193<br>5356<br>3 | 0.981 | 970  | tags=100%,<br>list=46%,<br>signal=185% |
| GHANDHI_BYSTANDER_IRRADIATION_UP                         | 17 | -<br>0.504<br>3228 | -<br>1.152<br>5797 | 0 | 0.192<br>7894<br>8 | 0.981 | 1050 | tags=100%,<br>list=50%,<br>signal=198% |
| WANG_ESOPHAGUS_CANCER_VS_NORMAL_UP                       | 14 | -<br>0.547<br>2422 | -<br>1.152<br>5253 | 0 | 0.192<br>5398      | 0.981 | 959  | tags=100%,<br>list=46%,<br>signal=183% |
| ZHANG_GATA6_TARGETS_DN                                   | 9  | -<br>0.554<br>5455 | -<br>1.148<br>6621 | 0 | 0.198<br>1897<br>2 | 0.983 | 941  | tags=100%,<br>list=45%,<br>signal=180% |
| GEISS_RESPONSE_TO_DSRNA_UP                               | 9  | -<br>0.568<br>8995 | -<br>1.147<br>6834 | 0 | 0.199<br>1888<br>9 | 0.984 | 911  | tags=100%,<br>list=43%,<br>signal=176% |
| MEBARKI_HCC_PROGENITOR_WNT_UP_BLOCKED_BY_FZD8CR<br>D     | 14 | -<br>0.472<br>9017 | -<br>1.146<br>5116 | 0 | 0.200<br>9665      | 0.984 | 1114 | tags=100%,<br>list=53%,<br>signal=212% |
| PID_FRA_PATHWAY                                          | 9  | -<br>0.500<br>4785 | -<br>1.145<br>6736 | 0 | 0.202<br>2783<br>9 | 0.984 | 1054 | tags=100%,<br>list=50%,<br>signal=200% |

|                                                  |    |                    |                    |   |                    |       |      |                                        |
|--------------------------------------------------|----|--------------------|--------------------|---|--------------------|-------|------|----------------------------------------|
| HESS_TARGETS_OF_HOXA9_AND_MEIS1_DN               | 8  | -<br>0.545<br>6719 | -<br>1.145<br>0896 | 0 | 0.202<br>2695      | 0.984 | 959  | tags=100%,<br>list=46%,<br>signal=183% |
| ZHU_CMV_8_HR_UP                                  | 8  | -<br>0.568<br>6275 | -<br>1.140<br>3909 | 0 | 0.207<br>6836<br>1 | 0.987 | 911  | tags=100%,<br>list=43%,<br>signal=176% |
| CROONQUIST_STROMAL_STIMULATION_UP                | 11 | -<br>0.521<br>5517 | -<br>1.139<br>7175 | 0 | 0.208<br>3866<br>6 | 0.987 | 1011 | tags=100%,<br>list=48%,<br>signal=192% |
| VANDESLUIS_COMMD1_TARGETS_GROUP_3_UP             | 13 | -<br>0.567<br>1141 | -<br>1.134<br>2282 | 0 | 0.216<br>4887<br>5 | 0.989 | 917  | tags=100%,<br>list=44%,<br>signal=176% |
| FRASOR_RESPONSE_TO_SERM_OR_FULVESTRANT_DN        | 9  | -<br>0.540<br>6699 | -<br>1.124<br>8258 | 0 | 0.229<br>8857      | 0.993 | 970  | tags=100%,<br>list=46%,<br>signal=185% |
| PEDERSEN_TARGETS_OF_611CTF_ISOFORM_OF_ERBB2      | 12 | -<br>0.488<br>2607 | -<br>1.121<br>3205 | 0 | 0.232<br>0857<br>2 | 0.993 | 1081 | tags=100%,<br>list=52%,<br>signal=205% |
| REACTOME_RESOLUTION_OF_SISTER_CHROMATID_COHESION | 14 | -<br>0.462<br>8297 | -<br>1.118<br>8406 | 0 | 0.235<br>8265<br>7 | 0.995 | 1135 | tags=100%,<br>list=54%,<br>signal=216% |
| YAO_TEMPORAL_RESPONSE_TO_PROGESTERONE_CLUSTER_0  | 8  | -<br>0.520<br>8035 | -<br>1.115<br>2709 | 0 | 0.239<br>9611<br>3 | 0.995 | 1011 | tags=100%,<br>list=48%,<br>signal=192% |
| VANOEVELEN_MYOGENESIS_SIN3A_TARGETS              | 10 | -<br>0.539<br>4926 | -<br>1.111<br>9882 | 0 | 0.243<br>8932<br>7 | 0.997 | 973  | tags=100%,<br>list=46%,<br>signal=186% |
| WP_BURN_WOUND_HEALING                            | 14 | -<br>0.501<br>6787 | -<br>1.104<br>5406 | 0 | 0.255<br>4807<br>7 | 0.999 | 1054 | tags=100%,<br>list=50%,<br>signal=200% |
| KATSANOUELAVLI_TARGETS_DN                        | 16 | -<br>0.489<br>1983 | -<br>1.094<br>522  | 0 | 0.267<br>2557<br>5 | 0.999 | 1081 | tags=100%,<br>list=52%,<br>signal=205% |
| CHYLA_CBFA2T3_TARGETS_DN                         | 15 | -<br>0.515<br>8349 | -<br>1.090<br>8169 | 0 | 0.270<br>6672      | 1     | 1025 | tags=100%,<br>list=49%,<br>signal=194% |
| REACTOME_CELL_CELL_COMMUNICATION                 | 10 | -<br>0.517<br>4725 | -<br>1.089<br>7176 | 0 | 0.272<br>5173      | 1     | 1019 | tags=100%,<br>list=49%,<br>signal=193% |
| BILD_MYC_ONCOGENIC_SIGNATURE                     | 12 | -<br>0.472<br>9276 | -<br>1.089<br>404  | 0 | 0.272<br>7935<br>3 | 1     | 1113 | tags=100%,<br>list=53%,<br>signal=212% |
| SESTO_RESPONSE_TO_UV_C7                          | 10 | -<br>0.496<br>8885 | -<br>1.088<br>0502 | 0 | 0.274<br>0344<br>7 | 1     | 1062 | tags=100%,<br>list=51%,<br>signal=201% |
| REACTOME_M_PHASE                                 | 19 | -<br>0.463<br>9423 | -<br>1.087<br>9369 | 0 | 0.273<br>6934      | 1     | 1135 | tags=100%,<br>list=54%,<br>signal=216% |
| ACEVEDO_LIVER_CANCER_WITH_H3K9ME3_UP             | 10 | -<br>0.539<br>0139 | -<br>1.075<br>4536 | 0 | 0.293<br>0384<br>6 | 1     | 974  | tags=100%,<br>list=46%,<br>signal=186% |
| GRAHAM_CML_QUIESCENT_VS_NORMAL_QUIESCENT_DN      | 11 | -<br>0.516<br>7624 | -<br>1.066<br>2055 | 0 | 0.306<br>2288      | 1     | 1021 | tags=100%,<br>list=49%,<br>signal=194% |
| LEE_NEURAL_CREST_STEM_CELL_DN                    | 13 | -<br>0.420<br>9012 | -<br>1.065<br>534  | 0 | 0.306<br>6606      | 1     | 1222 | tags=100%,<br>list=58%,<br>signal=238% |
| REACTOME_MITOTIC_G2_G2_M_PHASES                  | 12 | -<br>0.505<br>9894 | -<br>1.063<br>4441 | 0 | 0.309<br>7497<br>2 | 1     | 1044 | tags=100%,<br>list=50%,<br>signal=198% |
| DELPUECH_FOXO3_TARGETS_UP                        | 11 | -<br>0.570<br>4023 | -<br>1.057<br>7264 | 0 | 0.320<br>3477<br>3 | 1     | 909  | tags=100%,<br>list=43%,<br>signal=175% |
| RAO_BOUND_BY_SALL4_ISOFORM_A                     | 12 | -<br>0.462<br>8654 | -<br>1.054<br>5852 | 0 | 0.323<br>9162      | 1     | 1134 | tags=100%,<br>list=54%,<br>signal=216% |
| WP_NEUROINFLAMMATION_AND_GLUTAMATERGIC_SIGNALING | 11 | -<br>0.458<br>3333 | -<br>1.053<br>9647 | 0 | 0.323<br>3919<br>4 | 1     | 1143 | tags=100%,<br>list=54%,<br>signal=218% |
| IBRAHIM_NRF1_UP                                  | 13 | -<br>0.503<br>3557 | -<br>1.047<br>9041 | 0 | 0.334<br>6873<br>5 | 1     | 1050 | tags=100%,<br>list=50%,<br>signal=199% |
| ISSAEVA_MLL2_TARGETS                             | 11 | -<br>0.494<br>2529 | -<br>1.041<br>898  | 0 | 0.345<br>4207      | 1     | 1068 | tags=100%,<br>list=51%,<br>signal=203% |
| REACTOME_SEPARATION_OF_SISTER_CHROMATIDS         | 12 | -<br>0.462<br>3862 | -<br>1.039<br>3107 | 0 | 0.347<br>9170<br>2 | 1     | 1135 | tags=100%,<br>list=54%,<br>signal=216% |

|                                           |    |                    |                    |   |                    |       |      |                                        |
|-------------------------------------------|----|--------------------|--------------------|---|--------------------|-------|------|----------------------------------------|
| BROWNE_HCMV_INFECTION_30MIN_DN            | 13 | -<br>0.435<br>2829 | -<br>1.034<br>7579 | 0 | 0.355<br>8717<br>7 | 1     | 1192 | tags=100%,<br>list=57%,<br>signal=230% |
| KAAB_HEART_ATRIUM_VS_VENTRICLE_DN         | 10 | -<br>0.513<br>1642 | -<br>1.031<br>2649 | 0 | 0.363<br>0679<br>5 | 1     | 1028 | tags=100%,<br>list=49%,<br>signal=195% |
| DAVICIONI_TARGETS_OF_PAX_FOXO1_FUSIONS_DN | 11 | -<br>0.441<br>5709 | -<br>1.007<br>6503 | 0 | 0.403<br>7818<br>6 | 1     | 1178 | tags=100%,<br>list=56%,<br>signal=227% |
| FONTAINE_PAPILLARY_THYROID_CARCINOMA_UP   | 12 | -<br>0.509<br>3436 | -<br>1.007<br>583  | 0 | 0.403<br>3043<br>4 | 1     | 1037 | tags=100%,<br>list=49%,<br>signal=197% |
| THRA_TARGET_GENES                         | 5  | -<br>0.893<br>9828 | -<br>1.650<br>3086 | 0 | 0.001<br>5491<br>8 | 0.006 | 228  | tags=100%,<br>list=11%,<br>signal=112% |
| MIR3913_3P                                | 5  | -<br>0.863<br>4193 | -<br>1.585<br>9114 | 0 | 0.003<br>1972<br>7 | 0.013 | 292  | tags=100%,<br>list=14%,<br>signal=116% |
| MIR7150                                   | 7  | -<br>0.820<br>2677 | -<br>1.567<br>696  | 0 | 0.005<br>1583<br>5 | 0.021 | 384  | tags=100%,<br>list=18%,<br>signal=122% |
| MIR4778_5P                                | 6  | -<br>0.808<br>8868 | -<br>1.538<br>6713 | 0 | 0.010<br>5124<br>2 | 0.042 | 407  | tags=100%,<br>list=19%,<br>signal=124% |
| STAT6_01                                  | 9  | -<br>0.739<br>2345 | -<br>1.494<br>6791 | 0 | 0.021<br>6217<br>9 | 0.087 | 555  | tags=100%,<br>list=26%,<br>signal=135% |
| NR1I2_TARGET_GENES                        | 6  | -<br>0.741<br>0416 | -<br>1.477<br>5078 | 0 | 0.025<br>3923<br>7 | 0.104 | 549  | tags=100%,<br>list=26%,<br>signal=135% |
| PAX4_04                                   | 6  | -<br>0.774<br>4864 | -<br>1.455<br>0031 | 0 | 0.035<br>4441<br>3 | 0.143 | 479  | tags=100%,<br>list=23%,<br>signal=129% |
| MIR6894_3P                                | 6  | -<br>0.744<br>8639 | -<br>1.447<br>7795 | 0 | 0.040<br>9482<br>1 | 0.163 | 541  | tags=100%,<br>list=26%,<br>signal=134% |
| MIR6840_3P                                | 8  | -<br>0.692<br>9699 | -<br>1.447<br>0103 | 0 | 0.041<br>0238      | 0.166 | 651  | tags=100%,<br>list=31%,<br>signal=144% |
| MIR1825                                   | 8  | -<br>0.745<br>0981 | -<br>1.445<br>567  | 0 | 0.040<br>9821<br>2 | 0.169 | 542  | tags=100%,<br>list=26%,<br>signal=134% |
| MIR4772_3P                                | 8  | -<br>0.745<br>5763 | -<br>1.445<br>1911 | 0 | 0.040<br>4283<br>1 | 0.169 | 541  | tags=100%,<br>list=26%,<br>signal=134% |
| MIR6854_5P                                | 7  | -<br>0.736<br>6157 | -<br>1.443<br>9901 | 0 | 0.040<br>3849<br>3 | 0.171 | 559  | tags=100%,<br>list=27%,<br>signal=136% |
| MIR6845_3P                                | 6  | -<br>0.744<br>8639 | -<br>1.433<br>5632 | 0 | 0.045<br>1536<br>4 | 0.191 | 541  | tags=100%,<br>list=26%,<br>signal=134% |
| MIR1261                                   | 6  | -<br>0.747<br>7306 | -<br>1.429<br>3743 | 0 | 0.046<br>2682<br>9 | 0.198 | 535  | tags=100%,<br>list=25%,<br>signal=134% |
| MIR150_5P                                 | 13 | -<br>0.631<br>3519 | -<br>1.425<br>3247 | 0 | 0.047<br>9744<br>9 | 0.209 | 783  | tags=100%,<br>list=37%,<br>signal=159% |
| MIR4693_5P                                | 9  | -<br>0.668<br>8995 | -<br>1.415<br>2663 | 0 | 0.052<br>7509<br>2 | 0.231 | 702  | tags=100%,<br>list=33%,<br>signal=150% |
| MIR4432                                   | 8  | -<br>0.663<br>7973 | -<br>1.407<br>9119 | 0 | 0.055<br>8934<br>6 | 0.251 | 712  | tags=100%,<br>list=34%,<br>signal=151% |
| MIR136_5P                                 | 6  | -<br>0.692<br>3077 | -<br>1.392<br>2956 | 0 | 0.066<br>3257<br>8 | 0.29  | 651  | tags=100%,<br>list=31%,<br>signal=145% |
| MIR3679_5P                                | 5  | -<br>0.747<br>3735 | -<br>1.384<br>4526 | 0 | 0.071<br>1653<br>8 | 0.311 | 535  | tags=100%,<br>list=25%,<br>signal=134% |
| MIR4762_5P                                | 7  | -<br>0.726<br>5775 | -<br>1.381<br>051  | 0 | 0.073<br>7562<br>3 | 0.324 | 580  | tags=100%,<br>list=28%,<br>signal=138% |
| TCF1P_Q6                                  | 18 | -<br>0.543<br>0082 | -<br>1.379<br>7313 | 0 | 0.074<br>4528<br>6 | 0.329 | 970  | tags=100%,<br>list=46%,<br>signal=184% |
| MIR342_3P                                 | 6  | -<br>0.692<br>3077 | -<br>1.373<br>8939 | 0 | 0.077<br>3816<br>1 | 0.343 | 651  | tags=100%,<br>list=31%,<br>signal=145% |

|                     |    |                    |                    |   |                    |       |      |                                        |
|---------------------|----|--------------------|--------------------|---|--------------------|-------|------|----------------------------------------|
| MIR6750_3P          | 6  | -<br>0.720<br>9747 | -<br>1.346<br>258  | 0 | 0.103<br>0327<br>4 | 0.435 | 591  | tags=100%,<br>list=28%,<br>signal=139% |
| MIR6732_3P          | 5  | -<br>0.750<br>7163 | -<br>1.343<br>7364 | 0 | 0.104<br>5965<br>4 | 0.443 | 528  | tags=100%,<br>list=25%,<br>signal=133% |
| MIR501_5P           | 7  | -<br>0.694<br>5507 | -<br>1.337<br>095  | 0 | 0.111<br>3514<br>2 | 0.465 | 647  | tags=100%,<br>list=31%,<br>signal=144% |
| MIR4441             | 9  | -<br>0.633<br>9713 | -<br>1.326<br>085  | 0 | 0.120<br>7174<br>1 | 0.496 | 775  | tags=100%,<br>list=37%,<br>signal=158% |
| MIR146A_3P          | 9  | -<br>0.597<br>6077 | -<br>1.320<br>2959 | 0 | 0.125<br>7737<br>6 | 0.514 | 851  | tags=100%,<br>list=41%,<br>signal=167% |
| MIR1_TARGET_GENES   | 9  | -<br>0.622<br>9665 | -<br>1.320<br>1522 | 0 | 0.124<br>8902<br>3 | 0.516 | 798  | tags=100%,<br>list=38%,<br>signal=161% |
| MIR1200             | 9  | -<br>0.570<br>3349 | -<br>1.318<br>9489 | 0 | 0.125<br>2503<br>7 | 0.521 | 908  | tags=100%,<br>list=43%,<br>signal=175% |
| HOXA10_TARGET_GENES | 8  | -<br>0.626<br>0163 | -<br>1.316<br>4198 | 0 | 0.127<br>6410<br>7 | 0.53  | 791  | tags=100%,<br>list=38%,<br>signal=160% |
| MIR199A_5P          | 11 | -<br>0.609<br>1954 | -<br>1.312<br>9646 | 0 | 0.130<br>5751<br>2 | 0.543 | 828  | tags=100%,<br>list=39%,<br>signal=164% |
| MIR199B_5P          | 11 | -<br>0.609<br>1954 | -<br>1.290<br>0609 | 0 | 0.164<br>1067<br>4 | 0.636 | 828  | tags=100%,<br>list=39%,<br>signal=164% |
| MIR12122            | 10 | -<br>0.667<br>3049 | -<br>1.289<br>5468 | 0 | 0.163<br>0661<br>3 | 0.638 | 706  | tags=100%,<br>list=34%,<br>signal=150% |
| MIR4713_5P          | 9  | -<br>0.645<br>933  | -<br>1.288<br>783  | 0 | 0.163<br>2084<br>5 | 0.642 | 750  | tags=100%,<br>list=36%,<br>signal=155% |
| MIR6851_5P          | 7  | -<br>0.607<br>5526 | -<br>1.285<br>4614 | 0 | 0.166<br>7331<br>9 | 0.658 | 829  | tags=100%,<br>list=39%,<br>signal=165% |
| MIR4736             | 6  | -<br>0.667<br>463  | -<br>1.270<br>3369 | 0 | 0.188<br>5445<br>4 | 0.711 | 703  | tags=100%,<br>list=33%,<br>signal=150% |
| NKX62_Q2            | 9  | -<br>0.611<br>0048 | -<br>1.233<br>8164 | 0 | 0.244<br>2229<br>7 | 0.809 | 823  | tags=100%,<br>list=39%,<br>signal=164% |
| AACTGAC_MIR223      | 9  | -<br>0.540<br>1914 | -<br>1.229<br>0442 | 0 | 0.243<br>9731      | 0.816 | 971  | tags=100%,<br>list=46%,<br>signal=185% |
| OCT1_06             | 13 | -<br>0.518<br>6961 | -<br>1.223<br>5205 | 0 | 0.245<br>4437<br>2 | 0.834 | 1018 | tags=100%,<br>list=48%,<br>signal=193% |
| PHF21A_TARGET_GENES | 12 | -<br>0.546<br>7178 | -<br>1.216<br>4179 | 0 | 0.255<br>9331<br>7 | 0.854 | 959  | tags=100%,<br>list=46%,<br>signal=183% |
| MIR1236_5P          | 8  | -<br>0.582<br>9747 | -<br>1.215<br>4641 | 0 | 0.256<br>466       | 0.857 | 881  | tags=100%,<br>list=42%,<br>signal=172% |
| MIR183_3P           | 10 | -<br>0.545<br>7156 | -<br>1.214<br>7043 | 0 | 0.254<br>1513<br>7 | 0.858 | 960  | tags=100%,<br>list=46%,<br>signal=183% |
| MIR504_3P           | 8  | -<br>0.566<br>7145 | -<br>1.214<br>4948 | 0 | 0.252<br>6955<br>3 | 0.858 | 915  | tags=100%,<br>list=44%,<br>signal=177% |
| GGCAGTG_MIR3243P    | 10 | -<br>0.538<br>0565 | -<br>1.209<br>7584 | 0 | 0.264<br>6228<br>4 | 0.872 | 976  | tags=100%,<br>list=46%,<br>signal=186% |
| AGGGCAG_MIR18A      | 8  | -<br>0.589<br>67   | -<br>1.193<br>6108 | 0 | 0.298<br>5817<br>8 | 0.907 | 867  | tags=100%,<br>list=41%,<br>signal=170% |
| H1_6_TARGET_GENES   | 15 | -<br>0.470<br>2495 | -<br>1.187<br>8787 | 0 | 0.310<br>8653<br>4 | 0.914 | 1120 | tags=100%,<br>list=53%,<br>signal=213% |
| MIR4513             | 7  | -<br>0.566<br>4436 | -<br>1.174<br>4947 | 0 | 0.330<br>4421<br>3 | 0.94  | 915  | tags=100%,<br>list=44%,<br>signal=177% |
| OCT1_03             | 14 | -<br>0.501<br>6787 | -<br>1.173<br>9619 | 0 | 0.327<br>3669<br>8 | 0.94  | 1054 | tags=100%,<br>list=50%,<br>signal=200% |



|                       |    |                    |                    |   |                    |       |      |                                        |
|-----------------------|----|--------------------|--------------------|---|--------------------|-------|------|----------------------------------------|
| MIR140_3P             | 11 | -<br>0.594<br>3487 | -<br>1.172<br>4138 | 0 | 0.327<br>3187<br>6 | 0.941 | 859  | tags=100%,<br>list=41%,<br>signal=168% |
| MIR199A_3P_MIR199B_3P | 13 | -<br>0.497<br>1237 | -<br>1.170<br>8694 | 0 | 0.324<br>1908<br>3 | 0.941 | 1063 | tags=100%,<br>list=51%,<br>signal=201% |
| HSF1_01               | 10 | -<br>0.516<br>5151 | -<br>1.169<br>376  | 0 | 0.321<br>2507<br>4 | 0.944 | 1021 | tags=100%,<br>list=49%,<br>signal=194% |
| AAANWWTGC_UNKNOWN     | 12 | -<br>0.518<br>4475 | -<br>1.163<br>4408 | 0 | 0.330<br>6034<br>2 | 0.949 | 1018 | tags=100%,<br>list=48%,<br>signal=193% |
| MIR5703               | 8  | -<br>0.546<br>1502 | -<br>1.155<br>2857 | 0 | 0.350<br>425       | 0.959 | 958  | tags=100%,<br>list=46%,<br>signal=183% |
| SRF_Q5_01             | 11 | -<br>0.517<br>7203 | -<br>1.152<br>8617 | 0 | 0.355<br>3983<br>6 | 0.959 | 1019 | tags=100%,<br>list=49%,<br>signal=193% |
| GTCTTCC_MIR7          | 9  | -<br>0.542<br>5837 | -<br>1.151<br>8537 | 0 | 0.356<br>1003<br>5 | 0.961 | 966  | tags=100%,<br>list=46%,<br>signal=184% |
| MIR6853_3P            | 12 | -<br>0.499<br>2813 | -<br>1.147<br>156  | 0 | 0.363<br>8958      | 0.964 | 1058 | tags=100%,<br>list=50%,<br>signal=200% |
| STAT1_03              | 9  | -<br>0.542<br>5837 | -<br>1.143<br>1451 | 0 | 0.372<br>4222<br>2 | 0.967 | 966  | tags=100%,<br>list=46%,<br>signal=184% |
| RSRFC4_Q2             | 9  | -<br>0.508<br>6125 | -<br>1.143<br>0109 | 0 | 0.370<br>5727<br>2 | 0.968 | 1037 | tags=100%,<br>list=49%,<br>signal=197% |
| NGFIC_01              | 11 | -<br>0.512<br>4521 | -<br>1.142<br>1164 | 0 | 0.371<br>1131<br>5 | 0.968 | 1030 | tags=100%,<br>list=49%,<br>signal=195% |
| MIR1323               | 13 | -<br>0.463<br>5666 | -<br>1.141<br>6764 | 0 | 0.369<br>2188      | 0.968 | 1133 | tags=100%,<br>list=54%,<br>signal=216% |
| IPF1_Q4               | 14 | -<br>0.501<br>6787 | -<br>1.140<br>676  | 0 | 0.370<br>5522<br>4 | 0.97  | 1054 | tags=100%,<br>list=50%,<br>signal=200% |
| GCCNNNWTAAAR_UNKNOWN  | 12 | -<br>0.518<br>4475 | -<br>1.138<br>5479 | 0 | 0.372<br>2879<br>6 | 0.971 | 1018 | tags=100%,<br>list=48%,<br>signal=193% |
| GATA_Q6               | 13 | -<br>0.491<br>3711 | -<br>1.134<br>2678 | 0 | 0.367<br>7963<br>3 | 0.975 | 1075 | tags=100%,<br>list=51%,<br>signal=204% |
| RSRFC4_01             | 11 | -<br>0.509<br>0996 | -<br>1.132<br>0554 | 0 | 0.370<br>1384      | 0.977 | 1037 | tags=100%,<br>list=49%,<br>signal=197% |
| AHRARNT_01            | 8  | -<br>0.542<br>3242 | -<br>1.131<br>0183 | 0 | 0.368<br>7222<br>6 | 0.977 | 966  | tags=100%,<br>list=46%,<br>signal=185% |
| AP3_Q6                | 13 | -<br>0.494<br>7268 | -<br>1.125<br>409  | 0 | 0.373<br>987       | 0.982 | 1068 | tags=100%,<br>list=51%,<br>signal=202% |
| MIR892C_3P            | 12 | -<br>0.463<br>8237 | -<br>1.122<br>5358 | 0 | 0.377<br>3138<br>2 | 0.983 | 1132 | tags=100%,<br>list=54%,<br>signal=216% |
| MIR212_3P             | 12 | -<br>0.481<br>0733 | -<br>1.122<br>4147 | 0 | 0.375<br>5701<br>2 | 0.983 | 1096 | tags=100%,<br>list=52%,<br>signal=208% |
| TATA_C                | 11 | -<br>0.518<br>1992 | -<br>1.120<br>8563 | 0 | 0.375<br>6033<br>2 | 0.984 | 1018 | tags=100%,<br>list=48%,<br>signal=193% |
| MIR7153_5P            | 9  | -<br>0.477<br>9904 | -<br>1.116<br>617  | 0 | 0.385<br>1567<br>2 | 0.985 | 1101 | tags=100%,<br>list=52%,<br>signal=209% |
| MIR6818_3P            | 12 | -<br>0.509<br>8227 | -<br>1.112<br>9707 | 0 | 0.393<br>5358      | 0.987 | 1036 | tags=100%,<br>list=49%,<br>signal=196% |
| MIR589_3P             | 18 | -<br>0.442<br>5757 | -<br>1.105<br>6423 | 0 | 0.407<br>1393<br>3 | 0.988 | 1179 | tags=100%,<br>list=56%,<br>signal=226% |
| MIR4533               | 15 | -<br>0.456<br>334  | -<br>1.104<br>5296 | 0 | 0.404<br>2242<br>2 | 0.988 | 1149 | tags=100%,<br>list=55%,<br>signal=219% |
| SRF_Q6                | 11 | -<br>0.517<br>7203 | -<br>1.096<br>3489 | 0 | 0.420<br>1198<br>8 | 0.993 | 1019 | tags=100%,<br>list=49%,<br>signal=193% |

|                                                                              |    |                    |                    |                    |                    |       |      |                                        |
|------------------------------------------------------------------------------|----|--------------------|--------------------|--------------------|--------------------|-------|------|----------------------------------------|
| TFIIH_Q6                                                                     | 13 | -<br>0.467<br>4017 | -<br>1.093<br>0494 | 0                  | 0.428<br>1573<br>6 | 0.993 | 1125 | tags=100%,<br>list=54%,<br>signal=214% |
| MIR7151_3P                                                                   | 12 | -<br>0.503<br>1145 | -<br>1.090<br>3428 | 0                  | 0.430<br>4747<br>6 | 0.994 | 1050 | tags=100%,<br>list=50%,<br>signal=199% |
| MIR21_5P                                                                     | 11 | -<br>0.474<br>6169 | -<br>1.089<br>9092 | 0                  | 0.429<br>8309<br>7 | 0.994 | 1109 | tags=100%,<br>list=53%,<br>signal=211% |
| MSX1_01                                                                      | 9  | -<br>0.496<br>6507 | -<br>1.075<br>0906 | 0                  | 0.448<br>4203<br>5 | 0.998 | 1062 | tags=100%,<br>list=51%,<br>signal=202% |
| TCF11_01                                                                     | 13 | -<br>0.568<br>0729 | -<br>1.069<br>4946 | 0                  | 0.456<br>8752      | 0.998 | 915  | tags=100%,<br>list=44%,<br>signal=176% |
| GATA_C                                                                       | 10 | -<br>0.500<br>7181 | -<br>1.066<br>8026 | 0                  | 0.460<br>7156<br>2 | 0.999 | 1054 | tags=100%,<br>list=50%,<br>signal=200% |
| MIR6885_3P                                                                   | 11 | -<br>0.474<br>6169 | -<br>1.066<br>7384 | 0                  | 0.458<br>8825      | 0.999 | 1109 | tags=100%,<br>list=53%,<br>signal=211% |
| MIR3692_3P                                                                   | 16 | -<br>0.432<br>0692 | -<br>1.063<br>8299 | 0                  | 0.462<br>2876<br>6 | 0.999 | 1200 | tags=100%,<br>list=57%,<br>signal=232% |
| HNF3B_01                                                                     | 15 | -<br>0.470<br>2495 | -<br>1.057<br>1737 | 0                  | 0.469<br>6712      | 0.999 | 1120 | tags=100%,<br>list=53%,<br>signal=213% |
| MIR3663_3P                                                                   | 11 | -<br>0.462<br>6437 | -<br>1.054<br>5851 | 0                  | 0.467<br>6722<br>6 | 0.999 | 1134 | tags=100%,<br>list=54%,<br>signal=216% |
| MIR4310                                                                      | 14 | -<br>0.475<br>2998 | -<br>1.038<br>7841 | 0                  | 0.473<br>7470<br>7 | 0.999 | 1109 | tags=100%,<br>list=53%,<br>signal=211% |
| MIR6881_3P                                                                   | 13 | -<br>0.505<br>7526 | -<br>1.037<br>3647 | 0                  | 0.474<br>8951<br>8 | 0.999 | 1045 | tags=100%,<br>list=50%,<br>signal=198% |
| TGTTTAC_MIR30A5P_MIR30C_MIR30D_MIR30B_MIR30E5P                               | 21 | -<br>0.410<br>4909 | -<br>1.016<br>6866 | 0                  | 0.502<br>6224      | 0.999 | 1247 | tags=100%,<br>list=59%,<br>signal=244% |
| <a href="#">HALLMARK_IL6_JAK_STAT3_SIGNALING</a>                             | 12 | -<br>0.630<br>091  | -<br>1.521<br>9908 | 0                  | 0.003<br>0637<br>3 | 0.001 | 785  | tags=100%,<br>list=37%,<br>signal=159% |
| <a href="#">HALLMARK_KRAS_SIGNALING_DN</a>                                   | 12 | -<br>0.498<br>3229 | -<br>1.212<br>1212 | 0                  | 0.037<br>5817      | 0.018 | 1060 | tags=100%,<br>list=51%,<br>signal=201% |
| BIOCARTA_EICOSANOID_PATHWAY                                                  | 5  | -<br>0.649<br>9522 | -<br>1.235<br>4403 | 0.017<br>5438<br>6 | 0.116<br>2506      | 0.837 | 739  | tags=100%,<br>list=35%,<br>signal=154% |
| WILENSKY_RESPONSE_TO_DARAPLADIB                                              | 5  | -<br>0.817<br>0965 | -<br>1.541<br>144  | 0.017<br>8571<br>4 | 0.008<br>4554<br>9 | 0.056 | 389  | tags=100%,<br>list=19%,<br>signal=122% |
| WP_FGFR3_SIGNALING_IN_CHONDROCYTE_PROLIFERATION_AND_TERMINAL_DIFFERENTIATION | 5  | -<br>0.733<br>5243 | -<br>1.341<br>9032 | 0.017<br>8571<br>4 | 0.059<br>4097<br>3 | 0.487 | 564  | tags=100%,<br>list=27%,<br>signal=136% |
| WP_TGFBETA_SIGNALING_IN_THYROID_CELLS_FOR_EPITHELIAL_MESENCHYMAL_TRANSITION  | 5  | -<br>0.796<br>0841 | -<br>1.431<br>5505 | 0.018<br>8679<br>3 | 0.024<br>7720<br>6 | 0.204 | 433  | tags=100%,<br>list=21%,<br>signal=126% |
| BEGUM_TARGETS_OF_PAX3_FOXO1_FUSION_DN                                        | 5  | -<br>0.792<br>2636 | -<br>1.457<br>8946 | 0.019<br>2307<br>7 | 0.019<br>3867<br>8 | 0.152 | 441  | tags=100%,<br>list=21%,<br>signal=126% |
| LUI_THYROID_CANCER_CLUSTER_4                                                 | 5  | -<br>0.718<br>7201 | -<br>1.391<br>2255 | 0.02<br>5360<br>1  | 0.038<br>5360<br>1 | 0.32  | 595  | tags=100%,<br>list=28%,<br>signal=139% |
| LINDSTEDT_DENDRITIC_CELL_MATURATION_D                                        | 5  | -<br>0.755<br>9694 | -<br>1.392<br>9641 | 0.021<br>2766<br>6 | 0.037<br>4860<br>6 | 0.31  | 517  | tags=100%,<br>list=25%,<br>signal=132% |
| CHIN_BREAST_CANCER_COPY_NUMBER_UP                                            | 5  | -<br>0.705<br>3486 | -<br>1.321<br>7127 | 0.021<br>2766      | 0.069<br>8464      | 0.569 | 623  | tags=100%,<br>list=30%,<br>signal=142% |
| MIR6729_3P                                                                   | 5  | -<br>0.787<br>488  | -<br>1.414<br>0785 | 0.021<br>7391<br>3 | 0.052<br>8557<br>9 | 0.235 | 451  | tags=100%,<br>list=21%,<br>signal=127% |
| REACTOME_AMYLOID_FIBER_FORMATION                                             | 5  | -<br>0.704<br>8711 | -<br>1.299<br>0099 | 0.022<br>7272<br>7 | 0.078<br>6089<br>9 | 0.639 | 624  | tags=100%,<br>list=30%,<br>signal=142% |
| MAHADEVAN_GIST_MORPHOLOGICAL_SWITCH                                          | 5  | -<br>0.750<br>2388 | -<br>1.415<br>9383 | 0.023<br>2558<br>1 | 0.030<br>1888<br>6 | 0.245 | 529  | tags=100%,<br>list=25%,<br>signal=133% |

|                                                                                                                    |   |                    |                    |                    |                    |       |     |                                        |
|--------------------------------------------------------------------------------------------------------------------|---|--------------------|--------------------|--------------------|--------------------|-------|-----|----------------------------------------|
| KEGG_DRUG_METABOLISM_OTHER_ENZYMES                                                                                 | 6 | -<br>0.689<br>441  | -<br>1.365<br>1545 | 0.023<br>2558<br>1 | 0.047<br>9714<br>4 | 0.397 | 657 | tags=100%,<br>list=31%,<br>signal=145% |
| REACTOME_REGULATION_OF_PLK1_ACTIVITY_AT_G2_M_TRANSITION                                                            | 5 | -<br>0.705<br>3486 | -<br>1.344<br>8312 | 0.023<br>2558<br>1 | 0.058<br>0729<br>6 | 0.474 | 623 | tags=100%,<br>list=30%,<br>signal=142% |
| REACTOME_MET_ACTIVATES_PTK2_SIGNALING                                                                              | 6 | -<br>0.641<br>6627 | -<br>1.264<br>17   | 0.023<br>8095<br>2 | 0.098<br>8350<br>9 | 0.763 | 757 | tags=100%,<br>list=36%,<br>signal=156% |
| REACTOME_LAMININ_INTERACTIONS                                                                                      | 6 | -<br>0.690<br>8743 | -<br>1.321<br>0305 | 0.025<br>1953<br>2 | 0.070<br>1953<br>2 | 0.571 | 654 | tags=100%,<br>list=31%,<br>signal=145% |
| MIR1227_5P                                                                                                         | 5 | -<br>0.698<br>1853 | -<br>1.292<br>5441 | 0.025<br>6410<br>3 | 0.161<br>4305<br>7 | 0.624 | 638 | tags=100%,<br>list=30%,<br>signal=143% |
| MIR1233_5P                                                                                                         | 6 | -<br>0.622<br>0736 | -<br>1.196<br>1564 | 0.027<br>0270<br>3 | 0.294<br>8265<br>7 | 0.905 | 798 | tags=100%,<br>list=38%,<br>signal=161% |
| WP_KYNURENE_PATHWAY_AND_LINKS_TO_CELL_SENESCENCE                                                                   | 6 | -<br>0.692<br>7855 | -<br>1.322<br>9927 | 0.028<br>5714<br>3 | 0.069<br>4283<br>8 | 0.564 | 650 | tags=100%,<br>list=31%,<br>signal=144% |
| KANNAN_TP53_TARGETS_UP                                                                                             | 6 | -<br>0.628<br>2848 | -<br>1.260<br>2175 | 0.029<br>4117<br>7 | 0.100<br>4469<br>7 | 0.772 | 785 | tags=100%,<br>list=37%,<br>signal=159% |
| BERNARD_PPAPDC1B_TARGETS_DN                                                                                        | 6 | -<br>0.606<br>7845 | -<br>1.242<br>0918 | 0.031<br>25<br>9   | 0.111<br>5028<br>9 | 0.824 | 830 | tags=100%,<br>list=40%,<br>signal=165% |
| PID_HIF1_TF_PATHWAY                                                                                                | 6 | -<br>0.703<br>2967 | -<br>1.380<br>3883 | 0.033<br>3333<br>4 | 0.042<br>8521<br>9 | 0.356 | 628 | tags=100%,<br>list=30%,<br>signal=142% |
| MIR6801_5P                                                                                                         | 6 | -<br>0.722<br>4081 | -<br>1.363<br>5545 | 0.033<br>3333<br>4 | 0.086<br>7038<br>2 | 0.378 | 588 | tags=100%,<br>list=28%,<br>signal=139% |
| WACKER_HYPOXIA_TARGETS_OF_VHL                                                                                      | 5 | -<br>0.695<br>32   | -<br>1.307<br>539  | 0.033<br>8983<br>1 | 0.078<br>1346<br>6 | 0.614 | 644 | tags=100%,<br>list=31%,<br>signal=144% |
| SCHAEFFER_PROSTATE_DEVELOPMENT_12HR_DN                                                                             | 6 | -<br>0.658<br>8629 | -<br>1.299<br>7173 | 0.034<br>4827<br>6 | 0.078<br>5067<br>5 | 0.637 | 721 | tags=100%,<br>list=34%,<br>signal=152% |
| MIR6778_5P                                                                                                         | 6 | -<br>0.622<br>0736 | -<br>1.198<br>5798 | 0.035<br>7142<br>9 | 0.289<br>7816<br>3 | 0.9   | 798 | tags=100%,<br>list=38%,<br>signal=161% |
| REACTOME_APC_C_CDH1_MEDIATED_DEGRADATION_OF_CD_C20_AND_OTHER_APC_C_CDH1_TARGETED_PROTEINS_IN_LATE_MITOSIS_EARLY_G1 | 5 | -<br>0.705<br>3486 | -<br>1.327<br>4994 | 0.036<br>3636<br>4 | 0.067<br>3969<br>5 | 0.548 | 623 | tags=100%,<br>list=30%,<br>signal=142% |
| ONO_FOXP3_TARGETS_DN                                                                                               | 5 | -<br>0.717<br>765  | -<br>1.310<br>8405 | 0.037<br>0370<br>4 | 0.076<br>3878<br>5 | 0.603 | 597 | tags=100%,<br>list=28%,<br>signal=139% |
| MIR4329                                                                                                            | 6 | -<br>0.641<br>1849 | -<br>1.252<br>6447 | 0.037<br>0370<br>4 | 0.214<br>6326<br>8 | 0.761 | 758 | tags=100%,<br>list=36%,<br>signal=156% |
| MIR2682_5P                                                                                                         | 6 | -<br>0.650<br>7406 | -<br>1.236<br>4334 | 0.037<br>0370<br>4 | 0.240<br>6354<br>7 | 0.801 | 738 | tags=100%,<br>list=35%,<br>signal=154% |
| PID_SYNDICAN_4_PATHWAY                                                                                             | 5 | -<br>0.760<br>2674 | -<br>1.391<br>3044 | 0.038<br>4615<br>4 | 0.038<br>6024<br>1 | 0.319 | 508 | tags=100%,<br>list=24%,<br>signal=132% |
| CUI_GLUCOSE_DEPRIVATION                                                                                            | 6 | -<br>0.672<br>2408 | -<br>1.274<br>3232 | 0.038<br>4615<br>4 | 0.092<br>0063<br>6 | 0.721 | 693 | tags=100%,<br>list=33%,<br>signal=149% |
| WP_PATHOGENESIS_OF_SARSCOV2_MEDIATED_BY_NSP9_NSP10_COMPLEX                                                         | 5 | -<br>0.672<br>8749 | -<br>1.270<br>1396 | 0.038<br>4615<br>4 | 0.094<br>6614<br>4 | 0.736 | 691 | tags=100%,<br>list=33%,<br>signal=149% |
| KYNG_WERNER_SYNDROME_AND_NORMAL_AGING_DN                                                                           | 5 | -<br>0.661<br>4136 | -<br>1.231<br>7427 | 0.038<br>4615<br>4 | 0.119<br>7950<br>8 | 0.846 | 715 | tags=100%,<br>list=34%,<br>signal=151% |
| PID_DELTA_NP63_PATHWAY                                                                                             | 6 | -<br>0.668<br>8963 | -<br>1.303<br>3925 | 0.04<br>1588<br>3  | 0.078<br>1588<br>3 | 0.624 | 700 | tags=100%,<br>list=33%,<br>signal=150% |
| SHIPP_DLCL_VS_FOLLICULAR_LYMPHOMA_UP                                                                               | 6 | -<br>0.627<br>807  | -<br>1.253<br>0994 | 0.04<br>7028<br>6  | 0.103<br>7028<br>6 | 0.791 | 786 | tags=100%,<br>list=37%,<br>signal=159% |
| BIOCARTA_CELL_CYCLE_PATHWAY                                                                                        | 6 | -<br>0.655<br>5184 | -<br>1.234<br>1237 | 0.04<br>6766<br>2  | 0.117<br>6766<br>2 | 0.84  | 728 | tags=100%,<br>list=35%,<br>signal=153% |
| MIR92A_1_5P                                                                                                        | 5 | -<br>0.686<br>2464 | -<br>1.277<br>2425 | 0.04<br>5049<br>6  | 0.177<br>5049<br>6 | 0.684 | 663 | tags=100%,<br>list=32%,<br>signal=146% |

|                                            |   |                    |                    |                    |                    |       |     |                                        |
|--------------------------------------------|---|--------------------|--------------------|--------------------|--------------------|-------|-----|----------------------------------------|
| WP_LUNG_FIBROSIS                           | 6 | -<br>0.692<br>7855 | -<br>1.301<br>0806 | 0.041<br>6666<br>7 | 0.078<br>7735<br>7 | 0.635 | 650 | tags=100%,<br>list=31%,<br>signal=144% |
| AMIT_EGF_RESPONSE_240_MCF10A               | 5 | -<br>0.697<br>7077 | -<br>1.292<br>4579 | 0.042<br>5531<br>9 | 0.082<br>3817<br>6 | 0.665 | 639 | tags=100%,<br>list=30%,<br>signal=143% |
| MIR3161                                    | 5 | -<br>0.649<br>4747 | -<br>1.237<br>2252 | 0.042<br>5531<br>9 | 0.241<br>4184<br>4 | 0.799 | 740 | tags=100%,<br>list=35%,<br>signal=154% |
| MIR601                                     | 5 | -<br>0.693<br>8873 | -<br>1.273<br>8569 | 0.043<br>4782<br>6 | 0.182<br>9004<br>1 | 0.699 | 647 | tags=100%,<br>list=31%,<br>signal=144% |
| REACTOME_METABOLISM_OF_NUCLEOTIDES         | 7 | -<br>0.725<br>1434 | -<br>1.432<br>8524 | 0.045<br>4545<br>5 | 0.024<br>3662<br>5 | 0.199 | 583 | tags=100%,<br>list=28%,<br>signal=138% |
| BERENJENO_ROCK_SIGNALING_NOT_VIA_RHOA_UP   | 5 | -<br>0.736<br>3897 | -<br>1.360<br>0837 | 0.046<br>1538<br>5 | 0.050<br>8206<br>5 | 0.422 | 558 | tags=100%,<br>list=27%,<br>signal=136% |
| REACTOME_ER_TO_GOLGI_ANTEROGRADE_TRANSPORT | 5 | -<br>0.784<br>1452 | -<br>1.417<br>6489 | 0.046<br>5116<br>3 | 0.029<br>8511<br>1 | 0.241 | 458 | tags=100%,<br>list=22%,<br>signal=128% |
| BAE_BRCA1_TARGETS_UP                       | 5 | -<br>0.712<br>0344 | -<br>1.304<br>7274 | 0.046<br>5116<br>3 | 0.078<br>0824<br>9 | 0.62  | 609 | tags=100%,<br>list=29%,<br>signal=141% |
| MIR3929                                    | 6 | -<br>0.698<br>0411 | -<br>1.331<br>3403 | 0.048<br>7804<br>9 | 0.116<br>5373<br>3 | 0.482 | 639 | tags=100%,<br>list=30%,<br>signal=143% |

Supplementary Table 3: An examination of the differential expression ( $p < 0.05$  and  $|FC| > 2$ ) between the control HRTPT cells and those exposed to 4.5 $\mu$ M iAs for 3, 8, and 10 passages identified 247, 363, and 304 genes, respectively.

| Control vs P3   | Control vs P8   | Control vs P10  | CntP3,CntP8,CntP10 |
|-----------------|-----------------|-----------------|--------------------|
| 247 Total Genes | 363 Total Genes | 304 Total Genes | 167 Total Genes    |
| Down (106)      | Down (118)      | Down (111)      | Down (76)          |
| ACPP            | ACPP            | ACPP            | ACPP               |
| ACSL1           | ACSL1           | ACSL1           | ACSL1              |
| ACSM3           | ACSM3           | ADAMTSL3        | ADAMTSL3           |
| ADAMTSL3        | ADAMTSL3        | ARHGAP24        | ARHGAP24           |
| ARHGAP24        | ARHGAP24        | ARHGEF38        | ARHGEF38           |
| ARHGEF38        | ARHGEF38        | ATP6V1B1        | ATP6V1B1           |
| ATPIA1          | ATP6V1B1        | B3GALT5         | B3GALT5            |
| ATP1B1          | B3GALT5         | BCAM            | BCAM               |
| ATP6V1B1        | BCAM            | BIVM            | BIVM               |
| B3GALT5         | BIVM            | CCDC84          | CCDC84             |
| BCAM            | CCDC84          | CCNL2           | CCNL2              |
| BCKDHB          | CCNL2           | CDH16           | CLCN5              |
| BIVM            | CDH16           | CLCN5           | CLDN16             |
| CBS             | CLCN5           | CLDN16          | CREB5              |
| CCDC84          | CLDN16          | CPVL            | CRNDE              |
| CCNL2           | CPVL            | CREB5           | CYFIP2             |
| CLCN5           | CREB5           | CRIM1           | DAB2               |
| CLDN16          | CRNDE           | CRNDE           | DMTF1              |
| CREB5           | CYFIP2          | CYFIP2          | EFHD1              |
| CREG1           | DAB2            | DAB2            | EMX2               |
| CRNDE           | DBI             | DMTF1           | EPB41L1            |
| CYFIP2          | DMTF1           | EDIL3           | ERBB4              |
| DAB2            | EDIL3           | EFHD1           | ESRRG              |
| DEPTOR          | EFHD1           | EMP1            | FABP3              |
| DMTF1           | EMX2            | EMX2            | FGF13              |
| EFHD1           | EPB41L1         | EPB41L1         | FGF9               |
| EMX2            | ERBB4           | ERBB4           | FGFR2              |
| EPB41L1         | ESRP1           | ESRP1           | FRMD4A             |
| ERBB4           | ESRRG           | ESRRG           | FYB                |
| ESRRG           | FABP3           | FABP3           | GPNMB              |
| FABP3           | FGF13           | FGF13           | GUSBP3             |
| FGF13           | FGF9            | FGF9            | HOXA6              |
| FGF9            | FGFR2           | FGFR2           | KCNJ1              |
| FGFR2           | FKSG51          | FRMD4A          | KCP                |
| FRMD4A          | FKSG56          | FYB             | LDOC1              |
| FYB             | FKSG59          | GAS5            | LENG8              |
| GOT1            | FKSG61          | GPNMB           | LIX1               |

|          |          |          |          |
|----------|----------|----------|----------|
| GPNUMB   | FKSG63   | GTF2IP20 | LRP6     |
| GUSBP3   | FRMD4A   | GUSBP2   | MAN1A1   |
| HOXA10   | FYB      | GUSBP3   | MAOA     |
| HOXA6    | GLS      | GUSBP9   | MEAF6P1  |
| HPSE     | GPNUMB   | HERC2P9  | NBPF1    |
| IVNS1ABP | GTF2IP20 | HOXA6    | NEAT1    |
| KCNJ1    | GUSBP2   | HOXB3    | NPIPL3   |
| KCP      | GUSBP3   | KCNJ1    | NREP     |
| LDOC1    | GUSBP3   | KCP      | OGT      |
| LENG8    | GUSBP9   | LDOC1    | PDZK1    |
| LIX1     | HERC2P9  | LENG8    | PILRB    |
| LRP6     | HOXA6    | LIX1     | POU3F3   |
| LUC7L3   | IVNS1ABP | LRP6     | PPARGC1A |
| MAN1A1   | KCNJ1    | LUC7L3   | PTH1R    |
| MAOA     | KCP      | MAN1A1   | RAB17    |
| MEAF6P1  | LDOC1    | MAOA     | RAP1GAP  |
| MECOM    | LENG8    | MEAF6P1  | SCD5     |
| METTL7A  | LIX1     | NBPF1    | SEMA4A   |
| MPC2     | LRP6     | NBPF12   | SLC12A1  |
| NBPF1    | MAN1A1   | NBPF14   | SLC3A1   |
| NEAT1    | MAOA     | NEAT1    | SLC4A4   |
| NPIPL3   | MEAF6P1  | NKTR     | SLC6A13  |
| NREP     | MECOM    | NMNAT2   | SLCO4C1  |
| OCLN     | METTL7A  | NPIPA5   | SMA4     |
| OGT      | NBPF1    | NPIP11   | SMG1P1   |
| PDZK1    | NBPF12   | NPIPB3   | SMG1P5   |
| PILRB    | NBPF14   | NPIPB4   | SNORD41  |
| POU3F3   | NEAT1    | NPIPB5   | SOSTDC1  |
| PPARGC1A | NMNAT2   | NPIPB6   | SPTLC3   |
| PROM1    | NPIPA5   | NPIPB8   | SRSF5    |
| PTH1R    | NPIP11   | NPIPL3   | STAG3L1  |
| PTPN4    | NPIPB3   | NREP     | STAG3L2  |
| RAB17    | NPIPB4   | OGT      | STAG3L3  |
| RAP1GAP  | NPIPB5   | P3H2     | TIA1     |
| RBM47    | NPIPB6   | PAQR5    | TMEM37   |
| RBM5     | NPIPB8   | PDZK1    | UGT8     |
| SCD5     | NPIPL3   | PHLDA1   | VAV3     |
| SEMA4A   | NREP     | PILRB    | VEPH1    |
| SIAE     | OGT      | PKP4     | WSB1     |
| SIM2     | P3H2     | PMS2P3   |          |
| SLC12A1  | PAQR5    | POU3F3   | Up (91)  |
| SLC3A1   | PDZK1    | PPARGC1A | AKAP12   |
| SLC4A4   | PILRB    | PTH1R    | ARK1C1   |

|          |          |          |          |
|----------|----------|----------|----------|
| SLC6A13  | PKP4     | QKI      | AKR1C3   |
| SLC04C1  | PMS2P3   | QPCT     | AMIGO2   |
| SMA4     | POU3F3   | RAB17    | C3       |
| SMG1P1   | PPARGC1A | RAP1GAP  | CALB1    |
| SMG1P5   | PROM1    | S100A2   | CCDC146  |
| SNORD13  | PTH1R    | SCD5     | CCL20    |
| SNORD24  | PTPN4    | SEMA4A   | CD55     |
| SNORD41  | QPCT     | SLC12A1  | CDH6     |
| SOSTDC1  | RAB17    | SLC3A1   | CDKN1A   |
| SPTLC3   | RAP1GAP  | SLC4A4   | CEACAM1  |
| SRSF5    | RBM5     | SLC6A13  | CEACAM5  |
| STAG3L1  | S100A2   | SLC04C1  | CFB      |
| STAG3L2  | SCD5     | SMA4     | CHST15   |
| STAG3L3  | SCIN     | SMG1P1   | CLEC4E   |
| SUCLG1   | SEMA4A   | SMG1P2   | CP       |
| TCP11L2  | SIAE     | SMG1P5   | CSF1     |
| TIA1     | SLC12A1  | SNORD41  | CTSE     |
| TMEM171  | SLC3A1   | SOSTDC1  | CXCL1    |
| TMEM37   | SLC4A4   | SPTLC3   | CXCL3    |
| TMEM47   | SLC6A13  | SRSF5    | CXCL8    |
| UBA1     | SLC04C1  | STAG3L1  | DUSP1    |
| UGT8     | SMA4     | STAG3L2  | DUSP4    |
| VAV3     | SMG1P1   | STAG3L3  | DUSP5    |
| VEGFA    | SMG1P2   | SYTL2    | EPS8     |
| VEPH1    | SMG1P5   | TIA1     | ERRFI1   |
| WSB1     | SNORD41  | TMEM171  | F3       |
|          | SOSTDC1  | TMEM37   | FAM83D   |
| Up (141) | SPTLC3   | UGT8     | FGF18    |
| ACOT7    | SRSF5    | VAV3     | FGFBP1   |
| AKR1C1   | STAG3L1  | VEPH1    | FHL2     |
| AKAP12   | STAG3L2  | WSB1     | GCNT3    |
| AKR1C3   | STAG3L3  |          | GDA      |
| ALAS1    | SYTL2    | Up (193) | GPRC5A   |
| AMIGO2   | TIA1     | ACTB     | HLA-DMA  |
| C3       | TMEM37   | ADAM9    | HMOX1    |
| CALB1    | UGT8     | AKAP12   | IFI6     |
| CCDC146  | VAV3     | AKR1C1   | IL18     |
| CCL20    | VEPH1    | AKR1C3   | IL32     |
| CCND1    | WSB1     | AMIGO2   | IL6      |
| CCND3    |          | ANLN     | ITGB3    |
| CD44     | Up (245) | ARHGAP1  | KLK10    |
| CD55     | ACOT7    | ASRGL1   | KRT18P24 |
| CD68     | ACTB     | ATP2B4   | LCN2     |

|         |         |         |          |
|---------|---------|---------|----------|
| CDH6    | ADAM9   | BMP1    | LGALS1   |
| CDKN1A  | AKAP12  | C3      | LPCAT1   |
| CEACAM1 | AKR1C1  | CALB1   | LYPD1    |
| CEACAM5 | AKR1C3  | CALM1   | MALL     |
| CES3    | ALAS1   | CCDC146 | MAP1B    |
| CFB     | AMIGO2  | CCL20   | MFAP5    |
| CHST15  | ANLN    | CD55    | MFGE8    |
| CLEC4E  | APOL1   | CD68    | MUC13    |
| CLU     | APOL2   | CD74    | MX1      |
| CP      | ASRGL1  | CDH6    | NNMT     |
| CSF1    | ATP2B4  | CDKN1A  | NRCAM    |
| CTSE    | BMP1    | CEACAM1 | PCDH1    |
| CXCL1   | C3      | CEACAM5 | PDZK1IP1 |
| CXCL3   | CALB1   | CFB     | PERP     |
| CXCL8   | CALM1   | CHST15  | PIK3AP1  |
| DCBLD2  | CCDC146 | CKMT1A  | PLEC     |
| DUSP1   | CCL20   | CLDN1   | PLK2     |
| DUSP4   | CCND1   | CLDN10  | PPBP     |
| DUSP5   | CD44    | CLEC4E  | PTHLH    |
| EMP3    | CD55    | CMPK1   | PTPRU    |
| EPHA2   | CD74    | CNN2    | PYGO1    |
| EPS8    | CDH6    | CP      | RARRES3  |
| ERRFI1  | CDKN1A  | CSF1    | RXFP1    |
| F3      | CEACAM1 | CTSB    | SAA1     |
| FAM83D  | CEACAM5 | CTSE    | SAA2     |
| FGF18   | CFB     | CXCL1   | SH2D1B   |
| FGFBP1  | CHST15  | CXCL3   | SH3BGRL2 |
| FHL2    | CKMT1A  | CXCL8   | SLC16A3  |
| FTL     | CLDN1   | CYB5R3  | SLC1A1   |
| GCNT3   | CLDN10  | CYP4V2  | SLC7A11  |
| GDA     | CLEC4E  | DEGS1   | SLC7A7   |
| GPRC5A  | CNN2    | DSG2    | SLC9A3R1 |
| HLA-DMA | CP      | DUSP1   | SLPI     |
| HMGA1   | CSF1    | DUSP4   | TFPI2    |
| HMOX1   | CTSB    | DUSP5   | TGM2     |
| HPGD    | CTSE    | EPHX1   | TMOD1    |
| IFI6    | CXCL1   | EPS8    | TNFAIP3  |
| IL18    | CXCL3   | ERO1A   | TRIM16L  |
| IL32    | CXCL8   | ERRFI1  | TRIM22   |
| IL6     | CYB5R3  | ETHE1   | TSTA3    |
| ITGA3   | DCBLD2  | F3      | TTC9     |
| ITGB3   | DEGS1   | FAM83D  | TXNRD1   |
| KDELR3  | DNAJB1  | FGF18   | UCA1     |



|          |            |            |        |
|----------|------------|------------|--------|
| KLK10    | DSG2       | FGFBP1     | UGT1A1 |
| KRT18    | DUSP1      | FHL2       | WNT7A  |
| KRT18P24 | DUSP4      | GABARAPL1  | ZNF486 |
| LAMA3    | DUSP5      | GBP2       |        |
| LCN2     | EPHA2      | GCNT3      |        |
| LGALS1   | EPHX1      | GDA        |        |
| LPCAT1   | EPS8       | GPR143     |        |
| LRRC8A   | ERO1A      | GPRC5A     |        |
| LRRN4    | ERRFI1     | GPX3       |        |
| LYPD1    | ETHE1      | GSR        |        |
| MALL     | F3         | H2BFS      |        |
| MAP1B    | FAM129B    | HABP2      |        |
| MFAP5    | FAM83D     | HIST1H1B   |        |
| MFGE8    | FGF18      | HIST1H2AI  |        |
| MUC13    | FGFBP1     | HIST1H2BK  |        |
| MX1      | FHL2       | HIST2H2AA3 |        |
| NNMT     | FSCN1      | HIST2H2AA4 |        |
| NRCAM    | GABARAPL1  | HIST2H2BB  |        |
| NT5E     | GBP2       | HIST2H2BF  |        |
| PCDH1    | GCNT3      | HLA-DMA    |        |
| PDZK1IP1 | GDA        | HLA-DRA    |        |
| PERP     | GPR143     | HLA-DRB1   |        |
| PIK3AP1  | GPRC5A     | HMOX1      |        |
| PLEC     | H2AFZ      | HN1        |        |
| PLK2     | H2BFS      | IFI6       |        |
| PPBP     | HIST1H1B   | IGFBP3     |        |
| PTHLH    | HIST1H2AI  | IL18       |        |
| PTPRU    | HIST1H2BK  | IL1R1      |        |
| PYGO1    | HIST2H2AA3 | IL32       |        |
| RARRES3  | HIST2H2AA4 | IL6        |        |
| RNA5S1   | HIST2H2BB  | ITGB3      |        |
| RNA5S10  | HIST2H2BF  | KLK10      |        |
| RNA5S11  | HLA-DMA    | KPNA2      |        |
| RNA5S12  | HLA-DRA    | KRT18P24   |        |
| RNA5S13  | HLA-DRB1   | LAMB3      |        |
| RNA5S14  | HM13       | LCN2       |        |
| RNA5S15  | HMOX1      | LGALS1     |        |
| RNA5S16  | HN1        | LIPH       |        |
| RNA5S17  | HPGD       | LPCAT1     |        |
| RNA5S2   | ICAM1      | LRRC59     |        |
| RNA5S3   | IFI6       | LYPD1      |        |
| RNA5S4   | IGFBP3     | MALL       |        |
| RNA5S6   | IL18       | MAP1B      |        |

|          |          |          |
|----------|----------|----------|
| RNA5S7   | IL1R1    | MAP1LC3B |
| RNA5S9   | IL32     | MFAP5    |
| RUNX2    | IL6      | MFGE8    |
| RXFP1    | ITGA3    | MFHAS1   |
| S100A16  | ITGB3    | MGAT5    |
| SAA1     | KDEL3    | MICAL2   |
| SAA2     | KLK10    | MTRNR2L9 |
| SAR1A    | KPNA2    | MTUS1    |
| SCEL     | KRT18    | MUC13    |
| SH2D1B   | KRT18P24 | MX1      |
| SH3BGRL2 | LAMA3    | MYADM    |
| SLC16A3  | LAMB3    | NEU1     |
| SLC1A1   | LAMC2    | NFKBIA   |
| SLC7A11  | LCN2     | NNMT     |
| SLC7A7   | LGALS1   | NRCAM    |
| SLC9A3R1 | LIPH     | ODC1     |
| SLPI     | LPCAT1   | PCDH1    |
| SPON1    | LRRC59   | PDP1     |
| SQRDL    | LRRC8A   | PDZD2    |
| SRM      | LRRN4    | PDZK1IP1 |
| STEAP3   | LYPD1    | PERP     |
| TCEB1    | MALL     | PIK3AP1  |
| TFPI2    | MAP1B    | PLEC     |
| TGFBR2   | MFAP5    | PLK1     |
| TGM2     | MFGE8    | PLK2     |
| TM4SF4   | MFHAS1   | PLLP     |
| TMEM184B | MGAT5    | PLPP2    |
| TMOD1    | MICAL2   | PML      |
| TNFAIP3  | MMP14    | POR      |
| TNFRSF21 | MTUS1    | PORCN    |
| TRIM16L  | MUC13    | PPBP     |
| TRIM22   | MX1      | PPP1R3B  |
| TSTA3    | MYADM    | PRKAR1A  |
| TTC9     | NET1     | PRSS8    |
| TXNRD1   | NFKBIA   | PSAT1    |
| U2       | NNMT     | PTHLH    |
| UCA1     | NRCAM    | PTPRU    |
| UGT1A1   | NT5E     | PYGO1    |
| WNT7A    | ODC1     | QSOX1    |
| ZNF486   | PCDH1    | RARRES3  |
|          | PDLIM1   | RDH10    |
|          | PDP1     | RIMKLB   |
|          | PDZD2    | RIPK2    |

|          |            |
|----------|------------|
| PDZK1IP1 | RNF144B    |
| PERP     | RXFP1      |
| PIK3AP1  | SAA1       |
| PLEC     | SAA2       |
| PLK1     | SAT1       |
| PLK2     | SERPINB1   |
| PLLP     | SH2D1B     |
| PLPP2    | SH3BGRL2   |
| PML      | SHROOM3    |
| POR      | SIK2       |
| PORCN    | SLC15A1    |
| PPBP     | SLC16A3    |
| PPP1R3B  | SLC1A1     |
| PRKAG2   | SLC20A2    |
| PRNP     | SLC2A1     |
| PRSS8    | SLC37A1    |
| PSAT1    | SLC4A11    |
| PTHLH    | SLC6A20    |
| PTPRU    | SLC7A11    |
| PVRL2    | SLC7A7     |
| PYGO1    | SLC9A3R1   |
| QSOX1    | SLPI       |
| RARRES3  | SNX2       |
| RHOC     | SOD2       |
| RHOF     | SRD5A3     |
| RIMKLB   | ST6GALNAC1 |
| RIPK2    | SULT1A4    |
| RNA5S1   | TFPI2      |
| RNA5S10  | TGM2       |
| RNA5S11  | TINAGL1    |
| RNA5S17  | TM2D2      |
| RNA5S2   | TM4SF4     |
| RNA5S3   | TMOD1      |
| RNA5S4   | TNFAIP3    |
| RNA5S6   | TNFSF10    |
| RNA5S7   | TPCN1      |
| RNF144B  | TPK1       |
| RUNX2    | TPM4       |
| RXFP1    | TRIM16L    |
| S100A16  | TRIM22     |
| SAA1     | TSKU       |
| SAA2     | TSPAN14    |
| SCEL     | TSTA3      |

|            |         |
|------------|---------|
| SERPINB1   | TTC9    |
| SFN        | TUBB3   |
| SH2D1B     | TXNDC12 |
| SH3BGRL2   | TXNRD1  |
| SH3BGRL3   | UCA1    |
| SHROOM3    | UCP2    |
| SIK2       | UGT1A1  |
| SLC15A1    | UNC93B1 |
| SLC16A3    | WNT7A   |
| SLC1A1     | XBP1    |
| SLC20A2    | ZNF486  |
| SLC2A1     |         |
| SLC37A1    |         |
| SLC39A6    |         |
| SLC4A11    |         |
| SLC6A20    |         |
| SLC7A11    |         |
| SLC7A7     |         |
| SLC9A3R1   |         |
| SLPI       |         |
| SLX1A      |         |
| SOD2       |         |
| SORBS2     |         |
| SPON1      |         |
| SQRDL      |         |
| SRD5A3     |         |
| SRM        |         |
| ST6GALNAC1 |         |
| STEAP3     |         |
| SULT1A4    |         |
| TAGLN2     |         |
| TALDO1     |         |
| TCEB1      |         |
| TFPI2      |         |
| TGFBR2     |         |
| TGM2       |         |
| THBS1      |         |
| TINAGL1    |         |
| TM2D2      |         |
| TMEM184B   |         |
| TMEM63B    |         |
| TMOD1      |         |
| TNFAIP3    |         |

|          |
|----------|
| TNFRSF21 |
| TNFSF10  |
| TPCN1    |
| TPK1     |
| TPM4     |
| TPRA1    |
| TRAM2    |
| TRIM16L  |
| TRIM22   |
| TSKU     |
| TSPAN14  |
| TSTA3    |
| TTC9     |
| TUBA1C   |
| TUBB3    |
| TUBB4B   |
| TXN      |
| TXNDC12  |
| TXNRD1   |
| UCA1     |
| UCP2     |
| UGT1A1   |
| UNC93B1  |
| WARS     |
| WNT7A    |
| XBP1     |
| ZDHHC9   |
| ZNF486   |

Supplementary Table 4: Differential gene expression analysis between all HRTPT cells exposed to iAs passage (i.e., combined P3, P8, P10) and control.

| probe               | FC_iAs+VSctrl | log2(FC) | raw.pval | -LOG(p) | Gene Symbol            |
|---------------------|---------------|----------|----------|---------|------------------------|
| TC1500010739.hg.1   | 0.0064075     | -7.286   | 8.02E-15 | 14.096  | SLC12A1                |
| TC1100012786.hg.1   | 0.0215        | -5.5395  | 1.21E-14 | 13.918  | KCNJ1                  |
| TC0800007715.hg.1   | 0.037656      | -4.731   | 4.20E-13 | 12.377  |                        |
| TC0300007273.hg.1   | 0.16649       | -2.5865  | 9.25E-13 | 12.034  | PTH1R                  |
| TC0100017310.hg.1   | 0.12226       | -3.032   | 2.93E-12 | 11.534  | ESRRG                  |
| TC0400011180.hg.1   | 0.11507       | -3.1194  | 8.33E-12 | 11.08   | SCD5                   |
| TC1400007562.hg.1   | 0.47681       | -1.0685  | 8.38E-12 | 11.077  | SRSF5                  |
| TC0300009853.hg.1   | 0.080953      | -3.6268  | 1.10E-10 | 9.9573  | CLDN16                 |
| TC0100015586.hg.1   | 0.37288       | -1.4232  | 2.25E-10 | 9.6481  | PDZK1                  |
| TC0700013623.hg.1   | 0.19783       | -2.3377  | 2.78E-10 | 9.5565  | KCP                    |
| TC1900008860.hg.1   | 0.36077       | -1.4708  | 8.17E-10 | 9.0879  | LENG8                  |
| TC0100015155.hg.1   | 0.22889       | -2.1272  | 1.07E-09 | 8.9697  | VAV3                   |
| TC1900008286.hg.1   | 0.28588       | -1.8065  | 1.59E-09 | 8.798   | BCAM                   |
| TC0400012829.hg.1   | 0.35883       | -1.4786  | 2.01E-09 | 8.6962  | ARHGEF38               |
| TC0700013575.hg.1   | 0.37298       | -1.4228  | 2.39E-09 | 8.6222  | STAG3L3                |
| TC1300008095.hg.1   | 0.31838       | -1.6512  | 4.02E-09 | 8.3957  |                        |
| TC1500010618.hg.1   | 0.22758       | -2.1356  | 4.12E-09 | 8.3855  |                        |
| TC0700013427.hg.1   | 0.21249       | -2.2345  | 5.02E-09 | 8.2993  | STAG3L5P-PVRIG2P-PILRB |
| TC1600010375.hg.1   | 0.39119       | -1.3541  | 5.99E-09 | 8.2225  | CRNDE                  |
| TC1600010602.hg.1   | 0.48616       | -1.0405  | 7.41E-09 | 8.1301  | CDH16                  |
| TC1200008675.hg.1   | 2.8042        | 1.4876   | 9.39E-09 | 8.0272  | TXNRD1                 |
| TC0100010155.hg.1   | 0.14946       | -2.7422  | 1.30E-08 | 7.8871  | SEMA4A                 |
| TC0700013428.hg.1   | 0.25301       | -1.9827  | 1.47E-08 | 7.8336  | STAG3L5P               |
| TC0700011519.hg.1   | 0.39518       | -1.3394  | 1.47E-08 | 7.8319  | STAG3L2                |
| TC0500011528.hg.1   | 0.1398        | -2.8386  | 1.64E-08 | 7.785   | LIX1                   |
| TC0X00010989.hg.1   | 0.34424       | -1.5385  | 1.94E-08 | 7.713   | LDOC1                  |
| TC0700013388.hg.1   | 0.37325       | -1.4218  | 2.13E-08 | 7.6707  | STAG3L1                |
| TC0400012621.hg.1   | 0.35525       | -1.4931  | 2.86E-08 | 7.5437  | ACSL1                  |
| TC0200013750.hg.1   | 2.6575        | 1.41     | 3.10E-08 | 7.5084  | FHL2                   |
| TC0800010002.hg.1   | 3.2173        | 1.6858   | 3.37E-08 | 7.4718  | DUSP4                  |
| TC1700010994.hg.1   | 0.27383       | -1.8687  | 3.57E-08 | 7.4469  |                        |
| TC2000009216.hg.1   | 5.897         | 2.56     | 4.25E-08 | 7.3711  | SLPI                   |
| TC0600013326.hg.1   | 2.6285        | 1.3943   | 4.37E-08 | 7.3597  | PERP                   |
| TC0300006925.hg.1   | 2.0059        | 1.0042   | 5.44E-08 | 7.2641  | TGFBR2                 |
| HTA2_pos.2985914_st | 0.22603       | -2.1454  | 5.53E-08 | 7.2572  |                        |
| TC0100011406.hg.1   | 2.6491        | 1.4055   | 5.78E-08 | 7.2383  | CD55                   |
| TC1300008096.hg.1   | 0.27946       | -1.8393  | 8.59E-08 | 7.0659  |                        |

|                                     |         |         |          |        |          |
|-------------------------------------|---------|---------|----------|--------|----------|
| TC0700010348.hg.1                   | 0.20176 | -2.3093 | 8.86E-08 | 7.0528 | SOSTDC1  |
| TC0100013445.hg.1                   | 5.1539  | 2.3657  | 1.08E-07 | 6.9678 | IFI6     |
| TC0600007847.hg.1                   | 2.739   | 1.4536  | 1.13E-07 | 6.9453 | CDKN1A   |
| TC2100006465.hg.1                   | 0.31492 | -1.667  | 1.29E-07 | 6.8892 |          |
| TC2100006481.hg.1                   | 0.31492 | -1.667  | 1.29E-07 | 6.8892 |          |
| TC22_KI270733v1_random00006438.hg.1 | 0.31492 | -1.667  | 1.29E-07 | 6.8892 |          |
| TCUn_GL000220v100006438.hg.1        | 0.31492 | -1.667  | 1.29E-07 | 6.8892 |          |
| TC1200007626.hg.1                   | 0.42933 | -1.2198 | 1.42E-07 | 6.8476 | METTL7A  |
| TC1200012859.hg.1                   | 2.0255  | 1.0183  | 1.56E-07 | 6.8072 | RHOF     |
| TC1700007319.hg.1                   | 0.3556  | -1.4917 | 2.27E-07 | 6.6448 | WSB1     |
| TC1200009547.hg.1                   | 0.3495  | -1.5166 | 2.52E-07 | 6.5991 | SLC6A13  |
| TC1300008013.hg.1                   | 0.34007 | -1.5561 | 2.86E-07 | 6.5431 |          |
| TC0200011107.hg.1                   | 0.3777  | -1.4047 | 3.98E-07 | 6.3996 | EFHD1    |
| TC2000006736.hg.1                   | 0.33479 | -1.5787 | 4.25E-07 | 6.3712 | SPTLC3   |
| TC1000009025.hg.1                   | 0.16796 | -2.5738 | 4.44E-07 | 6.3525 | EMX2     |
| TC1200009834.hg.1                   | 82.547  | 6.3671  | 4.52E-07 | 6.3446 | MFAP5    |
| TC0500013317.hg.1                   | 0.32979 | -1.6004 | 5.91E-07 | 6.2283 | SMA4     |
| TC0700006913.hg.1                   | 0.12385 | -3.0133 | 6.17E-07 | 6.21   | GPNMB    |
| TC1600011514.hg.1                   | 0.42225 | -1.2438 | 6.19E-07 | 6.2082 | SMG1P2   |
| TC0100016694.hg.1                   | 0.47391 | -1.0773 | 6.35E-07 | 6.1972 | IVNS1ABP |
| TC1200008933.hg.1                   | 2.1813  | 1.1252  | 7.14E-07 | 6.1461 | TPCN1    |
| TC0200013926.hg.1                   | 0.41792 | -1.2587 | 8.26E-07 | 6.0831 |          |
| TC0200009067.hg.1                   | 0.26933 | -1.8925 | 9.21E-07 | 6.0356 | TMEM37   |
| TC1100011185.hg.1                   | 0.24793 | -2.012  | 1.05E-06 | 5.9794 |          |
| TC1700012274.hg.1                   | 2.8643  | 1.5182  | 1.06E-06 | 5.9762 | ITGB3    |
| TC0400010242.hg.1                   | 0.3018  | -1.7283 | 1.13E-06 | 5.9475 | PPARGC1A |
| TC0500011596.hg.1                   | 0.35447 | -1.4962 | 1.18E-06 | 5.9276 | SLC04C1  |
| TC0700006468.hg.1                   | 0.32396 | -1.6261 | 1.25E-06 | 5.9018 |          |
| TC0400011920.hg.1                   | 12.813  | 3.6795  | 1.38E-06 | 5.86   | SLC7A11  |
| TC0500009768.hg.1                   | 0.43435 | -1.2031 | 1.42E-06 | 5.8468 |          |
| TC0600009862.hg.1                   | 2.5179  | 1.3322  | 1.76E-06 | 5.7536 | AKAP12   |
| TC1500007409.hg.1                   | 25.34   | 4.6633  | 1.83E-06 | 5.7378 | GCNT3    |
| TC0200009756.hg.1                   | 0.45036 | -1.1508 | 1.88E-06 | 5.7254 | PKP4     |
| TC1600007205.hg.1                   | 0.36034 | -1.4726 | 2.25E-06 | 5.6469 |          |
| TC0600011173.hg.1                   | 0.43202 | -1.2108 | 2.47E-06 | 5.6068 | GUSBP2   |
| TC1700008867.hg.1                   | 2.641   | 1.4011  | 2.92E-06 | 5.5347 | SLC9A3R1 |
| TC1900007242.hg.1                   | 16.052  | 4.0047  | 3.38E-06 | 5.4714 | UCA1     |
| TC1000012428.hg.1                   | 2.3306  | 1.2207  | 3.82E-06 | 5.4182 | AKR1C3   |
| TC0500010835.hg.1                   | 2.8982  | 1.5352  | 3.85E-06 | 5.4141 | PLK2     |
| TC0500013318.hg.1                   | 0.41666 | -1.2631 | 4.00E-06 | 5.3977 | GUSBP3   |
| TC2100006467.hg.1                   | 0.31181 | -1.6813 | 4.36E-06 | 5.36   |          |

|                                     |         |         |            |        |           |
|-------------------------------------|---------|---------|------------|--------|-----------|
| TC22_Ki270733v1_random00006440.hg.1 | 0.31181 | -1.6813 | 4.36E-06   | 5.36   |           |
| TC1100013118.hg.1                   | 0.38537 | -1.3757 | 4.58E-06   | 5.3394 | LINC01001 |
| TC0300013417.hg.1                   | 2.0904  | 1.0638  | 5.13E-06   | 5.2897 | LIPH      |
| TC0200015616.hg.1                   | 0.29676 | -1.7526 | 6.29E-06   | 5.201  | ERBB4     |
| TC1100008018.hg.1                   | 0.26538 | -1.9139 | 6.78E-06   | 5.1685 | NEAT1     |
| TC0800012147.hg.1                   | 2.6226  | 1.391   | 7.16E-06   | 5.1452 | TSTA3     |
| TC1100008236.hg.1                   | 2.3218  | 1.2152  | 8.79E-06   | 5.0561 | CCND1     |
| TC0600010357.hg.1                   | 0.44927 | -1.1544 | 8.96E-06   | 5.0478 |           |
| TC0200007418.hg.1                   | 0.29073 | -1.7823 | 9.21E-06   | 5.0356 | SLC3A1    |
| TC1600011364.hg.1                   | 0.45411 | -1.1389 | 9.67E-06   | 5.0145 | NPIP85    |
| TC0500012842.hg.1                   | 3.6126  | 1.853   | 1.01E-05   | 4.9976 | DUSP1     |
| TC1200006896.hg.1                   | 2.6934  | 1.4294  | 1.02E-05   | 4.991  | GPRC5A    |
| TC0300010086.hg.1                   | 0.46327 | -1.1101 | 1.13E-05   | 4.9463 |           |
| TC0100017456.hg.1                   | 0.46728 | -1.0976 | 1.16E-05   | 4.9347 | GTF2IP20  |
| TC0300009139.hg.1                   | 2.3578  | 1.2374  | 1.40E-05   | 4.8553 | TM4SF4    |
| TC1000009522.hg.1                   | 0.44954 | -1.1535 | 1.40E-05   | 4.8541 |           |
| TC0500007761.hg.1                   | 0.40569 | -1.3016 | 1.57E-05   | 4.8028 | TMEM171   |
| TC0300010350.hg.1                   | 2.5832  | 1.3692  | 1.80E-05   | 4.7457 | WNT7A     |
| TC0800010823.hg.1                   | 2.0679  | 1.0482  | 1.99E-05   | 4.7008 | TCEB1     |
| TSUnmapped00000976.hg.1             | 16.059  | 4.0053  | 2.05E-05   | 4.688  |           |
| TC0700008182.hg.1                   | 0.37659 | -1.4089 | 2.43E-05   | 4.6147 |           |
| TC1500007833.hg.1                   | 2.0934  | 1.0658  | 2.47E-05   | 4.6065 | PML       |
| TC0700010604.hg.1                   | 0.40715 | -1.2964 | 2.57E-05   | 4.5904 | CPVL      |
| TC0900006522.hg.1                   | 2.4022  | 1.2644  | 2.61E-05   | 4.5829 | SLC1A1    |
| TC0200010630.hg.1                   | 0.45002 | -1.1519 | 2.73E-05   | 4.5642 |           |
| TC0300013513.hg.1                   | 0.46821 | -1.0948 | 2.91E-05   | 4.5363 | P3H2      |
| TC1600009958.hg.1                   | 0.45609 | -1.1326 | 2.98E-05   | 4.5264 | LOC613037 |
| TC0500009424.hg.1                   | 4.6363  | 2.213   | 3.30E-05   | 4.4812 | FGF18     |
| TC1600011501.hg.1                   | 0.44623 | -1.1641 | 3.53E-05   | 4.4517 | NPIP83    |
| TC0500011705.hg.1                   | 0.21187 | -2.2387 | 3.76E-05   | 4.4244 | NREP      |
| TC0100018403.hg.1                   | 2.331   | 1.221   | 4.38E-05   | 4.3582 | ERRF1     |
| TC0200013861.hg.1                   | 7.6862  | 2.9423  | 4.41E-05   | 4.356  | MALL      |
| TC1700011097.hg.1                   | 2.365   | 1.2418  | 4.60E-05   | 4.3375 | LRRC59    |
| TC0100018463.hg.1                   | 2.0041  | 1.0029  | 5.76E-05   | 4.2396 | RHOC      |
| TC0800012176.hg.1                   | 2.3328  | 1.2221  | 6.58E-05   | 4.1818 | PLEC      |
| TC0600011960.hg.1                   | 2.0542  | 1.0386  | 7.93E-05   | 4.1005 | TNFRSF21  |
| TC0900010506.hg.1                   | 2.3295  | 1.22    | 7.94E-05   | 4.1001 | KRT18P24  |
| TC1100006911.hg.1                   | 2.196   | 1.1349  | 9.74E-05   | 4.0116 | SPON1     |
| TC1600007037.hg.1                   | 0.45641 | -1.1316 | 0.00011186 | 3.9513 | NPIPA7    |
| TC1600011505.hg.1                   | 0.46716 | -1.098  | 0.00013025 | 3.8852 | NPIP84    |
| TC1100007899.hg.1                   | 4.3076  | 2.1069  | 0.0001307  | 3.8837 | RARRES3   |



|                   |         |         |            |        |              |
|-------------------|---------|---------|------------|--------|--------------|
| TC0100018480.hg.1 | 0.47472 | -1.0749 | 0.00014001 | 3.8538 | NBPF14       |
| TC0700008624.hg.1 | 0.46978 | -1.0899 | 0.0001411  | 3.8505 |              |
| TC0500009863.hg.1 | 2.7543  | 1.4617  | 0.00014395 | 3.8418 | LPCAT1       |
| TC1700007135.hg.1 | 2.3486  | 1.2318  | 0.00016314 | 3.7874 | TRIM16L      |
| TC2100007316.hg.1 | 2.294   | 1.1979  | 0.00016469 | 3.7833 |              |
| TC0800007888.hg.1 | 5.6227  | 2.4913  | 0.00017145 | 3.7659 | C8orf34      |
| TC0600013684.hg.1 | 0.45473 | -1.1369 | 0.0001811  | 3.7421 |              |
| TC0300013068.hg.1 | 0.47352 | -1.0785 | 0.00019033 | 3.7205 | MECOM        |
| TC1000012117.hg.1 | 2.6462  | 1.4039  | 0.00019805 | 3.7032 | CHST15       |
| TC2000009058.hg.1 | 20.6    | 4.3646  | 0.000216   | 3.6655 | TGM2         |
| TC1100012318.hg.1 | 2.7145  | 1.4407  | 0.00023063 | 3.6371 | IL18         |
| TC1600009916.hg.1 | 0.4768  | -1.0685 | 0.00023584 | 3.6274 | NPIP811      |
| TC2100007208.hg.1 | 4.4369  | 2.1495  | 0.00023615 | 3.6268 | MX1          |
| TC1600009929.hg.1 | 0.45401 | -1.1392 | 0.00024134 | 3.6174 |              |
| TC0700012230.hg.1 | 5.0991  | 2.3502  | 0.00026945 | 3.5695 | NRCAM        |
| TC0200011138.hg.1 | 16.964  | 4.0844  | 0.00028668 | 3.5426 | UGT1A8       |
| TC0100018478.hg.1 | 0.4572  | -1.1291 | 0.00030028 | 3.5225 | NBPF10       |
| TC0100014081.hg.1 | 4.2223  | 2.078   | 0.0003083  | 3.511  | PDZK1IP1     |
| TC1200007686.hg.1 | 2.0359  | 1.0256  | 0.0003768  | 3.4239 | KRT18        |
| TC1100011833.hg.1 | 0.4898  | -1.0297 | 0.00042113 | 3.3756 | SYTL2        |
| TC0300013520.hg.1 | 2.0367  | 1.0263  | 0.00043462 | 3.3619 | CLDN1        |
| TC0700006890.hg.1 | 12.643  | 3.6603  | 0.00044084 | 3.3557 | IL6          |
| TC0700012939.hg.1 | 0.48302 | -1.0498 | 0.00045549 | 3.3415 |              |
| TC2100007485.hg.1 | 2.0813  | 1.0575  | 0.00048804 | 3.3115 |              |
| TC0100011267.hg.1 | 2.2419  | 1.1647  | 0.00051146 | 3.2912 | ATP2B4       |
| TC0800008263.hg.1 | 0.19375 | -2.3677 | 0.00051449 | 3.2886 | ESRP1        |
| TC1500010369.hg.1 | 3.5502  | 1.8279  | 0.00051559 | 3.2877 | MFGE8        |
| TC0800009961.hg.1 | 2.1063  | 1.0747  | 0.00053081 | 3.2751 | CLU          |
| TC0100015871.hg.1 | 2.1078  | 1.0757  | 0.0005713  | 3.2431 | S100A16      |
| TC0900008891.hg.1 | 2.7627  | 1.4661  | 0.0006099  | 3.2147 | LRRRC8A      |
| TC0600008146.hg.1 | 2.4865  | 1.3141  | 0.00068409 | 3.1649 | RUNX2        |
| TC0100009364.hg.1 | 6.4234  | 2.6833  | 0.00073715 | 3.1324 | CSF1         |
| TC1800007655.hg.1 | 2.3289  | 1.2197  | 0.00074711 | 3.1266 | LOC100505817 |
| TC1700008228.hg.1 | 2.1864  | 1.1286  | 0.00076112 | 3.1185 | ITGA3        |
| TC0600011185.hg.1 | 2.4208  | 1.2755  | 0.00081624 | 3.0882 | HIST1H2BK    |
| TC1500010700.hg.1 | 0.49015 | -1.0287 | 0.00083058 | 3.0806 | SNHG14       |
| TC0600014217.hg.1 | 2.1942  | 1.1337  | 0.00091087 | 3.0405 | SERPINB1     |
| TC2200007356.hg.1 | 2.659   | 1.4109  | 0.00095398 | 3.0205 | KDEL3        |
| TC0100007584.hg.1 | 3.1258  | 1.6442  | 0.00095668 | 3.0192 | PTPRU        |
| TC1200010038.hg.1 | 2.6995  | 1.4327  | 0.0010155  | 2.9933 | EPS8         |
| TC0500007738.hg.1 | 17.418  | 4.1225  | 0.001119   | 2.9512 | MAP1B        |

|                   |         |         |           |        |          |
|-------------------|---------|---------|-----------|--------|----------|
| TC1800006897.hg.1 | 2.725   | 1.4462  | 0.001154  | 2.9378 | LAMA3    |
| TC1100011602.hg.1 | 2.3833  | 1.253   | 0.0011963 | 2.9222 | UCP2     |
| TC1000012427.hg.1 | 2.0005  | 1.0004  | 0.0012699 | 2.8962 | AKR1C1   |
| TC0600008622.hg.1 | 3.1417  | 1.6515  | 0.0013071 | 2.8837 | SH3BGRL2 |
| TC0100016206.hg.1 | 22.378  | 4.484   | 0.0013343 | 2.8748 | SH2D18   |
| TC2200007204.hg.1 | 15.894  | 3.9904  | 0.0013361 | 2.8742 | HMOX1    |
| TC0400010125.hg.1 | 3.33    | 1.7355  | 0.0013585 | 2.8669 | FGFBP1   |
| TC0600009597.hg.1 | 4.6159  | 2.2066  | 0.0014889 | 2.8271 | TNFAIP3  |
| TC1900009095.hg.1 | 2.1634  | 1.1133  | 0.0015276 | 2.816  |          |
| TC0300012768.hg.1 | 34.482  | 5.1078  | 0.00154   | 2.8125 | CP       |
| TC1400008940.hg.1 | 2.2862  | 1.193   | 0.0017091 | 2.7672 | NFKBIA   |
| TC0300011815.hg.1 | 2.0927  | 1.0653  | 0.0017695 | 2.7521 | DCBLD2   |
| TC0800008243.hg.1 | 2.7481  | 1.4584  | 0.0017895 | 2.7473 | PDP1     |
| TC1200009829.hg.1 | 17.605  | 4.1379  | 0.0020188 | 2.6949 | CLEC4E   |
| TC1800007014.hg.1 | 2.0704  | 1.0499  | 0.0020979 | 2.6782 | DSG2     |
| TC1600009855.hg.1 | 0.49922 | -1.0022 | 0.0021484 | 2.6679 | NPIP6    |
| TC0400011015.hg.1 | 3.5044  | 1.8092  | 0.0021656 | 2.6644 | CXCL3    |
| TC0100013908.hg.1 | 2.0862  | 1.0609  | 0.0021756 | 2.6624 | SLC2A1   |
| TC1200010743.hg.1 | 4.9828  | 2.317   | 0.0022297 | 2.6518 |          |
| TC0100012675.hg.1 | 2.1983  | 1.1364  | 0.002294  | 2.6394 | ACOT7    |
| TC1200009739.hg.1 | 3.0936  | 1.6293  | 0.0023011 | 2.6381 |          |
| TC0400007836.hg.1 | 14.879  | 3.8952  | 0.0025503 | 2.5934 | CXCL8    |
| TC1100011375.hg.1 | 3.1456  | 1.6534  | 0.0026819 | 2.5716 | C11orf24 |
| TC0500007044.hg.1 | 4.1104  | 2.0393  | 0.0027779 | 2.5563 | CDH6     |
| TC1000010567.hg.1 | 0.4385  | -1.1894 | 0.002796  | 2.5535 |          |
| TC0100017167.hg.1 | 2.7426  | 1.4555  | 0.0028746 | 2.5414 | LAMB3    |
| TC1000011186.hg.1 | 0.47259 | -1.0813 | 0.0029134 | 2.5356 |          |
| TC2100008527.hg.1 | 2.0158  | 1.0114  | 0.0029539 | 2.5296 | SLC37A1  |
| TC0400007901.hg.1 | 3.2891  | 1.7177  | 0.0030019 | 2.5226 | SHROOM3  |
| TC1600006658.hg.1 | 6.9778  | 2.8028  | 0.0034162 | 2.4665 | IL32     |
| TC1400006659.hg.1 | 2.073   | 1.0517  | 0.0037051 | 2.4312 | MMP14    |
| TC0200009402.hg.1 | 2.557   | 1.3545  | 0.0040009 | 2.3978 | MGAT5    |
| TC1200010229.hg.1 | 6.34    | 2.6645  | 0.0044017 | 2.3564 | PTHLH    |
| TC0400007840.hg.1 | 3.4314  | 1.7788  | 0.0044375 | 2.3529 | CXCL1    |
| TC0800009287.hg.1 | 3.9358  | 1.9766  | 0.0046486 | 2.3327 |          |
| TC1100007273.hg.1 | 2.6919  | 1.4287  | 0.0047299 | 2.3252 | CD44     |
| TC0800009523.hg.1 | 2.1346  | 1.094   | 0.0049644 | 2.3041 | MFHAS1   |
| TC0400009129.hg.1 | 6.9784  | 2.8029  | 0.0050385 | 2.2977 | RXFP1    |
| TC0100010798.hg.1 | 3.3454  | 1.7422  | 0.0050545 | 2.2963 | QSOX1    |
| TC0300013146.hg.1 | 2.2661  | 1.1802  | 0.0051757 | 2.286  | TNFSF10  |
| TC0100007645.hg.1 | 2.4391  | 1.2864  | 0.0053887 | 2.2685 | TINAGL1  |

|                   |         |         |           |        |            |
|-------------------|---------|---------|-----------|--------|------------|
| TC0100018451.hg.1 | 3.0596  | 1.6133  | 0.0054078 | 2.267  | GBP2       |
| TC1200009297.hg.1 | 4.9212  | 2.299   | 0.0060305 | 2.2196 |            |
| TC1900010851.hg.1 | 2.0917  | 1.0647  | 0.0062866 | 2.2016 | ETHE1      |
| TC1300007561.hg.1 | 2.9978  | 1.5839  | 0.0064453 | 2.1908 | SCEL       |
| TC0600011938.hg.1 | 9.2472  | 3.209   | 0.0069224 | 2.1597 | CLIC5      |
| TC0900012047.hg.1 | 2.9186  | 1.5453  | 0.0072154 | 2.1417 |            |
| TC1900007465.hg.1 | 3.9411  | 1.9786  | 0.007801  | 2.1078 | ZNF486     |
| TC0700013394.hg.1 | 7.0241  | 2.8123  | 0.0079167 | 2.1015 | CCDC146    |
| TC1100008514.hg.1 | 2.0995  | 1.0701  | 0.0080694 | 2.0932 | TSKU       |
| TC2000008217.hg.1 | 2.222   | 1.1518  | 0.0081731 | 2.0876 | SLC4A11    |
| TC1400009186.hg.1 | 2.5892  | 1.3725  | 0.0082005 | 2.0862 | ERO1A      |
| TC0X00007190.hg.1 | 2.6144  | 1.3865  | 0.0082021 | 2.0861 | PORCN      |
| TC1900009443.hg.1 | 86.534  | 6.4352  | 0.0084834 | 2.0714 | C3         |
| TC0600007374.hg.1 | 2.5117  | 1.3287  | 0.0087172 | 2.0596 | HIST1H2AI  |
| TC1100011259.hg.1 | 3.7567  | 1.9095  | 0.0091786 | 2.0372 | FOSL1      |
| TC0100018482.hg.1 | 2.0263  | 1.0189  | 0.0094234 | 2.0258 | HIST2H2AA3 |
| TC0600014277.hg.1 | 5.4962  | 2.4584  | 0.0096522 | 2.0154 | HLA-DMA    |
| TC1600011453.hg.1 | 2.336   | 1.224   | 0.009814  | 2.0082 | MC1R       |
| TC1100013152.hg.1 | 14.257  | 3.8336  | 0.010179  | 1.9923 | SAA2-SAA4  |
| TC0900007667.hg.1 | 2.0836  | 1.0591  | 0.011182  | 1.9515 | PSAT1      |
| TC0800006975.hg.1 | 2.9564  | 1.5638  | 0.011475  | 1.9402 | BMP1       |
| TC0700010167.hg.1 | 2.0514  | 1.0366  | 0.011774  | 1.9291 | ACTB       |
| TC1600011546.hg.1 | 3.4303  | 1.7784  | 0.012041  | 1.9194 | PLLP       |
| TC1900009076.hg.1 | 2.6474  | 1.4046  | 0.013578  | 1.8672 | PLPP2      |
| TC1100006995.hg.1 | 16.157  | 4.0141  | 0.013658  | 1.8646 | SAA1       |
| TC2200007312.hg.1 | 4.0824  | 2.0294  | 0.014328  | 1.8438 | LGALS1     |
| TC1400007950.hg.1 | 2.092   | 1.0649  | 0.01479   | 1.83   | CALM1      |
| TC2200008370.hg.1 | 2.4207  | 1.2754  | 0.016148  | 1.7919 | XBP1       |
| TC1100012825.hg.1 | 4.2145  | 2.0754  | 0.016956  | 1.7707 |            |
| TC0700012917.hg.1 | 2.216   | 1.1479  | 0.017072  | 1.7677 | TPK1       |
| TC1500007695.hg.1 | 0.47601 | -1.0709 | 0.017093  | 1.7672 | PAQR5      |
| TC1500009504.hg.1 | 5.8762  | 2.5549  | 0.017118  | 1.7666 | PYGO1      |
| TC0100014988.hg.1 | 15.17   | 3.9231  | 0.017381  | 1.7599 | F3         |
| TC0800009529.hg.1 | 2.5689  | 1.3612  | 0.01792   | 1.7467 | PPP1R3B    |
| TC1600008609.hg.1 | 2.7276  | 1.4476  | 0.018908  | 1.7234 | HSD17B2    |
| TC0600013757.hg.1 | 3.2075  | 1.6814  | 0.019713  | 1.7052 | SOD2       |
| TC1100012966.hg.1 | 2.863   | 1.5175  | 0.020106  | 1.6967 | MICAL2     |
| TC0600011232.hg.1 | 3.4485  | 1.786   | 0.02083   | 1.6813 | HIST1H1B   |
| TC1100012513.hg.1 | 3.0342  | 1.6013  | 0.021235  | 1.6729 | H2AFX      |
| TC0400009716.hg.1 | 2.1155  | 1.081   | 0.023857  | 1.6224 |            |
| TC2000007341.hg.1 | 4.4346  | 2.1488  | 0.024612  | 1.6088 | FAM83D     |

|                   |        |        |          |        |            |
|-------------------|--------|--------|----------|--------|------------|
| TC1700008719.hg.1 | 2.1701 | 1.1178 | 0.025668 | 1.5906 | KPNA2      |
| TC1900011741.hg.1 | 18.554 | 4.2136 | 0.025677 | 1.5904 | CEACAM5    |
| TC0300012236.hg.1 | 48.703 | 5.6059 | 0.025862 | 1.5873 | MUC13      |
| TC1700011813.hg.1 | 4.2377 | 2.0833 | 0.025996 | 1.5851 | ST6GALNAC1 |
| TC0700010965.hg.1 | 4.7822 | 2.2577 | 0.02635  | 1.5792 | IGFBP3     |
| TC1400008677.hg.1 | 9.4859 | 3.2458 | 0.026612 | 1.5749 | SLC7A7     |
| TC0700008073.hg.1 | 2.5172 | 1.3318 | 0.026901 | 1.5702 | POR        |
| TC0900008847.hg.1 | 92.409 | 6.53   | 0.027097 | 1.5671 | LCN2       |
| TC0200008666.hg.1 | 7.542  | 2.9149 | 0.027286 | 1.5641 | IL1R1      |
| TC0400007556.hg.1 | 2.0711 | 1.0504 | 0.027352 | 1.563  | SRDSA3     |
| TC1900011382.hg.1 | 3.6654 | 1.874  | 0.028514 | 1.5449 |            |
| TC1200011470.hg.1 | 2.979  | 1.5748 | 0.029339 | 1.5326 | DUSP6      |
| TC1500007062.hg.1 | 5.3541 | 2.4206 | 0.029833 | 1.5253 | CKMT1B     |
| TC1500007067.hg.1 | 5.1968 | 2.3776 | 0.030109 | 1.5213 | CKMT1A     |
| TC0700007623.hg.1 | 2.3584 | 1.2378 | 0.032296 | 1.4908 |            |
| TC0100017084.hg.1 | 29.489 | 4.8821 | 0.032683 | 1.4857 | CTSE       |
| TC1600007537.hg.1 | 2.1939 | 1.1335 | 0.034092 | 1.4674 | TGFB111    |
| TC0300010930.hg.1 | 6.8064 | 2.7669 | 0.035989 | 1.4438 | SLC6A20    |
| TC0400009258.hg.1 | 3.3333 | 1.737  | 0.036151 | 1.4419 | PALLD      |
| TC0100015710.hg.1 | 2.8042 | 1.4876 | 0.03748  | 1.4262 |            |
| TC0900007552.hg.1 | 11.162 | 3.4805 | 0.038518 | 1.4143 | GDA        |
| TC0100015705.hg.1 | 2.4274 | 1.2794 | 0.039345 | 1.4051 |            |
| TC0600014106.hg.1 | 19.528 | 4.2875 | 0.040573 | 1.3918 | CFB        |
| TC0100015706.hg.1 | 2.8229 | 1.4972 | 0.042125 | 1.3755 |            |
| TC0500012470.hg.1 | 17.915 | 4.1631 | 0.045449 | 1.3425 | CD74       |
| TC1200006730.hg.1 | 2.0147 | 1.0106 | 0.046541 | 1.3322 | RIMKLB     |
| TC2100006834.hg.1 | 66.084 | 6.0462 | 0.048846 | 1.3112 | LOC284825  |
| TC0600014273.hg.1 | 18.562 | 4.2142 | 0.049117 | 1.3088 | HLA-DRB1   |
| TC1900006814.hg.1 | 30.376 | 4.9249 | 0.049738 | 1.3033 |            |
| TC1300009580.hg.1 | 8.2626 | 3.0466 | 0.052395 | 1.2807 | SLC15A1    |
| TC0600007650.hg.1 | 56.592 | 5.8225 | 0.056004 | 1.2518 | HLA-DRA    |
| TC1000007641.hg.1 | 6.6423 | 2.7317 | 0.061153 | 1.2136 | DKK1       |
| TC0200010980.hg.1 | 113.25 | 6.8234 | 0.064347 | 1.1915 | CCL20      |
| TC0300008123.hg.1 | 7.3328 | 2.8744 | 0.071996 | 1.1427 | LINC00973  |
| TC1900011742.hg.1 | 11.56  | 3.5311 | 0.072875 | 1.1374 | CEACAM6    |
| TC0100011402.hg.1 | 22.861 | 4.5148 | 0.089003 | 1.0506 | C4BPA      |
| TC0800011064.hg.1 | 17.268 | 4.11   | 0.089226 | 1.0495 | CALB1      |
| TC0400011013.hg.1 | 61.367 | 5.9394 | 0.098596 | 1.0061 | PPBP       |

Supplementary Table 5A: Upregulated Gene Set Enrichment Analysis for 167 gene set with nominal p-value < 0.05.

| GS                                                                              | Size | ES   | N ES | NOM p-val | FDR q-val | FWER p-val | Rank at Max | Leading Edge                     |
|---------------------------------------------------------------------------------|------|------|------|-----------|-----------|------------|-------------|----------------------------------|
| <a href="#">OCT1_Q2</a>                                                         | 5    | 0.88 | 2.12 | 0         | 0.231     | 0.156      | 24          | tags=100%, list=14%, signal=113% |
| <a href="#">YTATTTTNR_MEF2_Q2</a>                                               | 12   | 0.59 | 2.05 | 0.002     | 0.223     | 0.271      | 24          | tags=50%, list=14%, signal=54%   |
| <a href="#">WGGAATGY_TEF1_Q6</a>                                                | 10   | 0.65 | 2.02 | 0.002     | 0.192     | 0.338      | 33          | tags=70%, list=20%, signal=82%   |
| <a href="#">CTATGCA_MIR153</a>                                                  | 6    | 0.75 | 1.97 | 0.002     | 0.226     | 0.476      | 29          | tags=83%, list=17%, signal=97%   |
| <a href="#">TAATAAT_MIR126</a>                                                  | 5    | 0.79 | 1.92 | 0.002     | 0.266     | 0.621      | 38          | tags=100%, list=23%, signal=126% |
| <a href="#">SOX5_Q1</a>                                                         | 6    | 0.72 | 1.87 | 0.002     | 0.252     | 0.781      | 20          | tags=67%, list=12%, signal=73%   |
| <a href="#">BLANCO MELO RESPIRATORY SYNCYTIAL VIRUS INFECTION_A594_CELLS_DN</a> | 5    | 0.74 | 1.77 | 0.005     | 0.969     | 0.977      | 26          | tags=80%, list=16%, signal=92%   |
| <a href="#">AMEF2_Q6</a>                                                        | 7    | 0.68 | 1.89 | 0.007     | 0.281     | 0.718      | 27          | tags=71%, list=16%, signal=82%   |
| <a href="#">MIR1827</a>                                                         | 7    | 0.64 | 1.78 | 0.007     | 0.276     | 0.949      | 64          | tags=100%, list=39%, signal=156% |
| <a href="#">NKX62_Q2</a>                                                        | 5    | 0.75 | 1.82 | 0.009     | 0.255     | 0.894      | 44          | tags=100%, list=27%, signal=132% |
| <a href="#">YCATTAA_UNKNOWN</a>                                                 | 12   | 0.52 | 1.82 | 0.01      | 0.272     | 0.887      | 30          | tags=50%, list=18%, signal=57%   |
| <a href="#">DELYS_THYROID_CANCER_DN</a>                                         | 7    | 0.68 | 1.89 | 0.012     | 0.776     | 0.759      | 27          | tags=71%, list=16%, signal=82%   |
| <a href="#">AAAGACA_MIR511</a>                                                  | 5    | 0.76 | 1.89 | 0.012     | 0.243     | 0.722      | 24          | tags=80%, list=14%, signal=91%   |
| <a href="#">GGATTA_PITX2_Q2</a>                                                 | 8    | 0.61 | 1.78 | 0.012     | 0.295     | 0.949      | 23          | tags=50%, list=14%, signal=55%   |
| <a href="#">HNF1_C</a>                                                          | 8    | 0.61 | 1.83 | 0.013     | 0.275     | 0.868      | 33          | tags=63%, list=20%, signal=74%   |
| <a href="#">NKX61_Q1</a>                                                        | 5    | 0.71 | 1.76 | 0.014     | 0.286     | 0.96       | 15          | tags=60%, list=9%, signal=64%    |
| <a href="#">ZNF146_TARGET_GENES</a>                                             | 8    | 0.62 | 1.85 | 0.015     | 0.27      | 0.832      | 67          | tags=100%, list=40%, signal=160% |
| <a href="#">AAAYRNCTG_UNKNOWN</a>                                               | 8    | 0.58 | 1.72 | 0.015     | 0.338     | 0.987      | 30          | tags=63%, list=18%, signal=73%   |
| <a href="#">P53_Q2</a>                                                          | 7    | 0.61 | 1.79 | 0.017     | 0.284     | 0.93       | 20          | tags=57%, list=12%, signal=62%   |
| <a href="#">POU6F1_Q1</a>                                                       | 7    | 0.62 | 1.73 | 0.02      | 0.34      | 0.983      | 30          | tags=71%, list=18%, signal=84%   |
| <a href="#">MIR8063</a>                                                         | 5    | 0.69 | 1.77 | 0.021     | 0.371     | 0.992      | 34          | tags=80%, list=20%, signal=98%   |
| <a href="#">HNF4ALPHA_Q6</a>                                                    | 5    | 0.65 | 1.59 | 0.021     | 0.467     | 1          | 16          | tags=60%, list=10%, signal=64%   |
| <a href="#">CEBP_Q1</a>                                                         | 5    | 0.68 | 1.64 | 0.023     | 0.451     | 1          | 24          | tags=60%, list=14%, signal=68%   |
| <a href="#">RODRIGUES_THYROID_CARCINOMA_ANAPLASTIC_DN</a>                       | 9    | 0.59 | 1.76 | 0.026     | 0.675     | 0.979      | 33          | tags=67%, list=20%, signal=79%   |
| <a href="#">FOXO4_Q1</a>                                                        | 5    | 0.66 | 1.66 | 0.026     | 0.47      | 1          | 58          | tags=100%, list=35%, signal=149% |
| <a href="#">VDR_Q6</a>                                                          | 6    | 0.65 | 1.66 | 0.027     | 0.436     | 0.999      | 27          | tags=67%, list=16%, signal=77%   |
| <a href="#">MIR548N</a>                                                         | 6    | 0.64 | 1.64 | 0.027     | 0.466     | 1          | 63          | tags=100%, list=38%, signal=155% |
| <a href="#">MIR5696</a>                                                         | 6    | 0.63 | 1.63 | 0.03      | 0.477     | 1          | 64          | tags=100%, list=39%, signal=157% |
| <a href="#">TGAAAA_NFAT_Q4_Q1</a>                                               | 29   | 0.33 | 1.55 | 0.03      | 0.48      | 1          | 38          | tags=41%, list=23%, signal=44%   |
| <a href="#">ER_Q6_Q1</a>                                                        | 7    | 0.58 | 1.66 | 0.031     | 0.484     | 1          | 58          | tags=86%, list=35%, signal=126%  |
| <a href="#">NFY_C</a>                                                           | 5    | 0.65 | 1.59 | 0.041     | 0.456     | 1          | 23          | tags=60%, list=14%, signal=68%   |
| <a href="#">COUP_Q1</a>                                                         | 5    | 0.67 | 1.58 | 0.041     | 0.444     | 1          | 16          | tags=60%, list=10%, signal=64%   |
| <a href="#">MIR10527_5P</a>                                                     | 7    | 0.58 | 1.62 | 0.043     | 0.463     | 1          | 32          | tags=57%, list=19%, signal=68%   |
| <a href="#">HAMAI_APOPTOSIS_VIA_TRAIL_UP</a>                                    | 5    | 0.63 | 1.55 | 0.047     | 1         | 1          | 24          | tags=60%, list=14%, signal=68%   |
| <a href="#">MIR7157_5P</a>                                                      | 5    | 0.64 | 1.56 | 0.047     | 0.468     | 1          | 23          | tags=80%, list=14%, signal=90%   |

|                     |    |      |      |       |       |   |    |                                 |
|---------------------|----|------|------|-------|-------|---|----|---------------------------------|
| MIR302C_5P          | 11 | 0.48 | 1.61 | 0.048 | 0.493 | 1 | 33 | tags=64%, list=20%, signal=74%  |
| ZNF843_TARGET_GENES | 9  | 0.51 | 1.59 | 0.048 | 0.472 | 1 | 69 | tags=89%, list=42%, signal=144% |

Supplementary Table 5B: Downregulated Gene Set Enrichment Analysis for 167 gene set with nominal p-value < 0.05.

| GS                                                                                                                                               | Size | ES    | NES   | NOM p-val | FDR q-val | FWER p-val | Rank at Max | Leading Edge                     |
|--------------------------------------------------------------------------------------------------------------------------------------------------|------|-------|-------|-----------|-----------|------------|-------------|----------------------------------|
| <a href="#">NABA_MATRISOME_ASSOCIATED</a>                                                                                                        | 21   | -0.61 | -2.29 | 0         | 0.012     | 0.009      | 34          | tags=57%, list=20%, signal=63%   |
| <a href="#">NABA_MATRISOME</a>                                                                                                                   | 24   | -0.59 | -2.28 | 0         | 0.007     | 0.01       | 34          | tags=54%, list=20%, signal=58%   |
| <a href="#">CREIGHTON_ENDOCRINE_THERAPY_RESISTANCE_3</a>                                                                                         | 17   | -0.63 | -2.19 | 0         | 0.009     | 0.021      | 29          | tags=53%, list=17%, signal=58%   |
| <a href="#">DELYS_THYROID_CANCER_UP</a>                                                                                                          | 21   | -0.58 | -2.15 | 0         | 0.013     | 0.037      | 72          | tags=90%, list=43%, signal=140%  |
| <a href="#">NUYTTEN_EZH2_TARGETS_UP</a>                                                                                                          | 28   | -0.54 | -2.13 | 0         | 0.014     | 0.052      | 52          | tags=64%, list=31%, signal=78%   |
| <a href="#">LEI_MYB_TARGETS</a>                                                                                                                  | 19   | -0.58 | -2.11 | 0         | 0.017     | 0.074      | 61          | tags=79%, list=37%, signal=111%  |
| <a href="#">ONDER_CDHI_TARGETS_2_DN</a>                                                                                                          | 26   | -0.53 | -2.11 | 0         | 0.015     | 0.074      | 52          | tags=65%, list=31%, signal=80%   |
| <a href="#">BLANCO_MELO_COVID19_BRONCHIAL_EPITHELIAL_CELLS_SARS_COV_2_INFECTION_UP</a>                                                           | 14   | -0.65 | -2.1  | 0         | 0.014     | 0.081      | 56          | tags=86%, list=34%, signal=118%  |
| <a href="#">BLANCO_MELO_RESPIRATORY_SYNCYTIAL_VIRUS_INFECTION_A594_CELLS_UP</a>                                                                  | 19   | -0.58 | -2.06 | 0         | 0.018     | 0.125      | 72          | tags=89%, list=43%, signal=140%  |
| <a href="#">WINTER_HYPOXIA_METAGENE</a>                                                                                                          | 10   | -0.7  | -2.04 | 0         | 0.022     | 0.166      | 31          | tags=70%, list=19%, signal=81%   |
| <a href="#">REACTOME_REGULATION_OF_INSULIN_LIKE_GROWTH_FACTOR_IGF_TRANSPORT_AND_UPTAKE_BY_INSULIN_LIKE_GROWTH_FACTOR_BINDING_PROTEINS_IGFBPS</a> | 6    | -0.81 | -1.99 | 0         | 0.031     | 0.301      | 26          | tags=83%, list=16%, signal=95%   |
| <a href="#">WP_OVERVIEW_OF_PROINFLAMMATORY_AND_PROFIBROTIC_MEDIATORS</a>                                                                         | 8    | -0.7  | -1.91 | 0         | 0.052     | 0.557      | 26          | tags=63%, list=16%, signal=71%   |
| <a href="#">MIYAGAWA_TARGETS_OF_EWSR1_ETS_FUSIONS_UP</a>                                                                                         | 5    | -0.83 | -1.91 | 0         | 0.051     | 0.569      | 34          | tags=100%, list=20%, signal=122% |
| <a href="#">HALLMARK_EPITHELIAL_MESENCHYMAL_TRANSITION</a>                                                                                       | 14   | -0.65 | -2.14 | 0         | 0         | 0          | 56          | tags=86%, list=34%, signal=118%  |
| <a href="#">HARRIS_HYPOXIA</a>                                                                                                                   | 7    | -0.78 | -2.01 | 0.002     | 0.027     | 0.235      | 31          | tags=86%, list=19%, signal=101%  |
| <a href="#">SMID_BREAST_CANCER_LUMINAL_B_DN</a>                                                                                                  | 19   | -0.56 | -2    | 0.002     | 0.03      | 0.275      | 52          | tags=74%, list=31%, signal=95%   |
| <a href="#">REACTOME_CYTOKINE_SIGNALING_IN_IMMUNE_SYSTEM</a>                                                                                     | 16   | -0.59 | -1.99 | 0.002     | 0.03      | 0.305      | 57          | tags=75%, list=34%, signal=103%  |
| <a href="#">MISSIAGLIA_REGULATED_BY_METHYLATION_UP</a>                                                                                           | 12   | -0.63 | -1.97 | 0.002     | 0.031     | 0.345      | 70          | tags=100%, list=42%, signal=160% |
| <a href="#">PLASARI_TGFB1_TARGETS_10HR_UP</a>                                                                                                    | 10   | -0.66 | -1.95 | 0.002     | 0.037     | 0.414      | 64          | tags=100%, list=39%, signal=153% |
| <a href="#">ALTEMEIER_RESPONSE_TO_LPS_WITH_MECHANICAL_VENTILATION</a>                                                                            | 10   | -0.62 | -1.85 | 0.002     | 0.067     | 0.771      | 71          | tags=100%, list=43%, signal=164% |
| <a href="#">BLANCO_MELO_COVID19_SARS_COV_2_INFECTION_A594_CELLS_UP</a>                                                                           | 5    | -0.77 | -1.74 | 0.002     | 0.105     | 0.984      | 27          | tags=80%, list=16%, signal=93%   |

|                                                              |    |       |       |       |       |       |    |                                        |
|--------------------------------------------------------------|----|-------|-------|-------|-------|-------|----|----------------------------------------|
| <a href="#">LIANG_SILENCED_BY_METHYLATION_2</a>              | 9  | -0.73 | -2.07 | 0.003 | 0.019 | 0.12  | 52 | tags=100%,<br>list=31%,<br>signal=138% |
| <a href="#">SENESE_HDAC1_AND_HDAC2_TARGETS_UP</a>            | 13 | -0.61 | -2.03 | 0.003 | 0.023 | 0.19  | 20 | tags=46%,<br>list=12%,<br>signal=48%   |
| <a href="#">REACTOME_G_ALPHA_I_SIGNALLING_EVENTS</a>         | 7  | -0.72 | -1.91 | 0.003 | 0.054 | 0.557 | 33 | tags=71%,<br>list=20%,<br>signal=85%   |
| WP_IL18_SIGNALING_PATHWAY                                    | 9  | -0.68 | -1.88 | 0.003 | 0.06  | 0.68  | 22 | tags=56%,<br>list=13%,<br>signal=61%   |
| LINDSTEDT_DENDRITIC_CELL_MATURATION_A                        | 6  | -0.75 | -1.86 | 0.004 | 0.067 | 0.762 | 22 | tags=67%,<br>list=13%,<br>signal=74%   |
| <a href="#">GRAESSMANN_APOPTOSIS_BY_SERUM_DEPRIVATION_UP</a> | 12 | -0.64 | -1.97 | 0.005 | 0.032 | 0.34  | 69 | tags=100%,<br>list=42%,<br>signal=159% |
| KEGG_CYTOKINE_CYTOKINE_RECEPTOR_INTERACTION                  | 8  | -0.7  | -1.9  | 0.005 | 0.053 | 0.61  | 26 | tags=63%,<br>list=16%,<br>signal=71%   |
| REACTOME_SIGNALING_BY_INTERLEUKINS                           | 13 | -0.6  | -1.89 | 0.005 | 0.059 | 0.659 | 57 | tags=77%,<br>list=34%,<br>signal=108%  |
| SENESE_HDAC1_TARGETS_UP                                      | 15 | -0.55 | -1.87 | 0.005 | 0.063 | 0.719 | 33 | tags=47%,<br>list=20%,<br>signal=53%   |
| MARTINEZ_RB1_AND_TP53_TARGETS_UP                             | 15 | -0.54 | -1.84 | 0.005 | 0.066 | 0.818 | 58 | tags=80%,<br>list=35%,<br>signal=112%  |
| RICKMAN_HEAD_AND_NECK_CANCER_E                               | 5  | -0.76 | -1.72 | 0.005 | 0.12  | 0.993 | 10 | tags=60%,<br>list=6%,<br>signal=62%    |
| NAKAMURA_TUMOR_ZONE_PERIPHERAL_VS_CENTRAL_DN                 | 18 | -0.51 | -1.82 | 0.006 | 0.073 | 0.853 | 29 | tags=39%,<br>list=17%,<br>signal=42%   |
| FULCHER_INFLAMMATORY_RESPONSE_LECTIN_VS_LPS_UP               | 15 | -0.54 | -1.81 | 0.006 | 0.078 | 0.876 | 31 | tags=47%,<br>list=19%,<br>signal=52%   |
| GAURNIER_PSMD4_TARGETS                                       | 7  | -0.7  | -1.84 | 0.007 | 0.067 | 0.805 | 22 | tags=57%,<br>list=13%,<br>signal=63%   |
| REACTOME_POST_TRANSLATIONAL_PROTEIN_MODIFICATION             | 18 | -0.52 | -1.87 | 0.008 | 0.062 | 0.726 | 26 | tags=44%,<br>list=16%,<br>signal=47%   |
| ONDER_CDH1_TARGETS_3_DN                                      | 8  | -0.64 | -1.78 | 0.008 | 0.095 | 0.94  | 24 | tags=50%,<br>list=14%,<br>signal=56%   |
| CHARAFE_BREAST_CANCER_LUMINAL_VS_BASAL_DN                    | 18 | -0.53 | -1.88 | 0.009 | 0.062 | 0.7   | 89 | tags=100%,<br>list=54%,<br>signal=192% |
| REACTOME_INTERLEUKIN_10_SIGNALING                            | 6  | -0.73 | -1.78 | 0.009 | 0.095 | 0.949 | 26 | tags=67%,<br>list=16%,<br>signal=76%   |
| REACTOME_INTERLEUKIN_4_AND_INTERLEUKIN_13_SIGNALING          | 8  | -0.65 | -1.77 | 0.009 | 0.093 | 0.957 | 33 | tags=63%,<br>list=20%,<br>signal=74%   |
| SWEET_LUNG_CANCER_KRAS_DN                                    | 8  | -0.66 | -1.79 | 0.01  | 0.095 | 0.933 | 7  | tags=38%,<br>list=4%,<br>signal=37%    |
| HINATA_NFKB_TARGETS_FIBROBLAST_UP                            | 7  | -0.67 | -1.75 | 0.01  | 0.102 | 0.972 | 22 | tags=57%,<br>list=13%,<br>signal=63%   |
| DODD_NASOPHARYNGEAL_CARCINOMA_UP                             | 29 | -0.45 | -1.84 | 0.011 | 0.07  | 0.789 | 58 | tags=59%,<br>list=35%,<br>signal=74%   |
| COLINA_TARGETS_OF_4EBP1_AND_4EBP2                            | 10 | -0.62 | -1.84 | 0.011 | 0.069 | 0.805 | 34 | tags=60%,<br>list=20%,<br>signal=71%   |
| REACTOME_INNATE_IMMUNE_SYSTEM                                | 19 | -0.49 | -1.78 | 0.011 | 0.095 | 0.946 | 33 | tags=47%,<br>list=20%,<br>signal=52%   |
| CAIRO_LIVER_DEVELOPMENT_DN                                   | 5  | -0.75 | -1.71 | 0.011 | 0.12  | 0.994 | 14 | tags=60%,<br>list=8%,<br>signal=64%    |
| REACTOME_PEPTIDE_LIGAND_BINDING_RECEPTORS                    | 8  | -0.66 | -1.77 | 0.012 | 0.094 | 0.955 | 44 | tags=75%,<br>list=27%,<br>signal=97%   |

|                                                           |    |       |       |       |       |       |    |                                        |
|-----------------------------------------------------------|----|-------|-------|-------|-------|-------|----|----------------------------------------|
| REACTOME_CHEMOKINE_RECEPTORS_BIND_CHEMOKINES              | 5  | -0.74 | -1.71 | 0.012 | 0.12  | 0.996 | 18 | tags=60%,<br>list=11%,<br>signal=65%   |
| BUYTAERT_PHOTODYNAMIC_THERAPY_STRESS_DN                   | 8  | -0.63 | -1.69 | 0.012 | 0.127 | 0.998 | 56 | tags=88%,<br>list=34%,<br>signal=126%  |
| <a href="#">HALLMARK_TNFA_SIGNALING_VIA_NFKB</a>          | 13 | -0.55 | -1.79 | 0.012 | 0.064 | 0.075 | 67 | tags=85%,<br>list=40%,<br>signal=131%  |
| REACTOME_CLASS_A_1_RHODOPSIN_LIKE_RECEPTORS               | 8  | -0.66 | -1.76 | 0.013 | 0.094 | 0.963 | 44 | tags=75%,<br>list=27%,<br>signal=97%   |
| CHYLA_CBFA2T3_TARGETS_UP                                  | 6  | -0.7  | -1.71 | 0.013 | 0.12  | 0.995 | 29 | tags=67%,<br>list=17%,<br>signal=78%   |
| WP_NETWORK_MAP_OF_SARSCOV2_SIGNALING_PATHWAY              | 12 | -0.54 | -1.68 | 0.013 | 0.129 | 0.998 | 69 | tags=83%,<br>list=42%,<br>signal=132%  |
| <a href="#">HES2_TARGET_GENES</a>                         | 23 | -0.46 | -1.73 | 0.013 | 1     | 0.987 | 33 | tags=39%,<br>list=20%,<br>signal=42%   |
| SABATES_COLORECTAL_ADENOMA_UP                             | 9  | -0.6  | -1.71 | 0.014 | 0.121 | 0.994 | 18 | tags=44%,<br>list=11%,<br>signal=47%   |
| GERY_CEBP_TARGETS                                         | 6  | -0.67 | -1.68 | 0.014 | 0.127 | 0.998 | 14 | tags=50%,<br>list=8%,<br>signal=53%    |
| <a href="#">MIR33A_3P</a>                                 | 5  | -0.72 | -1.63 | 0.014 | 1     | 0.998 | 13 | tags=60%,<br>list=8%,<br>signal=63%    |
| NUYTEN_NIPPI_TARGETS_DN                                   | 11 | -0.59 | -1.78 | 0.015 | 0.096 | 0.955 | 76 | tags=100%,<br>list=46%,<br>signal=172% |
| PEDRIOLI_MIR31_TARGETS_DN                                 | 14 | -0.54 | -1.77 | 0.015 | 0.094 | 0.955 | 71 | tags=86%,<br>list=43%,<br>signal=137%  |
| MARTINEZ_TP53_TARGETS_UP                                  | 14 | -0.53 | -1.75 | 0.015 | 0.102 | 0.975 | 28 | tags=50%,<br>list=17%,<br>signal=55%   |
| ONDER_CDH1_TARGETS_1_DN                                   | 8  | -0.64 | -1.74 | 0.015 | 0.106 | 0.983 | 24 | tags=50%,<br>list=14%,<br>signal=56%   |
| TONKS_TARGETS_OF_RUNX1_RUNX1T1_FUSION_HSC_UP              | 10 | -0.59 | -1.71 | 0.015 | 0.12  | 0.995 | 37 | tags=60%,<br>list=22%,<br>signal=73%   |
| HINATA_NFKB_TARGETS_KERATINOCYTE_UP                       | 8  | -0.63 | -1.74 | 0.016 | 0.106 | 0.985 | 67 | tags=100%,<br>list=40%,<br>signal=160% |
| SMIRNOV_CIRCULATING_ENDOTHELIOCYTES_IN_CANCER_UP          | 8  | -0.63 | -1.72 | 0.016 | 0.12  | 0.994 | 18 | tags=50%,<br>list=11%,<br>signal=53%   |
| LEE_LIVER_CANCER_CIPROFIBRATE_UP                          | 5  | -0.73 | -1.7  | 0.016 | 0.125 | 0.998 | 16 | tags=60%,<br>list=10%,<br>signal=64%   |
| WINZEN_DEGRADED_VIA_KHSRP                                 | 10 | -0.62 | -1.84 | 0.017 | 0.066 | 0.811 | 31 | tags=60%,<br>list=19%,<br>signal=69%   |
| WP_FERROPTOSIS                                            | 6  | -0.68 | -1.7  | 0.017 | 0.122 | 0.996 | 14 | tags=50%,<br>list=8%,<br>signal=53%    |
| JINESH_BLEBBISTHIELD_VS_LIVE_CONTROL_DN                   | 12 | -0.57 | -1.77 | 0.018 | 0.095 | 0.957 | 48 | tags=67%,<br>list=29%,<br>signal=87%   |
| SMID_BREAST_CANCER_BASAL_UP                               | 18 | -0.5  | -1.79 | 0.019 | 0.095 | 0.936 | 51 | tags=67%,<br>list=31%,<br>signal=86%   |
| GRAESSMANN_RESPONSE_TO_MC_AND_SERUM_DEPRIVATION_UP        | 8  | -0.62 | -1.66 | 0.019 | 0.129 | 0.999 | 69 | tags=100%,<br>list=42%,<br>signal=163% |
| <a href="#">ZNF513_TARGET_GENES</a>                       | 5  | -0.72 | -1.64 | 0.019 | 1     | 0.998 | 19 | tags=60%,<br>list=11%,<br>signal=66%   |
| BLANCO_MELO_COVID19_SARS_COV_2_POS_PATIENT_LUNG_TISSUE_UP | 5  | -0.73 | -1.68 | 0.02  | 0.128 | 0.998 | 49 | tags=100%,<br>list=30%,<br>signal=138% |
| REACTOME_GPCR_LIGAND_BINDING                              | 12 | -0.53 | -1.68 | 0.021 | 0.125 | 0.998 | 33 | tags=50%,<br>list=20%,<br>signal=58%   |



|                                                                        |    |       |       |       |       |       |    |                                        |
|------------------------------------------------------------------------|----|-------|-------|-------|-------|-------|----|----------------------------------------|
| ZWANG_CLASS_3_TRANSIENTLY_INDUCED_BY_EGF                               | 10 | -0.58 | -1.66 | 0.021 | 0.131 | 0.998 | 68 | tags=90%,<br>list=41%,<br>signal=143%  |
| REACTOME_HEMOSTASIS                                                    | 9  | -0.58 | -1.65 | 0.021 | 0.131 | 1     | 31 | tags=56%,<br>list=19%,<br>signal=65%   |
| HELLEBREKERS_SILENCED_DURING_TUMOR_ANGIOGENESIS                        | 8  | -0.62 | -1.68 | 0.022 | 0.126 | 0.998 | 57 | tags=88%,<br>list=34%,<br>signal=127%  |
| REACTOME_NEUTROPHIL_DEGRANULATION                                      | 9  | -0.61 | -1.72 | 0.025 | 0.122 | 0.994 | 29 | tags=56%,<br>list=17%,<br>signal=64%   |
| BLANCO_MELO_COVID19_SARS_COV_2_INFECTION_A594_ACE2_EXPRESSING_CELLS_UP | 12 | -0.54 | -1.69 | 0.025 | 0.128 | 0.998 | 31 | tags=50%,<br>list=19%,<br>signal=57%   |
| BLANCO_MELO_COVID19_SARS_COV_2_INFECTION_CALU3_CELLS_UP                | 13 | -0.52 | -1.67 | 0.025 | 0.127 | 0.998 | 72 | tags=85%,<br>list=43%,<br>signal=138%  |
| BLANCO_MELO_BETA_INTERFERON_TREATED_BRONCHIAL_EPITHELIAL_CELLS_UP      | 19 | -0.46 | -1.66 | 0.026 | 0.129 | 0.999 | 54 | tags=63%,<br>list=33%,<br>signal=83%   |
| RUTELLA_RESPONSE_TO_HGF_UP                                             | 12 | -0.52 | -1.63 | 0.026 | 0.143 | 1     | 30 | tags=42%,<br>list=18%,<br>signal=47%   |
| <a href="#">HALLMARK_COMPLEMENT</a>                                    | 10 | -0.57 | -1.68 | 0.026 | 0.109 | 0.185 | 69 | tags=90%,<br>list=42%,<br>signal=145%  |
| SMID_BREAST_CANCER_RELAPSE_IN_BONE_DN                                  | 14 | -0.51 | -1.69 | 0.027 | 0.129 | 0.998 | 51 | tags=71%,<br>list=31%,<br>signal=94%   |
| KOINUMA_TARGETS_OF_SMAD2_OR_SMAD3                                      | 17 | -0.48 | -1.69 | 0.027 | 0.128 | 0.998 | 74 | tags=82%,<br>list=45%,<br>signal=133%  |
| JINESH_BLEBBISHIELD_TO_IMMUNE_CELL_FUSION_PBSHMS_DN                    | 17 | -0.49 | -1.68 | 0.027 | 0.13  | 0.998 | 30 | tags=41%,<br>list=18%,<br>signal=45%   |
| DAZARD_RESPONSE_TO_UV_NHEK_UP                                          | 10 | -0.58 | -1.67 | 0.027 | 0.125 | 0.998 | 28 | tags=50%,<br>list=17%,<br>signal=57%   |
| FOROUTAN_PRODRANK_TGFB_EMT_UP                                          | 7  | -0.63 | -1.65 | 0.027 | 0.132 | 1     | 56 | tags=86%,<br>list=34%,<br>signal=124%  |
| GROSS_HYPOXIA_VIA_ELK3_ONLY_UP                                         | 6  | -0.68 | -1.66 | 0.029 | 0.13  | 0.999 | 29 | tags=67%,<br>list=17%,<br>signal=78%   |
| PETROVA_ENDOTHELIUM_LYMPHATIC_VS_BLOOD_DN                              | 16 | -0.49 | -1.64 | 0.03  | 0.138 | 1     | 60 | tags=69%,<br>list=36%,<br>signal=97%   |
| PHONG_TNF_RESPONSE_VIA_P38_PARTIAL                                     | 11 | -0.55 | -1.68 | 0.031 | 0.124 | 0.998 | 82 | tags=100%,<br>list=49%,<br>signal=185% |
| DAZARD_RESPONSE_TO_UV_SCC_UP                                           | 5  | -0.71 | -1.65 | 0.031 | 0.133 | 1     | 22 | tags=60%,<br>list=13%,<br>signal=67%   |
| GROSS_HYPOXIA_VIA_ELK3_DN                                              | 9  | -0.57 | -1.63 | 0.032 | 0.144 | 1     | 78 | tags=100%,<br>list=47%,<br>signal=178% |
| WESTON_VEGFA_TARGETS_3HR                                               | 6  | -0.64 | -1.61 | 0.032 | 0.149 | 1     | 47 | tags=83%,<br>list=28%,<br>signal=112%  |
| SENESE_HDAC2_TARGETS_UP                                                | 5  | -0.67 | -1.56 | 0.032 | 0.177 | 1     | 59 | tags=100%,<br>list=36%,<br>signal=150% |
| SANA_TNF_SIGNALING_UP                                                  | 7  | -0.64 | -1.66 | 0.033 | 0.13  | 0.999 | 52 | tags=86%,<br>list=31%,<br>signal=120%  |
| FOSTER_TOLERANT_MACROPHAGE_UP                                          | 10 | -0.55 | -1.62 | 0.033 | 0.149 | 1     | 21 | tags=40%,<br>list=13%,<br>signal=43%   |
| FOROUTAN_TGFB_EMT_UP                                                   | 7  | -0.63 | -1.61 | 0.033 | 0.15  | 1     | 56 | tags=86%,<br>list=34%,<br>signal=124%  |
| MARTINEZ_RB1_TARGETS_UP                                                | 15 | -0.49 | -1.66 | 0.034 | 0.131 | 0.999 | 59 | tags=73%,<br>list=36%,<br>signal=103%  |
| RUTELLA_RESPONSE_TO_HGF_VS_CSF2RB_AND_IL4_UP                           | 12 | -0.52 | -1.64 | 0.034 | 0.138 | 1     | 30 | tags=42%,<br>list=18%,<br>signal=47%   |

|                                                |    |       |       |       |       |       |    |                                        |
|------------------------------------------------|----|-------|-------|-------|-------|-------|----|----------------------------------------|
| SMIRNOV_RESPONSE_TO_IR_6HR_UP                  | 5  | -0.68 | -1.57 | 0.034 | 0.174 | 1     | 58 | tags=100%,<br>list=35%,<br>signal=149% |
| ROZANOV_MMP14_TARGETS_UP                       | 10 | -0.56 | -1.62 | 0.035 | 0.15  | 1     | 50 | tags=70%,<br>list=30%,<br>signal=94%   |
| SCHUETZ_BREAST_CANCER_DUCTAL_INVASIVE_UP       | 15 | -0.47 | -1.62 | 0.036 | 0.148 | 1     | 25 | tags=33%,<br>list=15%,<br>signal=36%   |
| WP_VEGFAVEGFR2_SIGNALING_PATHWAY               | 6  | -0.64 | -1.58 | 0.036 | 0.175 | 1     | 64 | tags=100%,<br>list=39%,<br>signal=157% |
| ONDER_CDH1_SIGNALING_VIA_CTNNB1                | 7  | -0.61 | -1.55 | 0.036 | 0.184 | 1     | 33 | tags=57%,<br>list=20%,<br>signal=68%   |
| CHICAS_RB1_TARGETS_SENESCENT                   | 12 | -0.5  | -1.57 | 0.037 | 0.177 | 1     | 30 | tags=42%,<br>list=18%,<br>signal=47%   |
| <a href="#">HALLMARK_COAGULATION</a>           | 7  | -0.62 | -1.65 | 0.037 | 0.106 | 0.234 | 69 | tags=100%,<br>list=42%,<br>signal=164% |
| ENK_UV_RESPONSE_KERATINOCYTE_UP                | 13 | -0.5  | -1.61 | 0.038 | 0.151 | 1     | 67 | tags=85%,<br>list=40%,<br>signal=131%  |
| SMID_BREAST_CANCER_NORMAL_LIKE_UP              | 6  | -0.64 | -1.59 | 0.038 | 0.162 | 1     | 33 | tags=83%,<br>list=20%,<br>signal=100%  |
| ZHU_CMV_ALL_UP                                 | 7  | -0.6  | -1.57 | 0.038 | 0.178 | 1     | 72 | tags=100%,<br>list=43%,<br>signal=169% |
| LIAO_METASTASIS                                | 6  | -0.65 | -1.6  | 0.04  | 0.157 | 1     | 51 | tags=83%,<br>list=31%,<br>signal=116%  |
| KIM_WT1_TARGETS_UP                             | 10 | -0.56 | -1.61 | 0.041 | 0.15  | 1     | 71 | tags=90%,<br>list=43%,<br>signal=148%  |
| MARTINEZ_RB1_TARGETS_DN                        | 7  | -0.6  | -1.56 | 0.041 | 0.179 | 1     | 57 | tags=86%,<br>list=34%,<br>signal=125%  |
| NABA_SECRETED_FACTORS                          | 13 | -0.49 | -1.56 | 0.041 | 0.178 | 1     | 34 | tags=46%,<br>list=20%,<br>signal=53%   |
| PHONG_TNF_TARGETS_UP                           | 9  | -0.57 | -1.63 | 0.042 | 0.144 | 1     | 67 | tags=89%,<br>list=40%,<br>signal=141%  |
| BROWN_MYELOID_CELL_DEVELOPMENT_UP              | 5  | -0.68 | -1.56 | 0.042 | 0.181 | 1     | 28 | tags=60%,<br>list=17%,<br>signal=70%   |
| BOYLAN_MULTIPLE_MYELOMA_C_D_DN                 | 9  | -0.58 | -1.65 | 0.043 | 0.133 | 1     | 29 | tags=56%,<br>list=17%,<br>signal=64%   |
| SMID_BREAST_CANCER_RELAPSE_IN_BONE_UP          | 5  | -0.66 | -1.53 | 0.043 | 0.193 | 1     | 60 | tags=100%,<br>list=36%,<br>signal=152% |
| <a href="#">MIR5700</a>                        | 5  | -0.65 | -1.49 | 0.044 | 1     | 1     | 10 | tags=40%,<br>list=6%,<br>signal=41%    |
| HELLER_HDAC_TARGETS_SILENCED_BY_METHYLATION_UP | 11 | -0.52 | -1.57 | 0.045 | 0.175 | 1     | 59 | tags=73%,<br>list=36%,<br>signal=105%  |
| WESTON_VEGFA_TARGETS                           | 6  | -0.64 | -1.57 | 0.045 | 0.175 | 1     | 47 | tags=83%,<br>list=28%,<br>signal=112%  |
| TENEDINI_MEGAKARYOCYTE_MARKERS                 | 5  | -0.68 | -1.56 | 0.045 | 0.179 | 1     | 22 | tags=60%,<br>list=13%,<br>signal=67%   |
| <a href="#">CREB3L4_TARGET_GENES</a>           | 10 | -0.52 | -1.57 | 0.045 | 1     | 1     | 26 | tags=40%,<br>list=16%,<br>signal=45%   |
| BUYTAERT_PHOTODYNAMIC_THERAPY_STRESS_UP        | 17 | -0.46 | -1.58 | 0.046 | 0.168 | 1     | 74 | tags=76%,<br>list=45%,<br>signal=124%  |
| KEGG_CHEMOKINE_SIGNALING_PATHWAY               | 6  | -0.63 | -1.54 | 0.046 | 0.188 | 1     | 18 | tags=50%,<br>list=11%,<br>signal=54%   |
| WP_NRF2_PATHWAY                                | 6  | -0.62 | -1.53 | 0.046 | 0.194 | 1     | 17 | tags=50%,<br>list=10%,<br>signal=54%   |

|                                 |    |       |       |       |       |   |    |                                       |
|---------------------------------|----|-------|-------|-------|-------|---|----|---------------------------------------|
| HORIUCHI_WTAP_TARGETS_UP        | 11 | -0.5  | -1.53 | 0.046 | 0.192 | 1 | 69 | tags=82%,<br>list=42%,<br>signal=131% |
| FOROUTAN_INTEGRATED_TGFB_EMT_UP | 5  | -0.68 | -1.56 | 0.048 | 0.176 | 1 | 24 | tags=60%,<br>list=14%,<br>signal=68%  |
| BASAKI_YBX1_TARGETS_UP          | 5  | -0.65 | -1.5  | 0.048 | 0.21  | 1 | 46 | tags=80%,<br>list=28%,<br>signal=107% |
| JOHNSTONE_PARVB_TARGETS_3_UP    | 11 | -0.49 | -1.52 | 0.049 | 0.198 | 1 | 26 | tags=36%,<br>list=16%,<br>signal=40%  |

Supplementary Table 6: Reactome pathway analysis of 167 Common HRTPT cells exposed to iAs passage P3, P8, P10 Genes. \* indicates  $p < 0.05$ , \*\* indicates  $p < 0.01$ .

#### Analysis of 167 Common iAS P3, P8, P10 Genes

FGFR2 ligand binding and activation 8.93e-08\*\*  
 FGFR2 mutant receptor activation 2.05e-07 \*  
 Interleukin-10 signaling 2.05e-06 \*\*  
 SHC-mediated cascade: FGFR2 3.82e-06\*  
 Interleukin-4 and Interleukin-13 signaling 7.91e-06 \*\*  
 Activated point mutants of FGFR2 1.92e-05\*  
 Signaling by FGFR2 IIIa TM 4.40e- 05\*  
 FGFR2c ligand binding and activation 1.16e-04  
 Constitutive Signaling by Aberrant PI3K in Cancer 5.12e-04\*  
 Interleukin-18 signaling 7.08e-04 \*\*  
 Phospholipase C-mediated cascade; FGFR2 0.001\*  
 FGFR2b ligand binding and activation 0.001  
 Chemokine receptors bind chemokines 0.002  
 Signaling by FGFR2 amplification mutants 0.002\*  
 GRB2 events in ERBB2 signaling 0.002\*  
 Post-translational protein phosphorylation 0.002 \*\*  
 Signaling by FGFR2 in disease 0.003 \*  
 RAF/MAP kinase cascade 0.006\*  
 PI5P, PP2A and IER3 Regulate PI3K/AKT Signaling 0.011\*  
 FGFR3b ligand binding and activation 0.011  
 MAPK1/MAPK3 signaling 0.011  
 ERBB2 Regulates Cell Motility 0.011\*  
 Molecules associated with elastic fibres 0.013d  
 Negative regulation of the PI3K/AKT network 0.018\*  
 Signaling by FGFR in disease 0.018\*

#### Unique Pathways of 76 Down-regulated Genes Set

FGFR2c ligand binding and activation  
 ERBB2 Activates PTK6 Signaling  
 PI3K Cascade  
 FRS-mediated FGFR2 signaling  
 IRS-mediated signaling  
 Signaling by Insulin receptor  
 IRS-related events triggered by IGF1R  
 IGF1R signaling cascade  
 Signaling by Type 1 Insulin-like Growth Factor 1 Receptor (IGF1R)  
 SHC1 events in ERBB4 signaling

#### Unique Pathways of 91 Up-regulated Genes Set

Chemokine receptors bind chemokines 6.96e-05  
 Post-translational protein phosphorylation 9.99e-05  
 Senescence-Associated Secretory Phenotype (SASP) 0.002

Molecules associated with elastic fibres 0.003  
Heme degradation 0.004  
Peptide ligand-binding receptors 0.008  
Glucuronidation 0.008  
Regulation of Insulin-like Growth Factor (IGF) transport and uptake by Insulin-like Growth Factor Binding Proteins (IGFBPs) 0.008  
Alternative complement activation 0.009  
Elastic fibre formation 0.009  
Transcriptional activation of cell cycle inhibitor p21 0.011  
Transcriptional activation of p53 responsive genes 0.011  
Neutrophil degranulation 0.015  
RAF-independent MAPK1/3 activation 0.016  
Metabolism of porphyrins 0.023  
Aspirin ADME 0.025  
Basigin interactions 0.025  
Defective UGT1A4 causes hyperbilirubinemia 0.026  
Defective UGT1A1 causes hyperbilirubinemia 0.026  
Defective SLC40A1 causes hemochromatosis 4 (HFE4) (macrophages) 0.026  
Activation of C3 and C5 0.032

Supplementary Table 7A: Upregulated Gene Set Enrichment Analysis for significant genes between the control vs iAs+ with nominal p-value < 0.05.

| GS                                                                    | Size | ES   | NES  | NOM p-val | FDR q-val | FWER p-val | Rank at Max | Leading Edge                          |
|-----------------------------------------------------------------------|------|------|------|-----------|-----------|------------|-------------|---------------------------------------|
| <a href="#">REACTOME_ADAPTIVE_IMMUNE_SYSTEM</a>                       | 10   | 0.77 | 2.06 | 0         | 0.063     | 0.053      | 17          | tags=60%,<br>list=7%,<br>signal=62%   |
| <a href="#">SMID_BREAST_CANCER_NORMAL_LIKE_UP</a>                     | 12   | 0.72 | 2.05 | 0         | 0.037     | 0.063      | 36          | tags=67%,<br>list=15%,<br>signal=75%  |
| <a href="#">WP_NETWORK_MAP_OF_SARSCOV2_SIGNALING_PATHWAY</a>          | 18   | 0.62 | 1.96 | 0         | 0.087     | 0.205      | 69          | tags=72%,<br>list=29%,<br>signal=95%  |
| <a href="#">CREIGHTON_ENDOCRINE_THERAPY_RESISTANCE_3</a>              | 28   | 0.56 | 1.96 | 0         | 0.076     | 0.232      | 36          | tags=43%,<br>list=15%,<br>signal=45%  |
| <a href="#">HAN_JNK_SIGNALING_DN</a>                                  | 5    | 0.88 | 1.92 | 0         | 0.049     | 0.344      | 17          | tags=80%,<br>list=7%,<br>signal=84%   |
| <a href="#">REACTOME_CYTOKINE_SIGNALING_IN_IMMUNE_SYSTEM</a>          | 25   | 0.56 | 1.91 | 0         | 0.057     | 0.422      | 99          | tags=84%,<br>list=42%,<br>signal=130% |
| <a href="#">SENGUPTA_NASOPHARYNGEAL_CARCINOMA_WITH_LMP1_DN</a>        | 9    | 0.73 | 1.9  | 0         | 0.05      | 0.439      | 31          | tags=67%,<br>list=13%,<br>signal=74%  |
| <a href="#">REACTOME_INNATE_IMMUNE_SYSTEM</a>                         | 28   | 0.54 | 1.88 | 0         | 0.056     | 0.522      | 30          | tags=36%,<br>list=13%,<br>signal=36%  |
| REACTOME_SIGNALING_BY_INTERLEUKINS                                    | 17   | 0.6  | 1.84 | 0         | 0.075     | 0.749      | 43          | tags=53%,<br>list=18%,<br>signal=60%  |
| KEGG_COMPLEMENT_AND_COAGULATION_CASCADES                              | 5    | 0.84 | 1.78 | 0         | 0.091     | 0.95       | 25          | tags=80%,<br>list=11%,<br>signal=88%  |
| WP_ANTIVIRAL_AND_ANTIINFLAMMATORY_EFFECTS_OF_NRF2_ON_SARSCOV2_PATHWAY | 5    | 0.81 | 1.76 | 0         | 0.096     | 0.968      | 29          | tags=80%,<br>list=12%,<br>signal=89%  |
| REACTOME_COMPLEMENT_CASCADE                                           | 5    | 0.81 | 1.73 | 0         | 0.114     | 0.994      | 14          | tags=60%,<br>list=6%,<br>signal=62%   |
| <a href="#">HSIAO_LIVER_SPECIFIC_GENES</a>                            | 9    | 0.75 | 1.94 | 0.001     | 0.062     | 0.274      | 22          | tags=56%,<br>list=9%,<br>signal=59%   |
| <a href="#">COLINA_TARGETS_OF_4EBP1_AND_4EBP2</a>                     | 12   | 0.68 | 1.94 | 0.001     | 0.055     | 0.284      | 25          | tags=50%,<br>list=11%,<br>signal=53%  |
| <a href="#">GAURNIER_PSMD4_TARGETS</a>                                | 9    | 0.73 | 1.93 | 0.001     | 0.051     | 0.296      | 29          | tags=67%,<br>list=12%,<br>signal=73%  |
| <a href="#">SMID_BREAST_CANCER_LUMINAL_B_DN</a>                       | 28   | 0.55 | 1.93 | 0.001     | 0.046     | 0.302      | 69          | tags=61%,<br>list=29%,<br>signal=76%  |
| <a href="#">HARRIS_HYPOXIA</a>                                        | 9    | 0.73 | 1.9  | 0.001     | 0.049     | 0.456      | 29          | tags=67%,<br>list=12%,<br>signal=73%  |
| <a href="#">FOSTER_TOLERANT_MACROPHAGE_UP</a>                         | 8    | 0.75 | 1.87 | 0.001     | 0.059     | 0.575      | 28          | tags=63%,<br>list=12%,<br>signal=69%  |
| <a href="#">DELYS_THYROID_CANCER_UP</a>                               | 34   | 0.51 | 1.84 | 0.001     | 0.073     | 0.716      | 103         | tags=79%,<br>list=44%,<br>signal=121% |
| REACTOME_PEPTIDE_LIGAND_BINDING_RECEPTORS                             | 9    | 0.71 | 1.82 | 0.001     | 0.083     | 0.816      | 39          | tags=67%,<br>list=17%,<br>signal=77%  |
| KIM_GLI2_TARGETS_UP                                                   | 8    | 0.72 | 1.8  | 0.001     | 0.087     | 0.886      | 17          | tags=50%,<br>list=7%,<br>signal=52%   |
| <a href="#">HES2_TARGET_GENES</a>                                     | 32   | 0.55 | 1.96 | 0.001     | 0.157     | 0.187      | 45          | tags=44%,<br>list=19%,<br>signal=47%  |
| <a href="#">E2F5_TARGET_GENES</a>                                     | 6    | 0.78 | 1.76 | 0.001     | 1         | 0.945      | 38          | tags=83%,<br>list=16%,<br>signal=97%  |

|                                                                                                                                  |    |      |      |       |       |       |    |                                        |
|----------------------------------------------------------------------------------------------------------------------------------|----|------|------|-------|-------|-------|----|----------------------------------------|
| <a href="#">HALLMARK_EPITHELIAL_MESENCHYMAL_TRANSITION</a>                                                                       | 18 | 0.59 | 1.89 | 0.001 | 0.027 | 0.021 | 99 | tags=94%,<br>list=42%,<br>signal=151%  |
| IWANAGA_CARCIINOGENESIS_BY_KRAS_PTEN_UP                                                                                          | 5  | 0.83 | 1.81 | 0.002 | 0.087 | 0.878 | 25 | tags=80%,<br>list=11%,<br>signal=88%   |
| REACTOME_HEMOSTASIS                                                                                                              | 16 | 0.58 | 1.78 | 0.002 | 0.09  | 0.938 | 32 | tags=44%,<br>list=14%,<br>signal=47%   |
| REACTOME_MHC_CLASS_II_ANTIGEN_PRESENTATION                                                                                       | 5  | 0.82 | 1.76 | 0.002 | 0.097 | 0.975 | 17 | tags=80%,<br>list=7%,<br>signal=84%    |
| BOYLAN_MULTIPLE_MYELOMA_PCA1_UP                                                                                                  | 5  | 0.82 | 1.74 | 0.002 | 0.111 | 0.99  | 8  | tags=60%,<br>list=3%,<br>signal=61%    |
| <a href="#">LIANG_SILENCED_BY_METHYLATION_2</a>                                                                                  | 11 | 0.71 | 1.94 | 0.003 | 0.072 | 0.27  | 56 | tags=82%,<br>list=24%,<br>signal=103%  |
| <a href="#">WINZEN_DEGRADED_VIA_KHSRP</a>                                                                                        | 10 | 0.69 | 1.9  | 0.003 | 0.054 | 0.432 | 44 | tags=70%,<br>list=19%,<br>signal=83%   |
| REACTOME_INTERLEUKIN_4_AND_INTERLEUKIN_13_SIGNALING                                                                              | 8  | 0.73 | 1.83 | 0.003 | 0.081 | 0.794 | 29 | tags=63%,<br>list=12%,<br>signal=69%   |
| BLANCO_MELO_COVID19_SARS_COV_2_INFECTION_A594_CELLS_UP                                                                           | 5  | 0.81 | 1.76 | 0.003 | 0.097 | 0.975 | 29 | tags=80%,<br>list=12%,<br>signal=89%   |
| REACTOME_CELL_SURFACE_INTERACTIONS_AT_THE_VASCULAR_WALL                                                                          | 8  | 0.7  | 1.72 | 0.003 | 0.111 | 0.995 | 32 | tags=63%,<br>list=14%,<br>signal=70%   |
| JAATINEN_HEMATOPOIETIC_STEM_CELL_DN                                                                                              | 5  | 0.77 | 1.65 | 0.003 | 0.169 | 1     | 12 | tags=60%,<br>list=5%,<br>signal=62%    |
| <a href="#">HORIUCHI_WTAP_TARGETS_UP</a>                                                                                         | 10 | 0.7  | 1.88 | 0.004 | 0.055 | 0.537 | 76 | tags=100%,<br>list=32%,<br>signal=142% |
| <a href="#">JINESH_BLEBBISTATIN_A_VS_LIVE_CONTROL_DN</a>                                                                         | 21 | 0.57 | 1.84 | 0.004 | 0.076 | 0.712 | 80 | tags=71%,<br>list=34%,<br>signal=99%   |
| REACTOME_CLASS_A_1_RHODOPSIN_LIKE_RECEPTORS                                                                                      | 9  | 0.71 | 1.81 | 0.004 | 0.089 | 0.871 | 39 | tags=67%,<br>list=17%,<br>signal=77%   |
| SENESE_HDAC1_AND_HDAC2_TARGETS_UP                                                                                                | 14 | 0.62 | 1.79 | 0.004 | 0.088 | 0.922 | 67 | tags=71%,<br>list=29%,<br>signal=94%   |
| CHIANG_LIVER_CANCER_SUBCLASS_CTNNB1_DN                                                                                           | 9  | 0.7  | 1.78 | 0.004 | 0.092 | 0.946 | 45 | tags=78%,<br>list=19%,<br>signal=93%   |
| RICKMAN_HEAD_AND_NECK_CANCER_E                                                                                                   | 8  | 0.7  | 1.78 | 0.004 | 0.092 | 0.956 | 31 | tags=63%,<br>list=13%,<br>signal=70%   |
| REACTOME_REGULATION_OF_INSULIN_LIKE_GROWTH_FACTOR_IGF_TRANSPORT_AND_UPTAKE_BY_INSULIN_LIKE_GROWTH_FACTOR_BINDING_PROTEINS_IGFBPS | 8  | 0.72 | 1.77 | 0.004 | 0.09  | 0.958 | 71 | tags=100%,<br>list=30%,<br>signal=139% |
| <a href="#">REACTOME_G_ALPHA_1_SIGNALING_EVENTS</a>                                                                              | 9  | 0.73 | 1.85 | 0.005 | 0.076 | 0.693 | 26 | tags=56%,<br>list=11%,<br>signal=60%   |
| BIOCARTA_INFLAM_PATHWAY                                                                                                          | 5  | 0.83 | 1.8  | 0.005 | 0.086 | 0.898 | 43 | tags=100%,<br>list=18%,<br>signal=120% |
| BLANCO_MELO_RESPIRATORY_SYNCYTIAL_VIRUS_INFECTION_A594_CELLS_UP                                                                  | 17 | 0.58 | 1.79 | 0.005 | 0.09  | 0.935 | 86 | tags=82%,<br>list=37%,<br>signal=121%  |
| BOQUEST_STEM_CELL_DN                                                                                                             | 10 | 0.64 | 1.71 | 0.005 | 0.124 | 0.999 | 48 | tags=60%,<br>list=21%,<br>signal=72%   |
| BLANCO_MELO_COVID19_BRONCHIAL_EPITHELIAL_CELLS_SARS_COV_2_INFECTION_UP                                                           | 18 | 0.58 | 1.82 | 0.006 | 0.088 | 0.846 | 76 | tags=72%,<br>list=32%,<br>signal=99%   |
| GRAESSMANN_APOPTOSIS_BY_SERUM_DEPRIVATION_UP                                                                                     | 18 | 0.56 | 1.73 | 0.006 | 0.113 | 0.994 | 85 | tags=78%,<br>list=36%,<br>signal=113%  |
| WINTER_HYPOXIA_METAGENE                                                                                                          | 14 | 0.59 | 1.73 | 0.006 | 0.111 | 0.994 | 71 | tags=71%,<br>list=30%,<br>signal=96%   |

|                                                                   |    |      |      |       |       |       |     |                                        |
|-------------------------------------------------------------------|----|------|------|-------|-------|-------|-----|----------------------------------------|
| WP_COMPLEMENT_SYSTEM                                              | 5  | 0.79 | 1.69 | 0.006 | 0.133 | 1     | 14  | tags=60%,<br>list=6%,<br>signal=62%    |
| BLANCO_MELO_BETA_INTERFERON_TREATED_BRONCHIAL_EPITHELIAL_CELLS_UP | 21 | 0.54 | 1.75 | 0.007 | 0.104 | 0.979 | 80  | tags=76%,<br>list=34%,<br>signal=105%  |
| JINESH_BLEBBISHIELD_TO_IMMUNE_CELL_FUSION_PBSHMS_DN               | 26 | 0.49 | 1.66 | 0.007 | 0.167 | 1     | 56  | tags=46%,<br>list=24%,<br>signal=54%   |
| NABA_MATRISOME                                                    | 33 | 0.47 | 1.65 | 0.007 | 0.167 | 1     | 73  | tags=55%,<br>list=31%,<br>signal=68%   |
| PILON_KLF1_TARGETS_UP                                             | 9  | 0.69 | 1.81 | 0.008 | 0.091 | 0.862 | 24  | tags=44%,<br>list=10%,<br>signal=48%   |
| POOLA_INVASIVE_BREAST_CANCER_UP                                   | 10 | 0.66 | 1.74 | 0.008 | 0.108 | 0.985 | 40  | tags=60%,<br>list=17%,<br>signal=69%   |
| <a href="#">HALLMARK_COAGULATION</a>                              | 10 | 0.65 | 1.75 | 0.008 | 0.073 | 0.106 | 31  | tags=50%,<br>list=13%,<br>signal=55%   |
| DODD_NASOPHARYNGEAL_CARCINOMA_UP                                  | 42 | 0.46 | 1.71 | 0.009 | 0.12  | 0.999 | 105 | tags=71%,<br>list=45%,<br>signal=106%  |
| LEE_LIVER_CANCER_E2F1_UP                                          | 5  | 0.77 | 1.67 | 0.009 | 0.152 | 1     | 17  | tags=60%,<br>list=7%,<br>signal=63%    |
| MARTINEZ_TP53_TARGETS_UP                                          | 18 | 0.57 | 1.79 | 0.01  | 0.09  | 0.92  | 19  | tags=33%,<br>list=8%,<br>signal=33%    |
| NABA_MATRISOME_ASSOCIATED                                         | 24 | 0.53 | 1.76 | 0.01  | 0.096 | 0.972 | 73  | tags=63%,<br>list=31%,<br>signal=82%   |
| MARTINEZ_RB1_AND_TP53_TARGETS_UP                                  | 19 | 0.55 | 1.73 | 0.01  | 0.111 | 0.992 | 19  | tags=32%,<br>list=8%,<br>signal=32%    |
| WP_ALLOGRAFT_REJECTION                                            | 6  | 0.75 | 1.72 | 0.01  | 0.115 | 0.998 | 48  | tags=83%,<br>list=21%,<br>signal=102%  |
| <a href="#">HALLMARK_TNFA_SIGNALING_VIA_NFKB</a>                  | 18 | 0.55 | 1.73 | 0.01  | 0.061 | 0.129 | 99  | tags=89%,<br>list=42%,<br>signal=142%  |
| <a href="#">MIR3671</a>                                           | 7  | 0.71 | 1.67 | 0.011 | 1     | 0.997 | 47  | tags=71%,<br>list=20%,<br>signal=87%   |
| MCLACHLAN_DENTAL_CARIES_UP                                        | 23 | 0.53 | 1.75 | 0.013 | 0.104 | 0.982 | 55  | tags=52%,<br>list=24%,<br>signal=62%   |
| NAKAMURA_TUMOR_ZONE_PERIPHERAL_VS_CENTRAL_DN                      | 23 | 0.51 | 1.66 | 0.013 | 0.165 | 1     | 53  | tags=43%,<br>list=23%,<br>signal=51%   |
| WP_COMPLEMENT_AND_COAGULATION_CASCADES                            | 5  | 0.75 | 1.64 | 0.013 | 0.177 | 1     | 25  | tags=60%,<br>list=11%,<br>signal=66%   |
| HALMOS_CEBPA_TARGETS_UP                                           | 6  | 0.73 | 1.64 | 0.013 | 0.175 | 1     | 67  | tags=100%,<br>list=29%,<br>signal=137% |
| THUM_SYSTOLIC_HEART_FAILURE_UP                                    | 17 | 0.56 | 1.75 | 0.014 | 0.103 | 0.979 | 53  | tags=53%,<br>list=23%,<br>signal=63%   |
| ALTEMEIER_RESPONSE_TO_LPS_WITH_MECHANICAL_VENTILATION             | 12 | 0.61 | 1.7  | 0.014 | 0.12  | 0.999 | 80  | tags=83%,<br>list=34%,<br>signal=120%  |
| GRAESSMANN_APOPTOSIS_BY_DOXORUBICIN_UP                            | 30 | 0.48 | 1.66 | 0.014 | 0.167 | 1     | 106 | tags=80%,<br>list=45%,<br>signal=128%  |
| REACTOME_GPCR_LIGAND_BINDING                                      | 13 | 0.59 | 1.73 | 0.015 | 0.108 | 0.995 | 44  | tags=54%,<br>list=19%,<br>signal=63%   |
| WP_OVERVIEW_OF_PROINFLAMMATORY_AND_PROFIBROTIC_MEDIATORS          | 8  | 0.67 | 1.7  | 0.015 | 0.122 | 0.999 | 69  | tags=88%,<br>list=29%,<br>signal=120%  |
| IGLESIAS_E2F_TARGETS_UP                                           | 5  | 0.76 | 1.63 | 0.015 | 0.175 | 1     | 17  | tags=60%,<br>list=7%,<br>signal=63%    |
| <a href="#">MIR493_5P</a>                                         | 5  | 0.74 | 1.6  | 0.015 | 1     | 1     | 26  | tags=60%,<br>list=11%,<br>signal=66%   |



|                                                                                |    |      |      |       |       |       |     |                                        |
|--------------------------------------------------------------------------------|----|------|------|-------|-------|-------|-----|----------------------------------------|
| BLANCO_MELO_COVID19_SARS_COV_2_INFECTION_A594_ACE2_EXPRESSING_CELLS_UP         | 15 | 0.58 | 1.73 | 0.016 | 0.11  | 0.995 | 69  | tags=73%,<br>list=29%,<br>signal=97%   |
| LEE_LIVER_CANCER_CIPROFIBRATE_UP                                               | 7  | 0.68 | 1.66 | 0.018 | 0.169 | 1     | 13  | tags=43%,<br>list=6%,<br>signal=44%    |
| LIN_SILENCED_BY_TUMOR_MICROENVIRONMENT                                         | 9  | 0.63 | 1.65 | 0.018 | 0.17  | 1     | 42  | tags=56%,<br>list=18%,<br>signal=65%   |
| SENGUPTA_NASOPHARYNGEAL_CARCINOMA_DN                                           | 12 | 0.57 | 1.63 | 0.018 | 0.175 | 1     | 69  | tags=67%,<br>list=29%,<br>signal=90%   |
| LINDSTEDT_DENDRITIC_CELL_MATURATION_A                                          | 7  | 0.67 | 1.62 | 0.018 | 0.193 | 1     | 29  | tags=57%,<br>list=12%,<br>signal=63%   |
| CAIRO_LIVER_DEVELOPMENT_DN                                                     | 8  | 0.66 | 1.61 | 0.018 | 0.19  | 1     | 32  | tags=50%,<br>list=14%,<br>signal=56%   |
| ONDER_CDHI_TARGETS_2_DN                                                        | 39 | 0.43 | 1.59 | 0.018 | 0.209 | 1     | 102 | tags=67%,<br>list=44%,<br>signal=98%   |
| ONDER_CDHI_TARGETS_1_DN                                                        | 16 | 0.56 | 1.69 | 0.019 | 0.135 | 1     | 83  | tags=75%,<br>list=35%,<br>signal=108%  |
| REACTOME_INTERLEUKIN_10_SIGNALING                                              | 7  | 0.69 | 1.6  | 0.019 | 0.203 | 1     | 43  | tags=71%,<br>list=18%,<br>signal=85%   |
| LEE_LIVER_CANCER_DENA_UP                                                       | 5  | 0.72 | 1.56 | 0.019 | 0.226 | 1     | 5   | tags=40%,<br>list=2%,<br>signal=40%    |
| BOSCO_EPITHELIAL_DIFFERENTIATION_MODULE                                        | 8  | 0.66 | 1.64 | 0.02  | 0.173 | 1     | 30  | tags=50%,<br>list=13%,<br>signal=55%   |
| BLANCO_MELO_COVID19_SARS_COV_2_LOW_MOI_INFECTION_A594_ACE2_EXPRESSING_CELLS_UP | 7  | 0.66 | 1.61 | 0.02  | 0.191 | 1     | 69  | tags=86%,<br>list=29%,<br>signal=118%  |
| <a href="#">HALLMARK_COMPLEMENT</a>                                            | 13 | 0.56 | 1.61 | 0.02  | 0.11  | 0.345 | 29  | tags=38%,<br>list=12%,<br>signal=41%   |
| KEGG_LEISHMANIA_INFECTION                                                      | 5  | 0.76 | 1.64 | 0.021 | 0.171 | 1     | 15  | tags=60%,<br>list=6%,<br>signal=63%    |
| DAZARD_RESPONSE_TO_UV_NHEK_UP                                                  | 11 | 0.58 | 1.62 | 0.021 | 0.192 | 1     | 69  | tags=73%,<br>list=29%,<br>signal=98%   |
| WP_SARSCOV2_INNATE_IMMUNITY_EVASION_AND_CELLSPECIFIC_IMMUNE_RESPONSE           | 6  | 0.72 | 1.64 | 0.022 | 0.177 | 1     | 69  | tags=100%,<br>list=29%,<br>signal=138% |
| WP_CYTOKINES_AND_INFLAMMATORY_RESPONSE                                         | 5  | 0.73 | 1.58 | 0.022 | 0.208 | 1     | 43  | tags=80%,<br>list=18%,<br>signal=96%   |
| PICCALUGA_ANGIOIMMUNOBLASTIC_LYMPHOMA_UP                                       | 6  | 0.69 | 1.58 | 0.022 | 0.209 | 1     | 14  | tags=50%,<br>list=6%,<br>signal=52%    |
| ZHOU_INFLAMMATORY_RESPONSE_LIVE_UP                                             | 22 | 0.5  | 1.63 | 0.023 | 0.177 | 1     | 102 | tags=82%,<br>list=44%,<br>signal=131%  |
| PLASARI_TGFB1_TARGETS_10HR_UP                                                  | 12 | 0.57 | 1.61 | 0.023 | 0.196 | 1     | 87  | tags=83%,<br>list=37%,<br>signal=126%  |
| PHONG_TNF_RESPONSE_VIA_P38_PARTIAL                                             | 15 | 0.54 | 1.6  | 0.023 | 0.202 | 1     | 99  | tags=87%,<br>list=42%,<br>signal=141%  |
| SCHUETZ_BREAST_CANCER_DUCTAL_INVASIVE_UP                                       | 22 | 0.51 | 1.67 | 0.024 | 0.157 | 1     | 53  | tags=50%,<br>list=23%,<br>signal=59%   |
| BOQUEST_STEM_CELL_UP                                                           | 9  | 0.61 | 1.58 | 0.024 | 0.21  | 1     | 25  | tags=44%,<br>list=11%,<br>signal=48%   |
| HUPER_BREAST_BASAL_VS_LUMINAL_DN                                               | 7  | 0.66 | 1.58 | 0.024 | 0.21  | 1     | 53  | tags=71%,<br>list=23%,<br>signal=90%   |
| TENEDINI_MEGAKARYOCYTE_MARKERS                                                 | 7  | 0.64 | 1.56 | 0.024 | 0.229 | 1     | 36  | tags=57%,<br>list=15%,<br>signal=66%   |
| <a href="#">MIR33A_3P</a>                                                      | 5  | 0.73 | 1.55 | 0.024 | 1     | 1     | 28  | tags=60%,<br>list=12%,<br>signal=67%   |

|                                                             |    |      |      |       |       |       |     |                                        |
|-------------------------------------------------------------|----|------|------|-------|-------|-------|-----|----------------------------------------|
| HINATA_NFKB_TARGETS_FIBROBLAST_UP                           | 10 | 0.61 | 1.64 | 0.025 | 0.177 | 1     | 76  | tags=80%,<br>list=32%,<br>signal=113%  |
| NAKAMURA_TUMOR_ZONE_PERIPHERAL_VS_CENTRAL_UP                | 10 | 0.6  | 1.58 | 0.025 | 0.209 | 1     | 25  | tags=40%,<br>list=11%,<br>signal=43%   |
| SWEET_LUNG_CANCER_KRAS_DN                                   | 10 | 0.61 | 1.62 | 0.026 | 0.186 | 1     | 8   | tags=30%,<br>list=3%,<br>signal=30%    |
| SMID_BREAST_CANCER_BASAL_UP                                 | 26 | 0.47 | 1.6  | 0.026 | 0.203 | 1     | 76  | tags=58%,<br>list=32%,<br>signal=76%   |
| REACTOME_CHEMOKINE_RECEPTORS_BINDING_CHEMOKINES             | 5  | 0.72 | 1.55 | 0.026 | 0.23  | 1     | 26  | tags=60%,<br>list=11%,<br>signal=66%   |
| <a href="#">ZSCAN2_TARGET_GENES</a>                         | 9  | 0.63 | 1.63 | 0.026 | 1     | 1     | 14  | tags=33%,<br>list=6%,<br>signal=34%    |
| <a href="#">MIR3529_3P</a>                                  | 5  | 0.73 | 1.57 | 0.026 | 1     | 1     | 31  | tags=60%,<br>list=13%,<br>signal=68%   |
| CHIARADONNA_NEOPLASTIC_TRANSFORMATION_CDC25_UP              | 6  | 0.7  | 1.57 | 0.027 | 0.217 | 1     | 43  | tags=67%,<br>list=18%,<br>signal=80%   |
| MISSIAGLIA_REGULATED_BY_METHYLATION_UP                      | 13 | 0.57 | 1.65 | 0.028 | 0.166 | 1     | 106 | tags=100%,<br>list=45%,<br>signal=173% |
| HELLER_SILENCED_BY_METHYLATION_UP                           | 14 | 0.54 | 1.57 | 0.029 | 0.219 | 1     | 56  | tags=57%,<br>list=24%,<br>signal=71%   |
| NAKAYAMA_SOFT_TISSUE_TUMORS_PCA1_UP                         | 6  | 0.69 | 1.54 | 0.029 | 0.237 | 1     | 14  | tags=50%,<br>list=6%,<br>signal=52%    |
| KEGG_CYTOKINE_CYTOKINE_RECEPTOR_INTERACTION                 | 12 | 0.59 | 1.62 | 0.03  | 0.185 | 1     | 43  | tags=50%,<br>list=18%,<br>signal=58%   |
| HINATA_NFKB_TARGETS KERATINOCYTE_UP                         | 11 | 0.57 | 1.59 | 0.03  | 0.209 | 1     | 76  | tags=73%,<br>list=32%,<br>signal=103%  |
| NUYTEN_EZH2_TARGETS_UP                                      | 40 | 0.42 | 1.55 | 0.031 | 0.231 | 1     | 99  | tags=65%,<br>list=42%,<br>signal=93%   |
| WP_CHEMOKINE_SIGNALING_PATHWAY                              | 5  | 0.7  | 1.51 | 0.031 | 0.266 | 1     | 5   | tags=40%,<br>list=2%,<br>signal=40%    |
| GRAHAM_CML_QUIESCENT_VS_CML_DIVIDING_UP                     | 5  | 0.69 | 1.49 | 0.031 | 0.276 | 1     | 76  | tags=100%,<br>list=32%,<br>signal=145% |
| NABA_SECRETED_FACTORS                                       | 13 | 0.56 | 1.61 | 0.032 | 0.197 | 1     | 73  | tags=69%,<br>list=31%,<br>signal=95%   |
| SABATES_COLORECTAL_ADENOMA_UP                               | 11 | 0.57 | 1.57 | 0.032 | 0.221 | 1     | 26  | tags=36%,<br>list=11%,<br>signal=39%   |
| MAHAJAN_RESPONSE_TO_IL1A_UP                                 | 6  | 0.69 | 1.57 | 0.033 | 0.22  | 1     | 76  | tags=100%,<br>list=32%,<br>signal=144% |
| <a href="#">HALLMARK_ALLOGRAFT_REJECTION</a>                | 7  | 0.67 | 1.62 | 0.034 | 0.134 | 0.334 | 48  | tags=71%,<br>list=21%,<br>signal=87%   |
| IVANOVA_HEMATOPOIESIS_MATURE_CELL                           | 6  | 0.66 | 1.52 | 0.035 | 0.261 | 1     | 5   | tags=33%,<br>list=2%,<br>signal=33%    |
| WP_COMPLEMENT_SYSTEM_IN_NEURONAL_DEVELOPMENT_AND_PLASTICITY | 7  | 0.67 | 1.59 | 0.036 | 0.206 | 1     | 14  | tags=43%,<br>list=6%,<br>signal=44%    |
| ZWANG_TRANSIENTLY_UP_BY_2ND_EGF_PULSE_ONLY                  | 19 | 0.49 | 1.56 | 0.036 | 0.231 | 1     | 42  | tags=42%,<br>list=18%,<br>signal=47%   |
| ONDER_CDH1_TARGETS_3_DN                                     | 11 | 0.58 | 1.59 | 0.037 | 0.21  | 1     | 83  | tags=82%,<br>list=35%,<br>signal=121%  |
| ICHIBA_GRAFT_VERSUS_HOST_DISEASE_35D_UP                     | 6  | 0.67 | 1.54 | 0.038 | 0.238 | 1     | 80  | tags=100%,<br>list=34%,<br>signal=148% |
| <a href="#">ZNF318_TARGET_GENES</a>                         | 7  | 0.65 | 1.59 | 0.038 | 1     | 1     | 51  | tags=71%,<br>list=22%,<br>signal=89%   |

|                                                       |    |      |      |       |       |       |     |                                        |
|-------------------------------------------------------|----|------|------|-------|-------|-------|-----|----------------------------------------|
| BROWN_MYELOID_CELL_DEVELOPMENT_UP                     | 6  | 0.68 | 1.55 | 0.039 | 0.232 | 1     | 2   | tags=33%,<br>list=1%,<br>signal=33%    |
| SANA_TNF_SIGNALING_UP                                 | 10 | 0.59 | 1.61 | 0.04  | 0.191 | 1     | 76  | tags=80%,<br>list=32%,<br>signal=113%  |
| ANDERSEN_CHOLANGIOCARCINOMA_CLASS2                    | 17 | 0.51 | 1.56 | 0.04  | 0.226 | 1     | 102 | tags=82%,<br>list=44%,<br>signal=135%  |
| <a href="#">HALLMARK_INTERFERON_GAMMA_RESPONSE</a>    | 12 | 0.55 | 1.55 | 0.04  | 0.12  | 0.477 | 56  | tags=58%,<br>list=24%,<br>signal=73%   |
| GRAESSMANN_RESPONSE_TO_MC_AND_SERUM_DEPRIVATION_UP    | 11 | 0.56 | 1.53 | 0.041 | 0.259 | 1     | 80  | tags=73%,<br>list=34%,<br>signal=105%  |
| LEE_LIVER_CANCER_ACOX1_UP                             | 6  | 0.67 | 1.56 | 0.042 | 0.228 | 1     | 45  | tags=67%,<br>list=19%,<br>signal=80%   |
| REACTOME_POST_TRANSLATIONAL_PROTEIN_MODIFICATION      | 25 | 0.47 | 1.58 | 0.043 | 0.21  | 1     | 71  | tags=52%,<br>list=30%,<br>signal=67%   |
| WP_IL18_SIGNALING_PATHWAY                             | 14 | 0.53 | 1.55 | 0.043 | 0.229 | 1     | 29  | tags=36%,<br>list=12%,<br>signal=38%   |
| SATO_SILENCED_BY_METHYLATION_IN_PANCREATIC_CANCER_1   | 23 | 0.48 | 1.59 | 0.044 | 0.208 | 1     | 56  | tags=48%,<br>list=24%,<br>signal=57%   |
| HOSHIDA_LIVER_CANCER_SUBCLASS_S3                      | 10 | 0.56 | 1.53 | 0.044 | 0.258 | 1     | 45  | tags=50%,<br>list=19%,<br>signal=59%   |
| SMIRNOV_CIRCULATING_ENDOTHELIOCYTES_IN_CANCER_UP      | 11 | 0.55 | 1.49 | 0.044 | 0.282 | 1     | 26  | tags=36%,<br>list=11%,<br>signal=39%   |
| BILD_HRAS_ONCOGENIC_SIGNATURE                         | 17 | 0.52 | 1.6  | 0.045 | 0.2   | 1     | 83  | tags=71%,<br>list=35%,<br>signal=101%  |
| JINESH_BLEBBISTHIED_TRANSFORMED_STEM_CELLS_SPHERES_UP | 13 | 0.53 | 1.54 | 0.045 | 0.246 | 1     | 99  | tags=85%,<br>list=42%,<br>signal=139%  |
| SWEET_KRAS_TARGETS_DN                                 | 5  | 0.69 | 1.51 | 0.045 | 0.268 | 1     | 75  | tags=100%,<br>list=32%,<br>signal=144% |
| LENAOUR_DENDRITIC_CELL_MATURATION_UP                  | 6  | 0.63 | 1.47 | 0.045 | 0.29  | 1     | 71  | tags=83%,<br>list=30%,<br>signal=117%  |
| <a href="#">HALLMARK_INFLAMMATORY_RESPONSE</a>        | 14 | 0.53 | 1.55 | 0.045 | 0.138 | 0.471 | 43  | tags=43%,<br>list=18%,<br>signal=49%   |
| ZHOU_INFLAMMATORY_RESPONSE_FIMA_UP                    | 20 | 0.48 | 1.52 | 0.046 | 0.262 | 1     | 69  | tags=55%,<br>list=29%,<br>signal=71%   |
| ROZANOV_MMP14_TARGETS_UP                              | 11 | 0.54 | 1.52 | 0.046 | 0.261 | 1     | 56  | tags=55%,<br>list=24%,<br>signal=68%   |
| <a href="#">MIR3119</a>                               | 7  | 0.63 | 1.52 | 0.046 | 1     | 1     | 46  | tags=57%,<br>list=20%,<br>signal=69%   |
| KEGG_HEMATOPOIETIC_CELL_LINEAGE                       | 9  | 0.61 | 1.56 | 0.047 | 0.229 | 1     | 43  | tags=56%,<br>list=18%,<br>signal=65%   |
| GERY_CEBP_TARGETS                                     | 7  | 0.65 | 1.54 | 0.047 | 0.24  | 1     | 24  | tags=43%,<br>list=10%,<br>signal=46%   |
| DAZARD_RESPONSE_TO_UV_SCC_UP                          | 6  | 0.66 | 1.52 | 0.047 | 0.26  | 1     | 69  | tags=83%,<br>list=29%,<br>signal=115%  |
| ZHONG_SECRETOME_OF_LUNG_CANCER_AND_MACROPHAGE         | 5  | 0.69 | 1.51 | 0.047 | 0.272 | 1     | 14  | tags=40%,<br>list=6%,<br>signal=42%    |
| <a href="#">DLX2_TARGET_GENES</a>                     | 7  | 0.63 | 1.54 | 0.047 | 1     | 1     | 24  | tags=43%,<br>list=10%,<br>signal=46%   |
| ICHIBA_GRAFT_VERSUS_HOST_DISEASE_D7_UP                | 7  | 0.63 | 1.49 | 0.049 | 0.274 | 1     | 17  | tags=43%,<br>list=7%,<br>signal=45%    |

Supplementary Table 7B: Downregulated Gene Set Enrichment Analysis for significant genes between the control vs iAs+ with nominal p-value < 0.05.

| GS                                                                    | Size | ES    | NES   | NOM p-val | FDR q-val | FWER p-val | Rank at Max | Leading Edge                     |
|-----------------------------------------------------------------------|------|-------|-------|-----------|-----------|------------|-------------|----------------------------------|
| BLANCO_MELO_COVID19_BRONCHIAL_EPITHELIAL_CELL_SARS_COV_2_INFECTION_DN | 5    | -0.83 | -2.05 | 0         | 0.307     | 0.404      | 45          | tags=100%, list=19%, signal=121% |
| YTATTTNR_MEF2_02                                                      | 13   | -0.58 | -2.25 | 0         | 0.089     | 0.054      | 24          | tags=46%, list=10%, signal=49%   |
| AAAYRNCTG_UNKNOWN                                                     | 8    | -0.68 | -2.09 | 0         | 0.231     | 0.248      | 23          | tags=63%, list=10%, signal=67%   |
| HNF1_C                                                                | 7    | -0.71 | -2.09 | 0         | 0.16      | 0.256      | 20          | tags=57%, list=9%, signal=61%    |
| YCATTAA_UNKNOWN                                                       | 14   | -0.54 | -2.07 | 0         | 0.146     | 0.295      | 11          | tags=36%, list=5%, signal=35%    |
| GGATTA_PITX2_Q2                                                       | 9    | -0.64 | -2.01 | 0         | 0.182     | 0.413      | 8           | tags=33%, list=3%, signal=33%    |
| GATA4_Q3                                                              | 5    | -0.81 | -2    | 0         | 0.168     | 0.437      | 24          | tags=80%, list=10%, signal=87%   |
| GATA_Q6                                                               | 6    | -0.72 | -1.95 | 0.003     | 0.194     | 0.596      | 24          | tags=67%, list=10%, signal=72%   |
| MEF2_02                                                               | 5    | -0.7  | -1.76 | 0.003     | 0.392     | 0.975      | 32          | tags=80%, list=14%, signal=91%   |
| E4BP4_01                                                              | 5    | -0.7  | -1.71 | 0.003     | 0.435     | 0.993      | 15          | tags=60%, list=6%, signal=63%    |
| PCGF2_TARGET_GENES                                                    | 11   | -0.57 | -1.97 | 0.004     | 0.179     | 0.518      | 56          | tags=73%, list=24%, signal=91%   |
| CEBP_01                                                               | 7    | -0.65 | -1.9  | 0.004     | 0.262     | 0.757      | 15          | tags=43%, list=6%, signal=44%    |
| CTTTAAR_UNKNOWN                                                       | 19   | -0.4  | -1.8  | 0.006     | 0.351     | 0.938      | 57          | tags=58%, list=24%, signal=70%   |
| PECE_MAMMARY_STEM_CELL_DN                                             | 7    | -0.61 | -1.79 | 0.007     | 1         | 0.972      | 97          | tags=100%, list=41%, signal=166% |
| MIR3646                                                               | 10   | -0.57 | -1.89 | 0.008     | 0.243     | 0.771      | 17          | tags=50%, list=7%, signal=52%    |
| ZNF843_TARGET_GENES                                                   | 14   | -0.47 | -1.83 | 0.012     | 0.314     | 0.902      | 56          | tags=64%, list=24%, signal=79%   |
| CONCANNON_APOPTOSIS_BY_EPOXOMICIN_DN                                  | 5    | -0.69 | -1.75 | 0.015     | 0.85      | 0.986      | 45          | tags=80%, list=19%, signal=97%   |
| EVII_02                                                               | 5    | -0.66 | -1.67 | 0.015     | 0.544     | 1          | 24          | tags=60%, list=10%, signal=65%   |
| AAGCAAT_MIR137                                                        | 8    | -0.63 | -1.89 | 0.017     | 0.226     | 0.779      | 31          | tags=63%, list=13%, signal=70%   |
| P53_02                                                                | 8    | -0.56 | -1.73 | 0.018     | 0.42      | 0.99       | 21          | tags=50%, list=9%, signal=53%    |
| STAT4_01                                                              | 6    | -0.65 | -1.77 | 0.02      | 0.398     | 0.967      | 56          | tags=83%, list=24%, signal=107%  |
| RTAAACA_FREAC2_01                                                     | 12   | -0.5  | -1.75 | 0.021     | 0.387     | 0.98       | 30          | tags=50%, list=13%, signal=54%   |
| PEDERSEN_METASTASIS_BY_ERBB2_ISOFORM_7                                | 12   | -0.42 | -1.56 | 0.023     | 1         | 1          | 142         | tags=100%, list=61%, signal=241% |
| TAATTA_CHX10_01                                                       | 15   | -0.38 | -1.56 | 0.023     | 0.633     | 1          | 32          | tags=47%, list=14%, signal=51%   |
| HNF1_01                                                               | 8    | -0.54 | -1.66 | 0.028     | 0.552     | 1          | 22          | tags=50%, list=9%, signal=53%    |
| REACTOME_NEURONAL_SYSTEM                                              | 6    | -0.61 | -1.66 | 0.032     | 1         | 0.999      | 28          | tags=50%, list=12%, signal=55%   |
| REACTOME_METABOLISM_OF_LIPIDS                                         | 15   | -0.4  | -1.57 | 0.032     | 1         | 1          | 147         | tags=100%, list=63%, signal=252% |
| CEBPA_01                                                              | 6    | -0.6  | -1.62 | 0.034     | 0.62      | 1          | 32          | tags=50%, list=14%, signal=56%   |
| WGGAATGY_TEF1_Q6                                                      | 11   | -0.46 | -1.6  | 0.037     | 0.611     | 1          | 21          | tags=36%, list=9%, signal=38%    |
| MIR3934_3P                                                            | 6    | -0.58 | -1.58 | 0.037     | 0.636     | 1          | 102         | tags=100%, list=44%, signal=173% |
| MIR8068                                                               | 6    | -0.58 | -1.6  | 0.039     | 0.625     | 1          | 102         | tags=100%, list=44%, signal=173% |

|                     |   |       |       |       |       |   |     |                                        |
|---------------------|---|-------|-------|-------|-------|---|-----|----------------------------------------|
| YATTNATC_UNKNOWN    | 8 | -0.52 | -1.62 | 0.042 | 0.599 | 1 | 15  | tags=38%, list=6%,<br>signal=39%       |
| PAX7_TARGET_GENES   | 6 | -0.56 | -1.53 | 0.042 | 0.649 | 1 | 19  | tags=33%, list=8%,<br>signal=35%       |
| ARID5B_TARGET_GENES | 6 | -0.58 | -1.58 | 0.043 | 0.616 | 1 | 103 | tags=100%,<br>list=44%,<br>signal=174% |

Supplementary Table 8: Ingenuity Pathway Analysis performed on 234 genes from Supplementary

Table 4.

| © 2000-2022 QIAGEN. All rights reserved.        |               |        |                                                                                                                                                                                                                                                                        |
|-------------------------------------------------|---------------|--------|------------------------------------------------------------------------------------------------------------------------------------------------------------------------------------------------------------------------------------------------------------------------|
| Ingenuity Canonical Pathways                    | -log(p-value) | Ratio  | Molecules                                                                                                                                                                                                                                                              |
| EIF2 Signaling                                  | 16.7          | 0.159  | ACTB, CCND1, EIF3C, EIF4A1, EIF4G2, PPP1CA, RNA18SN5, RNA28SN5, RNA5-8SN5, RPL17, RPL28, RPL3, RPL30, RPL31, RPL35, RPL38, RPL7, RPL8, RPLP0, RPLP1, RPLP2, RPS11, RPS12, RPS15, RPS17, RPS18, RPS19, RPS2, RPS20, RPS24, RPS25, RPS26, RPSA, UBA52, VEGFA, WAR S1     |
| Phagosome Maturation                            | 10.9          | 0.152  | ATP6V0C, ATP6V0D1, ATP6V0E1, ATP6V1E1, CTSE, CTSE, CTSE, DYNCL1H1, DYNLL1, DYNLRB1, HLA-A, HLA-B, HLA-C, HLA-DRB1, PRDX1, PRDX2, RAB5C, RAB7A, TUBA1A, TUBA1B, TUBA1C, TUBA4A, TUBB, TUBB4B                                                                            |
| Ferroptosis Signaling Pathway                   | 10.9          | 0.167  | ARF1, ARF4, CBS/LOC102724560, CDKN1A, CTSE, EMP1, FTH1, FTL, H2AC18/H2AC19, H2AX, H2AZ1, H2BC12, HMOX1, HSPB1, NFE2L2, PRKAG2, SAT1, SLC3A2, SLC7A11, STEAP3, TP53, TXNRD1                                                                                             |
| mTOR Signaling                                  | 10.3          | 0.126  | CDC42, EIF3C, EIF4A1, EIF4B, EIF4G2, HIF1A, HMOX1, PPP2R2A, PRKAG2, RHOB, RHOC, RHOD, RHOF, RNA18SN5, RPS11, RPS12, RPS15, RPS17, RPS18, RPS19, RPS2, RPS20, RPS24, RPS25, RPS26, RPSA, VEGFA                                                                          |
| RHOGDI Signaling                                | 10            | 0.123  | ACTB, ARHGAP1, ARHGDIA, CD44, CDC42, CDH16, CDH6, CFL1, EZR, GNAI1, GNAI2, GNB1, ITGA3, ITGB1, ITGB3, ITGB4, ITGB8, MSN, MYH10, MYL12A, MYL12B, MYL6, RHOB, RHOC, RHOD, RHOF, WASF2                                                                                    |
| Regulation of eIF4 and p70S6K Signaling         | 8.92          | 0.127  | EIF3C, EIF4A1, EIF4G2, ITGA3, ITGB1, ITGB3, ITGB4, ITGB8, PAIP2, PPP2R2A, RNA18SN5, RPS11, RPS12, RPS15, RPS17, RPS18, RPS19, RPS2, RPS20, RPS24, RPS25, RPS26, RPSA                                                                                                   |
| Coronavirus Pathogenesis Pathway                | 8.59          | 0.118  | ADAM9, CCND1, CXCL8, EEF1A1, HIF1A, IL6, NFKBIA, RAB7A, RNA18SN5, RPS11, RPS12, RPS15, RPS17, RPS18, RPS19, RPS2, RPS20, RPS24, RPS25, RPS26, RPSA, SIGMAR1, TGFB2, TP53                                                                                               |
| Hepatic Fibrosis Signaling Pathway              | 8.57          | 0.0851 | CALM1 (includes others), CCND1, CDC42, CXCL8, FOXO1, FTH1, FTL, GNAI1, GNAI2, HIF1A, IL18, IL1R1, ITGA3, ITGB1, ITGB3, ITGB4, ITGB8, MYL12A, MYL12B, MYL6, MYLK, NFKBIA, PRKAG2, PRKAR1A, PTEN, RHOB, RHOC, RHO D, RHOF, SOD2, SPP1, TGFB2, TIMP1, VEGFA, WNT7A, WNT9B |
| Regulation of Actin-based Motility by Rho       | 8.57          | 0.157  | ACTB, ARHGDI, CDC42, CFL1, ITGA3, ITGB1, ITGB3, ITGB4, ITGB8, MYL12A, MYL12B, MYL6, MYLK, PFN1, RHOB, RHOC, RHOD, RHOF                                                                                                                                                 |
| Sertoli Cell-Sertoli Cell Junction Signaling    | 8.51          | 0.117  | ACTB, ACTN4, CDC42, CLDN1, CLDN10, CLDN16, ITGA3, ITGB1, ITGB3, ITGB4, ITGB8, NECTIN2, OCLN, P RKAG2, PRKAR1A, PTEN, TJP1, TUBA1A, TUBA1B, TUBA1C, TUBA4A, TUBB, TUBB4B, YBX3                                                                                          |
| ILK Signaling                                   | 8.03          | 0.114  | ACTB, ACTN4, CCND1, CDC42, CFL1, HIF1A, ITGB1, ITGB3, ITGB4, ITGB8, KRT18, MYH10, MYL6, PPP2R2A, PTEN, RHOB, RHOC, RHOD, RHOF, TGFB11, TMSB10/TMSB4X, VEGFA, VIM                                                                                                       |
| Sirtuin Signaling Pathway                       | 7.87          | 0.0956 | ATP5MC1, CXCL8, DUSP6, EPAS1, FOXO1, GABARAPL1, GLS, H1-5, HIF1A, MT-CYB, MT-ND1, NDUFB5, NDUFS5, NFE2L2, NQO1, PGAM1, PGK1, PPARGC1A, SLC2A1, SOD2, TP53, TUBA1A, TUBA1B, TUBA1C, TUBA4A, UCP2, VDAC1, VDAC3                                                          |
| Germ Cell-Sertoli Cell Junction Signaling       | 7.27          | 0.118  | ACTB, ACTN4, CDC42, CFL1, IQGAP1, ITGA3, ITGB1, NECTIN2, RHOB, RHOC, RHOD, RHOF, TGFB2, TJP1, TUBA1A, TUBA1B, TUBA1C, TUBA4A, TUBB, TUBB4B                                                                                                                             |
| Leukocyte Extravasation Signaling               | 7.01          | 0.109  | ACTB, ACTN4, ARHGAP1, CD44, CDC42, CLDN1, CLDN10, CLDN16, CYBA, EDIL3, EZR, GNAI1, GNAI2, ITGA3, ITGB1, MMP14, MSN, MYL6, TIMP1, TIMP2, VAV3                                                                                                                           |
| Integrin Signaling                              | 6.94          | 0.104  | ACTB, ACTN4, ARF1, ARF4, CAV1, CDC42, ITGA3, ITGB1, ITGB3, ITGB4, ITGB8, MYL12A, MYL12B, MYLK, PFN1, PTEN, RHOB, RHOC, RHOD, RHOF, TSPAN1, TSPAN4                                                                                                                      |
| Signaling by Rho Family GTPases                 | 6.92          | 0.0936 | ACTB, CDC42, CDH16, CDH6, CFL1, EZR, GNAI1, GNAI2, GNB1, IQGAP1, ITGA3, ITGB1, ITGB3, ITGB4, ITGB8, MSN, MYL12A, MYL12B, MYL6, MYLK, RHOB, RHOC, RHOD, RHOF, VIM                                                                                                       |
| Caveolar-mediated Endocytosis Signaling         | 6.9           | 0.173  | ACTB, CAV1, CD55, HLA-A, HLA-B, HLA-C, ITGA3, ITGB1, ITGB3, ITGB4, ITGB8, PTPN1, RAB5C                                                                                                                                                                                 |
| Protein Kinase A Signaling                      | 6.81          | 0.078  | AKAP12, CALM1 (includes others), DUSP1, DUSP4, DUSP6, GNAI1, GNAI2, GNB1, GYS1, H1-5, ITPR3, KDELR3, KDELR3, MYH10, MYL12A, MYL12B, MYL6, MYLK, NFKBIA, PPP1CA, PRKAG2, PRKAR1A, PTEN, PTPA1, PTPN1, PTPN3, PTPRM, PTPRU, SFN, TGFB2, YWHAH, YWHAZ                     |
| Remodeling of Epithelial Adherens Junctions     | 6.5           | 0.176  | ACTB, ACTN4, IQGAP1, MET, RAB5C, RAB7A, TUBA1A, TUBA1B, TUBA1C, TUBA4A, TUBB, TUBB4B                                                                                                                                                                                   |
| Estrogen Receptor Signaling                     | 6.34          | 0.0758 | ATP5MC1, CAV1, CCND1, CDKN1A, CFL1, CTBP2, FOXO1, GNAI1, GNAI2, GNB1, HIF1A, HNRNP, HSP90AA1, HSP90AB1, MCU, MMP14, MT-CYB, MT-ND1, MYL12A, MYL12B, MYL6, NDUFB5, NDUFS5, PPARGC1A, PRKAG2, PRKAR1A, PTEN, RUNX2, SOD2, TP53, VEGFA                                    |
| Semaphorin Signaling in Neurons                 | 6.11          | 0.18   | ARHGAP1, CDC42, CFL1, DPYSL2, ITGB1, MET, NRP1, RHOB, RHOC, RHOD, RHOF                                                                                                                                                                                                 |
| Axonal Guidance Signaling                       | 6.08          | 0.0688 | ADAM9, ADAMTS1, BMP1, CDC42, CFL1, DPYSL2, GNAI1, GNAI2, GNB1, ITGA3, ITGB1, ITGB3, ITGB4, ITGB8, LNPEP, MET, MMP14, MYL12A, MYL12B, MYL6, NRP1, PFN1, PRKAG2, PRKAR1A, RHOD, SEMA4A, TUBA1A, TUBA1B, TUBA1C, TUBA4A, TUBB, TUBB4B, VEGFA, WNT7A, WNT9B                |
| Actin Cytoskeleton Signaling                    | 5.89          | 0.0902 | ACTB, ACTN4, CDC42, CFL1, EZR, FGF18, IQGAP1, ITGA3, ITGB1, ITGB3, ITGB4, ITGB8, MSN, MYH10, MYL12A, MYL12B, MYL6, MYLK, PFN1, TMSB10/TMSB4X, VAV3, WASF2                                                                                                              |
| NRF2-mediated Oxidative Stress Response         | 5.53          | 0.0886 | ABCC4, ACTB, DNAJA1, DNAJB1, EPHX1, FOSL1, FTH1, FTL, GSR, HERPUD1, HMOX1, HSP90AA1, HSP90AB1, NFE2L2, NQO1, PRDX1, SOD2, TXN, TXNRD1, UBB, VCP                                                                                                                        |
| PI3K/AKT Signaling                              | 5.5           | 0.095  | CCND1, CDKN1A, FOXO1, GYS1, HSP90AA1, HSP90AB1, IL1R1, ITGA3, ITGB1, ITGB3, ITGB4, ITGB8, NFKBIA, PPP2R2A, PTEN, SFN, TP53, YWHAH, YWHAZ                                                                                                                               |
| Semaphorin Neuronal Repulsive Signaling Pathway | 5.37          | 0.107  | CD44, CFL1, DPYSL2, ITGA3, ITGB1, ITGB3, ITGB4, ITGB8, MYL12A, MYL12B, MYL6, NRP1, PRKAG2, PRKAR1A, TP53, VCAN                                                                                                                                                         |
| IL-8 Signaling                                  | 5.19          | 0.0905 | CCND1, CCND3, CDC42, CSTB, CXCL1, CXCL8, GNAI1, GNAI2, GNB1, HMOX1, IQGAP1, ITGB3, MYL12B, NFKBIA, RHOB, RHOC, RHOD, RHOF, VEGFA                                                                                                                                       |
| Iron homeostasis signaling pathway              | 5.18          | 0.109  | ACO1, ATP6V0C, ATP6V0D1, ATP6V0E1, ATP6V1E1, BMP1, CP, EPAS1, FTH1, FTL, HIF1A, HMOX1, IL6, S KP1, STEAP3                                                                                                                                                              |
| Clastrin-mediated Endocytosis Signaling         | 5.13          | 0.0933 | ACTB, APOL1, CDC42, CLU, FGF18, HSPA8, ITGB1, ITGB3, ITGB4, ITGB8, MET, MYO1E, RAB5C, RAB7A, UBA52, UBB, UBC, VEGFA                                                                                                                                                    |
| Hypoxia Signaling in the Cardiovascular System  | 5.13          | 0.145  | HIF1A, HSP90AA1, HSP90AB1, NFKBIA, NQO1, P4HB, PTEN, TP53, UBE2L3, UBE2V1, VEGFA                                                                                                                                                                                       |
| Osteoarthritis Pathway                          | 5.01          | 0.0847 | ANXA2, ANXA5, CXCL8, EPAS1, FGF18, HIF1A, IL1R1, ITGA3, ITGB1, ITGB3, ITGB4, ITGB8, PPARGC1A, PRKAG2, PTH1R, PTHLH, RUNX2, SPP1, TGFB2, VEGFA                                                                                                                          |
| Tight Junction Signaling                        | 4.99          | 0.095  | ACTB, CDC42, CLDN1, CLDN10, CLDN16, MYH10, MYL6, MYLK, NECTIN2, OCLN, PPP2R2A, PRKAG2, PRKAR1A, PTEN, TGFB2, TJP1, YBX3                                                                                                                                                |
| CLEAR Signaling Pathway                         | 4.8           | 0.0772 | ATP6V0C, ATP6V0D1, ATP6V0E1, ATP6V1E1, BLOC1S1, CTNS, CTSE, HIF1A, ITPR3, NEU1, PML, PPARGC1A, PPP2R2A, PRKAG2, PSAP, RAB7A, SFN, TGFB2, TP53, VEGFA, YWHAH, YWHAZ                                                                                                     |
| Role of Tissue Factor in Cancer                 | 4.71          | 0.112  | CDC42, CFL1, CSF1, CXCL1, CXCL8, F3, ITGA3, ITGB1, ITGB3, P4HB, PTEN, TP53, VEGFA                                                                                                                                                                                      |
| Epithelial Adherens Junction Signaling          | 4.5           | 0.0955 | CD42, CFL1, IQGAP1, MET, MYH10, MYL12A, MYL12B, NECTIN2, PPP2R2A, PRKAG2, PTEN, SFN, TGFB2, YWHAH, YWHAZ                                                                                                                                                               |
| Glucocorticoid Receptor Signaling               | 4.41          | 0.0583 | ACTB, ANXA1, ATP5MC1, CAV1, CDKN1A, CXCL3, CXCL8, DUSP1, HLA-A, HLA-B, HLA-C, HLA-DMA, HLA-DRB1, HSP90AA1, HSP90AB1, HSPA1A, HSPA1B, HSPA8, IL1R1, IL6, KRT18, KRT19, KRT7, KRT8, MT-CYB, MT-ND1, NDUFB5, NDUFS5, NFKBIA, POLR2C, PRKAG2, SLP1, SMARCC2, TGFB2, YWHAH  |
| Tumor Microenvironment Pathway                  | 4.41          | 0.0894 | CCND1, CD44, CSF1, CXCL8, FGF18, FOXO1, HIF1A, HLA-A, HLA-B, HLA-C, IL6, ITGB3, MMP14, SLC2A1, SPP1, VEGFA                                                                                                                                                             |

|                                                            |      |        |                                                                                                                                                            |
|------------------------------------------------------------|------|--------|------------------------------------------------------------------------------------------------------------------------------------------------------------|
| Hereditary Breast Cancer Signaling                         | 4.39 | 0.0986 | ACTB,CCND1,CCND3,CDKN1A,H2AX,POLR2C,PTEN,RAD50,SFN,SMARCC2,TP53,UBA52,UBB,UBC                                                                              |
| HIF1α Signaling                                            | 4.15 | 0.0817 | CDKN1A,ELOC,HIF1A,HMOX1,HSP90AA1,HSPA1A/HSPA1B,HSPA8,IL6,MET,MMP14,PKM,RAN,SAT1,SLC2A1,TP53,VEGFA,VIM                                                      |
| Agranulocyte Adhesion and Diapedesis                       | 4.1  | 0.081  | ACTB,CLDN1,CLDN10,CLDN16,CXCL1,CXCL3,CXCL8,EZR,GNAI1,GNAI2,IL18,IL1R1,ITGB1,MMP14,MSN,MYH10,MYL6                                                           |
| Antigen Presentation Pathway                               | 4.07 | 0.179  | CD74,HLA-A,HLA-B,HLA-C,HLA-DMA,HLA-DRB1,TAPBP                                                                                                              |
| BEX2 Signaling Pathway                                     | 4.07 | 0.122  | CCND1,CDKN1A,HIF1A,LDB1,LGALS1,NFKBIA,PPP2R2A,PTEN,SPP1,VEGFA                                                                                              |
| Hepatic Fibrosis / Hepatic Stellate Cell Activation        | 3.99 | 0.0825 | CSF1,CXCL3,CXCL8,ECE1,IFNGR2,IGFBP3,IL1R1,IL6,KLF6,MET,MYH10,MYL6,TGFBR2,TIMP1,TIMP2,VEGFA                                                                 |
| Sumoylation Pathway                                        | 3.88 | 0.107  | ARHGDIA,CDC42,CTBP2,NFKBIA,PML,RAN,RHOB,RHOC,RHOD,RHOF,TP53                                                                                                |
| Virus Entry via Endocytic Pathways                         | 3.85 | 0.106  | ACTB,CAV1,CD55,CDC42,HLA-A,HLA-B,HLA-C,ITGB1,ITGB3,ITGB4,ITGB8                                                                                             |
| Glioma Invasiveness Signaling                              | 3.75 | 0.123  | CD44,CDC42,ITGB3,RHOB,RHOC,RHOD,RHOF,TIMP1,TIMP2                                                                                                           |
| RAR Activation                                             | 3.74 | 0.0784 | ACTB,AKR1B1,AKR1C1/AKR1C2,AKR1C3,ALDH1A1,DUSP1,IGFBP3,NR2F2,PML,PPARGC1A,PRKAG2,PRKAR1A,PTEN,RDH10,SMARCC2,VEGFA                                           |
| Crosstalk between Dendritic Cells and Natural Killer Cells | 3.68 | 0.11   | ACTB,FSCN1,HLA-A,HLA-B,HLA-C,HLA-DRB1,IL18,IL6,NECTIN2,TNFSF10                                                                                             |
| Coronavirus Replication Pathway                            | 3.67 | 0.156  | IFITM1,TUBA1A,TUBA1B,TUBA1C,TUBA4A,TUBB,TUBB4B                                                                                                             |
| MicroRNA Biogenesis Signaling Pathway                      | 3.64 | 0.0802 | DDX17,DNAJB1,FUS,HMOX1,HNRNPA2B1,HNRNPD,HSP90AA1,HSP90AB1,HSPA8,ILF2,POLR2C,RAN,SRSF1,TP53,VEGFA                                                           |
| Protein Ubiquitination Pathway                             | 3.62 | 0.0693 | DNAJA1,DNAJB1,ELOC,HLA-A,HLA-B,HLA-C,HSP90AA1,HSP90AB1,HSPA1A/HSPA1B,HSPA8,HSPB1,PSMB2,PSMD8,SKP1,UBA52,UBB,UBC,UBE2L3,UBE2V1                              |
| Actin Nucleation by ARP-WASP Complex                       | 3.61 | 0.108  | CDC42,ITGA3,ITGB1,ITGB3,ITGB4,ITGB8,RHOB,RHOC,RHOD,RHOF                                                                                                    |
| Mitochondrial Dysfunction                                  | 3.53 | 0.0819 | ACO1,ATP5MC1,COX7A2L,CYB5R3,GSR,MT-CO1,MT-CYB,MT-ND1,NDUFB5,NDUFS5,SOD2,UCP2,VDAC1,VDAC3                                                                   |
| Glioblastoma Multiforme Signaling                          | 3.53 | 0.0819 | CCND1,CCND3,CDC42,CDKN1A,FOXO1,ITPR3,PTEN,RHOB,RHOC,RHOD,RHOF,TP53,WNT7A,WNT9B                                                                             |
| Molecular Mechanisms of Cancer                             | 3.51 | 0.0583 | BMP1,CCND1,CCND3,CDC42,CDKN1A,FOXO1,GNAI1,GNAI2,GNB1,HIF1A,ITGA3,ITGB1,ITGB3,ITGB4,ITGB8,NFKBIA,PRKAG2,PRKAR1A,RHOB,RHOC,RHOD,RHOF,TGFBR2,TP53,WNT7A,WNT9B |
| Renal Cell Carcinoma Signaling                             | 3.49 | 0.114  | CDC42,ELOC,HIF1A,MET,SLC2A1,UBA52,UBB,UBC,VEGFA                                                                                                            |
| Cholesterol Biosynthesis I                                 | 3.47 | 0.308  | CYP51A1,DHCR7,MSMO1,TM7SF2                                                                                                                                 |
| Cholesterol Biosynthesis II (via 24,25-dihydrolanosterol)  | 3.47 | 0.308  | CYP51A1,DHCR7,MSMO1,TM7SF2                                                                                                                                 |
| Cholesterol Biosynthesis III (via Desmosterol)             | 3.47 | 0.308  | CYP51A1,DHCR7,MSMO1,TM7SF2                                                                                                                                 |
| Vitamin-C Transport                                        | 3.45 | 0.217  | LRRRC8A,SELENOT,SLC2A1,TXN,TXNRD1                                                                                                                          |
| Zymosterol Biosynthesis                                    | 3.4  | 0.5    | CYP51A1,MSMO1,TM7SF2                                                                                                                                       |
| PAK Signaling                                              | 3.4  | 0.094  | CDC42,CFL1,ITGA3,ITGB1,ITGB3,ITGB4,ITGB8,MYL12A,MYL12B,MYL6,MYLK                                                                                           |
| PXR/RXR Activation                                         | 3.39 | 0.123  | ALDH1A1,FOXO1,IL6,PPARGC1A,PRKAG2,PRKAR1A,SCD,UGT1A9 (includes others)                                                                                     |
| Gap Junction Signaling                                     | 3.38 | 0.0758 | ACTB,CAV1,GNAI1,GNAI2,ITPR3,PRKAG2,PRKAR1A,SMARCC2,TJP1,TUBA1A,TUBA1B,TUBA1C,TUBA4A,TUBB,TUBB4B                                                            |
| AMPK Signaling                                             | 3.37 | 0.0702 | ACTB,CCND1,CDKN1A,FOXO1,GNAI1,GNAI2,GNB1,GYS1,PPARGC1A,PPP2R2A,PRKAG2,PRKAR1A,RAB6A,RAB7A,RAB8A,SLC2A1,SMARCC2                                             |
| Aryl Hydrocarbon Receptor Signaling                        | 3.31 | 0.0818 | AHR,ALDH1A1,CCND1,CCND3,CDKN1A,HSP90AA1,HSP90AB1,HSPB1,IL6,NFE2L2,NQO1,TGM2,TP53                                                                           |
| BAG2 Signaling Pathway                                     | 3.29 | 0.107  | ANXA2,CDKN1A,CTSB,HSP90AA1,HSPA1A/HSPA1B,HSPA8,PSMB2,PSMD8,TP53                                                                                            |
| Colorectal Cancer Metastasis Signaling                     | 3.24 | 0.0664 | CCND1,CDC42,GNAI1,GNAI2,GNB1,IL6,MMP14,PRKAG2,PRKAR1A,RHOB,RHOC,RHOD,RHOF,TGFBR2,TP53,VEGFA,WNT7A,WNT9B                                                    |
| Thioredoxin Pathway                                        | 3.17 | 0.429  | SELENOT,TXN,TXNRD1                                                                                                                                         |
| Wound Healing Signaling Pathway                            | 3.17 | 0.0675 | CXCL8,IFNGR2,IL18,IL1R1,IL6,ITGA3,ITGB1,ITGB4,LAMA3,LAMB3,LAMC1,LAMC2,NFKBIA,TGFBR2,TNFSF10,VEGFA,VIM                                                      |
| Glycolysis I                                               | 3.11 | 0.185  | ALDOA,GAPDH,PGAM1,PGK1,PKM                                                                                                                                 |
| Gluconeogenesis I                                          | 3.11 | 0.185  | ALDOA,GAPDH,MDH2,PGAM1,PGK1                                                                                                                                |
| Regulation of Cellular Mechanics by Calpain Protease       | 3.1  | 0.101  | ACTN4,CCND1,CCND3,EZR,ITGA3,ITGB1,ITGB3,ITGB4,ITGB8                                                                                                        |
| 14-3-3-mediated Signaling                                  | 3.09 | 0.0866 | FOXO1,SFN,TUBA1A,TUBA1B,TUBA1C,TUBA4A,TUBB,TUBB4B,VIM,YWHAH,YWHAZ                                                                                          |
| Granulocyte Adhesion and Diapedesis                        | 3.09 | 0.0741 | CLDN1,CLDN10,CLDN16,CXCL1,CXCL3,CXCL8,EZR,GNAI1,GNAI2,IL18,IL1R1,ITGB1,MMP14,MSN                                                                           |
| Immunogenic Cell Death Signaling Pathway                   | 3.07 | 0.1    | ANXA1,BCAP31,DAPK1,HSP90AA1,HSP90AB1,HSPA1A/HSPA1B,HSPA8,IFNGR2,IL6                                                                                        |
| Gαq Signaling                                              | 3.04 | 0.0765 | CALM1 (includes others),CDC42,GNAI1,GNAI2,GNB1,GYS1,HMOX1,ITPR3,NFKBIA,RHOB,RHOC,RHOD,RHOF                                                                 |
| PTEN Signaling                                             | 3.02 | 0.08   | CCND1,CDC42,CDKN1A,FOXO1,ITGA3,ITGB1,ITGB3,ITGB4,ITGB8,PTEN,TGFBR2,YWHAH                                                                                   |
| ERK/MAPK Signaling                                         | 3.01 | 0.0698 | DUSP1,DUSP4,DUSP6,HSPB1,ITGA3,ITGB1,ITGB3,ITGB4,ITGB8,PPP1CA,PPP2R2A,PRKAG2,PRKAR1A,YWHAH,YWHAZ                                                            |
| Cardiac Hypertrophy Signaling                              | 3    | 0.0651 | CALM1 (includes others),CDC42,GNAI1,GNAI2,GNB1,HSPB1,IL6,MYL12A,MYL12B,MYL6,PRKAG2,PRKAR1A,RHOB,RHOC,RHOD,RHOF,TGFBR2                                      |
| NAD Signaling Pathway                                      | 2.99 | 0.0795 | H1-5,H2BC12,HIF1A,NT5E,PARP14,POLR2C,PPARGC1A,PRKAG2,SOD2,TP53,TPCN1,VEGFA                                                                                 |
| Autophagy                                                  | 2.99 | 0.0694 | CALM1 (includes others),DAPK1,FOXO1,GABARAPL1,GORASP2,HIF1A,PPP2R2A,PRKAG2,PRKAR1A,PTEN,RAB7A,RIPK2,SLC3A2,TP53,VEGFA                                      |
| Polyamine Regulation in Colon Cancer                       | 2.98 | 0.121  | EIF5A,OAZ1,ODC1,SAT1,SLC3A2,SRM,TP53                                                                                                                       |
| Macropinocytosis Signaling                                 | 2.93 | 0.105  | ACTN4,CDC42,CSF1,ITGB1,ITGB3,ITGB4,ITGB8,MET                                                                                                               |
| CDK5 Signaling                                             | 2.88 | 0.087  | ITGA3,ITGB1,LAMA3,LAMB3,LAMC1,LAMC2,PPP1CA,PPP2R2A,PRKAG2,PRKAR1A                                                                                          |
| Multiple Sclerosis Signaling Pathway                       | 2.87 | 0.0676 | C3,CXCL1,CXCL8,DUSP1,DUSP6,HLA-A,HLA-B,HLA-C,HLA-DMA,HLA-DRB1,IFNGR2,IL18,IL6,PARP14,TNFSF10                                                               |

|                                                                           |      |        |                                                                                                                            |
|---------------------------------------------------------------------------|------|--------|----------------------------------------------------------------------------------------------------------------------------|
| Neuregulin Signaling                                                      | 2.82 | 0.0855 | ERBB4,ERRF1,HSP90AA1,HSP90AB1,ITGA3,ITGB1,ITGB3,ITGB4,ITGB8,PTEN                                                           |
| p53 Signaling                                                             | 2.81 | 0.0918 | CCND1,CDKN1A,HIF1A,PERP,PML,PTEN,SFN,THBS1,TP53                                                                            |
| HER-2 Signaling in Breast Cancer                                          | 2.77 | 0.0661 | ARF1,ARF4,CCND1,CDC42,CDKN1A,COX7A2L,FOXO1,ITGB1,ITGB3,ITGB4,ITGB8,MT-CO1,NFKBIA,PTEN,TP53                                 |
| Senescence Pathway                                                        | 2.75 | 0.0602 | CALM1 (includes others),CCND1,CCND3,CDKN1A,CXCL8,IL6,ITPR3,MCU,PML,PPP1CA,PPP2R2A,PTEN,RAD50,SAA1,SOD2,TGFBR2,TP53,ZFP36L1 |
| MSP-RON Signaling In Cancer Cells Pathway                                 | 2.75 | 0.0786 | CCND1,HIF1A,ITGB1,ITGB4,MET,NFKBIA,SFN,VEGFA,VIM,YWHAH,YWHAZ                                                               |
| Calcium Transport I                                                       | 2.66 | 0.3    | ANXA5,ATP2A2,ATP2B4                                                                                                        |
| Inhibition of Angiogenesis by TSP1                                        | 2.65 | 0.147  | HSPG2,TGFBR2,THBS1,TP53,VEGFA                                                                                              |
| RHOA Signaling                                                            | 2.63 | 0.0806 | ACTB,ARHGAP1,CFL1,EZR,MSN,MYL12A,MYL12B,MYL6,MYLK,PFN1                                                                     |
| Macrophage Classical Activation Signaling Pathway                         | 2.63 | 0.0688 | CXCL8,GBP2,HIF1A,HLA-DMA,HLA-DRB1,IFNGR2,IL18,IL6,MT-CO1,NFKBIA,PARP14,PKM,TNFSF10                                         |
| Role Of Osteoclasts In Rheumatoid Arthritis Signaling Pathway             | 2.61 | 0.0584 | ADAM9,CALM1 (includes others),CCND1,CDC42,CSF1,FOXO1,IL18,IL1R1,ITGB3,MMP14,NFKBIA,PTPN1,RHOB,RHOC,RHOD,RHOF,SPP1,VAV3     |
| Cell Cycle: G2/M DNA Damage Checkpoint Regulation                         | 2.61 | 0.12   | CDKN1A,SFN,SKP1,TP53,YWHAH,YWHAZ                                                                                           |
| CXCR4 Signaling                                                           | 2.6  | 0.0714 | CDC42,GNAI1,GNAI2,GNB1,ITPR3,MYL12A,MYL12B,MYL6,RHOB,RHOC,RHOD,RHOF                                                        |
| Androgen Signaling                                                        | 2.58 | 0.071  | CALM1 (includes others),CCND1,DNAJB1,GNAI1,GNAI2,GNB1,HSP90AA1,ITPR3,POLR2C,PRKAG2,PRKAR1A,TGFB1,I1                        |
| Ribonucleotide Reductase Signaling Pathway                                | 2.56 | 0.0706 | ACTB,CCND1,CDKN1A,HIF1A,IL6,MET,PARP14,SKP1,SMARCC2,THBS1,TP53,VEGFA                                                       |
| Paxillin Signaling                                                        | 2.54 | 0.0841 | ACTB,ACTN4,ARF1,CDC42,ITGA3,ITGB1,ITGB3,ITGB4,ITGB8                                                                        |
| Cellular Effects of Sildenafil (Viagra)                                   | 2.51 | 0.0733 | ACTB,CALM1 (includes others),ITPR3,MYH10,MYL12A,MYL12B,MYL6,MYLK,PRKAG2,PRKAR1A,SLC4A11                                    |
| Complement System                                                         | 2.48 | 0.135  | C3,CD55,CD59,CFB,CFI                                                                                                       |
| Unfolded protein response                                                 | 2.46 | 0.0889 | DNAJA1,DNAJB1,HSPA1A/HSPA1B,HSPA8,NFE2L2,P4HB,VCP,XBP1                                                                     |
| Natural Killer Cell Signaling                                             | 2.45 | 0.0657 | CDC42,CFL1,HLA-A,HLA-B,HLA-C,HSPA1A/HSPA1B,HSPA8,IL18,ITGB1,NECTIN2,PVR,TNFSF10,VAV3                                       |
| HGF Signaling                                                             | 2.43 | 0.0758 | CCND1,CDC42,CDKN1A,IL6,ITGA3,ITGB1,ITGB3,ITGB4,ITGB8,MET                                                                   |
| Role of Osteoblasts, Osteoclasts and Chondrocytes in Rheumatoid Arthritis | 2.41 | 0.0625 | BMP1,CALM1 (includes others),CSF1,FOXO1,IL18,IL1R1,IL6,ITGB3,MMP14,NFKBIA,RUNX2,SPP1,WNT7A,WNT9B                           |
| ID1 Signaling Pathway                                                     | 2.4  | 0.0647 | BHLHA15,CAV1,CCND1,CDKN1A,HIF1A,IL6,PTEN,RHOC,TGFBR2,TGM2,TP53,VEGFA,VIM                                                   |
| Thrombin Signaling                                                        | 2.39 | 0.0622 | ARHGEF38,CDC42,GNAI1,GNAI2,GNB1,ITPR3,MYL12A,MYL12B,MYL6,MYLK,RHOB,RHOC,RHOD,RHOF                                          |
| CSDE1 Signaling Pathway                                                   | 2.36 | 0.107  | CCND3,FUS,HNRNPC,HNRNPD,PTEN,VIM                                                                                           |
| Bladder Cancer Signaling                                                  | 2.31 | 0.0776 | CCND1,CDKN1A,CXCL8,DAPK1,FGF18,MMP14,THBS1,TP53,VEGFA                                                                      |
| Oxytocin Signaling Pathway                                                | 2.26 | 0.0567 | ATP2B4,CALM1 (includes others),CXCL8,GNAI1,GNAI2,GNB1,HSPB1,IL6,ITPR3,MYH10,MYL6,MYLK,NFE2L2,PRKAG2,PRKAR1A,SMARCC2        |
| HOTAIR Regulatory Pathway                                                 | 2.24 | 0.0675 | CD44,CDKN1A,MET,MMP14,NFKBIA,PTEN,RHOC,SPP1,VIM,WNT7A,WNT9B                                                                |
| VDR/RXR Activation                                                        | 2.24 | 0.0897 | CDKN1A,FOXO1,HSD17B2,IGFBP3,RUNX2,SERPINB1,SPP1                                                                            |
| Retinoate Biosynthesis I                                                  | 2.24 | 0.119  | AKR1B1,AKR1C1/AKR1C2,AKR1C3,ALDH1A1,RDH10                                                                                  |
| Role of IL-17A in Psoriasis                                               | 2.22 | 0.214  | CXCL1,CXCL3,CXCL8                                                                                                          |
| Nitric Oxide Signaling in the Cardiovascular System                       | 2.21 | 0.075  | ATP2A2,CALM1 (includes others),CAV1,HSP90AA1,HSP90AB1,ITPR3,PRKAG2,PRKAR1A,VEGFA                                           |
| Apelin Cardiomyocyte Signaling Pathway                                    | 2.21 | 0.0808 | ATP2A2,GNAI1,GNAI2,HIF1A,MYL12A,MYL12B,MYL6,MYLK                                                                           |
| HMGB1 Signaling                                                           | 2.17 | 0.0659 | CDC42,CXCL8,IFNGR2,IL18,IL1R1,IL6,RHOB,RHOC,RHOD,RHOF,TNFSF10                                                              |
| Production of Nitric Oxide and Reactive Oxygen Species in Macrophages     | 2.16 | 0.0628 | APOL1,CDC42,CLU,CYBA,IFNGR2,NFKBIA,PPP1CA,PPP2R2A,RHOB,RHOC,RHOD,RHOF                                                      |
| Aldosterone Signaling in Epithelial Cells                                 | 2.15 | 0.0655 | DNAJA1,DNAJB1,DUSP1,HSP90AA1,HSP90AB1,HSPA1A/HSPA1B,HSPA8,HSPB1,ICMT,ITPR3,SLC12A1                                         |
| LXR/RXR Activation                                                        | 2.15 | 0.0732 | APOL1,C3,CLU,CYP51A1,IL18,IL1R1,IL6,SAA1,SCD                                                                               |
| Neuroinflammation Signaling Pathway                                       | 2.13 | 0.0536 | CXCL8,GLS,HLA-A,HLA-B,HLA-C,HLA-DMA,HLA-DRB1,HMOX1,IFNGR2,IL18,IL1R1,IL6,MFGE8,NFE2L2,SLC6A13,SOD2,TGFBR2                  |
| Estrogen Biosynthesis                                                     | 2.11 | 0.111  | AKR1C1/AKR1C2,AKR1C3,CYP51A1,HSD17B2,POR                                                                                   |
| Endocannabinoid Cancer Inhibition Pathway                                 | 2.11 | 0.068  | CCND1,CCND3,CDKN1A,GNAI1,GNAI2,HIF1A,PRKAG2,PRKAR1A,VEGFA,VIM                                                              |
| Superpathway of Cholesterol Biosynthesis                                  | 2.1  | 0.138  | CYP51A1,DHCR7,MSMO1,TM7SF2                                                                                                 |
| Pulmonary Fibrosis Idiopathic Signaling Pathway                           | 2.02 | 0.0521 | ACTB,ADAMTS1,AXL,CAV1,CCND1,FGF18,FOXO1,IL6,ITGB1,MMP14,PTEN,TGFBR2,THBS1,TP53,VIM,WNT7A,WNT9B                             |
| HIPPO signaling                                                           | 2.01 | 0.0814 | CD44,PPP1CA,PPP2R2A,SFN,SKP1,YWHAH,YWHAZ                                                                                   |
| $\alpha$ -Adrenergic Signaling                                            | 1.99 | 0.0741 | CALM1 (includes others),GNAI1,GNAI2,GNB1,GYS1,ITPR3,PRKAG2,PRKAR1A                                                         |
| Apelin Muscle Signaling Pathway                                           | 1.99 | 0.104  | GNAI1,GNAI2,GNB1,PPARGC1A,PRKAG2                                                                                           |
| Xenobiotic Metabolism AHR Signaling Pathway                               | 1.99 | 0.0805 | AHR,ALDH1A1,HSP90AA1,HSP90AB1,IL6,NQO1,UGT1A9 (includes others)                                                            |
| Stearate Biosynthesis I (Animals)                                         | 1.98 | 0.0896 | ACOT7,ACSL1,ELOVL1,MBOAT7,PORCN,SRD5A3                                                                                     |
| Atherosclerosis Signaling                                                 | 1.97 | 0.0687 | APOL1,CLU,CSF1,CXCL8,F3,IL18,IL6,PLAAT4,TNFRSF12A                                                                          |
| Pentose Phosphate Pathway (Non-oxidative Branch)                          | 1.97 | 0.333  | TALDO1,TKT                                                                                                                 |



|                                                                |      |        |                                                                                                                                                                     |
|----------------------------------------------------------------|------|--------|---------------------------------------------------------------------------------------------------------------------------------------------------------------------|
| RAN Signaling                                                  | 1.97 | 0.176  | CSE1L,KPNA2,RAN                                                                                                                                                     |
| Cell Cycle: G1/S Checkpoint Regulation                         | 1.95 | 0.0882 | CCND1,CCND3,CDKN1A,FOXO1,SKP1,TP53                                                                                                                                  |
| eNOS Signaling                                                 | 1.94 | 0.0641 | CALM1 (includes others),CAV1,HSP90AA1,HSP90AB1,HSPA1A/HSPA1B,HSPA8,ITPR3,PRKAG2,PRKAR1A,VEGFA                                                                       |
| FAT10 Cancer Signaling Pathway                                 | 1.92 | 0.1    | EEF1A1,IL6,NFKBIA,TGFBR2,TP53                                                                                                                                       |
| D-myo-inositol (1,4,5,6)-Tetrakisphosphate Biosynthesis        | 1.89 | 0.0601 | ATP1A1,DUSP1,DUSP4,DUSP6,G6PC3,HACD2,PPP1CA,PPP2R2A,PTEN,PTPN1,PTPRM                                                                                                |
| D-myo-inositol (3,4,5,6)-tetrakisphosphate Biosynthesis        | 1.89 | 0.0601 | ATP1A1,DUSP1,DUSP4,DUSP6,G6PC3,HACD2,PPP1CA,PPP2R2A,PTEN,PTPN1,PTPRM                                                                                                |
| Apelin Adipocyte Signaling Pathway                             | 1.89 | 0.0769 | GNAI1,GNAI2,GPX1,HIF1A,PPARGC1A,PRKAG2,PRKAR1A                                                                                                                      |
| SNARE Signaling Pathway                                        | 1.88 | 0.0662 | CALM1 (includes others),HSPA8,MYH10,MYL6,PRKAG2,PRKAR1A,RAB6A,RAB7A,RAB8A                                                                                           |
| Prostate Cancer Signaling                                      | 1.86 | 0.0702 | CCND1,CDKN1A,FOXO1,HSP90AA1,HSP90AB1,NFKBIA,PTEN,TP53                                                                                                               |
| RAC Signaling                                                  | 1.86 | 0.0657 | CD44,CDC42,CFL1,IQGAP1,ITGA3,ITGB1,ITGB3,ITGB4,ITGB8                                                                                                                |
| Acute Phase Response Signaling                                 | 1.85 | 0.0595 | C3,CFB,CP,FTL,HMOX1,IL18,IL1R1,IL6,NFKBIA,SAI1,SOD2                                                                                                                 |
| Dopamine-DARPP32 Feedback in cAMP Signaling                    | 1.85 | 0.0595 | ATP2A2,CALM1 (includes others),GNAI1,GNAI2,ITPR3,KCNJ1,KCNJ16,PPP1CA,PPP2R2A,PRKAG2,PRKAR1A                                                                         |
| Triacylglycerol Biosynthesis                                   | 1.85 | 0.0962 | ELOVL1,LPCAT1,MBOAT7,PLPP2,PORCN                                                                                                                                    |
| Ephrin B Signaling                                             | 1.84 | 0.0833 | CDC42,CFL1,GNAI1,GNAI2,GNB1,VAV3                                                                                                                                    |
| Aspartate Degradation II                                       | 1.84 | 0.286  | GOT1,MDH2                                                                                                                                                           |
| Inhibition of ARE-Mediated mRNA Degradation Pathway            | 1.83 | 0.0617 | PPP2R2A,PRKAG2,PRKAR1A,PSMB2,PSMD8,SFN,TNFSF10,YWHAH,YWHAZ,ZFP36L1                                                                                                  |
| IL-17 Signaling                                                | 1.82 | 0.0588 | CXCL1,CXCL3,CXCL8,HSP90AA1,HSP90AB1,IL18,IL6,LCN2,SRSF1,TNFSF10,VEGFA                                                                                               |
| Cardiac Hypertrophy Signaling (Enhanced)                       | 1.79 | 0.0443 | ATP2A2,CALM1 (includes others),CXCL8,FGF18,GNAI1,GNAI2,GNB1,HSPB1,IL18,IL1R1,IL6,ITGA3,ITGB1,ITGB3,ITGB4,ITGB8,ITPR3,PRKAG2,PRKAR1A,PTEN,TGFBR2,TNFSF10,WNT7A,WNT9B |
| Role Of Chondrocytes In Rheumatoid Arthritis Signaling Pathway | 1.78 | 0.0638 | CXCL8,IL18,IL1R1,IL6,ITGB1,MMP14,PRKAG2,RUNX2,VEGFA                                                                                                                 |
| Airway Pathology in Chronic Obstructive Pulmonary Disease      | 1.78 | 0.0678 | CXCL1,CXCL3,CXCL8,FGF18,IL18,IL6,LCN2,TNFSF10                                                                                                                       |
| Interferon Signaling                                           | 1.77 | 0.111  | IFI6,IFITM1,IFNGR2,MX1                                                                                                                                              |
| IL-1 Signaling                                                 | 1.77 | 0.0729 | GNAI1,GNAI2,GNB1,IL1R1,NFKBIA,PRKAG2,PRKAR1A                                                                                                                        |
| Superoxide Radicals Degradation                                | 1.72 | 0.25   | NQO1,SOD2                                                                                                                                                           |
| Calcium Signaling                                              | 1.72 | 0.0548 | ASPH,ATP2A2,ATP2B4,CALM1 (includes others),ITPR3,MCU,MYH10,MYL6,PRKAG2,PRKAR1A,TPM3,TPM4                                                                            |
| 3-phosphoinositide Degradation                                 | 1.7  | 0.0564 | ATP1A1,DUSP1,DUSP4,DUSP6,G6PC3,HACD2,PPP1CA,PPP2R2A,PTEN,PTPN1,PTPRM                                                                                                |
| Toll-like Receptor Signaling                                   | 1.68 | 0.0769 | IL18,NFKBIA,TNFAIP3,UBA52,UBB,UBC                                                                                                                                   |
| Inhibition of Matrix Metalloproteases                          | 1.66 | 0.103  | HSPG2,MMP14,TIMP1,TIMP2                                                                                                                                             |
| Pulmonary Healing Signaling Pathway                            | 1.64 | 0.0553 | CCND1,CDC42,CFL1,HIF1A,MMP14,NFKBIA,PRKAG2,THBS1,VEGFA,WNT7A,WNT9B                                                                                                  |
| D-myo-inositol-5-phosphate Metabolism                          | 1.64 | 0.0553 | ATP1A1,DUSP1,DUSP4,DUSP6,G6PC3,HACD2,PPP1CA,PPP2R2A,PTEN,PTPN1,PTPRM                                                                                                |
| WNT/ $\beta$ -catenin Signaling                                | 1.64 | 0.0575 | CCND1,CD44,PPP2R2A,TGFBR2,TP53,UBA52,UBB,UBC,WNT7A,WNT9B                                                                                                            |
| Role of BRCA1 in DNA Damage Response                           | 1.63 | 0.075  | ACTB,BABAM2,CDKN1A,RAD50,SMARCC2,TP53                                                                                                                               |
| FXR/RXR Activation                                             | 1.62 | 0.0635 | APOL1,C3,CLU,FOXO1,G6PC3,IL18,PPARGC1A,SAI1                                                                                                                         |
| GADD45 Signaling                                               | 1.61 | 0.0833 | CCND1,CCND3,CDKN1A,TGFBR2,TP53                                                                                                                                      |
| Ephrin Receptor Signaling                                      | 1.6  | 0.0545 | CDC42,CFL1,GNAI1,GNAI2,GNB1,ITGA3,ITGB1,ITGB3,ITGB4,ITGB8,VEGFA                                                                                                     |
| IGF-1 Signaling                                                | 1.6  | 0.0673 | FOXO1,IGFBP3,PRKAG2,PRKAR1A,SFN,YWHAH,YWHAZ                                                                                                                         |
| Huntington's Disease Signaling                                 | 1.58 | 0.0495 | ATP5MC1,DNAJB1,GLS,GNB1,HSPA1A/HSPA1B,HSPA8,POLR2C,PSMB2,PSMD8,TGM2,TP53,UBA52,UBB,UBC                                                                              |
| G Beta Gamma Signaling                                         | 1.57 | 0.062  | CAV1,CDC42,GNAI1,GNAI2,GNB1,ITPR3,PRKAG2,PRKAR1A                                                                                                                    |
| Thiamin Salvage III                                            | 1.56 | 1      | TPK1                                                                                                                                                                |
| PD-1, PD-L1 cancer immunotherapy pathway                       | 1.56 | 0.066  | HLA-A,HLA-B,HLA-C,HLA-DMA,HLA-DRB1,IFNGR2,PTEN                                                                                                                      |
| Relaxin Signaling                                              | 1.55 | 0.0581 | GNAI1,GNAI2,GNB1,NFKBIA,PRKAG2,PRKAR1A,RXFP1,SMARCC2,VEGFA                                                                                                          |
| TR/RXR Activation                                              | 1.54 | 0.0714 | AKR1C1/AKR1C2,AKR1C3,HIF1A,PPARGC1A,SLC2A1,UCP2                                                                                                                     |
| Chronic Myeloid Leukemia Signaling                             | 1.54 | 0.0654 | CCND1,CCND3,CDKN1A,CTBP2,MECOM,TGFBR2,TP53                                                                                                                          |
| Cyclins and Cell Cycle Regulation                              | 1.52 | 0.0706 | CCND1,CCND3,CDKN1A,PPP2R2A,SKP1,TP53                                                                                                                                |
| GABA Receptor Signaling                                        | 1.52 | 0.0606 | GNAI1,GNAI2,GNB1,ITPR3,SLC6A13,UBA52,UBB,UBC                                                                                                                        |
| 3-phosphoinositide Biosynthesis                                | 1.51 | 0.0526 | ATP1A1,DUSP1,DUSP4,DUSP6,G6PC3,HACD2,PPP1CA,PPP2R2A,PTEN,PTPN1,PTPRM                                                                                                |
| G $\alpha$ 12/13 Signaling                                     | 1.5  | 0.0602 | CDC42,CDH16,CDH6,MYL12A,MYL12B,MYL6,NFKBIA,VAV3                                                                                                                     |
| Ovarian Cancer Signaling                                       | 1.5  | 0.057  | CCND1,CD44,PRKAG2,PRKAR1A,PTEN,TP53,VEGFA,WNT7A,WNT9B                                                                                                               |
| Oxidative Phosphorylation                                      | 1.46 | 0.0631 | ATP5MC1,COX7A2L,MT-CO1,MT-CYB,MT-ND1,NDUFB5,NDUFS5                                                                                                                  |
| Role of PKR in Interferon Induction and Antiviral Response     | 1.45 | 0.0588 | HSP90AA1,HSP90AB1,HSPA1A/HSPA1B,HSPA8,IFNGR2,IL18,NFKBIA,TP53                                                                                                       |

|                                                                                 |      |        |                                                                                                          |
|---------------------------------------------------------------------------------|------|--------|----------------------------------------------------------------------------------------------------------|
| Role Of Osteoblasts In Rheumatoid Arthritis Signaling Pathway                   | 1.45 | 0.05   | CTSB,CTSE,CTSZ,CXCL8,IL18,IL6,MMP14,RUNX2,TNFSF10,VEGFA,WNT7A,WNT9B                                      |
| Pentose Phosphate Pathway                                                       | 1.45 | 0.182  | TALDO1,TKT                                                                                               |
| Antioxidant Action of Vitamin C                                                 | 1.45 | 0.0625 | HMOX1,NFKBIA,PLAAT4,SELENOT,SLC2A1,TXN,TXNRD1                                                            |
| IL-17A Signaling in Airway Cells                                                | 1.42 | 0.0746 | CXCL1,CXCL3,IL6,NFKBIA,PTEN                                                                              |
| B Cell Development                                                              | 1.42 | 0.087  | HLA-A,HLA-B,HLA-DMA,HLA-DRB1                                                                             |
| iNOS Signaling                                                                  | 1.39 | 0.0851 | CALM1 (includes others),HMGA1,IFNGR2,NFKBIA                                                              |
| Aggrin Interactions at Neuromuscular Junction                                   | 1.38 | 0.0725 | ACTB,CDC42,ERBB4,ITGB1,LAMC1                                                                             |
| PFKFB4 Signaling Pathway                                                        | 1.37 | 0.0833 | PRKAG2,PRKAR1A,TKT,TP53                                                                                  |
| Fcy Receptor-mediated Phagocytosis in Macrophages and Monocytes                 | 1.34 | 0.0638 | ACTB,CDC42,EZR,HMOX1,PTEN,VAV3                                                                           |
| Cholecystokinin/Gastrin-mediated Signaling                                      | 1.33 | 0.0588 | CDC42,IL18,ITPR3,RHOB,RHOC,RHOD,RHOF                                                                     |
| Oleate Biosynthesis II (Animals)                                                | 1.31 | 0.154  | SCD,SCD5                                                                                                 |
| Guanosine Nucleotides Degradation III                                           | 1.31 | 0.154  | GDA,NT5E                                                                                                 |
| IL-10 Signaling                                                                 | 1.31 | 0.0694 | HMOX1,IL18,IL1R1,IL6,NFKBIA                                                                              |
| Melatonin Signaling                                                             | 1.31 | 0.0694 | CALM1 (includes others),GNAI1,GNAI2,PRKAG2,PRKAR1A                                                       |
| Melanoma Signaling                                                              | 1.31 | 0.08   | CCND1,CDKN1A,PTEN,TP53                                                                                   |
| Sphingosine-1-phosphate Signaling                                               | 1.31 | 0.0583 | CDC42,GNAI1,GNAI2,RHOB,RHOC,RHOD,RHOF                                                                    |
| Death Receptor Signaling                                                        | 1.3  | 0.0625 | ACTB,HSPB1,NFKBIA,PARP14,TNFRSF21,TNFSF10                                                                |
| Th1 Pathway                                                                     | 1.28 | 0.0574 | HLA-A,HLA-B,HLA-DMA,HLA-DRB1,IFNGR2,IL18,IL6                                                             |
| CDX Gastrointestinal Cancer Signaling Pathway                                   | 1.26 | 0.0495 | BMP1,CCND1,CXCL8,IL18,IL6,KLF5,PTEN,TNFSF10,WNT7A,WNT9B                                                  |
| Asparagine Degradation I                                                        | 1.26 | 0.5    | ASRGL1                                                                                                   |
| L-cysteine Degradation III                                                      | 1.26 | 0.5    | GOT1                                                                                                     |
| Spermidine Biosynthesis I                                                       | 1.26 | 0.5    | SRM                                                                                                      |
| Cysteine Biosynthesis/Homocysteine Degradation                                  | 1.26 | 0.5    | CBS/LOC102724560                                                                                         |
| GDP-L-fucose Biosynthesis I (from GDP-D-mannose)                                | 1.26 | 0.5    | GFUS                                                                                                     |
| Putrescine Biosynthesis III                                                     | 1.26 | 0.5    | ODC1                                                                                                     |
| Glutamine Degradation I                                                         | 1.26 | 0.5    | GLS                                                                                                      |
| VEGF Signaling                                                                  | 1.25 | 0.0606 | ACTB,ACTN4,FOXO1,HIF1A,SFN,VEGFA                                                                         |
| GPCR-Mediated Integration of Enteroendocrine Signaling Exemplified by an L Cell | 1.25 | 0.0667 | GNAI1,GNAI2,ITPR3,PRKAG2,PRKAR1A                                                                         |
| Dilated Cardiomyopathy Signaling Pathway                                        | 1.25 | 0.0533 | ACTB,ATP2A2,DSG2,ITPR3,MYH10,MYL6,PRKAG2,PRKAR1A                                                         |
| Methylglyoxal Degradation III                                                   | 1.24 | 0.0938 | AKR1B1,AKR1C1,AKR1C2,AKR1C3                                                                              |
| Erythropoietin Signaling Pathway                                                | 1.24 | 0.0508 | CCND1,CXCL8,HIF1A,IL18,IL6,ITPR3,NFKBIA,TNFSF10,TP53                                                     |
| Corticotropin Releasing Hormone Signaling                                       | 1.23 | 0.053  | CALM1 (includes others),GNAI1,GNAI2,ITPR3,PRKAG2,PRKAR1A,SMARCC2,VEGFA                                   |
| ATM Signaling                                                                   | 1.23 | 0.06   | CDKN1A,H2AX,NFKBIA,PPP2R2A,RAD50,TP53                                                                    |
| Pancreatic Adenocarcinoma Signaling                                             | 1.22 | 0.0556 | CCND1,CDC42,CDKN1A,HMOX1,TGFBR2,TP53,VEGFA                                                               |
| Xenobiotic Metabolism Signaling                                                 | 1.21 | 0.0447 | AHR,ALDH1A1,CHST15,FTL,HMOX1,HSP90AA1,HSP90AB1,IL6,NFE2L2,NQO1,PPARGC1A,PPP2R2A,UGT1A9 (includes others) |
| Role of Cytokines in Mediating Communication between Immune Cells               | 1.21 | 0.0741 | CXCL8,IL18,IL32,IL6                                                                                      |
| TREM1 Signaling                                                                 | 1.21 | 0.0649 | CXCL3,CXCL8,IL18,IL6,ITGB1                                                                               |
| GP6 Signaling Pathway                                                           | 1.2  | 0.0551 | CALM1 (includes others),ITGB3,LAMA3,LAMB3,LAMC1,LAMC2,VAV3                                               |
| Cardiac $\beta$ -adrenergic Signaling                                           | 1.2  | 0.05   | AKAP12,ATP2A2,GNAI1,GNAI2,GNB1,PPP1CA,PPP2R2A,PRKAG2,PRKAR1A                                             |
| Telomere Extension by Telomerase                                                | 1.2  | 0.133  | HNRNPA2B1,RAD50                                                                                          |
| IL-7 Signaling Pathway                                                          | 1.19 | 0.0641 | CCND1,CCND3,FOXO1,MET,SLC2A1                                                                             |
| IL-6 Signaling                                                                  | 1.19 | 0.0547 | CXCL8,HSPB1,IL18,IL1R1,IL6,NFKBIA,VEGFA                                                                  |
| Superpathway of Inositol Phosphate Compounds                                    | 1.17 | 0.0462 | ATP1A1,DUSP1,DUSP4,DUSP6,G6PC3,HACD2,PPP1CA,PPP2R2A,PTEN,PTPN1,PTPRM                                     |
| Thyroid Cancer Signaling                                                        | 1.17 | 0.0633 | CCND1,CXCL8,FOXO1,PTEN,TP53                                                                              |
| Extrinsic Prothrombin Activation Pathway                                        | 1.15 | 0.125  | F3,TFPI                                                                                                  |
| fMLP Signaling in Neutrophils                                                   | 1.15 | 0.0534 | CALM1 (includes others),CDC42,GNAI1,GNAI2,GNB1,ITPR3,NFKBIA                                              |
| Role of IL-17A in Arthritis                                                     | 1.14 | 0.0702 | CXCL1,CXCL3,CXCL8,NFKBIA                                                                                 |
| Role of CHK Proteins in Cell Cycle Checkpoint Control                           | 1.12 | 0.069  | CDKN1A,PPP2R2A,RAD50,TP53                                                                                |
| PPAR Signaling                                                                  | 1.12 | 0.0561 | HSP90AA1,HSP90AB1,IL18,IL1R1,NFKBIA,PPARGC1A                                                             |

|                                                                                                       |       |        |                                                                                           |
|-------------------------------------------------------------------------------------------------------|-------|--------|-------------------------------------------------------------------------------------------|
| CCR3 Signaling in Eosinophils                                                                         | 1.11  | 0.0522 | CALM1 (includes others),CFL1,GNAI1,GNAI2,GNB1,ITPR3,MYLK                                  |
| NADH Repair                                                                                           | 1.09  | 0.333  | GAPDH                                                                                     |
| Serine Biosynthesis                                                                                   | 1.09  | 0.333  | PSAT1                                                                                     |
| 1,25-dihydroxyvitamin D3 Biosynthesis                                                                 | 1.09  | 0.333  | POR                                                                                       |
| Hypusine Biosynthesis                                                                                 | 1.09  | 0.333  | EIF5A                                                                                     |
| Glutamate Degradation II                                                                              | 1.09  | 0.333  | GOT1                                                                                      |
| Aspartate Biosynthesis                                                                                | 1.09  | 0.333  | GOT1                                                                                      |
| p70S6K Signaling                                                                                      | 1.09  | 0.0519 | BCAP31,GNAI1,GNAI2,PPP2R2A,SFN,YWHAH,YWHAZ                                                |
| Adipogenesis pathway                                                                                  | 1.09  | 0.0519 | CTBP2,FOXO1,HIF1A,KLF5,NR2F2,TP53,XBP1                                                    |
| Xenobiotic Metabolism PXR Signaling Pathway                                                           | 1.07  | 0.0469 | ALDH1A1,CHST15,HSP90AA1,HSP90AB1,PPARGC1A,PPP1CA,PRKAG2,PRKAR1A,UGT1A9 (includes others)  |
| Regulation Of The Epithelial Mesenchymal Transition By Growth Factors Pathway                         | 1.07  | 0.0469 | CDC42,FGF18,FOXO1,IL6,MET,OCLN,TGFBR2,TNFSF10,VIM                                         |
| IL-17A Signaling in Fibroblasts                                                                       | 1.06  | 0.0789 | IL6,LCN2,NFKBIA                                                                           |
| Differential Regulation of Cytokine Production in Macrophages and T Helper Cells by IL-17A and IL-17F | 1.06  | 0.111  | CXCL1,IL6                                                                                 |
| Bile Acid Biosynthesis, Neutral Pathway                                                               | 1.06  | 0.111  | AKR1C1/AKR1C2,AKR1C3                                                                      |
| Role of Hypercytokinemia/hyperchemokine in the Pathogenesis of Influenza                              | 1.05  | 0.0581 | CXCL3,CXCL8,IL18,IL6,MX1                                                                  |
| Human Embryonic Stem Cell Pluripotency                                                                | 1.05  | 0.0482 | BMP1,FOXO1,GNAI1,GNAI2,GNB1,TGFBR2,WNT7A,WNT9B                                            |
| Role of MAPK Signaling in Promoting the Pathogenesis of Influenza                                     | 1.04  | 0.0536 | ATP6V0C,ATP6V0D1,ATP6V0E1,ATP6V1E1,NFKBIA,PLAAT4                                          |
| PPARα/RXRα Activation                                                                                 | 1.04  | 0.0462 | HSP90AA1,HSP90AB1,IL1R1,IL6,NFKBIA,PPARGC1A,PRKAG2,PRKAR1A,TGFBR2                         |
| BMP signaling pathway                                                                                 | 1.03  | 0.0575 | BMP1,PRKAG2,PRKAR1A,RUNX2,SOSTDC1                                                         |
| Pathogen Induced Cytokine Storm Signaling Pathway                                                     | 1.03  | 0.0403 | C3,CXCL1,CXCL3,CXCL8,FTL1,FTL,HLA-DMA,HLA-DRB1,IFNGR2,IL18,IL1R1,IL6,SLC2A1,TNFSF10,VEGFA |
| Insulin Receptor Signaling                                                                            | 1.03  | 0.05   | FOXO1,GYS1,PPP1CA,PRKAG2,PRKAR1A,PTEN,PTPN1                                               |
| γ-linolenate Biosynthesis II (Animals)                                                                | 1.02  | 0.105  | ACSL1,CYB5R3                                                                              |
| Purine Nucleotides Degradation II (Aerobic)                                                           | 1.02  | 0.105  | GDA,NT5E                                                                                  |
| DNA damage-induced 14-3-3σ Signaling                                                                  | 1.02  | 0.105  | SFN,TP53                                                                                  |
| Sperm Motility                                                                                        | 1.01  | 0.0431 | AXL,CALM1 (includes others),ERBB4,GNAI1,GNAI2,GNB1,ITPR3,MET,PLAAT4,PRKAG2,PRKAR1A        |
| Adrenomedullin signaling pathway                                                                      | 0.996 | 0.0452 | C3,CALM1 (includes others),HIF1A,IL18,ITPR3,MYLK,PRKAG2,PRKAR1A,SMARCC2                   |
| Inflammasome pathway                                                                                  | 0.983 | 0.1    | CTSB,IL18                                                                                 |
| Th1 and Th2 Activation Pathway                                                                        | 0.979 | 0.0465 | HLA-A,HLA-B,HLA-DMA,HLA-DRB1,IFNGR2,IL18,IL6,TGFBR2                                       |
| Heme Degradation                                                                                      | 0.975 | 0.25   | HMOX1                                                                                     |
| Spermine and Spermidine Degradation I                                                                 | 0.975 | 0.25   | SAT1                                                                                      |
| L-cysteine Degradation I                                                                              | 0.975 | 0.25   | GOT1                                                                                      |
| PI3K Signaling in B Lymphocytes                                                                       | 0.971 | 0.0483 | C3,CALM1 (includes others),CD81,ITPR3,NFKBIA,PTEN,VAV3                                    |
| Glutamate Receptor Signaling                                                                          | 0.963 | 0.0606 | CALM1 (includes others),GLS,GNB1,SLC1A1                                                   |
| Androgen Biosynthesis                                                                                 | 0.947 | 0.0952 | AKR1C3,SRD5A3                                                                             |
| Mitotic Roles of Polo-Like Kinase                                                                     | 0.943 | 0.0597 | HSP90AA1,HSP90AB1,PLK2,PPP2R2A                                                            |
| Pyroptosis Signaling Pathway                                                                          | 0.939 | 0.0538 | GBP2,IL18,IL1R1,PRKAG2,PRKAR1A                                                            |
| IL-4 Signaling                                                                                        | 0.939 | 0.0538 | HLA-A,HLA-B,HLA-DMA,HLA-DRB1,HMGA1                                                        |
| p38 MAPK Signaling                                                                                    | 0.939 | 0.05   | DUSP1,HSPB1,IL18,IL1R1,TGFBR2,TP53                                                        |
| Neuroprotective Role of THOP1 in Alzheimer's Disease                                                  | 0.924 | 0.0496 | ECE1,HLA-A,HLA-B,HLA-C,PRKAG2,PRKAR1A                                                     |
| MIF Regulation of Innate Immunity                                                                     | 0.917 | 0.0682 | CD74,NFKBIA,TP53                                                                          |
| G Protein Signaling Mediated by Tubby                                                                 | 0.917 | 0.0682 | GNAI1,GNAI2,GNB1                                                                          |
| Putrescine Degradation III                                                                            | 0.914 | 0.0909 | ALDH1A1,SAT1                                                                              |
| SPINK1 General Cancer Pathway                                                                         | 0.91  | 0.058  | IL6,MT1F,MT1M,MT1X                                                                        |
| Small Cell Lung Cancer Signaling                                                                      | 0.896 | 0.0521 | CCND1,CCND3,NFKBIA,PTEN,TP53                                                              |
| Glioma Signaling                                                                                      | 0.889 | 0.0484 | CALM1 (includes others),CCND1,CCND3,CDKN1A,PTEN,TP53                                      |
| Creatine-phosphate Biosynthesis                                                                       | 0.883 | 0.2    | CKMT1A/CKMT1B                                                                             |
| Superpathway of Serine and Glycine Biosynthesis I                                                     | 0.883 | 0.2    | PSAT1                                                                                     |
| CMP-N-acetylneuraminate Biosynthesis I (Eukaryotes)                                                   | 0.883 | 0.2    | GNE                                                                                       |
| Glutathione Redox Reactions II                                                                        | 0.883 | 0.2    | GSR                                                                                       |

|                                                                                                    |       |        |                                                                                       |
|----------------------------------------------------------------------------------------------------|-------|--------|---------------------------------------------------------------------------------------|
| Tyrosine Degradation I                                                                             | 0.883 | 0.2    | HGD                                                                                   |
| Acetate Conversion to Acetyl-CoA                                                                   | 0.883 | 0.2    | ACSL1                                                                                 |
| Differential Regulation of Cytokine Production in Intestinal Epithelial Cells by IL-17A and IL-17F | 0.879 | 0.087  | CXCL1,LCN2                                                                            |
| The Visual Cycle                                                                                   | 0.879 | 0.087  | AKR1C3,RDH10                                                                          |
| TCA Cycle II (Eukaryotic)                                                                          | 0.879 | 0.087  | ACO1,MDH2                                                                             |
| Apelin Cardiac Fibroblast Signaling Pathway                                                        | 0.879 | 0.087  | IL6,PRKAG2                                                                            |
| Gas Signaling                                                                                      | 0.876 | 0.048  | GNAI1,GNAI2,GNB1,PRKAG2,PRKAR1A,PTH1R                                                 |
| Role of OCT4 in Mammalian Embryonic Stem Cell Pluripotency                                         | 0.873 | 0.0652 | NR2F2,SPP1,TP53                                                                       |
| Basal Cell Carcinoma Signaling                                                                     | 0.86  | 0.0556 | BMP1,TP53,WNT7A,WNT9B                                                                 |
| Role of IL-17F in Allergic Inflammatory Airway Diseases                                            | 0.854 | 0.0638 | CXCL1,CXCL8,IL6                                                                       |
| Ephrin A Signaling                                                                                 | 0.854 | 0.0638 | CDC42,CFL1,VAV3                                                                       |
| Endocannabinoid Developing Neuron Pathway                                                          | 0.854 | 0.0472 | CCND1,GNAI1,GNAI2,GNB1,PRKAG2,PRKAR1A                                                 |
| Necroptosis Signaling Pathway                                                                      | 0.848 | 0.0449 | AXL,DAPK1,TNFSF10,TP53,UBC,VDAC1,VDAC3                                                |
| ERK5 Signaling                                                                                     | 0.83  | 0.0541 | FOSL1,SFN,YWHAH,YWHAZ                                                                 |
| Bupropion Degradation                                                                              | 0.821 | 0.08   | CYP51A1,POR                                                                           |
| CDP-diacylglycerol Biosynthesis I                                                                  | 0.821 | 0.08   | LPCAT1,MBOAT7                                                                         |
| Ethanol Degradation IV                                                                             | 0.821 | 0.08   | ACSL1,ALDH1A1                                                                         |
| Granzyme A Signaling                                                                               | 0.815 | 0.0533 | H1-5,MT-ND1,NDUFB5,NDUFS5                                                             |
| Rapoport-Luebering Glycolytic Shunt                                                                | 0.81  | 0.167  | PGAM1                                                                                 |
| Hepatic Cholestasis                                                                                | 0.796 | 0.0419 | CXCL8,IL18,IL1R1,IL6,NFKBIA,PRKAG2,PRKAR1A,TNFSF10                                    |
| GNRH Signaling                                                                                     | 0.796 | 0.0419 | CALM1 (includes others),CDC42,GNAI1,GNAI2,GNB1,ITPR3,PRKAG2,PRKAR1A                   |
| MYC Mediated Apoptosis Signaling                                                                   | 0.796 | 0.06   | PRKAG2,PRKAR1A,TP53                                                                   |
| IL-17A Signaling in Gastric Cells                                                                  | 0.793 | 0.0769 | CXCL1,CXCL8                                                                           |
| Estrogen-mediated S-phase Entry                                                                    | 0.793 | 0.0769 | CCND1,CDKN1A                                                                          |
| Role of NFAT in Cardiac Hypertrophy                                                                | 0.788 | 0.0405 | CALM1 (includes others),GNAI1,GNAI2,GNB1,IL6,ITPR3,PRKAG2,PRKAR1A,TGFB2               |
| P2Y Purigenic Receptor Signaling Pathway                                                           | 0.788 | 0.0451 | GNAI1,GNAI2,GNB1,ITGB3,PRKAG2,PRKAR1A                                                 |
| Role of MAPK Signaling in Inhibiting the Pathogenesis of Influenza                                 | 0.785 | 0.0519 | CXCL8,IL6,NFKBIA,PLAAT4                                                               |
| TNFR1 Signaling                                                                                    | 0.78  | 0.0588 | CDC42,NFKBIA,TNFAIP3                                                                  |
| NF-κB Activation by Viruses                                                                        | 0.772 | 0.0513 | ITGA3,ITGB1,ITGB3,NFKBIA                                                              |
| Phosphatidylglycerol Biosynthesis II (Non-plastidic)                                               | 0.77  | 0.0741 | LPCAT1,MBOAT7                                                                         |
| Maturity Onset Diabetes of Young (MODY) Signaling                                                  | 0.759 | 0.0506 | APOL1,APOL2,GAPDH,UCP2                                                                |
| Ceramide Biosynthesis                                                                              | 0.75  | 0.143  | SPTLC3                                                                                |
| Glycogen Biosynthesis II (from UDP-D-Glucose)                                                      | 0.75  | 0.143  | GSY1                                                                                  |
| Telomerase Signaling                                                                               | 0.747 | 0.0463 | CDKN1A,HSP90AA1,HSP90AB1,PPP2R2A,TP53                                                 |
| Oxytocin In Brain Signaling Pathway                                                                | 0.745 | 0.0406 | CALM1 (includes others),GNAI1,GNAI2,GNB1,IL6,ITPR3,PLAAT4,PTPN1                       |
| Glutathione Redox Reactions I                                                                      | 0.745 | 0.0714 | GPX1,GSR                                                                              |
| Chemokine Signaling                                                                                | 0.745 | 0.05   | CALM1 (includes others),CFL1,GNAI1,GNAI2                                              |
| Dopamine Receptor Signaling                                                                        | 0.745 | 0.05   | PPP1CA,PPP2R2A,PRKAG2,PRKAR1A                                                         |
| Reelin Signaling in Neurons                                                                        | 0.738 | 0.0435 | ARHGEF38,CDC42,CFL1,ITGA3,ITGB1,MAP1B                                                 |
| White Adipose Tissue Browning Pathway                                                              | 0.738 | 0.0435 | CTBP2,ITPR3,PPARGC1A,PRKAG2,PRKAR1A,VEGFA                                             |
| Phototransduction Pathway                                                                          | 0.728 | 0.0556 | GNB1,PRKAG2,PRKAR1A                                                                   |
| Sonic Hedgehog Signaling                                                                           | 0.721 | 0.069  | PRKAG2,PRKAR1A                                                                        |
| Gai Signaling                                                                                      | 0.719 | 0.0429 | CAV1,GNAI1,GNAI2,GNB1,PRKAG2,PRKAR1A                                                  |
| Apelin Endothelial Signaling Pathway                                                               | 0.71  | 0.0426 | CALM1 (includes others),GNAI1,GNAI2,GNB1,HIF1A,PRKAG2                                 |
| PEDF Signaling                                                                                     | 0.695 | 0.0476 | NFKBIA,SOD2,TP53,WASF2                                                                |
| cAMP-mediated signaling                                                                            | 0.69  | 0.0383 | AKAP12,CALM1 (includes others),DUSP1,DUSP4,DUSP6,GNAI1,GNAI2,PRKAR1A,PTH1R            |
| Xenobiotic Metabolism General Signaling Pathway                                                    | 0.69  | 0.042  | AHR,FTL,HMOX1,NFE2L2,NQO1,UGT1A9 (includes others)                                    |
| Role of Macrophages, Fibroblasts and Endothelial Cells in Rheumatoid Arthritis                     | 0.678 | 0.0361 | CALM1 (includes others),CCND1,CSF1,CXCL8,IL18,IL1R1,IL32,IL6,NFKBIA,VEGFA,WNT7A,WNT9B |
| Nicotine Degradation III                                                                           | 0.668 | 0.0517 | CYP51A1,POR,UGT1A9 (includes others)                                                  |

|                                                                                                                  |       |        |                                                                                                                                   |
|------------------------------------------------------------------------------------------------------------------|-------|--------|-----------------------------------------------------------------------------------------------------------------------------------|
| Cancer Drug Resistance By Drug Efflux Regulation Of The Epithelial Mesenchymal Transition In Development Pathway | 0.668 | 0.0517 | FOXO1,PTEN,TP53                                                                                                                   |
| TNFR2 Signaling                                                                                                  | 0.656 | 0.0625 | NFKBIA,TNFAIP3                                                                                                                    |
| Citrulline Biosynthesis                                                                                          | 0.652 | 0.111  | GLS                                                                                                                               |
| GPCR-Mediated Nutrient Sensing in Enteroendocrine Cells                                                          | 0.642 | 0.0424 | GNAI1,GNAI2,ITPR3,PRKAG2,PRKAR1A                                                                                                  |
| Endometrial Cancer Signaling                                                                                     | 0.638 | 0.05   | CCND1,PTEN,TP53                                                                                                                   |
| PCP (Planar Cell Polarity) Pathway                                                                               | 0.638 | 0.05   | PFN1,WNT7A,WNT9B                                                                                                                  |
| Endocannabinoid Neuronal Synapse Pathway                                                                         | 0.638 | 0.0403 | GNAI1,GNAI2,GNB1,ITPR3,PRKAG2,PRKAR1A                                                                                             |
| Airway Inflammation in Asthma                                                                                    | 0.636 | 0.0606 | CXCL8,IFNGR2                                                                                                                      |
| Opioid Signaling Pathway                                                                                         | 0.613 | 0.0358 | CALM1 (includes others),CDC42,GNAI1,GNAI2,GNB1,ITPR3,NFKBIA,PRKAG2,PRKAR1A,SIGMAR1                                                |
| Melatonin Degradation I                                                                                          | 0.611 | 0.0484 | CYP51A1,POR,UGT1A9 (includes others)                                                                                              |
| Coagulation System                                                                                               | 0.599 | 0.0571 | F3,TFPI                                                                                                                           |
| Ethanol Degradation II                                                                                           | 0.599 | 0.0571 | ACSL1,ALDH1A1                                                                                                                     |
| Synaptogenesis Signaling Pathway                                                                                 | 0.592 | 0.0349 | CALM1 (includes others),CDC42,CDH16,CDH6,CFL1,HSPA8,MAP1B,PRKAG2,PRKAR1A,RAB5C,THBS1                                              |
| Role of Pattern Recognition Receptors in Recognition of Bacteria and Viruses                                     | 0.582 | 0.0385 | C3,CXCL8,IL18,IL6,RIPK2,TNFSF10                                                                                                   |
| Non-Small Cell Lung Cancer Signaling                                                                             | 0.582 | 0.0426 | CCND1,CCND3,ITPR3,TP53                                                                                                            |
| MIF-mediated Glucocorticoid Regulation                                                                           | 0.582 | 0.0556 | CD74,NFKBIA                                                                                                                       |
| Sucrose Degradation V (Mammalian)                                                                                | 0.577 | 0.0909 | ALDOA                                                                                                                             |
| Dolichyl-diphosphooligosaccharide Biosynthesis                                                                   | 0.577 | 0.0909 | ALG3                                                                                                                              |
| ERB2-ERBB3 Signaling                                                                                             | 0.573 | 0.0462 | CCND1,FOXO1,PTEN                                                                                                                  |
| TWEAK Signaling                                                                                                  | 0.565 | 0.0541 | NFKBIA,TNFRSF12A                                                                                                                  |
| TGF- $\beta$ Signaling                                                                                           | 0.562 | 0.0417 | CDC42,RUNX2,TGFBR2,TGIF1                                                                                                          |
| Role of PI3K/AKT Signaling in the Pathogenesis of Influenza                                                      | 0.561 | 0.0455 | GNAI1,GNAI2,NFKBIA                                                                                                                |
| Nicotine Degradation II                                                                                          | 0.561 | 0.0455 | CYP51A1,POR,UGT1A9 (includes others)                                                                                              |
| Xenobiotic Metabolism CAR Signaling Pathway                                                                      | 0.558 | 0.0366 | ALDH1A1,CHST15,HSP90AA1,HSP90AB1,PPARGC1A,PPP2R2A,UGT1A9 (includes others)                                                        |
| Phagosome Formation                                                                                              | 0.551 | 0.0317 | C3,CDC42,CFL1,CLEC4E,GPRC5A,HMOX1,ITGA3,ITGB1,ITGB3,ITGB4,ITGB8,ITPR3,MYH10,MYL12A,MYL12B,MYL6,MYLK,PLAAT4,PTH1R,RXFP1,VAV3,WASF2 |
| Superpathway of Melatonin Degradation                                                                            | 0.55  | 0.0448 | CYP51A1,POR,UGT1A9 (includes others)                                                                                              |
| Cell Cycle Regulation by BTG Family Proteins                                                                     | 0.548 | 0.0526 | CCND1,PPP2R2A                                                                                                                     |
| Hematopoiesis from Multipotent Stem Cells                                                                        | 0.545 | 0.0833 | CSF1                                                                                                                              |
| Neurovascular Coupling Signaling Pathway                                                                         | 0.541 | 0.0354 | CALM1 (includes others),ITPR3,KCNJ1,KCNJ16,PLAAT4,PRKAG2,PRKAR1A,SMARCC2                                                          |
| Breast Cancer Regulation by Stathmin1                                                                            | 0.541 | 0.032  | CCND1,CCND3,GNB1,GPRC5A,HIF1A,PPP1CA,PPP2R2A,PRKAG2,PRKAR1A,PTH1R,RXFP1,TP53,TUBA1A,TUBA1B,TUBA1C,TUBA4A,TUBB,TUBB4B,VEGFA        |
| tRNA Charging                                                                                                    | 0.533 | 0.0513 | GARS1,WARS1                                                                                                                       |
| Regulation of the Epithelial-Mesenchymal Transition Pathway                                                      | 0.532 | 0.0359 | FGF18,HIF1A,MET,PYGO1,TGFBR2,WNT7A,WNT9B                                                                                          |
| Synaptic Long Term Potentiation                                                                                  | 0.529 | 0.0382 | CALM1 (includes others),ITPR3,PPP1CA,PRKAG2,PRKAR1A                                                                               |
| Superpathway of Methionine Degradation                                                                           | 0.519 | 0.05   | CBS/LOC102724560,GOT1                                                                                                             |
| Netrin Signaling                                                                                                 | 0.495 | 0.0417 | ITPR3,PRKAG2,PRKAR1A                                                                                                              |
| Circadian Rhythm Signaling                                                                                       | 0.491 | 0.0336 | CIRBP,GNAI1,GNAI2,GNB1,HIF1A,ITPR3,PRKAG2,PRKAR1A,SMARCC2                                                                         |
| IL-12 Signaling and Production in Macrophages                                                                    | 0.491 | 0.0368 | APOL1,CLU,IL18,NFKBIA,RAB7A                                                                                                       |
| DNA Double-Strand Break Repair by Homologous Recombination                                                       | 0.489 | 0.0714 | RAD50                                                                                                                             |
| DNA Double-Strand Break Repair by Non-Homologous End Joining                                                     | 0.489 | 0.0714 | RAD50                                                                                                                             |
| Acyl-CoA Hydrolysis                                                                                              | 0.489 | 0.0714 | ACOT7                                                                                                                             |
| Urate Biosynthesis/Inosine 5'-phosphate Degradation                                                              | 0.489 | 0.0714 | NT5E                                                                                                                              |
| Phenylalanine Degradation IV (Mammalian, via Side Chain)                                                         | 0.489 | 0.0714 | GOT1                                                                                                                              |
| Colanic Acid Building Blocks Biosynthesis                                                                        | 0.489 | 0.0714 | GFUS                                                                                                                              |
| Th2 Pathway                                                                                                      | 0.484 | 0.0365 | HLA-A,HLA-B,HLA-DMA,HLA-DRB1,TGFBR2                                                                                               |
| CDC42 Signaling                                                                                                  | 0.479 | 0.0312 | CDC42,CDC42SE1,CFL1,HLA-A,HLA-B,HLA-C,HLA-DMA,HLA-DRB1,IQGAP1,ITGA3,ITGB1,ITGB3,ITGB4,ITGB8,MYL12A,MYL12B,MYL6,MYLK               |
| Acetone Degradation I (to Methylglyoxal)                                                                         | 0.476 | 0.0465 | CYP51A1,POR                                                                                                                       |
| TEC Kinase Signaling                                                                                             | 0.476 | 0.0311 | ACTB,CDC42,GNAI1,GNAI2,GNB1,GTTF2,ITGA3,ITGB1,ITGB3,ITGB4,ITGB8,RHOB,RHOC,RHOD,RHOF,TNFRSF21,TNFSF10,VAV3                         |
| Fatty Acid Activation                                                                                            | 0.465 | 0.0667 | ACSL1                                                                                                                             |

|                                                                 |       |        |                                                                                                                                               |
|-----------------------------------------------------------------|-------|--------|-----------------------------------------------------------------------------------------------------------------------------------------------|
| Superpathway of Citrulline Metabolism                           | 0.465 | 0.0667 | GLS                                                                                                                                           |
| Choline Biosynthesis III                                        | 0.465 | 0.0667 | HMOX1                                                                                                                                         |
| BER (Base Excision Repair) Pathway                              | 0.463 | 0.0455 | ARL6IP5,TP53                                                                                                                                  |
| Leptin Signaling in Obesity                                     | 0.456 | 0.0395 | FOXO1,PRKAG2,PRKAR1A                                                                                                                          |
| Antiproliferative Role of Somatostatin Receptor 2               | 0.446 | 0.039  | CDKN1A,GNB1,SMARCC2                                                                                                                           |
| Adenosine Nucleotides Degradation II                            | 0.442 | 0.0625 | NT5E                                                                                                                                          |
| Apelin Pancreas Signaling Pathway                               | 0.439 | 0.0435 | PRKAG2,PRKAR1A                                                                                                                                |
| IL-23 Signaling Pathway                                         | 0.439 | 0.0435 | HIF1A,NFKBIA                                                                                                                                  |
| Kinetochore Metaphase Signaling Pathway                         | 0.435 | 0.036  | H2AC18/H2AC19,H2AX,H2AZ1,PPP1CA                                                                                                               |
| Retinol Biosynthesis                                            | 0.427 | 0.0426 | AKR1C3,RDH10                                                                                                                                  |
| D-myo-inositol (1,3,4)-trisphosphate Biosynthesis               | 0.421 | 0.0588 | PTEN                                                                                                                                          |
| nNOS Signaling in Skeletal Muscle Cells                         | 0.416 | 0.0417 | CALM1 (includes others),ITPR3                                                                                                                 |
| Estrogen-Dependent Breast Cancer Signaling                      | 0.411 | 0.037  | AKR1C1/AKR1C2,CCND1,HSD17B2                                                                                                                   |
| JAK/STAT Signaling                                              | 0.403 | 0.0366 | CDKN1A,IL6,PTPN1                                                                                                                              |
| Amyotrophic Lateral Sclerosis Signaling                         | 0.399 | 0.0345 | GPX1,RAB5C,TP53,VEGFA                                                                                                                         |
| Factors Promoting Cardiogenesis in Vertebrates                  | 0.387 | 0.0329 | BMP1,CCND1,TGFBR2,WNT7A,WNT9B                                                                                                                 |
| Glutaryl-CoA Degradation                                        | 0.384 | 0.0526 | HACD2                                                                                                                                         |
| Mitochondrial L-carnitine Shuttle Pathway                       | 0.384 | 0.0526 | ACSL1                                                                                                                                         |
| Amyloid Processing                                              | 0.384 | 0.0392 | PRKAG2,PRKAR1A                                                                                                                                |
| Type II Diabetes Mellitus Signaling                             | 0.381 | 0.0327 | ACSL1,ITPR3,NFKBIA,PKM,PRKAG2                                                                                                                 |
| Role of NANOG in Mammalian Embryonic Stem Cell Pluripotency     | 0.373 | 0.0333 | BMP1,TP53,WNT7A,WNT9B                                                                                                                         |
| Endothelin-1 Signaling                                          | 0.359 | 0.0312 | ECE1,GNAI1,GNAI2,HMOX1,ITPR3,PLAAT4                                                                                                           |
| IL-15 Production                                                | 0.355 | 0.0325 | AXL,ERBB4,IL6,MET                                                                                                                             |
| Histamine Degradation                                           | 0.352 | 0.0476 | ALDH1A1                                                                                                                                       |
| Fatty Acid $\alpha$ -oxidation                                  | 0.352 | 0.0476 | ALDH1A1                                                                                                                                       |
| Endoplasmic Reticulum Stress Pathway                            | 0.352 | 0.0476 | XBP1                                                                                                                                          |
| Lymphotoxin $\beta$ Receptor Signaling                          | 0.346 | 0.0364 | CXCL1,NFKBIA                                                                                                                                  |
| Synaptic Long Term Depression                                   | 0.34  | 0.0306 | GNAI1,GNAI2,ITPR3,PLAAT4,PPP2R2A,SMARCC2                                                                                                      |
| Superpathway of D-myo-inositol (1,4,5)-trisphosphate Metabolism | 0.337 | 0.0455 | PTEN                                                                                                                                          |
| FAT10 Signaling Pathway                                         | 0.337 | 0.0357 | PSMB2,PSMD8                                                                                                                                   |
| Oxidative Ethanol Degradation III                               | 0.329 | 0.0351 | ACSL1,ALDH1A1                                                                                                                                 |
| Pyrimidine Deoxyribonucleotides De Novo Biosynthesis I          | 0.323 | 0.0435 | CMPK1                                                                                                                                         |
| G-Protein Coupled Receptor Signaling                            | 0.323 | 0.0285 | CALM1 (includes others),CCND1,CDC42,DUSP1,DUSP4,DUSP6,FOXO1,GNAI1,GNAI2,GNB1,GPRC5A,MYL12A,MYL12B,MYL6,MYLK,NFKBIA,PRKAG2,PRKAR1A,PTH1R,RXFP1 |
| ERBB Signaling                                                  | 0.322 | 0.0323 | CDC42,ERBB4,FOXO1                                                                                                                             |
| MSP-RON Signaling Pathway                                       | 0.321 | 0.0345 | ACTB,CSF1                                                                                                                                     |
| Retinoic acid Mediated Apoptosis Signaling                      | 0.305 | 0.0333 | PARP14,TNFSF10                                                                                                                                |
| SPINK1 Pancreatic Cancer Pathway                                | 0.305 | 0.0333 | CTSB,TGFBR2                                                                                                                                   |
| Role of JAK family kinases in IL-6-type Cytokine Signaling      | 0.298 | 0.04   | IL6                                                                                                                                           |
| STAT3 Pathway                                                   | 0.289 | 0.0296 | CDKN1A,IL1R1,TGFBR2,VEGFA                                                                                                                     |
| Role of JAK1, JAK2 and TYK2 in Interferon Signaling             | 0.287 | 0.0385 | IFNGR2                                                                                                                                        |
| Tryptophan Degradation III (Eukaryotic)                         | 0.287 | 0.0385 | HACD2                                                                                                                                         |
| Neuropathic Pain Signaling In Dorsal Horn Neurons               | 0.275 | 0.0297 | ITPR3,PRKAG2,PRKAR1A                                                                                                                          |
| NAD Salvage Pathway II                                          | 0.275 | 0.037  | NT5E                                                                                                                                          |
| Tryptophan Degradation X (Mammalian, via Tryptamine)            | 0.275 | 0.037  | ALDH1A1                                                                                                                                       |
| Pregnenolone Biosynthesis                                       | 0.275 | 0.037  | MICAL2                                                                                                                                        |
| Cysteine Biosynthesis III (mammalia)                            | 0.275 | 0.037  | CBS/LOC102724560                                                                                                                              |
| Activation of IRF by Cytosolic Pattern Recognition Receptors    | 0.268 | 0.0308 | IL6,NFKBIA                                                                                                                                    |
| Induction of Apoptosis by HIV1                                  | 0.268 | 0.0308 | NFKBIA,TP53                                                                                                                                   |
| Histidine Degradation VI                                        | 0.264 | 0.0357 | MICAL2                                                                                                                                        |

|                                                           |       |         |                                                                                                      |
|-----------------------------------------------------------|-------|---------|------------------------------------------------------------------------------------------------------|
| CD40 Signaling                                            | 0.255 | 0.0299  | NFKBIA,TNFAIP3                                                                                       |
| Phospholipases                                            | 0.255 | 0.0299  | HMOX1,PLAAT4                                                                                         |
| Eicosanoid Signaling                                      | 0.249 | 0.0294  | AKR1C3,PLAAT4                                                                                        |
| Role of p14/p19ARF in Tumor Suppression                   | 0.245 | 0.0333  | TP53                                                                                                 |
| Ubiquinol-10 Biosynthesis (Eukaryotic)                    | 0.237 | 0.0323  | MICAL2                                                                                               |
| Serotonin Degradation                                     | 0.231 | 0.0282  | ALDH1A1,UGT1A9 (includes others)                                                                     |
| Dopamine Degradation                                      | 0.228 | 0.0312  | ALDH1A1                                                                                              |
| 4-1BB Signaling in T Lymphocytes                          | 0.212 | 0.0294  | NFKBIA                                                                                               |
| Role of JAK2 in Hormone-like Cytokine Signaling           | 0.212 | 0.0294  | PTPN1                                                                                                |
| Oxytocin In Spinal Neurons Signaling Pathway              | 0.204 | 0.0286  | SMARCC2                                                                                              |
| Fatty Acid $\beta$ -oxidation I                           | 0.204 | 0.0286  | ACSL1                                                                                                |
| Nucleotide Excision Repair Pathway                        | 0.204 | 0.0286  | POLR2C                                                                                               |
| IL-13 Signaling Pathway                                   | 0     | 0.0259  | AGR2,DUSP1,TP53                                                                                      |
| Fc Epsilon RI Signaling                                   | 0     | 0.00847 | VAV3                                                                                                 |
| LPS/IL-1 Mediated Inhibition of RXR Function              | 0     | 0.0276  | ABCC4,ACSL1,ALDH1A1,CHST15,IL18,IL1R1,PPARGC1A                                                       |
| Ceramide Signaling                                        | 0     | 0.011   | PPP2R2A                                                                                              |
| Role of RIG1-like Receptors in Antiviral Innate Immunity  | 0     | 0.0217  | NFKBIA                                                                                               |
| Role of NFAT in Regulation of the Immune Response         | 0     | 0.0186  | CALM1 (includes others),GNAI1,GNAI2,GNB1,HLA-A,HLA-B,HLA-DMA,HLA-DRB1,ITPR3,KPNA2,NFKBIA             |
| Fc $\gamma$ RIIB Signaling in B Lymphocytes               | 0     | 0.0115  | ITPR3                                                                                                |
| LPS-stimulated MAPK Signaling                             | 0     | 0.0235  | CDC42,NFKBIA                                                                                         |
| CCR5 Signaling in Macrophages                             | 0     | 0.01    | CALM1 (includes others),GNAI1,GNAI2,GNB1,ITPR3                                                       |
| Calcium-induced T Lymphocyte Apoptosis                    | 0     | 0.0152  | ATP2A2,CALM1 (includes others),HLA-A,HLA-B,HLA-DMA,HLA-DRB1,ITPR3                                    |
| Cytotoxic T Lymphocyte-mediated Apoptosis of Target Cells | 0     | 0.00706 | HLA-A,HLA-B,HLA-C                                                                                    |
| CD27 Signaling in Lymphocytes                             | 0     | 0.0175  | NFKBIA                                                                                               |
| IL-3 Signaling                                            | 0     | 0.0127  | FOXO1                                                                                                |
| CTLA4 Signaling in Cytotoxic T Lymphocytes                | 0     | 0.0197  | AHR,ARF1,HLA-A,HLA-B,HLA-C,HLA-DMA,HLA-DRB1,HMOX1,ITGA3,ITGB1,PPP2R2A,VAV3                           |
| B Cell Activating Factor Signaling                        | 0     | 0.0233  | NFKBIA                                                                                               |
| T Helper Cell Differentiation                             | 0     | 0.017   | HLA-A,HLA-B,HLA-DMA,HLA-DRB1,IFNGR2,IL18,IL6,TGFB2                                                   |
| Oncostatin M Signaling                                    | 0     | 0.0233  | EPAS1                                                                                                |
| CD28 Signaling in T Helper Cells                          | 0     | 0.0155  | CALM1 (includes others),CDC42,HLA-A,HLA-B,HLA-DMA,HLA-DRB1,ITPR3,NFKBIA                              |
| IL-15 Signaling                                           | 0     | 0.00189 | CXCL8                                                                                                |
| Dendritic Cell Maturation                                 | 0     | 0.0168  | FSCN1,HLA-A,HLA-B,HLA-C,HLA-DMA,HLA-DRB1,IL18,IL32,IL6,NFKBIA                                        |
| Mechanisms of Viral Exit from Host Cells                  | 0     | 0.0244  | ACTB                                                                                                 |
| Angiopoietin Signaling                                    | 0     | 0.0263  | FOXO1,NFKBIA                                                                                         |
| Renin-Angiotensin Signaling                               | 0     | 0.0248  | ITPR3,PRKAG2,PRKAR1A                                                                                 |
| Docosahexaenoic Acid (DHA) Signaling                      | 0     | 0.0263  | FOXO1                                                                                                |
| ICOS-ICOSL Signaling in T Helper Cells                    | 0     | 0.0158  | CALM1 (includes others),HLA-A,HLA-B,HLA-DMA,HLA-DRB1,ITPR3,NFKBIA,PTEN                               |
| Lipid Antigen Presentation by CD1                         | 0     | 0.00241 | PSAP                                                                                                 |
| Melanocyte Development and Pigmentation Signaling         | 0     | 0.0204  | PRKAG2,PRKAR1A                                                                                       |
| DNA Methylation and Transcriptional Repression Signaling  | 0     | 0.0179  | MBD2,TP53                                                                                            |
| Growth Hormone Signaling                                  | 0     | 0.0141  | IGFBP3                                                                                               |
| CREB Signaling in Neurons                                 | 0     | 0.0215  | CALM1 (includes others),GNAI1,GNAI2,GNB1,GPRC5A,ITPR3,POLR2C,PRKAG2,PRKAR1A,PTH1R,RXFP1,TGFB2,V EGFA |
| Type I Diabetes Mellitus Signaling                        | 0     | 0.0157  | HLA-A,HLA-B,HLA-C,HLA-DMA,HLA-DRB1,IFNGR2,IL1R1,NFKBIA                                               |
| Allograft Rejection Signaling                             | 0     | 0.0102  | HLA-A,HLA-B,HLA-C,HLA-DMA,HLA-DRB1                                                                   |
| Autoimmune Thyroid Disease Signaling                      | 0     | 0.0109  | HLA-A,HLA-B,HLA-C,HLA-DMA,HLA-DRB1                                                                   |
| Acute Myeloid Leukemia Signaling                          | 0     | 0.022   | CCND1,PML                                                                                            |
| Graft-versus-Host Disease Signaling                       | 0     | 0.0157  | HLA-A,HLA-B,HLA-C,HLA-DMA,HLA-DRB1,IL18,IL6                                                          |
| Communication between Innate and Adaptive Immune Cells    | 0     | 0.0075  | CXCL8,HLA-A,HLA-B,HLA-C,HLA-DRB1,IL18,IL6                                                            |
| Systemic Lupus Erythematosus Signaling                    | 0     | 0.0222  | HLA-A,HLA-B,HLA-C,HNRNPA2B1,HNRNPC,IL18,IL6,RNU1-2,RNU1-27P,RNU1-28P,RNU1-3,RNU1-4,RNVU1-18,RNVU1-7  |

|                                                                      |   |         |                                                                                                                           |
|----------------------------------------------------------------------|---|---------|---------------------------------------------------------------------------------------------------------------------------|
| FAK Signaling                                                        | 0 | 0.0144  | CCND1,GPRC5A,IL1R1,ITGA3,ITGB1,ITGB3,ITGB4,ITGB8,MET,MMP14,PTEN,PTH1R,RXFP1,TGFB R2,TP53                                  |
| April Mediated Signaling                                             | 0 | 0.0238  | NFKBIA                                                                                                                    |
| Phospholipase C Signaling                                            | 0 | 0.0264  | CALM1 (includes others),CDC42,GNB1,HMOX1,ITGA3,ITGB1,ITGB3,ITGB4,ITGB8,ITPR3,MYL12A,MYL12B,MYL6,RHO B,RHOC,RHOD,RHOF,TGM2 |
| Altered T Cell and B Cell Signaling in Rheumatoid Arthritis          | 0 | 0.0162  | CSF1,HLA-A,HLA-B,HLA-DMA,HLA-DRB1,IL18,IL6,SPP1                                                                           |
| RANK Signaling in Osteoclasts                                        | 0 | 0.022   | CALM1 (includes others),NFKBIA                                                                                            |
| Regulation of IL-2 Expression in Activated and Anergic T Lymphocytes | 0 | 0.0108  | CALM1 (includes others),NFKBIA,TGFB2,TOB1,VAV3                                                                            |
| Role of WNT/GSK-3 $\beta$ Signaling in the Pathogenesis of Influenza | 0 | 0.0256  | WNT7A,WNT9B                                                                                                               |
| NUR77 Signaling in T Lymphocytes                                     | 0 | 0.0136  | CALM1 (includes others),HLA-A,HLA-B,HLA-C,HLA-DMA,HLA-DRB1,TNFSF10                                                        |
| PKC $\theta$ Signaling in T Lymphocytes                              | 0 | 0.0125  | HLA-A,HLA-B,HLA-DMA,HLA-DRB1,ITPR3,NFKBIA,VAV3                                                                            |
| Role of MAPK Signaling in the Pathogenesis of Influenza              | 0 | 0.0122  | PLAAT4                                                                                                                    |
| Antiproliferative Role of TOB in T Cell Signaling                    | 0 | 0.00704 | SKP1,TGFB2,TOB1                                                                                                           |
| OX40 Signaling Pathway                                               | 0 | 0.0125  | HLA-A,HLA-B,HLA-C,HLA-DMA,HLA-DRB1,NFKBIA                                                                                 |
| Assembly of RNA Polymerase II Complex                                | 0 | 0.02    | POLR2C                                                                                                                    |
| Spliceosomal Cycle                                                   | 0 | 0.0204  | HSPA8                                                                                                                     |
| NGF Signaling                                                        | 0 | 0.0167  | CDC42,TP53                                                                                                                |
| Mouse Embryonic Stem Cell Pluripotency                               | 0 | 0.00962 | TP53                                                                                                                      |
| Hematopoiesis from Pluripotent Stem Cells                            | 0 | 0.00674 | CSF1,CXCL8,IL6                                                                                                            |
| nNOS Signaling in Neurons                                            | 0 | 0.0213  | CALM1 (includes others)                                                                                                   |
| VEGF Family Ligand-Receptor Interactions                             | 0 | 0.0238  | NRP1,VEGFA                                                                                                                |
| ERBB4 Signaling                                                      | 0 | 0.0147  | ERBB4                                                                                                                     |
| GDNF Family Ligand-Receptor Interactions                             | 0 | 0.0263  | CDC42,ITPR3                                                                                                               |
| Heparan Sulfate Biosynthesis                                         | 0 | 0.0114  | CHST15                                                                                                                    |
| Thyroid Hormone Metabolism II (via Conjugation and/or Degradation)   | 0 | 0.025   | UGT1A9 (includes others)                                                                                                  |
| Heparan Sulfate Biosynthesis (Late Stages)                           | 0 | 0.0123  | CHST15                                                                                                                    |
| Pyrimidine Ribonucleotides De Novo Biosynthesis                      | 0 | 0.025   | CMPK1                                                                                                                     |
| Pyridoxal 5'-phosphate Salvage Pathway                               | 0 | 0.0154  | DAPK1                                                                                                                     |
| Chondroitin Sulfate Biosynthesis                                     | 0 | 0.0172  | CHST15                                                                                                                    |
| Dermatan Sulfate Biosynthesis                                        | 0 | 0.0167  | CHST15                                                                                                                    |
| Dermatan Sulfate Biosynthesis (Late Stages)                          | 0 | 0.0213  | CHST15                                                                                                                    |
| Salvage Pathways of Pyrimidine Ribonucleotides                       | 0 | 0.0206  | CMPK1,DAPK1                                                                                                               |
| Pyrimidine Ribonucleotides Interconversion                           | 0 | 0.027   | CMPK1                                                                                                                     |
| Chondroitin Sulfate Biosynthesis (Late Stages)                       | 0 | 0.02    | CHST15                                                                                                                    |
| Noradrenaline and Adrenaline Degradation                             | 0 | 0.027   | ALDH1A1                                                                                                                   |
| UVA-Induced MAPK Signaling                                           | 0 | 0.0204  | PARP14,TP53                                                                                                               |
| UVB-Induced MAPK Signaling                                           | 0 | 0.0192  | TP53                                                                                                                      |
| UVC-Induced MAPK Signaling                                           | 0 | 0.0196  | TP53                                                                                                                      |
| EGF Signaling                                                        | 0 | 0.0182  | ITPR3                                                                                                                     |
| SAPK/JNK Signaling                                                   | 0 | 0.00797 | CDC42,DUSP4,GNB1,TP53                                                                                                     |
| FGF Signaling                                                        | 0 | 0.0233  | FGF18,MET                                                                                                                 |
| B Cell Receptor Signaling                                            | 0 | 0.011   | CALM1 (includes others),CDC42,CFL1,FOXO1,NFKBIA,PTEN,VAV3                                                                 |
| Neurotrophin/TRK Signaling                                           | 0 | 0.0128  | CDC42                                                                                                                     |
| Apoptosis Signaling                                                  | 0 | 0.0192  | NFKBIA,TP53                                                                                                               |
| NF- $\kappa$ B Signaling                                             | 0 | 0.0105  | IL18,IL1R1,NFKBIA,TGFB2,TNFAIP3,UBE2V1                                                                                    |
| T Cell Receptor Signaling                                            | 0 | 0.0179  | CALM1 (includes others),DUSP6,HLA-A,HLA-B,HLA-C,HLA-DMA,HLA-DRB1,ITGA3,ITGB1,NFKBIA,VAV3                                  |
| PDGF Signaling                                                       | 0 | 0.0116  | CAV1                                                                                                                      |
| Gustation Pathway                                                    | 0 | 0.0246  | ITPR3,LIPH,LRR8A,PRKAG2,PRKAR1A                                                                                           |
| Th17 Activation Pathway                                              | 0 | 0.0124  | AHR,HIF1A,HSP90AA1,HSP90AB1,IL1R1,IL6                                                                                     |
| NER (Nucleotide Excision Repair, Enhanced Pathway)                   | 0 | 0.0192  | GPS1,POLR2C                                                                                                               |
| T Cell Exhaustion Signaling Pathway                                  | 0 | 0.0194  | FOXO1,HLA-A,HLA-B,HLA-C,HLA-DMA,HLA-DRB1,IL6,MGAT5,PPP2R2A,TGFB2,VEGFA                                                    |



|                                                          |   |        |                                                                                                   |
|----------------------------------------------------------|---|--------|---------------------------------------------------------------------------------------------------|
| Systemic Lupus Erythematosus In T Cell Signaling Pathway | 0 | 0.0264 | CD44,CDC42,EZR,GNAI1,GNAI2,HLA-A,HLA-B,HLA-C,HLA-DMA,HLA-DRB1,IL6,MSN,PPP2R2A,RHOB,RHOC,RHOD,RHOF |
| Systemic Lupus Erythematosus In B Cell Signaling Pathway | 0 | 0.0138 | CALM1 (includes others),CCND1,CCND3,CXCL8,FOXO1,IFNGR2,IL18,IL6,PLAAT4,TNFSF10                    |
| Insulin Secretion Signaling Pathway                      | 0 | 0.0257 | EIF4A1,EIF4G2,ITPR3,PRKAG2,PRKAR1A,SEC61A1,SLC2A1                                                 |
| MSP-ROn Signaling In Macrophages Pathway                 | 0 | 0.0252 | HLA-DMA,HLA-DRB1,IFNGR2                                                                           |
| GM-CSF Signaling                                         | 0 | 0.0143 | CCND1                                                                                             |

Supplementary Table 9: Common differentially expressed genes between P2, P11, and the control.

| Control vs P2 (-iAs) | Control vs P11 (-iAs) | Common ContP2 vs ContP11                   |                                 |
|----------------------|-----------------------|--------------------------------------------|---------------------------------|
| 166 Total Genes      | 69 Total Genes        | 36 Common Genes                            |                                 |
| 136 Genes Down       | 31 Genes Down         | ANLN                                       | <b>Down regulated: 11 genes</b> |
| ACO2                 | ANLN                  | CLDN16                                     | TMEM173                         |
| ACPP                 | CCDC146               | CTSE                                       | THBS1                           |
| ACSL1                | CCDC84                | CYFIP2                                     | PTH1R                           |
| ADIPOR1              | CCNL2                 | IGFBP3                                     | LIX1                            |
| ANLN                 | CDH6                  | KCP                                        | SCD5                            |
| ARHGAP24             | CLDN16                | LIX1                                       | TXNIP                           |
| ATP6V1B1             | CXCL1                 | LRRN4                                      | CLDN16                          |
| B3GALT5              | HERC2P9               | MFAP5                                      | ANLN                            |
| BAG6                 | ITGB3                 | NMNAT2                                     | LRRN4                           |
| BCAM                 | KCP                   | PLK1                                       | PLK1                            |
| BHLHE40              | LENG8                 | PTH1R                                      | KCP                             |
| CBS                  | LIX1                  | RNA5S1                                     |                                 |
| CCND1                | LRRN4                 | RNA5S10                                    | <b>UP regulated: 22 genes</b>   |
| CDH16                | MALT1                 | RNA5S11                                    | RNA5S4                          |
| CEACAM5              | MAP1B                 | RNA5S12                                    | Y_RNA                           |
| CKMT1A               | MYLK                  | RNA5S13                                    | RNA5S12                         |
| CLCN5                | NEAT1                 | RNA5S14                                    | MFAP5                           |
| CLDN16               | NPIPL3                | RNA5S15                                    | SH2D1B                          |
| CNPPD1               | PILRB                 | RNA5S16                                    | RNA5S15                         |
| CREG1                | PLK1                  | RNA5S17                                    | RNA5S2                          |
| CRIM1                | PTH1R                 | RNA5S2                                     | RNA5S13                         |
| CTSL                 | SCD5                  | RNA5S3                                     | RNA5SP149                       |
| CYFIP2               | SMA4                  | RNA5S4                                     | SNORD36C                        |
| CYP51A1              | SNORD41               | RNA5S6                                     | RNA5S3                          |
| DAG1                 | STAG3L1               | RNA5S7                                     | RNA5S1                          |
| DHCR7                | STAG3L3               | RNA5SP149                                  | RNA5S10                         |
| EFHD1                | THBS1                 | SCD5                                       | RNA5S7                          |
| EMP1                 | TIA1                  | SH2D1B                                     | RNA5S14                         |
| EPB41L1              | TMEM173               | SNORA22                                    | SNORA22                         |
| ERMP1                | TXNIP                 | SNORD36C                                   | RNA5S17                         |
| ESRP1                | UCHL1                 | THBS1                                      | U2                              |
| ESRRG                | WSB1                  | TMEM173                                    | RNA5S11                         |
| FABP3                |                       | TXNIP                                      | CTSE                            |
| FGF13                | 38 Genes Up           | U2                                         | RNA5S16                         |
| FGFBP1               | CD68                  | Y_RNA                                      | RNA5S6                          |
| FOLR1                | CDKN1A                |                                            |                                 |
| FYB                  | CLDN10                | Three genes changed between the conditions |                                 |
| GLB1                 | CTSE                  |                                            | IGFBP3                          |

|         |            |        |
|---------|------------|--------|
| GOT1    | CYFIP2     | CYFIP2 |
| GPI     | GCNT3      | NMNAT2 |
| GPNMB   | IGFBP3     |        |
| GPX3    | LCN2       |        |
| GRN     | LGALS3     |        |
| HACD3   | LYPD1      |        |
| HOXA6   | MFAP5      |        |
| HOXA7   | MUC13      |        |
| ICAM1   | NMNAT2     |        |
| IGFBP3  | RDH10      |        |
| IL6     | RNA5S1     |        |
| ITM2C   | RNA5S10    |        |
| KCNJ1   | RNA5S11    |        |
| KCP     | RNA5S12    |        |
| KLK10   | RNA5S13    |        |
| L1CAM   | RNA5S14    |        |
| LDLR    | RNA5S15    |        |
| LDOC1   | RNA5S16    |        |
| LIX1    | RNA5S17    |        |
| LRRC8A  | RNA5S2     |        |
| LRRN4   | RNA5S3     |        |
| LSR     | RNA5S4     |        |
| MAL     | RNA5S6     |        |
| MALL    | RNA5S7     |        |
| MAN1A1  | RNA5SP149  |        |
| MAOA    | RPPH1      |        |
| MBOAT7  | SH2D1B     |        |
| MPC1    | SLC7A11    |        |
| MSMO1   | SNORA22    |        |
| MT1JP   | SNORA47    |        |
| MYD88   | SNORD36C   |        |
| NMNAT2  | ST6GALNAC1 |        |
| NQO1    | U2         |        |
| NUCB1   | UGT1A1     |        |
| OXA1L   | Y_RNA      |        |
| P3H2    |            |        |
| P4HB    |            |        |
| PAQR5   |            |        |
| PDIA3P2 |            |        |
| PHLDA1  |            |        |
| PLAU    |            |        |
| PLK1    |            |        |
| PNPLA6  |            |        |

|          |
|----------|
| PORCN    |
| PPP1CC   |
| PRKCSH   |
| PTH1R    |
| PVR      |
| PVRL2    |
| PXDN     |
| QPCT     |
| QSOX1    |
| RAB17    |
| RAP1GAP  |
| RBM47    |
| RELL1    |
| S100A2   |
| SAA1     |
| SAA2     |
| SCD      |
| SCD5     |
| SDC4     |
| SEMA4A   |
| SERINC2  |
| SIAE     |
| SLC12A1  |
| SLC25A4  |
| SLC35A4  |
| SLC4A11  |
| SLC6A13  |
| SLC7A1   |
| SLC7A5   |
| SLC7A5P2 |
| SNORD1A  |
| SRPR     |
| SUCLG1   |
| SULF2    |
| TACSTD2  |
| TAPBP    |
| TCN2     |
| THBS1    |
| TINAGL1  |
| TM7SF2   |
| TMEM127  |
| TMEM171  |
| TMEM173  |

|             |
|-------------|
| TMEM184B    |
| TMEM45B     |
| TRIOBP      |
| TTYH3       |
| TUBA4A      |
| TXNIP       |
| UBA1        |
| UGT8        |
| USP11       |
| VEPH1       |
| WBP2        |
| WFDC2       |
| 30 Genes Up |
| BNIP3P3     |
| BNIP3P4     |
| BNIP3P7     |
| CTSE        |
| MFAP5       |
| RIMKLB      |
| RNA5S1      |
| RNA5S10     |
| RNA5S11     |
| RNA5S12     |
| RNA5S13     |
| RNA5S14     |
| RNA5S15     |
| RNA5S16     |
| RNA5S17     |
| RNA5S2      |
| RNA5S3      |
| RNA5S4      |
| RNA5S6      |
| RNA5S7      |
| RNA5S9      |
| RNA5SP149   |
| RXFP1       |
| SH2D1B      |
| SLC15A1     |
| SNORA22     |
| SNORD36C    |
| U1          |
| U2          |

---

Y\_RNA

---

Supplementary Table 10: Differentially expressed genes between iAs- and the control.

| probe                   | FC_iASnegVScrl | log2(FC) | raw.pval | #NAME? | Gene Symbol            |
|-------------------------|----------------|----------|----------|--------|------------------------|
| TC1500006925.hg.1       | 0.39778        | -1.33    | 1.40E-08 | 7.8536 | THBS1                  |
| TC0500012107.hg.1       | 0.13483        | -2.8908  | 8.33E-08 | 7.0794 | CXCL14                 |
| TC0800009358.hg.1       | 0.1653         | -2.5969  | 3.98E-07 | 6.3998 |                        |
| TC0500012210.hg.1       | 0.49195        | -1.0234  | 8.43E-07 | 6.0744 | TMEM173                |
| TC0700013623.hg.1       | 0.40809        | -1.293   | 5.42E-06 | 5.2662 | KCP                    |
| TC0600010057.hg.1       | 0.40279        | -1.3119  | 7.87E-06 | 5.1041 | ACAT2                  |
| TC2000008316.hg.1       | 0.3051         | -1.7126  | 1.20E-05 | 4.9195 | LRRN4                  |
| TC0700007814.hg.1       | 2.6008         | 1.379    | 2.41E-05 | 4.6175 | SNORA22                |
| TC0700007796.hg.1       | 2.4548         | 1.2956   | 3.08E-05 | 4.5112 | SNORA22                |
| TC1700008162.hg.1       | 2.0942         | 1.0664   | 3.79E-05 | 4.4216 |                        |
| TC0100015598.hg.1       | 0.32936        | -1.6023  | 4.03E-05 | 4.3945 | TXNIP                  |
| TC1200011009.hg.1       | 2.4323         | 1.2823   | 4.42E-05 | 4.3541 |                        |
| TC2000009317.hg.1       | 0.41179        | -1.28    | 9.22E-05 | 4.0352 | SULF2                  |
| TC0800007715.hg.1       | 0.28487        | -1.8116  | 0.000108 | 3.9653 |                        |
| TSUnmapped00000501.hg.1 | 2.7051         | 1.4357   | 0.000116 | 3.9369 |                        |
| TC0300009853.hg.1       | 0.22216        | -2.1703  | 0.000121 | 3.9171 | CLDN16                 |
| TC0200010468.hg.1       | 2.0108         | 1.0077   | 0.000151 | 3.8221 |                        |
| TC0300007273.hg.1       | 0.3251         | -1.621   | 0.000157 | 3.8038 | PTH1R                  |
| TC1000011646.hg.1       | 3.2108         | 1.6829   | 0.000174 | 3.7582 | RNU2-59P               |
| TC0500012184.hg.1       | 5.3906         | 2.4304   | 0.000218 | 3.6615 | SNORD63                |
| TC0400011180.hg.1       | 0.28467        | -1.8126  | 0.000252 | 3.5978 | SCD5                   |
| TC0500011528.hg.1       | 0.33644        | -1.5716  | 0.000419 | 3.3774 | LIX1                   |
| TC0100017064.hg.1       | 0.473          | -1.0801  | 0.000444 | 3.3526 | NUAK2                  |
| TC2000008315.hg.1       | 0.45394        | -1.1394  | 0.000464 | 3.3334 |                        |
| TC1400008851.hg.1       | 2.4391         | 1.2864   | 0.000533 | 3.2734 |                        |
| TC0100015582.hg.1       | 2.1975         | 1.1359   | 0.000944 | 3.0253 | U1                     |
| TC0300012212.hg.1       | 0.49046        | -1.0278  | 0.000982 | 3.008  | MYLK                   |
| TC1900009438.hg.1       | 2.1706         | 1.1181   | 0.001501 | 2.8237 |                        |
| TC0700013427.hg.1       | 0.4451         | -1.1678  | 0.001733 | 2.7613 | STAG3L5P-PVRIG2P-PILRB |
| TC1500006574.hg.1       | 2.4603         | 1.2989   | 0.002258 | 2.6464 |                        |
| TC0700012967.hg.1       | 2.1632         | 1.1132   | 0.002408 | 2.6184 | RNY1                   |
| TC2100007424.hg.1       | 0.36466        | -1.4554  | 0.00241  | 2.6181 |                        |
| TC1700010767.hg.1       | 3.8412         | 1.9416   | 0.002593 | 2.5861 |                        |
| TC1700010768.hg.1       | 3.8412         | 1.9416   | 0.002593 | 2.5861 |                        |
| TC1700010769.hg.1       | 3.8412         | 1.9416   | 0.002593 | 2.5861 |                        |
| TC1700010770.hg.1       | 3.8412         | 1.9416   | 0.002593 | 2.5861 |                        |
| TC1700010771.hg.1       | 3.8412         | 1.9416   | 0.002593 | 2.5861 |                        |
| TC1700010772.hg.1       | 3.8412         | 1.9416   | 0.002593 | 2.5861 |                        |
| TC1700010773.hg.1       | 3.8412         | 1.9416   | 0.002593 | 2.5861 |                        |
| TC1700010774.hg.1       | 3.8412         | 1.9416   | 0.002593 | 2.5861 |                        |
| TC1700010775.hg.1       | 3.8412         | 1.9416   | 0.002593 | 2.5861 |                        |

|                         |         |         |          |        |              |
|-------------------------|---------|---------|----------|--------|--------------|
| TC1700010776.hg.1       | 3.8412  | 1.9416  | 0.002593 | 2.5861 |              |
| TC1700010778.hg.1       | 3.8412  | 1.9416  | 0.002593 | 2.5861 |              |
| TC1700010779.hg.1       | 3.8412  | 1.9416  | 0.002593 | 2.5861 |              |
| TC1200006520.hg.1       | 0.49341 | -1.0191 | 0.002759 | 2.5593 | TSPAN9       |
| TC1800007655.hg.1       | 2.8116  | 1.4914  | 0.003378 | 2.4713 | LOC100505817 |
| TC2100008391.hg.1       | 0.46359 | -1.1091 | 0.003819 | 2.418  |              |
| TC1700010777.hg.1       | 3.6726  | 1.8768  | 0.004008 | 2.397  |              |
| TC1500008988.hg.1       | 0.44016 | -1.1839 | 0.005073 | 2.2947 | GOLGA8A      |
| TC1500008995.hg.1       | 0.45469 | -1.137  | 0.005299 | 2.2758 | GOLGA8B      |
| TC1100011514.hg.1       | 0.48962 | -1.0303 | 0.006646 | 2.1774 | DHCR7        |
| TC1200006909.hg.1       | 0.42117 | -1.2475 | 0.007424 | 2.1294 | EMPI         |
| TC0600006762.hg.1       | 3.3055  | 1.7249  | 0.021114 | 1.6754 | RNA5SP202    |
| TC0600012117.hg.1       | 2.1354  | 1.0945  | 0.021306 | 1.6715 |              |
| TC0100017626.hg.1       | 3.5405  | 1.8239  | 0.021629 | 1.665  | RNA5S2       |
| TC0100017627.hg.1       | 3.5405  | 1.8239  | 0.021629 | 1.665  | RNA5S3       |
| TC0100017628.hg.1       | 3.5405  | 1.8239  | 0.021629 | 1.665  | RNA5S4       |
| TC0100017629.hg.1       | 3.5405  | 1.8239  | 0.021629 | 1.665  | RNA5S1       |
| TC0100017630.hg.1       | 3.5405  | 1.8239  | 0.021629 | 1.665  | RNA5S6       |
| TC0100017631.hg.1       | 3.5405  | 1.8239  | 0.021629 | 1.665  | RNA5S11      |
| TC0100017632.hg.1       | 3.5405  | 1.8239  | 0.021629 | 1.665  | RNA5S1       |
| TC0100017633.hg.1       | 3.5405  | 1.8239  | 0.021629 | 1.665  | RNA5S10      |
| TC0100017635.hg.1       | 3.5405  | 1.8239  | 0.021629 | 1.665  | RNA5S1       |
| TC0100017642.hg.1       | 3.5405  | 1.8239  | 0.021629 | 1.665  | RNA5S1       |
| TC0100017634.hg.1       | 2.9065  | 1.5393  | 0.028447 | 1.546  | RNA5S9       |
| TC0300013282.hg.1       | 4.3562  | 2.1231  | 0.035269 | 1.4526 | RNA5SP149    |
| TC0100017636.hg.1       | 3.9951  | 1.9982  | 0.035431 | 1.4506 | RNA5S11      |
| TC0100017637.hg.1       | 3.9951  | 1.9982  | 0.035431 | 1.4506 | RNA5S12      |
| TC0100017638.hg.1       | 3.9951  | 1.9982  | 0.035431 | 1.4506 | RNA5S13      |
| TC0100017639.hg.1       | 3.9951  | 1.9982  | 0.035431 | 1.4506 | RNA5S14      |
| TC0100017640.hg.1       | 3.9951  | 1.9982  | 0.035431 | 1.4506 | RNA5S15      |
| TC0100017641.hg.1       | 3.9951  | 1.9982  | 0.035431 | 1.4506 | RNA5S16      |
| TC0100009542.hg.1       | 0.46982 | -1.0898 | 0.036866 | 1.4334 |              |
| TSUnmapped00000920.hg.1 | 4.2077  | 2.073   | 0.044735 | 1.3494 |              |
| TC0100006873.hg.1       | 2.2368  | 1.1614  | 0.047516 | 1.3232 | RNU5E-1      |
| TC1200009834.hg.1       | 8.0835  | 3.015   | 0.0511   | 1.2916 | MFAP5        |
| TC0800011956.hg.1       | 4.1177  | 2.0418  | 0.071119 | 1.148  | MIR7641-1    |



Supplementary Table 11: Differentially expressed genes between HRTPT cells recovery to iAs passage (P2, P11) vs control.

|                           | t.stat  | p.value  | #NAME? | FDR      |
|---------------------------|---------|----------|--------|----------|
| TC1500006925.hg.1         | 29.264  | 1.40E-08 | 7.8536 | 3.50E-05 |
| TC0500012107.hg.1         | 22.63   | 8.33E-08 | 7.0794 | 0.000104 |
| TC0800009358.hg.1         | 18.035  | 3.98E-07 | 6.3998 | 0.000332 |
| TC1100011833.hg.1         | 16.677  | 6.81E-07 | 6.1666 | 0.000421 |
| TC0500012210.hg.1         | 16.167  | 8.43E-07 | 6.0744 | 0.000421 |
| TC0700009597.hg.1         | -14.443 | 1.82E-06 | 5.7404 | 0.000757 |
| TC1200011591.hg.1         | 13.137  | 3.46E-06 | 5.4615 | 0.001234 |
| TC0700013623.hg.1         | 12.289  | 5.42E-06 | 5.2662 | 0.001675 |
| TC0700006567.hg.1         | 12.064  | 6.14E-06 | 5.2121 | 0.001675 |
| TC0500007804.hg.1         | 11.906  | 6.70E-06 | 5.1737 | 0.001675 |
| TC0600010057.hg.1         | 11.624  | 7.87E-06 | 5.1041 | 0.001688 |
| TC0200006891.hg.1         | 11.573  | 8.10E-06 | 5.0913 | 0.001688 |
| TC2000008316.hg.1         | 10.907  | 1.20E-05 | 4.9195 | 0.002314 |
| TC0500011203.hg.1         | -9.867  | 2.34E-05 | 4.6314 | 0.004019 |
| TC0700007814.hg.1         | -9.8193 | 2.41E-05 | 4.6175 | 0.004019 |
| TC2200009230.hg.1         | 9.4814  | 3.04E-05 | 4.5177 | 0.00453  |
| TC0700007796.hg.1         | -9.4596 | 3.08E-05 | 4.5112 | 0.00453  |
| TC1700008162.hg.1         | -9.1656 | 3.79E-05 | 4.4216 | 0.005259 |
| TC0100015598.hg.1         | 9.0783  | 4.03E-05 | 4.3945 | 0.005303 |
| TC1200011009.hg.1         | -8.9494 | 4.42E-05 | 4.3541 | 0.005529 |
| TC0500013205.hg.1         | 8.7915  | 4.97E-05 | 4.3039 | 0.005911 |
| HTA2.pos.PSR01009094.hg.1 | 8.6926  | 5.34E-05 | 4.2721 | 0.006071 |
| TC2000008479.hg.1         | -8.4822 | 6.26E-05 | 4.2034 | 0.006316 |
| TC0700012684.hg.1         | 8.4662  | 6.34E-05 | 4.198  | 0.006316 |
| TSUnmapped00000340.hg.1   | -8.4189 | 6.57E-05 | 4.1824 | 0.006316 |
| TSUnmapped00000845.hg.1   | -8.4189 | 6.57E-05 | 4.1824 | 0.006316 |
| TC1200007387.hg.1         | -8.2193 | 7.67E-05 | 4.1154 | 0.007031 |
| TC0800008314.hg.1         | -8.1845 | 7.88E-05 | 4.1036 | 0.007031 |
| TC2000009317.hg.1         | 7.9855  | 9.22E-05 | 4.0352 | 0.007891 |
| HTA2.pos.PSR05015343.hg.1 | 7.9518  | 9.47E-05 | 4.0235 | 0.007891 |
| TC0200013925.hg.1         | 7.8358  | 0.000104 | 3.9829 | 0.008386 |
| TC0800007715.hg.1         | 7.7861  | 0.000108 | 3.9653 | 0.00846  |
| TC0600012072.hg.1         | 7.7405  | 0.000112 | 3.9491 | 0.008499 |
| TSUnmapped00000501.hg.1   | -7.7065 | 0.000116 | 3.9369 | 0.008499 |
| TC0300009853.hg.1         | 7.6513  | 0.000121 | 3.9171 | 0.008641 |
| TC0400012903.hg.1         | 7.5335  | 0.000134 | 3.8745 | 0.009019 |
| TC0400011580.hg.1         | 7.5135  | 0.000136 | 3.8673 | 0.009019 |
| TC0400012236.hg.1         | -7.5014 | 0.000137 | 3.8628 | 0.009019 |
| TC0700013584.hg.1         | 7.448   | 0.000143 | 3.8433 | 0.009094 |

|                           |         |          |        |          |
|---------------------------|---------|----------|--------|----------|
| TC0500013047.hg.1         | -7.4308 | 0.000146 | 3.8369 | 0.009094 |
| TC0200010468.hg.1         | -7.3906 | 0.000151 | 3.8221 | 0.009181 |
| TC0300007273.hg.1         | 7.3411  | 0.000157 | 3.8038 | 0.009349 |
| TC0300011815.hg.1         | 7.3096  | 0.000161 | 3.792  | 0.009381 |
| TC0600008985.hg.1         | -7.2826 | 0.000165 | 3.7819 | 0.009384 |
| TC1000011646.hg.1         | -7.2195 | 0.000174 | 3.7582 | 0.00969  |
| TC0700006629.hg.1         | 7.172   | 0.000182 | 3.7403 | 0.009878 |
| TC0X00006799.hg.1         | 7.1235  | 0.00019  | 3.7219 | 0.010087 |
| TC0100012278.hg.1         | 7.0745  | 0.000198 | 3.7032 | 0.010311 |
| TC1900011756.hg.1         | 7.0051  | 0.000211 | 3.6765 | 0.01074  |
| TC0500012184.hg.1         | -6.9661 | 0.000218 | 3.6615 | 0.010764 |
| TC0900009489.hg.1         | 6.9464  | 0.000222 | 3.6538 | 0.010764 |
| TC0500012579.hg.1         | 6.936   | 0.000224 | 3.6498 | 0.010764 |
| TC2100007821.hg.1         | -6.8797 | 0.000236 | 3.6278 | 0.010784 |
| HTA2.pos.PSR17024046.hg.1 | 6.8706  | 0.000238 | 3.6243 | 0.010784 |
| TC0X00009356.hg.1         | 6.8579  | 0.00024  | 3.6193 | 0.010784 |
| TC0500008157.hg.1         | 6.8515  | 0.000242 | 3.6168 | 0.010784 |
| TC0400011180.hg.1         | 6.8032  | 0.000252 | 3.5978 | 0.011069 |
| TC1700010693.hg.1         | 6.7762  | 0.000259 | 3.5871 | 0.011149 |
| HTA2.pos.3686585_st       | 6.7284  | 0.00027  | 3.5682 | 0.011323 |
| TC0X00010001.hg.1         | -6.7221 | 0.000272 | 3.5656 | 0.011323 |
| TC0400011931.hg.1         | 6.5645  | 0.000315 | 3.5023 | 0.012886 |
| TC0500011528.hg.1         | 6.2618  | 0.000419 | 3.3774 | 0.016902 |
| TC0100017064.hg.1         | 6.2028  | 0.000444 | 3.3526 | 0.017363 |
| TC1900008824.hg.1         | 6.2013  | 0.000445 | 3.352  | 0.017363 |
| TC2000008315.hg.1         | 6.1576  | 0.000464 | 3.3334 | 0.017842 |
| TC1400008851.hg.1         | -6.0176 | 0.000533 | 3.2734 | 0.019739 |
| TC0M00006432.hg.1         | -6.0154 | 0.000534 | 3.2725 | 0.019739 |
| HTA2.pos.PSR06035602.hg.1 | 6.0095  | 0.000537 | 3.2699 | 0.019739 |
| HTA2.pos.PSR02024033.hg.1 | 5.9676  | 0.00056  | 3.2517 | 0.020285 |
| HTA2.pos.JUC04005577.hg.1 | -5.8885 | 0.000607 | 3.2172 | 0.021652 |
| HTA2.pos.3686576_st       | 5.8279  | 0.000645 | 3.1905 | 0.0227   |
| TC0400007933.hg.1         | 5.8074  | 0.000659 | 3.1814 | 0.022856 |
| TC1700012437.hg.1         | 5.7628  | 0.000689 | 3.1616 | 0.023151 |
| TC0500011233.hg.1         | -5.7448 | 0.000702 | 3.1536 | 0.023151 |
| HTA2.pos.3686574_st       | 5.744   | 0.000703 | 3.1532 | 0.023151 |
| TC0200010410.hg.1         | 5.7422  | 0.000704 | 3.1524 | 0.023151 |
| HTA2.pos.2839528_st       | 5.7184  | 0.000722 | 3.1417 | 0.023171 |
| TC1400009398.hg.1         | -5.7161 | 0.000723 | 3.1407 | 0.023171 |
| TC0300013520.hg.1         | 5.6841  | 0.000748 | 3.1264 | 0.023647 |
| TC1300009757.hg.1         | -5.6247 | 0.000795 | 3.0996 | 0.024133 |
| TC0300011792.hg.1         | -5.6241 | 0.000796 | 3.0993 | 0.024133 |
| TC1000009536.hg.1         | 5.6227  | 0.000797 | 3.0986 | 0.024133 |

|                                    |         |          |        |          |
|------------------------------------|---------|----------|--------|----------|
| TC1800007431.hg.1                  | 5.6171  | 0.000802 | 3.0961 | 0.024133 |
| TC0500010635.hg.1                  | 5.5956  | 0.00082  | 3.0864 | 0.024195 |
| TC1100013022.hg.1                  | 5.5918  | 0.000823 | 3.0846 | 0.024195 |
| TC1600007521.hg.1                  | 5.5679  | 0.000844 | 3.0737 | 0.024326 |
| TC0300012718.hg.1                  | 5.5645  | 0.000847 | 3.0722 | 0.024326 |
| TC0400011349.hg.1                  | 5.4627  | 0.000943 | 3.0254 | 0.026213 |
| TC0100015582.hg.1                  | -5.4623 | 0.000944 | 3.0253 | 0.026213 |
| TC0100015568.hg.1                  | -5.4618 | 0.000944 | 3.025  | 0.026213 |
| TC0300012212.hg.1                  | 5.4251  | 0.000982 | 3.008  | 0.02696  |
| TC0200010443.hg.1                  | 5.3855  | 0.001024 | 2.9896 | 0.027745 |
| HTA2.pos.PSR6_cox_hap2002783.hg.1  | 5.3333  | 0.001084 | 2.9651 | 0.027745 |
| HTA2.pos.PSR6_dbb_hap3002696.hg.1  | 5.3333  | 0.001084 | 2.9651 | 0.027745 |
| HTA2.pos.PSR6_mann_hap4002311.hg.1 | 5.3333  | 0.001084 | 2.9651 | 0.027745 |
| HTA2.pos.PSR6_mcf_hap5002453.hg.1  | 5.3333  | 0.001084 | 2.9651 | 0.027745 |
| HTA2.pos.PSR6_qbl_hap6002764.hg.1  | 5.3333  | 0.001084 | 2.9651 | 0.027745 |
| TC1900008860.hg.1                  | 5.2941  | 0.001131 | 2.9467 | 0.027745 |
| TC0800006760.hg.1                  | 5.282   | 0.001146 | 2.941  | 0.027745 |
| TC1100012226.hg.1                  | -5.2739 | 0.001156 | 2.9372 | 0.027745 |
| TC1400008160.hg.1                  | -5.2506 | 0.001185 | 2.9261 | 0.027745 |
| TC0100015643.hg.1                  | -5.2489 | 0.001188 | 2.9253 | 0.027745 |
| HTA2.pos.PSR06017433.hg.1          | 5.2234  | 0.001221 | 2.9132 | 0.027745 |
| HTA2.pos.PSR6_apd_hap1001142.hg.1  | 5.2234  | 0.001221 | 2.9132 | 0.027745 |
| HTA2.pos.PSR6_cox_hap2002778.hg.1  | 5.2234  | 0.001221 | 2.9132 | 0.027745 |
| HTA2.pos.PSR6_dbb_hap3002691.hg.1  | 5.2234  | 0.001221 | 2.9132 | 0.027745 |
| HTA2.pos.PSR6_mann_hap4002306.hg.1 | 5.2234  | 0.001221 | 2.9132 | 0.027745 |
| HTA2.pos.PSR6_mcf_hap5002448.hg.1  | 5.2234  | 0.001221 | 2.9132 | 0.027745 |
| HTA2.pos.PSR6_qbl_hap6002759.hg.1  | 5.2234  | 0.001221 | 2.9132 | 0.027745 |
| HTA2.pos.PSR6_ssto_hap7002447.hg.1 | 5.2234  | 0.001221 | 2.9132 | 0.027745 |
| TC0100013046.hg.1                  | -5.1313 | 0.001352 | 2.8691 | 0.029149 |
| TC0100013054.hg.1                  | -5.1313 | 0.001352 | 2.8691 | 0.029149 |
| TC0100015533.hg.1                  | -5.1313 | 0.001352 | 2.8691 | 0.029149 |
| TC1_K1270713v1_random00006433.hg.1 | -5.1313 | 0.001352 | 2.8691 | 0.029149 |
| TC1400008912.hg.1                  | -5.1313 | 0.001352 | 2.8691 | 0.029149 |
| HTA2.pos.3080378_st                | 5.1304  | 0.001353 | 2.8687 | 0.029149 |
| TC0700013205.hg.1                  | -5.0925 | 0.001411 | 2.8504 | 0.029788 |
| TC0600010357.hg.1                  | 5.0914  | 0.001413 | 2.8499 | 0.029788 |
| TC2000008055.hg.1                  | 5.0834  | 0.001426 | 2.846  | 0.029788 |
| TSUnmapped00000499.hg.1            | 5.0762  | 0.001437 | 2.8425 | 0.029788 |
| TC2000006736.hg.1                  | 5.0723  | 0.001443 | 2.8406 | 0.029788 |
| TC0400010785.hg.1                  | 5.0656  | 0.001454 | 2.8374 | 0.029788 |
| HTA2.pos.PSR06035604.hg.1          | 5.0532  | 0.001475 | 2.8313 | 0.029959 |
| TC1900009438.hg.1                  | -5.0375 | 0.001501 | 2.8237 | 0.030243 |
| HTA2.pos.2928795_st                | -5.0234 | 0.001525 | 2.8169 | 0.030479 |

|                                    |         |          |        |          |
|------------------------------------|---------|----------|--------|----------|
| HTA2.pos.3686554_st                | 5.0082  | 0.001551 | 2.8094 | 0.030759 |
| HTA2.pos.PSR05013909.hg.1          | -4.9797 | 0.001602 | 2.7955 | 0.031512 |
| TC1300007794.hg.1                  | 4.9504  | 0.001655 | 2.7811 | 0.032319 |
| TC1000008056.hg.1                  | 4.9371  | 0.001681 | 2.7745 | 0.032557 |
| HTA2.pos.2928788_st                | -4.9156 | 0.001722 | 2.7639 | 0.03305  |
| TC0700013427.hg.1                  | 4.9104  | 0.001733 | 2.7613 | 0.03305  |
| HTA2.pos.PSR17024065.hg.1          | 4.8798  | 0.001794 | 2.7462 | 0.033965 |
| HTA2.pos.PSR17024054.hg.1          | 4.8685  | 0.001817 | 2.7406 | 0.034147 |
| TC1400008633.hg.1                  | -4.8343 | 0.00189  | 2.7235 | 0.035247 |
| TC0M00006444.hg.1                  | -4.8148 | 0.001933 | 2.7138 | 0.035781 |
| TC1200009724.hg.1                  | 4.793   | 0.001982 | 2.7029 | 0.036405 |
| HTA2.pos.PSR04018328.hg.1          | 4.7871  | 0.001996 | 2.6999 | 0.036405 |
| TC1400007562.hg.1                  | 4.7105  | 0.002182 | 2.6612 | 0.0379   |
| TC1500006574.hg.1                  | -4.6813 | 0.002258 | 2.6464 | 0.0379   |
| HTA2.pos.PSR15015201.hg.1          | -4.6687 | 0.002291 | 2.64   | 0.0379   |
| HTA2.pos.PSR17024053.hg.1          | 4.6591  | 0.002317 | 2.6351 | 0.0379   |
| HTA2.pos.PSR06017442.hg.1          | 4.6427  | 0.002362 | 2.6267 | 0.0379   |
| HTA2.pos.PSR6_cox_hap2002785.hg.1  | 4.6427  | 0.002362 | 2.6267 | 0.0379   |
| HTA2.pos.PSR6_dbb_hap3002698.hg.1  | 4.6427  | 0.002362 | 2.6267 | 0.0379   |
| HTA2.pos.PSR6_mann_hap4002313.hg.1 | 4.6427  | 0.002362 | 2.6267 | 0.0379   |
| HTA2.pos.PSR6_mcf_hap5002455.hg.1  | 4.6427  | 0.002362 | 2.6267 | 0.0379   |
| HTA2.pos.PSR6_qbl_hap6002766.hg.1  | 4.6427  | 0.002362 | 2.6267 | 0.0379   |
| HTA2.pos.PSR6_ssto_hap7002454.hg.1 | 4.6427  | 0.002362 | 2.6267 | 0.0379   |
| TC0700012967.hg.1                  | -4.6264 | 0.002408 | 2.6184 | 0.0379   |
| TC2100007424.hg.1                  | 4.6258  | 0.00241  | 2.6181 | 0.0379   |
| TC0600009310.hg.1                  | 4.6255  | 0.002411 | 2.6179 | 0.0379   |
| HTA2.pos.PSR05013907.hg.1          | -4.6205 | 0.002425 | 2.6153 | 0.0379   |
| TC0100007075.hg.1                  | -4.6115 | 0.002451 | 2.6107 | 0.0379   |
| TC0100007085.hg.1                  | -4.6115 | 0.002451 | 2.6107 | 0.0379   |
| TC0100009762.hg.1                  | -4.6115 | 0.002451 | 2.6107 | 0.0379   |
| TC1400006877.hg.1                  | -4.6115 | 0.002451 | 2.6107 | 0.0379   |
| TC0400011902.hg.1                  | -4.6103 | 0.002454 | 2.6101 | 0.0379   |
| TC1500006995.hg.1                  | 4.6061  | 0.002466 | 2.608  | 0.0379   |
| TC0400007344.hg.1                  | 4.5667  | 0.002584 | 2.5877 | 0.0379   |
| TC1700010767.hg.1                  | -4.5637 | 0.002593 | 2.5861 | 0.0379   |
| TC1700010768.hg.1                  | -4.5637 | 0.002593 | 2.5861 | 0.0379   |
| TC1700010769.hg.1                  | -4.5637 | 0.002593 | 2.5861 | 0.0379   |
| TC1700010770.hg.1                  | -4.5637 | 0.002593 | 2.5861 | 0.0379   |
| TC1700010771.hg.1                  | -4.5637 | 0.002593 | 2.5861 | 0.0379   |
| TC1700010772.hg.1                  | -4.5637 | 0.002593 | 2.5861 | 0.0379   |
| TC1700010773.hg.1                  | -4.5637 | 0.002593 | 2.5861 | 0.0379   |
| TC1700010774.hg.1                  | -4.5637 | 0.002593 | 2.5861 | 0.0379   |
| TC1700010775.hg.1                  | -4.5637 | 0.002593 | 2.5861 | 0.0379   |

|                                    |         |          |        |          |
|------------------------------------|---------|----------|--------|----------|
| TC1700010776.hg.1                  | -4.5637 | 0.002593 | 2.5861 | 0.0379   |
| TC1700010778.hg.1                  | -4.5637 | 0.002593 | 2.5861 | 0.0379   |
| TC1700010779.hg.1                  | -4.5637 | 0.002593 | 2.5861 | 0.0379   |
| TC0600014276.hg.1                  | -4.53   | 0.0027   | 2.5687 | 0.038139 |
| HTA2.pos.PSR6_cox_hap2002787.hg.1  | 4.5235  | 0.002721 | 2.5653 | 0.038139 |
| HTA2.pos.PSR6_dbb_hap3002700.hg.1  | 4.5235  | 0.002721 | 2.5653 | 0.038139 |
| HTA2.pos.PSR6_mann_hap4002315.hg.1 | 4.5235  | 0.002721 | 2.5653 | 0.038139 |
| HTA2.pos.PSR6_mcf_hap5002457.hg.1  | 4.5235  | 0.002721 | 2.5653 | 0.038139 |
| HTA2.pos.PSR6_qbl_hap6002768.hg.1  | 4.5235  | 0.002721 | 2.5653 | 0.038139 |
| HTA2.pos.PSR6_ssto_hap7002456.hg.1 | 4.5235  | 0.002721 | 2.5653 | 0.038139 |
| HTA2.pos.JUC04005592.hg.1          | -4.5201 | 0.002732 | 2.5635 | 0.038139 |
| TC1200006520.hg.1                  | 4.5119  | 0.002759 | 2.5593 | 0.0383   |
| HTA2.pos.PSR17024051.hg.1          | 4.5054  | 0.00278  | 2.5559 | 0.038385 |
| TC1900009833.hg.1                  | 4.4877  | 0.00284  | 2.5467 | 0.038993 |
| TC0300011273.hg.1                  | 4.4636  | 0.002923 | 2.5341 | 0.039744 |
| TC1700009694.hg.1                  | 4.4627  | 0.002926 | 2.5337 | 0.039744 |
| HTA2.pos.PSR17024059.hg.1          | 4.4446  | 0.002991 | 2.5242 | 0.040405 |
| TC1800007655.hg.1                  | -4.3444 | 0.003378 | 2.4713 | 0.045386 |
| TC0300012089.hg.1                  | 4.3027  | 0.003555 | 2.4492 | 0.047506 |
| TSUnmapped00000961.hg.1            | -4.2935 | 0.003595 | 2.4443 | 0.047792 |
| HTA2.pos.3597911_st                | 4.2574  | 0.003759 | 2.4249 | 0.0497   |
| TC2100008391.hg.1                  | 4.2445  | 0.003819 | 2.418  | 0.050231 |
| TC0100014995.hg.1                  | 4.2263  | 0.003906 | 2.4083 | 0.051105 |
| HTA2.pos.3080369_st                | 4.212   | 0.003976 | 2.4006 | 0.05175  |
| TC1700010777.hg.1                  | -4.2055 | 0.004008 | 2.397  | 0.0519   |
| TC0100012063.hg.1                  | 4.1988  | 0.004042 | 2.3934 | 0.052062 |
| HTA2.pos.3597953_st                | 4.1484  | 0.004304 | 2.3662 | 0.055152 |
| TC0100014276.hg.1                  | 4.1054  | 0.004542 | 2.3428 | 0.057728 |
| TC0X00006739.hg.1                  | 4.1039  | 0.004551 | 2.3419 | 0.057728 |
| HTA2.pos.2839524_st                | 4.0815  | 0.004681 | 2.3297 | 0.059081 |
| TC0400008091.hg.1                  | -4.0511 | 0.004864 | 2.313  | 0.061081 |
| TC1500008988.hg.1                  | 4.0179  | 0.005073 | 2.2947 | 0.063386 |
| TC0800010807.hg.1                  | -4.0116 | 0.005114 | 2.2913 | 0.063571 |
| TC1000010776.hg.1                  | 4.0078  | 0.005139 | 2.2892 | 0.063571 |
| HTA2.pos.PSR10005986.hg.1          | -4.003  | 0.00517  | 2.2865 | 0.063645 |
| HTA2.pos.JUC05009409.hg.1          | -3.9886 | 0.005266 | 2.2785 | 0.06427  |
| TC2200007310.hg.1                  | 3.986   | 0.005283 | 2.2771 | 0.06427  |
| TC1500008995.hg.1                  | 3.9837  | 0.005299 | 2.2758 | 0.06427  |
| TC0800008783.hg.1                  | 3.98    | 0.005324 | 2.2738 | 0.06427  |
| TC0300006723.hg.1                  | -3.9577 | 0.005478 | 2.2614 | 0.065812 |
| HTA2.pos.PSR04010430.hg.1          | -3.9474 | 0.005551 | 2.2557 | 0.066368 |
| TC0800010502.hg.1                  | -3.9228 | 0.005729 | 2.242  | 0.06794  |
| HTA2.pos.PSR06017444.hg.1          | 3.9217  | 0.005736 | 2.2414 | 0.06794  |

|                           |         |          |        |          |
|---------------------------|---------|----------|--------|----------|
| TC2200008703.hg.1         | 3.8431  | 0.006349 | 2.1973 | 0.074843 |
| TC1000007703.hg.1         | 3.8281  | 0.006474 | 2.1888 | 0.075608 |
| HTA2.pos.3080367_st       | 3.8245  | 0.006504 | 2.1868 | 0.075608 |
| TC1900009071.hg.1         | 3.8214  | 0.00653  | 2.1851 | 0.075608 |
| TC0700010538.hg.1         | 3.8208  | 0.006535 | 2.1847 | 0.075608 |
| TC1100011514.hg.1         | 3.8079  | 0.006646 | 2.1774 | 0.076538 |
| TC0500008708.hg.1         | 3.7776  | 0.006914 | 2.1603 | 0.079252 |
| TC0200010275.hg.1         | 3.7733  | 0.006953 | 2.1578 | 0.07934  |
| TC2000007515.hg.1         | 3.7538  | 0.007132 | 2.1468 | 0.081015 |
| TC0100010867.hg.1         | 3.7289  | 0.00737  | 2.1326 | 0.083334 |
| TC1200006909.hg.1         | 3.7233  | 0.007424 | 2.1294 | 0.083569 |
| HTA2.pos.PSR06035600.hg.1 | 3.6783  | 0.007877 | 2.1036 | 0.088272 |
| TC0600011635.hg.1         | 3.6729  | 0.007934 | 2.1005 | 0.088509 |
| TC0900009470.hg.1         | 3.6591  | 0.00808  | 2.0926 | 0.089141 |
| TC0300010086.hg.1         | 3.6583  | 0.008089 | 2.0921 | 0.089141 |
| TC0X00007573.hg.1         | 3.6575  | 0.008097 | 2.0917 | 0.089141 |
| TC0500011668.hg.1         | -3.6471 | 0.008209 | 2.0857 | 0.089975 |
| HTA2.pos.PSR10005983.hg.1 | -3.6421 | 0.008265 | 2.0828 | 0.090188 |
| TC1400007085.hg.1         | -3.6379 | 0.00831  | 2.0804 | 0.090292 |
| TC0200011503.hg.1         | 3.623   | 0.008476 | 2.0718 | 0.091694 |
| TC0700013428.hg.1         | 3.6154  | 0.008562 | 2.0674 | 0.092226 |
| HTA2.pos.2839538_st       | 3.5906  | 0.00885  | 2.0531 | 0.094564 |
| TC1700011449.hg.1         | 3.5902  | 0.008855 | 2.0528 | 0.094564 |
| TC1100006494.hg.1         | 3.5863  | 0.008901 | 2.0506 | 0.094649 |
| HTA2.pos.PSR09016040.hg.1 | 3.5784  | 0.008996 | 2.046  | 0.095253 |
| TC1400010743.hg.1         | -3.5748 | 0.009039 | 2.0439 | 0.095311 |
| HTA2.pos.2891951_st       | -3.5674 | 0.009129 | 2.0396 | 0.095856 |
| TC2000009949.hg.1         | 3.5427  | 0.009435 | 2.0253 | 0.098655 |
| TC1100013110.hg.1         | 3.5381  | 0.009494 | 2.0226 | 0.098854 |
| TC0400010282.hg.1         | -3.4727 | 0.010368 | 1.9843 | 0.10751  |
| HTA2.pos.3045353_st       | 3.4607  | 0.010537 | 1.9773 | 0.10881  |
| TC1700008886.hg.1         | 3.4544  | 0.010627 | 1.9736 | 0.10916  |
| TC1000008031.hg.1         | 3.4433  | 0.010789 | 1.967  | 0.10916  |
| TC1200008539.hg.1         | 3.4433  | 0.010789 | 1.967  | 0.10916  |
| TC1700008713.hg.1         | 3.4433  | 0.010789 | 1.967  | 0.10916  |
| TC2000006547.hg.1         | 3.4433  | 0.010789 | 1.967  | 0.10916  |
| TC0500011596.hg.1         | 3.4395  | 0.010844 | 1.9648 | 0.10927  |
| TC1400008586.hg.1         | -3.4337 | 0.01093  | 1.9614 | 0.10969  |
| HTA2.pos.PSR03004164.hg.1 | -3.4206 | 0.011127 | 1.9536 | 0.11084  |
| TC0100012754.hg.1         | 3.4202  | 0.011133 | 1.9534 | 0.11084  |
| HTA2.pos.PSR08018865.hg.1 | -3.4059 | 0.011351 | 1.945  | 0.11257  |
| TC1700008704.hg.1         | 3.3967  | 0.011494 | 1.9395 | 0.11353  |
| TC1400009732.hg.1         | 3.3863  | 0.011658 | 1.9334 | 0.1147   |

|                                     |         |          |        |         |
|-------------------------------------|---------|----------|--------|---------|
| TC1200006604.hg.1                   | 3.3756  | 0.011829 | 1.927  | 0.11576 |
| TC0100013692.hg.1                   | 3.3738  | 0.011858 | 1.926  | 0.11576 |
| TC1700010414.hg.1                   | -3.3531 | 0.012198 | 1.9137 | 0.11859 |
| HTA2.pos.2985932_st                 | 3.3464  | 0.012311 | 1.9097 | 0.11859 |
| TC1200008556.hg.1                   | -3.3393 | 0.012431 | 1.9055 | 0.11859 |
| TC0800007957.hg.1                   | -3.3336 | 0.01253  | 1.9021 | 0.11859 |
| HTA2.pos.PSR02024018.hg.1           | 3.3281  | 0.012624 | 1.8988 | 0.11859 |
| TC0100006815.hg.1                   | -3.3227 | 0.012718 | 1.8956 | 0.11859 |
| TC0300009631.hg.1                   | -3.3227 | 0.012718 | 1.8956 | 0.11859 |
| TC1000006820.hg.1                   | -3.3227 | 0.012718 | 1.8956 | 0.11859 |
| TC1400006852.hg.1                   | -3.3227 | 0.012718 | 1.8956 | 0.11859 |
| TC1900006496.hg.1                   | -3.3227 | 0.012718 | 1.8956 | 0.11859 |
| TC1900006506.hg.1                   | -3.3227 | 0.012718 | 1.8956 | 0.11859 |
| TSUnmapped00000838.hg.1             | -3.3227 | 0.012718 | 1.8956 | 0.11859 |
| TC0600012754.hg.1                   | 3.3116  | 0.012912 | 1.889  | 0.11995 |
| TC0200014085.hg.1                   | 3.3042  | 0.013045 | 1.8846 | 0.12074 |
| TC0500009768.hg.1                   | 3.2949  | 0.013214 | 1.879  | 0.12185 |
| TC1400010745.hg.1                   | -3.2877 | 0.013345 | 1.8747 | 0.12219 |
| TC0100010166.hg.1                   | 3.2875  | 0.013348 | 1.8746 | 0.12219 |
| TC1000008318.hg.1                   | -3.2731 | 0.013615 | 1.866  | 0.12418 |
| TC0100013083.hg.1                   | 3.2535  | 0.013989 | 1.8542 | 0.12712 |
| TC1400007096.hg.1                   | -3.2381 | 0.01429  | 1.845  | 0.12939 |
| TC0Y00007157.hg.1                   | 3.2341  | 0.01437  | 1.8426 | 0.12964 |
| TC1400009529.hg.1                   | 3.2159  | 0.014737 | 1.8316 | 0.13217 |
| TC1100007262.hg.1                   | 3.215   | 0.014756 | 1.831  | 0.13217 |
| TC1300007491.hg.1                   | -3.2113 | 0.014831 | 1.8288 | 0.13237 |
| TC0400011297.hg.1                   | -3.1706 | 0.015694 | 1.8043 | 0.13957 |
| TC1700010677.hg.1                   | 3.1628  | 0.015867 | 1.7995 | 0.14061 |
| TC0X00010849.hg.1                   | 3.1536  | 0.016072 | 1.7939 | 0.14192 |
| HTA2.pos.3686578_st                 | 3.1499  | 0.016155 | 1.7917 | 0.14216 |
| HTA2.pos.PSR02024013.hg.1           | 3.137   | 0.016447 | 1.7839 | 0.14421 |
| TC1600011418.hg.1                   | 3.1187  | 0.016874 | 1.7728 | 0.14696 |
| TC1700008760.hg.1                   | 3.1186  | 0.016877 | 1.7727 | 0.14696 |
| HTA2.pos.3686564_st                 | 3.0864  | 0.017655 | 1.7531 | 0.15319 |
| TC1700007416.hg.1                   | 3.0652  | 0.018191 | 1.7401 | 0.15625 |
| TC22_KI270733v1_random00006443.hg.1 | -3.065  | 0.018195 | 1.7401 | 0.15625 |
| TCUn_GL000220v100006442.hg.1        | -3.065  | 0.018195 | 1.7401 | 0.15625 |
| HTA2.pos.PSR01009074.hg.1           | 3.0549  | 0.018455 | 1.7339 | 0.15794 |
| TC0100011406.hg.1                   | -3.0456 | 0.018699 | 1.7282 | 0.15948 |
| TC1000010368.hg.1                   | 3.0287  | 0.019149 | 1.7179 | 0.15999 |
| TC0600010690.hg.1                   | 3.0219  | 0.019334 | 1.7137 | 0.15999 |
| TC0600013613.hg.1                   | 3.0219  | 0.019334 | 1.7137 | 0.15999 |
| TC1200011072.hg.1                   | 3.0219  | 0.019334 | 1.7137 | 0.15999 |

|                           |         |          |        |         |
|---------------------------|---------|----------|--------|---------|
| TC1300009866.hg.1         | 3.0219  | 0.019334 | 1.7137 | 0.15999 |
| TC1600011095.hg.1         | 3.0219  | 0.019334 | 1.7137 | 0.15999 |
| TC1900011893.hg.1         | 3.0219  | 0.019334 | 1.7137 | 0.15999 |
| TC2000008178.hg.1         | 3.0219  | 0.019334 | 1.7137 | 0.15999 |
| TC2200008809.hg.1         | 3.0219  | 0.019334 | 1.7137 | 0.15999 |
| TC1100012121.hg.1         | 3.0155  | 0.019511 | 1.7097 | 0.16092 |
| TC0100008145.hg.1         | 3.0049  | 0.019803 | 1.7033 | 0.16279 |
| TC2100007491.hg.1         | 2.9924  | 0.020157 | 1.6956 | 0.16515 |
| TC0200014994.hg.1         | -2.9673 | 0.020889 | 1.6801 | 0.16682 |
| TC0700012465.hg.1         | -2.9673 | 0.020889 | 1.6801 | 0.16682 |
| TC0X00010986.hg.1         | -2.9673 | 0.020889 | 1.6801 | 0.16682 |
| TC1400008874.hg.1         | -2.9673 | 0.020889 | 1.6801 | 0.16682 |
| TC1500009854.hg.1         | -2.9673 | 0.020889 | 1.6801 | 0.16682 |
| TC0X00009238.hg.1         | 2.9644  | 0.020974 | 1.6783 | 0.16682 |
| TC0600006762.hg.1         | -2.9597 | 0.021114 | 1.6754 | 0.16682 |
| TC0500013229.hg.1         | 2.9551  | 0.021252 | 1.6726 | 0.16682 |
| TC0600012117.hg.1         | -2.9533 | 0.021306 | 1.6715 | 0.16682 |
| TC0100017626.hg.1         | -2.9427 | 0.021629 | 1.665  | 0.16682 |
| TC0100017627.hg.1         | -2.9427 | 0.021629 | 1.665  | 0.16682 |
| TC0100017628.hg.1         | -2.9427 | 0.021629 | 1.665  | 0.16682 |
| TC0100017629.hg.1         | -2.9427 | 0.021629 | 1.665  | 0.16682 |
| TC0100017630.hg.1         | -2.9427 | 0.021629 | 1.665  | 0.16682 |
| TC0100017631.hg.1         | -2.9427 | 0.021629 | 1.665  | 0.16682 |
| TC0100017632.hg.1         | -2.9427 | 0.021629 | 1.665  | 0.16682 |
| TC0100017633.hg.1         | -2.9427 | 0.021629 | 1.665  | 0.16682 |
| TC0100017635.hg.1         | -2.9427 | 0.021629 | 1.665  | 0.16682 |
| TC0100017642.hg.1         | -2.9427 | 0.021629 | 1.665  | 0.16682 |
| TC1200007826.hg.1         | -2.9385 | 0.02176  | 1.6623 | 0.16709 |
| TC0100014934.hg.1         | -2.9373 | 0.021797 | 1.6616 | 0.16709 |
| TC0300012773.hg.1         | 2.9182  | 0.022397 | 1.6498 | 0.17116 |
| TC1500009250.hg.1         | 2.9021  | 0.022919 | 1.6398 | 0.17411 |
| HTA2.pos.PSR15015202.hg.1 | -2.9019 | 0.022922 | 1.6397 | 0.17411 |
| TC1700007319.hg.1         | 2.8972  | 0.023077 | 1.6368 | 0.17476 |
| TC1200007626.hg.1         | 2.8841  | 0.023512 | 1.6287 | 0.17742 |
| TC1900008878.hg.1         | 2.8824  | 0.02357  | 1.6276 | 0.17742 |
| TC0400009221.hg.1         | 2.8779  | 0.023724 | 1.6248 | 0.17757 |
| HTA2.pos.PSR15015197.hg.1 | -2.8776 | 0.023733 | 1.6246 | 0.17757 |
| TC1000008951.hg.1         | -2.8719 | 0.023927 | 1.6211 | 0.17849 |
| TC2000010027.hg.1         | 2.8621  | 0.024266 | 1.615  | 0.18007 |
| TC0100013203.hg.1         | -2.8616 | 0.024283 | 1.6147 | 0.18007 |
| TC0800009519.hg.1         | -2.8516 | 0.024632 | 1.6085 | 0.18212 |
| TC1000006969.hg.1         | -2.843  | 0.024937 | 1.6032 | 0.18381 |
| TC0900007028.hg.1         | 2.841   | 0.025008 | 1.6019 | 0.18381 |



|                              |         |          |        |         |
|------------------------------|---------|----------|--------|---------|
| TC1000008159.hg.1            | -2.8337 | 0.025272 | 1.5974 | 0.18472 |
| TC1000008054.hg.1            | 2.8322  | 0.025327 | 1.5964 | 0.18472 |
| HTA2.pos.3045314_st          | 2.8314  | 0.025354 | 1.5959 | 0.18472 |
| TC1700010492.hg.1            | 2.8117  | 0.026083 | 1.5836 | 0.18931 |
| HTA2.pos.PSR10005982.hg.1    | -2.8103 | 0.026135 | 1.5828 | 0.18931 |
| TC0200015242.hg.1            | 2.8     | 0.026523 | 1.5764 | 0.19156 |
| TC0300010122.hg.1            | 2.7933  | 0.02678  | 1.5722 | 0.19286 |
| TC0X00007191.hg.1            | 2.7847  | 0.027115 | 1.5668 | 0.19405 |
| HTA2.pos.PSR07022143.hg.1    | 2.7839  | 0.027147 | 1.5663 | 0.19405 |
| TC2000010026.hg.1            | 2.7831  | 0.027177 | 1.5658 | 0.19405 |
| HTA2.pos.PSR02024022.hg.1    | 2.7777  | 0.027388 | 1.5624 | 0.195   |
| TC1000011938.hg.1            | 2.773   | 0.027573 | 1.5595 | 0.19576 |
| TC0500006476.hg.1            | 2.7709  | 0.027658 | 1.5582 | 0.1958  |
| HTA2.pos.3271672_st          | -2.7688 | 0.027741 | 1.5569 | 0.19583 |
| TC1100010455.hg.1            | 2.7552  | 0.028289 | 1.5484 | 0.19914 |
| TC0100017634.hg.1            | -2.7514 | 0.028447 | 1.546  | 0.19969 |
| TC0200015248.hg.1            | 2.7139  | 0.030031 | 1.5224 | 0.21021 |
| HTA2.pos.2891949_st          | -2.7114 | 0.030139 | 1.5209 | 0.21038 |
| TC1800007680.hg.1            | 2.7085  | 0.030265 | 1.5191 | 0.21068 |
| TC0900007033.hg.1            | 2.6958  | 0.030824 | 1.5111 | 0.21397 |
| TC0200011720.hg.1            | -2.6805 | 0.031515 | 1.5015 | 0.21816 |
| TC2200007054.hg.1            | -2.6782 | 0.031621 | 1.5    | 0.21829 |
| TC0700006640.hg.1            | 2.6724  | 0.031889 | 1.4964 | 0.21954 |
| HTA2.pos.PSR01009067.hg.1    | 2.6683  | 0.03208  | 1.4938 | 0.22024 |
| TC1900010738.hg.1            | 2.665   | 0.032234 | 1.4917 | 0.22069 |
| TC0600008379.hg.1            | -2.6598 | 0.032476 | 1.4884 | 0.22129 |
| TC1900007012.hg.1            | 2.6593  | 0.032498 | 1.4881 | 0.22129 |
| TC1500010197.hg.1            | 2.6491  | 0.032987 | 1.4817 | 0.22401 |
| HTA2.pos.JUC03002217.hg.1    | -2.6466 | 0.033106 | 1.4801 | 0.22421 |
| HTA2.pos.3255800_st          | -2.6409 | 0.033378 | 1.4765 | 0.22544 |
| TCUn_GL000220v100006441.hg.1 | -2.6313 | 0.033851 | 1.4704 | 0.22801 |
| TC1500006842.hg.1            | -2.6206 | 0.034382 | 1.4637 | 0.23097 |
| TC0700006648.hg.1            | 2.6098  | 0.034924 | 1.4569 | 0.23217 |
| TC0300013282.hg.1            | -2.603  | 0.035269 | 1.4526 | 0.23217 |
| TC0200009857.hg.1            | -2.6003 | 0.035412 | 1.4509 | 0.23217 |
| TC0100017636.hg.1            | -2.5999 | 0.035431 | 1.4506 | 0.23217 |
| TC0100017637.hg.1            | -2.5999 | 0.035431 | 1.4506 | 0.23217 |
| TC0100017638.hg.1            | -2.5999 | 0.035431 | 1.4506 | 0.23217 |
| TC0100017639.hg.1            | -2.5999 | 0.035431 | 1.4506 | 0.23217 |
| TC0100017640.hg.1            | -2.5999 | 0.035431 | 1.4506 | 0.23217 |
| TC0100017641.hg.1            | -2.5999 | 0.035431 | 1.4506 | 0.23217 |
| TC0200007237.hg.1            | 2.5987  | 0.03549  | 1.4499 | 0.23217 |
| TC0100007898.hg.1            | 2.5942  | 0.035725 | 1.447  | 0.2331  |

|                           |         |          |        |         |
|---------------------------|---------|----------|--------|---------|
| TC1300007752.hg.1         | -2.5909 | 0.035897 | 1.4449 | 0.23361 |
| TC1100006911.hg.1         | -2.583  | 0.036312 | 1.44   | 0.2357  |
| TC0600012753.hg.1         | 2.5786  | 0.036544 | 1.4372 | 0.23659 |
| TC0100009542.hg.1         | 2.5726  | 0.036866 | 1.4334 | 0.23805 |
| TC0X00010608.hg.1         | -2.5676 | 0.037138 | 1.4302 | 0.2392  |
| TC1500007510.hg.1         | 2.5587  | 0.037623 | 1.4245 | 0.2417  |
| TC0400012829.hg.1         | 2.5568  | 0.03773  | 1.4233 | 0.24176 |
| HTA2.pos.3525998_st       | -2.5539 | 0.037888 | 1.4215 | 0.24215 |
| TC0600009007.hg.1         | 2.5502  | 0.038091 | 1.4192 | 0.24283 |
| HTA2.pos.PSR02004954.hg.1 | -2.5368 | 0.038842 | 1.4107 | 0.2469  |
| TC1600010357.hg.1         | 2.5354  | 0.038927 | 1.4097 | 0.2469  |
| TC0300012216.hg.1         | 2.5264  | 0.039441 | 1.4041 | 0.24952 |
| TC1700008986.hg.1         | 2.5162  | 0.040032 | 1.3976 | 0.25262 |
| HTA2.pos.PSR08018863.hg.1 | -2.5088 | 0.040469 | 1.3929 | 0.25474 |
| HTA2.pos.PSR03029262.hg.1 | -2.4964 | 0.041206 | 1.385  | 0.25873 |
| TC1200010662.hg.1         | 2.494   | 0.041357 | 1.3835 | 0.25902 |
| TC1200011527.hg.1         | -2.4782 | 0.04232  | 1.3735 | 0.26439 |
| TC1200007605.hg.1         | 2.4741  | 0.042579 | 1.3708 | 0.26496 |
| TC1100010087.hg.1         | -2.4734 | 0.042622 | 1.3704 | 0.26496 |
| TSUnmapped00000831.hg.1   | -2.4696 | 0.04286  | 1.3679 | 0.26578 |
| TC0M00006441.hg.1         | -2.4663 | 0.043066 | 1.3659 | 0.26639 |
| HTA2.pos.2928786_st       | -2.4635 | 0.043242 | 1.3641 | 0.26682 |
| TC0500007761.hg.1         | 2.4496  | 0.04413  | 1.3553 | 0.27163 |
| TSUnmapped00000920.hg.1   | -2.4404 | 0.044735 | 1.3494 | 0.27468 |
| TC0200016202.hg.1         | 2.4316  | 0.045312 | 1.3438 | 0.27753 |
| TC0700007431.hg.1         | 2.4269  | 0.045627 | 1.3408 | 0.27878 |
| TC0800008245.hg.1         | 2.4247  | 0.045775 | 1.3394 | 0.27881 |
| TC0200015178.hg.1         | 2.4235  | 0.045854 | 1.3386 | 0.27881 |
| TC0100007008.hg.1         | 2.4194  | 0.046132 | 1.336  | 0.27981 |
| TC0700011835.hg.1         | 2.4109  | 0.04671  | 1.3306 | 0.28264 |
| HTA2.pos.3045327_st       | 2.4056  | 0.047077 | 1.3272 | 0.28286 |
| HTA2.pos.PSR05013906.hg.1 | -2.4056 | 0.047078 | 1.3272 | 0.28286 |
| TC1700010994.hg.1         | 2.4055  | 0.047087 | 1.3271 | 0.28286 |
| TC0100006873.hg.1         | -2.3993 | 0.047516 | 1.3232 | 0.28475 |
| HTA2.pos.3045312_st       | 2.3949  | 0.047826 | 1.3203 | 0.28593 |
| TC0500011775.hg.1         | -2.39   | 0.048169 | 1.3172 | 0.28729 |
| TC0100016694.hg.1         | 2.3882  | 0.048296 | 1.3161 | 0.28736 |
| HTA2.pos.PSR09016043.hg.1 | 2.3864  | 0.048427 | 1.3149 | 0.28746 |
| TC1900010452.hg.1         | 2.384   | 0.048598 | 1.3134 | 0.28779 |
| HTA2.pos.3597957_st       | 2.382   | 0.048738 | 1.3121 | 0.28793 |
| TC0400011560.hg.1         | 2.3767  | 0.049121 | 1.3087 | 0.28951 |
| TC0700007897.hg.1         | -2.3666 | 0.049855 | 1.3023 | 0.29293 |

Supplementary Table 12: Reactome and Panther pathway analysis of 36 Common gene HRTPT cells recovery to iAs passage P2, P11

## Reactome Pathways

Pathway name p-value FDR

Molecules associated with elastic fibres 1.13e-04 0.065

Glucuronidation 3.69e-04 0.065

Elastic fibre formation 4.25e-04 0.065

Transcriptional activation of cell cycle inhibitor p21 5.31e-04 0.065

Transcriptional activation of p53 responsive genes 5.31e-04 0.065

Aspirin ADME 0.001 0.134

TP53 Regulates Transcription of Genes Involved in G1 Cell Cycle Arrest  
0.003 0.289

Heme degradation 0.005 0.391

Interleukin-4 and Interleukin-13 signaling 0.009 0.468

Defective UGT1A4 causes hyperbilirubinemia 0.009 0.468

Defective UGT1A1 causes hyperbilirubinemia 0.009 0.468

Paracetamol ADME 0.009 0.468

Drug ADME 0.012 0.468

O-linked glycosylation of mucins 0.012 0.468

FOXO-mediated transcription of cell cycle genes 0.014 0.468

RUNX3 regulates CDKN1A transcription 0.014 0.468

p53-Dependent G1/S DNA damage checkpoint 0.018 0.468

p53-Dependent G1 DNA Damage Response 0.018 0.468

## Panther

Biological Processes (>3 Genes)

Biological Regulation (7)

Cellular Process (9)

Developmental Process (4)

Multicellular Organismal Process (4)

Response to Stimulus (5)

Signaling (4)

Molecular Function (> 2 Genes)

Binding (9)

Molecular Function Regulator (3)

Molecular Transducer Activity (3)

Protein Class (> 2 genes)

None

Pathways (> 1 Gene)

None

Supplementary Table 13: Downregulated Gene Set Enrichment Analysis for significant genes between the control and iAs with nominal p-value < 0.05.

| GS                                                       | Size | ES    | NES   | NOM<br>p-val | FDR q-<br>val | FWER<br>p-val | Rank at<br>Max | Leading Edge                        |
|----------------------------------------------------------|------|-------|-------|--------------|---------------|---------------|----------------|-------------------------------------|
| TGANTCA_API_C                                            | 6    | -0.72 | -1.96 | 0.009        | 0.005         | 0.005         | 13             | tags=83%, list=30%,<br>signal=102%  |
| RODRIGUES_THYROID_CARCINOMA_P<br>OORLY_DIFFERENTIATED_DN | 5    | -0.67 | -1.7  | 0.019        | 0.047         | 0.017         | 19             | tags=100%, list=43%,<br>signal=156% |

Supplementary Table 14: Ingenuity Pathway Analysis of Supplementary Table 10.

| © 2000-2022 QIAGEN. All rights reserved.                                  |               |        |         |                                                                                                  |
|---------------------------------------------------------------------------|---------------|--------|---------|--------------------------------------------------------------------------------------------------|
| Ingenuity Canonical Pathways                                              | -log(p-value) | Ratio  | z-score | Molecules                                                                                        |
| Superpathway of Cholesterol Biosynthesis                                  | 16.7          | 0.379  | #NUM!   | ACAT2,CYP51A1,DHCR24,DHCR7,EBP,FDFT1,HMGCR,HMGCS1,IDI1,MSMO1,SQLE                                |
| Cholesterol Biosynthesis I                                                | 12.1          | 0.538  | #NUM!   | CYP51A1,DHCR24,DHCR7,EBP,FDFT1,MSMO1,SQLE                                                        |
| Cholesterol Biosynthesis II (via 24,25-dihydrolanosterol)                 | 12.1          | 0.538  | #NUM!   | CYP51A1,DHCR24,DHCR7,EBP,FDFT1,MSMO1,SQLE                                                        |
| Cholesterol Biosynthesis III (via Desmosterol)                            | 12.1          | 0.538  | #NUM!   | CYP51A1,DHCR24,DHCR7,EBP,FDFT1,MSMO1,SQLE                                                        |
| Mevalonate Pathway I                                                      | 5.78          | 0.286  | #NUM!   | ACAT2,HMGCR,HMGCS1,IDI1                                                                          |
| Superpathway of Geranylgeranyldiphosphate Biosynthesis I (via Mevalonate) | 5.3           | 0.222  | #NUM!   | ACAT2,HMGCR,HMGCS1,IDI1                                                                          |
| Tight Junction Signaling                                                  | 4.62          | 0.0447 | #NUM!   | CLDN1,CLDN10,CLDN16,MYH10,MYLK,RAC1,STX16,VCL                                                    |
| Epoxysqualene Biosynthesis                                                | 4.37          | 1      | #NUM!   | FDFT1,SQLE                                                                                       |
| Ferroptosis Signaling Pathway                                             | 3.63          | 0.0455 | #NUM!   | ARF4,CBS/LOC102724560,EMP1,FDFT1,HMGCR,SAT1                                                      |
| Coronavirus Pathogenesis Pathway                                          | 3.4           | 0.0343 | #NUM!   | RN7SL1,RN7SL2,RNU2-1,RPS20,RPS24,STAT1,STING1                                                    |
| Integrin Signaling                                                        | 3.3           | 0.033  | #NUM!   | ACTN1,ARF4,MYLK,RAC1,RHOB,TSPAN1,VCL                                                             |
| Zymosterol Biosynthesis                                                   | 3.2           | 0.333  | #NUM!   | CYP51A1,MSMO1                                                                                    |
| Systemic Lupus Erythematosus Signaling                                    | 3.04          | 0.019  | #NUM!   | HNRNPA2B1,RNU1-2,RNU1-27P,RNU1-28P,RNU1-3,RNU1-4,RNU2-1,RNU5E-1,RNU6-1,RNU6-15P,RNVU1-18,RNVU1-7 |
| Leukocyte Extravasation Signaling                                         | 2.76          | 0.0311 | #NUM!   | ACTN1,CLDN1,CLDN10,CLDN16,RAC1,VCL                                                               |
| Ketogenesis                                                               | 2.65          | 0.182  | #NUM!   | ACAT2,HMGCS1                                                                                     |
| Sertoli Cell-Sertoli Cell Junction Signaling                              | 2.62          | 0.0291 | #NUM!   | ACTN1,CLDN1,CLDN10,CLDN16,RAC1,VCL                                                               |
| Oleate Biosynthesis II (Animals)                                          | 2.5           | 0.154  | #NUM!   | FADS2,SCD5                                                                                       |
| Acetyl-CoA Biosynthesis III (from Citrate)                                | 2.18          | 1      | #NUM!   | ACLY                                                                                             |
| MicroRNA Biogenesis Signaling Pathway                                     | 2.11          | 0.0267 | #NUM!   | DDX17,DDX5,FUS,HNRNPA2B1,SRSF1                                                                   |
| LXR/RXR Activation                                                        | 2.06          | 0.0325 | #NUM!   | CYP51A1,FDFT1,HMGCR,LDLR                                                                         |
| ILK Signaling                                                             | 1.98          | 0.0249 | #NUM!   | ACTN1,MYH10,RAC1,RHOB,VCL                                                                        |
| Glioma Invasiveness Signaling                                             | 1.91          | 0.0411 | #NUM!   | PLAU,RAC1,RHOB                                                                                   |
| Agranulocyte Adhesion and Diapedesis                                      | 1.9           | 0.0238 | #NUM!   | CLDN1,CLDN10,CLDN16,CXCL14,MYH10                                                                 |
| Cysteine Biosynthesis/Homocysteine Degradation                            | 1.89          | 0.5    | #NUM!   | CBS/LOC102724560                                                                                 |
| Putrescine Biosynthesis III                                               | 1.89          | 0.5    | #NUM!   | ODC1                                                                                             |
| Glutamine Degradation I                                                   | 1.89          | 0.5    | #NUM!   | GLS                                                                                              |
| Regulation of Cellular Mechanics by Calpain Protease                      | 1.68          | 0.0337 | #NUM!   | ACTN1,CAST,VCL                                                                                   |
| Actin Cytoskeleton Signaling                                              | 1.65          | 0.0205 | #NUM!   | ACTN1,MYH10,MYLK,RAC1,VCL                                                                        |
| Complement System                                                         | 1.61          | 0.0541 | #NUM!   | CD55,CFI                                                                                         |
| Germ Cell-Sertoli Cell Junction Signaling                                 | 1.59          | 0.0235 | #NUM!   | ACTN1,RAC1,RHOB,VCL                                                                              |
| Spermine and Spermidine Degradation I                                     | 1.59          | 0.25   | #NUM!   | SAT1                                                                                             |
| Tumor Microenvironment Pathway                                            | 1.52          | 0.0223 | #NUM!   | CFLAR,PLAU,RAC1,SPP1                                                                             |
| Retinoate Biosynthesis I                                                  | 1.51          | 0.0476 | #NUM!   | AKR1B1,RDH10                                                                                     |
| Oncostatin M Signaling                                                    | 1.49          | 0.0465 | #NUM!   | PLAU,STAT1                                                                                       |
| Trans, trans-farnesyl Diphosphate Biosynthesis                            | 1.49          | 0.2    | #NUM!   | IDI1                                                                                             |
| Paxillin Signaling                                                        | 1.48          | 0.028  | #NUM!   | ACTN1,RAC1,VCL                                                                                   |
| Granulocyte Adhesion and Diapedesis                                       | 1.45          | 0.0212 | #NUM!   | CLDN1,CLDN10,CLDN16,CXCL14                                                                       |
| Glucocorticoid Receptor Signaling                                         | 1.42          | 0.0137 | #NUM!   | FKBP5,GJA1,HLA-DMB,KRT19,MT-ND1,PLAU,RAC1,STAT1                                                  |
| Glycine Cleavage Complex                                                  | 1.41          | 0.167  | #NUM!   | GLDC                                                                                             |
| Regulation of Actin-based Motility by Rho                                 | 1.4           | 0.0261 | #NUM!   | MYLK,RAC1,RHOB                                                                                   |
| Sirtuin Signaling Pathway                                                 | 1.36          | 0.0171 | #NUM!   | ACLY,GLS,MT-ND1,PDHA1,SCNN1A                                                                     |
| Ceramide Biosynthesis                                                     | 1.35          | 0.143  | #NUM!   | SPTLC3                                                                                           |
| Acetyl-CoA Biosynthesis I (Pyruvate Dehydrogenase Complex)                | 1.35          | 0.143  | #NUM!   | PDHA1                                                                                            |
| CSDE1 Signaling Pathway                                                   | 1.28          | 0.0357 | #NUM!   | FUS,RAC1                                                                                         |
| mTOR Signaling                                                            | 1.28          | 0.0187 | #NUM!   | RAC1,RHOB,RPS20,RPS24                                                                            |

|                                                                       |       |        |       |                                   |
|-----------------------------------------------------------------------|-------|--------|-------|-----------------------------------|
| Polyamine Regulation in Colon Cancer                                  | 1.26  | 0.0345 | #NUM! | ODC1,SAT1                         |
| Synaptogenesis Signaling Pathway                                      | 1.25  | 0.0159 | #NUM! | CDH3,FARP1,RAC1,STX16,THBS1       |
| RHOGDI Signaling                                                      | 1.25  | 0.0182 | #NUM! | CDH3,MYH10,RAC1,RHOB              |
| Citrulline Biosynthesis                                               | 1.24  | 0.111  | #NUM! | GLS                               |
| Neuroinflammation Signaling Pathway                                   | 1.24  | 0.0158 | #NUM! | CFLAR,GLS,HLA-DMB,RAC1,STAT1      |
| Semaphorin Signaling in Neurons                                       | 1.22  | 0.0328 | #NUM! | RAC1,RHOB                         |
| Thrombin Signaling                                                    | 1.22  | 0.0178 | #NUM! | ARHGEF38,MYLK,RAC1,RHOB           |
| EIF2 Signaling                                                        | 1.21  | 0.0176 | #NUM! | RPL41,RPL7,RPS20,RPS24            |
| Ketolysis                                                             | 1.2   | 0.1    | #NUM! | ACAT2                             |
| Remodeling of Epithelial Adherens Junctions                           | 1.14  | 0.0294 | #NUM! | ACTN1,VCL                         |
| Semaphorin Neuronal Repulsive Signaling Pathway                       | 1.12  | 0.02   | #NUM! | FARP1,RAC1,SEMA6A                 |
| Mineralocorticoid Biosynthesis                                        | 1.09  | 0.0769 | #NUM! | EBP                               |
| Epithelial Adherens Junction Signaling                                | 1.08  | 0.0191 | #NUM! | MYH10,RAC1,VCL                    |
| Glucocorticoid Biosynthesis                                           | 1.06  | 0.0714 | #NUM! | EBP                               |
| Telomere Extension by Telomerase                                      | 1.03  | 0.0667 | #NUM! | HNRNPA2B1                         |
| Superpathway of Citrulline Metabolism                                 | 1.03  | 0.0667 | #NUM! | GLS                               |
| IL-3 Signaling                                                        | 1.02  | 0.0253 | #NUM! | RAC1,STAT1                        |
| Pathogen Induced Cytokine Storm Signaling Pathway                     | 1.01  | 0.0134 | #NUM! | CXCL14,HLA-DMB,HMGCR,STAT1,STING1 |
| Signaling by Rho Family GTPases                                       | 1.01  | 0.015  | #NUM! | CDH3,MYLK,RAC1,RHOB               |
| Parkinson's Signaling                                                 | 1     | 0.0625 | #NUM! | UCHL1                             |
| Insulin Secretion Signaling Pathway                                   | 0.983 | 0.0147 | #NUM! | PDHA1,SCNN1A,STAT1,STX16          |
| PEDF Signaling                                                        | 0.979 | 0.0238 | #NUM! | CFLAR,RAC1                        |
| Isoleucine Degradation I                                              | 0.955 | 0.0556 | #NUM! | ACAT2                             |
| Immunogenic Cell Death Signaling Pathway                              | 0.932 | 0.0222 | #NUM! | CFLAR,STING1                      |
| Glutaryl-CoA Degradation                                              | 0.932 | 0.0526 | #NUM! | ACAT2                             |
| $\gamma$ -linolenate Biosynthesis II (Animals)                        | 0.932 | 0.0526 | #NUM! | FADS2                             |
| Actin Nucleation by ARP-WASP Complex                                  | 0.907 | 0.0215 | #NUM! | RAC1,RHOB                         |
| Macrophage Classical Activation Signaling Pathway                     | 0.896 | 0.0159 | #NUM! | HLA-DMB,PDHA1,STAT1               |
| Androgen Biosynthesis                                                 | 0.889 | 0.0476 | #NUM! | EBP                               |
| Production of Nitric Oxide and Reactive Oxygen Species in Macrophages | 0.886 | 0.0157 | #NUM! | RAC1,RHOB,STAT1                   |
| Putrescine Degradation III                                            | 0.873 | 0.0455 | #NUM! | SAT1                              |
| VEGF Signaling                                                        | 0.863 | 0.0202 | #NUM! | ACTN1,VCL                         |
| The Visual Cycle                                                      | 0.854 | 0.0435 | #NUM! | RDH10                             |
| IL-22 Signaling                                                       | 0.836 | 0.0417 | #NUM! | STAT1                             |
| Sumoylation Pathway                                                   | 0.836 | 0.0194 | #NUM! | RAC1,RHOB                         |
| Virus Entry via Endocytic Pathways                                    | 0.83  | 0.0192 | #NUM! | CD55,RAC1                         |
| RAR Activation                                                        | 0.824 | 0.0147 | #NUM! | AKR1B1,RAC1,RDH10                 |
| Role of JAK family kinases in IL-6-type Cytokine Signaling            | 0.821 | 0.04   | #NUM! | STAT1                             |
| Bupropion Degradation                                                 | 0.821 | 0.04   | #NUM! | CYP51A1                           |
| Role of JAK1, JAK2 and TYK2 in Interferon Signaling                   | 0.804 | 0.0385 | #NUM! | STAT1                             |
| Tryptophan Degradation III (Eukaryotic)                               | 0.804 | 0.0385 | #NUM! | ACAT2                             |
| Cysteine Biosynthesis III (mammalia)                                  | 0.79  | 0.037  | #NUM! | CBS/LOC102724560                  |
| Multiple Sclerosis Signaling Pathway                                  | 0.75  | 0.0135 | #NUM! | HLA-DMB,PLAU,STAT1                |
| PAK Signaling                                                         | 0.75  | 0.0171 | #NUM! | MYLK,RAC1                         |
| Role of p14/p19ARF in Tumor Suppression                               | 0.747 | 0.0333 | #NUM! | RAC1                              |
| Cholecystokinin/Gastrin-mediated Signaling                            | 0.738 | 0.0168 | #NUM! | RAC1,RHOB                         |
| MSP-RON Signaling In Macrophages Pathway                              | 0.738 | 0.0168 | #NUM! | HLA-DMB,STAT1                     |
| Sphingosine-1-phosphate Signaling                                     | 0.733 | 0.0167 | #NUM! | RAC1,RHOB                         |
| Renin-Angiotensin Signaling                                           | 0.726 | 0.0165 | #NUM! | RAC1,STAT1                        |
| Methylglyoxal Degradation III                                         | 0.724 | 0.0312 | #NUM! | AKR1B1                            |

|                                                                |       |         |       |                                |
|----------------------------------------------------------------|-------|---------|-------|--------------------------------|
| Th1 Pathway                                                    | 0.721 | 0.0164  | #NUM! | HLA-DMB,STAT1                  |
| Pancreatic Adenocarcinoma Signaling                            | 0.701 | 0.0159  | #NUM! | RAC1,STAT1                     |
| Inhibition of Angiogenesis by TSP1                             | 0.699 | 0.0294  | #NUM! | THBS1                          |
| Role of JAK2 in Hormone-like Cytokine Signaling                | 0.699 | 0.0294  | #NUM! | STAT1                          |
| Osteoarthritis Pathway                                         | 0.697 | 0.0127  | #NUM! | PTH1R,RAC1,SPP1                |
| GP6 Signaling Pathway                                          | 0.695 | 0.0157  | #NUM! | LAMC2,RAC1                     |
| Coagulation System                                             | 0.688 | 0.0286  | #NUM! | PLAU                           |
| IL-9 Signaling                                                 | 0.688 | 0.0286  | #NUM! | STAT1                          |
| Interferon Signaling                                           | 0.676 | 0.0278  | #NUM! | STAT1                          |
| CCR3 Signaling in Eosinophils                                  | 0.66  | 0.0149  | #NUM! | MYLK,RAC1                      |
| Adipogenesis pathway                                           | 0.656 | 0.0148  | #NUM! | KLF5,TXNIP                     |
| SNARE Signaling Pathway                                        | 0.652 | 0.0147  | #NUM! | MYH10,STX16                    |
| Antigen Presentation Pathway                                   | 0.646 | 0.0256  | #NUM! | HLA-DMB                        |
| Wound Healing Signaling Pathway                                | 0.642 | 0.0119  | #NUM! | LAMC2,RAC1,STAT1               |
| Reelin Signaling in Neurons                                    | 0.642 | 0.0145  | #NUM! | ARHGEF38,RAC1                  |
| Superpathway of Methionine Degradation                         | 0.636 | 0.025   | #NUM! | CBS/LOC102724560               |
| Insulin Receptor Signaling                                     | 0.633 | 0.0143  | #NUM! | ACLY,SCNN1A                    |
| Role Of Chondrocytes In Rheumatoid Arthritis Signaling Pathway | 0.629 | 0.0142  | #NUM! | CFLAR,PLAU                     |
| Axonal Guidance Signaling                                      | 0.618 | 0.00982 | #NUM! | ADAMTS1,LNPEP,NTN4,RAC1,SEMA6A |
| PI3K Signaling in B Lymphocytes                                | 0.611 | 0.0138  | #NUM! | MALT1,RAC1                     |
| Acetone Degradation I (to Methylglyoxal)                       | 0.609 | 0.0233  | #NUM! | CYP51A1                        |
| Estrogen Biosynthesis                                          | 0.592 | 0.0222  | #NUM! | CYP51A1                        |
| Dilated Cardiomyopathy Signaling Pathway                       | 0.59  | 0.0133  | #NUM! | MYH10,TPM1                     |
| Cellular Effects of Sildenafil (Viagra)                        | 0.59  | 0.0133  | #NUM! | MYH10,MYLK                     |
| Role of OCT4 in Mammalian Embryonic Stem Cell Pluripotency     | 0.583 | 0.0217  | #NUM! | SPP1                           |
| Colorectal Cancer Metastasis Signaling                         | 0.583 | 0.0111  | #NUM! | RAC1,RHOB,STAT1                |
| B Cell Development                                             | 0.583 | 0.0217  | #NUM! | HLA-DMB                        |
| iNOS Signaling                                                 | 0.575 | 0.0213  | #NUM! | STAT1                          |
| Ephrin A Signaling                                             | 0.575 | 0.0213  | #NUM! | RAC1                           |
| Retinol Biosynthesis                                           | 0.575 | 0.0213  | #NUM! | RDH10                          |
| Necroptosis Signaling Pathway                                  | 0.565 | 0.0128  | #NUM! | CFLAR,STAT1                    |
| Phagosome Maturation                                           | 0.558 | 0.0127  | #NUM! | RAC1,STX16                     |
| MYC Mediated Apoptosis Signaling                               | 0.553 | 0.02    | #NUM! | CFLAR                          |
| Oxytocin Signaling Pathway                                     | 0.551 | 0.0106  | #NUM! | GJA1,MYH10,MYLK                |
| HMGB1 Signaling                                                | 0.526 | 0.012   | #NUM! | RAC1,RHOB                      |
| Hepatic Fibrosis Signaling Pathway                             | 0.523 | 0.00946 | #NUM! | MYLK,RAC1,RHOB,SPP1            |
| CXCR4 Signaling                                                | 0.521 | 0.0119  | #NUM! | RAC1,RHOB                      |
| EGF Signaling                                                  | 0.519 | 0.0182  | #NUM! | STAT1                          |
| Ribonucleotide Reductase Signaling Pathway                     | 0.514 | 0.0118  | #NUM! | CDH3,THBS1                     |
| Gaq Signaling                                                  | 0.514 | 0.0118  | #NUM! | RAC1,RHOB                      |
| Mitochondrial Dysfunction                                      | 0.511 | 0.0117  | #NUM! | MT-ND1,PDHA1                   |
| Glioblastoma Multiforme Signaling                              | 0.511 | 0.0117  | #NUM! | RAC1,RHOB                      |
| Th1 and Th2 Activation Pathway                                 | 0.509 | 0.0116  | #NUM! | HLA-DMB,STAT1                  |
| Senescence Pathway                                             | 0.507 | 0.01    | #NUM! | DHCR24,PDHA1,STING1            |
| CNTF Signaling                                                 | 0.506 | 0.0175  | #NUM! | STAT1                          |
| WNT/ $\beta$ -catenin Signaling                                | 0.502 | 0.0115  | #NUM! | CDH3,GJA1                      |
| Nicotine Degradation III                                       | 0.499 | 0.0172  | #NUM! | CYP51A1                        |
| Retinoic acid Mediated Apoptosis Signaling                     | 0.487 | 0.0167  | #NUM! | CFLAR                          |
| PCP (Planar Cell Polarity) Pathway                             | 0.487 | 0.0167  | #NUM! | RAC1                           |
| Role Of Osteoclasts In Rheumatoid Arthritis Signaling Pathway  | 0.485 | 0.00974 | #NUM! | RAC1,RHOB,SPP1                 |



|                                                                              |       |         |       |                             |
|------------------------------------------------------------------------------|-------|---------|-------|-----------------------------|
| Regulation of eIF4 and p70S6K Signaling                                      | 0.479 | 0.011   | #NUM! | RPS20,RPS24                 |
| Melatonin Degradation I                                                      | 0.475 | 0.0161  | #NUM! | CYP51A1                     |
| Thrombopoietin Signaling                                                     | 0.47  | 0.0159  | #NUM! | STAT1                       |
| Activation of IRF by Cytosolic Pattern Recognition Receptors                 | 0.458 | 0.0154  | #NUM! | STAT1                       |
| Nicotine Degradation II                                                      | 0.453 | 0.0152  | #NUM! | CYP51A1                     |
| Glutamate Receptor Signaling                                                 | 0.453 | 0.0152  | #NUM! | GLS                         |
| Superpathway of Melatonin Degradation                                        | 0.449 | 0.0149  | #NUM! | CYP51A1                     |
| Stearate Biosynthesis I (Animals)                                            | 0.449 | 0.0149  | #NUM! | DHCR24                      |
| Pulmonary Fibrosis Idiopathic Signaling Pathway                              | 0.445 | 0.0092  | #NUM! | ADAMTS1,PLAU,THBS1          |
| Clathrin-mediated Endocytosis Signaling                                      | 0.444 | 0.0104  | #NUM! | LDLR,RAC1                   |
| Hepatic Fibrosis / Hepatic Stellate Cell Activation                          | 0.44  | 0.0103  | #NUM! | MYH10,STAT1                 |
| Agrin Interactions at Neuromuscular Junction                                 | 0.438 | 0.0145  | #NUM! | RAC1                        |
| Role of JAK1 and JAK3 in $\gamma$ c Cytokine Signaling                       | 0.438 | 0.0145  | #NUM! | STAT1                       |
| GM-CSF Signaling                                                             | 0.433 | 0.0143  | #NUM! | STAT1                       |
| Natural Killer Cell Signaling                                                | 0.429 | 0.0101  | #NUM! | PVR,RAC1                    |
| Growth Hormone Signaling                                                     | 0.428 | 0.0141  | #NUM! | STAT1                       |
| Pulmonary Healing Signaling Pathway                                          | 0.427 | 0.0101  | #NUM! | RAC1,THBS1                  |
| Ephrin B Signaling                                                           | 0.424 | 0.0139  | #NUM! | RAC1                        |
| Netrin Signaling                                                             | 0.424 | 0.0139  | #NUM! | RAC1                        |
| CDX Gastrointestinal Cancer Signaling Pathway                                | 0.419 | 0.0099  | #NUM! | KLF5,RAC1                   |
| Caveolar-mediated Endocytosis Signaling                                      | 0.41  | 0.0133  | #NUM! | CD55                        |
| Granzyme A Signaling                                                         | 0.41  | 0.0133  | #NUM! | MT-ND1                      |
| GDNF Family Ligand-Receptor Interactions                                     | 0.406 | 0.0132  | #NUM! | RAC1                        |
| Macropinocytosis Signaling                                                   | 0.406 | 0.0132  | #NUM! | RAC1                        |
| HIF1 $\alpha$ Signaling                                                      | 0.403 | 0.00962 | #NUM! | RAC1,SAT1                   |
| IL-8 Signaling                                                               | 0.398 | 0.00952 | #NUM! | RAC1,RHOB                   |
| VDR/RXR Activation                                                           | 0.397 | 0.0128  | #NUM! | SPP1                        |
| IL-7 Signaling Pathway                                                       | 0.397 | 0.0128  | #NUM! | STAT1                       |
| Renal Cell Carcinoma Signaling                                               | 0.393 | 0.0127  | #NUM! | RAC1                        |
| Role of BRCA1 in DNA Damage Response                                         | 0.388 | 0.0125  | #NUM! | STAT1                       |
| ERK/MAPK Signaling                                                           | 0.386 | 0.0093  | #NUM! | RAC1,STAT1                  |
| FLT3 Signaling in Hematopoietic Progenitor Cells                             | 0.38  | 0.0122  | #NUM! | STAT1                       |
| JAK/STAT Signaling                                                           | 0.38  | 0.0122  | #NUM! | STAT1                       |
| BEX2 Signaling Pathway                                                       | 0.38  | 0.0122  | #NUM! | SPP1                        |
| Calcium Signaling                                                            | 0.377 | 0.00913 | #NUM! | MYH10,TPM1                  |
| TR/RXR Activation                                                            | 0.373 | 0.0119  | #NUM! | LDLR                        |
| LPS-stimulated MAPK Signaling                                                | 0.369 | 0.0118  | #NUM! | RAC1                        |
| Role of Hypercytokinemia/hyperchemokineemia in the Pathogenesis of Influenza | 0.365 | 0.0116  | #NUM! | STAT1                       |
| FGF Signaling                                                                | 0.365 | 0.0116  | #NUM! | RAC1                        |
| PDGF Signaling                                                               | 0.365 | 0.0116  | #NUM! | STAT1                       |
| Prolactin Signaling                                                          | 0.347 | 0.011   | #NUM! | STAT1                       |
| Crosstalk between Dendritic Cells and Natural Killer Cells                   | 0.347 | 0.011   | #NUM! | FSCN1                       |
| Apelin Adipocyte Signaling Pathway                                           | 0.347 | 0.011   | #NUM! | RAC1                        |
| Pyroptosis Signaling Pathway                                                 | 0.34  | 0.0108  | #NUM! | TXNIP                       |
| IL-4 Signaling                                                               | 0.34  | 0.0108  | #NUM! | HLA-DMB                     |
| Fc $\gamma$ Receptor-mediated Phagocytosis in Macrophages and Monocytes      | 0.336 | 0.0106  | #NUM! | RAC1                        |
| Death Receptor Signaling                                                     | 0.33  | 0.0104  | #NUM! | CFLAR                       |
| p53 Signaling                                                                | 0.323 | 0.0102  | #NUM! | THBS1                       |
| UVA-Induced MAPK Signaling                                                   | 0.323 | 0.0102  | #NUM! | STAT1                       |
| Phagosome Formation                                                          | 0.322 | 0.00722 | #NUM! | MALT1,MYH10,MYLK,PTH1R,RAC1 |

|                                                               |       |         |       |                     |
|---------------------------------------------------------------|-------|---------|-------|---------------------|
| Apelin Cardiomyocyte Signaling Pathway                        | 0.321 | 0.0101  | #NUM! | MYLK                |
| IGF-1 Signaling                                               | 0.305 | 0.00962 | #NUM! | IGFBP7              |
| PD-1, PD-L1 cancer immunotherapy pathway                      | 0.299 | 0.00943 | #NUM! | HLA-DMB             |
| Cardiac Hypertrophy Signaling                                 | 0.292 | 0.00766 | #NUM! | RAC1,RHOB           |
| Oxidative Phosphorylation                                     | 0.286 | 0.00901 | #NUM! | MT-ND1              |
| CDK5 Signaling                                                | 0.275 | 0.0087  | #NUM! | LAMC2               |
| IL-13 Signaling Pathway                                       | 0.272 | 0.00862 | #NUM! | STAT1               |
| Amyotrophic Lateral Sclerosis Signaling                       | 0.272 | 0.00862 | #NUM! | RAC1                |
| Bladder Cancer Signaling                                      | 0.272 | 0.00862 | #NUM! | THBS1               |
| Role of Tissue Factor in Cancer                               | 0.272 | 0.00862 | #NUM! | RAC1                |
| Fc Epsilon RI Signaling                                       | 0.268 | 0.00847 | #NUM! | RAC1                |
| NGF Signaling                                                 | 0.263 | 0.00833 | #NUM! | RAC1                |
| p38 MAPK Signaling                                            | 0.263 | 0.00833 | #NUM! | STAT1               |
| Huntington's Disease Signaling                                | 0.256 | 0.00707 | #NUM! | GLS,STX16           |
| IL-15 Production                                              | 0.256 | 0.00813 | #NUM! | STAT1               |
| RHOA Signaling                                                | 0.253 | 0.00806 | #NUM! | MYLK                |
| Molecular Mechanisms of Cancer                                | 0.251 | 0.00673 | #NUM! | CFLAR,RAC1,RHOB     |
| Gas Signaling                                                 | 0.251 | 0.008   | #NUM! | PTH1R               |
| Endocannabinoid Developing Neuron Pathway                     | 0.247 | 0.00787 | #NUM! | RAC1                |
| fMLP Signaling in Neutrophils                                 | 0.238 | 0.00763 | #NUM! | RAC1                |
| HGF Signaling                                                 | 0.237 | 0.00758 | #NUM! | RAC1                |
| Gα12/13 Signaling                                             | 0.234 | 0.00752 | #NUM! | CDH3                |
| STAT3 Pathway                                                 | 0.23  | 0.00741 | #NUM! | RAC1                |
| IL-12 Signaling and Production in Macrophages                 | 0.228 | 0.00735 | #NUM! | STAT1               |
| Role of PKR in Interferon Induction and Antiviral Response    | 0.228 | 0.00735 | #NUM! | STAT1               |
| RAC Signaling                                                 | 0.226 | 0.0073  | #NUM! | RAC1                |
| Th2 Pathway                                                   | 0.226 | 0.0073  | #NUM! | HLA-DMB             |
| PTEN Signaling                                                | 0.203 | 0.00667 | #NUM! | RAC1                |
| NAD Signaling Pathway                                         | 0.201 | 0.00662 | #NUM! | GJA1                |
| Neurovascular Coupling Signaling Pathway                      | 0     | 0.00442 | #NUM! | GJA1                |
| Role Of Osteoblasts In Rheumatoid Arthritis Signaling Pathway | 0     | 0.00417 | #NUM! | STAT1               |
| NRF2-mediated Oxidative Stress Response                       | 0     | 0.00422 | #NUM! | FKBP5               |
| LPS/IL-1 Mediated Inhibition of RXR Function                  | 0     | 0.00394 | #NUM! | HMGCS1              |
| Erythropoietin Signaling Pathway                              | 0     | 0.00565 | #NUM! | RAC1                |
| Role of NFAT in Regulation of the Immune Response             | 0     | 0.00169 | #NUM! | HLA-DMB             |
| Calcium-induced T Lymphocyte Apoptosis                        | 0     | 0.00217 | #NUM! | HLA-DMB             |
| IL-17 Signaling                                               | 0     | 0.00535 | #NUM! | SRSF1               |
| CTLA4 Signaling in Cytotoxic T Lymphocytes                    | 0     | 0.00493 | #NUM! | HLA-DMB,MALT1,RAC1  |
| T Helper Cell Differentiation                                 | 0     | 0.00425 | #NUM! | HLA-DMB,STAT1       |
| CD28 Signaling in T Helper Cells                              | 0     | 0.0058  | #NUM! | HLA-DMB,MALT1,RAC1  |
| Dendritic Cell Maturation                                     | 0     | 0.00503 | #NUM! | FSCN1,HLA-DMB,STAT1 |
| ICOS-ICOSL Signaling in T Helper Cells                        | 0     | 0.00394 | #NUM! | HLA-DMB,RAC1        |
| GNRH Signaling                                                | 0     | 0.00524 | #NUM! | RAC1                |
| Aldosterone Signaling in Epithelial Cells                     | 0     | 0.00595 | #NUM! | SCNN1A              |
| CREB Signaling in Neurons                                     | 0     | 0.00165 | #NUM! | PTH1R               |
| Type I Diabetes Mellitus Signaling                            | 0     | 0.00393 | #NUM! | HLA-DMB,STAT1       |
| Allograft Rejection Signaling                                 | 0     | 0.00205 | #NUM! | HLA-DMB             |
| Autoimmune Thyroid Disease Signaling                          | 0     | 0.00218 | #NUM! | HLA-DMB             |
| Graft-versus-Host Disease Signaling                           | 0     | 0.00224 | #NUM! | HLA-DMB             |
| CDC42 Signaling                                               | 0     | 0.00347 | #NUM! | HLA-DMB,MYLK        |

|                                                                                |   |         |       |                         |
|--------------------------------------------------------------------------------|---|---------|-------|-------------------------|
| FAK Signaling                                                                  | 0 | 0.00192 | #NUM! | PTH1R,RAC1              |
| AMPK Signaling                                                                 | 0 | 0.00413 | #NUM! | HMGCR                   |
| Role of Osteoblasts, Osteoclasts and Chondrocytes in Rheumatoid Arthritis      | 0 | 0.00446 | #NUM! | SPP1                    |
| Phospholipase C Signaling                                                      | 0 | 0.00293 | #NUM! | RAC1,RHOB               |
| Ovarian Cancer Signaling                                                       | 0 | 0.00633 | #NUM! | GJA1                    |
| HER-2 Signaling in Breast Cancer                                               | 0 | 0.00441 | #NUM! | ARF4                    |
| Altered T Cell and B Cell Signaling in Rheumatoid Arthritis                    | 0 | 0.00405 | #NUM! | HLA-DMB,SPP1            |
| Protein Kinase A Signaling                                                     | 0 | 0.00488 | #NUM! | MYH10,MYLK              |
| Role of Macrophages, Fibroblasts and Endothelial Cells in Rheumatoid Arthritis | 0 | 0.00301 | #NUM! | RAC1                    |
| Breast Cancer Regulation by Stathmin1                                          | 0 | 0.00337 | #NUM! | PTH1R,RAC1              |
| Regulation of IL-2 Expression in Activated and Anergic T Lymphocytes           | 0 | 0.00433 | #NUM! | MALT1,RAC1              |
| NUR77 Signaling in T Lymphocytes                                               | 0 | 0.00195 | #NUM! | HLA-DMB                 |
| PKCθ Signaling in T Lymphocytes                                                | 0 | 0.00538 | #NUM! | HLA-DMB,MALT1,RAC1      |
| OX40 Signaling Pathway                                                         | 0 | 0.00209 | #NUM! | HLA-DMB                 |
| Gap Junction Signaling                                                         | 0 | 0.00505 | #NUM! | GJA1                    |
| TEC Kinase Signaling                                                           | 0 | 0.00519 | #NUM! | RAC1,RHOB,STAT1         |
| Estrogen Receptor Signaling                                                    | 0 | 0.00489 | #NUM! | DDX5,MT-ND1             |
| SAPK/JNK Signaling                                                             | 0 | 0.00199 | #NUM! | RAC1                    |
| Protein Ubiquitination Pathway                                                 | 0 | 0.00365 | #NUM! | UCLH1                   |
| B Cell Receptor Signaling                                                      | 0 | 0.00315 | #NUM! | MALT1,RAC1              |
| cAMP-mediated signaling                                                        | 0 | 0.00426 | #NUM! | PTH1R                   |
| NF-κB Signaling                                                                | 0 | 0.00175 | #NUM! | MALT1                   |
| T Cell Receptor Signaling                                                      | 0 | 0.00487 | #NUM! | HLA-DMB,MALT1,RAC1      |
| G-Protein Coupled Receptor Signaling                                           | 0 | 0.00427 | #NUM! | MYLK,PTH1R,RAC1         |
| Gustation Pathway                                                              | 0 | 0.00493 | #NUM! | SCNN1A                  |
| Opioid Signaling Pathway                                                       | 0 | 0.00358 | #NUM! | RAC1                    |
| Adrenomedullin signaling pathway                                               | 0 | 0.00503 | #NUM! | MYLK                    |
| T Cell Exhaustion Signaling Pathway                                            | 0 | 0.00353 | #NUM! | HLA-DMB,STAT1           |
| Systemic Lupus Erythematosus In T Cell Signaling Pathway                       | 0 | 0.00466 | #NUM! | HLA-DMB,RAC1,RHOB       |
| Systemic Lupus Erythematosus In B Cell Signaling Pathway                       | 0 | 0.00552 | #NUM! | MALT1,RAC1,STAT1,STING1 |
| HOTAIR Regulatory Pathway                                                      | 0 | 0.00613 | #NUM! | SPP1                    |
| Regulation Of The Epithelial Mesenchymal Transition By Growth Factors Pathway  | 0 | 0.00521 | #NUM! | RAC1                    |
| Ephrin Receptor Signaling                                                      | 0 | 0.00495 | #NUM! | RAC1                    |

Supplementary Table 15: Differentially expressed genes between iAs exposed HRTPT cells (P3, P8, P10) and HRTPT cells following recovery from iAs exposure (P2, P11).

| probe                   | FC     | log2(FC) | Raw.pval | log(Pvalue) | Gene Symbol |
|-------------------------|--------|----------|----------|-------------|-------------|
| TC0200009068.hg.1       | 11.823 | 3.5635   | 5.78E-09 | 8.2378      |             |
| TC0200015624.hg.1       | 6.613  | 2.7253   | 6.31E-07 | 6.2         |             |
| TC0700006913.hg.1       | 6.425  | 2.6837   | 0.000752 | 3.1239      | GPNMB       |
| TC1000012050.hg.1       | 4.8468 | 2.277    | 8.43E-08 | 7.0743      | FGFR2       |
| TC100009025.hg.1        | 4.5237 | 2.1775   | 2.51E-07 | 6.6008      | EMX2        |
| TC0100015155.hg.1       | 4.0972 | 2.0346   | 1.31E-08 | 7.8838      | VAV3        |
| TC0400007799.hg.1       | 4.0266 | 2.0095   | 0.000164 | 3.7842      | SLC4A4      |
| TC0700010348.hg.1       | 4.007  | 2.0025   | 1.91E-06 | 5.7197      | SOSTDC1     |
| TC0500010043.hg.1       | 3.8689 | 1.9519   | 4.94E-07 | 6.3061      | SEMA5A      |
| TSUnmapped00000340.hg.1 | 3.4471 | 1.7854   | 1.23E-08 | 7.9107      |             |
| TSUnmapped00000845.hg.1 | 3.4471 | 1.7854   | 1.23E-08 | 7.9107      |             |
| TC0200009067.hg.1       | 3.3615 | 1.7491   | 0.00012  | 3.9223      | TMEM37      |
| TC0200015616.hg.1       | 3.2787 | 1.7131   | 5.94E-05 | 4.226       | ERBB4       |
| TC0200007418.hg.1       | 3.1093 | 1.6366   | 0.000173 | 3.7611      | SLC3A1      |
| TC1600008992.hg.1       | 2.9855 | 1.578    | 6.76E-05 | 4.17        |             |
| TC0400010242.hg.1       | 2.8841 | 1.5281   | 1.57E-05 | 4.804       | PPARGC1A    |
| TC0700008182.hg.1       | 2.8222 | 1.4968   | 0.005039 | 2.2976      |             |
| TC0200010634.hg.1       | 2.7475 | 1.4581   | 1.09E-07 | 6.9618      |             |
| TC1300006543.hg.1       | 2.6118 | 1.3851   | 3.41E-08 | 7.4675      | FGF9        |
| TC0300013282.hg.1       | 2.6038 | 1.3806   | 0.003741 | 2.4271      | RNA5SP149   |
| TC0400012621.hg.1       | 2.5497 | 1.3503   | 0.003615 | 2.4419      | ACSL1       |
| TC0200010630.hg.1       | 2.5444 | 1.3473   | 9.84E-05 | 4.0072      |             |
| TC1700010994.hg.1       | 2.4595 | 1.2983   | 0.000275 | 3.5603      |             |
| TC0100015586.hg.1       | 2.44   | 1.2869   | 1.73E-09 | 8.7614      | PDZK1       |
| TC0700006468.hg.1       | 2.4254 | 1.2782   | 0.003886 | 2.4105      |             |
| TC1600011364.hg.1       | 2.4108 | 1.2695   | 0.0012   | 2.9207      | NPIP5       |
| TC1500007695.hg.1       | 2.3539 | 1.235    | 0.039202 | 1.4067      | PAQR5       |
| TC0200009756.hg.1       | 2.3176 | 1.2126   | 5.58E-06 | 5.2536      | PKP4        |
| TC1600010375.hg.1       | 2.3028 | 1.2034   | 9.43E-09 | 8.0254      | CRNDE       |
| TC1600011514.hg.1       | 2.3015 | 1.2026   | 0.002922 | 2.5343      | SMG1P2      |
| TC1100008018.hg.1       | 2.2224 | 1.1521   | 0.015263 | 1.8163      | NEAT1       |
| TC0600011173.hg.1       | 2.1903 | 1.1311   | 0.000518 | 3.286       | GUSBP2      |
| TSUnmapped00000154.hg.1 | 2.1741 | 1.1204   | 1.38E-07 | 6.8588      |             |

|                         |         |         |          |        |            |
|-------------------------|---------|---------|----------|--------|------------|
| TC0400012829.hg.1       | 2.1567  | 1.1088  | 2.59E-06 | 5.5869 | ARHGEF38   |
| TC1600011501.hg.1       | 2.1411  | 1.0983  | 0.001158 | 2.9363 | NPIPB3     |
| TC1000010567.hg.1       | 2.1258  | 1.088   | 0.031064 | 1.5077 |            |
| TC1600009929.hg.1       | 2.0918  | 1.0647  | 0.002389 | 2.6218 |            |
| TC1600009958.hg.1       | 2.0587  | 1.0417  | 0.001079 | 2.9672 | LOC613037  |
| TC0500011352.hg.1       | 2.0515  | 1.0367  | 0.000926 | 3.0333 | EDIL3      |
| TC1600011505.hg.1       | 2.0302  | 1.0216  | 0.000697 | 3.1567 | NPIPB4     |
| TSUnmapped00000267.hg.1 | 2.0076  | 1.0055  | 7.71E-08 | 7.113  |            |
| TC1600008164.hg.1       | 0.49984 | -1.0005 | 5.81E-06 | 5.236  | FAM65A     |
| TC0600011960.hg.1       | 0.49897 | -1.003  | 1.96E-06 | 5.7069 | TNFRSF21   |
| TC1100007844.hg.1       | 0.49893 | -1.0031 | 0.000401 | 3.3965 | ASRGL1     |
| TC1700012073.hg.1       | 0.49758 | -1.007  | 0.000109 | 3.9614 | P4HB       |
| TC0400010418.hg.1       | 0.49759 | -1.007  | 0.000436 | 3.3606 | RELL1      |
| TC0100017116.hg.1       | 0.49717 | -1.0082 | 5.73E-05 | 4.2422 | C1orf116   |
| TC0800006869.hg.1       | 0.49649 | -1.0102 | 0.038739 | 1.4118 | SLC7A2     |
| TC1700009651.hg.1       | 0.49563 | -1.0127 | 0.000291 | 3.5364 | TP53       |
| TC0100016112.hg.1       | 0.49506 | -1.0143 | 0.000991 | 3.0038 | TAGLN2     |
| TC1000012428.hg.1       | 0.49347 | -1.019  | 2.71E-07 | 6.5663 | AKR1C3     |
| TC0X00010793.hg.1       | 0.49317 | -1.0198 | 2.43E-05 | 4.6142 | ZDHC9      |
| TC1100011367.hg.1       | 0.49317 | -1.0198 | 0.000301 | 3.5211 | UNC93B1    |
| TC1400008940.hg.1       | 0.4929  | -1.0206 | 0.00038  | 3.4204 | NFKBIA     |
| TC1800008474.hg.1       | 0.49214 | -1.0228 | 1.96E-07 | 6.707  | SLC39A6    |
| TC1000012139.hg.1       | 0.49177 | -1.0239 | 7.20E-05 | 4.1424 | CTBP2      |
| TC0100013229.hg.1       | 0.49161 | -1.0244 | 4.10E-07 | 6.3874 | HSPG2      |
| TC1800007431.hg.1       | 0.49138 | -1.0251 | 0.012426 | 1.9057 | MALT1      |
| TC1900007844.hg.1       | 0.49088 | -1.0266 | 0.000994 | 3.0028 | LSR        |
| TC0100018482.hg.1       | 0.49053 | -1.0276 | 0.000881 | 3.0551 | HIST2H2AA3 |
| TC0700009061.hg.1       | 0.4902  | -1.0286 | 1.19E-05 | 4.9248 | CALU       |
| TC2000008095.hg.1       | 0.48952 | -1.0306 | 1.17E-06 | 5.9317 | TPD52L2    |
| TC0600010057.hg.1       | 0.48923 | -1.0314 | 3.13E-07 | 6.5045 | ACAT2      |
| TC1100013040.hg.1       | 0.48914 | -1.0317 | 4.79E-05 | 4.3201 | TM7SF2     |
| TC2200007242.hg.1       | 0.48913 | -1.0317 | 0.000135 | 3.8692 | APOL1      |
| TC2200009257.hg.1       | 0.48866 | -1.0331 | 5.06E-05 | 4.2957 | TCN2       |
| TC0900009489.hg.1       | 0.48852 | -1.0335 | 2.32E-08 | 7.6342 | GLDC       |
| TC1200007686.hg.1       | 0.48736 | -1.037  | 1.93E-05 | 4.7155 | KRT18      |
| TC1400009147.hg.1       | 0.48609 | -1.0407 | 2.19E-05 | 4.6603 | PYGL       |
| TC2200008886.hg.1       | 0.48585 | -1.0414 | 3.45E-05 | 4.4619 | CY5R3      |

|                   |         |         |          |        |            |
|-------------------|---------|---------|----------|--------|------------|
| TC1600007449.hg.1 | 0.48523 | -1.0433 | 2.12E-05 | 4.673  | SLX1A      |
| TC0100015871.hg.1 | 0.48486 | -1.0444 | 1.71E-05 | 4.7671 | S100A16    |
| TC1400009529.hg.1 | 0.48263 | -1.051  | 0.000481 | 3.3177 | ACTN1      |
| TC0300013151.hg.1 | 0.48248 | -1.0515 | 1.19E-05 | 4.925  | NCEH1      |
| TC1700008867.hg.1 | 0.48045 | -1.0576 | 7.67E-08 | 7.1153 | SLC9A3R1   |
| TC1000010273.hg.1 | 0.47748 | -1.0665 | 3.65E-07 | 6.4379 | NRP1       |
| TC2100007485.hg.1 | 0.47686 | -1.0684 | 0.000101 | 3.9937 |            |
| TC0800010193.hg.1 | 0.47666 | -1.069  | 0.000343 | 3.4644 | TM2D2      |
| TC0300007067.hg.1 | 0.47652 | -1.0694 | 0.004089 | 2.3884 | MYD88      |
| TC0100010284.hg.1 | 0.47521 | -1.0734 | 4.49E-06 | 5.3482 | PEA15      |
| TC0100011736.hg.1 | 0.47495 | -1.0742 | 0.001822 | 2.7395 | DEGS1      |
| TC1100012992.hg.1 | 0.4746  | -1.0752 | 1.20E-06 | 5.9207 | HSD17B12   |
| TC1900010851.hg.1 | 0.47327 | -1.0793 | 0.000388 | 3.4107 | ETHE1      |
| TC1900009076.hg.1 | 0.47068 | -1.0872 | 0.004501 | 2.3467 | PLPP2      |
| TC0100015696.hg.1 | 0.47025 | -1.0885 | 0.001321 | 2.8792 | HIST2H2BF  |
| TC1800006897.hg.1 | 0.46998 | -1.0893 | 0.000168 | 3.7741 | LAMA3      |
| TC0100009876.hg.1 | 0.4684  | -1.0942 | 0.0009   | 3.0456 | HIST2H2AA3 |
| TC0100014193.hg.1 | 0.46737 | -1.0974 | 0.018817 | 1.7254 | TXNDC12    |
| TC0300013417.hg.1 | 0.4662  | -1.101  | 2.14E-08 | 7.6689 | LIPH       |
| TC1400007950.hg.1 | 0.46593 | -1.1018 | 0.000942 | 3.026  | CALM1      |
| TC2200008592.hg.1 | 0.46575 | -1.1024 | 0.000192 | 3.7166 | APOL2      |
| TC1700006585.hg.1 | 0.46509 | -1.1044 | 0.00135  | 2.8697 | CTNS       |
| TC2100007316.hg.1 | 0.46381 | -1.1084 | 9.64E-05 | 4.0159 |            |
| TC1200012859.hg.1 | 0.4635  | -1.1094 | 9.54E-07 | 6.0202 | RHOF       |
| TC0900009274.hg.1 | 0.46329 | -1.11   | 0.000127 | 3.8967 | TUBB4B     |
| TC0700012917.hg.1 | 0.46283 | -1.1115 | 0.001787 | 2.7478 | TPK1       |
| TC0600011185.hg.1 | 0.45824 | -1.1258 | 0.000225 | 3.6476 | HIST1H2BK  |
| TC1000008054.hg.1 | 0.45763 | -1.1278 | 0.000203 | 3.6917 | PLAU       |
| TC0900006522.hg.1 | 0.45658 | -1.1311 | 5.02E-07 | 6.299  | SLC1A1     |
| TC0800012176.hg.1 | 0.4565  | -1.1313 | 3.07E-06 | 5.5134 | PLEC       |
| TC0900010506.hg.1 | 0.45652 | -1.1313 | 1.53E-05 | 4.8164 | KRT18P24   |
| TC0500007114.hg.1 | 0.45413 | -1.1388 | 9.12E-06 | 5.0401 | RAI14      |
| TC1800007014.hg.1 | 0.4541  | -1.1389 | 3.78E-05 | 4.423  | DSG2       |
| TC0800007367.hg.1 | 0.45395 | -1.1394 | 0.000949 | 3.0229 | ADAM9      |
| TC0X00007190.hg.1 | 0.45381 | -1.1398 | 0.00642  | 2.1925 | PORCN      |
| TC1600010732.hg.1 | 0.45335 | -1.1413 | 0.000158 | 3.8    | NQO1       |
| TC1700011121.hg.1 | 0.45286 | -1.1429 | 1.14E-08 | 7.9423 | TOB1       |

|                   |         |         |          |        |           |
|-------------------|---------|---------|----------|--------|-----------|
| TC0100013205.hg.1 | 0.45218 | -1.145  | 4.55E-05 | 4.342  | ECE1      |
| TC0100015544.hg.1 | 0.44764 | -1.1596 | 0.002637 | 2.5789 | HIST2H2BB |
| TC1900007012.hg.1 | 0.44609 | -1.1646 | 0.000206 | 3.6865 | LDLR      |
| TC1100009514.hg.1 | 0.44454 | -1.1696 | 2.07E-05 | 4.6831 | TMEM45B   |
| TC0900011582.hg.1 | 0.44094 | -1.1813 | 7.99E-08 | 7.0972 | FAM129B   |
| TC1900011756.hg.1 | 0.43965 | -1.1856 | 1.33E-07 | 6.876  | PVR       |
| TC0100007486.hg.1 | 0.43909 | -1.1874 | 1.37E-08 | 7.8638 | SFN       |
| TC2000009903.hg.1 | 0.43768 | -1.1921 | 4.57E-07 | 6.3402 | HM13      |
| TC1600011408.hg.1 | 0.43718 | -1.1937 | 1.50E-05 | 4.8251 | CKLF      |
| TC0100018403.hg.1 | 0.43559 | -1.199  | 9.37E-07 | 6.0284 | ERRF1     |
| TC0600008120.hg.1 | 0.43538 | -1.1997 | 7.72E-06 | 5.1127 | TMEM63B   |
| TC1600011372.hg.1 | 0.43497 | -1.201  | 9.60E-06 | 5.0177 | SULT1A4   |
| TC1400009186.hg.1 | 0.43439 | -1.2029 | 0.00141  | 2.8507 | ERO1A     |
| TC0700008073.hg.1 | 0.43344 | -1.2061 | 0.007152 | 2.1456 | POR       |
| TC0700010167.hg.1 | 0.4307  | -1.2152 | 0.000647 | 3.189  | ACTB      |
| TC1200008933.hg.1 | 0.42796 | -1.2245 | 1.82E-06 | 5.7388 | TPCN1     |
| TC1100010156.hg.1 | 0.42765 | -1.2255 | 1.39E-08 | 7.8564 | BTBD10    |
| TC0400007556.hg.1 | 0.42746 | -1.2261 | 0.001443 | 2.8408 | SRD5A3    |
| TC0900007667.hg.1 | 0.42584 | -1.2316 | 0.0003   | 3.5236 | PSAT1     |
| TC0100015598.hg.1 | 0.42433 | -1.2368 | 0.000113 | 3.9473 | TXNIP     |
| TC1100008514.hg.1 | 0.42418 | -1.2372 | 0.000572 | 3.2426 | TSKU      |
| TC1700008920.hg.1 | 0.42345 | -1.2397 | 1.35E-10 | 9.8706 | ITGB4     |
| TC0900012047.hg.1 | 0.42159 | -1.2461 | 0.001807 | 2.7431 |           |
| TC0600012040.hg.1 | 0.42155 | -1.2462 | 8.17E-06 | 5.088  | TRAM2     |
| TC0500010835.hg.1 | 0.42013 | -1.2511 | 1.92E-05 | 4.7166 | PLK2      |
| TC0500007050.hg.1 | 0.41968 | -1.2526 | 0.009578 | 2.0187 | PDZD2     |
| TC1900006507.hg.1 | 0.41848 | -1.2568 | 6.21E-06 | 5.207  | CNN2      |
| TC0200011503.hg.1 | 0.41792 | -1.2587 | 3.49E-05 | 4.4577 | PXDN      |
| TC0700013082.hg.1 | 0.41709 | -1.2616 | 2.59E-06 | 5.5869 | PRKAG2    |
| TC0800012147.hg.1 | 0.41704 | -1.2617 | 1.49E-07 | 6.8272 | TSTA3     |
| TC2000008279.hg.1 | 0.41645 | -1.2638 | 1.42E-05 | 4.8486 | PCNA      |
| TC0100018451.hg.1 | 0.41535 | -1.2676 | 0.000736 | 3.1331 | GBP2      |
| TC1900008143.hg.1 | 0.41529 | -1.2678 | 1.21E-07 | 6.9186 | AXL       |
| TC1100012318.hg.1 | 0.41418 | -1.2717 | 1.97E-05 | 4.7065 | IL18      |
| TC0X00009044.hg.1 | 0.40965 | -1.2875 | 0.007735 | 2.1115 | GPR143    |
| TC1700008228.hg.1 | 0.40865 | -1.2911 | 7.28E-06 | 5.1377 | ITGA3     |
| TC0700006783.hg.1 | 0.40776 | -1.2942 | 3.46E-06 | 5.4606 | TSPAN13   |

|                   |         |         |          |        |            |
|-------------------|---------|---------|----------|--------|------------|
| TC1000011524.hg.1 | 0.40544 | -1.3025 | 1.13E-06 | 5.9472 | PIK3AP1    |
| TC1700012468.hg.1 | 0.40305 | -1.311  | 6.87E-05 | 4.1632 | HN1        |
| TC1700011097.hg.1 | 0.40263 | -1.3125 | 4.28E-07 | 6.3685 | LRRC59     |
| TC1200008675.hg.1 | 0.40239 | -1.3133 | 5.99E-09 | 8.2229 | TXNRD1     |
| TC0200009402.hg.1 | 0.4017  | -1.3158 | 0.000251 | 3.6    | MGAT5      |
| TC0800008243.hg.1 | 0.39819 | -1.3285 | 0.000101 | 3.9977 | PDP1       |
| TC0100010867.hg.1 | 0.39771 | -1.3302 | 7.39E-05 | 4.1312 | LAMC2      |
| TC1500007833.hg.1 | 0.39691 | -1.3331 | 1.04E-06 | 5.984  | PML        |
| TC1400006659.hg.1 | 0.39309 | -1.3471 | 3.29E-05 | 4.4824 | MMP14      |
| TC0400012458.hg.1 | 0.39256 | -1.349  | 0.001726 | 2.763  | HPGD       |
| TC1700011813.hg.1 | 0.38875 | -1.3631 | 0.011145 | 1.9529 | ST6GALNAC1 |
| TC2100008527.hg.1 | 0.38806 | -1.3656 | 3.80E-05 | 4.4204 | SLC37A1    |
| TC0600013326.hg.1 | 0.38424 | -1.3799 | 1.83E-10 | 9.7368 | PERP       |
| TC0600008622.hg.1 | 0.38417 | -1.3802 | 8.19E-05 | 4.0869 | SH3BGRL2   |
| TC1400007466.hg.1 | 0.38283 | -1.3852 | 2.33E-05 | 4.6328 | FUT8       |
| TC1900006977.hg.1 | 0.38166 | -1.3896 | 0.003451 | 2.462  | ICAM1      |
| TC0200013750.hg.1 | 0.37851 | -1.4016 | 4.64E-09 | 8.3333 | FHL2       |
| TC1700012216.hg.1 | 0.37814 | -1.403  | 7.13E-05 | 4.1466 | LGALS9     |
| TC1900011399.hg.1 | 0.37713 | -1.4069 | 9.77E-06 | 5.0103 | MBOAT7     |
| TC1000008891.hg.1 | 0.37376 | -1.4198 | 1.41E-08 | 7.8498 | DUSP5      |
| TC1700009236.hg.1 | 0.37329 | -1.4216 | 8.81E-09 | 8.055  | SLC16A3    |
| TC2200008687.hg.1 | 0.37196 | -1.4268 | 1.11E-07 | 6.954  | TMEM184B   |
| TC1000008236.hg.1 | 0.36729 | -1.445  | 0.000253 | 3.5967 | TSPAN14    |
| TC0600013757.hg.1 | 0.36379 | -1.4588 | 0.003136 | 2.5036 | SOD2       |
| TC0X00006799.hg.1 | 0.36262 | -1.4635 | 6.09E-13 | 12.215 | SAT1       |
| TC0300013520.hg.1 | 0.35963 | -1.4754 | 4.71E-07 | 6.3271 | CLDN1      |
| TC0100007584.hg.1 | 0.35964 | -1.4754 | 6.77E-05 | 4.1696 | PTPRU      |
| TC1600011453.hg.1 | 0.35665 | -1.4874 | 0.000203 | 3.6933 | MC1R       |
| TC0600011809.hg.1 | 0.35591 | -1.4904 | 8.23E-09 | 8.0843 | CCND3      |
| TC0300011815.hg.1 | 0.35052 | -1.5124 | 4.28E-06 | 5.3686 | DCBLD2     |
| TC0400007901.hg.1 | 0.3482  | -1.522  | 0.000298 | 3.5252 | SHROOM3    |
| TC1900008824.hg.1 | 0.34732 | -1.5257 | 0.000207 | 3.6847 |            |
| TC1100007273.hg.1 | 0.34525 | -1.5343 | 0.000114 | 3.9421 | CD44       |
| TC1900008287.hg.1 | 0.34356 | -1.5414 | 0.000102 | 3.9902 |            |
| TC0200015958.hg.1 | 0.34326 | -1.5426 | 0.002907 | 2.5366 | DNER       |
| TC1900011382.hg.1 | 0.34146 | -1.5502 | 0.005958 | 2.2249 |            |
| TC0800009529.hg.1 | 0.34073 | -1.5533 | 0.00079  | 3.1024 | PPP1R3B    |



|                   |         |         |          |        |           |
|-------------------|---------|---------|----------|--------|-----------|
| TC0600012434.hg.1 | 0.33895 | -1.5608 | 5.47E-08 | 7.262  | ME1       |
| TC0300006677.hg.1 | 0.33659 | -1.5709 | 7.59E-08 | 7.12   | SLC6A6    |
| TC1200010743.hg.1 | 0.33483 | -1.5785 | 0.000462 | 3.3355 |           |
| TC0700006629.hg.1 | 0.33469 | -1.5791 | 1.73E-07 | 6.761  | FSCN1     |
| TC0100017167.hg.1 | 0.33074 | -1.5962 | 8.76E-05 | 4.0576 | LAMB3     |
| TC1600011546.hg.1 | 0.32976 | -1.6005 | 0.00131  | 2.8826 | PLLP      |
| TC1700007135.hg.1 | 0.3288  | -1.6047 | 8.32E-07 | 6.0801 | TRIM16L   |
| TC1100012966.hg.1 | 0.32413 | -1.6254 | 0.001238 | 2.9074 | MICAL2    |
| TC0600009597.hg.1 | 0.32354 | -1.628  | 0.000156 | 3.8064 | TNFAIP3   |
| TC2000008315.hg.1 | 0.3222  | -1.634  | 8.54E-05 | 4.0688 |           |
| TC0800010002.hg.1 | 0.3213  | -1.638  | 6.50E-11 | 10.187 | DUSP4     |
| TC0700012684.hg.1 | 0.32023 | -1.6428 | 4.70E-09 | 8.3282 | AKR1B1    |
| TC1100008236.hg.1 | 0.31912 | -1.6478 | 2.63E-07 | 6.5799 | CCND1     |
| TC0800006975.hg.1 | 0.31813 | -1.6523 | 0.000571 | 3.2434 | BMP1      |
| TC0600007374.hg.1 | 0.31744 | -1.6554 | 0.000189 | 3.7234 | HIST1H2AI |
| TC0800009961.hg.1 | 0.31289 | -1.6763 | 5.90E-07 | 6.2288 | CLU       |
| TC0100012675.hg.1 | 0.31013 | -1.689  | 8.24E-06 | 5.0842 | ACOT7     |
| TC0800007888.hg.1 | 0.30276 | -1.7237 | 5.09E-05 | 4.2932 | C8orf34   |
| TC0200011138.hg.1 | 0.29549 | -1.7588 | 0.000245 | 3.6106 | UGT1A8    |
| TC1700008719.hg.1 | 0.29405 | -1.7659 | 0.000284 | 3.5468 | KPNA2     |
| TC1000012117.hg.1 | 0.29359 | -1.7681 | 1.23E-06 | 5.9097 | CHST15    |
| TC0600008146.hg.1 | 0.29299 | -1.7711 | 2.69E-06 | 5.5696 | RUNX2     |
| TC0100013028.hg.1 | 0.29212 | -1.7754 | 1.18E-08 | 7.9299 | EPHA2     |
| TC1100011602.hg.1 | 0.29158 | -1.778  | 3.59E-06 | 5.4446 | UCP2      |
| TC1200006896.hg.1 | 0.29118 | -1.78   | 9.62E-09 | 8.0169 | GRPRC5A   |
| TC0900008891.hg.1 | 0.28576 | -1.8071 | 7.17E-06 | 5.1443 | LRRC8A    |
| TC1200010538.hg.1 | 0.28108 | -1.831  | 5.43E-06 | 5.265  | AMIGO2    |
| TC0800011305.hg.1 | 0.28019 | -1.8355 | 0.000138 | 3.8605 | NCALD     |
| TC0700011809.hg.1 | 0.2745  | -1.8651 | 2.20E-07 | 6.6571 | TFPI2     |
| TC0100007645.hg.1 | 0.26936 | -1.8924 | 5.65E-05 | 4.2482 |           |
| TC2200007356.hg.1 | 0.26814 | -1.8989 | 3.17E-06 | 5.4986 | KDELRL3   |
| TC0500009863.hg.1 | 0.26748 | -1.9025 | 3.91E-07 | 6.4073 | LPCAT1    |
| TC1300007561.hg.1 | 0.26659 | -1.9073 | 0.00012  | 3.9197 | SCEL      |
| TC1100011375.hg.1 | 0.26547 | -1.9134 | 5.80E-05 | 4.2369 | C11orf24  |
| TC1100011259.hg.1 | 0.25626 | -1.9643 | 0.000468 | 3.3302 | FOSL1     |
| TC0400007806.hg.1 | 0.25497 | -1.9716 | 0.000111 | 3.953  | NPFFR2    |
| TC1100009110.hg.1 | 0.25447 | -1.9744 | 3.61E-09 | 8.4421 | NNMT      |

|                   |         |         |          |        |          |
|-------------------|---------|---------|----------|--------|----------|
| TC0300010350.hg.1 | 0.25146 | -1.9916 | 8.20E-09 | 8.0861 | WNT7A    |
| TC0600011232.hg.1 | 0.25107 | -1.9938 | 0.001114 | 2.9529 | HIST1H1B |
| TC1400007584.hg.1 | 0.24949 | -2.0029 | 1.90E-10 | 9.7207 | TTC9     |
| TC1900007465.hg.1 | 0.24739 | -2.0151 | 0.000395 | 3.4036 | ZNF486   |
| TC0500009424.hg.1 | 0.24601 | -2.0232 | 4.50E-07 | 6.3464 | FGF18    |
| TC2000009216.hg.1 | 0.24592 | -2.0238 | 2.67E-10 | 9.573  | SLPI     |
| TC0300010930.hg.1 | 0.24203 | -2.0468 | 0.008511 | 2.07   | SLC6A20  |
| TC0700010671.hg.1 | 0.23726 | -2.0755 | 5.82E-08 | 7.2352 | PDE1C    |
| TC1100012957.hg.1 | 0.23052 | -2.117  | 3.78E-10 | 9.4225 | TRIM22   |
| TC1500006925.hg.1 | 0.22674 | -2.1409 | 2.08E-07 | 6.6823 | THBS1    |
| TC0500012842.hg.1 | 0.22595 | -2.146  | 1.93E-08 | 7.7144 | DUSP1    |
| TC0100010798.hg.1 | 0.22564 | -2.1479 | 9.94E-05 | 4.0028 | QSOX1    |
| TC0500012294.hg.1 | 0.22316 | -2.1639 | 3.14E-11 | 10.504 | PCDH1    |
| TC1100007899.hg.1 | 0.22214 | -2.1705 | 1.31E-06 | 5.8813 | RARRES3  |
| TC2200007312.hg.1 | 0.21938 | -2.1885 | 0.000738 | 3.1321 | LGALS1   |
| TC2000008217.hg.1 | 0.2156  | -2.2136 | 1.35E-05 | 4.8702 | SLC4A11  |
| TC0400009129.hg.1 | 0.21487 | -2.2184 | 0.000484 | 3.3156 | RXFP1    |
| TC1700012274.hg.1 | 0.21284 | -2.2322 | 1.71E-09 | 8.7664 | ITGB3    |
| TC0400012949.hg.1 | 0.21135 | -2.2423 | 2.93E-07 | 6.5329 | SLC39A8  |
| TC0100014081.hg.1 | 0.20712 | -2.2715 | 2.42E-06 | 5.616  | PDZK1IP1 |
| TC0400011015.hg.1 | 0.20651 | -2.2757 | 1.86E-05 | 4.7312 | CXCL3    |
| TC0400009258.hg.1 | 0.19456 | -2.3617 | 0.001522 | 2.8175 | PALLD    |
| TC1300009580.hg.1 | 0.19444 | -2.3626 | 0.012917 | 1.8888 | SLC15A1  |
| TC0200008666.hg.1 | 0.18887 | -2.4045 | 0.004131 | 2.384  | IL1R1    |
| TC0400011920.hg.1 | 0.18542 | -2.4311 | 1.23E-08 | 7.9094 | SLC7A11  |
| TC1500010369.hg.1 | 0.1845  | -2.4383 | 1.77E-06 | 5.7511 | MFGE8    |
| TC1900010807.hg.1 | 0.18441 | -2.439  | 2.77E-06 | 5.557  | CEACAM1  |
| TC1500007062.hg.1 | 0.17982 | -2.4754 | 0.00292  | 2.5346 | CKMT1B   |
| TC1700006999.hg.1 | 0.1749  | -2.5154 | 4.44E-06 | 5.3525 | ADORA2B  |
| TC1400008677.hg.1 | 0.17152 | -2.5435 | 0.004188 | 2.378  | SLC7A7   |
| TC1600006658.hg.1 | 0.17124 | -2.5459 | 0.000145 | 3.8382 | IL32     |
| TC2000008316.hg.1 | 0.17065 | -2.5509 | 7.27E-06 | 5.1385 | LRRN4    |
| TC0100013445.hg.1 | 0.16766 | -2.5764 | 4.45E-11 | 10.352 | IFI6     |
| TC0700013394.hg.1 | 0.16603 | -2.5905 | 0.000554 | 3.2567 | CCDC146  |
| TC1200010229.hg.1 | 0.16516 | -2.5981 | 0.00017  | 3.7704 | PTHLH    |
| TC0700007198.hg.1 | 0.16375 | -2.6104 | 0.004703 | 2.3277 | ANLN     |
| TC1500007067.hg.1 | 0.16116 | -2.6334 | 0.002376 | 2.6242 | CKMT1A   |

|                         |          |         |          |        |           |
|-------------------------|----------|---------|----------|--------|-----------|
| TC1800006448.hg.1       | 0.15798  | -2.6622 | 0.000122 | 3.9126 | TYMS      |
| TC2100007208.hg.1       | 0.15792  | -2.6627 | 9.06E-07 | 6.0428 | MX1       |
| TC0400010125.hg.1       | 0.15476  | -2.6919 | 3.84E-06 | 5.4157 | FGFBP1    |
| TC1500009504.hg.1       | 0.15369  | -2.7019 | 0.001087 | 2.9637 | PYGO1     |
| TC0600014277.hg.1       | 0.15129  | -2.7246 | 0.00037  | 3.4323 | HLA-DMA   |
| TC0100009364.hg.1       | 0.14921  | -2.7446 | 1.10E-05 | 4.957  | CSF1      |
| TC0500007044.hg.1       | 0.1482   | -2.7544 | 2.71E-05 | 4.5673 | CDH6      |
| TC0400011748.hg.1       | 0.14583  | -2.7777 | 0.008592 | 2.0659 | CCNA2     |
| TC0700012230.hg.1       | 0.1455   | -2.7809 | 1.38E-06 | 5.8601 | NRCAM     |
| TC2000007341.hg.1       | 0.14068  | -2.8295 | 0.000997 | 3.0014 | FAM83D    |
| TC0100016206.hg.1       | 0.13915  | -2.8453 | 7.59E-05 | 4.1199 | SH2D1B    |
| TC0400007840.hg.1       | 0.13876  | -2.8494 | 2.43E-05 | 4.6141 | CXCL1     |
| TC1900011233.hg.1       | 0.13802  | -2.857  | 0.000387 | 3.4124 | KLK10     |
| TC0900007552.hg.1       | 0.13794  | -2.8579 | 0.006383 | 2.195  | GDA       |
| TC0600011945.hg.1       | 0.12846  | -2.9607 | 0.011625 | 1.9346 | RCAN2     |
| TC1600007235.hg.1       | 0.1017   | -3.2976 | 0.007249 | 2.1397 | PLK1      |
| TC1900011742.hg.1       | 0.099967 | -3.3224 | 0.013715 | 1.8628 | CEACAM6   |
| TC1200009834.hg.1       | 0.097926 | -3.3522 | 2.47E-09 | 8.6071 | MFAP5     |
| TC1500007409.hg.1       | 0.097731 | -3.355  | 7.57E-09 | 8.1211 | GCNT3     |
| TC0200013861.hg.1       | 0.094827 | -3.3986 | 1.42E-07 | 6.8463 | MALL      |
| TC0900008150.hg.1       | 0.08967  | -3.4792 | 1.20E-06 | 5.9222 | TMOD1     |
| TC0600011938.hg.1       | 0.087875 | -3.5084 | 0.000246 | 3.6094 | CLIC5     |
| TC1200009829.hg.1       | 0.081115 | -3.6239 | 6.17E-05 | 4.2095 | CLEC4E    |
| TC1900009559.hg.1       | 0.076812 | -3.7025 | 9.65E-06 | 5.0153 | MUC16     |
| TC0100017084.hg.1       | 0.074383 | -3.7489 | 0.004536 | 2.3433 | CTSE      |
| TC0300012236.hg.1       | 0.071818 | -3.7995 | 0.003439 | 2.4636 | MUC13     |
| TC0100014988.hg.1       | 0.070912 | -3.8178 | 0.001297 | 2.887  | F3        |
| TC0600014273.hg.1       | 0.066498 | -3.9105 | 0.007165 | 2.1448 | HLA-DRB1  |
| TC0500007738.hg.1       | 0.06374  | -3.9717 | 2.26E-05 | 4.646  | MAP1B     |
| TC0600014106.hg.1       | 0.061388 | -4.0259 | 0.005185 | 2.2852 | CFB       |
| TC0800011064.hg.1       | 0.059141 | -4.0797 | 0.017829 | 1.7489 | CALB1     |
| TC2100006834.hg.1       | 0.058336 | -4.0995 | 0.008615 | 2.0647 | LOC284825 |
| TC2200007204.hg.1       | 0.053933 | -4.2127 | 2.33E-05 | 4.6323 | HMOX1     |
| TC0500012470.hg.1       | 0.052216 | -4.2594 | 0.005671 | 2.2463 | CD74      |
| TC0400007836.hg.1       | 0.047995 | -4.381  | 5.49E-05 | 4.2607 | CXCL8     |
| TSUnmapped00000976.hg.1 | 0.047762 | -4.388  | 6.00E-08 | 7.222  |           |
| TC1900007242.hg.1       | 0.04709  | -4.4084 | 5.22E-09 | 8.2824 | UCA1      |

|                   |          |         |          |        |           |
|-------------------|----------|---------|----------|--------|-----------|
| TC0700006890.hg.1 | 0.042925 | -4.542  | 3.39E-06 | 5.4692 | IL6       |
| TC2000009058.hg.1 | 0.041941 | -4.5755 | 1.74E-06 | 5.7602 | TGM2      |
| TC1100013152.hg.1 | 0.039074 | -4.6777 | 0.00041  | 3.3875 | SAA2-SAA4 |
| TC1900006814.hg.1 | 0.038126 | -4.7131 | 0.006961 | 2.1573 |           |
| TC1100006995.hg.1 | 0.036336 | -4.7824 | 0.000687 | 3.1632 | SAA1      |
| TC1900011741.hg.1 | 0.03592  | -4.7991 | 0.002018 | 2.6952 | CEACAM5   |
| TC0300012768.hg.1 | 0.028993 | -5.1082 | 3.15E-05 | 4.5021 | CP        |
| TC0600007650.hg.1 | 0.020653 | -5.5975 | 0.008328 | 2.0794 | HLA-DRA   |
| TC0400011013.hg.1 | 0.01919  | -5.7035 | 0.021238 | 1.6729 | PPBP      |
| TC1400010618.hg.1 | 0.017087 | -5.8709 | 0.001273 | 2.8952 | FLI22447  |
| TC0900008847.hg.1 | 0.016101 | -5.9567 | 0.002616 | 2.5824 | LCN2      |
| TC0200010980.hg.1 | 0.015532 | -6.0086 | 0.010691 | 1.971  | CCL20     |
| TC1900009443.hg.1 | 0.010156 | -6.6215 | 0.000402 | 3.3953 | C3        |

| probe                   | FC | log2(FC) | raw.pval | #NAME?   | Gene Symbol    |
|-------------------------|----|----------|----------|----------|----------------|
| TC0X00006799.hg.1       |    | 0.36262  | -1.4635  | 6.09E-13 | 12.215 SAT1    |
| TC0500012294.hg.1       |    | 0.22316  | -2.1639  | 3.14E-11 | 10.504 PCDH1   |
| TC0100013445.hg.1       |    | 0.16766  | -2.5764  | 4.45E-11 | 10.352 IFI6    |
| TC0800010002.hg.1       |    | 0.3213   | -1.638   | 6.50E-11 | 10.187 DUSP4   |
| TC1700008920.hg.1       |    | 0.42345  | -1.2397  | 1.35E-10 | 9.8706 ITGB4   |
| TC0600013326.hg.1       |    | 0.38424  | -1.3799  | 1.83E-10 | 9.7368 PERP    |
| TC1400007584.hg.1       |    | 0.24949  | -2.0029  | 1.90E-10 | 9.7207 TTC9    |
| TC2000009216.hg.1       |    | 0.24592  | -2.0238  | 2.67E-10 | 9.573 SLPI     |
| TC1100012957.hg.1       |    | 0.23052  | -2.117   | 3.78E-10 | 9.4225 TRIM22  |
| TC1700012274.hg.1       |    | 0.21284  | -2.2322  | 1.71E-09 | 8.7664 ITGB3   |
| TC0100015586.hg.1       |    | 2.44     | 1.2869   | 1.73E-09 | 8.7614 PDZK1   |
| TC1200009834.hg.1       |    | 0.097926 | -3.3522  | 2.47E-09 | 8.6071 MFAP5   |
| TC1100009110.hg.1       |    | 0.25447  | -1.9744  | 3.61E-09 | 8.4421 NNMT    |
| TC0200013750.hg.1       |    | 0.37851  | -1.4016  | 4.64E-09 | 8.3333 FHL2    |
| TC0700012684.hg.1       |    | 0.32023  | -1.6428  | 4.70E-09 | 8.3282 AKR1B1  |
| TC1900007242.hg.1       |    | 0.04709  | -4.4084  | 5.22E-09 | 8.2824 UCA1    |
| TC0200009068.hg.1       |    | 11.823   | 3.5635   | 5.78E-09 | 8.2378         |
| TC1200008675.hg.1       |    | 0.40239  | -1.3133  | 5.99E-09 | 8.2229 TXNRD1  |
| TC1500007409.hg.1       |    | 0.097731 | -3.355   | 7.57E-09 | 8.1211 GCNT3   |
| TC0300010350.hg.1       |    | 0.25146  | -1.9916  | 8.20E-09 | 8.0861 WNT7A   |
| TC0600011809.hg.1       |    | 0.35591  | -1.4904  | 8.23E-09 | 8.0843 CCND3   |
| TC1700009236.hg.1       |    | 0.37329  | -1.4216  | 8.81E-09 | 8.055 SLC16A3  |
| TC1600010375.hg.1       |    | 2.3028   | 1.2034   | 9.43E-09 | 8.0254 CRNDE   |
| TC1200006896.hg.1       |    | 0.29118  | -1.78    | 9.62E-09 | 8.0169 GRPRCSA |
| TC1700011121.hg.1       |    | 0.45286  | -1.1429  | 1.14E-08 | 7.9423 TOB1    |
| TC0100013028.hg.1       |    | 0.29212  | -1.7754  | 1.18E-08 | 7.9299 EPHA2   |
| TSUnmapped00000340.hg.1 |    | 3.4471   | 1.7854   | 1.23E-08 | 7.9107         |

|                         |          |         |          |        |          |
|-------------------------|----------|---------|----------|--------|----------|
| TSUnmapped00000845.hg.1 | 3.4471   | 1.7854  | 1.23E-08 | 7.9107 |          |
| TC0400011920.hg.1       | 0.18542  | -2.4311 | 1.23E-08 | 7.9094 | SLC7A11  |
| TC0100015155.hg.1       | 4.0972   | 2.0346  | 1.31E-08 | 7.8838 | VAV3     |
| TC0100007486.hg.1       | 0.43909  | -1.1874 | 1.37E-08 | 7.8638 | SFN      |
| TC1100010156.hg.1       | 0.42765  | -1.2255 | 1.39E-08 | 7.8564 | BTBD10   |
| TC1000008891.hg.1       | 0.37376  | -1.4198 | 1.41E-08 | 7.8498 | DUSP5    |
| TC0500012842.hg.1       | 0.22595  | -2.146  | 1.93E-08 | 7.7144 | DUSP1    |
| TC0300013417.hg.1       | 0.4662   | -1.101  | 2.14E-08 | 7.6689 | LIPH     |
| TC0900009489.hg.1       | 0.48852  | -1.0335 | 2.32E-08 | 7.6342 | GLDC     |
| TC1300006543.hg.1       | 2.6118   | 1.3851  | 3.41E-08 | 7.4675 | FGF9     |
| TC0600012434.hg.1       | 0.33895  | -1.5608 | 5.47E-08 | 7.262  | ME1      |
| TC0700010671.hg.1       | 0.23726  | -2.0755 | 5.82E-08 | 7.2352 | PDE1C    |
| TSUnmapped00000976.hg.1 | 0.047762 | -4.388  | 6.00E-08 | 7.222  |          |
| TC0300006677.hg.1       | 0.33659  | -1.5709 | 7.59E-08 | 7.12   | SLC6A6   |
| TC1700008867.hg.1       | 0.48045  | -1.0576 | 7.67E-08 | 7.1153 | SLC9A3R1 |
| TSUnmapped00000267.hg.1 | 2.0076   | 1.0055  | 7.71E-08 | 7.113  |          |
| TC0900011582.hg.1       | 0.44094  | -1.1813 | 7.99E-08 | 7.0972 | FAM129B  |
| TC1000012050.hg.1       | 4.8468   | 2.277   | 8.43E-08 | 7.0743 | FGFR2    |
| TC0200010634.hg.1       | 2.7475   | 1.4581  | 1.09E-07 | 6.9618 |          |
| TC2200008687.hg.1       | 0.37196  | -1.4268 | 1.11E-07 | 6.954  | TMEM184B |
| TC1900008143.hg.1       | 0.41529  | -1.2678 | 1.21E-07 | 6.9186 | AXL      |
| TC1900011756.hg.1       | 0.43965  | -1.1856 | 1.33E-07 | 6.876  | PVR      |
| TSUnmapped00000154.hg.1 | 2.1741   | 1.1204  | 1.38E-07 | 6.8588 |          |
| TC0200013861.hg.1       | 0.094827 | -3.3986 | 1.42E-07 | 6.8463 | MALL     |
| TC0800012147.hg.1       | 0.41704  | -1.2617 | 1.49E-07 | 6.8272 | TSTA3    |
| TC0700006629.hg.1       | 0.33469  | -1.5791 | 1.73E-07 | 6.761  | FSCN1    |
| TC1800008474.hg.1       | 0.49214  | -1.0228 | 1.96E-07 | 6.707  | SLC39A6  |
| TC1500006925.hg.1       | 0.22674  | -2.1409 | 2.08E-07 | 6.6823 | THBS1    |
| TC0700011809.hg.1       | 0.2745   | -1.8651 | 2.20E-07 | 6.6571 | TFPI2    |
| TC1000009025.hg.1       | 4.5237   | 2.1775  | 2.51E-07 | 6.6008 | EMX2     |
| TC1100008236.hg.1       | 0.31912  | -1.6478 | 2.63E-07 | 6.5799 | CCND1    |
| TC1000012428.hg.1       | 0.49347  | -1.019  | 2.71E-07 | 6.5663 | AKR1C3   |
| TC0400012949.hg.1       | 0.21135  | -2.2423 | 2.93E-07 | 6.5329 | SLC39A8  |
| TC0600010057.hg.1       | 0.48923  | -1.0314 | 3.13E-07 | 6.5045 | ACAT2    |
| TC1000010273.hg.1       | 0.47748  | -1.0665 | 3.65E-07 | 6.4379 | NRP1     |
| TC0500009863.hg.1       | 0.26748  | -1.9025 | 3.91E-07 | 6.4073 | LPCAT1   |
| TC0100013229.hg.1       | 0.49161  | -1.0244 | 4.10E-07 | 6.3874 | HSPG2    |
| TC1700011097.hg.1       | 0.40263  | -1.3125 | 4.28E-07 | 6.3685 | LRRC59   |
| TC0500009424.hg.1       | 0.24601  | -2.0232 | 4.50E-07 | 6.3464 | FGF18    |
| TC2000009903.hg.1       | 0.43768  | -1.1921 | 4.57E-07 | 6.3402 | HM13     |
| TC0300013520.hg.1       | 0.35963  | -1.4754 | 4.71E-07 | 6.3271 | CLDN1    |
| TC0500010043.hg.1       | 3.8689   | 1.9519  | 4.94E-07 | 6.3061 | SEMA5A   |
| TC0900006522.hg.1       | 0.45658  | -1.1311 | 5.02E-07 | 6.299  | SLC1A1   |

|                   |          |         |          |        |          |
|-------------------|----------|---------|----------|--------|----------|
| TC0800009961.hg.1 | 0.31289  | -1.6763 | 5.90E-07 | 6.2288 | CLU      |
| TC0200015624.hg.1 | 6.613    | 2.7253  | 6.31E-07 | 6.2    |          |
| TC1700007135.hg.1 | 0.3288   | -1.6047 | 8.32E-07 | 6.0801 | TRIM16L  |
| TC2100007208.hg.1 | 0.15792  | -2.6627 | 9.06E-07 | 6.0428 | MX1      |
| TC0100018403.hg.1 | 0.43559  | -1.199  | 9.37E-07 | 6.0284 | ERRFI1   |
| TC1200012859.hg.1 | 0.4635   | -1.1094 | 9.54E-07 | 6.0202 | RHOF     |
| TC1500007833.hg.1 | 0.39691  | -1.3331 | 1.04E-06 | 5.984  | PML      |
| TC1000011524.hg.1 | 0.40544  | -1.3025 | 1.13E-06 | 5.9472 | PIK3AP1  |
| TC2000008095.hg.1 | 0.48952  | -1.0306 | 1.17E-06 | 5.9317 | TPD52L2  |
| TC0900008150.hg.1 | 0.08967  | -3.4792 | 1.20E-06 | 5.9222 | TMOD1    |
| TC1100012992.hg.1 | 0.4746   | -1.0752 | 1.20E-06 | 5.9207 | HSD17B12 |
| TC1000012117.hg.1 | 0.29359  | -1.7681 | 1.23E-06 | 5.9097 | CHST15   |
| TC1100007899.hg.1 | 0.22214  | -2.1705 | 1.31E-06 | 5.8813 | RARRS3   |
| TC0700012230.hg.1 | 0.1455   | -2.7809 | 1.38E-06 | 5.8601 | NRCAM    |
| TC2000009058.hg.1 | 0.041941 | -4.5755 | 1.74E-06 | 5.7602 | TGM2     |
| TC1500010369.hg.1 | 0.1845   | -2.4383 | 1.77E-06 | 5.7511 | MFGE8    |
| TC1200008933.hg.1 | 0.42796  | -1.2245 | 1.82E-06 | 5.7388 | TPCN1    |
| TC0700010348.hg.1 | 4.007    | 2.0025  | 1.91E-06 | 5.7197 | SOSTDC1  |
| TC0600011960.hg.1 | 0.49897  | -1.003  | 1.96E-06 | 5.7069 | TNFRSF21 |
| TC0100014081.hg.1 | 0.20712  | -2.2715 | 2.42E-06 | 5.616  | PDZK1IP1 |
| TC0400012829.hg.1 | 2.1567   | 1.1088  | 2.59E-06 | 5.5869 | ARHGEF38 |
| TC0700013082.hg.1 | 0.41709  | -1.2616 | 2.59E-06 | 5.5869 | PRKAG2   |
| TC0600008146.hg.1 | 0.29299  | -1.7711 | 2.69E-06 | 5.5696 | RUNX2    |
| TC1900010807.hg.1 | 0.18441  | -2.439  | 2.77E-06 | 5.557  | CEACAM1  |
| TC0800012176.hg.1 | 0.4565   | -1.1313 | 3.07E-06 | 5.5134 | PLEC     |
| TC2200007356.hg.1 | 0.26814  | -1.8989 | 3.17E-06 | 5.4986 | KDELR3   |
| TC0700006890.hg.1 | 0.042925 | -4.542  | 3.39E-06 | 5.4692 | IL6      |
| TC0700006783.hg.1 | 0.40776  | -1.2942 | 3.46E-06 | 5.4606 | TSPAN13  |
| TC1100011602.hg.1 | 0.29158  | -1.778  | 3.59E-06 | 5.4446 | UCP2     |
| TC0400010125.hg.1 | 0.15476  | -2.6919 | 3.84E-06 | 5.4157 | FGFBP1   |
| TC0300011815.hg.1 | 0.35052  | -1.5124 | 4.28E-06 | 5.3686 | DCBLD2   |
| TC1700006999.hg.1 | 0.1749   | -2.5154 | 4.44E-06 | 5.3525 | ADORA2B  |
| TC0100010284.hg.1 | 0.47521  | -1.0734 | 4.49E-06 | 5.3482 | PEA15    |
| TC1200010538.hg.1 | 0.28108  | -1.831  | 5.43E-06 | 5.265  | AMIGO2   |
| TC0200009756.hg.1 | 2.3176   | 1.2126  | 5.58E-06 | 5.2536 | PKP4     |
| TC1600008164.hg.1 | 0.49984  | -1.0005 | 5.81E-06 | 5.236  | FAM65A   |
| TC1900006507.hg.1 | 0.41848  | -1.2568 | 6.21E-06 | 5.207  | CNN2     |
| TC0900008891.hg.1 | 0.28576  | -1.8071 | 7.17E-06 | 5.1443 | LRRC8A   |
| TC2000008316.hg.1 | 0.17065  | -2.5509 | 7.27E-06 | 5.1385 | LRRN4    |
| TC1700008228.hg.1 | 0.40865  | -1.2911 | 7.28E-06 | 5.1377 | ITGA3    |
| TC0600008120.hg.1 | 0.43538  | -1.1997 | 7.72E-06 | 5.1127 | TMEM63B  |
| TC0600012040.hg.1 | 0.42155  | -1.2462 | 8.17E-06 | 5.088  | TRAM2    |
| TC0100012675.hg.1 | 0.31013  | -1.689  | 8.24E-06 | 5.0842 | ACOT7    |

|                   |          |         |          |        |          |
|-------------------|----------|---------|----------|--------|----------|
| TC0500007114.hg.1 | 0.45413  | -1.1388 | 9.12E-06 | 5.0401 | RAI14    |
| TC1600011372.hg.1 | 0.43497  | -1.201  | 9.60E-06 | 5.0177 | SULT1A4  |
| TC1900009559.hg.1 | 0.076812 | -3.7025 | 9.65E-06 | 5.0153 | MUC16    |
| TC1900011399.hg.1 | 0.37713  | -1.4069 | 9.77E-06 | 5.0103 | MBOAT7   |
| TC0100009364.hg.1 | 0.14921  | -2.7446 | 1.10E-05 | 4.957  | CSF1     |
| TC0300013151.hg.1 | 0.48248  | -1.0515 | 1.19E-05 | 4.925  | NCEH1    |
| TC0700009061.hg.1 | 0.4902   | -1.0286 | 1.19E-05 | 4.9248 | CALU     |
| TC2000008217.hg.1 | 0.2156   | -2.2136 | 1.35E-05 | 4.8702 | SLC4A11  |
| TC2000008279.hg.1 | 0.41645  | -1.2638 | 1.42E-05 | 4.8486 | PCNA     |
| TC1600011408.hg.1 | 0.43718  | -1.1937 | 1.50E-05 | 4.8251 | CKLF     |
| TC0900010506.hg.1 | 0.45652  | -1.1313 | 1.53E-05 | 4.8164 | KRT18P24 |
| TC0400010242.hg.1 | 2.8841   | 1.5281  | 1.57E-05 | 4.804  | PPARGC1A |
| TC0100015871.hg.1 | 0.48486  | -1.0444 | 1.71E-05 | 4.7671 | S100A16  |
| TC0400011015.hg.1 | 0.20651  | -2.2757 | 1.86E-05 | 4.7312 | CXCL3    |
| TC0500010835.hg.1 | 0.42013  | -1.2511 | 1.92E-05 | 4.7166 | PLK2     |
| TC1200007686.hg.1 | 0.48736  | -1.037  | 1.93E-05 | 4.7155 | KRT18    |
| TC1100012318.hg.1 | 0.41418  | -1.2717 | 1.97E-05 | 4.7065 | IL18     |
| TC1100009514.hg.1 | 0.44454  | -1.1696 | 2.07E-05 | 4.6831 | TMEM45B  |
| TC1600007449.hg.1 | 0.48523  | -1.0433 | 2.12E-05 | 4.673  | SLX1A    |
| TC1400009147.hg.1 | 0.48609  | -1.0407 | 2.19E-05 | 4.6603 | PYGL     |
| TC0500007738.hg.1 | 0.06374  | -3.9717 | 2.26E-05 | 4.646  | MAP1B    |
| TC1400007466.hg.1 | 0.38283  | -1.3852 | 2.33E-05 | 4.6328 | FUT8     |
| TC2200007204.hg.1 | 0.053933 | -4.2127 | 2.33E-05 | 4.6323 | HMOX1    |
| TC0X00010793.hg.1 | 0.49317  | -1.0198 | 2.43E-05 | 4.6142 | ZDHHC9   |
| TC0400007840.hg.1 | 0.13876  | -2.8494 | 2.43E-05 | 4.6141 | CXCL1    |
| TC0500007044.hg.1 | 0.1482   | -2.7544 | 2.71E-05 | 4.5673 | CDH6     |
| TC0300012768.hg.1 | 0.028993 | -5.1082 | 3.15E-05 | 4.5021 | CP       |
| TC1400006659.hg.1 | 0.39309  | -1.3471 | 3.29E-05 | 4.4824 | MMP14    |
| TC2200008886.hg.1 | 0.48585  | -1.0414 | 3.45E-05 | 4.4619 | CYB5R3   |
| TC0200011503.hg.1 | 0.41792  | -1.2587 | 3.49E-05 | 4.4577 | PXDN     |
| TC1800007014.hg.1 | 0.4541   | -1.1389 | 3.78E-05 | 4.423  | DSG2     |
| TC2100008527.hg.1 | 0.38806  | -1.3656 | 3.80E-05 | 4.4204 | SLC37A1  |
| TC0100013205.hg.1 | 0.45218  | -1.145  | 4.55E-05 | 4.342  | ECE1     |
| TC1100013040.hg.1 | 0.48914  | -1.0317 | 4.79E-05 | 4.3201 | TM7SF2   |
| TC2200009257.hg.1 | 0.48866  | -1.0331 | 5.06E-05 | 4.2957 | TCN2     |
| TC0800007888.hg.1 | 0.30276  | -1.7237 | 5.09E-05 | 4.2932 | C8orf34  |
| TC0400007836.hg.1 | 0.047995 | -4.381  | 5.49E-05 | 4.2607 | CXCL8    |
| TC0100007645.hg.1 | 0.26936  | -1.8924 | 5.65E-05 | 4.2482 |          |
| TC0100017116.hg.1 | 0.49717  | -1.0082 | 5.73E-05 | 4.2422 | C1orf116 |
| TC1100011375.hg.1 | 0.26547  | -1.9134 | 5.80E-05 | 4.2369 | C11orf24 |
| TC0200015616.hg.1 | 3.2787   | 1.7131  | 5.94E-05 | 4.226  | ERBB4    |
| TC1200009829.hg.1 | 0.081115 | -3.6239 | 6.17E-05 | 4.2095 | CLEC4E   |
| TC1600008992.hg.1 | 2.9855   | 1.578   | 6.76E-05 | 4.17   |          |

|                   |          |         |          |        |           |
|-------------------|----------|---------|----------|--------|-----------|
| TC0100007584.hg.1 | 0.35964  | -1.4754 | 6.77E-05 | 4.1696 | PTPRU     |
| TC1700012468.hg.1 | 0.40305  | -1.311  | 6.87E-05 | 4.1632 | HN1       |
| TC1700012216.hg.1 | 0.37814  | -1.403  | 7.13E-05 | 4.1466 | LGALS9    |
| TC1000012139.hg.1 | 0.49177  | -1.0239 | 7.20E-05 | 4.1424 | CTBP2     |
| TC0100010867.hg.1 | 0.39771  | -1.3302 | 7.39E-05 | 4.1312 | LAMC2     |
| TC0100016206.hg.1 | 0.13915  | -2.8453 | 7.59E-05 | 4.1199 | SH2D1B    |
| TC0600008622.hg.1 | 0.38417  | -1.3802 | 8.19E-05 | 4.0869 | SH3BGR12  |
| TC2000008315.hg.1 | 0.3222   | -1.634  | 8.54E-05 | 4.0688 |           |
| TC0100017167.hg.1 | 0.33074  | -1.5962 | 8.76E-05 | 4.0576 | LAMB3     |
| TC2100007316.hg.1 | 0.46381  | -1.1084 | 9.64E-05 | 4.0159 |           |
| TC0200010630.hg.1 | 2.5444   | 1.3473  | 9.84E-05 | 4.0072 |           |
| TC0100010798.hg.1 | 0.22564  | -2.1479 | 9.94E-05 | 4.0028 | QSOX1     |
| TC0800008243.hg.1 | 0.39819  | -1.3285 | 0.000101 | 3.9977 | PDP1      |
| TC2100007485.hg.1 | 0.47686  | -1.0684 | 0.000101 | 3.9937 |           |
| TC1900008287.hg.1 | 0.34356  | -1.5414 | 0.000102 | 3.9902 |           |
| TC1700012073.hg.1 | 0.49758  | -1.007  | 0.000109 | 3.9614 | P4HB      |
| TC0400007806.hg.1 | 0.25497  | -1.9716 | 0.000111 | 3.953  | NPFFR2    |
| TC0100015598.hg.1 | 0.42433  | -1.2368 | 0.000113 | 3.9473 | TXNIP     |
| TC1100007273.hg.1 | 0.34525  | -1.5343 | 0.000114 | 3.9421 | CD44      |
| TC0200009067.hg.1 | 3.3615   | 1.7491  | 0.00012  | 3.9223 | TMEM37    |
| TC1300007561.hg.1 | 0.26659  | -1.9073 | 0.00012  | 3.9197 | SCEL      |
| TC1800006448.hg.1 | 0.15798  | -2.6622 | 0.000122 | 3.9126 | TYMS      |
| TC0900009274.hg.1 | 0.46329  | -1.11   | 0.000127 | 3.8967 | TUBB4B    |
| TC2200007242.hg.1 | 0.48913  | -1.0317 | 0.000135 | 3.8692 | APOL1     |
| TC0800011305.hg.1 | 0.28019  | -1.8355 | 0.000138 | 3.8605 | NCALD     |
| TC1600006658.hg.1 | 0.17124  | -2.5459 | 0.000145 | 3.8382 | IL32      |
| TC0600009597.hg.1 | 0.32354  | -1.628  | 0.000156 | 3.8064 | TNFAIP3   |
| TC1600010732.hg.1 | 0.45335  | -1.1413 | 0.000158 | 3.8    | NQO1      |
| TC0400007799.hg.1 | 4.0266   | 2.0095  | 0.000164 | 3.7842 | SLC4A4    |
| TC1800006897.hg.1 | 0.46998  | -1.0893 | 0.000168 | 3.7741 | LAMA3     |
| TC1200010229.hg.1 | 0.16516  | -2.5981 | 0.00017  | 3.7704 | PTHLH     |
| TC0200007418.hg.1 | 3.1093   | 1.6366  | 0.000173 | 3.7611 | SLC3A1    |
| TC0600007374.hg.1 | 0.31744  | -1.6554 | 0.000189 | 3.7234 | HIST1H2AI |
| TC2200008592.hg.1 | 0.46575  | -1.1024 | 0.000192 | 3.7166 | APOL2     |
| TC1600011453.hg.1 | 0.35665  | -1.4874 | 0.000203 | 3.6933 | MC1R      |
| TC1000008054.hg.1 | 0.45763  | -1.1278 | 0.000203 | 3.6917 | PLAU      |
| TC1900007012.hg.1 | 0.44609  | -1.1646 | 0.000206 | 3.6865 | LDLR      |
| TC1900008824.hg.1 | 0.34732  | -1.5257 | 0.000207 | 3.6847 |           |
| TC0600011185.hg.1 | 0.45824  | -1.1258 | 0.000225 | 3.6476 | HIST1H2BK |
| TC0200011138.hg.1 | 0.29549  | -1.7588 | 0.000245 | 3.6106 | UGT1A8    |
| TC0600011938.hg.1 | 0.087875 | -3.5084 | 0.000246 | 3.6094 | CLIC5     |
| TC0200009402.hg.1 | 0.4017   | -1.3158 | 0.000251 | 3.6    | MGAT5     |
| TC1000008236.hg.1 | 0.36729  | -1.445  | 0.000253 | 3.5967 | TSPAN14   |



|                   |          |         |          |        |            |
|-------------------|----------|---------|----------|--------|------------|
| TC1700010994.hg.1 | 2.4595   | 1.2983  | 0.000275 | 3.5603 |            |
| TC1700008719.hg.1 | 0.29405  | -1.7659 | 0.000284 | 3.5468 | KPNA2      |
| TC1700009651.hg.1 | 0.49563  | -1.0127 | 0.000291 | 3.5364 | TP53       |
| TC0400007901.hg.1 | 0.3482   | -1.522  | 0.000298 | 3.5252 | SHROOM3    |
| TC0900007667.hg.1 | 0.42584  | -1.2316 | 0.0003   | 3.5236 | PSAT1      |
| TC1100011367.hg.1 | 0.49317  | -1.0198 | 0.000301 | 3.5211 | UNC93B1    |
| TC0800010193.hg.1 | 0.47666  | -1.069  | 0.000343 | 3.4644 | TM2D2      |
| TC0600014277.hg.1 | 0.15129  | -2.7246 | 0.00037  | 3.4323 | HLA-DMA    |
| TC1400008940.hg.1 | 0.4929   | -1.0206 | 0.00038  | 3.4204 | NFKBIA     |
| TC1900011233.hg.1 | 0.13802  | -2.857  | 0.000387 | 3.4124 | KLK10      |
| TC1900010851.hg.1 | 0.47327  | -1.0793 | 0.000388 | 3.4107 | ETHE1      |
| TC1900007465.hg.1 | 0.24739  | -2.0151 | 0.000395 | 3.4036 | ZNF486     |
| TC1100007844.hg.1 | 0.49893  | -1.0031 | 0.000401 | 3.3965 | ASRGL1     |
| TC1900009443.hg.1 | 0.010156 | -6.6215 | 0.000402 | 3.3953 | C3         |
| TC1100013152.hg.1 | 0.039074 | -4.6777 | 0.00041  | 3.3875 | SAA2-SAA4  |
| TC0400010418.hg.1 | 0.49759  | -1.007  | 0.000436 | 3.3606 | RELL1      |
| TC1200010743.hg.1 | 0.33483  | -1.5785 | 0.000462 | 3.3355 |            |
| TC1100011259.hg.1 | 0.25626  | -1.9643 | 0.000468 | 3.3302 | FOSL1      |
| TC1400009529.hg.1 | 0.48263  | -1.051  | 0.000481 | 3.3177 | ACTN1      |
| TC0400009129.hg.1 | 0.21487  | -2.2184 | 0.000484 | 3.3156 | RXFP1      |
| TC0600011173.hg.1 | 2.1903   | 1.1311  | 0.000518 | 3.286  | GUSBP2     |
| TC0700013394.hg.1 | 0.16603  | -2.5905 | 0.000554 | 3.2567 | CCDC146    |
| TC0800006975.hg.1 | 0.31813  | -1.6523 | 0.000571 | 3.2434 | BMP1       |
| TC1100008514.hg.1 | 0.42418  | -1.2372 | 0.000572 | 3.2426 | TSKU       |
| TC0700010167.hg.1 | 0.4307   | -1.2152 | 0.000647 | 3.189  | ACTB       |
| TC1100006995.hg.1 | 0.036336 | -4.7824 | 0.000687 | 3.1632 | SAA1       |
| TC1600011505.hg.1 | 2.0302   | 1.0216  | 0.000697 | 3.1567 | NPIP84     |
| TC0100018451.hg.1 | 0.41535  | -1.2676 | 0.000736 | 3.1331 | GBP2       |
| TC2200007312.hg.1 | 0.21938  | -2.1885 | 0.000738 | 3.1321 | LGALS1     |
| TC0700006913.hg.1 | 6.425    | 2.6837  | 0.000752 | 3.1239 | GNPMB      |
| TC0800009529.hg.1 | 0.34073  | -1.5533 | 0.00079  | 3.1024 | PPP1R3B    |
| TC0100018482.hg.1 | 0.49053  | -1.0276 | 0.000881 | 3.0551 | HIST2H2AA3 |
| TC0100009876.hg.1 | 0.4684   | -1.0942 | 0.0009   | 3.0456 | HIST2H2AA3 |
| TC0500011352.hg.1 | 2.0515   | 1.0367  | 0.000926 | 3.0333 | EDIL3      |
| TC1400007950.hg.1 | 0.46593  | -1.1018 | 0.000942 | 3.026  | CALM1      |
| TC0800007367.hg.1 | 0.45395  | -1.1394 | 0.000949 | 3.0229 | ADAM9      |
| TC0100016112.hg.1 | 0.49506  | -1.0143 | 0.000991 | 3.0038 | TAGLN2     |
| TC1900007844.hg.1 | 0.49088  | -1.0266 | 0.000994 | 3.0028 | LSR        |
| TC2000007341.hg.1 | 0.14068  | -2.8295 | 0.000997 | 3.0014 | FAM83D     |
| TC1600009958.hg.1 | 2.0587   | 1.0417  | 0.001079 | 2.9672 | LOC613037  |
| TC1500009504.hg.1 | 0.15369  | -2.7019 | 0.001087 | 2.9637 | PYGO1      |
| TC0600011232.hg.1 | 0.25107  | -1.9938 | 0.001114 | 2.9529 | HIST1H1B   |
| TC1600011501.hg.1 | 2.1411   | 1.0983  | 0.001158 | 2.9363 | NPIP83     |

|                   |          |         |          |        |           |
|-------------------|----------|---------|----------|--------|-----------|
| TC1600011364.hg.1 | 2.4108   | 1.2695  | 0.0012   | 2.9207 | NPIP85    |
| TC1100012966.hg.1 | 0.32413  | -1.6254 | 0.001238 | 2.9074 | MICAL2    |
| TC1400010618.hg.1 | 0.017087 | -5.8709 | 0.001273 | 2.8952 | FLJ22447  |
| TC0100014988.hg.1 | 0.070912 | -3.8178 | 0.001297 | 2.887  | F3        |
| TC1600011546.hg.1 | 0.32976  | -1.6005 | 0.00131  | 2.8826 | PLLP      |
| TC0100015696.hg.1 | 0.47025  | -1.0885 | 0.001321 | 2.8792 | HIST2H2BF |
| TC1700006585.hg.1 | 0.46509  | -1.1044 | 0.00135  | 2.8697 | CTNS      |
| TC1400009186.hg.1 | 0.43439  | -1.2029 | 0.00141  | 2.8507 | ERO1A     |
| TC0400007556.hg.1 | 0.42746  | -1.2261 | 0.001443 | 2.8408 | SRD5A3    |
| TC0400009258.hg.1 | 0.19456  | -2.3617 | 0.001522 | 2.8175 | PALLD     |
| TC0400012458.hg.1 | 0.39256  | -1.349  | 0.001726 | 2.763  | HPGD      |
| TC0700012917.hg.1 | 0.46283  | -1.1115 | 0.001787 | 2.7478 | TPK1      |
| TC0900012047.hg.1 | 0.42159  | -1.2461 | 0.001807 | 2.7431 |           |
| TC0100011736.hg.1 | 0.47495  | -1.0742 | 0.001822 | 2.7395 | DEGS1     |
| TC1900011741.hg.1 | 0.03592  | -4.7991 | 0.002018 | 2.6952 | CEACAM5   |
| TC1500007067.hg.1 | 0.16116  | -2.6334 | 0.002376 | 2.6242 | CKMT1A    |
| TC1600009929.hg.1 | 2.0918   | 1.0647  | 0.002389 | 2.6218 |           |
| TC0900008847.hg.1 | 0.016101 | -5.9567 | 0.002616 | 2.5824 | LCN2      |
| TC0100015544.hg.1 | 0.44764  | -1.1596 | 0.002637 | 2.5789 | HIST2H2BB |
| TC0200015958.hg.1 | 0.34326  | -1.5426 | 0.002907 | 2.5366 | DNER      |
| TC1500007062.hg.1 | 0.17982  | -2.4754 | 0.00292  | 2.5346 | CKMT1B    |
| TC1600011514.hg.1 | 2.3015   | 1.2026  | 0.002922 | 2.5343 | SMG1P2    |
| TC0600013757.hg.1 | 0.36379  | -1.4588 | 0.003136 | 2.5036 | SOD2      |
| TC0300012236.hg.1 | 0.071818 | -3.7995 | 0.003439 | 2.4636 | MUC13     |
| TC1900006977.hg.1 | 0.38166  | -1.3896 | 0.003451 | 2.462  | ICAM1     |
| TC0400012621.hg.1 | 2.5497   | 1.3503  | 0.003615 | 2.4419 | ACSL1     |
| TC0300013282.hg.1 | 2.6038   | 1.3806  | 0.003741 | 2.4271 | RNA5SP149 |
| TC0700006468.hg.1 | 2.4254   | 1.2782  | 0.003886 | 2.4105 |           |
| TC0300007067.hg.1 | 0.47652  | -1.0694 | 0.004089 | 2.3884 | MYD88     |
| TC0200008666.hg.1 | 0.18887  | -2.4045 | 0.004131 | 2.384  | IL1R1     |
| TC1400008677.hg.1 | 0.17152  | -2.5435 | 0.004188 | 2.378  | SLC7A7    |
| TC1900009076.hg.1 | 0.47068  | -1.0872 | 0.004501 | 2.3467 | PLPP2     |
| TC0100017084.hg.1 | 0.074383 | -3.7489 | 0.004536 | 2.3433 | CTSE      |
| TC0700007198.hg.1 | 0.16375  | -2.6104 | 0.004703 | 2.3277 | ANLN      |
| TC0700008182.hg.1 | 2.8222   | 1.4968  | 0.005039 | 2.2976 |           |
| TC0600014106.hg.1 | 0.061388 | -4.0259 | 0.005185 | 2.2852 | CFB       |
| TC0500012470.hg.1 | 0.052216 | -4.2594 | 0.005671 | 2.2463 | CD74      |
| TC1900011382.hg.1 | 0.34146  | -1.5502 | 0.005958 | 2.2249 |           |
| TC0900007552.hg.1 | 0.13794  | -2.8579 | 0.006383 | 2.195  | GDA       |
| TC0X00007190.hg.1 | 0.45381  | -1.1398 | 0.00642  | 2.1925 | PORCN     |
| TC1900006814.hg.1 | 0.038126 | -4.7131 | 0.006961 | 2.1573 |           |
| TC0700008073.hg.1 | 0.43344  | -1.2061 | 0.007152 | 2.1456 | POR       |
| TC0600014273.hg.1 | 0.066498 | -3.9105 | 0.007165 | 2.1448 | HLA-DRB1  |

|                   |          |         |          |        |            |
|-------------------|----------|---------|----------|--------|------------|
| TC1600007235.hg.1 | 0.1017   | -3.2976 | 0.007249 | 2.1397 | PLK1       |
| TC0X00009044.hg.1 | 0.40965  | -1.2875 | 0.007735 | 2.1115 | GPR143     |
| TC0600007650.hg.1 | 0.020653 | -5.5975 | 0.008328 | 2.0794 | HLA-DRA    |
| TC0300010930.hg.1 | 0.24203  | -2.0468 | 0.008511 | 2.07   | SLC6A20    |
| TC0400011748.hg.1 | 0.14583  | -2.7777 | 0.008592 | 2.0659 | CCNA2      |
| TC2100006834.hg.1 | 0.058336 | -4.0995 | 0.008615 | 2.0647 | LOC284825  |
| TC0500007050.hg.1 | 0.41968  | -1.2526 | 0.009578 | 2.0187 | PDZD2      |
| TC0200010980.hg.1 | 0.015532 | -6.0086 | 0.010691 | 1.971  | CCL20      |
| TC1700011813.hg.1 | 0.38875  | -1.3631 | 0.011145 | 1.9529 | ST6GALNAC1 |
| TC0600011945.hg.1 | 0.12846  | -2.9607 | 0.011625 | 1.9346 | RCAN2      |
| TC1800007431.hg.1 | 0.49138  | -1.0251 | 0.012426 | 1.9057 | MALT1      |
| TC1300009580.hg.1 | 0.19444  | -2.3626 | 0.012917 | 1.8888 | SLC15A1    |
| TC1900011742.hg.1 | 0.099967 | -3.3224 | 0.013715 | 1.8628 | CEACAM6    |
| TC1100008018.hg.1 | 2.2224   | 1.1521  | 0.015263 | 1.8163 | NEAT1      |
| TC0800011064.hg.1 | 0.059141 | -4.0797 | 0.017829 | 1.7489 | CALB1      |
| TC0100014193.hg.1 | 0.46737  | -1.0974 | 0.018817 | 1.7254 | TXNDC12    |
| TC0400011013.hg.1 | 0.01919  | -5.7035 | 0.021238 | 1.6729 | PPBP       |
| TC1000010567.hg.1 | 2.1258   | 1.088   | 0.031064 | 1.5077 |            |
| TC0800006869.hg.1 | 0.49649  | -1.0102 | 0.038739 | 1.4118 | SLC7A2     |
| TC1500007695.hg.1 | 2.3539   | 1.235   | 0.039202 | 1.4067 | PAQR5      |

Supplementary Table 16A: Upregulated Gene Set Enrichment Analysis for significant genes between iAs+ and iAs- with nominal p-value < 0.05.

| GS                                                                          | Size | ES   | NES  | NOM p-val | FDR q-val | FWER p-val | Rank at Max | Leading Edge                     |
|-----------------------------------------------------------------------------|------|------|------|-----------|-----------|------------|-------------|----------------------------------|
| <a href="#">REACTOME_METABOLISM_OF_LIPIDS</a>                               | 20   | 0.35 | 1.97 | 0         | 1         | 0.694      | 188         | tags=100%, list=67%, signal=285% |
| <a href="#">REN_ALVEOLAR_RHABDOMYOSARCOMA_DN</a>                            | 30   | 0.24 | 1.61 | 0         | 1         | 1          | 219         | tags=100%, list=78%, signal=415% |
| <a href="#">CATTTC_MIR203</a>                                               | 5    | 0.84 | 2.23 | 0         | 0.35      | 0.16       | 6           | tags=80%, list=2%, signal=80%    |
| <a href="#">TTTTGAG_MIR373</a>                                              | 5    | 0.81 | 2.15 | 0         | 0.306     | 0.262      | 17          | tags=80%, list=6%, signal=84%    |
| <a href="#">HNF1_C</a>                                                      | 7    | 0.66 | 2.09 | 0         | 0.31      | 0.375      | 99          | tags=100%, list=35%, signal=151% |
| <a href="#">ER_Q6_01</a>                                                    | 6    | 0.68 | 2.03 | 0         | 0.342     | 0.5        | 42          | tags=83%, list=15%, signal=96%   |
| <a href="#">SOX5_01</a>                                                     | 8    | 0.59 | 1.96 | 0         | 0.368     | 0.66       | 34          | tags=63%, list=12%, signal=69%   |
| CHAF1B_TARGET_GENES                                                         | 21   | 0.29 | 1.63 | 0         | 0.568     | 0.998      | 204         | tags=100%, list=73%, signal=344% |
| <a href="#">TGCGCANK_UNKNOWN</a>                                            | 6    | 0.66 | 1.93 | 0.004     | 0.396     | 0.748      | 98          | tags=100%, list=35%, signal=151% |
| <a href="#">MIR2052</a>                                                     | 6    | 0.67 | 1.9  | 0.004     | 0.364     | 0.793      | 22          | tags=83%, list=8%, signal=89%    |
| <a href="#">AMEF2_Q6</a>                                                    | 7    | 0.58 | 1.84 | 0.005     | 0.337     | 0.904      | 11          | tags=57%, list=4%, signal=58%    |
| <a href="#">SNRNP70_TARGET_GENES</a>                                        | 11   | 0.49 | 1.92 | 0.006     | 0.377     | 0.77       | 146         | tags=100%, list=52%, signal=202% |
| <a href="#">ZNF618_TARGET_GENES</a>                                         | 18   | 0.39 | 2.03 | 0.01      | 0.284     | 0.512      | 155         | tags=94%, list=56%, signal=199%  |
| <a href="#">MULLIGHAN_NPM1_SIGNATURE_3_UP</a>                               | 5    | 0.68 | 1.77 | 0.011     | 1         | 0.985      | 41          | tags=80%, list=15%, signal=92%   |
| <a href="#">GATA4_Q3</a>                                                    | 5    | 0.69 | 1.88 | 0.011     | 0.378     | 0.848      | 89          | tags=100%, list=32%, signal=144% |
| <a href="#">GREB1_TARGET_GENES</a>                                          | 18   | 0.36 | 1.84 | 0.012     | 0.317     | 0.905      | 82          | tags=67%, list=29%, signal=88%   |
| <a href="#">MIR5696</a>                                                     | 7    | 0.54 | 1.73 | 0.014     | 0.503     | 0.983      | 131         | tags=100%, list=47%, signal=184% |
| <a href="#">DELYS_THYROID_CANCER_DN</a>                                     | 5    | 0.69 | 1.84 | 0.015     | 1         | 0.936      | 89          | tags=100%, list=32%, signal=144% |
| HMGA1_TARGET_GENES                                                          | 10   | 0.44 | 1.66 | 0.017     | 0.559     | 0.997      | 124         | tags=90%, list=44%, signal=156%  |
| <a href="#">ZNF843_TARGET_GENES</a>                                         | 12   | 0.45 | 1.87 | 0.02      | 0.35      | 0.854      | 60          | tags=67%, list=22%, signal=81%   |
| <a href="#">FEV_TARGET_GENES</a>                                            | 19   | 0.35 | 1.85 | 0.022     | 0.366     | 0.89       | 159         | tags=95%, list=57%, signal=205%  |
| <a href="#">ZNF8_TARGET_GENES</a>                                           | 9    | 0.48 | 1.73 | 0.022     | 0.53      | 0.982      | 149         | tags=100%, list=53%, signal=208% |
| MIR124_3P                                                                   | 17   | 0.32 | 1.6  | 0.024     | 0.607     | 0.999      | 166         | tags=94%, list=59%, signal=218%  |
| <a href="#">PECE_MAMMARY_STEM_CELL_DN</a>                                   | 7    | 0.53 | 1.67 | 0.027     | 1         | 1          | 134         | tags=100%, list=48%, signal=188% |
| <a href="#">CTATGCA_MIR153</a>                                              | 5    | 0.68 | 1.84 | 0.027     | 0.359     | 0.904      | 10          | tags=60%, list=4%, signal=61%    |
| <a href="#">VANDESLUIS_COMMD1_TARGETS_GROUP_3_UP</a>                        | 8    | 0.49 | 1.65 | 0.032     | 1         | 1          | 146         | tags=100%, list=52%, signal=204% |
| <a href="#">REACTOME_CONSTITUTIVE_SIGNALING_BY_A_BERRANT_PI3K_IN_CANCER</a> | 5    | 0.58 | 1.6  | 0.032     | 1         | 1          | 11          | tags=60%, list=4%, signal=61%    |
| <a href="#">MIR670_5P</a>                                                   | 6    | 0.58 | 1.68 | 0.032     | 0.608     | 0.994      | 120         | tags=100%, list=43%, signal=172% |
| MIR506_3P                                                                   | 17   | 0.32 | 1.61 | 0.032     | 0.611     | 0.999      | 166         | tags=94%, list=59%, signal=218%  |
| CACTGCC_MIR34A_MIR34C_MIR449                                                | 8    | 0.48 | 1.63 | 0.035     | 0.581     | 0.998      | 147         | tags=100%, list=53%, signal=205% |
| <a href="#">DR4_Q2</a>                                                      | 6    | 0.56 | 1.67 | 0.036     | 0.591     | 0.997      | 126         | tags=100%, list=45%, signal=178% |
| <a href="#">BERTUCCI_MEDULLARY_VS_DUCTAL_BREAST_CANCER_DN</a>               | 7    | 0.52 | 1.65 | 0.038     | 1         | 1          | 57          | tags=71%, list=20%, signal=88%   |
| MEF2C_TARGET_GENES                                                          | 11   | 0.41 | 1.59 | 0.038     | 0.596     | 0.999      | 169         | tags=100%, list=61%, signal=244% |
| ZBTB12_TARGET_GENES                                                         | 17   | 0.31 | 1.55 | 0.038     | 0.632     | 1          | 140         | tags=88%, list=50%, signal=166%  |
| STAT4_01                                                                    | 8    | 0.47 | 1.58 | 0.039     | 0.602     | 0.999      | 17          | tags=50%, list=6%, signal=52%    |

|                                                               |    |      |      |       |       |       |     |                                  |
|---------------------------------------------------------------|----|------|------|-------|-------|-------|-----|----------------------------------|
| <a href="#">HAHTOLA_MYCOSIS_FUNGOIDES_SKIN_UP</a>             | 5  | 0.62 | 1.63 | 0.043 | 1     | 1     | 109 | tags=100%, list=39%, signal=161% |
| <a href="#">ZWANG_CLASS_1_TRANSIENTLY_INDUCED_BY_EGF</a>      | 23 | 0.24 | 1.48 | 0.045 | 0.857 | 1     | 217 | tags=100%, list=78%, signal=413% |
| <a href="#">RTAAACA_FREAC2_01</a>                             | 16 | 0.32 | 1.54 | 0.045 | 0.622 | 1     | 13  | tags=31%, list=5%, signal=31%    |
| <a href="#">VANTVEER_BREAST_CANCER_ESR1_UP</a>                | 7  | 0.52 | 1.58 | 0.047 | 0.74  | 1     | 59  | tags=71%, list=21%, signal=88%   |
| <a href="#">VDR_Q3</a>                                        | 6  | 0.53 | 1.55 | 0.047 | 0.642 | 1     | 134 | tags=100%, list=48%, signal=188% |
| <a href="#">REACTOME_METABOLISM_OF_VITAMINS_AND_COFACTORS</a> | 8  | 0.47 | 1.59 | 0.048 | 0.89  | 1     | 92  | tags=88%, list=33%, signal=127%  |
| <a href="#">SNIP1_TARGET_GENES</a>                            | 10 | 0.43 | 1.67 | 0.048 | 0.564 | 0.997 | 161 | tags=100%, list=58%, signal=228% |

Supplementary Table 16B: Downregulated Gene Set Enrichment Analysis for significant genes between iAs+ and iAs- with nominal p-value < 0.05.

| GS                                                                  | Size | ES    | NES   | NOM p-val | FDR q-val | FWER p-val | Rank at Max | Leading Edge                     |
|---------------------------------------------------------------------|------|-------|-------|-----------|-----------|------------|-------------|----------------------------------|
| <a href="#">HARRIS_HYPOXIA</a>                                      | 7    | -0.89 | -2.19 | 0         | 0.009     | 0.009      | 23          | tags=86%, list=8%, signal=91%    |
| <a href="#">GAURNIER_PSMD4_TARGETS</a>                              | 9    | -0.81 | -2.13 | 0         | 0.014     | 0.028      | 45          | tags=89%, list=16%, signal=103%  |
| <a href="#">WP_NETWORK_MAP_OF_SARSCOV2_SIGNALING_PATHWAY</a>        | 17   | -0.65 | -2.03 | 0         | 0.034     | 0.131      | 76          | tags=71%, list=27%, signal=91%   |
| <a href="#">REACTOME_INTERLEUKIN_4_AND_INTERLEUKIN_13_SIGNALING</a> | 10   | -0.73 | -2    | 0         | 0.042     | 0.193      | 17          | tags=50%, list=6%, signal=51%    |
| <a href="#">HAN_JNK_SIGNALING_DN</a>                                | 5    | -0.91 | -1.96 | 0         | 0.049     | 0.329      | 16          | tags=80%, list=6%, signal=83%    |
| <a href="#">JINESH_BLEBBISHIELD_VS_LIVE_CONTROL_DN</a>              | 25   | -0.58 | -1.95 | 0         | 0.05      | 0.371      | 56          | tags=48%, list=20%, signal=55%   |
| <a href="#">SENESE_HDAC1_AND_HDAC2_TARGETS_UP</a>                   | 16   | -0.64 | -1.93 | 0         | 0.054     | 0.472      | 29          | tags=44%, list=10%, signal=46%   |
| <a href="#">REACTOME_G_ALPHA_1_SIGNALING_EVENTS</a>                 | 10   | -0.7  | -1.91 | 0         | 0.062     | 0.601      | 15          | tags=50%, list=5%, signal=51%    |
| <a href="#">SMID_BREAST_CANCER_LUMINAL_B_DN</a>                     | 31   | -0.53 | -1.9  | 0         | 0.049     | 0.625      | 38          | tags=39%, list=14%, signal=40%   |
| <a href="#">BIOCARTA_INFLAM_PATHWAY</a>                             | 5    | -0.86 | -1.88 | 0         | 0.047     | 0.733      | 44          | tags=100%, list=16%, signal=117% |
| <a href="#">WP_CYTOKINES_AND_INFLAMMATORY_RESPONSE</a>              | 5    | -0.86 | -1.87 | 0         | 0.047     | 0.767      | 44          | tags=100%, list=16%, signal=117% |
| <a href="#">SMID_BREAST_CANCER_NORMAL_LIKE_UP</a>                   | 12   | -0.75 | -2.13 | 0.001     | 0.009     | 0.028      | 30          | tags=67%, list=11%, signal=71%   |
| <a href="#">JINESH_BLEBBISHIELD_TO_IMMUNE_CELL_FUSION_PBSHMS_DN</a> | 27   | -0.57 | -1.97 | 0.001     | 0.055     | 0.288      | 54          | tags=48%, list=19%, signal=54%   |
| <a href="#">KEGG_CYTOKINE_CYTOKINE_RECEPTOR_INTERACTION</a>         | 10   | -0.72 | -1.97 | 0.001     | 0.048     | 0.293      | 66          | tags=80%, list=24%, signal=101%  |
| <a href="#">NABA_MATRISOME_ASSOCIATED</a>                           | 26   | -0.56 | -1.91 | 0.001     | 0.068     | 0.58       | 86          | tags=65%, list=31%, signal=86%   |
| <a href="#">REACTOME_PEPTIDE_LIGAND_BINDING_RECEPTORS</a>           | 11   | -0.66 | -1.9  | 0.001     | 0.056     | 0.615      | 15          | tags=45%, list=5%, signal=46%    |
| <a href="#">REACTOME_CLASS_A_1_RHODOPSIN_LIKE_RECEPTORS</a>         | 13   | -0.64 | -1.9  | 0.001     | 0.051     | 0.62       | 70          | tags=69%, list=25%, signal=88%   |
| <a href="#">REACTOME_MHC_CLASS_II_ANTIGEN_PRESENTATION</a>          | 6    | -0.81 | -1.89 | 0.001     | 0.048     | 0.671      | 45          | tags=83%, list=16%, signal=97%   |

|                                                                        |    |       |       |       |       |       |    |                                        |
|------------------------------------------------------------------------|----|-------|-------|-------|-------|-------|----|----------------------------------------|
| IWANAGA_CARCIINOGENESIS_BY_KRAS_PTEN_UP                                | 5  | -0.85 | -1.88 | 0.001 | 0.046 | 0.736 | 23 | tags=80%,<br>list=8%,<br>signal=86%    |
| BOQUEST_STEM_CELL_DN                                                   | 10 | -0.68 | -1.86 | 0.001 | 0.055 | 0.836 | 45 | tags=60%,<br>list=16%,<br>signal=69%   |
| WP_SARSCOV2_INNATE_IMMUNITY_EVASION_AND_CELLSPECIFIC_IMMUNE_RESPONSE   | 6  | -0.78 | -1.85 | 0.001 | 0.052 | 0.849 | 66 | tags=100%,<br>list=24%,<br>signal=128% |
| <a href="#">LIANG_SILENCED_BY_METHYLATION_2</a>                        | 11 | -0.68 | -1.93 | 0.002 | 0.06  | 0.47  | 13 | tags=45%,<br>list=5%,<br>signal=46%    |
| <a href="#">REACTOME_ADAPTIVE_IMMUNE_SYSTEM</a>                        | 15 | -0.62 | -1.91 | 0.002 | 0.064 | 0.585 | 45 | tags=47%,<br>list=16%,<br>signal=53%   |
| <a href="#">ONDER_CDHI_TARGETS_3_DN</a>                                | 10 | -0.69 | -1.9  | 0.002 | 0.048 | 0.639 | 66 | tags=80%,<br>list=24%,<br>signal=101%  |
| BLANCO_MELO_COVID19_BRONCHIAL_EPITHELIAL_CELLS_SARS_COV_2_INFECTION_UP | 18 | -0.6  | -1.89 | 0.002 | 0.048 | 0.659 | 69 | tags=61%,<br>list=25%,<br>signal=76%   |
| REACTOME_GPCR_LIGAND_BINDING                                           | 15 | -0.63 | -1.89 | 0.002 | 0.048 | 0.693 | 88 | tags=80%,<br>list=32%,<br>signal=111%  |
| HSIAO_LIVER_SPECIFIC_GENES                                             | 9  | -0.7  | -1.88 | 0.002 | 0.048 | 0.702 | 20 | tags=44%,<br>list=7%,<br>signal=46%    |
| NABA_SECRETED_FACTORS                                                  | 13 | -0.62 | -1.87 | 0.002 | 0.048 | 0.76  | 86 | tags=77%,<br>list=31%,<br>signal=106%  |
| DAZARD_RESPONSE_TO_UV_NHEK_UP                                          | 12 | -0.65 | -1.86 | 0.002 | 0.054 | 0.838 | 76 | tags=75%,<br>list=27%,<br>signal=99%   |
| <a href="#">BOSCO_EPITHELIAL_DIFFERENTIATION_MODULE</a>                | 8  | -0.73 | -1.9  | 0.003 | 0.058 | 0.601 | 33 | tags=63%,<br>list=12%,<br>signal=69%   |
| <a href="#">WP_ALLOGRAFT_REJECTION</a>                                 | 5  | -0.86 | -1.9  | 0.003 | 0.054 | 0.62  | 45 | tags=100%,<br>list=16%,<br>signal=117% |
| WP_OVERVIEW_OF_PROINFLAMMATORY_AND_PROFIBROTIC_MEDIATORS               | 8  | -0.74 | -1.88 | 0.003 | 0.049 | 0.73  | 44 | tags=75%,<br>list=16%,<br>signal=86%   |
| KIM_GLI2_TARGETS_UP                                                    | 7  | -0.75 | -1.84 | 0.003 | 0.058 | 0.893 | 45 | tags=71%,<br>list=16%,<br>signal=83%   |
| BOYLAN_MULTIPLE_MYELOMA_PCA1_UP                                        | 6  | -0.77 | -1.82 | 0.003 | 0.067 | 0.928 | 8  | tags=50%,<br>list=3%,<br>signal=50%    |
| WP_MIRNAS_INVOLVEMENT_IN_THE_IMMUNE_RESPONSE_IN_SEPSIS                 | 6  | -0.77 | -1.82 | 0.003 | 0.067 | 0.93  | 15 | tags=50%,<br>list=5%,<br>signal=52%    |
| ALCALAY_AML_BY_NPM1_LOCALIZATION_DN                                    | 6  | -0.77 | -1.82 | 0.003 | 0.069 | 0.946 | 49 | tags=83%,<br>list=18%,<br>signal=99%   |
| REACTOME_CYTOKINE_SIGNALING_IN_IMMUNE_SYSTEM                           | 31 | -0.51 | -1.82 | 0.003 | 0.068 | 0.946 | 63 | tags=45%,<br>list=23%,<br>signal=52%   |
| BLANCO_MELO_COVID19_SARS_COV_2_INFECTION_A594_ACE2_EXPRESSING_CELLS_UP | 14 | -0.6  | -1.8  | 0.003 | 0.077 | 0.969 | 38 | tags=50%,<br>list=14%,<br>signal=55%   |
| NAKAMURA_TUMOR_ZONE_PERIPHERAL_VS_CENTRAL_DN                           | 22 | -0.53 | -1.78 | 0.003 | 0.087 | 0.991 | 31 | tags=32%,<br>list=11%,<br>signal=33%   |
| WP_OVERVIEW_OF_NANOPARTICLE_EFFECTS                                    | 5  | -0.79 | -1.73 | 0.003 | 0.117 | 1     | 17 | tags=60%,<br>list=6%,<br>signal=63%    |
| KRIEG_HYPOXIA_VIA_KDM3A                                                | 7  | -0.7  | -1.73 | 0.003 | 0.119 | 1     | 49 | tags=71%,<br>list=18%,<br>signal=84%   |
| THUM_SYSTOLIC_HEART_FAILURE_UP                                         | 17 | -0.59 | -1.85 | 0.004 | 0.053 | 0.843 | 28 | tags=41%,<br>list=10%,<br>signal=43%   |
| NABA_MATRISOME                                                         | 36 | -0.49 | -1.79 | 0.004 | 0.085 | 0.985 | 86 | tags=56%,<br>list=31%,<br>signal=70%   |
| KEGG_LEISHMANIA_INFECTION                                              | 6  | -0.75 | -1.77 | 0.004 | 0.096 | 0.994 | 45 | tags=67%,<br>list=16%,<br>signal=78%   |

|                                                                                                                                              |    |       |       |       |       |       |     |                                        |
|----------------------------------------------------------------------------------------------------------------------------------------------|----|-------|-------|-------|-------|-------|-----|----------------------------------------|
| REACTOME_INNATE_IMMUNE_SYSTEM                                                                                                                | 35 | -0.48 | -1.75 | 0.004 | 0.108 | 0.999 | 38  | tags=31%,<br>list=14%,<br>signal=32%   |
| MCLACHLAN_DENTAL_CARIES_UP                                                                                                                   | 25 | -0.5  | -1.73 | 0.004 | 0.118 | 1     | 22  | tags=32%,<br>list=8%,<br>signal=32%    |
| WINZEN_DEGRADED_VIA_KHSRP                                                                                                                    | 10 | -0.64 | -1.75 | 0.005 | 0.109 | 0.999 | 66  | tags=70%,<br>list=24%,<br>signal=88%   |
| <a href="#">ZSCAN2_TARGET_GENES</a>                                                                                                          | 7  | -0.72 | -1.76 | 0.005 | 1     | 0.978 | 20  | tags=43%,<br>list=7%,<br>signal=45%    |
| <a href="#">MIR338_5P</a>                                                                                                                    | 7  | -0.69 | -1.7  | 0.005 | 1     | 1     | 13  | tags=43%,<br>list=5%,<br>signal=44%    |
| LIN_SILENCED_BY_TUMOR_MICROENVIRONME<br>NT                                                                                                   | 10 | -0.66 | -1.83 | 0.006 | 0.063 | 0.912 | 71  | tags=80%,<br>list=25%,<br>signal=103%  |
| BLANCO_MELO_RESPIRATORY_SYNCYTIAL_VI<br>RUS_INFECTION_A594_CELLS_UP                                                                          | 25 | -0.52 | -1.79 | 0.006 | 0.084 | 0.984 | 48  | tags=44%,<br>list=17%,<br>signal=48%   |
| BLANCO_MELO_COVID19_SARS_COV_2_POS_PA<br>TIENT_LUNG_TISSUE_UP                                                                                | 5  | -0.8  | -1.79 | 0.006 | 0.084 | 0.986 | 60  | tags=100%,<br>list=22%,<br>signal=125% |
| REACTOME_INTERLEUKIN_10_SIGNALING                                                                                                            | 8  | -0.69 | -1.76 | 0.006 | 0.106 | 0.999 | 63  | tags=75%,<br>list=23%,<br>signal=94%   |
| SCHUETZ_BREAST_CANCER_DUCTAL_INVASIV<br>E_UP                                                                                                 | 23 | -0.53 | -1.75 | 0.006 | 0.106 | 0.999 | 87  | tags=65%,<br>list=31%,<br>signal=87%   |
| KEGG_SYSTEMIC_LUPUS_ERYTHEMATOSUS                                                                                                            | 5  | -0.8  | -1.75 | 0.006 | 0.108 | 0.999 | 45  | tags=80%,<br>list=16%,<br>signal=94%   |
| VECCHI_GASTRIC_CANCER_EARLY_UP                                                                                                               | 21 | -0.53 | -1.72 | 0.006 | 0.125 | 1     | 71  | tags=57%,<br>list=25%,<br>signal=71%   |
| RIZKI_TUMOR_INVASIVENESS_3D_UP                                                                                                               | 5  | -0.75 | -1.64 | 0.006 | 0.179 | 1     | 49  | tags=80%,<br>list=18%,<br>signal=95%   |
| REACTOME_REGULATION_OF_INSULIN_LIKE_G<br>ROWTH_FACTOR_IGF_TRANSPORT_AND_UPTA<br>KE_BY_INSULIN_LIKE_GROWTH_FACTOR_BIND<br>ING_PROTEINS_IGFBPS | 10 | -0.64 | -1.76 | 0.007 | 0.108 | 0.999 | 75  | tags=70%,<br>list=27%,<br>signal=92%   |
| HALMOS_CEBPA_TARGETS_UP                                                                                                                      | 5  | -0.78 | -1.73 | 0.007 | 0.118 | 1     | 66  | tags=100%,<br>list=24%,<br>signal=129% |
| WP_COMPLEMENT_AND_COAGULATION_CASC<br>ADES                                                                                                   | 5  | -0.77 | -1.69 | 0.007 | 0.146 | 1     | 23  | tags=60%,<br>list=8%,<br>signal=64%    |
| ONDER_CDH1_SIGNALING_VIA_CTNNB1                                                                                                              | 10 | -0.62 | -1.69 | 0.007 | 0.149 | 1     | 38  | tags=50%,<br>list=14%,<br>signal=56%   |
| ZHENG_GLIOBLASTOMA_PLASTICITY_UP                                                                                                             | 14 | -0.61 | -1.81 | 0.008 | 0.071 | 0.957 | 119 | tags=100%,<br>list=43%,<br>signal=166% |
| ONDER_CDH1_TARGETS_2_DN                                                                                                                      | 41 | -0.46 | -1.73 | 0.008 | 0.119 | 1     | 68  | tags=44%,<br>list=24%,<br>signal=50%   |
| SMIRNOV_CIRCULATING_ENDOTHELIOCYTES_I<br>N_CANCER_UP                                                                                         | 11 | -0.59 | -1.67 | 0.008 | 0.159 | 1     | 17  | tags=36%,<br>list=6%,<br>signal=37%    |
| <a href="#">HALLMARK_IL6_JAK_STAT3_SIGNALING</a>                                                                                             | 10 | -0.63 | -1.73 | 0.008 | 0.232 | 0.201 | 69  | tags=70%,<br>list=25%,<br>signal=90%   |
| REACTOME_SIGNALING_BY_GPCR                                                                                                                   | 20 | -0.54 | -1.77 | 0.009 | 0.094 | 0.992 | 88  | tags=65%,<br>list=32%,<br>signal=88%   |
| POOLA_INVASIVE_BREAST_CANCER_UP                                                                                                              | 15 | -0.56 | -1.7  | 0.009 | 0.135 | 1     | 57  | tags=53%,<br>list=20%,<br>signal=63%   |
| LY_AGING_OLD_DN                                                                                                                              | 5  | -0.75 | -1.67 | 0.009 | 0.16  | 1     | 49  | tags=80%,<br>list=18%,<br>signal=95%   |
| ONDER_CDH1_TARGETS_1_DN                                                                                                                      | 13 | -0.6  | -1.74 | 0.01  | 0.114 | 1     | 91  | tags=77%,<br>list=33%,<br>signal=109%  |

|                                                                       |    |       |       |       |       |       |    |                                        |
|-----------------------------------------------------------------------|----|-------|-------|-------|-------|-------|----|----------------------------------------|
| KEGG_HEMATOPOIETIC_CELL_LINEAGE                                       | 8  | -0.65 | -1.67 | 0.01  | 0.164 | 1     | 69 | tags=75%,<br>list=25%,<br>signal=97%   |
| TENEDINI_MEGAKARYOCYTE_MARKERS                                        | 7  | -0.71 | -1.72 | 0.011 | 0.122 | 1     | 69 | tags=86%,<br>list=25%,<br>signal=111%  |
| CREIGHTON_ENDOCRINE_THERAPY_RESISTANCE_3                              | 32 | -0.48 | -1.7  | 0.011 | 0.133 | 1     | 33 | tags=31%,<br>list=12%,<br>signal=31%   |
| REACTOME_SIGNALING_BY_INTERLEUKINS                                    | 22 | -0.52 | -1.7  | 0.011 | 0.131 | 1     | 63 | tags=45%,<br>list=23%,<br>signal=54%   |
| FOROUTAN_INTEGRATED_TGFB_EMT_UP                                       | 5  | -0.74 | -1.63 | 0.011 | 0.18  | 1     | 77 | tags=100%,<br>list=28%,<br>signal=136% |
| <a href="#">MIR6721_5P</a>                                            | 6  | -0.71 | -1.69 | 0.011 | 1     | 1     | 45 | tags=67%,<br>list=16%,<br>signal=78%   |
| <a href="#">MIR5579_3P</a>                                            | 5  | -0.77 | -1.67 | 0.011 | 1     | 1     | 28 | tags=60%,<br>list=10%,<br>signal=65%   |
| <a href="#">HES2_TARGET_GENES</a>                                     | 36 | -0.45 | -1.65 | 0.011 | 1     | 1     | 20 | tags=22%,<br>list=7%,<br>signal=21%    |
| REACTOME_CHEMOKINE_RECEPTORS_BIND_CHEMOKINES                          | 5  | -0.78 | -1.73 | 0.012 | 0.118 | 1     | 66 | tags=100%,<br>list=24%,<br>signal=129% |
| COLINA_TARGETS_OF_4EBP1_AND_4EBP2                                     | 17 | -0.54 | -1.71 | 0.013 | 0.134 | 1     | 51 | tags=47%,<br>list=18%,<br>signal=54%   |
| PROVENZANI_METASTASIS_DN                                              | 9  | -0.63 | -1.67 | 0.013 | 0.166 | 1     | 30 | tags=44%,<br>list=11%,<br>signal=48%   |
| WP_ANTIVIRAL_AND_ANTIINFLAMMATORY_EFFECTS_OF_NRF2_ON_SARSCOV2_PATHWAY | 6  | -0.69 | -1.63 | 0.014 | 0.182 | 1     | 17 | tags=50%,<br>list=6%,<br>signal=52%    |
| YAN_ESCAPE_FROM_ANOIKIS                                               | 5  | -0.75 | -1.66 | 0.015 | 0.165 | 1     | 48 | tags=80%,<br>list=17%,<br>signal=95%   |
| ICHIBA_GRAFT_VERSUS_HOST_DISEASE_35D_UP                               | 8  | -0.65 | -1.65 | 0.015 | 0.179 | 1     | 87 | tags=88%,<br>list=31%,<br>signal=124%  |
| BOYLAN_MULTIPLE_MYELOMA_C_D_DN                                        | 13 | -0.54 | -1.65 | 0.015 | 0.179 | 1     | 36 | tags=38%,<br>list=13%,<br>signal=42%   |
| LEE_LIVER_CANCER_E2F1_UP                                              | 5  | -0.74 | -1.62 | 0.015 | 0.192 | 1     | 61 | tags=80%,<br>list=22%,<br>signal=101%  |
| FOSTER_KDM1A_TARGETS_UP                                               | 6  | -0.69 | -1.65 | 0.016 | 0.179 | 1     | 48 | tags=67%,<br>list=17%,<br>signal=79%   |
| LIU_VAV3_PROSTATE_CARCINOGENESIS_UP                                   | 6  | -0.7  | -1.63 | 0.016 | 0.184 | 1     | 16 | tags=50%,<br>list=6%,<br>signal=52%    |
| BOQUEST_STEM_CELL_UP                                                  | 7  | -0.67 | -1.62 | 0.016 | 0.198 | 1     | 32 | tags=57%,<br>list=11%,<br>signal=63%   |
| SENESE_HDAC2_TARGETS_UP                                               | 7  | -0.7  | -1.72 | 0.017 | 0.125 | 1     | 15 | tags=43%,<br>list=5%,<br>signal=44%    |
| WP_IL18_SIGNALING_PATHWAY                                             | 16 | -0.54 | -1.66 | 0.017 | 0.166 | 1     | 17 | tags=31%,<br>list=6%,<br>signal=31%    |
| KEGG_CELL_ADHESION_MOLECULES_CAMS                                     | 7  | -0.64 | -1.6  | 0.017 | 0.21  | 1     | 45 | tags=57%,<br>list=16%,<br>signal=66%   |
| DAZARD_RESPONSE_TO_UV_SCC_UP                                          | 7  | -0.68 | -1.67 | 0.018 | 0.161 | 1     | 66 | tags=71%,<br>list=24%,<br>signal=91%   |
| TONKS_TARGETS_OF_RUNX1_RUNX1T1_FUSION_HSC_UP                          | 11 | -0.59 | -1.65 | 0.018 | 0.181 | 1     | 65 | tags=64%,<br>list=23%,<br>signal=80%   |
| REACTOME_C_TYPE_LECTIN_RECEPTORS_CLRS                                 | 6  | -0.7  | -1.62 | 0.018 | 0.197 | 1     | 27 | tags=50%,<br>list=10%,<br>signal=54%   |
| <a href="#">HALLMARK_COMPLEMENT</a>                                   | 15 | -0.56 | -1.72 | 0.018 | 0.129 | 0.222 | 38 | tags=40%,<br>list=14%,<br>signal=44%   |



|                                                                       |    |       |       |       |       |       |    |                                        |
|-----------------------------------------------------------------------|----|-------|-------|-------|-------|-------|----|----------------------------------------|
| REACTOME_CELL_SURFACE_INTERACTIONS_A<br>T_THE_VASCULAR_WALL           | 10 | -0.61 | -1.69 | 0.019 | 0.145 | 1     | 69 | tags=70%,<br>list=25%,<br>signal=90%   |
| SABATES_COLORECTAL_ADENOMA_UP                                         | 15 | -0.55 | -1.67 | 0.02  | 0.167 | 1     | 66 | tags=53%,<br>list=24%,<br>signal=66%   |
| GAUSSMANN_MLL_AF4_FUSION_TARGETS_G_U<br>P                             | 11 | -0.59 | -1.64 | 0.02  | 0.18  | 1     | 97 | tags=82%,<br>list=35%,<br>signal=120%  |
| LI_AMPLIFIED_IN_LUNG_CANCER                                           | 11 | -0.57 | -1.62 | 0.02  | 0.191 | 1     | 33 | tags=36%,<br>list=12%,<br>signal=40%   |
| GROSS_HYPOXIA_VIA_ELK3_ONLY_UP                                        | 5  | -0.73 | -1.6  | 0.02  | 0.21  | 1     | 81 | tags=100%,<br>list=29%,<br>signal=138% |
| DUTERTRE ESTRADIOL_RESPONSE_24HR_UP                                   | 9  | -0.6  | -1.59 | 0.02  | 0.215 | 1     | 68 | tags=67%,<br>list=24%,<br>signal=85%   |
| <a href="#">HALLMARK_ALLOGRAFT_REJECTION</a>                          | 10 | -0.61 | -1.69 | 0.02  | 0.109 | 0.273 | 45 | tags=50%,<br>list=16%,<br>signal=57%   |
| <a href="#">HALLMARK_INTERFERON_GAMMA_RESPONSE</a>                    | 13 | -0.55 | -1.64 | 0.021 | 0.122 | 0.384 | 48 | tags=46%,<br>list=17%,<br>signal=53%   |
| HINATA_NFKB_TARGETS_FIBROBLAST_UP                                     | 11 | -0.59 | -1.63 | 0.022 | 0.184 | 1     | 38 | tags=45%,<br>list=14%,<br>signal=51%   |
| MARKEY_RB1_CHRONIC_LOF_DN                                             | 8  | -0.63 | -1.65 | 0.023 | 0.177 | 1     | 17 | tags=38%,<br>list=6%,<br>signal=39%    |
| ICHIBA_GRAFT_VERSUS_HOST_DISEASE_D7_UP                                | 8  | -0.63 | -1.6  | 0.024 | 0.211 | 1     | 45 | tags=50%,<br>list=16%,<br>signal=58%   |
| SENGUPTA_NASOPHARYNGEAL_CARCINOMA_<br>WITH_LMP1_DN                    | 12 | -0.58 | -1.64 | 0.025 | 0.179 | 1     | 36 | tags=50%,<br>list=13%,<br>signal=55%   |
| GRAESSMANN_APOPTOSIS_BY_SERUM_DEPRIV<br>ATION_DN                      | 10 | -0.59 | -1.59 | 0.025 | 0.219 | 1     | 23 | tags=40%,<br>list=8%,<br>signal=42%    |
| TAKEDA_TARGETS_OF_NUP98_HOXA9_FUSION<br>_8D_UP                        | 9  | -0.61 | -1.64 | 0.026 | 0.177 | 1     | 82 | tags=78%,<br>list=29%,<br>signal=107%  |
| SATO_SILENCED_BY_METHYLATION_IN_PANC<br>REATIC_CANCER_I               | 23 | -0.49 | -1.64 | 0.026 | 0.176 | 1     | 63 | tags=48%,<br>list=23%,<br>signal=57%   |
| VERHAAK_AML_WITH_NPM1_MUTATED_UP                                      | 16 | -0.52 | -1.6  | 0.026 | 0.21  | 1     | 20 | tags=31%,<br>list=7%,<br>signal=32%    |
| GRAHAM_CML_QUIESCENT_VS_CML_DIVIDING<br>UP                            | 5  | -0.69 | -1.57 | 0.026 | 0.235 | 1     | 66 | tags=80%,<br>list=24%,<br>signal=103%  |
| SENGUPTA_NASOPHARYNGEAL_CARCINOMA_<br>WITH_LMP1_UP                    | 9  | -0.59 | -1.56 | 0.026 | 0.252 | 1     | 62 | tags=56%,<br>list=22%,<br>signal=69%   |
| LENAOUR_DENDRITIC_CELL_MATURATION_DN                                  | 9  | -0.61 | -1.6  | 0.027 | 0.208 | 1     | 15 | tags=33%,<br>list=5%,<br>signal=34%    |
| MARTENS_TRETINOIN_RESPONSE_DN                                         | 12 | -0.56 | -1.59 | 0.027 | 0.214 | 1     | 49 | tags=50%,<br>list=18%,<br>signal=58%   |
| FOROUTAN_INTEGRATED_TGFB_EMT_DN                                       | 10 | -0.59 | -1.59 | 0.027 | 0.213 | 1     | 47 | tags=50%,<br>list=17%,<br>signal=58%   |
| BLANCO_MELO_BETA_INTERFERON_TREATED_<br>BRONCHIAL_EPITHELIAL_CELLS_UP | 28 | -0.45 | -1.55 | 0.027 | 0.257 | 1     | 77 | tags=46%,<br>list=28%,<br>signal=58%   |
| <a href="#">MIR545_3P</a>                                             | 6  | -0.67 | -1.56 | 0.028 | 1     | 1     | 76 | tags=83%,<br>list=27%,<br>signal=112%  |
| KEGG_CHEMOKINE_SIGNALING_PATHWAY                                      | 7  | -0.66 | -1.61 | 0.029 | 0.202 | 1     | 38 | tags=57%,<br>list=14%,<br>signal=64%   |
| ALTEMEIER_RESPONSE_TO_LPS_WITH_MECHA<br>NICAL_VENTILATION             | 13 | -0.54 | -1.58 | 0.029 | 0.22  | 1     | 77 | tags=62%,<br>list=28%,<br>signal=81%   |
| FOROUTAN_TGFB_EMT_DN                                                  | 12 | -0.54 | -1.57 | 0.029 | 0.239 | 1     | 58 | tags=50%,<br>list=21%,<br>signal=60%   |

|                                                            |    |       |       |       |       |       |     |                                       |
|------------------------------------------------------------|----|-------|-------|-------|-------|-------|-----|---------------------------------------|
| BLANCO_MELO_COVID19_SARS_COV_2_INFECT<br>ION_A594_CELLS_UP | 8  | -0.63 | -1.62 | 0.03  | 0.193 | 1     | 27  | tags=50%,<br>list=10%,<br>signal=54%  |
| WINTER_HYPOXIA_METAGENE                                    | 19 | -0.5  | -1.61 | 0.03  | 0.202 | 1     | 23  | tags=32%,<br>list=8%,<br>signal=32%   |
| HINATA_NFKB_TARGETS_KERATINOCYTE_UP                        | 13 | -0.55 | -1.62 | 0.031 | 0.19  | 1     | 15  | tags=31%,<br>list=5%,<br>signal=31%   |
| <a href="#">IK1_01</a>                                     | 5  | -0.72 | -1.57 | 0.031 | 1     | 1     | 13  | tags=40%,<br>list=5%,<br>signal=41%   |
| LINDSTEDT_DENDRITIC_CELL_MATURATION_A                      | 9  | -0.59 | -1.56 | 0.032 | 0.25  | 1     | 62  | tags=56%,<br>list=22%,<br>signal=69%  |
| LEE_LIVER_CANCER_CIPROFIBRATE_UP                           | 5  | -0.7  | -1.53 | 0.032 | 0.304 | 1     | 61  | tags=80%,<br>list=22%,<br>signal=101% |
| <a href="#">DLX2_TARGET_GENES</a>                          | 6  | -0.67 | -1.56 | 0.032 | 1     | 1     | 31  | tags=50%,<br>list=11%,<br>signal=55%  |
| MAHAJAN_RESPONSE_TO_IL1A_UP                                | 8  | -0.62 | -1.59 | 0.033 | 0.214 | 1     | 94  | tags=88%,<br>list=34%,<br>signal=128% |
| MORI_MATURE_B_LYMPHOCYTE_UP                                | 5  | -0.68 | -1.5  | 0.034 | 0.332 | 1     | 45  | tags=60%,<br>list=16%,<br>signal=70%  |
| <a href="#">HALLMARK_HYPOXIA</a>                           | 13 | -0.56 | -1.62 | 0.035 | 0.12  | 0.444 | 23  | tags=38%,<br>list=8%,<br>signal=40%   |
| GRAESSMANN_RESPONSE_TO_MC_AND_SERU<br>M_DEPRIVATION_UP     | 13 | -0.55 | -1.61 | 0.036 | 0.201 | 1     | 52  | tags=46%,<br>list=19%,<br>signal=54%  |
| TIAN_TNF_SIGNALING_VIA_NFKB                                | 8  | -0.62 | -1.57 | 0.037 | 0.24  | 1     | 38  | tags=50%,<br>list=14%,<br>signal=56%  |
| <a href="#">MIR3119</a>                                    | 8  | -0.6  | -1.55 | 0.037 | 1     | 1     | 101 | tags=88%,<br>list=36%,<br>signal=133% |
| IGLESIAS_E2F_TARGETS_UP                                    | 7  | -0.63 | -1.56 | 0.038 | 0.254 | 1     | 25  | tags=43%,<br>list=9%,<br>signal=46%   |
| <a href="#">GGGNNTTCC_NFKB_Q6_01</a>                       | 5  | -0.69 | -1.53 | 0.039 | 1     | 1     | 16  | tags=40%,<br>list=6%,<br>signal=42%   |
| WP_HEPATITIS_B_INFECTION                                   | 5  | -0.68 | -1.49 | 0.04  | 0.33  | 1     | 15  | tags=40%,<br>list=5%,<br>signal=42%   |
| <a href="#">HALLMARK_COAGULATION</a>                       | 13 | -0.53 | -1.55 | 0.04  | 0.162 | 0.615 | 109 | tags=77%,<br>list=39%,<br>signal=120% |
| MCBRYAN_PUBERTAL_BREAST_4_5WK_UP                           | 20 | -0.48 | -1.59 | 0.041 | 0.213 | 1     | 81  | tags=55%,<br>list=29%,<br>signal=72%  |
| GERY_CEBP_TARGETS                                          | 9  | -0.6  | -1.56 | 0.041 | 0.253 | 1     | 17  | tags=33%,<br>list=6%,<br>signal=34%   |
| <a href="#">NR1H4_TARGET_GENES</a>                         | 11 | -0.56 | -1.55 | 0.041 | 1     | 1     | 20  | tags=27%,<br>list=7%,<br>signal=28%   |
| ZWANG_TRANSIENTLY_UP_BY_2ND_EGF_PULS<br>E_ONLY             | 25 | -0.45 | -1.52 | 0.042 | 0.318 | 1     | 114 | tags=68%,<br>list=41%,<br>signal=105% |
| LIEN_BREAST_CARCINOMA_METAPLASTIC_VS<br>_DUCTAL_UP         | 7  | -0.62 | -1.52 | 0.043 | 0.317 | 1     | 17  | tags=43%,<br>list=6%,<br>signal=44%   |
| WP_CHEMOKINE_SIGNALING_PATHWAY                             | 5  | -0.68 | -1.49 | 0.043 | 0.331 | 1     | 6   | tags=40%,<br>list=2%,<br>signal=40%   |
| XU_HGF_SIGNALING_NOT_VIA_AKT1_48HR_UP                      | 5  | -0.68 | -1.47 | 0.043 | 0.348 | 1     | 17  | tags=40%,<br>list=6%,<br>signal=42%   |
| <a href="#">CREL_01</a>                                    | 6  | -0.65 | -1.49 | 0.044 | 1     | 1     | 16  | tags=33%,<br>list=6%,<br>signal=35%   |
| <a href="#">MED25_TARGET_GENES</a>                         | 5  | -0.68 | -1.49 | 0.044 | 1     | 1     | 15  | tags=40%,<br>list=5%,<br>signal=42%   |

|                                                                         |    |       |       |       |       |   |     |                                       |
|-------------------------------------------------------------------------|----|-------|-------|-------|-------|---|-----|---------------------------------------|
| ANDERSEN_CHOLANGIOCARCINOMA_CLASS2                                      | 20 | -0.48 | -1.56 | 0.047 | 0.253 | 1 | 91  | tags=60%,<br>list=33%,<br>signal=83%  |
| GOBERT_OLIGODENDROCYTE_DIFFERENTIATION_UP                               | 11 | -0.55 | -1.54 | 0.047 | 0.278 | 1 | 69  | tags=64%,<br>list=25%,<br>signal=81%  |
| SMID_BREAST_CANCER_BASAL_UP                                             | 43 | -0.41 | -1.5  | 0.047 | 0.329 | 1 | 67  | tags=40%,<br>list=24%,<br>signal=44%  |
| PID_REG_GR_PATHWAY                                                      | 5  | -0.67 | -1.48 | 0.047 | 0.342 | 1 | 15  | tags=40%,<br>list=5%,<br>signal=42%   |
| DELYS_THYROID_CANCER_UP                                                 | 42 | -0.4  | -1.48 | 0.047 | 0.344 | 1 | 129 | tags=67%,<br>list=46%,<br>signal=105% |
| WANG_MLL_TARGETS                                                        | 10 | -0.57 | -1.57 | 0.048 | 0.243 | 1 | 96  | tags=80%,<br>list=34%,<br>signal=118% |
| SENGUPTA_NASOPHARYNGEAL_CARCINOMA_DN                                    | 18 | -0.48 | -1.52 | 0.048 | 0.315 | 1 | 38  | tags=33%,<br>list=14%,<br>signal=36%  |
| SANA_RESPONSE_TO_IFNG_UP                                                | 9  | -0.57 | -1.51 | 0.048 | 0.329 | 1 | 78  | tags=67%,<br>list=28%,<br>signal=90%  |
| MANNE_COVID19_COMBINED_COHORT_VS_HEALTHY_DONOR_PLATELETS_DN             | 5  | -0.67 | -1.5  | 0.048 | 0.333 | 1 | 40  | tags=60%,<br>list=14%,<br>signal=69%  |
| BLANCO_MELO_BRONCHIAL_EPITHELIAL_CELLS_INFLUENZA_A_DEL_NS1_INFECTION_DN | 5  | -0.69 | -1.51 | 0.049 | 0.323 | 1 | 51  | tags=80%,<br>list=18%,<br>signal=96%  |

Supplementary Table 17: Ingenuity Pathway Analysis of Supplementary Table 15.

| © 2000-2022 QIAGEN. All rights reserved.             |               |        |         |                                                                                                                                                                                                                                                                              |
|------------------------------------------------------|---------------|--------|---------|------------------------------------------------------------------------------------------------------------------------------------------------------------------------------------------------------------------------------------------------------------------------------|
| Ingenuity Canonical Pathways                         | -log(p-value) | Ratio  | z-score | Molecules                                                                                                                                                                                                                                                                    |
| Phagosome Maturation                                 | 13.1          | 0.177  | #NUM!   | ATP6V0C,ATP6V0D1,ATP6V0E1,ATP6V1E1,CTSB,CTSE,CTSD,DYNC1H1,DYNLL1,DYNLRB1,HLA-A,HLA-B,HLA-C,HLA-DRA,HLA-DRB1,PRDX1,PRDX2,RAB5A,RAB5C,RAB7A,RAC1,TCIRG1,TUBA1A,TUBA1B,TUBA1C,TUBA4A,TUBB,TUBB4B                                                                                |
| Remodeling of Epithelial Adherens Junctions          | 12.8          | 0.279  | #NUM!   | ACTB,ACTG1,ACTN1,ACTN4,ACTR2,ARPC2,CTNNB1,IQGAP1,MET,RAB5A,RAB5C,RAB7A,TUBA1A,TUBA1B,TUBA1C,TUBA4A,TUBB,TUBB4B,VCL                                                                                                                                                           |
| ILK Signaling                                        | 12.7          | 0.154  | #NUM!   | ACTB,ACTG1,ACTN1,ACTN4,ATF2,CCND1,CDC42,CFL1,CREB3,CREB5,CREBBP,CTNNB1,FLNA,HIF1A,ITGB1,ITGB3,ITGB4,ITGB8,KRT18,MUC1,MYH9,MYL6,PPP2R2A,RAC1,RELA,RHOB,RHOC,RHOF,TMSB10,TMSB4X,VCL,VIM                                                                                        |
| Hepatic Fibrosis Signaling Pathway                   | 10.9          | 0.102  | #NUM!   | ATF2,CALM1 (includes others),CCND1,CDC42,CREB3,CREB5,CREBBP,CSNK1D,CTNNB1,CXCL8,FTL,FZD6,GNAI1,GNAI2,HIF1A,ICAM1,IL18,IL1R1,ITGA3,ITGAV,ITGB1,ITGB3,ITGB4,ITGB8,JAK1,LRP6,MYD88,MYL12A,MYL12B,MYL6,NFKBIA,PRKAG2,PRKCI,RAC1,RELA,RHOB,RHOC,RHOF,SOX2,SPP1,TGFBF2,TIMP1,WNT7A |
| RHO GDI Signaling                                    | 10.9          | 0.136  | #NUM!   | ACTB,ACTG1,ACTR2,ARHGAP1,ARHGAP2,CD44,CDC42,CDH6,CFL1,CREBBP,EZR,GNAI1,GNAI2,GNB1,ITGA3,ITGAV,ITGB1,ITGB3,ITGB4,ITGB8,MYH9,MYL12A,MYL12B,MYL6,PIP5K1A,RAC1,RHOB,RHOC,RHOF                                                                                                    |
| Regulation of Actin-based Motility by Rho            | 10.2          | 0.183  | #NUM!   | ACTB,ACTR2,ARHGAP1,ARPC2,CDC42,CFL1,ITGA3,ITGAV,ITGB1,ITGB3,ITGB4,ITGB8,MYL12A,MYL12B,MYL6,PFN1,PIP5K1A,RAC1,RHOB,RHOC,RHOF                                                                                                                                                  |
| Sertoli Cell-Sertoli Cell Junction Signaling         | 10.2          | 0.136  | #NUM!   | ACTB,ACTG1,ACTN1,ACTN4,ATF2,CDC42,CLDN1,CTNNB1,F11R,ITGA3,ITGAV,ITGB1,ITGB3,ITGB4,ITGB8,JUP,MTMR2,NECTIN2,OCLN,PRKAG2,RAC1,TUBA1A,TUBA1B,TUBA1C,TUBA4A,TUBB,TUBB4B,VCL                                                                                                       |
| Germ Cell-Sertoli Cell Junction Signaling            | 9.92          | 0.147  | #NUM!   | ACTB,ACTG1,ACTN1,ACTN4,CDC42,CFL1,CTNNB1,IQGAP1,ITGA3,ITGB1,JUP,MTMR2,NECTIN2,RAC1,RHOB,RHOC,RHOF,TGFBF2,TUBA1A,TUBA1B,TUBA1C,TUBA4A,TUBB,TUBB4B,VCL                                                                                                                         |
| Actin Cytoskeleton Signaling                         | 9.79          | 0.123  | #NUM!   | ACTB,ACTG1,ACTN1,ACTN4,ACTR2,ARPC2,CDC42,CFL1,EZR,FGF18,FGF9,FLNA,IQGAP1,ITGA3,ITGAV,ITGB1,ITGB3,ITGB4,ITGB8,MYH9,MYL12A,MYL12B,MYL6,PFN1,PIP5K1A,RAC1,SSH3,TMSB10,TMSB4X,VA3,VCL                                                                                            |
| Leukocyte Extravasation Signaling                    | 9.44          | 0.135  | #NUM!   | ACTB,ACTG1,ACTN1,ACTN4,ARHGAP1,CD44,CDC42,CLDN1,CTNNB1,CYBA,EDIL3,EZR,F11R,GNAI1,GNAI2,ICAM1,ITGA3,ITGB1,MMP14,MMP7,MYL6,PRKCI,RAC1,TIMP1,VA3,VCAM1                                                                                                                          |
| Clathrin-mediated Endocytosis Signaling              | 9.44          | 0.135  | #NUM!   | ACTB,ACTG1,ACTR2,AP2B1,APOL1,ARPC2,CDC42,CLU,FGF18,FGF9,HSPA8,ITGB1,ITGB3,ITGB4,ITGB8,LDLR,MET,MYO1E,RAB11A,RAB5A,RAB5C,RAB7A,RAC1,STAM,UBB,UBC                                                                                                                              |
| CLEAR Signaling Pathway                              | 9.38          | 0.112  | #NUM!   | ATF2,ATP6V0C,ATP6V0D1,ATP6V0E1,ATP6V1E1,CD63,CREB3,CREB5,CREBBP,CTNS,CTSB,FGFR2,GBA,GNS,HIF1A,KCNIP3,NEU1,PML,PPARGC1A,PPP2R2A,PRKAG2,PRKCI,PSAP,RAB7A,SFN,TCIRG1,TGFBF2,TP53,YWHAB,YWHAH,YWHAQ,YWHAZ                                                                        |
| Integrin Signaling                                   | 9.22          | 0.127  | #NUM!   | ACTB,ACTG1,ACTN1,ACTN4,ACTR2,ARF1,ARF4,ARPC2,CAPN1,CAPNS1,CDC42,ITGA3,ITGAV,ITGB1,ITGB3,ITGB4,ITGB8,MYL12A,MYL12B,PFN1,RAC1,RHOB,RHOC,RHOF,TSPAN1,TSPAN4,VCL                                                                                                                 |
| Protein Kinase A Signaling                           | 9.13          | 0.0951 | #NUM!   | ADD1,AKAP12,ATF2,CALM1 (includes others),CREB3,CREB5,CREBBP,CTNNB1,DUSP1,DUSP3,DUSP4,DUSP5,FLNA,GNAI1,GNAI2,GNB1,GYS1,H1-5,KDELRL1,KDELRL2,KDELRL3,MYL12A,MYL12B,MYL6,NFKBIA,PDE1C,PRKAG2,PRKCI,PTP4A1,PTPN1,PTPRU,PYGL,RELA,SFN,TGFBF2,YWHAB,YWHAH,YWHAQ,YWHAZ              |
| Caveolar-mediated Endocytosis Signaling              | 8.99          | 0.213  | #NUM!   | ACTB,ACTG1,CD55,FLNA,HLA-A,HLA-B,HLA-C,ITGA3,ITGAV,ITGB1,ITGB3,ITGB4,ITGB8,PTPN1,RAB5A,RAB5C                                                                                                                                                                                 |
| PI3K/AKT Signaling                                   | 8.41          | 0.125  | #NUM!   | BCL2L1,CCND1,CDC37,CTNNB1,GYS1,HSP90AA1,IL1R1,INPPL1,ITGA3,ITGAV,ITGB1,ITGB3,ITGB4,ITGB8,JAK1,MCL1,NFKBIA,PPP2R2A,RELA,SFN,TP53,YWHAB,YWHAH,YWHAQ,YWHAZ                                                                                                                      |
| Signaling by Rho Family GTPases                      | 8.22          | 0.109  | #NUM!   | ACTB,ACTG1,ACTR2,ARPC2,CDC42,CDH6,CFL1,EZR,GNAI1,GNAI2,GNB1,IQGAP1,ITGA3,ITGAV,ITGB1,ITGB3,ITGB4,ITGB8,MYL12A,MYL12B,MYL6,PIP5K1A,PRKCI,RAC1,RELA,RHOB,RHOC,RHOF,VIM                                                                                                         |
| Osteoarthritis Pathway                               | 8.19          | 0.114  | #NUM!   | ANXA2,ANXA5,ATF2,CREB3,CREB5,CREBBP,CTNNB1,CXCL8,FGF18,FZD6,HIF1A,IL1R1,ITGA3,ITGAV,ITGB1,ITGB3,ITGB4,ITGB8,PPARGC1A,PRKAG2,PTHLH,RAC1,RELA,RUNX2,SLC39A8,SPP1,TGFBF2                                                                                                        |
| MSP-RON Signaling In Cancer Cells Pathway            | 7.84          | 0.143  | #NUM!   | ATF2,CCND1,CREB3,CREB5,CREBBP,CTNNB1,FLNA,HIF1A,ITGB1,ITGB4,KLK10,MET,NFKBIA,RELA,SFN,VIM,YWHAB,YWHAH,YWHAQ,YWHAZ                                                                                                                                                            |
| Axonal Guidance Signaling                            | 7.47          | 0.0806 | #NUM!   | ACTR2,ADAM9,ARPC2,BMP1,CDC42,CFL1,DPYSL2,EPHA2,FZD6,GNAI1,GNAI2,GNB1,ITGA3,ITGAV,ITGB1,ITGB3,ITGB4,ITGB8,MET,MMP14,MMP7,MYL12A,MYL12B,MYL6,NRP1,NTN4,PFN1,PLXNB2,PRKAG2,PRKCI,RAC1,SDC2,SEMA5A,SEMA6A,TUBA1A,TUBA1B,TUBA1C,TUBA4A,TUBB,TUBB4B,WNT7A                          |
| Tumor Microenvironment Pathway                       | 7.35          | 0.123  | #NUM!   | CCND1,CD44,CFLAR,CSF1,CXCL8,FGF18,FGF9,HIF1A,HLA-A,HLA-B,HLA-C,ICAM1,IL6,ITGB3,LGALS9,MMP14,MMP7,PLAU,RAC1,RELA,SLC2A1,SPP1                                                                                                                                                  |
| Neuroinflammation Signaling Pathway                  | 7.12          | 0.0946 | #NUM!   | APP,ATF2,CALB1,CFLAR,CREB3,CREB5,CREBBP,CTNNB1,CXCL8,GLS,HLA-A,HLA-B,HLA-C,HLA-DMA,HLA-DRA,HLA-DRB1,HMOX1,ICAM1,IL18,IL1R1,IL6,JAK1,MFGE8,MYD88,PSENEN,RAC1,RELA,SOD2,STAT1,TGFBF2                                                                                           |
| Hypoxia Signaling in the Cardiovascular System       | 7.08          | 0.184  | #NUM!   | ATF2,CREB3,CREB5,CREBBP,CSNK1D,HIF1A,HSP90AA1,NFKBIA,NQO1,P4HB,TP53,UBE2H,UBE2L3,UBE2V1                                                                                                                                                                                      |
| Regulation of Cellular Mechanics by Calpain Protease | 7.01          | 0.169  | #NUM!   | ACTN1,ACTN4,CAPN1,CAPNS1,CCNA2,CCND1,CCND3,EZR,ITGA3,ITGAV,ITGB1,ITGB3,ITGB4,ITGB8,VCL                                                                                                                                                                                       |
| Epithelial Adherens Junction Signaling               | 7             | 0.127  | #NUM!   | ACTR2,ARPC2,CDC42,CFL1,CTNNB1,IQGAP1,MET,MYL12A,MYL12B,NECTIN2,PPP2R2A,PRKAG2,RAC1,SFN,TGFBF2,VCL,YWHAB,YWHAH,YWHAQ,YWHAZ                                                                                                                                                    |
| IL-8 Signaling                                       | 6.72          | 0.11   | #NUM!   | BCL2L1,CCND1,CCND3,CDC42,CXCL1,CXCL8,GNAI1,GNAI2,GNB1,HMOX1,ICAM1,IQGAP1,ITGAV,ITGB3,LASP1,MYL12B,NFKBIA,PRKCI,RAC1,RELA,RHOB,RHOC,RHOF                                                                                                                                      |
| Ferroptosis Signaling Pathway                        | 6.11          | 0.129  | #NUM!   | ARF1,ARF4,CTSB,FDFT1,FTL,G3BP1,H2AC18/H2AC19,H2BC12,HMGCR,HMOX1,MACROH2A1,PRKAG2,SAT1,SLC39A8,SLC7A11,TP53,TXNRD1                                                                                                                                                            |
| Virus Entry via Endocytic Pathways                   | 6.1           | 0.144  | #NUM!   | ACTB,ACTG1,AP2B1,CD55,CDC42,FLNA,HLA-A,HLA-B,HLA-C,ITGB1,ITGB3,ITGB4,ITGB8,PRKCI,RAC1                                                                                                                                                                                        |
| Semaphorin Neuronal Repulsive Signaling Pathway      | 5.97          | 0.12   | #NUM!   | CD44,CFL1,DPYSL2,ITGA3,ITGAV,ITGB1,ITGB3,ITGB4,ITGB8,MYL12A,MYL12B,MYL6,NRP1,PRKAG2,RAC1,SEMA5A,SEMA6A,TP53                                                                                                                                                                  |
| Sirtuin Signaling Pathway                            | 5.72          | 0.0887 | #NUM!   | ACLY,APP,CXCL8,GABARAPL1,GLS,H1-5,HIF1A,MAP1LC3B,NDUFS5,NQO1,PKCFB3,PGAM1,PGK1,PPARGC1A,RELA,SCNN1A,SLC2A1,SOD2,TP53,TUBA1A,TUBA1B,TUBA1C,TUBA4A,UCP2,VDAC1,VDAC3                                                                                                            |
| Semaphorin Signaling in Neurons                      | 5.6           | 0.18   | #NUM!   | ARHGAP1,CDC42,CFL1,DPYSL2,ITGB1,MET,NRP1,RAC1,RHOB,RHOC,RHOF                                                                                                                                                                                                                 |
| EIF2 Signaling                                       | 5.56          | 0.0969 | #NUM!   | ACTB,CCND1,EIF3C,EIF4A1,EIF4G2,HNRNP1A,PTBP1,RNA5-8SN5,RPL22,RPL23,RPL26,RPL31,RPL32,RPL34,RPL37,RPL41,RPL5,RPS15A,RPS24,RPS3A,RPS6,RPS7                                                                                                                                     |

|                                                                                |      |        |       |                                                                                                                                                                                                                    |
|--------------------------------------------------------------------------------|------|--------|-------|--------------------------------------------------------------------------------------------------------------------------------------------------------------------------------------------------------------------|
| Agranulocyte Adhesion and Diapedesis                                           | 5.55 | 0.1    | #NUM! | ACTB,ACTG1,CCL20,CKLF,CLDN1,CXCL1,CXCL16,CXCL3,CXCL8,EZR,GNAI1,GNAI2,ICAM1,IL18,IL1R1,ITGB1,MMP14,MMP7,MYH9,MYL6,PPBP                                                                                              |
| Role of Tissue Factor in Cancer                                                | 5.49 | 0.129  | #NUM! | BCL2L1,CDC42,CFL1,CSF1,CXCL1,CXCL8,F2RL1,F3,ITGA3,ITGAV,ITGB1,ITGB3,P4HB,RAC1,TP53                                                                                                                                 |
| ERK/MAPK Signaling                                                             | 5.39 | 0.0977 | #NUM! | ATF2,CREB3,CREB5,CREBBP,DUSP1,DUSP4,ITGA3,ITGAV,ITGB1,ITGB3,ITGB4,ITGB8,PP2R2A,PRKAG2,PRKCI,RAC1,STAT1,YWHAB,YWHAH,YWHAQ,YWHAZ                                                                                     |
| Molecular Mechanisms of Cancer                                                 | 5.33 | 0.074  | #NUM! | BCL2L1,BMP1,CCND1,CCND3,CDC42,CFLAR,CREBBP,CTNNB1,FZD6,GNAI1,GNAI2,GNB1,HIF1A,ITGA3,ITGAV,ITGB1,ITGB3,ITGB4,ITGB8,JAK1,LRP6,NFKBIA,PRKAG2,PRKCI,PSE,NEN,RAC1,RELA,RHOB,RHOC,RHOF,TGFB2,TP53,WNT7A                  |
| Crosstalk between Dendritic Cells and Natural Killer Cells                     | 5.32 | 0.143  | #NUM! | ACTB,ACTG1,FSCN1,HLA-A,HLA-B,HLA-C,HLA-DRA,HLA-DRB1,IL18,IL6,NECTIN2,RELA,TNFSF10                                                                                                                                  |
| NRF2-mediated Oxidative Stress Response                                        | 5.25 | 0.0928 | #NUM! | ABCC4,ACTB,ACTG1,CREBBP,DNAJA1,DNAJB1,EPHX1,FOSL1,FTL,GSR,GSTP1,HACD3,HMOX1,HSP90AA1,NQO1,PRDX1,PRKCI,SOD2,TXN,TXNRD1,UBB,VCP                                                                                      |
| Ephrin Receptor Signaling                                                      | 5.25 | 0.099  | #NUM! | ACTR2,ARPC2,ATF2,CDC42,CFL1,CREB3,CREB5,CREBBP,EPHA2,GNAI1,GNAI2,GNB1,ITGA3,ITGAV,ITGB1,ITGB3,ITGB4,ITGB8,RAC1,SDC2                                                                                                |
| RAC Signaling                                                                  | 5.22 | 0.117  | #NUM! | ACTR2,ARPC2,CD44,CDC42,CFL1,IQGAP1,ITGA3,ITGAV,ITGB1,ITGB3,ITGB4,ITGB8,PIP5K1A,PRKCI,RAC1,RELA                                                                                                                     |
| Paxillin Signaling                                                             | 5.22 | 0.131  | #NUM! | ACTB,ACTG1,ACTN1,ACTN4,ARF1,CDC42,ITGA3,ITGAV,ITGB1,ITGB3,ITGB4,ITGB8,RAC1,VCL                                                                                                                                     |
| Actin Nucleation by ARP-WASP Complex                                           | 5.21 | 0.14   | #NUM! | ACTR2,ARPC2,CDC42,ITGA3,ITGAV,ITGB1,ITGB3,ITGB4,ITGB8,RAC1,RHOB,RHOC,RHOF,ACTB,ATF2,CCNA2,CCND1,CREB3,CREB5,CREBBP,GNAI1,GNAI2,GNB1,GYS1,HMGCR,PFKFB3,PFKP,PPARGC1A,PPP2R2A,PRKAG2,RAB11A,RAB6A,RAB7A,RAB8A,SLC2A1 |
| AMPK Signaling                                                                 | 5.11 | 0.0909 | #NUM! | ACTB,ACTG1,CASK,CDC42,CLDN1,CTNNB1,F11R,MYH9,MYL6,NECTIN2,OCLN,PPP2R2A,PRKAG2,PRKCI,RAC1,RELA,TGFB2,VCL                                                                                                            |
| Tight Junction Signaling                                                       | 4.88 | 0.101  | #NUM! | ADAM9,ATF2,CALM1 (includes others),CCND1,CDC42,COL4A2,CREB3,CREB5,CREBBP,CSF1,CTNNB1,IL18,IL1R1,ITGB3,MMP14,MMP7,NFKBIA,PTPN1,RAC1,RELA,RHOB,RHOC,RHOF,SPP1,VAV3                                                   |
| Role Of Osteoclasts In Rheumatoid Arthritis Signaling Pathway                  | 4.85 | 0.0812 | #NUM! | BCL2L1,CCND1,CDC42,CTNNB1,FZD6,GNAI1,GNAI2,GNB1,IL6,JAK1,LRP6,MMP14,MMP7,PRKAG2,RAC1,RELA,RHOB,RHOC,RHOF,STAT1,TGFB2,TP53,WNT7A                                                                                    |
| Colorectal Cancer Metastasis Signaling                                         | 4.82 | 0.0849 | #NUM! | ARHGDI1A,CDC42,CREBBP,CTBP2,NFKBIA,PCNA,PML,RAC1,RAN,RHOB,RHOC,RHOF,TP53                                                                                                                                           |
| Sumoylation Pathway                                                            | 4.72 | 0.126  | #NUM! | CD74,HLA-A,HLA-B,HLA-C,HLA-DMA,HLA-DRA,HLA-DRB1,TAPBP                                                                                                                                                              |
| Antigen Presentation Pathway                                                   | 4.65 | 0.205  | #NUM! | CD74,HLA-A,HLA-B,HLA-C,HLA-DMA,HLA-DRA,HLA-DRB1,TAPBP                                                                                                                                                              |
| Macropinocytosis Signaling                                                     | 4.65 | 0.145  | #NUM! | ACTN4,CDC42,CSF1,ITGB1,ITGB3,ITGB4,ITGB8,MET,PRKCI,RAB5A,RAC1                                                                                                                                                      |
| Multiple Sclerosis Signaling Pathway                                           | 4.64 | 0.0901 | #NUM! | C3,CAPN1,CAPNS1,CXCL1,CXCL8,DUSP1,HLA-A,HLA-B,HLA-C,HLA-DMA,HLA-DRA,HLA-DRB1,IL18,IL6,PARP14,PLAU,RNF213,SLC8B1,STAT1,TNFSF10                                                                                      |
| Superpathway of Cholesterol Biosynthesis                                       | 4.62 | 0.241  | #NUM! | ACAT2,DHCR24,DHCR7,FDFT1,HMGCR,MSMO1,TM7SF2                                                                                                                                                                        |
| Granulocyte Adhesion and Diapedesis                                            | 4.56 | 0.0952 | #NUM! | CCL20,CXCL8,GBP2,HIF1A,HLA-DMA,HLA-DRA,HLA-DRB1,IL18,IL6,MYD88,NFKBIA,PARP14,PKM,RELA,STAT1,TNFSF10                                                                                                                |
| HIF1α Signaling                                                                | 4.52 | 0.0913 | #NUM! | CREBBP,ELOC,HIF1A,HMOX1,HSP90AA1,HSPA8,IL6,MET,MMP14,MMP7,PKM,PRKCI,RAC1,RAN,RPS6,SAT1,SLC2A1,TP53,VIM                                                                                                             |
| Cholesterol Biosynthesis I                                                     | 4.52 | 0.385  | #NUM! | DHCR24,DHCR7,FDFT1,MSMO1,TM7SF2                                                                                                                                                                                    |
| Cholesterol Biosynthesis II (via 24,25-dihydrolanosterol)                      | 4.52 | 0.385  | #NUM! | DHCR24,DHCR7,FDFT1,MSMO1,TM7SF2                                                                                                                                                                                    |
| Cholesterol Biosynthesis III (via Desmosterol)                                 | 4.52 | 0.385  | #NUM! | DHCR24,DHCR7,FDFT1,MSMO1,TM7SF2                                                                                                                                                                                    |
| Fcy Receptor-mediated Phagocytosis in Macrophages and Monocytes                | 4.45 | 0.128  | #NUM! | ACTB,ACTG1,ACTR2,ARPC2,CDC42,EZR,HMOX1,PIP5K1A,PRKCI,RAB11A,RAC1,VAV3                                                                                                                                              |
| Pulmonary Fibrosis Idiopathic Signaling Pathway                                | 4.44 | 0.0767 | #NUM! | ACTB,ACTG1,ATF2,AXL,CCND1,COL4A2,CREBBP,CTNNB1,FGF18,FGF9,FGFR2,FZD6,IL6,ITGAV,ITGB1,MMP14,MMP7,MUC1,PLAU,RELA,TGFB2,THBS1,TP53,VIM,WNT7A                                                                          |
| mTOR Signaling                                                                 | 4.35 | 0.0888 | #NUM! | CD42,EIF3C,EIF4A1,EIF4G2,HIF1A,HMOX1,PPP2R2A,PRKAG2,PRKCI,RAC1,RHOB,RHOC,RHOF,RPS15A,RPS24,RPS3A,RPS6,RPS7                                                                                                         |
| TR/RXR Activation                                                              | 4.23 | 0.131  | #NUM! | AKR1C3,ENO1,HIF1A,LDLR,ME1,PFKP,PPARGC1A,RCAN2,SLC16A3,SLC2A1,UCP2                                                                                                                                                 |
| Coronavirus Replication Pathway                                                | 4.18 | 0.178  | #NUM! | HNRNP1A1,IFITM1,TUBA1A,TUBA1B,TUBA1C,TUBA4A,TUBB,TUBB4B                                                                                                                                                            |
| PTEN Signaling                                                                 | 4.14 | 0.1    | #NUM! | BCL2L1,CCND1,CDC42,FGFR2,INPPL1,ITGA3,ITGAV,ITGB1,ITGB3,ITGB4,ITGB8,RAC1,RELA,TGFB2,YWHAH                                                                                                                          |
| Coronavirus Pathogenesis Pathway                                               | 4.12 | 0.0882 | #NUM! | ADAM9,CCND1,CXCL8,HIF1A,IL6,JAK1,NFKBIA,RAB7A,RELA,RPS15A,RPS24,RPS3A,RPS6,RPS7,STAT1,STING1,TGFB2,TP53                                                                                                            |
| Glioma Invasiveness Signaling                                                  | 4.07 | 0.137  | #NUM! | CD44,CDC42,ITGAV,ITGB3,PLAU,RAC1,RHOB,RHOC,RHOF,TIMP1                                                                                                                                                              |
| Role of IL-17F in Allergic Inflammatory Airway Diseases                        | 4.04 | 0.17   | #NUM! | ATF2,CREB3,CREB5,CREBBP,CXCL1,CXCL8,IL6,RELA                                                                                                                                                                       |
| Macrophage Classical Activation Signaling Pathway                              | 4.03 | 0.0899 | #NUM! | CCL20,CXCL8,GBP2,HIF1A,HLA-DMA,HLA-DRA,HLA-DRB1,IL18,IL6,JAK1,MYD88,NFKBIA,PARP14,PKM,RELA,STAT1,TNFSF10                                                                                                           |
| ERK5 Signaling                                                                 | 4.02 | 0.135  | #NUM! | ATF2,CREB3,CREB5,CREBBP,FOSL1,SFN,YWHAB,YWHAH,YWHAQ,YWHAZ                                                                                                                                                          |
| Hepatic Fibrosis / Hepatic Stellate Cell Activation                            | 3.89 | 0.0876 | #NUM! | COL4A2,CSF1,CXCL3,CXCL8,ECE1,FGFR2,ICAM1,IL1R1,IL6,KLF6,MET,MYH9,MYL6,RELA,STAT1,TGFB2,TIMP1                                                                                                                       |
| Role of Macrophages, Fibroblasts and Endothelial Cells in Rheumatoid Arthritis | 3.89 | 0.0723 | #NUM! | ATF2,CALM1 (includes others),CCND1,CREB3,CREB5,CREBBP,CSF1,CSNK1D,CTNNB1,CXCL8,F2RL1,FZD6,ICAM1,IL18,IL1R1,IL32,IL6,LRP6,MYD88,NFKBIA,PRKCI,RAC1,RELA,WNT7A                                                        |
| Wound Healing Signaling Pathway                                                | 3.87 | 0.0794 | #NUM! | COL4A2,CXCL8,FGFR2,IL18,IL1R1,IL6,ITGA3,ITGB1,ITGB4,JAK1,LAMA3,LAMB3,LAMC1,LAMC2,NFKBIA,RAC1,STAT1,TGFB2,TNFSF10,VIM                                                                                               |
| RHOA Signaling                                                                 | 3.87 | 0.105  | #NUM! | ACTB,ACTG1,ACTR2,ANLN,ARHGAP1,ARPC2,CFL1,EZR,MYL12A,MYL12B,MYL6,PFN1,PIPSK1A                                                                                                                                       |
| Glycolysis I                                                                   | 3.82 | 0.222  | #NUM! | ENO1,GAPDH,PFKP,PGAM1,PGK1,PKM                                                                                                                                                                                     |
| 14-3-3-mediated Signaling                                                      | 3.77 | 0.102  | #NUM! | PRKCI,SFN,TUBA1A,TUBA1B,TUBA1C,TUBA4A,TUBB,TUBB4B,VIM,YWHAB,YWHAH,YWHAQ,YWHAZ                                                                                                                                      |
| Estrogen Receptor Signaling                                                    | 3.65 | 0.066  | #NUM! | ATF2,CCND1,CFL1,CREB3,CREB5,CREBBP,CTBP2,GNAI1,GNAI2,GNB1,HIF1A,HSP90AA1,JAK1,MMP14,MMP7,MYL12A,MYL12B,MYL6,NDUFS5,PCNA,PPARGC1A,PRKAG2,PRKCI,RELA,RUNX2,SOD2,TP53                                                 |
| p53 Signaling                                                                  | 3.62 | 0.112  | #NUM! | BCL2L1,CCND1,CSNK1D,CTNNB1,HIF1A,PCNA,PERP,PML,SFN,THBS1,TP53                                                                                                                                                      |
| HGF Signaling                                                                  | 3.6  | 0.0985 | #NUM! | ATF2,CCND1,CDC42,IL6,ITGA3,ITGAV,ITGB1,ITGB3,ITGB4,ITGB8,MET,PRKCI,RAC1                                                                                                                                            |
| PAK Signaling                                                                  | 3.53 | 0.103  | #NUM! | CDC42,CFL1,ITGA3,ITGAV,ITGB1,ITGB3,ITGB4,ITGB8,MYL12A,MYL12B,MYL6,RAC1                                                                                                                                             |

|                                                                               |      |        |       |                                                                                                                                                                                                                  |
|-------------------------------------------------------------------------------|------|--------|-------|------------------------------------------------------------------------------------------------------------------------------------------------------------------------------------------------------------------|
| p70S6K Signaling                                                              | 3.5  | 0.0963 | #NUM! | BCAP31,F2RL1,GNAI1,GNAI2,JAK1,PPP2R2A,PRKCI,RPS6,SFN,YWHAB,YWHAH,YWHAQ,YWHAZ                                                                                                                                     |
| WNT/ $\beta$ -catenin Signaling                                               | 3.42 | 0.0862 | #NUM! | CCND1,CD44,CREBBP,CSNK1D,CTNNB1,FZD6,GJA1,LRP6,MMP7,PPP2R2A,TGFBR2,TP53,UBB,UBC,WNT7A                                                                                                                            |
| Glucocorticoid Receptor Signaling                                             | 3.41 | 0.0583 | #NUM! | ACTB,ANXA1,BCL2L1,CREBBP,CXCL3,CXCL8,DUSP1,GJA1,HLA-A,HLA-B,HLA-C,HLA-DMA,HLA-DRA,HLA-DRB1,HSP90AA1,HSPA8,ICAM1,IL1R1,IL6,JAK1,KRT18,KRT19,KRT7,KRT8,NDUFS5,NFKBIA,PLAU,PRKAG2,RAC1,RELA,SLPI,STAT1,TGFBR2,YWHAH |
| Ephrin B Signaling                                                            | 3.41 | 0.125  | #NUM! | CAP1,CDC42,CFL1,CTNNB1,GNAI1,GNAI2,GNB1,RAC1,VAV3                                                                                                                                                                |
| Iron homeostasis signaling pathway                                            | 3.41 | 0.0942 | #NUM! | ACO1,ATP6V0C,ATP6V0D1,ATP6V0E1,ATP6V1E1,BMP1,CP,FTL,HIF1A,HMOX1,IL6,JAK1,T CIRG1                                                                                                                                 |
| Th1 Pathway                                                                   | 3.36 | 0.0984 | #NUM! | HLA-A,HLA-B,HLA-DMA,HLA-DRA,HLA-DRB1,ICAM1,IL18,IL6,JAK1,LGALS9,PSENEN,STAT1                                                                                                                                     |
| Gap Junction Signaling                                                        | 3.3  | 0.0808 | #NUM! | ACTB,ACTG1,CSNK1D,CTNNB1,DBN1,GJA1,GNAI1,GNAI2,PRKAG2,PRKCI,TUBA1A,TUBA1B,TUBA1C,TUBA4A,TUBB,TUBB4B                                                                                                              |
| Pulmonary Healing Signaling Pathway                                           | 3.28 | 0.0804 | #NUM! | CCND1,CDC42,CFL1,CTNNB1,FGFR2,FZD6,HIF1A,MMP14,MMP7,MYD88,NFKBIA,PRKAG2,PRKCI,RAC1,THBS1,WNT7A                                                                                                                   |
| Regulation of eIF4 and p70S6K Signaling                                       | 3.24 | 0.0829 | #NUM! | EIF3C,EIF4A1,EIF4G2,ITGA3,ITGAV,ITGB1,ITGB3,ITGB4,ITGB8,PPP2R2A,RPS15A,RPS24,RPS3A,RPS6,RPS7                                                                                                                     |
| iNOS Signaling                                                                | 3.23 | 0.149  | #NUM! | CALM1 (includes others),CREBBP,JAK1,MYD88,NFKBIA,RELA,STAT1                                                                                                                                                      |
| Endocannabinoid Developing Neuron Pathway                                     | 3.2  | 0.0945 | #NUM! | ATF2,CCND1,CREB3,CREB5,CREBBP,CTNNB1,GNAI1,GNAI2,GNB1,MGLL,PRKAG2,RAC1                                                                                                                                           |
| PFKFB4 Signaling Pathway                                                      | 3.17 | 0.146  | #NUM! | ATF2,CREB3,CREB5,CREBBP,PRKAG2,TKT,TP53                                                                                                                                                                          |
| Role of Osteoblasts, Osteoclasts and Chondrocytes in Rheumatoid Arthritis     | 3.16 | 0.0759 | #NUM! | BMP1,CALM1 (includes others),CSF1,CSNK1D,CTNNB1,FZD6,IL18,IL1R1,IL6,ITGB3,LRP6,MMP14,NFKBIA,RELA,R UNX2,SPP1,WNT7A                                                                                               |
| Role of IL-17A in Psoriasis                                                   | 3.14 | 0.286  | #NUM! | CCL20,CXCL1,CXCL3,CXCL8                                                                                                                                                                                          |
| Renal Cell Carcinoma Signaling                                                | 3.11 | 0.114  | #NUM! | CDC42,CREBBP,ELOC,HIF1A,MET,RAC1,SLC2A1,UBB,UBC                                                                                                                                                                  |
| Interferon Signaling                                                          | 3.1  | 0.167  | #NUM! | IFI6,IFITM1,JAK1,MX1,RELA,STAT1                                                                                                                                                                                  |
| Cell Cycle: G2/M DNA Damage Checkpoint Regulation                             | 3.06 | 0.14   | #NUM! | PLK1,SFN,TP53,YWHAB,YWHAH,YWHAQ,YWHAZ                                                                                                                                                                            |
| FAT10 Cancer Signaling Pathway                                                | 3.06 | 0.14   | #NUM! | CTNNB1,IL6,NFKBIA,PCNA,RELA,TGFBR2,TP53                                                                                                                                                                          |
| Prostate Cancer Signaling                                                     | 3.06 | 0.0965 | #NUM! | ATF2,CCND1,CREB3,CREB5,CREBBP,CTNNB1,GSTP1,HSP90AA1,NFKBIA,RELA,TP53                                                                                                                                             |
| Gqg Signaling                                                                 | 3.04 | 0.0824 | #NUM! | CALM1 (includes others),CDC42,GNAI1,GNAI2,GNB1,GYS1,HMOX1,NFKBIA,PRKCI,RAC1,RELA,RHOB,RHO C,RHOF                                                                                                                 |
| Production of Nitric Oxide and Reactive Oxygen Species in Macrophages         | 3    | 0.0785 | #NUM! | APOL1,CDC42,CLU,CREBBP,CYBA,JAK1,NFKBIA,PPP2R2A,PRKCI,RAC1,RELA,RHOB,RH OC,RHOF,STAT1                                                                                                                            |
| Neuregulin Signaling                                                          | 2.97 | 0.094  | #NUM! | ERBB4,ERRF1,HSP90AA1,ITGA3,ITGAV,ITGB1,ITGB3,ITGB4,ITGB8,PRKCI,RPS6                                                                                                                                              |
| Triacylglycerol Biosynthesis                                                  | 2.96 | 0.135  | #NUM! | DGAT1,ELOVL1,GPAT4,LPCAT1,MBOAT7,PLPP2,PORCN                                                                                                                                                                     |
| Inhibition of Matrix Metalloproteases                                         | 2.91 | 0.154  | #NUM! | HSPG2,MMP14,MMP7,SDC2,TFPI2,TIMP1                                                                                                                                                                                |
| MSP-RON Signaling In Macrophages Pathway                                      | 2.9  | 0.0924 | #NUM! | ATF2,CREB3,CREB5,CREBBP,HLA-DMA,HLA-DRA,HLA-DRB1,KLK10,RELA,SBNO2,STAT1                                                                                                                                          |
| Gluconeogenesis I                                                             | 2.88 | 0.185  | #NUM! | ENO1,GAPDH,ME1,PGAM1,PGK1                                                                                                                                                                                        |
| Agrin Interactions at Neuromuscular Junction                                  | 2.87 | 0.116  | #NUM! | ACTB,ACTG1,CDC42,DAG1,ERBB4,ITGB1,LAMC1,RAC1                                                                                                                                                                     |
| Natural Killer Cell Signaling                                                 | 2.85 | 0.0758 | #NUM! | CDC42,CFL1,HLA-A,HLA-B,HLA-C,HSPA8,IL18,ITGB1,MYD88,NECTIN2,PVR,RAC1,RELA,TNFSF10,VAV3                                                                                                                           |
| FGF Signaling                                                                 | 2.84 | 0.105  | #NUM! | ATF2,CREB3,CREB5,CREBBP,FGF18,FGF9,FGFR2,MET,RAC1                                                                                                                                                                |
| Calcium Signaling                                                             | 2.83 | 0.0731 | #NUM! | ASPH,ATF2,ATP2A2,ATP2B4,CALM1 (includes others),CREB3,CREB5,CREBBP,MYH9,MYL6,PRKAG2,RCAN2,SLC8B1,TPM1,TPM3,TPM4                                                                                                  |
| Role Of Osteoblasts In Rheumatoid Arthritis Signaling Pathway                 | 2.83 | 0.0708 | #NUM! | CSNK1D,CTNNB1,CTSB,CTSE,CTSZ,CXCL8,FZD6,IL18,IL6,JAK1,LRP6,MMP14,MMP7,RUN X2,STAT1,TNFSF10,WNT7A                                                                                                                 |
| Pathogen Induced Cytokine Storm Signaling Pathway                             | 2.82 | 0.0618 | #NUM! | C3,CCL20,CKLF,COL4A2,CXCL1,CXCL16,CXCL3,CXCL8,FTL,HLA-DMA,HLA-DRA,HLA-DRB1,HMGCR,IL18,IL1R1,IL6,JAK1,MYD88,PPBP,SLC2A1,STAT1,STING1,TNFSF10                                                                      |
| LXR/RXR Activation                                                            | 2.79 | 0.0894 | #NUM! | APOL1,C3,CLU,FDFT1,HMGCR,IL18,IL1R1,IL6,LDLR,RELA,SAA1                                                                                                                                                           |
| ID1 Signaling Pathway                                                         | 2.78 | 0.0746 | #NUM! | APP,BCL2L1,CCND1,CREBBP,CTNNB1,FGFR2,HIF1A,IL6,PLXNB2,RHOC,TGFBR2,TGM2,TP53,TYMS,VIM                                                                                                                             |
| HOTAIR Regulatory Pathway                                                     | 2.74 | 0.0798 | #NUM! | CD44,CREBBP,CTNNB1,ICAM1,MET,MMP14,MMP7,NFKBIA,RELA,RHOC,SPP1,VIM,WNT7A                                                                                                                                          |
| Role of IL-17A in Arthritis                                                   | 2.72 | 0.123  | #NUM! | ATF2,CCL20,CXCL1,CXCL3,CXCL8,NFKBIA,RELA                                                                                                                                                                         |
| Synaptogenesis Signaling Pathway                                              | 2.65 | 0.0635 | #NUM! | ACTR2,AP2B1,ARPC2,ATF2,CALM1 (includes others),CDC42,CDH6,CFL1,CREB3,CREB5,CREBBP,CTNNB1,EPHA2,HSPA8,MAP1B,PRKAG2,RAB5A,RAB5C,RAC1,THBS1                                                                         |
| Endocannabinoid Cancer Inhibition Pathway                                     | 2.65 | 0.0816 | #NUM! | ATF2,CCND1,CCND3,CREB3,CREB5,CREBBP,CTNNB1,GNAI1,GNAI2,HIF1A,PRKAG2,VIM                                                                                                                                          |
| $\gamma$ -linolenate Biosynthesis II (Animals)                                | 2.6  | 0.211  | #NUM! | ACSL1,CYB5R3,FADS1,FADS2                                                                                                                                                                                         |
| Ribonucleotide Reductase Signaling Pathway                                    | 2.58 | 0.0765 | #NUM! | ACTB,ATF2,CCND1,CREB3,CREB5,CREBBP,CTNNB1,HIF1A,IL6,MET,PARP14,THBS1,TP53                                                                                                                                        |
| fMLP Signaling in Neutrophils                                                 | 2.57 | 0.084  | #NUM! | ACTR2,ARPC2,CALM1 (includes others),CDC42,GNAI1,GNAI2,GNB1,NFKBIA,PRKCI,RAC1,RELA                                                                                                                                |
| Atherosclerosis Signaling                                                     | 2.57 | 0.084  | #NUM! | APOL1,CLU,CSF1,CXCL8,F3,ICAM1,IL18,IL6,PLAAT4,RELA,TNFRSF12A                                                                                                                                                     |
| TREM1 Signaling                                                               | 2.57 | 0.104  | #NUM! | CXCL3,CXCL8,ICAM1,IL18,IL6,ITGB1,MYD88,RELA                                                                                                                                                                      |
| Regulation Of The Epithelial Mesenchymal Transition By Growth Factors Pathway | 2.54 | 0.0729 | #NUM! | CDC42,FGF18,FGF9,FGFR2,ID2,IL6,JAK1,MET,OCLN,RAC1,RELA,TGFBR2,TNFSF10,VIM                                                                                                                                        |

|                                                                           |      |        |       |                                                                                                                                                                                             |
|---------------------------------------------------------------------------|------|--------|-------|---------------------------------------------------------------------------------------------------------------------------------------------------------------------------------------------|
| Factors Promoting Cardiogenesis in Vertebrates                            | 2.53 | 0.0789 | #NUM! | ATF2,BMP1,CCND1,CREB3,CREB5,CREBBP,CTNNB1,FZD6,LRP6,PRKCI,TGFB2,WNT7A                                                                                                                       |
| Th1 and Th2 Activation Pathway                                            | 2.53 | 0.0756 | #NUM! | HLA-A,HLA-B,HLA-DMA,HLA-DRA,HLA-DRB1,ICAM1,IL18,IL6,JAK1,LGALS9,PTEN,STAT1,TGFB2                                                                                                            |
| P2Y Purinergic Receptor Signaling Pathway                                 | 2.52 | 0.0827 | #NUM! | ATF2,CREB3,CREB5,CREBBP,GNAI1,GNAI2,GNB1,ITGB3,PRKAG2,PRKCI,RELA                                                                                                                            |
| Calcium Transport I                                                       | 2.51 | 0.3    | #NUM! | ANXA5,ATP2A2,ATP2B4                                                                                                                                                                         |
| Regulation of the Epithelial-Mesenchymal Transition Pathway               | 2.48 | 0.0718 | #NUM! | CTNNB1,FGF18,FGF9,FGFR2,FZD6,HIF1A,HD2,JAK1,MET,PTEN,PTG01,RELA,TGFB2,WNT7A                                                                                                                 |
| Huntington's Disease Signaling                                            | 2.45 | 0.0636 | #NUM! | ATF2,BCL2L1,CAPN1,CAPNS1,CREB3,CREB5,CREBBP,DNAJB1,GLS,GNB1,HSPA8,PRKCI,PSMB2,PSMD11,TGM2,TP53,UBB,UBC                                                                                      |
| Cardiac Hypertrophy Signaling                                             | 2.45 | 0.0651 | #NUM! | ATF2,CALM1 (includes others),CDC42,CREBBP,GNAI1,GNAI2,GNB1,IL6,MYL12A,MYL12B,MYL6,PRKAG2,RAC1,RHOB,RHOC,RHOF,TGFB2                                                                          |
| Cardiac Hypertrophy Signaling (Enhanced)                                  | 2.45 | 0.0535 | #NUM! | ATF2,ATP2A2,CALM1 (includes others),CTNNB1,CXCL8,FGF18,FGF9,FGFR2,FZD6,GNAI1,GNAI2,GNB1,IL18,IL1R1,IL6,ITGA3,ITGAV,ITGB1,ITGB3,ITGB4,ITGB8,PDE1C,PRKAG2,PRKCI,RELA,RPS6,TGFB2,TNFSF10,WNT7A |
| Necroptosis Signaling Pathway                                             | 2.44 | 0.0769 | #NUM! | AXL,CAPN1,CAPNS1,CFLAR,JAK1,PYGL,STAT1,TNFSF10,TP53,UBC,VDAC1,VDAC3                                                                                                                         |
| Erythropoietin Signaling Pathway                                          | 2.42 | 0.0734 | #NUM! | BCL2L1,CCND1,CTNNB1,CXCL8,HIF1A,IL18,IL6,NFKBIA,PRKCI,RAC1,RELA,TNFSF10,TP53                                                                                                                |
| Inhibition of Angiogenesis by TSP1                                        | 2.42 | 0.147  | #NUM! | HSPG2,SDC2,TGFB2,THBS1,TP53                                                                                                                                                                 |
| Airway Pathology in Chronic Obstructive Pulmonary Disease                 | 2.41 | 0.0847 | #NUM! | CCL20,CXCL1,CXCL3,CXCL8,FGF18,FGF9,IL18,IL6,LCN2,TNFSF10                                                                                                                                    |
| BEX2 Signaling Pathway                                                    | 2.4  | 0.0976 | #NUM! | CCND1,CTNNB1,HIF1A,LGALS1,NFKBIA,PPP2R2A,RELA,SPP1                                                                                                                                          |
| Pentose Phosphate Pathway                                                 | 2.39 | 0.273  | #NUM! | PGD,TALDO1,TKT                                                                                                                                                                              |
| p38 MAPK Signaling                                                        | 2.36 | 0.0833 | #NUM! | ATF2,CREB3,CREB5,CREBBP,DUSP1,IL18,IL1R1,STAT1,TGFB2,TP53                                                                                                                                   |
| MYC Mediated Apoptosis Signaling                                          | 2.35 | 0.12   | #NUM! | BCL2L1,CFLAR,CREBBP,MCL1,PRKAG2,TP53                                                                                                                                                        |
| CDX Gastrointestinal Cancer Signaling Pathway                             | 2.34 | 0.0693 | #NUM! | BMP1,CCND1,CTNNB1,CXCL8,FZD6,IL18,IL6,JAK1,KLF5,RAC1,RELA,SLC15A1,TNFSF10,WNT7A                                                                                                             |
| BAG2 Signaling Pathway                                                    | 2.33 | 0.0952 | #NUM! | ANXA2,CTSB,HSP90AA1,HSPA8,PSMB2,PSMD11,RELA,TP53                                                                                                                                            |
| Role Of Chondrocytes In Rheumatoid Arthritis Signaling Pathway            | 2.33 | 0.078  | #NUM! | CFLAR,CXCL8,IL18,IL1R1,IL6,ITGB1,MMP14,MMP7,PLAU,PRKAG2,RUNX2                                                                                                                               |
| IL-17A Signaling in Airway Cells                                          | 2.32 | 0.104  | #NUM! | CCL20,CXCL1,CXCL3,IL6,JAK1,NFKBIA,RELA                                                                                                                                                      |
| Stearate Biosynthesis I (Animals)                                         | 2.32 | 0.104  | #NUM! | ACOT7,ACSL1,DHCR24,ELOVL1,MBOAT7,PORCN,SRD5A3                                                                                                                                               |
| Amyloid Processing                                                        | 2.31 | 0.118  | #NUM! | APP,CAPN1,CAPNS1,CSNK1D,PRKAG2,PTEN                                                                                                                                                         |
| Vitamin-C Transport                                                       | 2.29 | 0.174  | #NUM! | LRRC8A,SLC2A1,TXN,TXNRD1                                                                                                                                                                    |
| IL-15 Production                                                          | 2.29 | 0.0813 | #NUM! | AXL,EPHA2,ERBB4,FGFR2,IL6,JAK1,MET,PRKCI,RELA,STAT1                                                                                                                                         |
| IGF-1 Signaling                                                           | 2.28 | 0.0865 | #NUM! | IGFBP7,JAK1,PRKAG2,PRKCI,SFN,YWHAB,YWHAH,YWHAQ,YWHAZ                                                                                                                                        |
| Role of Hypercytokinemia/hyperchemokines in the Pathogenesis of Influenza | 2.27 | 0.093  | #NUM! | CXCL3,CXCL8,IL18,IL6,JAK1,MX1,MYD88,STAT1                                                                                                                                                   |
| HIPPO signaling                                                           | 2.27 | 0.093  | #NUM! | CD44,CSNK1D,PPP2R2A,SFN,YWHAB,YWHAH,YWHAQ,YWHAZ                                                                                                                                             |
| Acute Phase Response Signaling                                            | 2.26 | 0.0703 | #NUM! | C3,CFB,CP,FTL,HMOX1,IL18,IL1R1,IL6,MYD88,NFKBIA,RELA,SAA1,SOD2                                                                                                                              |
| Dopamine-DARPP32 Feedback in cAMP Signaling                               | 2.26 | 0.0703 | #NUM! | ATF2,ATP2A2,CALM1 (includes others),CREB3,CREB5,CREBBP,CSNK1D,GNAI1,GNAI2,KCNJ16,PPP2R2A,PRKAG2,PRKCI                                                                                       |
| Protein Ubiquitination Pathway                                            | 2.24 | 0.062  | #NUM! | CRYAB,DNAJA1,DNAJB1,ELOC,HLA-A,HLA-B,HLA-C,HSP90AA1,HSPA8,PSMB2,PSMD11,UBB,UBC,UBE2H,UBE2L3,UBE2V1,UCLH1                                                                                    |
| Xenobiotic Metabolism AHR Signaling Pathway                               | 2.24 | 0.092  | #NUM! | AHR,CREBBP,GSTP1,HSP90AA1,IL6,NQO1,RELA,UGT1A9 (includes others)                                                                                                                            |
| Gas Signaling                                                             | 2.24 | 0.08   | #NUM! | ADD1,ADORA2B,ATF2,CREB3,CREB5,CREBBP,GNAI1,GNAI2,GNB1,PRKAG2                                                                                                                                |
| PI3K Signaling in B Lymphocytes                                           | 2.24 | 0.0759 | #NUM! | ATF2,C3,CALM1 (includes others),CD81,MALT1,NFKBIA,PIK3AP1,PRKCI,RAC1,RELA,VA3                                                                                                               |
| Pancreatic Adenocarcinoma Signaling                                       | 2.21 | 0.0794 | #NUM! | BCL2L1,CCND1,CDC42,HMOX1,JAK1,RAC1,RELA,STAT1,TGFB2,TP53                                                                                                                                    |
| HMGB1 Signaling                                                           | 2.21 | 0.0719 | #NUM! | CDC42,CXCL8,ICAM1,IL18,IL1R1,IL6,RAC1,RELA,RHOB,RHOC,RHOF,TNFSF10                                                                                                                           |
| GP6 Signaling Pathway                                                     | 2.19 | 0.0787 | #NUM! | CALM1 (includes others),COL4A2,ITGB3,LAMA3,LAMB3,LAMC1,LAMC2,PRKCI,RAC1,VA3                                                                                                                 |
| CXCR4 Signaling                                                           | 2.19 | 0.0714 | #NUM! | CDC42,GNAI1,GNAI2,GNB1,MYL12A,MYL12B,MYL6,PRKCI,RAC1,RHOB,RHOC,RHOF                                                                                                                         |
| GNRH Signaling                                                            | 2.15 | 0.0681 | #NUM! | ATF2,CALM1 (includes others),CDC42,CREB3,CREB5,CREBBP,GNAI1,GNAI2,GNB1,PRKAG2,PRKCI,RAC1,RELA                                                                                               |
| IL-10 Signaling                                                           | 2.15 | 0.0972 | #NUM! | HMOX1,IL18,IL1R1,IL6,JAK1,NFKBIA,RELA                                                                                                                                                       |
| Apelin Adipocyte Signaling Pathway                                        | 2.12 | 0.0879 | #NUM! | GNAI1,GNAI2,GPX1,GSTP1,HIF1A,PPARGC1A,PRKAG2,RAC1                                                                                                                                           |
| Oxytocin Signaling Pathway                                                | 2.12 | 0.0603 | #NUM! | ATF2,ATP2B4,CALM1 (includes others),CREB3,CREB5,CREBBP,CXCL8,GJA1,GNAI1,GNAI2,GNB1,IL6,MYH9,MYL6,PRKAG2,PRKCI,RELA                                                                          |
| NAD Signaling Pathway                                                     | 2.11 | 0.0728 | #NUM! | GJA1,H1-5,H2BC12,HIF1A,NT5E,PARP14,PPARGC1A,PRKAG2,SOD2,TP53,TPCN1                                                                                                                          |
| Autophagy                                                                 | 2.09 | 0.0648 | #NUM! | ATF2,CALM1 (includes others),CREB3,CREB5,CREBBP,GABARAPL1,HIF1A,MAP1LC3B,MYD88,PPP2R2A,PRKAG2,RAB7A,RIPK2,TP53                                                                              |
| IL-17A Signaling in Gastric Cells                                         | 2.09 | 0.154  | #NUM! | CCL20,CXCL1,CXCL8,RELA                                                                                                                                                                      |

|                                                                            |      |        |       |                                                                                                                                                                                                    |
|----------------------------------------------------------------------------|------|--------|-------|----------------------------------------------------------------------------------------------------------------------------------------------------------------------------------------------------|
| Gα12/13 Signaling                                                          | 2.05 | 0.0752 | #NUM! | CDC42,CDH6,CTNNB1,F2RL1,MYL12A,MYL12B,MYL6,NFKBIA,RELA,VAV3                                                                                                                                        |
| Glutathione Redox Reactions II                                             | 2.04 | 0.4    | #NUM! | GSR,TXNDC12                                                                                                                                                                                        |
| Polyamine Regulation in Colon Cancer                                       | 2.04 | 0.103  | #NUM! | CTNNB1,EIF5A,OAZ1,SAT1,SMS,TP53                                                                                                                                                                    |
| CDK5 Signaling                                                             | 2    | 0.0783 | #NUM! | CAPN1,ITGA3,ITGB1,LAMA3,LAMB3,LAMC1,LAMC2,PPP2R2A,PRKAG2                                                                                                                                           |
| IL-1 Signaling                                                             | 1.99 | 0.0833 | #NUM! | GNAI1,GNAI2,GNB1,IL1R1,MYD88,NFKBIA,PRKAG2,RELA                                                                                                                                                    |
| Death Receptor Signaling                                                   | 1.99 | 0.0833 | #NUM! | ACTB,ACTG1,CFLAR,NFKBIA,PARP14,RELA,TNFRSF21,TNFSF10                                                                                                                                               |
| Role of PKR in Interferon Induction and Antiviral Response                 | 1.99 | 0.0735 | #NUM! | ATF2,HSP90AA1,HSPA8,IL18,JAK1,MYD88,NFKBIA,RELA,STAT1,TP53                                                                                                                                         |
| NF-κB Activation by Viruses                                                | 1.97 | 0.0897 | #NUM! | ITGA3,ITGAV,ITGB1,ITGB3,NFKBIA,PRKCI,RELA                                                                                                                                                          |
| GADD45 Signaling                                                           | 1.97 | 0.1    | #NUM! | CCND1,CCND3,PCNA,RELA,TGFBR2,TP53                                                                                                                                                                  |
| Toll-like Receptor Signaling                                               | 1.97 | 0.0897 | #NUM! | IL18,MYD88,NFKBIA,RELA,TNFAIP3,UBB,UBC                                                                                                                                                             |
| IL-7 Signaling Pathway                                                     | 1.97 | 0.0897 | #NUM! | CCND1,CCND3,JAK1,MCL1,MET,SLC2A1,STAT1                                                                                                                                                             |
| Aryl Hydrocarbon Receptor Signaling                                        | 1.95 | 0.0692 | #NUM! | AHR,CCNA2,CCND1,CCND3,GSTP1,HSP90AA1,IL6,NQO1,RELA,TGM2,TP53                                                                                                                                       |
| Reelin Signaling in Neurons                                                | 1.95 | 0.0725 | #NUM! | ACTR2,APP,ARHGEF38,ARPC2,CDC42,CFL1,ITGA3,ITGB1,MAP1B,RAC1                                                                                                                                         |
| Thrombin Signaling                                                         | 1.95 | 0.0622 | #NUM! | ARHGEF38,CDC42,GNAI1,GNAI2,GNB1,MYL12A,MYL12B,MYL6,PRKCI,RAC1,RELA,RHOB,RHOC,RHOF                                                                                                                  |
| VEGF Signaling                                                             | 1.91 | 0.0808 | #NUM! | ACTB,ACTG1,ACTN1,ACTN4,BCL2L1,HIF1A,SFN,VCL                                                                                                                                                        |
| Apelin Cardiomyocyte Signaling Pathway                                     | 1.91 | 0.0808 | #NUM! | ATP2A2,GNAI1,GNAI2,HIF1A,MYL12A,MYL12B,MYL6,PRKCI                                                                                                                                                  |
| Estrogen-Dependent Breast Cancer Signaling                                 | 1.88 | 0.0864 | #NUM! | ATF2,CCND1,CREB3,CREB5,CREBBP,HSD17B12,RELA                                                                                                                                                        |
| Pentose Phosphate Pathway (Non-oxidative Branch)                           | 1.87 | 0.333  | #NUM! | TALDO1,TKT                                                                                                                                                                                         |
| Zymosterol Biosynthesis                                                    | 1.87 | 0.333  | #NUM! | MSMO1,TM7SF2                                                                                                                                                                                       |
| B Cell Development                                                         | 1.86 | 0.109  | #NUM! | HLA-A,HLA-B,HLA-DMA,HLA-DRA,HLA-DRB1                                                                                                                                                               |
| IL-17 Signaling                                                            | 1.84 | 0.0642 | #NUM! | ATF2,CCL20,CXCL1,CXCL3,CXCL8,HSP90AA1,IL18,IL6,JAK1,LCN2,RELA,TNFSF10                                                                                                                              |
| Opioid Signaling Pathway                                                   | 1.84 | 0.0573 | #NUM! | AP2B1,ATF2,CALM1 (includes others),CDC42,CREB3,CREB5,CREBBP,CTNNB1,GNAI1,GNAI2,GNB1,NFKBIA,PDE1C,PRKAG2,PRKCI,RAC1                                                                                 |
| Ephrin A Signaling                                                         | 1.82 | 0.106  | #NUM! | CDC42,CFL1,EPHA2,RAC1,VAV3                                                                                                                                                                         |
| PXR/RXR Activation                                                         | 1.81 | 0.0923 | #NUM! | ALAS1,IL6,PPARGC1A,PRKAG2,RELA,UGT1A9 (includes others)                                                                                                                                            |
| Activation of IRF by Cytosolic Pattern Recognition Receptors               | 1.81 | 0.0923 | #NUM! | ATF2,CREBBP,IL6,NFKBIA,RELA,STAT1                                                                                                                                                                  |
| PEDF Signaling                                                             | 1.8  | 0.0833 | #NUM! | BCL2L1,CFLAR,NFKBIA,RAC1,RELA,SOD2,TP53                                                                                                                                                            |
| Apelin Muscle Signaling Pathway                                            | 1.79 | 0.104  | #NUM! | GNAI1,GNAI2,GNB1,PPARGC1A,PRKAG2                                                                                                                                                                   |
| WNT/Ca+ pathway                                                            | 1.78 | 0.0909 | #NUM! | ATF2,CREB3,CREB5,CREBBP,FZD6,RELA                                                                                                                                                                  |
| Androgen Signaling                                                         | 1.77 | 0.0651 | #NUM! | CALM1 (includes others),CCND1,CREBBP,DNAJB1,GNAI1,GNAI2,GNB1,HSP90AA1,PRKAG2,PRKCI,RELA                                                                                                            |
| PD-1, PD-L1 cancer immunotherapy pathway                                   | 1.75 | 0.0755 | #NUM! | BCL2L1,HLA-A,HLA-B,HLA-C,HLA-DMA,HLA-DRA,HLA-DRB1,JAK1                                                                                                                                             |
| Phagosome Formation                                                        | 1.74 | 0.0462 | #NUM! | ACTR2,ADORA2B,ARPC2,C3,CDC42,CFL1,CLEC4E,F2RL1,FZD6,GPR108,GPR143,GPRC5A,HMOX1,ITGA3,ITGAV,ITGB1,ITGB3,ITGB4,ITGB8,MALT1,MYD88,MYH9,MYL12A,MYL12B,MYL6,NPFFR2,PIP5K1A,PLAAT4,PRKCI,RAC1,RXFP1,VAV3 |
| Thioredoxin Pathway                                                        | 1.74 | 0.286  | #NUM! | TXN,TXNRD1                                                                                                                                                                                         |
| Glioblastoma Multiforme Signaling                                          | 1.73 | 0.0643 | #NUM! | CCND1,CCND3,CDC42,CTNNB1,FZD6,RAC1,RHOB,RHOC,RHOF,TP53,WNT7A                                                                                                                                       |
| Chronic Myeloid Leukemia Signaling                                         | 1.73 | 0.0748 | #NUM! | BCL2L1,CCND1,CCND3,CTBP2,MECOM,RELA,TGFBR2,TP53                                                                                                                                                    |
| BMP signaling pathway                                                      | 1.72 | 0.0805 | #NUM! | ATF2,BMP1,CREBBP,PRKAG2,RELA,RUNX2,SOSTDC1                                                                                                                                                         |
| Regulation Of The Epithelial Mesenchymal Transition In Development Pathway | 1.72 | 0.0805 | #NUM! | CTNNB1,FZD6,HIF1A,PSENEN,PYGO1,RELA,WNT7A                                                                                                                                                          |
| Cellular Effects of Sildenafil (Viagra)                                    | 1.71 | 0.0667 | #NUM! | ACTB,ACTG1,CALM1 (includes others),MYH9,MYL12A,MYL12B,MYL6,PDE1C,PRKAG2,SLC4A11                                                                                                                    |
| α-Adrenergic Signaling                                                     | 1.71 | 0.0741 | #NUM! | CALM1 (includes others),GNAI1,GNAI2,GNB1,GYS1,PRKAG2,PRKCI,PYGL                                                                                                                                    |
| Oxytocin In Brain Signaling Pathway                                        | 1.68 | 0.0609 | #NUM! | ATF2,CALM1 (includes others),CREB3,CREB5,CREBBP,GNAI1,GNAI2,GNB1,IL6,PLAAT4,PRKCI,PTPN1                                                                                                            |
| Immunogenic Cell Death Signaling Pathway                                   | 1.65 | 0.0778 | #NUM! | ANXA1,BCAP31,CFLAR,HSP90AA1,HSPA8,IL6,STING1                                                                                                                                                       |
| Inflammasome pathway                                                       | 1.64 | 0.15   | #NUM! | CTSB,IL18,MYD88                                                                                                                                                                                    |
| Role of MAPK Signaling in Promoting the Pathogenesis of Influenza          | 1.62 | 0.0714 | #NUM! | ATF2,ATP6V0C,ATP6V0D1,ATP6V0E1,ATP6V1E1,NFKBIA,PLAAT4,TCIRG1                                                                                                                                       |
| Superoxide Radicals Degradation                                            | 1.62 | 0.25   | #NUM! | NQO1,SOD2                                                                                                                                                                                          |
| Insulin Secretion Signaling Pathway                                        | 1.62 | 0.0551 | #NUM! | ATF2,CREB3,CREB5,CREBBP,EIF4A1,EIF4G2,JAK1,PRKAG2,PRKCI,SCNN1A,SLC2A1,SPCS3,SRP14,SRP72,STAT1                                                                                                      |
| Adipogenesis pathway                                                       | 1.59 | 0.0667 | #NUM! | CTBP2,CTNNB1,FGFR2,FZD6,HIF1A,KLF5,TP53,TXNIP,XBP1                                                                                                                                                 |



|                                                                              |      |        |       |                                                                                                                                                                             |
|------------------------------------------------------------------------------|------|--------|-------|-----------------------------------------------------------------------------------------------------------------------------------------------------------------------------|
| Senescence Pathway                                                           | 1.59 | 0.0535 | #NUM! | CALM1 (includes others),CAPN1,CAPNS1,CCND1,CCND3,CREBBP,CXCL8,DHCR24,IL6,PML,PPP2R2A,SAAL1,SOD2,STING1,TGFBR2,TP53                                                          |
| IL-4 Signaling                                                               | 1.58 | 0.0753 | #NUM! | HLA-A,HLA-B,HLA-DMA,HLA-DRA,HLA-DRB1,INPPL1,JAK1                                                                                                                            |
| HER-2 Signaling in Breast Cancer                                             | 1.58 | 0.0573 | #NUM! | ARF1,ARF4,CCND1,CDC42,ITGB1,ITGB3,ITGB4,ITGB8,NFKBIA,PRKCI,RELA,RPS6,TP53                                                                                                   |
| Ovarian Cancer Signaling                                                     | 1.58 | 0.0633 | #NUM! | CCND1,CD44,CTNNB1,FGF9,FZD6,GJA1,MMP7,PRKAG2,TP53,WNT7A                                                                                                                     |
| SNARE Signaling Pathway                                                      | 1.57 | 0.0662 | #NUM! | CALM1 (includes others),HSPA8,MYH9,MYL6,PRKAG2,RAB11A,RAB6A,RAB7A,RAB8A                                                                                                     |
| IL-12 Signaling and Production in Macrophages                                | 1.57 | 0.0662 | #NUM! | APOL1,CLU,IL18,MYD88,NFKBIA,PRKCI,RAB7A,RELA,STAT1                                                                                                                          |
| Complement System                                                            | 1.56 | 0.108  | #NUM! | C3,CD55,CD59,CFB                                                                                                                                                            |
| Th2 Pathway                                                                  | 1.56 | 0.0657 | #NUM! | HLA-A,HLA-B,HLA-DMA,HLA-DRA,HLA-DRB1,ICAM1,JAK1,PSENEN,TGFBR2                                                                                                               |
| Lymphotoxin $\beta$ Receptor Signaling                                       | 1.55 | 0.0909 | #NUM! | BCL2L1,CREBBP,CXCL1,NFKBIA,RELA                                                                                                                                             |
| Amyotrophic Lateral Sclerosis Signaling                                      | 1.54 | 0.069  | #NUM! | BCL2L1,CAPN1,CAPNS1,GPX1,RAB5A,RAB5C,RAC1,TP53                                                                                                                              |
| Bladder Cancer Signaling                                                     | 1.54 | 0.069  | #NUM! | CCND1,CXCL8,FGF18,FGF9,MMP14,MMP7,THBS1,TP53                                                                                                                                |
| Sperm Motility                                                               | 1.53 | 0.0549 | #NUM! | AXL,CALM1 (includes others),EPHA2,ERBB4,FGFR2,GNAI1,GNAI2,GNB1,JAK1,MET,PDE1C,PLAAT4,PRKAG2,PRKCI                                                                           |
| IL-17A Signaling in Fibroblasts                                              | 1.52 | 0.105  | #NUM! | IL6,LCN2,NFKBIA,RELA                                                                                                                                                        |
| CSDE1 Signaling Pathway                                                      | 1.52 | 0.0893 | #NUM! | CCND3,CTNNB1,PTBP1,RAC1,VIM                                                                                                                                                 |
| Inhibition of ARE-Mediated mRNA Degradation Pathway                          | 1.51 | 0.0617 | #NUM! | PPP2R2A,PRKAG2,PSMB2,PSMD11,SFN,TNFSF10,YWHAB,YWHAH,YWHAQ,YWHAZ                                                                                                             |
| Acetyl-CoA Biosynthesis III (from Citrate)                                   | 1.51 | 1      | #NUM! | ACLY                                                                                                                                                                        |
| Thiamin Salvage III                                                          | 1.51 | 1      | #NUM! | TPK1                                                                                                                                                                        |
| Apelin Endothelial Signaling Pathway                                         | 1.49 | 0.0638 | #NUM! | CALM1 (includes others),GNAI1,GNAI2,GNB1,HIF1A,ICAM1,PRKAG2,PRKCI,RELA                                                                                                      |
| Cholecystokinin/Gastrin-mediated Signaling                                   | 1.48 | 0.0672 | #NUM! | ATF2,CDC42,IL18,PRKCI,RAC1,RHOB,RHOC,RHOF                                                                                                                                   |
| Role of MAPK Signaling in Inhibiting the Pathogenesis of Influenza           | 1.48 | 0.0779 | #NUM! | ATF2,CXCL8,IL6,MYD88,NFKBIA,PLAAT4                                                                                                                                          |
| Breast Cancer Regulation by Stathmin1                                        | 1.48 | 0.0455 | #NUM! | ADORA2B,ATF2,CCND1,CCND3,CREB3,CREB5,CREBBP,F2RL1,FZD6,GNB1,GPR108,GP R143,GPRC5A,HIF1A,NPFFR2,PPP2R2A,PRKAG2,PRKCI,RAC1,RXFP1,TP53,TUBA1A,TUBA1B,TUBA1C,TUBA4A,TUBB,TUBB4B |
| NGF Signaling                                                                | 1.47 | 0.0667 | #NUM! | ATF2,CDC42,CREB3,CREB5,CREBBP,RAC1,RELA,TP53                                                                                                                                |
| Neuroprotective Role of THOP1 in Alzheimer's Disease                         | 1.45 | 0.0661 | #NUM! | APP,ECE1,HLA-A,HLA-B,HLA-C,KLK10,PRKAG2,TMPRSS4                                                                                                                             |
| ATM Signaling                                                                | 1.43 | 0.07   | #NUM! | ATF2,CREB3,CREB5,CREBBP,NFKBIA,PPP2R2A,TP53                                                                                                                                 |
| Aldosterone Signaling in Epithelial Cells                                    | 1.42 | 0.0595 | #NUM! | CRYAB,DNAJA1,DNAJB1,DUSP1,HSP90AA1,HSPA8,ICMT,PIP5K1A,PRKCI,SCNN1A                                                                                                          |
| PCP (Planar Cell Polarity) Pathway                                           | 1.41 | 0.0833 | #NUM! | ATF2,FZD6,PFN1,RAC1,WNT7A                                                                                                                                                   |
| Xenobiotic Metabolism Signaling                                              | 1.4  | 0.0515 | #NUM! | AHR,CHST15,CREBBP,FTL,GSTP1,HMOX1,HSP90AA1,IL6,NQO1,PPARGC1A,PPP2R2A,PRKCI,RELA,SULT1A3/SULT1A4,UGT1A9 (includes others)                                                    |
| Role of JAK family kinases in IL-6-type Cytokine Signaling                   | 1.38 | 0.12   | #NUM! | IL6,JAK1,STAT1                                                                                                                                                              |
| CDP-diacylglycerol Biosynthesis I                                            | 1.38 | 0.12   | #NUM! | GPAT4,LPCAT1,MBOAT7                                                                                                                                                         |
| Mitochondrial Dysfunction                                                    | 1.38 | 0.0585 | #NUM! | ACO1,APP,CYB5R3,GSR,NDUFS5,PSENEN,SOD2,UCP2,VDAC1,VDAC3                                                                                                                     |
| JAK/STAT Signaling                                                           | 1.37 | 0.0732 | #NUM! | BCL2L1,IL6,JAK1,PTPN1,RELA,STAT1                                                                                                                                            |
| FXR/RXR Activation                                                           | 1.36 | 0.0635 | #NUM! | APOL1,C3,CLU,CREBBP,G6PC3,IL18,PPARGC1A,SAAL1                                                                                                                               |
| Apoptosis Signaling                                                          | 1.36 | 0.0673 | #NUM! | BCL2L1,CAPN1,CAPNS1,MCL1,NFKBIA,RELA,TP53                                                                                                                                   |
| Dilated Cardiomyopathy Signaling Pathway                                     | 1.34 | 0.06   | #NUM! | ACTB,ACTG1,ATP2A2,DAG1,DSG2,MYH9,MYL6,PRKAG2,TPM1                                                                                                                           |
| Role of JAK1, JAK2 and TYK2 in Interferon Signaling                          | 1.34 | 0.115  | #NUM! | JAK1,RELA,STAT1                                                                                                                                                             |
| Corticotropin Releasing Hormone Signaling                                    | 1.33 | 0.0596 | #NUM! | ATF2,CALM1 (includes others),CREB3,CREB5,CREBBP,GNAI1,GNAI2,PRKAG2,PRKCI                                                                                                    |
| MIF Regulation of Innate Immunity                                            | 1.32 | 0.0909 | #NUM! | CD74,NFKBIA,RELA,TP53                                                                                                                                                       |
| LPS-stimulated MAPK Signaling                                                | 1.31 | 0.0706 | #NUM! | ATF2,CDC42,NFKBIA,PRKCI,RAC1,RELA                                                                                                                                           |
| PPAR Signaling                                                               | 1.3  | 0.0654 | #NUM! | CREBBP,HSP90AA1,IL18,IL1R1,NFKBIA,PPARGC1A,RELA                                                                                                                             |
| Phosphatidylglycerol Biosynthesis II (Non-plastidic)                         | 1.3  | 0.111  | #NUM! | GPAT4,LPCAT1,MBOAT7                                                                                                                                                         |
| RAR Activation                                                               | 1.26 | 0.0539 | #NUM! | ACTB,AKR1B1,AKR1C3,CREBBP,DUSP1,PML,PPARGC1A,PRKAG2,PRKCI,RAC1,RELA                                                                                                         |
| Glutathione Redox Reactions I                                                | 1.26 | 0.107  | #NUM! | GPX1,GSR,GSTP1                                                                                                                                                              |
| Role of Pattern Recognition Receptors in Recognition of Bacteria and Viruses | 1.25 | 0.0577 | #NUM! | C3,CXCL8,IL18,IL6,MYD88,PRKCI,RELA,RIPK2,TNFSF10                                                                                                                            |
| Mitotic Roles of Polo-Like Kinase                                            | 1.24 | 0.0746 | #NUM! | CAPN1,HSP90AA1,PLK1,PLK2,PPP2R2A                                                                                                                                            |
| nNOS Signaling in Neurons                                                    | 1.24 | 0.0851 | #NUM! | CALM1 (includes others),CAPN1,CAPNS1,PRKCI                                                                                                                                  |
| Oleate Biosynthesis II (Animals)                                             | 1.22 | 0.154  | #NUM! | FADS1,FADS2                                                                                                                                                                 |

|                                                                   |       |        |       |                                                                                                                                                                                                       |
|-------------------------------------------------------------------|-------|--------|-------|-------------------------------------------------------------------------------------------------------------------------------------------------------------------------------------------------------|
| Guanosine Nucleotides Degradation III                             | 1.22  | 0.154  | #NUM! | GDA,NT5E                                                                                                                                                                                              |
| Antioxidant Action of Vitamin C                                   | 1.21  | 0.0625 | #NUM! | HMOX1,NFKBIA,PLAAT4,RELA,SLC2A1,TXN,TXNRD1                                                                                                                                                            |
| D-myo-inositol (1,4,5,6)-Tetrakisphosphate Biosynthesis           | 1.21  | 0.0546 | #NUM! | DUSP1,DUSP4,DUSP5,G6PC3,INPPL1,MTMR2,NUDT4,PPP2R2A,PTPN1,SSH3                                                                                                                                         |
| D-myo-inositol (3,4,5,6)-tetrakisphosphate Biosynthesis           | 1.21  | 0.0546 | #NUM! | DUSP1,DUSP4,DUSP5,G6PC3,INPPL1,MTMR2,NUDT4,PPP2R2A,PTPN1,SSH3                                                                                                                                         |
| Asparagine Degradation I                                          | 1.21  | 0.5    | #NUM! | ASRGL1                                                                                                                                                                                                |
| Epoxysqualene Biosynthesis                                        | 1.21  | 0.5    | #NUM! | FDFT1                                                                                                                                                                                                 |
| Spermine Biosynthesis                                             | 1.21  | 0.5    | #NUM! | SMS                                                                                                                                                                                                   |
| GDP-L-fucose Biosynthesis I (from GDP-D-mannose)                  | 1.21  | 0.5    | #NUM! | GFUS                                                                                                                                                                                                  |
| Glutamine Degradation I                                           | 1.21  | 0.5    | #NUM! | GLS                                                                                                                                                                                                   |
| Unfolded protein response                                         | 1.21  | 0.0667 | #NUM! | DNAJA1,DNAJB1,HSPA8,P4HB,VCP,XBP1                                                                                                                                                                     |
| 3-phosphoinositide Biosynthesis                                   | 1.2   | 0.0526 | #NUM! | DUSP1,DUSP4,DUSP5,G6PC3,INPPL1,MTMR2,NUDT4,PIP5K1A,PPP2R2A,PTPN1,SSH3                                                                                                                                 |
| cAMP-mediated signaling                                           | 1.19  | 0.0511 | #NUM! | ADORA2B,AKAP12,ATF2,CALM1 (includes others),CREB3,CREB5,CREBBP,DUSP1,DUSP4,GNAI1,GNAI2,PDE1C                                                                                                          |
| White Adipose Tissue Browning Pathway                             | 1.17  | 0.058  | #NUM! | ATF2,CREB3,CREB5,CREBBP,CTBP2,FGFR2,PPARGC1A,PRKAG2                                                                                                                                                   |
| Mevalonate Pathway I                                              | 1.16  | 0.143  | #NUM! | ACAT2,HMGCR                                                                                                                                                                                           |
| IL-13 Signaling Pathway                                           | 1.15  | 0.0603 | #NUM! | AGR2,BCL2L1,CTNNB1,DUSP1,JAK1,STAT1,TP53                                                                                                                                                              |
| Insulin Receptor Signaling                                        | 1.14  | 0.0571 | #NUM! | ACLY,GYS1,INPPL1,JAK1,PRKAG2,PRKCI,PTPN1,SCNN1A                                                                                                                                                       |
| Melatonin Signaling                                               | 1.13  | 0.0694 | #NUM! | CALM1 (includes others),GNAI1,GNAI2,PRKAG2,PRKCI                                                                                                                                                      |
| Basal Cell Carcinoma Signaling                                    | 1.13  | 0.0694 | #NUM! | BMP1,CTNNB1,FZD6,TP53,WNT7A                                                                                                                                                                           |
| TNFR1 Signaling                                                   | 1.13  | 0.0784 | #NUM! | CDC42,NFKBIA,RELA,TNFAIP3                                                                                                                                                                             |
| Human Embryonic Stem Cell Pluripotency                            | 1.12  | 0.0542 | #NUM! | BMP1,CTNNB1,FGFR2,FZD6,GNAI1,GNAI2,GNB1,TGFB2,WNT7A                                                                                                                                                   |
| G-Protein Coupled Receptor Signaling                              | 1.12  | 0.0413 | #NUM! | ADORA2B,ATF2,CALM1 (includes others),CCND1,CDC42,CREB3,CREB5,CREBBP,CTNNB1,DUSP1,DUSP4,F2RL1,FZD6,GNAI1,GNAI2,GNB1,GPR108,GPR143,GPRC5A,MYL12A,MYL12B,MYL6,NFKBIA,NPFFR2,PDE1C,PRKAG2,RAC1,RELA,RXFP1 |
| Hepatic Cholestasis                                               | 1.12  | 0.0524 | #NUM! | CXCL8,IL18,IL1R1,IL6,MYD88,NFKBIA,PRKAG2,PRKCI,RELA,TNFSF10                                                                                                                                           |
| Hereditary Breast Cancer Signaling                                | 1.12  | 0.0563 | #NUM! | ACTB,CCND1,CCND3,CREBBP,SFN,TP53,UBB,UBC                                                                                                                                                              |
| TNFR2 Signaling                                                   | 1.12  | 0.0938 | #NUM! | NFKBIA,RELA,TNFAIP3                                                                                                                                                                                   |
| Xenobiotic Metabolism General Signaling Pathway                   | 1.1   | 0.0559 | #NUM! | AHR,CREBBP,FTL,GSTP1,HMOX1,NQO1,PRKCI,UGT1A9 (includes others)                                                                                                                                        |
| Small Cell Lung Cancer Signaling                                  | 1.1   | 0.0625 | #NUM! | BCL2L1,CCND1,CCND3,NFKBIA,RELA,TP53                                                                                                                                                                   |
| Sphingosine-1-phosphate Signaling                                 | 1.09  | 0.0583 | #NUM! | CDC42,GNAI1,GNAI2,RAC1,RHOB,RHOC,RHOF                                                                                                                                                                 |
| 3-phosphoinositide Degradation                                    | 1.07  | 0.0513 | #NUM! | DUSP1,DUSP4,DUSP5,G6PC3,INPPL1,MTMR2,NUDT4,PPP2R2A,PTPN1,SSH3                                                                                                                                         |
| Extrinsic Prothrombin Activation Pathway                          | 1.06  | 0.125  | #NUM! | F3,TFPI                                                                                                                                                                                               |
| D-myo-inositol (1,4,5)-trisphosphate Degradation                  | 1.06  | 0.125  | #NUM! | BPNT2,INPPL1                                                                                                                                                                                          |
| Role of Cytokines in Mediating Communication between Immune Cells | 1.06  | 0.0741 | #NUM! | CXCL8,IL18,IL32,IL6                                                                                                                                                                                   |
| 4-1BB Signaling in T Lymphocytes                                  | 1.05  | 0.0882 | #NUM! | ATF2,NFKBIA,RELA                                                                                                                                                                                      |
| Role of JAK2 in Hormone-like Cytokine Signaling                   | 1.05  | 0.0882 | #NUM! | JAK1,PTPN1,STAT1                                                                                                                                                                                      |
| NADH Repair                                                       | 1.04  | 0.333  | #NUM! | GAPDH                                                                                                                                                                                                 |
| Serine Biosynthesis                                               | 1.04  | 0.333  | #NUM! | PSAT1                                                                                                                                                                                                 |
| 1,25-dihydroxyvitamin D3 Biosynthesis                             | 1.04  | 0.333  | #NUM! | POR                                                                                                                                                                                                   |
| Hypusine Biosynthesis                                             | 1.04  | 0.333  | #NUM! | EIF5A                                                                                                                                                                                                 |
| D-myo-inositol-5-phosphate Metabolism                             | 1.03  | 0.0503 | #NUM! | DUSP1,DUSP4,DUSP5,G6PC3,INPPL1,MTMR2,NUDT4,PPP2R2A,PTPN1,SSH3                                                                                                                                         |
| Coagulation System                                                | 1.02  | 0.0857 | #NUM! | F3,PLAU,TFPI                                                                                                                                                                                          |
| IL-9 Signaling                                                    | 1.02  | 0.0857 | #NUM! | JAK1,RELA,STAT1                                                                                                                                                                                       |
| VDR/RXR Activation                                                | 1.02  | 0.0641 | #NUM! | CALB1,PRKCI,RUNX2,SERPINB1,SPP1                                                                                                                                                                       |
| Neurotrophin/TRK Signaling                                        | 1.02  | 0.0641 | #NUM! | ATF2,CDC42,CREB3,CREB5,CREBBP                                                                                                                                                                         |
| RAN Signaling                                                     | 1.01  | 0.118  | #NUM! | KPNA2,RAN                                                                                                                                                                                             |
| Maturity Onset Diabetes of Young (MODY) Signaling                 | 1     | 0.0633 | #NUM! | APOL1,APOL2,CREBBP,GAPDH,UCP2                                                                                                                                                                         |
| MIF-mediated Glucocorticoid Regulation                            | 0.996 | 0.0833 | #NUM! | CD74,NFKBIA,RELA                                                                                                                                                                                      |
| Role of BRCA1 in DNA Damage Response                              | 0.983 | 0.0625 | #NUM! | ACTB,BABAM2,PLK1,STAT1,TP53                                                                                                                                                                           |

|                                                                                                       |       |        |       |                                                                                                                                                     |
|-------------------------------------------------------------------------------------------------------|-------|--------|-------|-----------------------------------------------------------------------------------------------------------------------------------------------------|
| Mouse Embryonic Stem Cell Pluripotency                                                                | 0.975 | 0.0577 | #NUM! | CREBBP,CTNNB1,FZD6,ID2,JAK1,TP53                                                                                                                    |
| IL-6 Signaling                                                                                        | 0.975 | 0.0547 | #NUM! | CXCL8,IL18,IL1R1,IL6,MCL1,NFKBIA,RELA                                                                                                               |
| Role of CHK Proteins in Cell Cycle Checkpoint Control                                                 | 0.971 | 0.069  | #NUM! | PCNA,PLK1,PPP2R2A,TP53                                                                                                                              |
| TWEAK Signaling                                                                                       | 0.971 | 0.0811 | #NUM! | NFKBIA,RELA,TNFRSF12A                                                                                                                               |
| MSP-RON Signaling Pathway                                                                             | 0.971 | 0.069  | #NUM! | ACTB,ACTG1,CSF1,KLK10                                                                                                                               |
| Differential Regulation of Cytokine Production in Macrophages and T Helper Cells by IL-17A and IL-17F | 0.971 | 0.111  | #NUM! | CXCL1,IL6                                                                                                                                           |
| Superpathway of Geranylgeranyldiphosphate Biosynthesis I (via Mevalonate)                             | 0.971 | 0.111  | #NUM! | ACAT2,HMGCR                                                                                                                                         |
| Relaxin Signaling                                                                                     | 0.951 | 0.0516 | #NUM! | GNAI1,GNAI2,GNB1,NFKBIA,PDE1C,PRKAG2,RELA,RXFP1                                                                                                     |
| FLT3 Signaling in Hematopoietic Progenitor Cells                                                      | 0.947 | 0.061  | #NUM! | ATF2,CREB3,CREB5,CREBBP,STAT1                                                                                                                       |
| Synaptic Long Term Potentiation                                                                       | 0.939 | 0.0534 | #NUM! | ATF2,CALM1 (includes others),CREB3,CREB5,CREBBP,PRKAG2,PRKCI                                                                                        |
| Purine Nucleotides Degradation II (Aerobic)                                                           | 0.932 | 0.105  | #NUM! | GDA,NT5E                                                                                                                                            |
| DNA damage-induced 14-3-3σ Signaling                                                                  | 0.932 | 0.105  | #NUM! | SFN,TP53                                                                                                                                            |
| SPINK1 Pancreatic Cancer Pathway                                                                      | 0.932 | 0.0667 | #NUM! | CTSB,F2RL1,KLK10,TGFB2                                                                                                                              |
| Heme Degradation                                                                                      | 0.924 | 0.25   | #NUM! | HMOX1                                                                                                                                               |
| Spermine and Spermidine Degradation I                                                                 | 0.924 | 0.25   | #NUM! | SAT1                                                                                                                                                |
| CCR3 Signaling in Eosinophils                                                                         | 0.9   | 0.0522 | #NUM! | CALM1 (includes others),CFL1,GNAI1,GNAI2,GNB1,PRKCI,RAC1                                                                                            |
| Cyclins and Cell Cycle Regulation                                                                     | 0.9   | 0.0588 | #NUM! | CCNA2,CCND1,CCND3,PPP2R2A,TP53                                                                                                                      |
| Superpathway of Inositol Phosphate Compounds                                                          | 0.9   | 0.0462 | #NUM! | DUSP1,DUSP4,DUSP5,G6PC3,INPPL1,MTMR2,NUDT4,PIP5K1A,PPP2R2A,PTPN1,SSH3                                                                               |
| Mechanisms of Viral Exit from Host Cells                                                              | 0.87  | 0.0732 | #NUM! | ACTB,ACTG1,PRKCI                                                                                                                                    |
| CDC42 Signaling                                                                                       | 0.863 | 0.0399 | #NUM! | ACTR2,ARPC2,ATF2,CDC42,CDC42SE1,CFL1,HLA-A,HLA-B,HLA-C,HLA-DMA,HLA-DRA,HLA-DRB1,IQGAP1,ITGA3,ITGAV,ITGB1,ITGB3,ITGB4,ITGB8,MYL12A,MYL12B,MYL6,PRKCI |
| Androgen Biosynthesis                                                                                 | 0.86  | 0.0952 | #NUM! | AKR1C3,SRD5A3                                                                                                                                       |
| TEC Kinase Signaling                                                                                  | 0.857 | 0.0398 | #NUM! | ACTB,ACTG1,CDC42,GNAI1,GNAI2,GNB1,ITGA3,ITGAV,ITGB1,ITGB3,ITGB4,ITGB8,JAK1,PRKCI,RAC1,RELA,RHOB,RHOC,RHOF,STAT1,TNFRSF21,TNFSF10,VAV3               |
| Induction of Apoptosis by HIV1                                                                        | 0.842 | 0.0615 | #NUM! | BCL2L1,NFKBIA,RELA,TP53                                                                                                                             |
| Xenobiotic Metabolism CAR Signaling Pathway                                                           | 0.842 | 0.0471 | #NUM! | CHST15,CREBBP,GSTP1,HSP90AA1,PPARGC1A,PPP2R2A,PRKCI,SULT1A3/SULT1A4,UGT1A9 (includes others)                                                        |
| Creatine-phosphate Biosynthesis                                                                       | 0.836 | 0.2    | #NUM! | CKMT1A/CKMT1B                                                                                                                                       |
| Pentose Phosphate Pathway (Oxidative Branch)                                                          | 0.836 | 0.2    | #NUM! | PGD                                                                                                                                                 |
| Superpathway of Serine and Glycine Biosynthesis I                                                     | 0.836 | 0.2    | #NUM! | PSAT1                                                                                                                                               |
| Tetrapyrrole Biosynthesis II                                                                          | 0.836 | 0.2    | #NUM! | ALAS1                                                                                                                                               |
| Myo-inositol Biosynthesis                                                                             | 0.836 | 0.2    | #NUM! | BPNT2                                                                                                                                               |
| dTMP De Novo Biosynthesis                                                                             | 0.836 | 0.2    | #NUM! | TYMS                                                                                                                                                |
| Tyrosine Degradation I                                                                                | 0.836 | 0.2    | #NUM! | HGD                                                                                                                                                 |
| Acetate Conversion to Acetyl-CoA                                                                      | 0.836 | 0.2    | #NUM! | ACSL1                                                                                                                                               |
| Xenobiotic Metabolism PXR Signaling Pathway                                                           | 0.833 | 0.0469 | #NUM! | CHST15,CREBBP,GSTP1,HSP90AA1,PPARGC1A,PRKAG2,PRKCI,SULT1A3/SULT1A4,UGT1A9 (includes others)                                                         |
| Oncostatin M Signaling                                                                                | 0.827 | 0.0698 | #NUM! | JAK1,PLAU,STAT1                                                                                                                                     |
| Superpathway of D-myo-inositol (1,4,5)-trisphosphate Metabolism                                       | 0.827 | 0.0909 | #NUM! | BPNT2,INPPL1                                                                                                                                        |
| Role of PI3K/AKT Signaling in the Pathogenesis of Influenza                                           | 0.824 | 0.0606 | #NUM! | GNAI1,GNAI2,NFKBIA,RELA                                                                                                                             |
| Glutamate Receptor Signaling                                                                          | 0.824 | 0.0606 | #NUM! | CALM1 (includes others),GLS,GNB1,SLC1A1                                                                                                             |
| CD40 Signaling                                                                                        | 0.807 | 0.0597 | #NUM! | ICAM1,NFKBIA,RELA,TNFAIP3                                                                                                                           |
| PPARα/RXRα Activation                                                                                 | 0.804 | 0.0462 | #NUM! | CREBBP,HSP90AA1,IL1R1,IL6,NFKBIA,PPARGC1A,PRKAG2,RELA,TGFB2                                                                                         |
| G Protein Signaling Mediated by Tubby                                                                 | 0.804 | 0.0682 | #NUM! | GNAI1,GNAI2,GNB1                                                                                                                                    |
| BER (Base Excision Repair) Pathway                                                                    | 0.804 | 0.0682 | #NUM! | ARL6IP5,PCNA,TP53                                                                                                                                   |
| Differential Regulation of Cytokine Production in Intestinal Epithelial Cells by IL-17A and IL-17F    | 0.796 | 0.087  | #NUM! | CXCL1,LCN2                                                                                                                                          |
| Pyrimidine Deoxyribonucleotides De Novo Biosynthesis I                                                | 0.796 | 0.087  | #NUM! | CMPK1,TYMS                                                                                                                                          |
| Apelin Cardiac Fibroblast Signaling Pathway                                                           | 0.796 | 0.087  | #NUM! | IL6,PRKAG2                                                                                                                                          |
| Cell Cycle: G1/S Checkpoint Regulation                                                                | 0.79  | 0.0588 | #NUM! | CCND1,CCND3,RPL5,TP53                                                                                                                               |
| Pyroptosis Signaling Pathway                                                                          | 0.783 | 0.0538 | #NUM! | GBP2,IL18,IL1R1,PRKAG2,TXNIP                                                                                                                        |

|                                                                      |       |        |       |                                                                                                                                                             |
|----------------------------------------------------------------------|-------|--------|-------|-------------------------------------------------------------------------------------------------------------------------------------------------------------|
| Estrogen Biosynthesis                                                | 0.783 | 0.0667 | #NUM! | AKR1C3,HSD17B12,POR                                                                                                                                         |
| IL-22 Signaling                                                      | 0.767 | 0.0833 | #NUM! | JAK1,STAT1                                                                                                                                                  |
| Role of RIG1-like Receptors in Antiviral Innate Immunity             | 0.764 | 0.0652 | #NUM! | CREBBP,NFKBIA,RELA                                                                                                                                          |
| Role of NANOG in Mammalian Embryonic Stem Cell Pluripotency          | 0.764 | 0.05   | #NUM! | BMP1,CTNNB1,FZD6,JAK1,TP53,WNT7A                                                                                                                            |
| Nitric Oxide Signaling in the Cardiovascular System                  | 0.764 | 0.05   | #NUM! | ATP2A2,CALM1 (includes others),HSP90AA1,PDE1C,PRKAG2,PRKCI                                                                                                  |
| IL-23 Signaling Pathway                                              | 0.764 | 0.0652 | #NUM! | HIF1A,NFKBIA,RELA                                                                                                                                           |
| Glycine Cleavage Complex                                             | 0.762 | 0.167  | #NUM! | GLDC                                                                                                                                                        |
| Rapaport-Luebering Glycolytic Shunt                                  | 0.762 | 0.167  | #NUM! | PGAM1                                                                                                                                                       |
| Renin-Angiotensin Signaling                                          | 0.752 | 0.0496 | #NUM! | ATF2,PRKAG2,PRKCI,RAC1,RELA,STAT1                                                                                                                           |
| TGF- $\beta$ Signaling                                               | 0.745 | 0.0521 | #NUM! | CDC42,CREBBP,RUNX2,TGFBR2,TGIF1                                                                                                                             |
| Melanocyte Development and Pigmentation Signaling                    | 0.719 | 0.051  | #NUM! | ATF2,CREB3,CREB5,CREBBP,PRKAG2                                                                                                                              |
| Estrogen-mediated S-phase Entry                                      | 0.712 | 0.0769 | #NUM! | CCNA2,CCND1                                                                                                                                                 |
| Ceramide Biosynthesis                                                | 0.701 | 0.143  | #NUM! | SPTLC3                                                                                                                                                      |
| Glycogen Biosynthesis II (from UDP-D-Glucose)                        | 0.701 | 0.143  | #NUM! | GYS1                                                                                                                                                        |
| Cardiac $\beta$ -adrenergic Signaling                                | 0.697 | 0.0444 | #NUM! | AKAP12,ATP2A2,GNAI1,GNAI2,GNB1,PDE1C,PPP2R2A,PRKAG2                                                                                                         |
| G Beta Gamma Signaling                                               | 0.668 | 0.0465 | #NUM! | CDC42,GNAI1,GNAI2,GNB1,PRKAG2,PRKCI                                                                                                                         |
| Circadian Rhythm Signaling                                           | 0.666 | 0.041  | #NUM! | ATF2,CREB3,CREB5,CREBBP,CSNK1D,GNAI1,GNAI2,GNB1,HIF1A,PRKAG2,PRKCI                                                                                          |
| Role of WNT/GSK-3 $\beta$ Signaling in the Pathogenesis of Influenza | 0.648 | 0.0513 | #NUM! | CSNK1D,CTNNB1,FZD6,WNT7A                                                                                                                                    |
| MicroRNA Biogenesis Signaling Pathway                                | 0.64  | 0.0428 | #NUM! | DDX17,DNAJB1,HMOX1,HNRNPA1,HSP90AA1,HSPA8,RAN,TP53                                                                                                          |
| GABA Receptor Signaling                                              | 0.638 | 0.0455 | #NUM! | AP2B1,GNAI1,GNAI2,GNB1,UBB,UBC                                                                                                                              |
| IL-3 Signaling                                                       | 0.635 | 0.0506 | #NUM! | JAK1,PRKCI,RAC1,STAT1                                                                                                                                       |
| Thyroid Cancer Signaling                                             | 0.635 | 0.0506 | #NUM! | CCND1,CTNNB1,CXCL8,TP53                                                                                                                                     |
| Chemokine Signaling                                                  | 0.622 | 0.05   | #NUM! | CALM1 (includes others),CFL1,GNAI1,GNAI2                                                                                                                    |
| Role of p14/p19ARF in Tumor Suppression                              | 0.62  | 0.0667 | #NUM! | RAC1,TP53                                                                                                                                                   |
| Citrulline Biosynthesis                                              | 0.606 | 0.111  | #NUM! | GLS                                                                                                                                                         |
| Heme Biosynthesis II                                                 | 0.606 | 0.111  | #NUM! | ALAS1                                                                                                                                                       |
| FAT10 Signaling Pathway                                              | 0.597 | 0.0536 | #NUM! | MAP1LC3B,PSMB2,PSMD11                                                                                                                                       |
| Role of NFAT in Cardiac Hypertrophy                                  | 0.59  | 0.0405 | #NUM! | CALM1 (includes others),GNAI1,GNAI2,GNB1,IL6,PRKAG2,PRKCI,RCAN2,TGFBR2                                                                                      |
| CD27 Signaling in Lymphocytes                                        | 0.582 | 0.0526 | #NUM! | BCL2L1,NFKBIA,RELA                                                                                                                                          |
| Methylglyoxal Degradation III                                        | 0.58  | 0.0625 | #NUM! | AKR1B1,AKR1C3                                                                                                                                               |
| LPS/IL-1 Mediated Inhibition of RXR Function                         | 0.569 | 0.0394 | #NUM! | ABCC4,ACSL1,ALAS1,CHST15,GSTP1,IL18,IL1R1,MYD88,PPARGC1A,SULT1A3/SULT1A4                                                                                    |
| Ketolysis                                                            | 0.567 | 0.1    | #NUM! | ACAT2                                                                                                                                                       |
| Airway Inflammation in Asthma                                        | 0.561 | 0.0606 | #NUM! | CCL20,CXCL8                                                                                                                                                 |
| Endometrial Cancer Signaling                                         | 0.542 | 0.05   | #NUM! | CCND1,CTNNB1,TP53                                                                                                                                           |
| Retinoic acid Mediated Apoptosis Signaling                           | 0.542 | 0.05   | #NUM! | CFLAR,PARP14,TNFSF10                                                                                                                                        |
| Ketogenesis                                                          | 0.532 | 0.0909 | #NUM! | ACAT2                                                                                                                                                       |
| Dolichyl-diphosphooligosaccharide Biosynthesis                       | 0.532 | 0.0909 | #NUM! | ALG3                                                                                                                                                        |
| Ethanol Degradation II                                               | 0.526 | 0.0571 | #NUM! | ACSL1,ADH6                                                                                                                                                  |
| Phospholipase C Signaling                                            | 0.524 | 0.0352 | #NUM! | ATF2,CALM1 (includes others),CDC42,CREB3,CREB5,CREBBP,GNB1,HMOX1,ITGA3,ITGAV,ITGB1,ITGB3,ITGB4,ITGB8,MYL12A,MYL12B,MYL6,PRKCI,RAC1,RELA,RHOB,RHOC,RHOF,TGM2 |
| Melatonin Degradation I                                              | 0.516 | 0.0484 | #NUM! | POR,SULT1A3/SULT1A4,UGT1A9 (includes others)                                                                                                                |
| Acute Myeloid Leukemia Signaling                                     | 0.502 | 0.044  | #NUM! | CCND1,JUP,PML,RELA                                                                                                                                          |
| Hematopoiesis from Multipotent Stem Cells                            | 0.5   | 0.0833 | #NUM! | CSF1                                                                                                                                                        |
| Docosahexaenoic Acid (DHA) Signaling                                 | 0.478 | 0.0526 | #NUM! | APP,BCL2L1                                                                                                                                                  |
| Cell Cycle Regulation by BTG Family Proteins                         | 0.478 | 0.0526 | #NUM! | CCND1,PPP2R2A                                                                                                                                               |
| Glycogen Degradation II                                              | 0.472 | 0.0769 | #NUM! | PYGL                                                                                                                                                        |
| Type II Diabetes Mellitus Signaling                                  | 0.466 | 0.0392 | #NUM! | ACSL1,NFKBIA,PKM,PRKAG2,PRKCI,RELA                                                                                                                          |
| Glioma Signaling                                                     | 0.463 | 0.0403 | #NUM! | CALM1 (includes others),CCND1,CCND3,PRKCI,TP53                                                                                                              |

|                                                                                 |       |        |       |                                                                                                                                                 |
|---------------------------------------------------------------------------------|-------|--------|-------|-------------------------------------------------------------------------------------------------------------------------------------------------|
| Superpathway of Melatonin Degradation                                           | 0.46  | 0.0448 | #NUM! | POR,SULT1A3/SULT1A4,UGT1A9 (includes others)                                                                                                    |
| Thyroid Hormone Metabolism II (via Conjugation and/or Degradation)              | 0.45  | 0.05   | #NUM! | SULT1A3/SULT1A4,UGT1A9 (includes others)                                                                                                        |
| ERBB4 Signaling                                                                 | 0.449 | 0.0441 | #NUM! | ERBB4,PRKCI,PSENEN                                                                                                                              |
| Acyl-CoA Hydrolysis                                                             | 0.446 | 0.0714 | #NUM! | ACOT7                                                                                                                                           |
| Urate Biosynthesis/Inosine 5'-phosphate Degradation                             | 0.446 | 0.0714 | #NUM! | NT5E                                                                                                                                            |
| Colanic Acid Building Blocks Biosynthesis                                       | 0.446 | 0.0714 | #NUM! | GFUS                                                                                                                                            |
| eNOS Signaling                                                                  | 0.445 | 0.0385 | #NUM! | CALM1 (includes others),CCNA2,HSP90AA1,HSPA8,PRKAG2,PRKCI                                                                                       |
| UVA-Induced MAPK Signaling                                                      | 0.438 | 0.0408 | #NUM! | BCL2L1,PARP14,STAT1,TP53                                                                                                                        |
| GM-CSF Signaling                                                                | 0.428 | 0.0429 | #NUM! | BCL2L1,CCND1,STAT1                                                                                                                              |
| April Mediated Signaling                                                        | 0.423 | 0.0476 | #NUM! | NFKBIA,RELA                                                                                                                                     |
| Telomere Extension by Telomerase                                                | 0.423 | 0.0667 | #NUM! | HNRNPA1                                                                                                                                         |
| Fatty Acid Activation                                                           | 0.423 | 0.0667 | #NUM! | ACSL1                                                                                                                                           |
| Retinoate Biosynthesis I                                                        | 0.423 | 0.0476 | #NUM! | AKR1B1,AKR1C3                                                                                                                                   |
| Superpathway of Citrulline Metabolism                                           | 0.423 | 0.0667 | #NUM! | GLS                                                                                                                                             |
| Choline Biosynthesis III                                                        | 0.423 | 0.0667 | #NUM! | HMOX1                                                                                                                                           |
| Glycogen Degradation III                                                        | 0.423 | 0.0667 | #NUM! | PYGL                                                                                                                                            |
| Serotonin Degradation                                                           | 0.418 | 0.0423 | #NUM! | ADH6,SULT1A3/SULT1A4,UGT1A9 (includes others)                                                                                                   |
| B Cell Activating Factor Signaling                                              | 0.41  | 0.0465 | #NUM! | NFKBIA,RELA                                                                                                                                     |
| Adenosine Nucleotides Degradation II                                            | 0.401 | 0.0625 | #NUM! | NT5E                                                                                                                                            |
| Parkinson's Signaling                                                           | 0.401 | 0.0625 | #NUM! | UCHL1                                                                                                                                           |
| GPCR-Mediated Integration of Enteroendocrine Signaling Exemplified by an L Cell | 0.382 | 0.04   | #NUM! | GNAI1,GNAI2,PRKAG2                                                                                                                              |
| 1D-myo-inositol Hexakisphosphate Biosynthesis II (Mammalian)                    | 0.381 | 0.0588 | #NUM! | INPPL1                                                                                                                                          |
| D-myo-inositol (1,3,4)-trisphosphate Biosynthesis                               | 0.381 | 0.0588 | #NUM! | INPPL1                                                                                                                                          |
| Role of OCT4 in Mammalian Embryonic Stem Cell Pluripotency                      | 0.375 | 0.0435 | #NUM! | SPP1,TP53                                                                                                                                       |
| Apelin Pancreas Signaling Pathway                                               | 0.375 | 0.0435 | #NUM! | PRKAG2,RELA                                                                                                                                     |
| CREB Signaling in Neurons                                                       | 0.369 | 0.033  | #NUM! | ADORA2B,ATF2,CALM1 (includes others),CREB3,CREB5,CREBBP,F2RL1,FGFR2,FZD6,GNAI1,GNAI2,GNB1,GPR108,GPR143,GPRC5A,NPFFR2,PRKAG2,PRKCI,RXFP1,TGFBR2 |
| Dermatan Sulfate Biosynthesis (Late Stages)                                     | 0.364 | 0.0426 | #NUM! | CHST15,SULT1A3/SULT1A4                                                                                                                          |
| Mismatch Repair in Eukaryotes                                                   | 0.363 | 0.0556 | #NUM! | PCNA                                                                                                                                            |
| Isoleucine Degradation I                                                        | 0.363 | 0.0556 | #NUM! | ACAT2                                                                                                                                           |
| Bile Acid Biosynthesis, Neutral Pathway                                         | 0.363 | 0.0556 | #NUM! | AKR1C3                                                                                                                                          |
| nNOS Signaling in Skeletal Muscle Cells                                         | 0.354 | 0.0417 | #NUM! | CALM1 (includes others),DAG1                                                                                                                    |
| Systemic Lupus Erythematosus In T Cell Signaling Pathway                        | 0.35  | 0.0326 | #NUM! | ATF2,CD44,CDC42,CREB3,CREB5,CREBBP,EZR,GNAI1,GNAI2,HLA-A,HLA-B,HLA-C,HLA-DMA,HLA-DRA,HLA-DRB1,IL6,PPP2R2A,RAC1,RHOB,RHOC,RHOF                   |
| Glutaryl-CoA Degradation                                                        | 0.345 | 0.0526 | #NUM! | ACAT2                                                                                                                                           |
| Mitochondrial L-carnitine Shuttle Pathway                                       | 0.345 | 0.0526 | #NUM! | ACSL1                                                                                                                                           |
| Spliceosomal Cycle                                                              | 0.343 | 0.0408 | #NUM! | HSPA8,SF3B4                                                                                                                                     |
| Melanoma Signaling                                                              | 0.333 | 0.04   | #NUM! | CCND1,TP53                                                                                                                                      |
| Chondroitin Sulfate Biosynthesis (Late Stages)                                  | 0.333 | 0.04   | #NUM! | CHST15,SULT1A3/SULT1A4                                                                                                                          |
| UVC-Induced MAPK Signaling                                                      | 0.323 | 0.0392 | #NUM! | PRKCI,TP53                                                                                                                                      |
| UVB-Induced MAPK Signaling                                                      | 0.314 | 0.0385 | #NUM! | PRKCI,TP53                                                                                                                                      |
| Endoplasmic Reticulum Stress Pathway                                            | 0.313 | 0.0476 | #NUM! | XBP1                                                                                                                                            |
| Dendritic Cell Maturation                                                       | 0.308 | 0.0319 | #NUM! | ATF2,CREB3,CREB5,CREBBP,FSCN1,HLA-A,HLA-B,HLA-C,HLA-DMA,HLA-DRA,HLA-DRB1,ICAM1,IL18,IL32,IL6,MYD88,NFKBIA,RELA,STAT1                            |
| Endocannabinoid Neuronal Synapse Pathway                                        | 0.304 | 0.0336 | #NUM! | GNAI1,GNAI2,GNB1,MGLL,PRKAG2                                                                                                                    |
| Putrescine Degradation III                                                      | 0.299 | 0.0455 | #NUM! | SAT1                                                                                                                                            |
| Fc Epsilon RI Signaling                                                         | 0.298 | 0.0339 | #NUM! | INPPL1,PRKCI,RAC1,VAV3                                                                                                                          |
| PDGF Signaling                                                                  | 0.298 | 0.0349 | #NUM! | INPPL1,JAK1,STAT1                                                                                                                               |
| GPCR-Mediated Nutrient Sensing in Enteroendocrine Cells                         | 0.298 | 0.0339 | #NUM! | GNAI1,GNAI2,PRKAG2,PRKCI                                                                                                                        |
| Phototransduction Pathway                                                       | 0.297 | 0.037  | #NUM! | GNB1,PRKAG2                                                                                                                                     |

|                                                           |       |         |       |                                                                                                                   |
|-----------------------------------------------------------|-------|---------|-------|-------------------------------------------------------------------------------------------------------------------|
| EGF Signaling                                             | 0.288 | 0.0364  | #NUM! | JAK1,STAT1                                                                                                        |
| Cardiomyocyte Differentiation via BMP Receptors           | 0.287 | 0.0435  | #NUM! | ATF2                                                                                                              |
| The Visual Cycle                                          | 0.287 | 0.0435  | #NUM! | AKR1C3                                                                                                            |
| TCA Cycle II (Eukaryotic)                                 | 0.287 | 0.0435  | #NUM! | ACO1                                                                                                              |
| Tumoricidal Function of Hepatic Natural Killer Cells      | 0.274 | 0.0417  | #NUM! | ICAM1                                                                                                             |
| CNTF Signaling                                            | 0.272 | 0.0351  | #NUM! | JAK1,STAT1                                                                                                        |
| Prolactin Signaling                                       | 0.266 | 0.033   | #NUM! | CREBBP,PRKCI,STAT1                                                                                                |
| RANK Signaling in Osteoclasts                             | 0.266 | 0.033   | #NUM! | CALM1 (includes others),NFKBIA,RELA                                                                               |
| Nicotine Degradation III                                  | 0.265 | 0.0345  | #NUM! | POR,UGT1A9 (includes others)                                                                                      |
| Chondroitin Sulfate Biosynthesis                          | 0.265 | 0.0345  | #NUM! | CHST15,SULT1A3/SULT1A4                                                                                            |
| Bupropion Degradation                                     | 0.262 | 0.04    | #NUM! | POR                                                                                                               |
| Ethanol Degradation IV                                    | 0.262 | 0.04    | #NUM! | ACSL1                                                                                                             |
| Triacylglycerol Degradation                               | 0.257 | 0.0339  | #NUM! | ABHD2,MGLL                                                                                                        |
| Endothelin-1 Signaling                                    | 0.256 | 0.0312  | #NUM! | ECE1,GNAI1,GNAI2,HMOX1,PLAAT4,PRKCI                                                                               |
| ERBB Signaling                                            | 0.254 | 0.0323  | #NUM! | CDC42,ERBB4,PRKCI                                                                                                 |
| D-myo-inositol (1,4,5)-Trisphosphate Biosynthesis         | 0.251 | 0.0385  | #NUM! | PIP5K1A                                                                                                           |
| Tryptophan Degradation III (Eukaryotic)                   | 0.251 | 0.0385  | #NUM! | ACAT2                                                                                                             |
| Dermatan Sulfate Biosynthesis                             | 0.25  | 0.0333  | #NUM! | CHST15,SULT1A3/SULT1A4                                                                                            |
| Non-Small Cell Lung Cancer Signaling                      | 0.249 | 0.0319  | #NUM! | CCND1,CCND3,TP53                                                                                                  |
| NAD Salvage Pathway II                                    | 0.24  | 0.037   | #NUM! | NT5E                                                                                                              |
| Pregnenolone Biosynthesis                                 | 0.24  | 0.037   | #NUM! | MICAL2                                                                                                            |
| Thrombopoietin Signaling                                  | 0.231 | 0.0317  | #NUM! | PRKCI,STAT1                                                                                                       |
| Histidine Degradation VI                                  | 0.231 | 0.0357  | #NUM! | MICAL2                                                                                                            |
| Sonic Hedgehog Signaling                                  | 0.221 | 0.0345  | #NUM! | PRKAG2                                                                                                            |
| Ubiquinol-10 Biosynthesis (Eukaryotic)                    | 0.204 | 0.0323  | #NUM! | MICAL2                                                                                                            |
| Dopamine Degradation                                      | 0.196 | 0.0312  | #NUM! | SULT1A3/SULT1A4                                                                                                   |
| Neurovascular Coupling Signaling Pathway                  | 0     | 0.031   | #NUM! | ADORA2B,APP,CALM1 (includes others),GJA1,KCNJ16,PLAAT4,PRKAG2                                                     |
| Synaptic Long Term Depression                             | 0     | 0.0255  | #NUM! | GNAI1,GNAI2,PLAAT4,PPP2R2A,PRKCI                                                                                  |
| Ceramide Signaling                                        | 0     | 0.022   | #NUM! | PPP2R2A,RELA                                                                                                      |
| Role of NFAT in Regulation of the Immune Response         | 0     | 0.0254  | #NUM! | ATF2,CALM1 (includes others),CSNK1D,GNAI1,GNAI2,GNB1,HLA-A,HLA-B,HLA-DMA,HLA-DRA,HLA-DRB1,KPNA2,NFKBIA,RCAN2,RELA |
| CCR5 Signaling in Macrophages                             | 0     | 0.01    | #NUM! | CALM1 (includes others),GNAI1,GNAI2,GNB1,PRKCI                                                                    |
| Calcium-induced T Lymphocyte Apoptosis                    | 0     | 0.0174  | #NUM! | ATP2A2,CALM1 (includes others),HLA-A,HLA-B,HLA-DMA,HLA-DRA,HLA-DRB1,PRKCI                                         |
| Cytotoxic T Lymphocyte-mediated Apoptosis of Target Cells | 0     | 0.00706 | #NUM! | HLA-A,HLA-B,HLA-C                                                                                                 |
| CTLA4 Signaling in Cytotoxic T Lymphocytes                | 0     | 0.028   | #NUM! | AHR,AP2B1,ARF1,BCL2L1,HLA-A,HLA-B,HLA-C,HLA-DMA,HLA-DRA,HLA-DRB1,HMOX1,ITGA3,ITGB1,MALT1,PPP2R2A,RAC1,VAV3        |
| T Helper Cell Differentiation                             | 0     | 0.0191  | #NUM! | HLA-A,HLA-B,HLA-DMA,HLA-DRA,HLA-DRB1,IL18,IL6,STAT1,TGFBR2                                                        |
| CD28 Signaling in T Helper Cells                          | 0     | 0.0251  | #NUM! | ACTR2,ARPC2,CALM1 (includes others),CDC42,HLA-A,HLA-B,HLA-DMA,HLA-DRA,HLA-DRB1,MALT1,NFKBIA,RAC1,RELA             |
| IL-15 Signaling                                           | 0     | 0.00756 | #NUM! | BCL2L1,CXCL8,JAK1,RELA                                                                                            |
| Angiopoietin Signaling                                    | 0     | 0.0263  | #NUM! | NFKBIA,RELA                                                                                                       |
| Neuropathic Pain Signaling In Dorsal Horn Neurons         | 0     | 0.0198  | #NUM! | PRKAG2,PRKCI                                                                                                      |
| ICOS-ICOSL Signaling in T Helper Cells                    | 0     | 0.0178  | #NUM! | CALM1 (includes others),HLA-A,HLA-B,HLA-DMA,HLA-DRA,HLA-DRB1,NFKBIA,RAC1,RELA                                     |
| Lipid Antigen Presentation by CD1                         | 0     | 0.00482 | #NUM! | AP2B1,PSAP                                                                                                        |
| DNA Methylation and Transcriptional Repression Signaling  | 0     | 0.0179  | #NUM! | RELA,TP53                                                                                                         |
| Antiproliferative Role of Somatostatin Receptor 2         | 0     | 0.013   | #NUM! | GNB1                                                                                                              |
| Growth Hormone Signaling                                  | 0     | 0.0282  | #NUM! | PRKCI,STAT1                                                                                                       |
| Type I Diabetes Mellitus Signaling                        | 0     | 0.0236  | #NUM! | HLA-A,HLA-B,HLA-C,HLA-DMA,HLA-DRA,HLA-DRB1,IL1R1,JAK1,MYD88,NFKBIA,RELA,STAT1                                     |
| Allograft Rejection Signaling                             | 0     | 0.0123  | #NUM! | HLA-A,HLA-B,HLA-C,HLA-DMA,HLA-DRA,HLA-DRB1                                                                        |
| Autoimmune Thyroid Disease Signaling                      | 0     | 0.0131  | #NUM! | HLA-A,HLA-B,HLA-C,HLA-DMA,HLA-DRA,HLA-DRB1                                                                        |

|                                                                      |   |         |       |                                                                                                                                                                  |
|----------------------------------------------------------------------|---|---------|-------|------------------------------------------------------------------------------------------------------------------------------------------------------------------|
| Graft-versus-Host Disease Signaling                                  | 0 | 0.0179  | #NUM! | HLA-A,HLA-B,HLA-C,HLA-DMA,HLA-DRA,HLA-DRB1,IL18,IL6                                                                                                              |
| Communication between Innate and Adaptive Immune Cells               | 0 | 0.00857 | #NUM! | CXCL8,HLA-A,HLA-B,HLA-C,HLA-DRA,HLA-DRB1,IL18,IL6                                                                                                                |
| Systemic Lupus Erythematosus Signaling                               | 0 | 0.0127  | #NUM! | HLA-A,HLA-B,HLA-C,IL18,IL6,RNU6-1,RNU6-15P,SF3B4                                                                                                                 |
| FAK Signaling                                                        | 0 | 0.025   | #NUM! | ACTR2,ADORA2B,ARPC2,CAPN1,CAPNS1,CCND1,CTNNB1,F2RL1,FZD6,GPR108,GPR143,GPRC5A,IL1R1,ITGA3,ITGAV,ITGB1,ITGB3,ITGB4,ITGB8,MET,MMP14,NPFFR2,RAC1,RXF P1,TGFBR2,TP53 |
| Altered T Cell and B Cell Signaling in Rheumatoid Arthritis          | 0 | 0.0202  | #NUM! | CSF1,HLA-A,HLA-B,HLA-DMA,HLA-DRA,HLA-DRB1,IL18,IL6,RELA,SPP1                                                                                                     |
| Leptin Signaling in Obesity                                          | 0 | 0.0132  | #NUM! | PRKAG2                                                                                                                                                           |
| Regulation of IL-2 Expression in Activated and Anergic T Lymphocytes | 0 | 0.0173  | #NUM! | CALM1 (includes others),MALT1,NFKBIA,RAC1,RELA,TGFBR2,TOB1,VAV3                                                                                                  |
| Granzyme A Signaling                                                 | 0 | 0.0267  | #NUM! | H1-5,NDUFS5                                                                                                                                                      |
| NUR77 Signaling in T Lymphocytes                                     | 0 | 0.0195  | #NUM! | CALM1 (includes others),HLA-A,HLA-B,HLA-C,HLA-DMA,HLA-DRA,HLA-DRB1,PCNA,PRKCI,TNFSF10                                                                            |
| PKC $\theta$ Signaling in T Lymphocytes                              | 0 | 0.0179  | #NUM! | HLA-A,HLA-B,HLA-DMA,HLA-DRA,HLA-DRB1,MALT1,NFKBIA,RAC1,RELA,VAV3                                                                                                 |
| Role of MAPK Signaling in the Pathogenesis of Influenza              | 0 | 0.0244  | #NUM! | ATF2,PLAAT4                                                                                                                                                      |
| Antiproliferative Role of TOB in T Cell Signaling                    | 0 | 0.00704 | #NUM! | CCNA2,TGFBR2,TOB1                                                                                                                                                |
| OX40 Signaling Pathway                                               | 0 | 0.0188  | #NUM! | BCL2L1,HLA-A,HLA-B,HLA-C,HLA-DMA,HLA-DRA,HLA-DRB1,NFKBIA,RELA                                                                                                    |
| Intrinsic Prothrombin Activation Pathway                             | 0 | 0.0238  | #NUM! | KLK10                                                                                                                                                            |
| Cell Cycle Control of Chromosomal Replication                        | 0 | 0.0179  | #NUM! | PCNA                                                                                                                                                             |
| Role of JAK1 and JAK3 in yc Cytokine Signaling                       | 0 | 0.029   | #NUM! | JAK1,STAT1                                                                                                                                                       |
| Telomerase Signaling                                                 | 0 | 0.0278  | #NUM! | HSP90AA1,PPP2R2A,TP53                                                                                                                                            |
| Hematopoiesis from Pluripotent Stem Cells                            | 0 | 0.00674 | #NUM! | CSF1,CXCL8,IL6                                                                                                                                                   |
| VEGF Family Ligand-Receptor Interactions                             | 0 | 0.0238  | #NUM! | NRP1,PRKCI                                                                                                                                                       |
| ERB2-ERBB3 Signaling                                                 | 0 | 0.0154  | #NUM! | CCND1                                                                                                                                                            |
| GDNF Family Ligand-Receptor Interactions                             | 0 | 0.0263  | #NUM! | CDC42,RAC1                                                                                                                                                       |
| Netrin Signaling                                                     | 0 | 0.0278  | #NUM! | PRKAG2,RAC1                                                                                                                                                      |
| Heparan Sulfate Biosynthesis                                         | 0 | 0.0227  | #NUM! | CHST15,SULT1A3/SULT1A4                                                                                                                                           |
| Heparan Sulfate Biosynthesis (Late Stages)                           | 0 | 0.0247  | #NUM! | CHST15,SULT1A3/SULT1A4                                                                                                                                           |
| Pyrimidine Ribonucleotides De Novo Biosynthesis                      | 0 | 0.025   | #NUM! | CMPK1                                                                                                                                                            |
| tRNA Splicing                                                        | 0 | 0.0217  | #NUM! | PDE1C                                                                                                                                                            |
| Pyridoxal 5'-phosphate Salvage Pathway                               | 0 | 0.0308  | #NUM! | CSNK1D,PLK1                                                                                                                                                      |
| Phospholipases                                                       | 0 | 0.0299  | #NUM! | HMOX1,PLAAT4                                                                                                                                                     |
| Glutathione-mediated Detoxification                                  | 0 | 0.027   | #NUM! | GSTP1                                                                                                                                                            |
| tRNA Charging                                                        | 0 | 0.0256  | #NUM! | GARS1                                                                                                                                                            |
| Nicotine Degradation II                                              | 0 | 0.0303  | #NUM! | POR,UGT1A9 (includes others)                                                                                                                                     |
| Retinol Biosynthesis                                                 | 0 | 0.0213  | #NUM! | AKR1C3                                                                                                                                                           |
| Salvage Pathways of Pyrimidine Ribonucleotides                       | 0 | 0.0309  | #NUM! | CMPK1,CSNK1D,PLK1                                                                                                                                                |
| Pyrimidine Ribonucleotides Interconversion                           | 0 | 0.027   | #NUM! | CMPK1                                                                                                                                                            |
| Noradrenaline and Adrenaline Degradation                             | 0 | 0.027   | #NUM! | ADH6                                                                                                                                                             |
| Acetone Degradation I (to Methylglyoxal)                             | 0 | 0.0233  | #NUM! | POR                                                                                                                                                              |
| Oxidative Ethanol Degradation III                                    | 0 | 0.0175  | #NUM! | ACSL1                                                                                                                                                            |
| Fatty Acid $\beta$ -oxidation I                                      | 0 | 0.0286  | #NUM! | ACSL1                                                                                                                                                            |
| G $\alpha$ i Signaling                                               | 0 | 0.0286  | #NUM! | GNAI1,GNAI2,GNB1,PRKAG2                                                                                                                                          |
| STAT3 Pathway                                                        | 0 | 0.0296  | #NUM! | FGFR2,IL1R1,RAC1,TGFBR2                                                                                                                                          |
| Oxidative Phosphorylation                                            | 0 | 0.00901 | #NUM! | NDUFS5                                                                                                                                                           |
| SAPK/JNK Signaling                                                   | 0 | 0.012   | #NUM! | ATF2,CDC42,DUSP4,GNB1,RAC1,TP53                                                                                                                                  |
| IL-2 Signaling                                                       | 0 | 0.0164  | #NUM! | JAK1                                                                                                                                                             |
| B Cell Receptor Signaling                                            | 0 | 0.0236  | #NUM! | ATF2,BCL2L1,CALM1 (includes others),CDC42,CFL1,CREB3,CREB5,CREBBP,INPPL1,MALT1,NFKBIA,PIK3AP1,RAC1,RELA,VAV3                                                     |
| Dopamine Receptor Signaling                                          | 0 | 0.025   | #NUM! | PPP2R2A,PRKAG2                                                                                                                                                   |
| Notch Signaling                                                      | 0 | 0.0263  | #NUM! | PSENEN                                                                                                                                                           |

|                                                          |   |         |       |                                                                                                                                                    |
|----------------------------------------------------------|---|---------|-------|----------------------------------------------------------------------------------------------------------------------------------------------------|
| NF-κB Signaling                                          | 0 | 0.0193  | #NUM! | CREBBP,FGFR2,IL18,IL1R1,MALT1,MYD88,NFKBIA,RELA,TGFBR2,TNFAIP3,UBE2V1                                                                              |
| T Cell Receptor Signaling                                | 0 | 0.0292  | #NUM! | ATF2,CALM1 (includes others),CTNNB1,DUSP5,HLA-A,HLA-B,HLA-C,HLA-DMA,HLA-DRA,HLA-DRB1,ICAM1,ITGA3,ITGB1,MALT1,NFKBIA,RAC1,RELA,VAV3                 |
| Gustation Pathway                                        | 0 | 0.0197  | #NUM! | LIPH,LRRRC8A,PRKAG2,SCNN1A                                                                                                                         |
| Cancer Drug Resistance By Drug Efflux                    | 0 | 0.0172  | #NUM! | TP53                                                                                                                                               |
| Adrenomedullin signaling pathway                         | 0 | 0.0302  | #NUM! | C3,CALM1 (includes others),HIF1A,IL18,PRKAG2,RELA                                                                                                  |
| Th17 Activation Pathway                                  | 0 | 0.0186  | #NUM! | AHR,CCL20,HIF1A,HSP90AA1,IL1R1,IL6,JAK1,MYD88,RELA                                                                                                 |
| NER (Nucleotide Excision Repair, Enhanced Pathway)       | 0 | 0.00962 | #NUM! | PCNA                                                                                                                                               |
| SPINK1 General Cancer Pathway                            | 0 | 0.029   | #NUM! | IL6,JAK1                                                                                                                                           |
| T Cell Exhaustion Signaling Pathway                      | 0 | 0.0229  | #NUM! | HLA-A,HLA-B,HLA-C,HLA-DMA,HLA-DRA,HLA-DRB1,IL6,JAK1,LGALS9,MGAT5,PPP2R2A,STAT1,TGFBR2                                                              |
| Systemic Lupus Erythematosus In B Cell Signaling Pathway | 0 | 0.029   | #NUM! | BCL2L1,CALM1 (includes others),CCND1,CCND3,CTNNB1,CXCL8,IL18,IL6,INPPL1,JAK1,MALT1,MCL1,MYD88,PIK3A P1,PLAAT4,PRKCI,RAC1,RELA,STAT1,STING1,TNFSF10 |
| Kinetochore Metaphase Signaling Pathway                  | 0 | 0.027   | #NUM! | H2AC18/H2AC19,MACROH2A1,PLK1                                                                                                                       |
| Eicosanoid Signaling                                     | 0 | 0.0294  | #NUM! | AKR1C3,PLAAT4                                                                                                                                      |
